# Supplementary material
Source: MDPI journal article supplement (https://www.mdpi.com/1420-3049/26/17/5400)

# checkCIF/PLATON report

Structure factors have been supplied for datablock(s) pot\_ag011\_1

THIS REPORT IS FOR GUIDANCE ONLY. IF USED AS PART OF A REVIEW PROCEDURE FOR PUBLICATION, IT SHOULD NOT REPLACE THE EXPERTISE OF AN EXPERIENCED CRYSTALLOGRAPHIC REFEREE.

No syntax errors found.      CIF dictionary      Interpreting this report

## Datablock: pot\_ag011\_1

---

|                 |                  |                               |
|-----------------|------------------|-------------------------------|
| Bond precision: | C-C = 0.0093 A   | Wavelength=0.71073            |
| Cell:           | a=13.3900(4)     | b=9.7545(3)      c=13.0518(4) |
|                 | alpha=90         | beta=110.436(1)      gamma=90 |
| Temperature:    | 298 K            |                               |
|                 | Calculated       | Reported                      |
| Volume          | 1597.44(9)       | 1597.44(8)                    |
| Space group     | P 21/c           | P 1 21/c 1                    |
| Hall group      | -P 2ybc          | -P 2ybc                       |
| Moiety formula  | C14 H18 Ag N7 O3 | C14 H18 Ag N7 O3              |
| Sum formula     | C14 H18 Ag N7 O3 | C14 H18 Ag N7 O3              |
| Mr              | 440.22           | 440.22                        |
| Dx,g cm-3       | 1.831            | 1.830                         |
| Z               | 4                | 4                             |
| Mu (mm-1)       | 1.294            | 1.294                         |
| F000            | 888.0            | 888.0                         |
| F000'           | 884.70           |                               |
| h,k,lmax        | 15,11,15         | 15,11,15                      |
| Nref            | 2630             | 2630                          |
| Tmin,Tmax       | 0.883,0.937      | 0.688,0.745                   |
| Tmin'           | 0.845            |                               |

Correction method= # Reported T Limits: Tmin=0.688 Tmax=0.745  
AbsCorr = MULTI-SCAN

Data completeness= 1.000      Theta(max)= 24.405

R(reflections)= 0.0549( 1961)      wR2(reflections)= 0.1478( 2630)

S = 1.047      Npar= 263

---

The following ALERTS were generated. Each ALERT has the format

**test-name\_ALERT\_alert-type\_alert-level.**

Click on the hyperlinks for more details of the test.

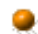

#### Alert level B

PLAT232\_ALERT\_2\_B Hirshfeld Test Diff (M-X) Ag1 --N15\_b . 12.7 s.u.

**Author Response: There is no doubt that assignment of Ag and N atoms is correct, because the reagents containing these elements were used for the synthesis. Uncorrelated anisotropic parameters of Ag1 and N15 can be due to low rigidity of the corresponding bond or a slight disorder of the Ag atom.**

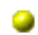

#### Alert level C

THETM01\_ALERT\_3\_C The value of  $\sin(\theta_{\max})/\text{wavelength}$  is less than 0.590  
Calculated  $\sin(\theta_{\max})/\text{wavelength} = 0.5814$   
PLAT094\_ALERT\_2\_C Ratio of Maximum / Minimum Residual Density .... 2.47 Report  
PLAT234\_ALERT\_4\_C Large Hirshfeld Difference Ag1 --O14 0.17 Ang.  
PLAT241\_ALERT\_2\_C High 'MainMol' Ueq as Compared to Neighbors of N12 Check  
PLAT242\_ALERT\_2\_C Low 'MainMol' Ueq as Compared to Neighbors of Ag1 Check  
PLAT342\_ALERT\_3\_C Low Bond Precision on C-C Bonds ..... 0.00933 Ang.  
PLAT906\_ALERT\_3\_C Large K Value in the Analysis of Variance ..... 2.404 Check  
PLAT971\_ALERT\_2\_C Check Calcd Resid. Dens. 0.85A From Ag1 2.19 eA-3

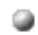

#### Alert level G

PLAT002\_ALERT\_2\_G Number of Distance or Angle Restraints on AtSite 8 Note  
PLAT003\_ALERT\_2\_G Number of Uiso or Uij Restrained non-H Atoms ... 8 Report  
PLAT004\_ALERT\_5\_G Polymeric Structure Found with Maximum Dimension 3 Info  
PLAT083\_ALERT\_2\_G SHELXL Second Parameter in WGHT Unusually Large 6.71 Why ?  
PLAT172\_ALERT\_4\_G The CIF-Embedded .res File Contains DFIX Records 2 Report  
PLAT173\_ALERT\_4\_G The CIF-Embedded .res File Contains DANG Records 6 Report  
PLAT174\_ALERT\_4\_G The CIF-Embedded .res File Contains FLAT Records 2 Report  
PLAT187\_ALERT\_4\_G The CIF-Embedded .res File Contains RIGU Records 2 Report  
PLAT301\_ALERT\_3\_G Main Residue Disorder .....(Resd 1 ) 16% Note  
PLAT860\_ALERT\_3\_G Number of Least-Squares Restraints ..... 50 Note  
PLAT909\_ALERT\_3\_G Percentage of I>2sig(I) Data at Theta(Max) Still 35% Note  
PLAT978\_ALERT\_2\_G Number C-C Bonds with Positive Residual Density. 1 Info

- 0 **ALERT level A** = Most likely a serious problem - resolve or explain  
1 **ALERT level B** = A potentially serious problem, consider carefully  
8 **ALERT level C** = Check. Ensure it is not caused by an omission or oversight  
12 **ALERT level G** = General information/check it is not something unexpected

- 0 ALERT type 1 CIF construction/syntax error, inconsistent or missing data  
9 ALERT type 2 Indicator that the structure model may be wrong or deficient  
6 ALERT type 3 Indicator that the structure quality may be low  
5 ALERT type 4 Improvement, methodology, query or suggestion  
1 ALERT type 5 Informative message, check

It is advisable to attempt to resolve as many as possible of the alerts in all categories. Often the minor alerts point to easily fixed oversights, errors and omissions in your CIF or refinement strategy, so attention to these fine details can be worthwhile. In order to resolve some of the more serious problems it may be necessary to carry out additional measurements or structure refinements. However, the purpose of your study may justify the reported deviations and the more serious of these should normally be commented upon in the discussion or experimental section of a paper or in the "special\_details" fields of the CIF. checkCIF was carefully designed to identify outliers and unusual parameters, but every test has its limitations and alerts that are not important in a particular case may appear. Conversely, the absence of alerts does not guarantee there are no aspects of the results needing attention. It is up to the individual to critically assess their own results and, if necessary, seek expert advice.

### **Publication of your CIF in IUCr journals**

A basic structural check has been run on your CIF. These basic checks will be run on all CIFs submitted for publication in IUCr journals (*Acta Crystallographica*, *Journal of Applied Crystallography*, *Journal of Synchrotron Radiation*); however, if you intend to submit to *Acta Crystallographica Section C* or *E* or *IUCrData*, you should make sure that full publication checks are run on the final version of your CIF prior to submission.

### **Publication of your CIF in other journals**

Please refer to the *Notes for Authors* of the relevant journal for any special instructions relating to CIF submission.

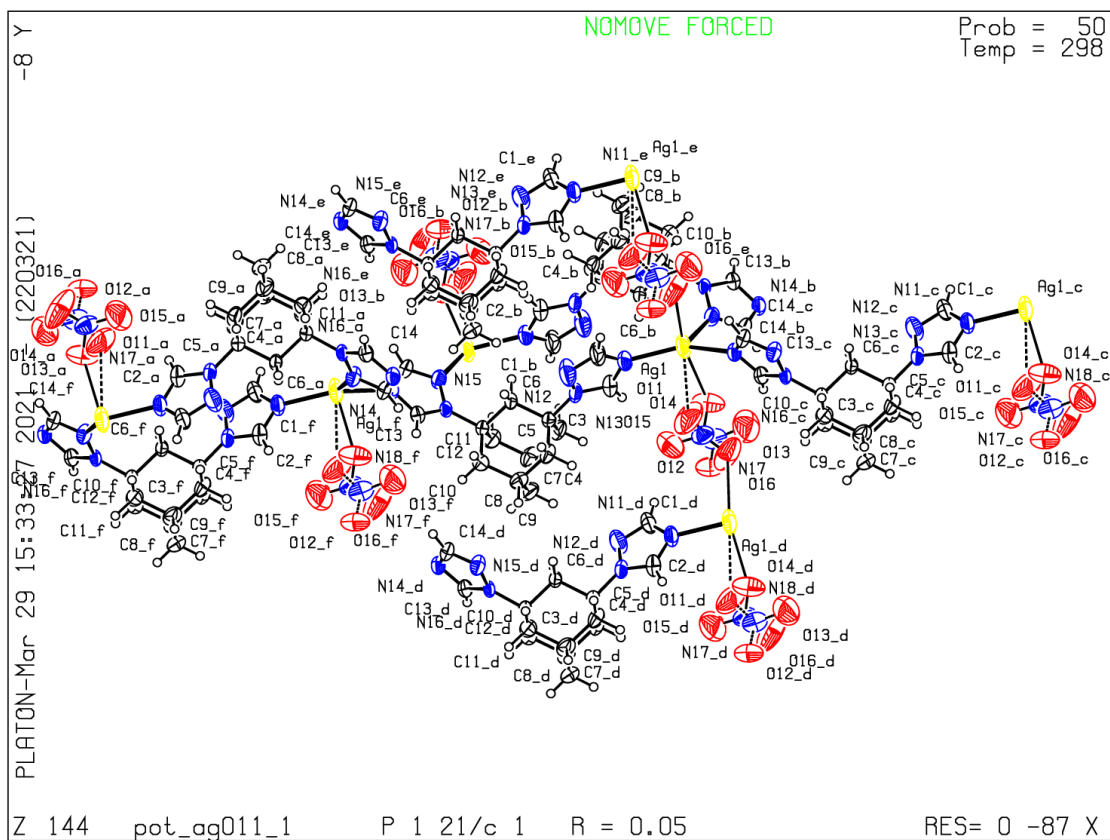

Supplement: s1 [file s1]
