# Supplementary material
Source: MDPI journal article supplement (https://www.mdpi.com/1420-3049/26/17/5400)

# checkCIF/PLATON report

Structure factors have been supplied for datablock(s) pot\_cd520

THIS REPORT IS FOR GUIDANCE ONLY. IF USED AS PART OF A REVIEW PROCEDURE FOR PUBLICATION, IT SHOULD NOT REPLACE THE EXPERTISE OF AN EXPERIENCED CRYSTALLOGRAPHIC REFEREE.

No syntax errors found.      CIF dictionary      Interpreting this report

## Datablock: pot\_cd520

---

|                 |                   |                    |             |
|-----------------|-------------------|--------------------|-------------|
| Bond precision: | C-C = 0.0036 A    | Wavelength=0.71073 |             |
| Cell:           | a=11.3904(13)     | b=13.4621(12)      | c=20.904(2) |
|                 | alpha=90          | beta=93.070(4)     | gamma=90    |
| Temperature:    | 150 K             |                    |             |
|                 | Calculated        | Reported           |             |
| Volume          | 3200.8(6)         | 3200.7(6)          |             |
| Space group     | P 21/n            | P 1 21/n 1         |             |
| Hall group      | -P 2yn            | -P 2yn             |             |
| Moiety formula  | C28 H36 Cd N14 O6 | C28 H36 Cd N14 O6  |             |
| Sum formula     | C28 H36 Cd N14 O6 | C28 H36 Cd N14 O6  |             |
| Mr              | 777.12            | 777.11             |             |
| Dx,g cm-3       | 1.613             | 1.613              |             |
| Z               | 4                 | 4                  |             |
| Mu (mm-1)       | 0.749             | 0.749              |             |
| F000            | 1592.0            | 1592.0             |             |
| F000'           | 1589.33           |                    |             |
| h,k,lmax        | 13,16,25          | 13,16,25           |             |
| Nref            | 6097              | 6089               |             |
| Tmin,Tmax       | 0.931,0.963       | 0.630,0.745        |             |
| Tmin'           | 0.741             |                    |             |

Correction method= # Reported T Limits: Tmin=0.630 Tmax=0.745  
AbsCorr = MULTI-SCAN

Data completeness= 0.999      Theta(max)= 25.695

R(reflections)= 0.0315( 4920)      wR2(reflections)= 0.0720( 6089)

S = 1.007      Npar= 442

---

The following ALERTS were generated. Each ALERT has the format

**test-name\_ALERT\_alert-type\_alert-level.**

Click on the hyperlinks for more details of the test.

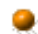

#### Alert level B

PLAT232\_ALERT\_2\_B Hirshfeld Test Diff (M-X) Cd1 --O12 . 11.6 s.u.

**Author Response:** There is no doubt that assignment of Cd and O atoms is correct, because the reagents containing these elements were used for the synthesis. Uncorrelated anisotropic parameters of Cd1 and O12 can be due to low rigidity of the corresponding bond which has mainly ionic character.

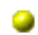

#### Alert level C

PLAT213\_ALERT\_2\_C Atom O13 has ADP max/min Ratio ..... 3.4 prolat  
PLAT220\_ALERT\_2\_C NonSolvent Resd 1 O Ueq(max)/Ueq(min) Range 3.1 Ratio  
PLAT230\_ALERT\_2\_C Hirshfeld Test Diff for O23 --N4 . 5.5 s.u.  
PLAT241\_ALERT\_2\_C High 'MainMol' Ueq as Compared to Neighbors of O11 Check  
PLAT242\_ALERT\_2\_C Low 'MainMol' Ueq as Compared to Neighbors of N3 Check  
PLAT911\_ALERT\_3\_C Missing FCF Refl Between Thmin & STh/L= 0.600 5 Report  
PLAT976\_ALERT\_2\_C Check Calcd Resid. Dens. 1.03A From O13 -0.41 eA-3

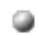

#### Alert level G

PLAT004\_ALERT\_5\_G Polymeric Structure Found with Maximum Dimension 1 Info  
PLAT232\_ALERT\_2\_G Hirshfeld Test Diff (M-X) Cd1 --O11 . 18.1 s.u.

**Author Response:** There is no doubt that assignment of Cd and O atoms is correct, because the reagents containing these elements were used for the synthesis. Uncorrelated anisotropic parameters of Cd1 and O12 can be due to low rigidity of the corresponding bond which has mainly ionic character.

PLAT794\_ALERT\_5\_G Tentative Bond Valency for Cd1 (II) . 2.03 Info  
PLAT804\_ALERT\_5\_G Number of ARU-Code Packing Problem(s) in PLATON 1 Info  
PLAT912\_ALERT\_4\_G Missing # of FCF Reflections Above STh/L= 0.600 3 Note  
PLAT941\_ALERT\_3\_G Average HKL Measurement Multiplicity ..... 3.1 Low  
PLAT978\_ALERT\_2\_G Number C-C Bonds with Positive Residual Density. 7 Info

- 
- 0 **ALERT level A** = Most likely a serious problem - resolve or explain  
1 **ALERT level B** = A potentially serious problem, consider carefully  
7 **ALERT level C** = Check. Ensure it is not caused by an omission or oversight  
7 **ALERT level G** = General information/check it is not something unexpected

- 0 ALERT type 1 CIF construction/syntax error, inconsistent or missing data  
9 ALERT type 2 Indicator that the structure model may be wrong or deficient  
2 ALERT type 3 Indicator that the structure quality may be low  
1 ALERT type 4 Improvement, methodology, query or suggestion  
3 ALERT type 5 Informative message, check
- 
-

It is advisable to attempt to resolve as many as possible of the alerts in all categories. Often the minor alerts point to easily fixed oversights, errors and omissions in your CIF or refinement strategy, so attention to these fine details can be worthwhile. In order to resolve some of the more serious problems it may be necessary to carry out additional measurements or structure refinements. However, the purpose of your study may justify the reported deviations and the more serious of these should normally be commented upon in the discussion or experimental section of a paper or in the "special\_details" fields of the CIF. checkCIF was carefully designed to identify outliers and unusual parameters, but every test has its limitations and alerts that are not important in a particular case may appear. Conversely, the absence of alerts does not guarantee there are no aspects of the results needing attention. It is up to the individual to critically assess their own results and, if necessary, seek expert advice.

### **Publication of your CIF in IUCr journals**

A basic structural check has been run on your CIF. These basic checks will be run on all CIFs submitted for publication in IUCr journals (*Acta Crystallographica*, *Journal of Applied Crystallography*, *Journal of Synchrotron Radiation*); however, if you intend to submit to *Acta Crystallographica Section C* or *E* or *IUCrData*, you should make sure that full publication checks are run on the final version of your CIF prior to submission.

### **Publication of your CIF in other journals**

Please refer to the *Notes for Authors* of the relevant journal for any special instructions relating to CIF submission.

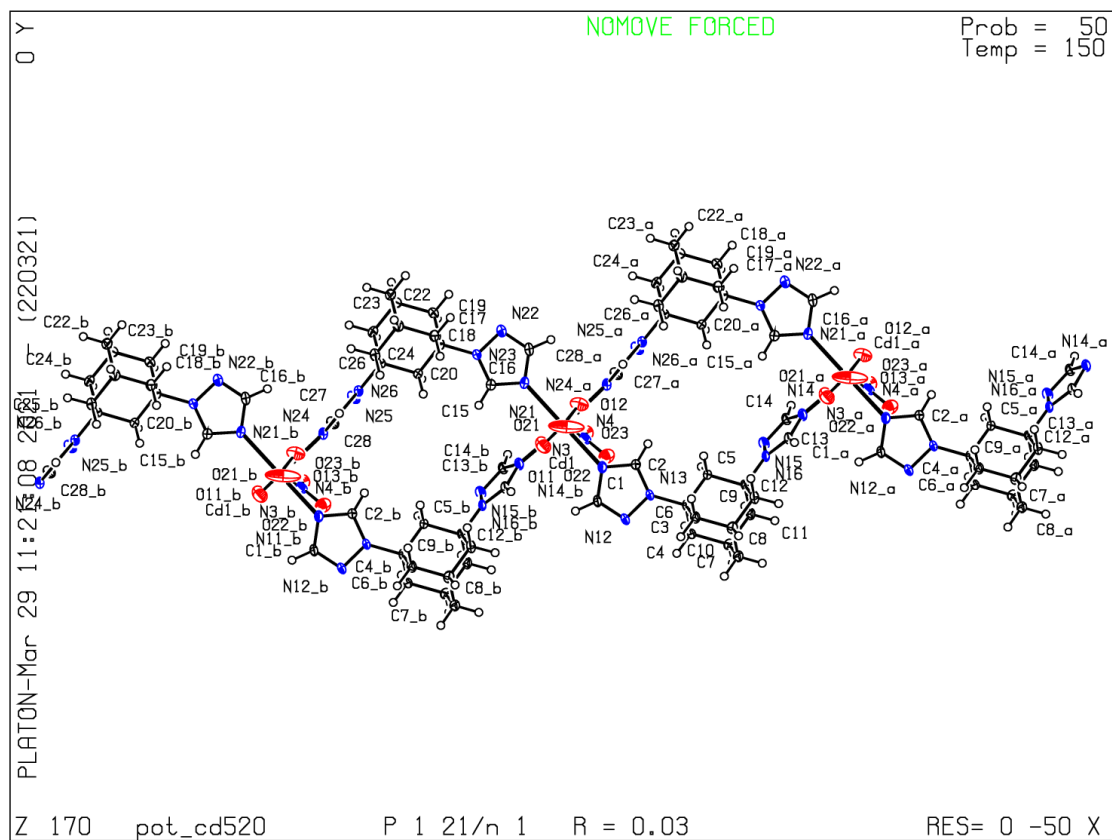

Supplement: s1 [file s1]
