# Supplementary material for: Synthesis, Crystal Structure, and Luminescence of Cadmium(II) and Silver(I) Coordination Polymers Based on 1,3-Bis(1,2,4-triazol-1-yl)adamantane
Source: MDPI journal article supplement (doi:10.3390/molecules26175400), 2021-09-05

# checkCIF/PLATON report

Structure factors have been supplied for datablock(s) pot\_cd008\_1

THIS REPORT IS FOR GUIDANCE ONLY. IF USED AS PART OF A REVIEW PROCEDURE FOR PUBLICATION, IT SHOULD NOT REPLACE THE EXPERTISE OF AN EXPERIENCED CRYSTALLOGRAPHIC REFEREE.

No syntax errors found.      CIF dictionary      Interpreting this report

## Datablock: pot\_cd008\_1

---

|                 |                             |                                 |
|-----------------|-----------------------------|---------------------------------|
| Bond precision: | C-C = 0.0132 Å              | Wavelength=0.71073              |
| Cell:           | a=14.4331(6)                | b=12.1592(6)      c=25.3803(12) |
|                 | alpha=90                    | beta=104.848(2)      gamma=90   |
| Temperature:    | 298 K                       |                                 |
|                 | Calculated                  | Reported                        |
| Volume          | 4305.4(3)                   | 4305.4(3)                       |
| Space group     | P 21/c                      | P 1 21/c 1                      |
| Hall group      | -P 2ybc                     | -P 2ybc                         |
| Moiety formula  | 2(C15 H22 Cd N8 O7), C H4 O | C15 H22 Cd N8 O7, 0.5(C H4 O)   |
| Sum formula     | C31 H48 Cd2 N16 O15         | C15.50 H24 Cd N8 O7.50          |
| Mr              | 1109.67                     | 554.83                          |
| Dx, g cm-3      | 1.712                       | 1.712                           |
| Z               | 4                           | 8                               |
| Mu (mm-1)       | 1.073                       | 1.073                           |
| F000            | 2248.0                      | 2248.0                          |
| F000'           | 2242.50                     |                                 |
| h,k,lmax        | 17,14,30                    | 17,14,30                        |
| Nref            | 7607                        | 7600                            |
| Tmin,Tmax       | 0.793,0.928                 | 0.648,0.745                     |
| Tmin'           | 0.765                       |                                 |

Correction method= # Reported T Limits: Tmin=0.648 Tmax=0.745  
AbsCorr = MULTI-SCAN

Data completeness= 0.999      Theta(max)= 25.026

R(reflections)= 0.0724( 5278)      wR2(reflections)= 0.1631( 7600)

S = 1.168      Npar= 587

---

The following ALERTS were generated. Each ALERT has the format

**test-name\_ALERT\_alert-type\_alert-level.**

Click on the hyperlinks for more details of the test.

### ● Alert level C

|                   |                                                  |           |                                 |   |              |
|-------------------|--------------------------------------------------|-----------|---------------------------------|---|--------------|
| PLAT232_ALERT_2_C | Hirshfeld Test Diff (M-X)                        | Cd1       | --O31                           | . | 5.6 s.u.     |
| PLAT232_ALERT_2_C | Hirshfeld Test Diff (M-X)                        | Cd2       | --O51                           | . | 5.2 s.u.     |
| PLAT241_ALERT_2_C | High                                             | 'MainMol' | Ueq as Compared to Neighbors of |   | 031 Check    |
| PLAT241_ALERT_2_C | High                                             | 'MainMol' | Ueq as Compared to Neighbors of |   | 032 Check    |
| PLAT241_ALERT_2_C | High                                             | 'MainMol' | Ueq as Compared to Neighbors of |   | 041 Check    |
| PLAT241_ALERT_2_C | High                                             | 'MainMol' | Ueq as Compared to Neighbors of |   | 042 Check    |
| PLAT241_ALERT_2_C | High                                             | 'MainMol' | Ueq as Compared to Neighbors of |   | 08 Check     |
| PLAT241_ALERT_2_C | High                                             | 'MainMol' | Ueq as Compared to Neighbors of |   | 051 Check    |
| PLAT241_ALERT_2_C | High                                             | 'MainMol' | Ueq as Compared to Neighbors of |   | 052 Check    |
| PLAT241_ALERT_2_C | High                                             | 'MainMol' | Ueq as Compared to Neighbors of |   | 062 Check    |
| PLAT242_ALERT_2_C | Low                                              | 'MainMol' | Ueq as Compared to Neighbors of |   | Cd1 Check    |
| PLAT242_ALERT_2_C | Low                                              | 'MainMol' | Ueq as Compared to Neighbors of |   | N3 Check     |
| PLAT242_ALERT_2_C | Low                                              | 'MainMol' | Ueq as Compared to Neighbors of |   | N4 Check     |
| PLAT242_ALERT_2_C | Low                                              | 'MainMol' | Ueq as Compared to Neighbors of |   | Cd2 Check    |
| PLAT242_ALERT_2_C | Low                                              | 'MainMol' | Ueq as Compared to Neighbors of |   | N5 Check     |
| PLAT242_ALERT_2_C | Low                                              | 'MainMol' | Ueq as Compared to Neighbors of |   | N6 Check     |
| PLAT342_ALERT_3_C | Low Bond Precision on C-C Bonds                  | .....     |                                 |   | 0.01321 Ang. |
| PLAT906_ALERT_3_C | Large K Value in the Analysis of Variance        | .....     |                                 |   | 16.972 Check |
| PLAT906_ALERT_3_C | Large K Value in the Analysis of Variance        | .....     |                                 |   | 3.519 Check  |
| PLAT911_ALERT_3_C | Missing FCF Refl Between Thmin & STh/L=          | 0.595     |                                 |   | 8 Report     |
| PLAT934_ALERT_3_C | Number of (Iobs-Icalc)/Sigma(W) > 10 Outliers .. |           |                                 |   | 1 Check      |
| PLAT975_ALERT_2_C | Check Calcd Resid. Dens.                         | 0.95A     | From O53                        |   | 0.45 eA-3    |

### ● Alert level G

|                   |                                                  |     |                    |   |              |
|-------------------|--------------------------------------------------|-----|--------------------|---|--------------|
| PLAT002_ALERT_2_G | Number of Distance or Angle Restraints on AtSite |     |                    |   | 8 Note       |
| PLAT003_ALERT_2_G | Number of Uiso or Uij Restrained non-H Atoms ... |     |                    |   | 6 Report     |
| PLAT004_ALERT_5_G | Polymeric Structure Found with Maximum Dimension |     |                    |   | 1 Info       |
| PLAT007_ALERT_5_G | Number of Unrefined Donor-H Atoms .....          |     |                    |   | 1 Report     |
| PLAT042_ALERT_1_G | Calc. and Reported Moiety Formula Strings Differ |     |                    |   | Please Check |
| PLAT045_ALERT_1_G | Calculated and Reported Z Differ by a Factor ... |     |                    |   | 0.50 Check   |
| PLAT083_ALERT_2_G | SHELXL Second Parameter in WGHT Unusually Large  |     |                    |   | 47.34 Why ?  |
| PLAT172_ALERT_4_G | The CIF-Embedded .res File Contains DFIX Records |     |                    |   | 2 Report     |
| PLAT173_ALERT_4_G | The CIF-Embedded .res File Contains DANG Records |     |                    |   | 4 Report     |
| PLAT186_ALERT_4_G | The CIF-Embedded .res File Contains ISOR Records |     |                    |   | 1 Report     |
| PLAT187_ALERT_4_G | The CIF-Embedded .res File Contains RIGU Records |     |                    |   | 2 Report     |
| PLAT232_ALERT_2_G | Hirshfeld Test Diff (M-X)                        | Cd1 | --O32              | . | 7.2 s.u.     |
| PLAT432_ALERT_2_G | Short Inter X...Y Contact                        | O43 | ..C212             |   | 2.95 Ang.    |
|                   |                                                  |     | x,y,z =            |   | 1_555 Check  |
| PLAT432_ALERT_2_G | Short Inter X...Y Contact                        | O53 | ..C7               |   | 3.01 Ang.    |
|                   |                                                  |     | 1-x,-1/2+y,3/2-z = |   | 2_646 Check  |
| PLAT432_ALERT_2_G | Short Inter X...Y Contact                        | O63 | ..C112             |   | 2.89 Ang.    |
|                   |                                                  |     | -1+x,y,z =         |   | 1_455 Check  |
| PLAT720_ALERT_4_G | Number of Unusual/Non-Standard Labels .....      |     |                    |   | 3 Note       |
| PLAT794_ALERT_5_G | Tentative Bond Valency for Cd1 (II)              |     |                    |   | 2.16 Info    |
| PLAT794_ALERT_5_G | Tentative Bond Valency for Cd2 (II)              |     |                    |   | 2.37 Info    |
| PLAT860_ALERT_3_G | Number of Least-Squares Restraints .....         |     |                    |   | 33 Note      |
| PLAT909_ALERT_3_G | Percentage of I>2sig(I) Data at Theta(Max) Still |     |                    |   | 42% Note     |
| PLAT933_ALERT_2_G | Number of OMIT Records in Embedded .res File ... |     |                    |   | 4 Note       |
| PLAT978_ALERT_2_G | Number C-C Bonds with Positive Residual Density. |     |                    |   | 0 Info       |

0 **ALERT level A** = Most likely a serious problem - resolve or explain

0 **ALERT level B** = A potentially serious problem, consider carefully

22 **ALERT level C** = Check. Ensure it is not caused by an omission or oversight

22 **ALERT level G** = General information/check it is not something unexpected

2 ALERT type 1 CIF construction/syntax error, inconsistent or missing data  
26 ALERT type 2 Indicator that the structure model may be wrong or deficient  
7 ALERT type 3 Indicator that the structure quality may be low  
5 ALERT type 4 Improvement, methodology, query or suggestion  
4 ALERT type 5 Informative message, check

---

It is advisable to attempt to resolve as many as possible of the alerts in all categories. Often the minor alerts point to easily fixed oversights, errors and omissions in your CIF or refinement strategy, so attention to these fine details can be worthwhile. In order to resolve some of the more serious problems it may be necessary to carry out additional measurements or structure refinements. However, the purpose of your study may justify the reported deviations and the more serious of these should normally be commented upon in the discussion or experimental section of a paper or in the "special\_details" fields of the CIF. checkCIF was carefully designed to identify outliers and unusual parameters, but every test has its limitations and alerts that are not important in a particular case may appear. Conversely, the absence of alerts does not guarantee there are no aspects of the results needing attention. It is up to the individual to critically assess their own results and, if necessary, seek expert advice.

### **Publication of your CIF in IUCr journals**

A basic structural check has been run on your CIF. These basic checks will be run on all CIFs submitted for publication in IUCr journals (*Acta Crystallographica*, *Journal of Applied Crystallography*, *Journal of Synchrotron Radiation*); however, if you intend to submit to *Acta Crystallographica Section C* or *E* or *IUCrData*, you should make sure that full publication checks are run on the final version of your CIF prior to submission.

### **Publication of your CIF in other journals**

Please refer to the *Notes for Authors* of the relevant journal for any special instructions relating to CIF submission.

---

**PLATON version of 13/07/2021; check.def file version of 13/07/2021**

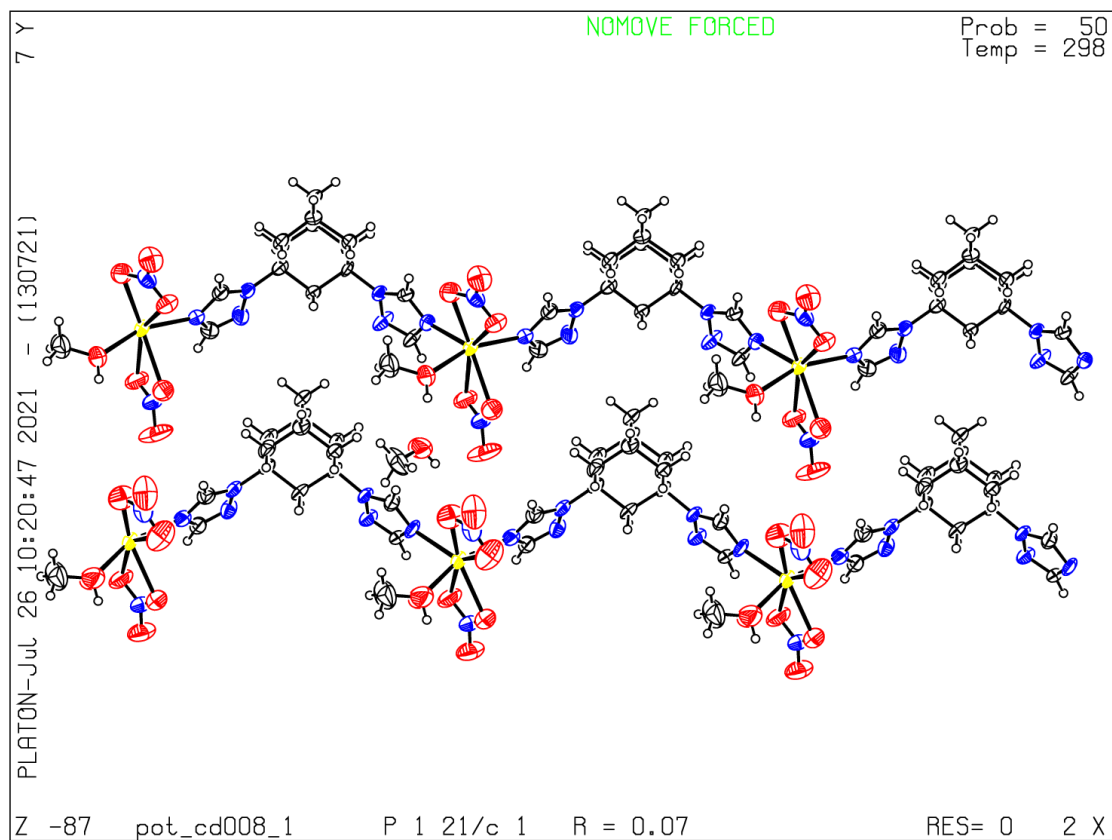

Supplement: s1 [file s1]
