# Supplementary material for: Synthesis, Crystal Structure, and Luminescence of Cadmium(II) and Silver(I) Coordination Polymers Based on 1,3-Bis(1,2,4-triazol-1-yl)adamantane
Source: MDPI journal article supplement (doi:10.3390/molecules26175400), 2021-09-05
Supplement: s1 [file s1]

# Synthesis, crystal structure and luminescence of cadmium(II) and silver(I) coordination polymers based on 1,3-bis(1,2,4-triazol-1-yl)adamantane

Roman D. Marchenko <sup>1</sup>, Taisiya S. Sukhikh <sup>2</sup>, Alexey A. Ryadun <sup>2</sup> and Andrei S. Potapov <sup>2,\*</sup>

<sup>1</sup> Kizhner Research Center, National Research Tomsk Polytechnic University, 30 Lenin Ave., 634050 Tomsk, Russia; rdm1@tpu.ru

<sup>2</sup> Nikolaev Institute of Inorganic Chemistry, Siberian Branch of the Russian Academy of Sciences, 3 Lavrentiev Ave., 630090 Novosibirsk, Russia; sukhikh@niic.nsc.ru (TS), ryadunalexey@mail.ru (AR), potapov@niic.nsc.ru (AP)

\* Correspondence: potapov@niic.nsc.ru; Tel.: +7 (383) 330-94-90

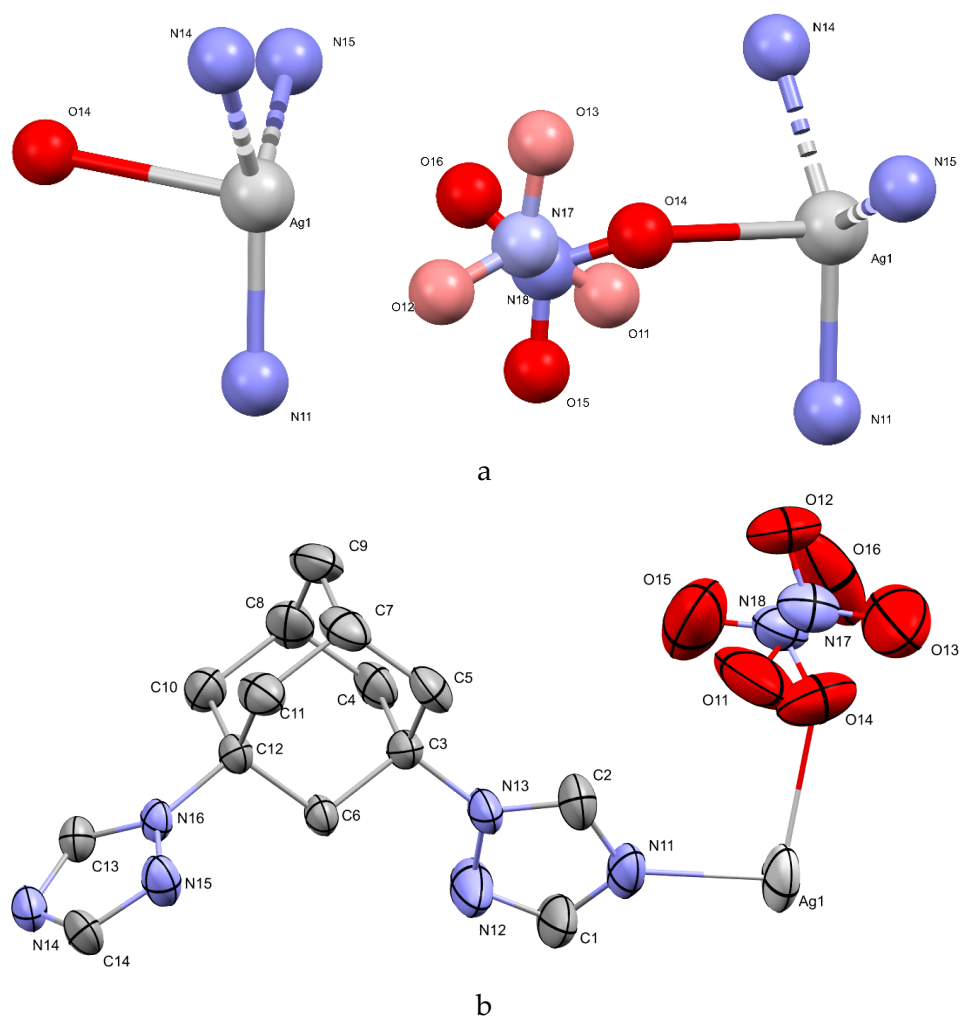

**Figure S1.** Disorder of nitrate ions in the structure of the coordination polymer 1 (a) and the asymmetric unit of the coordination polymer 1 showing both positions of the nitrate ions (b).

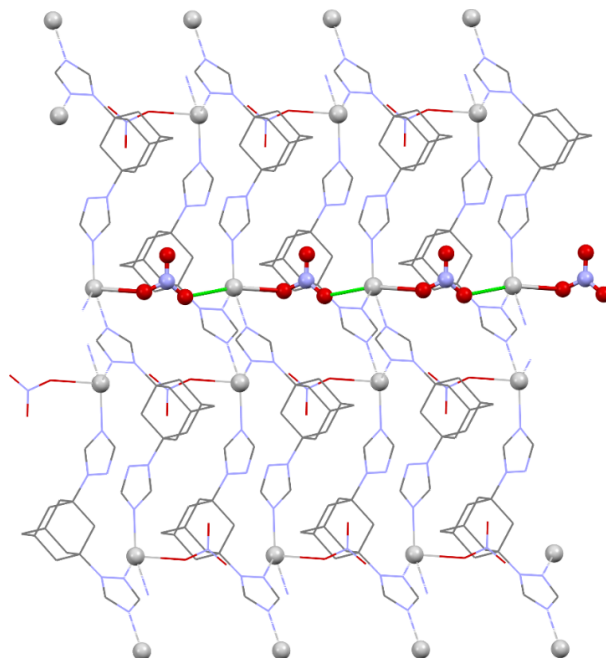

**Figure S2.** Bridging nitrate ions in the structure of the coordination polymer **1**. View along crystallographic axis *b*. Atom legend: Ag – grey balls; C – dark grey dots; N – blue balls and dots; O – red balls and dots.

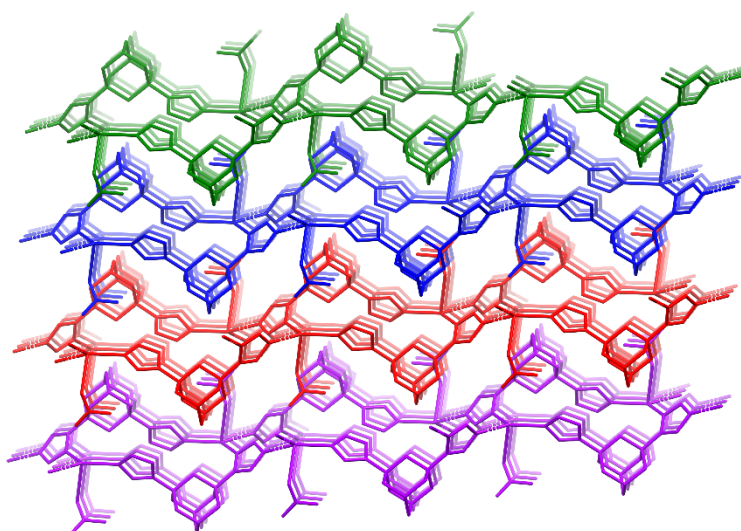

**Figure S3.** Packing of layers of the coordination polymer **1**. View along crystallographic axis *b*.

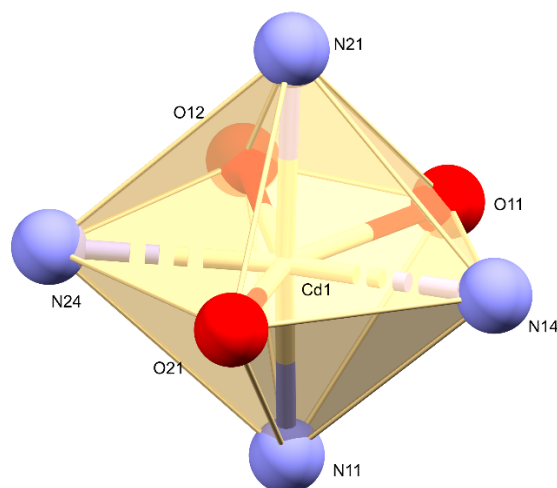

**Figure S4.** Coordination polyhedron of Cd(II) ion in the coordination polymer **2**.

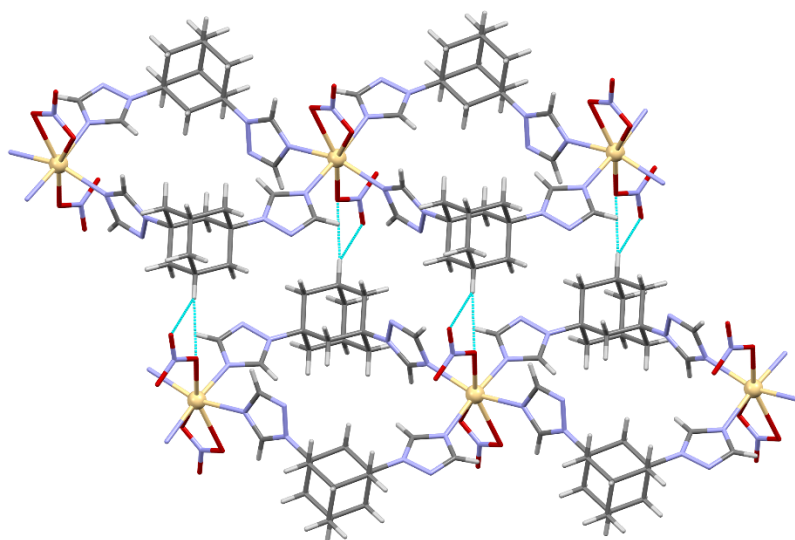

**Figure S5.** Close CH...O contacts between the chains of the coordination polymer **2**. Atom legend: Cd – yellow balls; C – dark grey dots; N – blue dots; O – red dots; H – white dots.

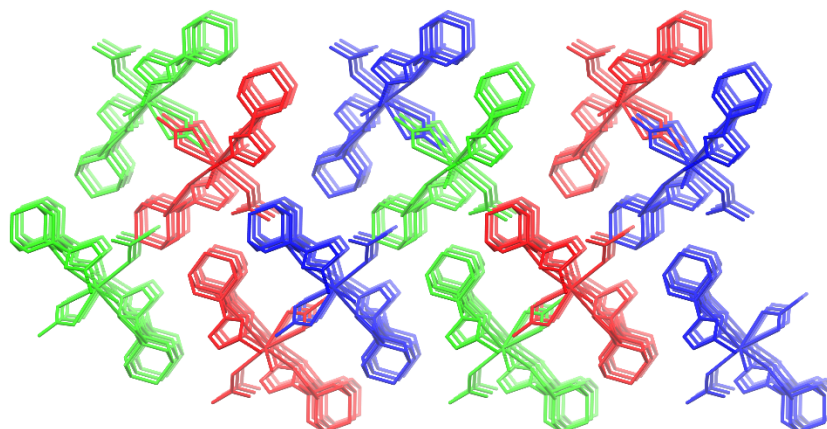

**Figure S6.** Packing of chains of the coordination polymer **1**. View along crystallographic axis *a*.

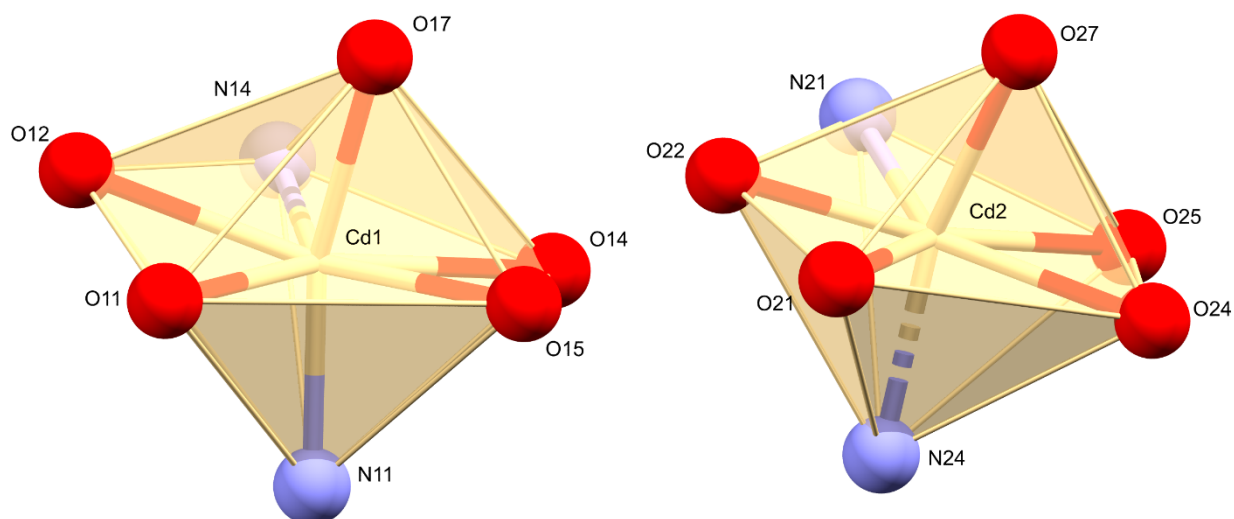

**Figure S7.** Coordination polyhedra of two crystallographically independent Cd(II) ions in the coordination polymer **3**.

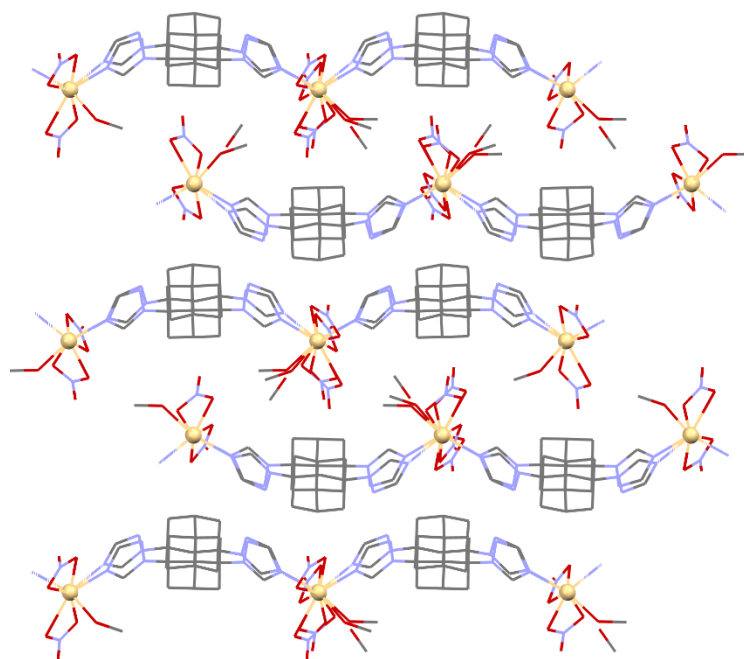

**Figure S8.** Packing of chains of the coordination polymer **3** into supramolecular layers. View along crystallographic axis *a*. Atom legend: Cd – yellow balls; C – dark grey dots; N – blue dots; O – red dots.

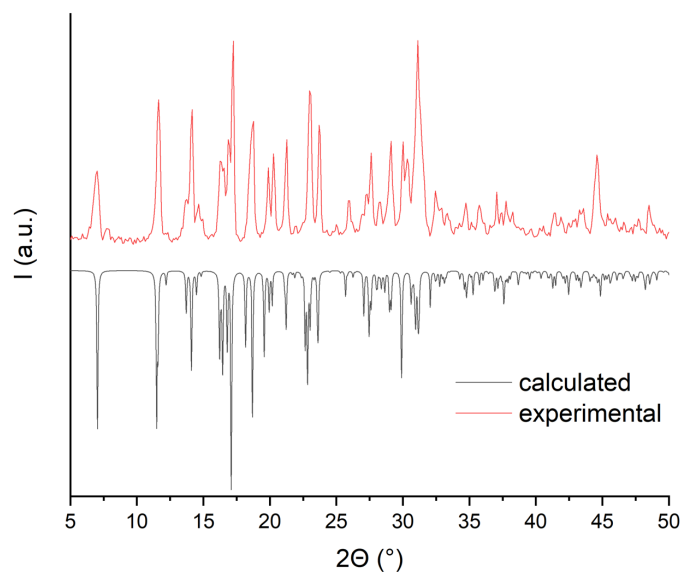

**Figure S9.** Powder X-ray diffraction plots for the coordination polymer 1.

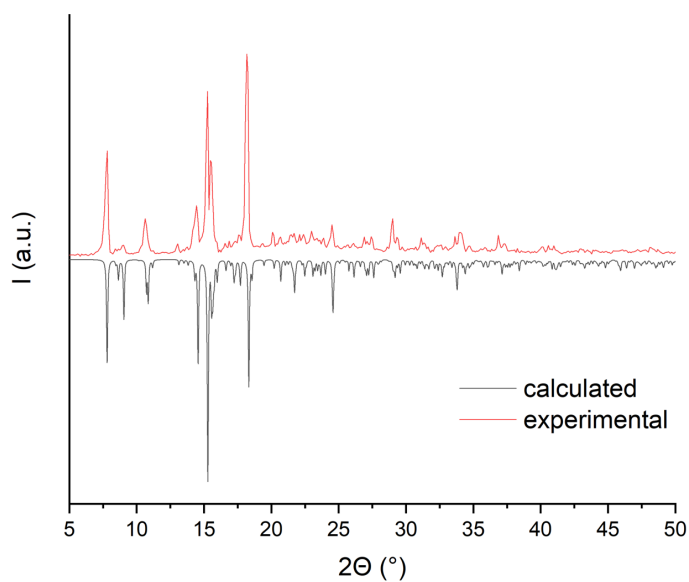

**Figure S10.** Powder X-ray diffraction plots for the coordination polymer 2.

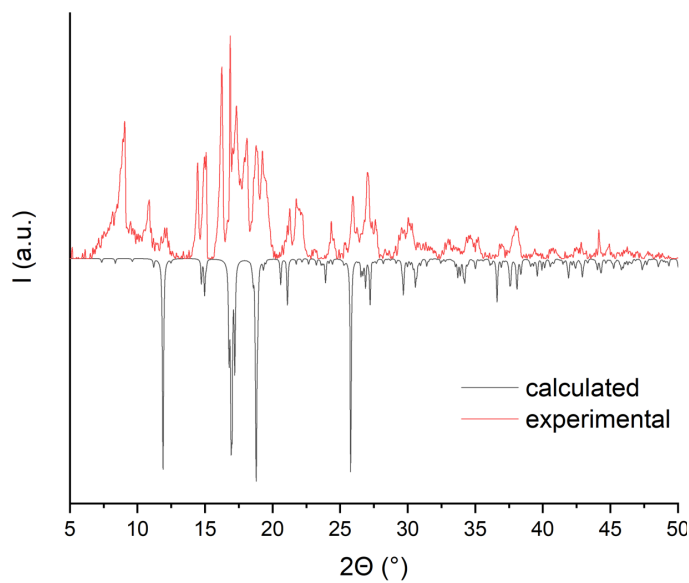

**Figure S11.** Powder X-ray diffraction plots for the coordination polymer 3.

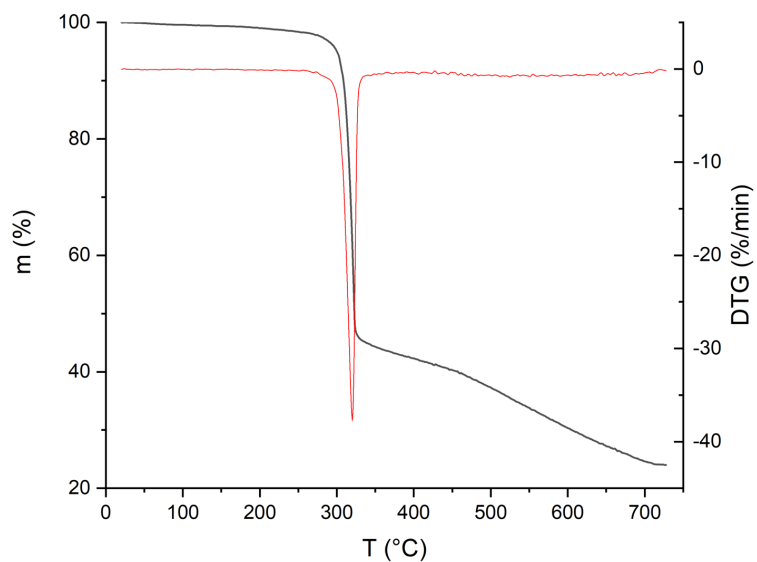

**Figure S12.** TG and DTA curves for the coordination polymer 1.

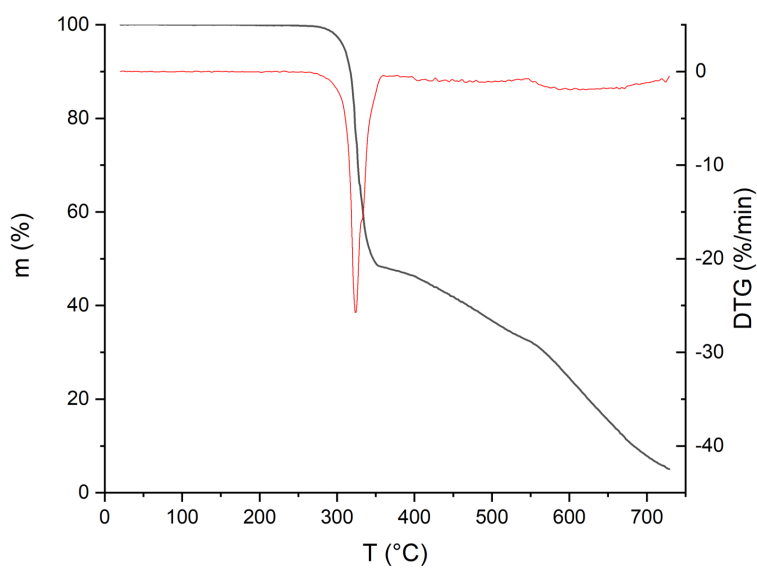

**Figure S13.** TG and DTA curves for the coordination polymer 2.

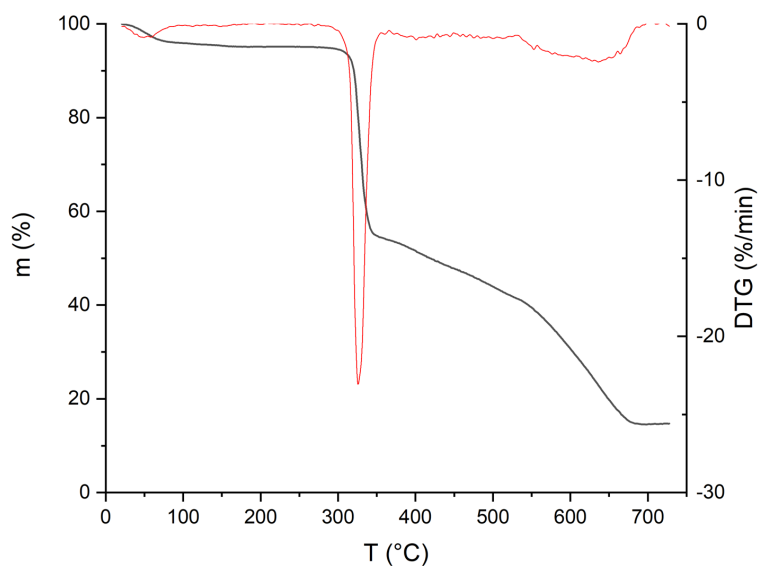

**Figure S14.** TG and DTA curves for the coordination polymer 3.

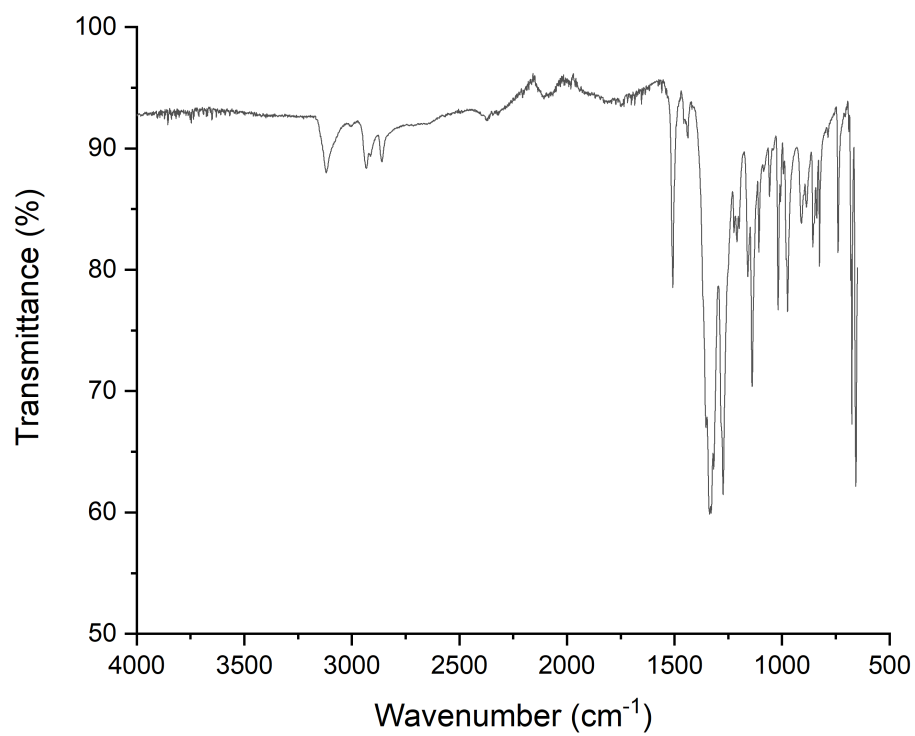

**Figure S15.** FT-IR spectrum of the coordination polymer **1**.

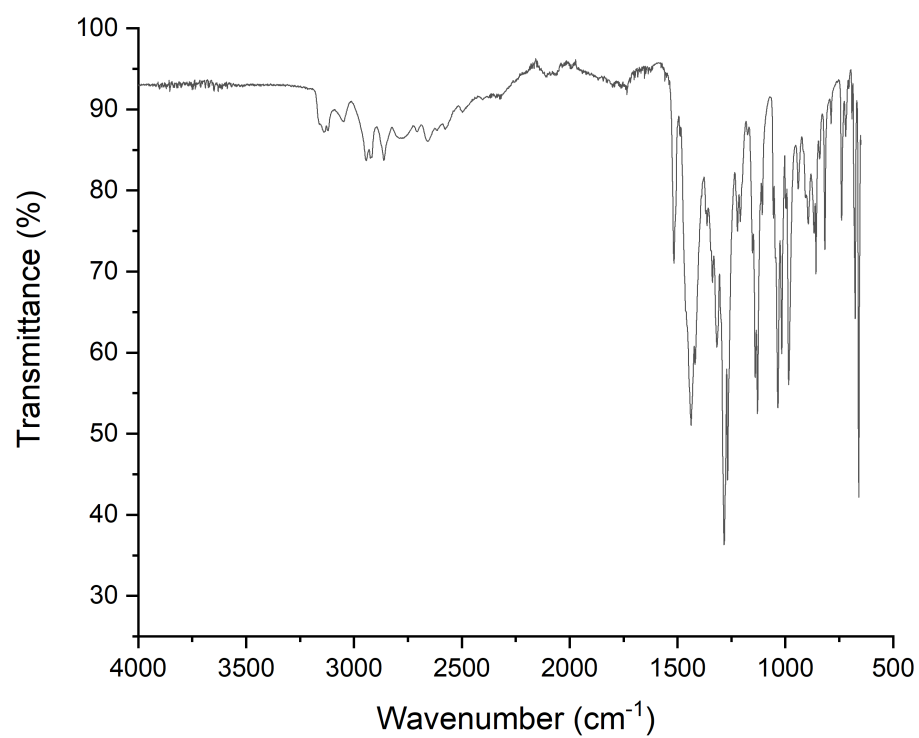

**Figure S16.** FT-IR spectrum of the coordination polymer **2**.

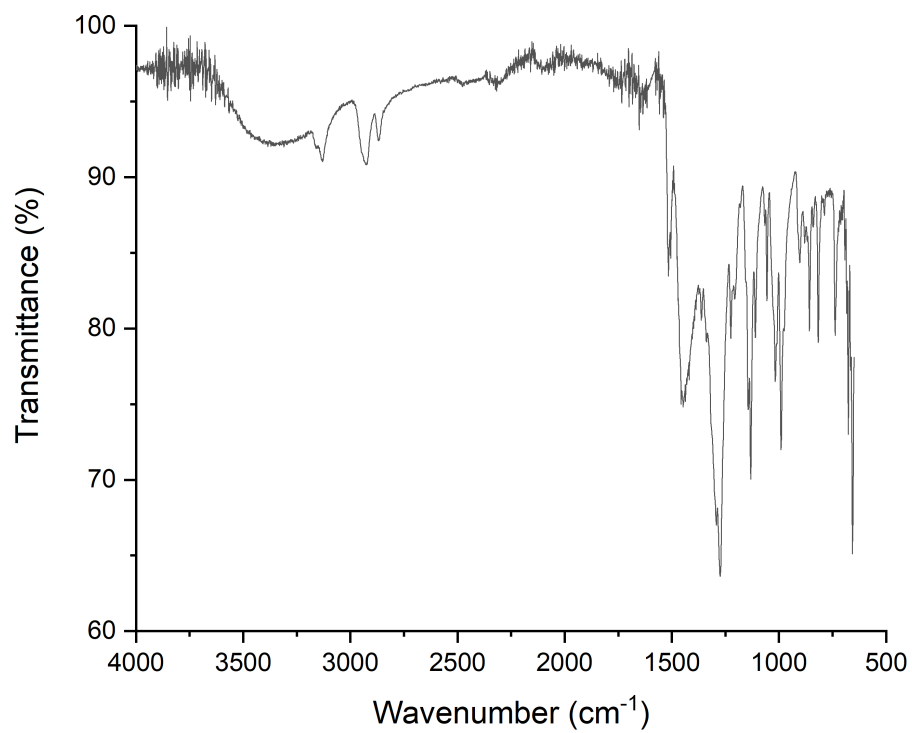

**Figure S17.** FT-IR spectrum of the coordination polymer **3**.

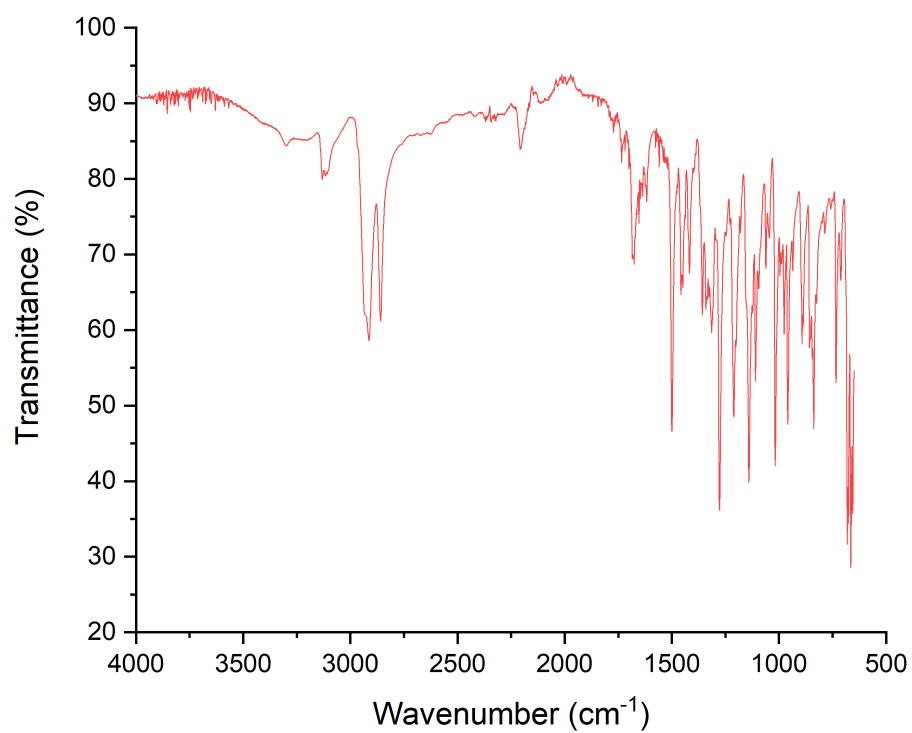

**Figure S18.** FT-IR spectrum of the ligand **L**.



**Table S1.** Interatomic distances, angles and geometrical criteria for nitrate coordination in compounds **1-3**.

|                                 |        |                                    |              |            |
|---------------------------------|--------|------------------------------------|--------------|------------|
| <b>Compound 1</b>               |        |                                    |              |            |
| d <sub>1</sub> (Ag1–O14), Å     | 2.640  | d <sub>2</sub> –d <sub>1</sub> , Å | 1.204 > 0.6  | unidentate |
| d <sub>2</sub> (Ag1–O15), Å     | 3.844  | A <sub>1</sub> –A <sub>2</sub> , ° | 61.46 > 28   |            |
| d <sub>3</sub> (Ag1–N18), Å     | 3.508  | d <sub>3</sub> –d <sub>2</sub> , Å | -0.336 < 0.1 |            |
| A <sub>1</sub> (Ag1–O14–N18), ° | 126.56 | A <sub>3</sub> , °                 | 123.92 < 162 |            |
| A <sub>2</sub> (Ag1–O15–N18), ° | 65.10  |                                    |              |            |
| A <sub>3</sub> (Ag1–N18–O16), ° | 123.92 |                                    |              |            |
| d <sub>1</sub> (Ag1–O11), Å     | 2.852  | d <sub>2</sub> –d <sub>1</sub> , Å | 1.105 > 0.6  | unidentate |
| d <sub>2</sub> (Ag1–O13), Å     | 3.957  | A <sub>1</sub> –A <sub>2</sub> , ° | 59.85 > 28   |            |
| d <sub>3</sub> (Ag1–N17), Å     | 3.827  | d <sub>3</sub> –d <sub>2</sub> , Å | -0.13 < 0.1  |            |
| A <sub>1</sub> (Ag1–O11–N17), ° | 134.77 | A <sub>3</sub> , °                 | 155.06 < 162 |            |
| A <sub>2</sub> (Ag1–O13–N17), ° | 74.92  |                                    |              |            |
| A <sub>3</sub> (Ag1–N17–O12), ° | 155.06 |                                    |              |            |
| <b>Compound 2</b>               |        |                                    |              |            |
| d <sub>1</sub> (Cd1–O12), Å     | 2.524  | d <sub>2</sub> –d <sub>1</sub> , Å | 0.103 < 0.3  | bidentate  |
| d <sub>2</sub> (Cd1–O11), Å     | 2.627  | A <sub>1</sub> –A <sub>2</sub> , ° | 4.87 < 14    |            |
| d <sub>3</sub> (Cd1–N3), Å      | 2.967  | d <sub>3</sub> –d <sub>2</sub> , Å | 0.34 > 0.2   |            |
| A <sub>1</sub> (Cd1–O12–N3), °  | 97.89  | A <sub>3</sub> , °                 | 171.84 > 168 |            |
| A <sub>2</sub> (Cd1–O11–N3), °  | 93.02  |                                    |              |            |
| A <sub>3</sub> (Cd1–N3–O13), °  | 171.84 |                                    |              |            |
| d <sub>1</sub> (Cd1–O21), Å     | 2.388  | d <sub>2</sub> –d <sub>1</sub> , Å | 0.860 > 0.6  | unidentate |
| d <sub>2</sub> (Cd1–O22), Å     | 3.248  | A <sub>1</sub> –A <sub>2</sub> , ° | 41.97 > 28   |            |
| d <sub>3</sub> (Cd1–N4), Å      | 3.220  | d <sub>3</sub> –d <sub>2</sub> , Å | -0.028 < 0.1 |            |
| A <sub>1</sub> (Cd1–O21–N4), °  | 119.67 | A <sub>3</sub> , °                 | 156.73 < 162 |            |
| A <sub>2</sub> (Cd1–O22–N4), °  | 77.70  |                                    |              |            |
| A <sub>3</sub> (Cd1–N4–O23), °  | 156.73 |                                    |              |            |
| <b>Compound 3</b>               |        |                                    |              |            |
| d <sub>1</sub> (Cd1–O11), Å     | 2.385  | d <sub>2</sub> –d <sub>1</sub> , Å | 0.217 < 0.3  | bidentate  |
| d <sub>2</sub> (Cd1–O12), Å     | 2.602  | A <sub>1</sub> –A <sub>2</sub> , ° | 11.50 < 14   |            |
| d <sub>3</sub> (Cd1–N51), Å     | 2.917  | d <sub>3</sub> –d <sub>2</sub> , Å | 0.315 > 0.2  |            |
| A <sub>1</sub> (Cd1–O11–N51), ° | 103.03 | A <sub>3</sub> , °                 | 175.74 > 168 |            |
| A <sub>2</sub> (Cd1–O12–N51), ° | 91.53  |                                    |              |            |
| A <sub>3</sub> (Cd1–N51–O13), ° | 175.74 |                                    |              |            |
| d <sub>1</sub> (Cd1–O15), Å     | 2.448  | d <sub>2</sub> –d <sub>1</sub> , Å | 0.052 < 0.3  | bidentate  |
| d <sub>2</sub> (Cd1–O14), Å     | 2.500  | A <sub>1</sub> –A <sub>2</sub> , ° | -2 < 14      |            |
| d <sub>3</sub> (Cd1–N52), Å     | 2.861  | d <sub>3</sub> –d <sub>2</sub> , Å | 0.361 > 0.2  |            |
| A <sub>1</sub> (Cd1–O14–N52), ° | 93.97  | A <sub>3</sub> , °                 | 176.72 > 168 |            |
| A <sub>2</sub> (Cd1–O15–N52), ° | 95.97  |                                    |              |            |
| A <sub>3</sub> (Cd1–N52–O16), ° | 176.72 |                                    |              |            |
| d <sub>1</sub> (Cd2–O22), Å     | 2.330  | d <sub>2</sub> –d <sub>1</sub> , Å | 0.178 < 0.3  | bidentate  |
| d <sub>2</sub> (Cd2–O21), Å     | 2.508  | A <sub>1</sub> –A <sub>2</sub> , ° | 7.99 < 14    |            |
| d <sub>3</sub> (Cd2–N72), Å     | 2.828  | d <sub>3</sub> –d <sub>2</sub> , Å | 0.320 > 0.2  |            |
| A <sub>1</sub> (Cd2–O22–N72), ° | 100.23 | A <sub>3</sub> , °                 | 172.38 > 168 |            |
| A <sub>2</sub> (Cd2–O21–N72), ° | 92.24  |                                    |              |            |
| A <sub>3</sub> (Cd2–N72–O23), ° | 172.38 |                                    |              |            |
| d <sub>1</sub> (Cd2–O25), Å     | 2.401  | d <sub>2</sub> –d <sub>1</sub> , Å | 0.035 < 0.3  | bidentate  |
| d <sub>2</sub> (Cd2–O24), Å     | 2.436  | A <sub>1</sub> –A <sub>2</sub> , ° | 0.95 < 14    |            |
| d <sub>3</sub> (Cd2–N71), Å     | 2.823  | d <sub>3</sub> –d <sub>2</sub> , Å | 0.387 > 0.2  |            |
| A <sub>1</sub> (Cd2–O25–N71), ° | 96.00  | A <sub>3</sub> , °                 | 173.48 > 168 |            |
| A <sub>2</sub> (Cd2–O24–N71), ° | 95.05  |                                    |              |            |
| A <sub>3</sub> (Cd2–N71–O26), ° | 173.48 |                                    |              |            |

**Table S2.** Continuous shape measures criteria for seven-coordinated cadmium centers in compounds **2** and **3**.

| Compound        | S(PBPY) | S(COC) | S(CTPR) |
|-----------------|---------|--------|---------|
| Cd1 in <b>2</b> | 1.279   | 7.553  | 5.924   |
| Cd1 in <b>3</b> | 3.927   | 7.726  | 6.245   |
| Cd2 in <b>3</b> | 2.570   | 8.910  | 7.211   |
