# Supplementary material for: Synthesis, Crystal Structure, and Luminescence of Cadmium(II) and Silver(I) Coordination Polymers Based on 1,3-Bis(1,2,4-triazol-1-yl)adamantane
Source: Molecules. 2021 Sep 5;26(17):5400. doi: 10.3390/molecules26175400 (PMC8434004; doi:10.3390/molecules26175400)
Supplement: Supplementary file 1 [file molecules-26-05400-s001.zip]

Archive with 8 entries (8 files):
- Compound1_CheckCIF.pdf
- Compound1.cif
- Compound2_CheckCIF.pdf
- Compound2.cif
- Compound3_CheckCIF.pdf
- Compound3.cif
- Tr2Adm_Cd_Ag_supporting.pdf
- __MACOSX/._Tr2Adm_Cd_Ag_supporting.pdf
