# Supplementary material for: Synthesis, Crystal Structure, and Luminescence of Cadmium(II) and Silver(I) Coordination Polymers Based on 1,3-Bis(1,2,4-triazol-1-yl)adamantane
Source: Molecules. 2021 Sep 5;26(17):5400. doi: 10.3390/molecules26175400 (PMC8434004; doi:10.3390/molecules26175400)
Supplement: Supplementary file 1 [file molecules-26-05400-s001.zip › Compound1.cif]

data_pot_ag011_1
_audit_creation_date               2021-03-29
_audit_creation_method
;
Olex2 1.2
(compiled 2018.05.29 svn.r3508 for OlexSys, GUI svn.r5506)
;
_shelx_SHELXL_version_number       '2017/1'
_audit_contact_author_address      ?
_audit_contact_author_email        ?
_audit_contact_author_name         ''
_audit_contact_author_phone        ?
_publ_contact_author_id_orcid      ?
_publ_section_references
;
Dolomanov, O.V., Bourhis, L.J., Gildea, R.J, Howard, J.A.K. & Puschmann, H.
 (2009), J. Appl. Cryst. 42, 339-341.

Sheldrick, G.M. (2015). Acta Cryst. A71, 3-8.

Sheldrick, G.M. (2015). Acta Cryst. C71, 3-8.
;
_chemical_name_common              ?
_chemical_name_systematic          ?
_chemical_formula_moiety           'C14 H18 Ag N7 O3'
_chemical_formula_sum              'C14 H18 Ag N7 O3'
_chemical_formula_weight           440.22
_chemical_melting_point            ?
loop_
  _atom_type_symbol
  _atom_type_description
  _atom_type_scat_dispersion_real
  _atom_type_scat_dispersion_imag
  _atom_type_scat_source
 'C' 'C' 0.0033 0.0016 'International Tables Vol C Tables 4.2.6.8 and 6.1.1.4'
 'H' 'H' 0.0000 0.0000 'International Tables Vol C Tables 4.2.6.8 and 6.1.1.4'
 'Ag' 'Ag' -0.8971 1.1015
 'International Tables Vol C Tables 4.2.6.8 and 6.1.1.4'
 'N' 'N' 0.0061 0.0033 'International Tables Vol C Tables 4.2.6.8 and 6.1.1.4'
 'O' 'O' 0.0106 0.0060 'International Tables Vol C Tables 4.2.6.8 and 6.1.1.4'

_shelx_space_group_comment
;
The symmetry employed for this shelxl refinement is uniquely defined
by the following loop, which should always be used as a source of
symmetry information in preference to the above space-group names.
They are only intended as comments.
;
_space_group_crystal_system        'monoclinic'
_space_group_IT_number             14
_space_group_name_H-M_alt          'P 1 21/c 1'
_space_group_name_Hall             '-P 2ybc'
loop_
  _space_group_symop_operation_xyz
 'x, y, z'
 '-x, y+1/2, -z+1/2'
 '-x, -y, -z'
 'x, -y-1/2, z-1/2'

_cell_length_a                     13.3900(4)
_cell_length_b                     9.7545(3)
_cell_length_c                     13.0518(4)
_cell_angle_alpha                  90
_cell_angle_beta                   110.4360(10)
_cell_angle_gamma                  90
_cell_volume                       1597.44(8)
_cell_formula_units_Z              4
_cell_measurement_reflns_used      4328
_cell_measurement_temperature      298(2)
_cell_measurement_theta_max        25.03
_cell_measurement_theta_min        2.64
_shelx_estimated_absorpt_T_max     0.938
_shelx_estimated_absorpt_T_min     0.850
_exptl_absorpt_coefficient_mu      1.294
_exptl_absorpt_correction_T_max    0.7452
_exptl_absorpt_correction_T_min    0.6876
_exptl_absorpt_correction_type     multi-scan
_exptl_absorpt_process_details    
 'SADABS-2012/1 (Bruker,2012) was used for absorption correction. wR2(int) was 0.0551 before and 0.0469 after correction. The Ratio of minimum to maximum transmission is 0.9227. The \l/2 correction factor is 0.0015.'
_exptl_absorpt_special_details     ?
_exptl_crystal_colour              colourless
_exptl_crystal_colour_primary      colourless
_exptl_crystal_density_diffrn      1.830
_exptl_crystal_density_meas        .
_exptl_crystal_density_method      ?
_exptl_crystal_description         prism
_exptl_crystal_F_000               888
_exptl_crystal_size_max            0.13
_exptl_crystal_size_mid            0.08
_exptl_crystal_size_min            0.05
_exptl_transmission_factor_max     ?
_exptl_transmission_factor_min     ?
_diffrn_reflns_av_R_equivalents    0.0390
_diffrn_reflns_av_unetI/netI       0.0298
_diffrn_reflns_Laue_measured_fraction_full  1.000
_diffrn_reflns_Laue_measured_fraction_max  1.000
_diffrn_reflns_limit_h_max         15
_diffrn_reflns_limit_h_min         -15
_diffrn_reflns_limit_k_max         11
_diffrn_reflns_limit_k_min         -11
_diffrn_reflns_limit_l_max         15
_diffrn_reflns_limit_l_min         -15
_diffrn_reflns_number              16302
_diffrn_reflns_point_group_measured_fraction_full  1.000
_diffrn_reflns_point_group_measured_fraction_max  1.000
_diffrn_reflns_theta_full          24.405
_diffrn_reflns_theta_max           24.405
_diffrn_reflns_theta_min           1.623
_diffrn_ambient_temperature        298(2)
_diffrn_detector                   CCD
_diffrn_detector_area_resol_mean   8.33
_diffrn_detector_type              'Bruker APEXII CCD area detector'
_diffrn_measured_fraction_theta_full  1.000
_diffrn_measured_fraction_theta_max  1.000
_diffrn_measurement_device         '\k-geometry diffractometer'
_diffrn_measurement_device_type    'Bruker APEX'
_diffrn_measurement_method         '\w and \f scans'
_diffrn_radiation_monochromator    graphite
_diffrn_radiation_type             MoK\a
_diffrn_radiation_wavelength       0.71073
_diffrn_source                     'sealed tube'
_diffrn_special_details            ?
_diffrn_standards_interval_count   .
_diffrn_standards_interval_time    .
_diffrn_standards_number           .
_reflns_Friedel_coverage           0.000
_reflns_Friedel_fraction_full      .
_reflns_Friedel_fraction_max       .
_reflns_number_gt                  1961
_reflns_number_total               2630
_reflns_special_details
;
 Reflections were merged by SHELXL according to the crystal
 class for the calculation of statistics and refinement.
 
 _reflns_Friedel_fraction is defined as the number of unique
 Friedel pairs measured divided by the number that would be
 possible theoretically, ignoring centric projections and
 systematic absences.
;
_reflns_threshold_expression       'I > 2\s(I)'
_computing_cell_refinement         'Bruker SAINT'
_computing_data_collection         'Bruker APEX2'
_computing_data_reduction          'Bruker SAINT'
_computing_molecular_graphics      'Olex2 (Dolomanov et al., 2009)'
_computing_publication_material    'Olex2 (Dolomanov et al., 2009)'
_computing_structure_refinement    'ShelXL (Sheldrick, 2015)'
_computing_structure_solution      'ShelXT (Sheldrick, 2015)'
_refine_diff_density_max           2.400
_refine_diff_density_min           -0.972
_refine_diff_density_rms           0.099
_refine_ls_extinction_coef         .
_refine_ls_extinction_method       none
_refine_ls_goodness_of_fit_ref     1.047
_refine_ls_hydrogen_treatment      constr
_refine_ls_matrix_type             full
_refine_ls_number_parameters       263
_refine_ls_number_reflns           2630
_refine_ls_number_restraints       50
_refine_ls_R_factor_all            0.0774
_refine_ls_R_factor_gt             0.0549
_refine_ls_restrained_S_all        1.055
_refine_ls_shift/su_max            0.000
_refine_ls_shift/su_mean           0.000
_refine_ls_structure_factor_coef   Fsqd
_refine_ls_weighting_details      
 'w=1/[\s^2^(Fo^2^)+(0.0659P)^2^+6.7149P] where P=(Fo^2^+2Fc^2^)/3'
_refine_ls_weighting_scheme        calc
_refine_ls_wR_factor_gt            0.1346
_refine_ls_wR_factor_ref           0.1478
_refine_special_details            ?
_olex2_refinement_description
;
1. Fixed Uiso
 At 1.2 times of:
  All C(H) groups, All C(H,H) groups
2. Restrained distances
 O16-N18 = O14-N18 = O15-N18
 1.25 with sigma of 0.02
 O11-N17 = O13-N17 = O12-N17
 1.25 with sigma of 0.02
 O14-O16
 2.16 with sigma of 0.04
 O16-O15
 2.16 with sigma of 0.04
 O14-O15
 2.16 with sigma of 0.04
 O11-O13
 2.16 with sigma of 0.04
 O13-O12
 2.16 with sigma of 0.04
 O11-O12
 2.16 with sigma of 0.04
3. Restrained planarity
 O14, O15, O16, N18
 with sigma of 0.1
 O11, O12, O13, N17
 with sigma of 0.1
4. Rigid body (RIGU) restrains
 O14, O15, O16, N18
 with sigma for 1-2 distances of 0.004 and sigma for 1-3 distances of 0.004
 O11, O12, O13, N17
 with sigma for 1-2 distances of 0.004 and sigma for 1-3 distances of 0.004
5. Others
 Sof(O11)=Sof(O12)=Sof(O13)=Sof(N17)=1-FVAR(1)
 Sof(O14)=Sof(O15)=Sof(O16)=Sof(N18)=FVAR(1)
6.a Ternary CH refined with riding coordinates:
 C7(H7), C8(H8)
6.b Secondary CH2 refined with riding coordinates:
 C4(H4A,H4B), C5(H5A,H5B), C6(H6A,H6B), C9(H9A,H9B), C10(H10A,H10B), C11(H11A,
 H11B)
6.c Aromatic/amide H refined with riding coordinates:
 C1(H1), C2(H2), C13(H13), C14(H14)
;
_atom_sites_solution_hydrogens     geom
_atom_sites_solution_primary       dual
_atom_sites_solution_secondary     ?
loop_
  _atom_site_label
  _atom_site_type_symbol
  _atom_site_fract_x
  _atom_site_fract_y
  _atom_site_fract_z
  _atom_site_U_iso_or_equiv
  _atom_site_adp_type
  _atom_site_occupancy
  _atom_site_site_symmetry_order
  _atom_site_calc_flag
  _atom_site_refinement_flags_posn
  _atom_site_refinement_flags_adp
  _atom_site_refinement_flags_occupancy
  _atom_site_disorder_assembly
  _atom_site_disorder_group
 Ag1 Ag 0.17786(4) 0.69018(7) 0.32379(5) 0.0676(3) Uani 1 1 d . . . . .
 N11 N 0.3530(4) 0.6987(7) 0.3904(5) 0.0538(15) Uani 1 1 d . . . . .
 N12 N 0.5143(5) 0.7921(8) 0.4652(6) 0.084(2) Uani 1 1 d . . . . .
 N13 N 0.5178(4) 0.6862(6) 0.3981(4) 0.0443(13) Uani 1 1 d . . . . .
 N14 N 1.0299(4) 0.6994(5) 0.7250(4) 0.0405(12) Uani 1 1 d . . . . .
 N15 N 0.9043(4) 0.5399(6) 0.6631(4) 0.0436(13) Uani 1 1 d . . . . .
 N16 N 0.8995(3) 0.6307(5) 0.5819(3) 0.0299(10) Uani 1 1 d . . . . .
 C1 C 0.4150(5) 0.7966(10) 0.4581(6) 0.071(2) Uani 1 1 d . . . . .
 H1 H 0.388720 0.860222 0.495345 0.085 Uiso 1 1 calc R . . . .
 C2 C 0.4206(5) 0.6358(8) 0.3533(6) 0.0501(17) Uani 1 1 d . . . . .
 H2 H 0.402252 0.565210 0.302225 0.060 Uiso 1 1 calc R . . . .
 C3 C 0.6170(4) 0.6522(7) 0.3785(5) 0.0373(14) Uani 1 1 d . . . . .
 C4 C 0.6377(5) 0.7564(7) 0.3020(5) 0.0443(15) Uani 1 1 d . . . . .
 H4A H 0.641800 0.847702 0.332650 0.053 Uiso 1 1 calc R . . . .
 H4B H 0.579859 0.754904 0.231985 0.053 Uiso 1 1 calc R . . . .
 C5 C 0.6111(5) 0.5085(7) 0.3308(5) 0.0456(16) Uani 1 1 d . . . . .
 H5A H 0.552739 0.503413 0.261267 0.055 Uiso 1 1 calc R . . . .
 H5B H 0.598034 0.442103 0.380020 0.055 Uiso 1 1 calc R . . . .
 C6 C 0.7083(4) 0.6574(6) 0.4894(4) 0.0311(13) Uani 1 1 d . . . . .
 H6A H 0.695128 0.592241 0.539355 0.037 Uiso 1 1 calc R . . . .
 H6B H 0.712841 0.748300 0.520803 0.037 Uiso 1 1 calc R . . . .
 C7 C 0.7161(5) 0.4757(7) 0.3146(5) 0.0496(17) Uani 1 1 d . . . . .
 H7 H 0.711815 0.383612 0.283244 0.060 Uiso 1 1 calc R . . . .
 C8 C 0.7432(5) 0.7210(8) 0.2862(5) 0.0530(19) Uani 1 1 d . . . . .
 H8 H 0.756112 0.787978 0.236313 0.064 Uiso 1 1 calc R . . . .
 C9 C 0.7365(6) 0.5794(9) 0.2368(5) 0.063(2) Uani 1 1 d . . . . .
 H9A H 0.802651 0.557705 0.225638 0.076 Uiso 1 1 calc R . . . .
 H9B H 0.679079 0.576190 0.166526 0.076 Uiso 1 1 calc R . . . .
 C10 C 0.8357(5) 0.7275(7) 0.3966(5) 0.0450(16) Uani 1 1 d . . . . .
 H10A H 0.902562 0.706747 0.386585 0.054 Uiso 1 1 calc R . . . .
 H10B H 0.840645 0.818689 0.427683 0.054 Uiso 1 1 calc R . . . .
 C11 C 0.8075(5) 0.4799(7) 0.4249(5) 0.0459(16) Uani 1 1 d . . . . .
 H11A H 0.795213 0.413003 0.474244 0.055 Uiso 1 1 calc R . . . .
 H11B H 0.874214 0.457681 0.415154 0.055 Uiso 1 1 calc R . . . .
 C12 C 0.8135(4) 0.6221(6) 0.4727(4) 0.0311(13) Uani 1 1 d . . . . .
 C13 C 0.9748(4) 0.7247(6) 0.6213(5) 0.0363(14) Uani 1 1 d . . . . .
 H13 H 0.986990 0.797917 0.581579 0.044 Uiso 1 1 calc R . . . .
 C14 C 0.9836(4) 0.5870(7) 0.7472(5) 0.0436(16) Uani 1 1 d . . . . .
 H14 H 1.005595 0.546018 0.815888 0.052 Uiso 1 1 calc R . . . .
 O14 O 0.1638(14) 0.5664(17) 0.1394(12) 0.096(5) Uani 0.531(14) 1 d D U P A 1
 O15 O 0.3000(11) 0.607(2) 0.1047(14) 0.146(8) Uani 0.531(14) 1 d D U P A 1
 O16 O 0.1439(14) 0.648(2) -0.0141(12) 0.148(10) Uani 0.531(14) 1 d D U P A 1
 N18 N 0.2021(12) 0.6059(18) 0.0722(12) 0.061(5) Uani 0.531(14) 1 d D U P A 1
 O11 O 0.2283(19) 0.606(3) 0.1383(16) 0.146(11) Uani 0.469(14) 1 d D U P A 2
 O12 O 0.2132(12) 0.5331(18) -0.0198(11) 0.093(5) Uani 0.469(14) 1 d D U P A 2
 O13 O 0.0771(12) 0.563(2) 0.0166(16) 0.140(9) Uani 0.469(14) 1 d D U P A 2
 N17 N 0.1754(14) 0.5756(19) 0.0425(14) 0.057(5) Uani 0.469(14) 1 d D U P A 2

loop_
  _atom_site_aniso_label
  _atom_site_aniso_U_11
  _atom_site_aniso_U_22
  _atom_site_aniso_U_33
  _atom_site_aniso_U_23
  _atom_site_aniso_U_13
  _atom_site_aniso_U_12
 Ag1 0.0263(3) 0.0911(5) 0.0745(4) 0.0234(3) 0.0036(3) 0.0061(3)
 N11 0.027(3) 0.078(4) 0.050(3) 0.016(3) 0.006(2) 0.008(3)
 N12 0.035(3) 0.123(7) 0.088(5) -0.054(5) 0.013(3) 0.003(4)
 N13 0.025(3) 0.062(4) 0.037(3) -0.009(3) 0.000(2) 0.002(2)
 N14 0.026(2) 0.050(3) 0.040(3) -0.006(2) 0.005(2) -0.003(2)
 N15 0.035(3) 0.048(3) 0.039(3) 0.011(2) 0.002(2) -0.005(2)
 N16 0.019(2) 0.035(3) 0.032(2) 0.006(2) 0.0038(18) 0.005(2)
 C1 0.029(4) 0.113(7) 0.065(5) -0.025(5) 0.010(3) 0.010(4)
 C2 0.030(3) 0.058(4) 0.054(4) -0.001(3) 0.003(3) -0.002(3)
 C3 0.026(3) 0.054(4) 0.029(3) -0.003(3) 0.007(2) 0.004(3)
 C4 0.037(3) 0.052(4) 0.033(3) 0.004(3) -0.002(3) 0.006(3)
 C5 0.042(3) 0.050(4) 0.034(3) -0.008(3) -0.001(3) -0.010(3)
 C6 0.023(3) 0.036(3) 0.030(3) -0.001(2) 0.003(2) 0.000(2)
 C7 0.055(4) 0.049(4) 0.038(3) -0.014(3) 0.008(3) 0.007(3)
 C8 0.048(4) 0.074(5) 0.034(3) 0.015(3) 0.009(3) -0.005(3)
 C9 0.054(4) 0.105(7) 0.029(3) -0.007(4) 0.010(3) 0.015(4)
 C10 0.036(3) 0.059(5) 0.040(3) 0.007(3) 0.014(3) 0.000(3)
 C11 0.044(3) 0.051(4) 0.039(3) -0.005(3) 0.010(3) 0.012(3)
 C12 0.024(3) 0.039(3) 0.028(3) 0.002(3) 0.005(2) 0.002(2)
 C13 0.028(3) 0.039(4) 0.040(3) -0.002(3) 0.009(3) -0.005(3)
 C14 0.032(3) 0.060(5) 0.030(3) 0.003(3) -0.001(3) 0.002(3)
 O14 0.133(13) 0.090(10) 0.096(10) 0.003(7) 0.081(10) -0.004(9)
 O15 0.083(7) 0.24(2) 0.129(13) 0.049(14) 0.049(8) -0.005(11)
 O16 0.154(14) 0.155(16) 0.080(8) 0.066(10) -0.026(9) -0.091(12)
 N18 0.077(7) 0.062(13) 0.045(8) -0.011(8) 0.024(6) -0.021(8)
 O11 0.142(19) 0.20(3) 0.070(11) -0.061(15) 0.002(11) 0.008(19)
 O12 0.112(11) 0.117(13) 0.068(8) -0.011(8) 0.055(8) 0.003(9)
 O13 0.091(8) 0.19(2) 0.133(15) -0.051(14) 0.035(9) 0.021(11)
 N17 0.087(9) 0.031(9) 0.055(9) -0.006(8) 0.028(7) -0.008(9)

_geom_special_details
;
 All esds (except the esd in the dihedral angle between two l.s. planes)
 are estimated using the full covariance matrix.  The cell esds are taken
 into account individually in the estimation of esds in distances, angles
 and torsion angles; correlations between esds in cell parameters are only
 used when they are defined by crystal symmetry.  An approximate (isotropic)
 treatment of cell esds is used for estimating esds involving l.s. planes.
;
loop_
  _geom_bond_atom_site_label_1
  _geom_bond_atom_site_label_2
  _geom_bond_distance
  _geom_bond_site_symmetry_2
  _geom_bond_publ_flag
 Ag1 N11 2.200(5) . ?
 Ag1 N14 2.228(5) 4_475 ?
 Ag1 N15 2.531(5) 3_666 ?
 Ag1 O14 2.640(15) . ?
 Ag1 O11 2.85(2) . ?
 N11 C1 1.367(10) . ?
 N11 C2 1.317(9) . ?
 N12 N13 1.365(8) . ?
 N12 C1 1.301(9) . ?
 N13 C2 1.321(8) . ?
 N13 C3 1.476(7) . ?
 N14 C13 1.319(8) . ?
 N14 C14 1.339(8) . ?
 N15 N16 1.366(7) . ?
 N15 C14 1.315(7) . ?
 N16 C12 1.490(7) . ?
 N16 C13 1.327(7) . ?
 C3 C4 1.517(9) . ?
 C3 C5 1.525(9) . ?
 C3 C6 1.535(7) . ?
 C4 C8 1.536(9) . ?
 C5 C7 1.527(9) . ?
 C6 C12 1.537(7) . ?
 C7 C9 1.524(11) . ?
 C7 C11 1.531(8) . ?
 C8 C9 1.514(11) . ?
 C8 C10 1.539(9) . ?
 C10 C12 1.529(8) . ?
 C11 C12 1.511(9) . ?
 O14 N18 1.222(15) . ?
 O15 N18 1.229(15) . ?
 O16 N18 1.196(15) . ?
 O11 N17 1.238(16) . ?
 O12 N17 1.174(15) . ?
 O13 N17 1.246(16) . ?

loop_
  _geom_angle_atom_site_label_1
  _geom_angle_atom_site_label_2
  _geom_angle_atom_site_label_3
  _geom_angle
  _geom_angle_site_symmetry_1
  _geom_angle_site_symmetry_3
  _geom_angle_publ_flag
 N11 Ag1 N14 145.1(2) . 4_475 ?
 N11 Ag1 N15 115.8(2) . 3_666 ?
 N11 Ag1 O14 96.0(4) . . ?
 N11 Ag1 O11 79.1(5) . . ?
 N14 Ag1 N15 98.51(17) 4_475 3_666 ?
 N14 Ag1 O14 85.8(4) 4_475 . ?
 N14 Ag1 O11 94.3(5) 4_475 . ?
 N15 Ag1 O14 76.2(3) 3_666 . ?
 N15 Ag1 O11 92.3(6) 3_666 . ?
 C1 N11 Ag1 127.2(5) . . ?
 C2 N11 Ag1 127.7(5) . . ?
 C2 N11 C1 102.9(5) . . ?
 C1 N12 N13 104.0(6) . . ?
 N12 N13 C3 121.0(5) . . ?
 C2 N13 N12 108.5(5) . . ?
 C2 N13 C3 130.3(6) . . ?
 C13 N14 Ag1 124.6(4) . 4_676 ?
 C13 N14 C14 103.9(5) . . ?
 C14 N14 Ag1 130.9(4) . 4_676 ?
 N16 N15 Ag1 136.3(4) . 3_666 ?
 C14 N15 Ag1 119.8(4) . 3_666 ?
 C14 N15 N16 103.1(5) . . ?
 N15 N16 C12 121.2(4) . . ?
 C13 N16 N15 108.9(4) . . ?
 C13 N16 C12 129.7(5) . . ?
 N12 C1 N11 113.4(7) . . ?
 N11 C2 N13 111.1(6) . . ?
 N13 C3 C4 110.3(5) . . ?
 N13 C3 C5 110.9(5) . . ?
 N13 C3 C6 107.4(4) . . ?
 C4 C3 C5 110.0(5) . . ?
 C4 C3 C6 109.2(5) . . ?
 C5 C3 C6 109.0(5) . . ?
 C3 C4 C8 109.0(5) . . ?
 C3 C5 C7 109.3(5) . . ?
 C3 C6 C12 109.1(4) . . ?
 C5 C7 C11 109.7(5) . . ?
 C9 C7 C5 110.0(6) . . ?
 C9 C7 C11 109.8(6) . . ?
 C4 C8 C10 110.1(5) . . ?
 C9 C8 C4 110.0(6) . . ?
 C9 C8 C10 110.2(6) . . ?
 C8 C9 C7 108.6(5) . . ?
 C12 C10 C8 107.7(5) . . ?
 C12 C11 C7 108.8(5) . . ?
 N16 C12 C6 107.0(4) . . ?
 N16 C12 C10 108.8(4) . . ?
 N16 C12 C11 111.0(5) . . ?
 C10 C12 C6 109.7(5) . . ?
 C11 C12 C6 110.2(5) . . ?
 C11 C12 C10 110.1(5) . . ?
 N14 C13 N16 110.2(5) . . ?
 N15 C14 N14 113.9(5) . . ?
 N18 O14 Ag1 126.6(13) . . ?
 O14 N18 O15 114.8(17) . . ?
 O16 N18 O14 119.0(18) . . ?
 O16 N18 O15 126.0(17) . . ?
 N17 O11 Ag1 134.8(18) . . ?
 O11 N17 O13 118.4(19) . . ?
 O12 N17 O11 123(2) . . ?
 O12 N17 O13 116.5(17) . . ?

_shelx_res_file
;
TITL pot_ag011_1_a.res in P2(1)/c
    pot_ag011_1.res
    created by SHELXL-2017/1 at 21:33:13 on 29-Mar-2021
REM Old TITL Pot_Ag011_1 in P2(1)/c
REM SHELXT solution in P2(1)/c
REM R1 0.259, Rweak 0.015, Alpha 0.044, Orientation as input
REM Formula found by SHELXT: C21 N4 Ag
CELL 0.71073 13.39 9.7545 13.0518 90 110.436 90
ZERR 4 0.0004 0.0003 0.0004 0 0.001 0
LATT 1
SYMM -X,0.5+Y,0.5-Z
SFAC C H Ag N O
UNIT 56 72 4 28 12
DFIX 1.25 O16 N18 O14 N18 O15 N18
DFIX 1.25 O11 N17 O13 N17 O12 N17
DANG 2.16 O14 O16
DANG 2.16 O16 O15
DANG 2.16 O14 O15
DANG 2.16 O11 O13
DANG 2.16 O13 O12
DANG 2.16 O11 O12
FLAT O14 O15 O16 N18
FLAT O11 O12 O13 N17
RIGU O14 > N18
RIGU O11 > N17

L.S. 10
PLAN  20
SIZE 0.05 0.08 0.13
TEMP 25(2)
BIND O11 Ag1
BIND O14 Ag1
list 4
fmap 2
acta
SHEL 999 0.86
REM <olex2.extras>
REM <HklSrc "%.\\Pot_Ag011_1.hkl">
REM </olex2.extras>

WGHT    0.065900    6.714900
FVAR       0.47800   0.53143
AG1   3    0.177855    0.690177    0.323785    11.00000    0.02628    0.09107 =
         0.07450    0.02345    0.00364    0.00613
N11   4    0.353049    0.698708    0.390424    11.00000    0.02699    0.07832 =
         0.04976    0.01562    0.00557    0.00794
N12   4    0.514330    0.792100    0.465238    11.00000    0.03497    0.12271 =
         0.08808   -0.05406    0.01300    0.00304
N13   4    0.517753    0.686231    0.398102    11.00000    0.02521    0.06215 =
         0.03708   -0.00882    0.00007    0.00237
N14   4    1.029858    0.699360    0.725021    11.00000    0.02587    0.04997 =
         0.04026   -0.00649    0.00489   -0.00331
N15   4    0.904311    0.539880    0.663125    11.00000    0.03492    0.04786 =
         0.03924    0.01096    0.00198   -0.00510
N16   4    0.899452    0.630710    0.581882    11.00000    0.01899    0.03515 =
         0.03167    0.00593    0.00378    0.00461
C1    1    0.414997    0.796612    0.458079    11.00000    0.02918    0.11332 =
         0.06536   -0.02533    0.01015    0.01025
AFIX  43
H1    2    0.388720    0.860222    0.495345    11.00000   -1.20000
AFIX   0
C2    1    0.420575    0.635835    0.353296    11.00000    0.02981    0.05755 =
         0.05404   -0.00148    0.00328   -0.00190
AFIX  43
H2    2    0.402252    0.565210    0.302225    11.00000   -1.20000
AFIX   0
C3    1    0.616961    0.652225    0.378505    11.00000    0.02608    0.05416 =
         0.02938   -0.00285    0.00667    0.00371
C4    1    0.637730    0.756415    0.301979    11.00000    0.03687    0.05166 =
         0.03306    0.00371   -0.00206    0.00588
AFIX  23
H4A   2    0.641800    0.847702    0.332650    11.00000   -1.20000
H4B   2    0.579859    0.754904    0.231985    11.00000   -1.20000
AFIX   0
C5    1    0.611061    0.508495    0.330793    11.00000    0.04172    0.04960 =
         0.03402   -0.00796   -0.00118   -0.00969
AFIX  23
H5A   2    0.552739    0.503413    0.261267    11.00000   -1.20000
H5B   2    0.598034    0.442103    0.380020    11.00000   -1.20000
AFIX   0
C6    1    0.708336    0.657387    0.489390    11.00000    0.02273    0.03552 =
         0.03047   -0.00108    0.00341   -0.00015
AFIX  23
H6A   2    0.695128    0.592241    0.539355    11.00000   -1.20000
H6B   2    0.712841    0.748300    0.520803    11.00000   -1.20000
AFIX   0
C7    1    0.716053    0.475662    0.314569    11.00000    0.05483    0.04910 =
         0.03802   -0.01438    0.00759    0.00715
AFIX  13
H7    2    0.711815    0.383612    0.283244    11.00000   -1.20000
AFIX   0
C8    1    0.743179    0.720982    0.286235    11.00000    0.04755    0.07417 =
         0.03362    0.01492    0.00946   -0.00468
AFIX  13
H8    2    0.756112    0.787978    0.236313    11.00000   -1.20000
AFIX   0
C9    1    0.736489    0.579355    0.236808    11.00000    0.05377    0.10455 =
         0.02872   -0.00687    0.01039    0.01476
AFIX  23
H9A   2    0.802651    0.557705    0.225638    11.00000   -1.20000
H9B   2    0.679079    0.576190    0.166526    11.00000   -1.20000
AFIX   0
C10   1    0.835713    0.727545    0.396577    11.00000    0.03611    0.05910 =
         0.04046    0.00702    0.01425    0.00003
AFIX  23
H10A  2    0.902562    0.706747    0.386585    11.00000   -1.20000
H10B  2    0.840645    0.818689    0.427683    11.00000   -1.20000
AFIX   0
C11   1    0.807501    0.479897    0.424939    11.00000    0.04383    0.05135 =
         0.03886   -0.00547    0.00969    0.01196
AFIX  23
H11A  2    0.795213    0.413003    0.474244    11.00000   -1.20000
H11B  2    0.874214    0.457681    0.415154    11.00000   -1.20000
AFIX   0
C12   1    0.813457    0.622112    0.472660    11.00000    0.02380    0.03863 =
         0.02753    0.00173    0.00490    0.00155
C13   1    0.974782    0.724711    0.621321    11.00000    0.02771    0.03883 =
         0.04025   -0.00154    0.00927   -0.00465
AFIX  43
H13   2    0.986990    0.797917    0.581579    11.00000   -1.20000
AFIX   0
C14   1    0.983623    0.586990    0.747244    11.00000    0.03209    0.05997 =
         0.02966    0.00251   -0.00064    0.00169
AFIX  43
H14   2    1.005595    0.546018    0.815888    11.00000   -1.20000
AFIX   0
PART 1
O14   5    0.163754    0.566435    0.139363    21.00000    0.13297    0.09019 =
         0.09640    0.00340    0.08121   -0.00378
O15   5    0.300011    0.606982    0.104706    21.00000    0.08327    0.23572 =
         0.12873    0.04883    0.04891   -0.00524
O16   5    0.143891    0.647847   -0.014085    21.00000    0.15427    0.15528 =
         0.08023    0.06552   -0.02616   -0.09050
N18   4    0.202089    0.605873    0.072212    21.00000    0.07712    0.06199 =
         0.04543   -0.01148    0.02390   -0.02109
PART 0
PART 2
O11   5    0.228261    0.605970    0.138260   -21.00000    0.14249    0.19757 =
         0.06998   -0.06075    0.00213    0.00793
O12   5    0.213244    0.533117   -0.019826   -21.00000    0.11165    0.11692 =
         0.06844   -0.01075    0.05458    0.00299
O13   5    0.077117    0.562694    0.016550   -21.00000    0.09086    0.19215 =
         0.13307   -0.05144    0.03468    0.02103
N17   4    0.175425    0.575641    0.042535   -21.00000    0.08724    0.03148 =
         0.05532   -0.00605    0.02844   -0.00788
HKLF 4


REM  pot_ag011_1_a.res in P2(1)/c
REM R1 =  0.0549 for    1961 Fo > 4sig(Fo)  and  0.0774 for all    2630 data
REM    263 parameters refined using     50 restraints

END

WGHT      0.0659      6.7144

REM Highest difference peak  2.400,  deepest hole -0.972,  1-sigma level  0.099
Q1    1   0.1967  0.7927  0.3505  11.00000  0.05    2.40
Q2    1   0.1862  0.6850  0.2542  11.00000  0.05    0.68
Q3    1   0.2062  0.6185 -0.0211  11.00000  0.05    0.55
Q4    1   0.1631  0.5478 -0.0228  11.00000  0.05    0.44
Q5    1   0.2571  0.5318  0.0318  11.00000  0.05    0.42
Q6    1   0.4421  0.7038  0.4996  11.00000  0.05    0.36
Q7    1   0.2231  0.5479  0.1373  11.00000  0.05    0.34
Q8    1   0.1344  0.6869  0.3262  11.00000  0.05    0.34
Q9    1   0.1461  0.6196  0.0974  11.00000  0.05    0.32
Q10   1   0.8617  0.6365  0.5310  11.00000  0.05    0.30
Q11   1   0.6577  0.6615  0.4349  11.00000  0.05    0.30
Q12   1   0.9135  0.5587  0.5959  11.00000  0.05    0.25
Q13   1   0.7658  0.6441  0.4799  11.00000  0.05    0.24
Q14   1   0.0004  0.5629  0.0013  11.00000  0.05    0.24
Q15   1   0.7250  0.6529  0.2740  11.00000  0.05    0.22
Q16   1   0.5629  0.8468  0.2309  11.00000  0.05    0.22
Q17   1   1.0258  0.7230  0.7833  11.00000  0.05    0.21
Q18   1   0.7862  0.7238  0.3364  11.00000  0.05    0.21
Q19   1   0.9785  0.9337  0.5987  11.00000  0.05    0.21
Q20   1   0.4196  0.9733  0.5721  11.00000  0.05    0.21
;
_shelx_res_checksum                79821
_shelx_hkl_file
;
   0   0   1   -1.20    1.00
   0   0   1    1.40    1.10
   0   0  -1   -1.10    0.30
   0   0  -1   -0.80    0.90
   0   0  -2  964.50   23.80
   0   0  -2  919.11   24.70
   0   0   2  983.10   25.40
   0   0   2  930.01   23.80
   0   0   2  919.71   24.60
   0   0  -3    0.50    3.90
   0   0  -3    2.00    2.60
   0   0  -3    2.10    4.70
   0   0   3    2.80    5.30
   0   0   3    5.80    3.90
   0   0   3    0.50    2.40
   0   0  -4  451.25   15.30
   0   0  -4  426.36   13.10
   0   0  -4  430.46   16.80
   0   0   4  461.95   15.10
   0   0   4  445.06   17.10
   0   0  -5    0.70    2.90
   0   0   5    3.90    6.00
   0   0   5   -1.10    2.90
   0   0  -5   10.40    6.00
   0   0  -5    1.60    4.50
   0   0   6 1394.86   42.70
   0   0   6 1469.85   40.60
   0   0  -6 1452.25   40.80
   0   0  -6 1458.85   37.80
   0   0   7    2.20    7.60
   0   0   7    9.90    5.30
   0   0  -7    7.00    3.60
   0   0  -7    8.80    5.70
   0   0   8  160.68   12.00
   0   0   8  148.09   13.90
   0   0  -8  163.78    8.40
   0   0  -8  156.88   12.70
   0   0   9    0.70    9.60
   0   0  -9   -4.80    3.70
   0   0   9    6.30    6.50
   0   0  -9   -5.10    6.50
   0   0 -10   34.40    4.70
   0   0  10   16.40   11.70
   0   0 -10   11.90    8.30
   0   0  11   -9.40   10.60
   0   0 -11    7.10    8.30
   0   0 -12  125.69   14.00
   0   0  12  151.78   19.30
   0   0 -13   -8.50    7.80
   0   0  13   -8.20   12.80
   0   0 -14  103.99   14.40
   0   0  14   85.09   18.00
   0   1   0   -3.80    1.80
   0   1   0   -6.20    1.70
   0  -1   0   -3.10    1.70
   0  -1   0   -2.90    2.10
   0   1  -1 1117.79   29.70
   0   1   1 1142.09   29.70
   0   1   1 1138.89   29.20
   0   1  -1 1135.89   28.30
   0   1   1 1104.79   29.80
   0  -1   1 1110.49   29.10
   0  -1   1 1150.48   28.30
   0  -1   1 1141.09   29.80
   0  -1  -1 1158.88   29.70
   0   1  -2 7601.34  184.48
   0   1   2 7333.27  185.38
   0   1   2 7703.33  189.58
   0  -1  -2 7687.63  188.08
   0  -1   2 7395.26  184.18
   0  -1   2 7686.63  184.18
   0  -1   2 7347.36  181.18
   0  -1  -2 7552.64  185.18
   0   1  -3 3704.33   94.09
   0   1  -3 3896.31   94.99
   0   1   3 3896.01   94.49
   0   1   3 3879.51   96.29
   0  -1   3 3795.52   95.09
   0  -1  -3 3772.12   96.29
   0  -1   3 3772.02   93.99
   0  -1  -3 3925.81   94.59
   0   1   4 2155.78   53.09
   0   1  -4 2056.29   53.39
   0   1  -4 2112.99   55.59
   0  -1  -4 2127.29   53.09
   0  -1  -4 2054.19   56.79
   0  -1   4 2090.89   55.59
   0  -1   4 2130.69   53.39
   0  -1  -4 2046.70   55.59
   0   1   5  154.48    7.20
   0   1  -5  157.38   11.50
   0   1  -5  153.98    8.30
   0   1   5  148.59   10.30
   0   1   5  166.48   12.10
   0   1  -5  147.69    8.70
   0  -1   5  142.79   11.20
   0  -1   5  143.09    8.00
   0  -1  -5  129.59   10.80
   0  -1  -5  149.59    7.50
   0   1   6  312.07   16.90
   0   1   6  277.27   13.90
   0   1  -6  314.87   16.10
   0   1  -6  251.17   12.30
   0   1  -6  285.07   11.60
   0   1   6  295.37   10.50
   0  -1  -6  325.57   11.10
   0  -1  -6  269.87   14.80
   0  -1   6  283.57   11.80
   0  -1   6  294.17   16.30
   0   1  -7   11.50    5.40
   0   1  -7   11.90    4.00
   0   1   7    1.00    7.90
   0   1  -7   17.90    7.60
   0   1   7    4.40    3.30
   0   1   7   10.70    5.90
   0  -1   7   -0.40    7.70
   0  -1   7    7.00    4.60
   0  -1  -7    6.70    6.50
   0  -1  -7   15.50    4.00
   0   1  -8  419.36   15.50
   0   1   8  433.96   22.70
   0   1   8  482.65   20.20
   0   1   8  429.36   14.10
   0   1  -8  455.75   22.40
   0   1  -8  431.46   17.90
   0  -1   8  498.25   17.80
   0  -1  -8  458.35   20.60
   0  -1  -8  438.56   14.70
   0  -1   8  408.76   22.50
   0   1  -9   78.29    9.30
   0   1   9   57.19   11.80
   0   1  -9   73.29    6.80
   0  -1   9  106.59   14.00
   0  -1  -9   96.39    7.30
   0  -1   9   67.09    8.40
   0  -1  -9   70.19   10.60
   0   1 -10  126.69    9.10
   0   1 -10  103.99   10.90
   0   1  10  100.09   14.80
   0  -1  10  116.49   15.70
   0  -1 -10  106.59   13.00
   0   1 -11  133.89    9.00
   0   1  11  144.29   17.50
   0   1 -11  129.79   12.90
   0  -1 -11  145.09   15.20
   0  -1  11  118.89   16.50
   0   1  12  256.07   23.50
   0   1 -12  228.38   16.90
   0  -1 -12  237.18   19.10
   0  -1  12  262.77   24.00
   0   1  13   -5.40   12.20
   0   1 -13   -5.70    7.70
   0  -1 -13    4.00    9.70
   0  -1  13   -8.30   12.50
   0   1  14   -1.70   12.90
   0   1 -14   -6.70    8.70
   0  -1 -14   -4.40    9.70
   0  -1  14   13.00   14.40
   0   2   0 6253.87  150.38
   0   2   0 5889.31  151.58
   0  -2   0 6202.18  150.28
   0  -2   0 6157.68  151.78
   0   2  -1 3766.72   92.89
   0   2  -1 3777.02   90.99
   0   2   1 3736.53   92.29
   0   2   1 3728.43   93.29
   0  -2  -1 3702.03   92.29
   0  -2   1 3776.52   92.89
   0  -2  -1 3301.17   92.79
   0  -2   1 3624.54   90.79
   0   2  -2  376.06   14.70
   0   2  -2  351.16   11.50
   0   2   2  371.26   15.80
   0   2   2  389.46   15.00
   0   2   2  382.96   14.00
   0  -2  -2  359.76   14.80
   0  -2   2  346.07   11.20
   0  -2   2  362.66   11.50
   0   2   3  195.48   11.50
   0   2   3  185.38   12.60
   0   2   3  186.48   10.10
   0   2  -3  204.58    7.70
   0  -2   3  164.28   11.40
   0  -2   3  195.78    7.50
   0  -2   3  197.48    7.60
   0  -2  -3  190.98   11.70
   0   2  -4  291.77   10.00
   0   2   4  244.88   11.20
   0   2   4  233.58   14.80
   0  -2   4  285.67   14.20
   0  -2   4  282.17    9.50
   0  -2  -4  257.57   13.80
   0  -2   4  285.97    9.60
   0   2   5 1342.67   36.30
   0   2  -5 1364.26   35.60
   0   2  -5 1347.47   39.60
   0   2   5 1356.26   39.40
   0  -2   5 1324.27   35.20
   0  -2   5 1319.27   39.70
   0  -2  -5 1343.17   36.40
   0  -2  -5 1342.57   40.80
   0  -2   5 1319.97   35.10
   0  -2  -5 1284.77   39.50
   0   2  -6  205.88   10.00
   0   2   6  192.78    9.80
   0   2  -6  218.28   14.40
   0   2   6  230.58   13.60
   0  -2  -6  200.78   15.20
   0  -2   6  206.18   14.80
   0  -2  -6  197.58   13.90
   0  -2  -6  209.58   10.40
   0   2  -7  221.28   15.50
   0   2   7  202.68   14.70
   0   2  -7  198.28   11.30
   0   2   7  218.38   16.20
   0   2   7  220.98   10.10
   0   2  -7  196.28   10.80
   0  -2   7  193.38    9.90
   0  -2  -7  208.48   14.90
   0  -2  -7  213.98   16.50
   0  -2   7  244.78   16.50
   0   2  -8   19.70    5.70
   0   2   8   34.50    8.70
   0   2   8   23.50    4.60
   0   2  -8   23.40    6.00
   0   2   8   29.70    9.90
   0   2  -8   14.50    8.10
   0  -2  -8   25.10    8.90
   0  -2   8   15.70    5.00
   0  -2   8   13.40    8.90
   0   2  -9   10.10    5.40
   0   2   9    2.40   10.30
   0   2  -9    3.50    5.90
   0   2   9    6.40    4.00
   0  -2   9    7.50   10.50
   0  -2  -9   12.60    9.00
   0  -2   9    3.50    4.90
   0   2 -10  106.79   10.50
   0   2  10  137.59   16.90
   0   2  10  133.59    7.70
   0   2 -10  111.39    9.20
   0  -2 -10   94.89   13.20
   0  -2  10  130.49   10.30
   0  -2  10  126.79   16.00
   0   2 -11   32.30    6.40
   0   2 -11   18.80    7.30
   0   2  11   47.10   13.10
   0  -2 -11   36.70   11.20
   0  -2  11   32.20   12.90
   0   2 -12    3.40    7.40
   0   2  12   31.30   13.60
   0  -2 -12    5.30   10.20
   0  -2  12   15.60   12.90
   0   2 -13   20.10    8.30
   0   2  13   48.20   15.20
   0  -2 -13   11.00   11.10
   0  -2  13   44.40   15.70
   0   2  14   28.80   15.40
   0   2 -14   18.30    8.60
   0  -2  14   -8.50   13.40
   0  -2 -14    4.30   11.20
   0   3   0   11.30    6.30
   0   3   0    4.70    5.10
   0  -3   0    0.80    4.10
   0  -3   0    1.10    4.90
   0   3   1 1585.24   43.90
   0   3  -1 1583.44   43.30
   0   3   1 1536.65   42.40
   0   3  -1 1582.74   41.20
   0  -3   1 1486.65   40.90
   0  -3  -1 1479.45   42.30
   0  -3   1 1484.05   42.60
   0   3  -2 4352.06  110.59
   0   3  -2 4399.16  107.29
   0   3   2 4158.08  109.29
   0   3   2 4406.06  109.99
   0   3   2 4234.08  110.99
   0  -3   2 4373.16  107.09
   0  -3  -2 4291.07  109.99
   0   3  -3 2107.99   59.29
   0   3   3 2170.28   58.89
   0   3   3 2106.89   59.59
   0   3  -3 2178.38   55.09
   0   3   3 2201.28   57.69
   0  -3   3 2152.78   54.89
   0  -3  -3 2183.38   59.19
   0  -3   3 2185.88   54.89
   0   3   4  252.17   15.50
   0   3  -4  280.27   15.50
   0   3   4  278.17   14.70
   0   3   4  279.37   12.70
   0  -3   4  261.47    9.90
   0  -3  -4  290.97   15.50
   0  -3   4  241.08   14.50
   0  -3   4  253.17    9.50
   0   3   5  294.07   16.10
   0   3   5  330.27   14.10
   0   3  -5  325.67   16.40
   0   3   5  311.97   18.20
   0  -3   5  334.27   17.40
   0  -3  -5  302.17   17.20
   0  -3  -5  315.67   17.40
   0  -3   5  296.87   10.70
   0  -3   5  331.57   11.10
   0   3  -6   40.70    5.00
   0   3  -6   58.69    9.50
   0   3   6   64.79    6.90
   0  -3   6   29.10    8.20
   0  -3  -6   46.80    9.00
   0  -3   6   49.50    4.90
   0  -3  -6   43.20    9.30
   0   3   7    8.50    6.10
   0   3  -7   13.00    8.10
   0   3  -7   26.20    5.00
   0   3   7   16.50    5.20
   0  -3  -7    3.40    8.00
   0  -3   7   17.30    4.20
   0  -3   7    7.50    8.80
   0  -3  -7    4.90    8.90
   0  -3   7   16.90    4.10
   0   3   8   -0.60    4.80
   0   3  -8   -0.10    4.80
   0   3  -8   -4.30    5.70
   0  -3   8    3.30    3.90
   0  -3   8    4.70    9.40
   0  -3  -8   10.30    8.90
   0  -3   8    4.30    4.30
   0   3  -9   30.40    7.50
   0   3   9   20.90   11.60
   0   3  -9   29.10    6.50
   0   3   9   26.20    5.70
   0  -3  -9   27.40   10.50
   0  -3   9   46.60   11.40
   0  -3   9   35.90    5.80
   0  -3   9   38.80    5.50
   0   3 -10  135.79   11.70
   0   3 -10  134.39   10.60
   0   3  10  130.09   16.60
   0   3  10  131.99    9.20
   0  -3  10  109.39   16.00
   0  -3  10  130.39    9.60
   0  -3 -10  153.18   16.80
   0  -3  10  132.19    9.90
   0   3 -11   61.89    8.50
   0   3  11   67.49   14.60
   0   3 -11   73.69    9.00
   0  -3  11   96.09   15.80
   0  -3  11   63.39    7.80
   0  -3 -11   53.29   12.60
   0   3  12   -5.10   12.40
   0   3 -12    2.20    6.60
   0   3 -12   -0.60    6.50
   0  -3 -12    3.40   10.70
   0  -3  12   25.30   13.70
   0   3  13   12.90   14.30
   0   3 -13    3.50    6.80
   0  -3  13   29.30   14.90
   0  -3 -13    3.70   11.50
   0   3  14    6.80   14.20
   0   3 -14   12.50    7.50
   0  -3  14   19.90   15.30
   0  -3 -14   -1.30   11.30
   0   4   0  123.09   11.40
   0   4   0  133.79   10.50
   0  -4   0  134.59   10.90
   0   4   1 2615.74   67.79
   0   4  -1 2533.85   66.29
   0   4  -1 2518.95   68.69
   0   4   1 2492.35   69.09
   0  -4   1 2509.15   68.29
   0  -4  -1 2519.25   67.59
   0  -4   1 2449.35   65.89
   0   4   2  483.25   19.20
   0   4  -2  422.26   16.00
   0   4   2  486.05   19.10
   0   4   2  443.66   20.50
   0   4  -2  427.76   19.50
   0  -4   2  445.06   18.70
   0  -4  -2  428.36   18.90
   0  -4   2  420.16   15.80
   0   4  -3    2.90    6.50
   0   4   3    7.00    7.10
   0   4   3   -1.30    5.80
   0   4  -3    7.30    4.60
   0   4  -3    9.50    4.80
   0   4   3    9.70    7.60
   0  -4   3    4.60    4.30
   0  -4  -3    1.40    6.90
   0  -4   3    3.80    5.90
   0   4   4   91.09    9.60
   0   4  -4   98.79    7.60
   0   4  -4   87.59   10.40
   0   4   4   65.09   10.10
   0   4   4  103.59   11.30
   0  -4  -4  102.29   11.70
   0  -4   4   89.59    7.20
   0   4   5 1125.89   39.20
   0   4   5 1190.58   38.60
   0   4  -5 1177.48   39.00
   0   4   5 1173.58   36.00
   0  -4  -5 1201.88   39.10
   0  -4   5 1145.19   31.70
   0  -4   5 1208.58   31.80
   0   4   6  105.79   11.90
   0   4  -6   82.19   10.40
   0   4   6   98.99   13.30
   0   4   6   80.79    9.00
   0   4  -6   93.99   12.10
   0  -4  -6   98.59   12.40
   0  -4   6   95.09   13.20
   0  -4   6   91.49    6.50
   0  -4  -6  101.89   12.70
   0  -4   6   91.09    6.90
   0   4  -7  367.36   21.80
   0   4   7  344.87   16.60
   0  -4  -7  323.67   19.80
   0  -4   7  374.26   20.70
   0  -4   7  333.47   12.20
   0  -4   7  333.47   11.80
   0   4  -8   76.99   13.30
   0   4   8   58.29    8.30
   0  -4  -8   87.69   13.60
   0  -4   8   69.79    5.60
   0  -4   8   58.59   12.30
   0  -4   8   73.09    5.90
   0   4   9  180.18   12.70
   0   4  -9  163.38   13.70
   0  -4   9  179.68   19.00
   0  -4   9  160.68    8.20
   0  -4  -9  160.28   17.50
   0  -4   9  175.18    8.90
   0   4  10    3.20    5.00
   0   4 -10   -0.10    6.80
   0   4 -10    5.50    4.90
   0   4  10    7.20   12.30
   0  -4  10   -0.40    3.70
   0  -4 -10    6.00   10.40
   0  -4  10    4.80    3.90
   0  -4  10   29.80   12.70
   0   4  11   -6.70   11.70
   0   4 -11    6.80    5.30
   0   4 -11    7.90    7.30
   0  -4 -11    2.00   11.10
   0  -4  11   17.70   12.80
   0   4 -12    4.70    7.30
   0   4 -12    4.90    5.50
   0   4  12   -2.10   12.90
   0  -4 -12    0.90   11.00
   0  -4  12   -1.50   13.20
   0   4  13  102.79   18.40
   0   4 -13  107.29    9.40
   0  -4  13   93.19   18.60
   0  -4 -13  123.19   18.40
   0   5   0   14.40    7.90
   0   5   0    2.30    6.10
   0  -5   0    2.10    6.10
   0  -5   0   -0.60    6.10
   0   5  -1  818.72   30.30
   0   5   1  752.52   30.20
   0   5   1  837.32   28.70
   0   5  -1  834.32   27.40
   0  -5  -1  855.41   30.10
   0  -5   1  836.32   27.40
   0  -5   1  855.41   29.70
   0  -5  -1  838.92   28.80
   0   5  -2  532.75   21.00
   0   5   2  615.14   23.90
   0   5   2  557.54   23.20
   0   5  -2  571.24   24.60
   0   5   2  610.74   25.70
   0  -5  -2  637.84   24.60
   0  -5  -2  572.84   23.70
   0  -5   2  606.84   24.00
   0  -5   2  545.65   20.20
   0   5  -3 3284.87   85.99
   0   5   3 3343.17   89.59
   0   5  -3 3340.77   91.19
   0   5   3 3328.77   91.59
   0   5  -3 3319.57   88.59
   0   5   3 3458.05   90.69
   0  -5   3 3206.08   85.49
   0  -5   3 3350.16   90.59
   0  -5  -3 3374.36   90.59
   0   5   4   96.39   12.60
   0   5   4  130.49   11.70
   0   5   4   97.69   11.60
   0   5  -4  131.59    9.50
   0   5  -4  105.69   11.50
   0  -5  -4  100.19   12.40
   0  -5   4  122.79    8.80
   0  -5   4   96.59    7.60
   0   5   5  158.48   15.90
   0   5  -5  148.59    9.90
   0   5  -5  154.28   15.00
   0   5   5  147.89   14.00
   0   5   5  158.68   13.10
   0  -5   5  167.48    9.20
   0  -5   5  153.98    9.20
   0  -5  -5  144.09   14.10
   0   5   6    4.20   10.00
   0   5  -6    1.40    8.80
   0   5   6   10.80    7.40
   0  -5  -6    9.00    8.80
   0  -5   6   17.70    4.40
   0  -5   6   13.20    4.40
   0   5  -7   11.80    9.80
   0   5   7   -9.70   10.70
   0   5   7    3.10    7.20
   0  -5  -7    0.70    9.90
   0  -5   7    0.90    3.50
   0  -5   7   -1.50    3.70
   0   5   8   69.89   10.10
   0   5  -8   82.79   14.50
   0  -5   8   72.09    5.30
   0  -5   8   68.49    5.60
   0  -5  -8   88.19   15.10
   0   5   9   18.00    7.40
   0   5  -9   25.90   12.30
   0  -5  -9    1.00   11.20
   0  -5   9   26.30   12.10
   0   5 -10    9.20   10.60
   0   5 -10   -3.00    7.80
   0  -5 -10   -6.70   10.00
   0  -5  10   -3.40   12.00
   0   5  11   69.09   17.00
   0   5 -11   69.89   11.20
   0   5 -11   47.30   14.50
   0  -5 -11   57.89   15.00
   0  -5  11   63.79   15.70
   0   5  12   17.50   14.50
   0   5 -12    2.20   12.70
   0  -5 -12   10.60   12.20
   0  -5  12    6.30   13.40
   0   5 -13   17.90   14.80
   0   5  13   11.10   14.40
   0  -5  13    6.30   14.10
   0  -5 -13   -1.80   12.20
   0   6   0  443.96   23.80
   0   6   0  459.95   20.50
   0  -6   0  428.76   20.00
   0  -6   0  446.76   22.30
   0   6   1  170.08   14.20
   0   6  -1  142.49   12.30
   0   6   1  128.59   14.80
   0   6  -1  148.59   14.90
   0  -6  -1  137.09   13.10
   0  -6   1  144.99   12.00
   0  -6  -1  131.89   12.50
   0  -6   1  132.49   13.30
   0   6  -2   25.10    7.60
   0   6   2   26.90    8.50
   0   6  -2   49.99   11.00
   0   6   2   30.90    9.70
   0   6   2   16.10   10.40
   0  -6  -2   15.20    7.50
   0  -6  -2   21.30    8.30
   0  -6   2   30.70    7.50
   0  -6   2   25.20    8.50
   0   6   3   -4.00    9.90
   0   6  -3    2.00    7.10
   0   6  -3    5.50    6.10
   0   6   3   10.30    8.30
   0   6  -3    6.00    8.40
   0   6   3   -9.70    7.10
   0  -6   3   12.10    6.10
   0  -6  -3   13.10    8.10
   0  -6   3   12.40    7.50
   0  -6  -3   -1.80    7.80
   0   6   4   78.29   11.90
   0   6  -4   48.70   11.10
   0   6  -4   44.80    7.60
   0   6   4   59.29   13.10
   0   6   4   64.09   10.70
   0  -6   4   54.59    7.40
   0  -6   4   58.79    7.30
   0  -6  -4   44.30   11.10
   0   6   5  129.59   16.50
   0   6   5  129.19   16.80
   0   6  -5  117.49    9.60
   0   6   5  137.49   13.60
   0   6  -5  130.99   15.60
   0  -6   5  141.79    9.70
   0  -6  -5  138.89   16.10
   0  -6   5  119.59    9.70
   0   6  -6  207.68   19.10
   0   6  -6  206.08   11.90
   0   6   6  193.98   15.90
   0   6   6  154.68   17.80
   0  -6   6  192.08   10.60
   0  -6   6  209.98   10.70
   0  -6  -6  207.18   19.50
   0   6  -7    4.40   10.80
   0   6   7    7.20   12.60
   0   6   7   18.80    9.20
   0  -6   7   14.40    4.30
   0  -6   7    7.30    4.30
   0  -6  -7    3.00    9.90
   0   6   8   66.59   15.50
   0   6  -8  111.99   16.60
   0   6   8   79.59   11.80
   0  -6  -8   92.29   15.80
   0   6  -9   95.09   16.20
   0   6   9   80.09   11.30
   0  -6  -9   65.99   15.80
   0   6 -10   32.80   14.30
   0  -6 -10   15.40   12.70
   0   6 -11   21.90    9.60
   0   6 -11   16.80   13.60
   0  -6 -11   22.00   14.50
   0   6  12   13.10   15.90
   0   6 -12   11.60   14.60
   0  -6 -12   15.90   14.20
   0   7   0   25.00   12.10
   0   7   0   -3.50    7.90
   0  -7   0    7.30    7.80
   0   7   1   41.20   10.20
   0   7  -1   49.10    9.90
   0   7  -1   29.90   11.70
   0   7   1   77.99   14.90
   0  -7   1   30.20    8.80
   0  -7  -1   44.70   11.00
   0   7   2  246.98   21.20
   0   7  -2  263.47   21.60
   0   7  -2  238.38   16.60
   0   7   2  244.98   18.50
   0  -7   2  234.38   15.80
   0  -7  -2  245.18   19.20
   0   7   3  154.18   18.10
   0   7  -3  160.68   17.10
   0   7   3  163.38   16.50
   0   7  -3  173.68   14.00
   0  -7   3  152.68   12.50
   0  -7  -3  151.08   16.50
   0   7  -4   66.19    9.30
   0   7  -4   62.79   13.30
   0   7   4   57.09   12.60
   0   7   4   62.99   15.40
   0  -7   4   53.99    8.50
   0  -7  -4   34.50   11.80
   0   7   5    1.10   13.10
   0   7  -5   -1.80    6.10
   0   7  -5   -4.30   10.90
   0  -7   5   -3.20    5.30
   0  -7  -5    2.70   10.90
   0  -7   5    6.00    6.00
   0   7  -6   10.10   11.90
   0   7   6    3.90   12.80
   0   7  -6    2.20    6.20
   0  -7   6    4.60    5.10
   0  -7   6   10.30    5.50
   0  -7  -6    6.10   12.10
   0   7   7   10.30   13.00
   0   7  -7  -17.40   10.40
   0  -7   7   -7.10    4.30
   0  -7  -7    4.70   11.80
   0  -7   7    2.90    4.50
   0   7   8   25.10   14.50
   0   7  -8   19.00   12.40
   0  -7  -8   -5.10   11.10
   0   7  -9    9.20   12.90
   0  -7  -9    0.80   12.30
   0   7 -10   31.30   15.20
   0  -7 -10   10.50   14.00
   0   7 -11   -6.80   13.30
   0  -7 -11    2.60   14.00
   0   8   0  223.88   21.20
   0   8   0  181.08   17.00
   0  -8   0  157.88   15.60
   0   8   1   19.00   13.60
   0   8   1   25.80   10.40
   0   8  -1   -7.30    8.70
   0   8  -1   12.40   12.60
   0  -8  -1    2.30    9.50
   0  -8   1    0.40    8.10
   0   8  -2  136.79   14.30
   0   8   2  140.59   19.30
   0   8  -2  112.09   17.20
   0   8   2  136.39   16.30
   0  -8   2  145.39   14.00
   0  -8  -2  136.89   16.30
   0   8  -3   19.00   13.10
   0   8   3   36.70   14.90
   0   8   3    5.70   10.70
   0   8  -3   29.90    9.00
   0  -8   3   26.70    8.60
   0  -8  -3   13.10   10.60
   0   8  -4    4.20   12.10
   0   8   4   -2.00   13.00
   0   8  -4    3.10    7.70
   0  -8   4    4.20    6.90
   0  -8  -4   -0.80   10.80
   0   8   5   -9.40   13.10
   0   8  -5   12.30   12.60
   0   8  -5    4.40    7.00
   0  -8  -5    2.50   11.00
   0  -8   5    4.50    6.20
   0   8  -6   68.99   14.90
   0   8   6   59.99   16.10
   0  -8  -6   35.60   13.20
   0   8  -7   13.20   13.60
   0   8   7   -7.80   13.70
   0  -8  -7    9.30   12.90
   0   8   8   20.50   15.90
   0   8  -8   25.10   13.80
   0  -8  -8   -4.10   11.80
   0   8   9    6.00   14.80
   0   8  -9   21.30   14.20
   0  -8  -9    7.10   13.70
   0   8 -10   -3.70   14.60
   0  -8 -10   30.50   15.80
   0   9   0    3.50   13.80
   0   9   0    7.10    9.60
   0  -9   0   -4.90    9.20
   0   9   1   -7.40    9.80
   0   9  -1   11.50    9.80
   0   9  -1    1.60   13.60
   0   9   1   28.20   15.10
   0  -9   1  -12.40    8.10
   0  -9  -1    9.80   10.40
   0   9  -2  117.89   18.50
   0   9   2  127.79   20.10
   0   9  -2  112.69   14.60
   0  -9  -2  139.69   17.50
   0  -9   2  113.89   14.10
   0   9   3  -10.60   13.60
   0   9  -3    2.40   13.20
   0  -9   3   -6.50    7.60
   0  -9  -3   13.90   11.50
   0   9  -4   24.10   13.90
   0   9   4   38.50   16.20
   0  -9  -4   31.30   13.10
   0   9   5   35.00   16.40
   0   9  -5   15.50   14.20
   0  -9  -5   25.40   13.80
   0   9   6   10.00   15.80
   0   9  -6  -24.20   12.40
   0  -9  -6   -1.10   12.80
   0   9  -7   -9.70   12.30
   0   9   7    8.00   15.50
   0  -9  -7   -5.80   13.00
   0   9   8   25.80   16.50
   0   9  -8    0.00   13.80
   0  -9  -8   11.20   14.70
   0   9  -9   -5.70   14.70
   0   9   9   -0.10   16.30
   0  -9  -9   16.40   15.00
   0  10   0   35.20   17.00
   0 -10   0   32.40   12.30
   0  10  -1   72.09   18.20
   0  10   1   50.09   17.50
   0 -10  -1   51.29   13.70
   0 -10   1   63.89   12.80
   0  10   2   -2.00   16.00
   0  10  -2   12.30   16.20
   0 -10  -2   17.80   12.20
   0  10   3    9.30   17.30
   0  10  -3   -7.50   13.80
   0 -10  -3   -0.70   11.60
   0  10  -4  -18.20   13.80
   0  10   4    3.00   16.30
   0 -10  -4   -4.20   12.10
   0  10   5   -5.00   16.10
   0  10  -5   27.30   15.90
   0 -10  -5   -8.30   13.00
   0  10  -6   10.60   14.70
   0  10   6    5.00   15.40
   0 -10  -6  -20.20   11.70
   0  10   7    0.50   16.50
   0  10  -7  -35.70   13.80
   0 -10  -7   18.90   14.90
   0  11   0    3.00   16.90
   0  11  -1   11.10   17.80
   0  11   1  -52.59   14.30
   0  11  -2  -25.50   16.50
   0  11   2   -0.70   17.20
   0 -11  -2   -3.10   12.20
   0  11  -3   29.30   18.50
   0  11   3   13.10   18.50
   0 -11  -3   19.80   13.20
   0  11  -4  -18.50   16.20
   0  11   4    3.50   17.80
   0 -11  -4   -4.30   12.90
  -1   0  14   42.20   15.40
   1   0 -14   31.90   10.60
  -1   0  13    9.00   12.90
   1   0 -13   -1.70    8.30
  -1   0  12   92.49   16.10
   1   0 -12   65.19    7.10
   1   0 -12   87.49   12.00
   1   0 -11    2.40    5.20
  -1   0  11   -5.50   10.70
   1   0 -11    5.80    7.90
   1   0 -10  197.68   15.30
   1   0 -10  222.48   12.10
  -1   0  10  225.08   19.00
   1   0  -9    0.40    4.80
  -1   0   9   -0.40    9.40
   1   0  -9    1.40    6.30
  -1   0   9   10.50    5.90
   1   0  -8  754.52   25.30
  -1   0   8  752.52   24.70
   1   0  -8  717.53   22.80
  -1   0   8  704.23   28.50
   1   0  -7    0.40    5.30
  -1   0   7   -6.90    6.50
  -1   0   7    0.40    4.60
   1   0  -7   -2.50    4.20
  -1   0   6    5.30    3.80
   1   0  -6    1.50    4.00
   1   0  -6    8.10    5.00
   1   0  -6    5.30    5.90
  -1   0   6    7.30    4.40
  -1   0   6    2.70    6.40
  -1   0   5    0.30    3.40
  -1   0   5    3.70    3.80
   1   0  -5   -2.20    5.10
  -1   0   5   -1.40    5.50
   1   0  -5    3.80    3.70
   1   0  -5    0.10    4.10
  -1   0   4 3866.71   95.59
   1   0  -4 3976.50   95.79
   1   0  -4 3836.72   95.59
  -1   0   4 3736.03   95.29
   1   0  -4 3756.12   95.39
  -1   0   4 3849.01   95.59
   1   0  -3    1.40    3.50
  -1   0   3    0.90    3.30
   1   0  -3   -0.80    3.30
  -1   0   3   -6.70    4.40
  -1   0   3   -1.40    3.40
   1   0  -3    7.20    4.40
   1   0  -2 1762.32   44.20
  -1   0   2 1741.73   44.80
  -1   0   2 1756.12   43.90
   1   0  -2 1760.92   44.80
  -1   0   2 1795.52   44.20
   1   0  -2 1746.23   43.90
  -1   0   1    0.60    1.30
   1   0  -1   -1.10    0.90
   1   0  -1   -0.60    1.40
  -1   0   1   -0.80    0.90
  -1   0   1   -2.50    1.70
   1   0  -1   -0.60    1.10
   1   0   0 1753.72   43.40
  -1   0   0 1743.73   43.40
   1   0   1   -4.80    2.20
  -1   0  -1   -5.50    1.10
   1   0   1   -5.10    1.70
  -1   0  -1   -2.80    2.30
  -1   0  -1   -3.90    2.50
   1   0   1   -3.90    1.20
  -1   0  -2  194.28    9.40
   1   0   2  212.38   10.10
   1   0   2  192.98    8.90
  -1   0  -2  220.18   10.10
  -1   0  -3    0.40    4.50
  -1   0  -3   -2.40    3.10
   1   0   3   -4.40    4.10
   1   0   3    2.20    5.50
   1   0   4 1712.53   49.50
   1   0   4 1985.30   51.29
  -1   0  -4 1936.61   50.29
  -1   0  -5   -3.90    4.80
   1   0   5    5.20    6.60
   1   0   5    1.70    4.80
   1   0   6  165.98   13.30
   1   0   6  130.09   10.20
  -1   0  -6  132.09   10.50
   1   0   7   -1.40    5.10
  -1   0  -7    9.10    6.50
   1   0   7    2.80    7.50
  -1   0  -8   93.79   10.70
   1   0   8   64.49   11.50
   1   0   8   98.29   10.40
  -1   0  -9    2.30    7.50
   1   0   9   -5.50   10.20
  -1   0 -10  389.76   20.80
   1   0  10  357.36   25.00
  -1   0 -11   17.20    8.80
   1   0  11   10.50   11.80
  -1   0 -12   98.89   13.30
   1   0  12   94.89   17.20
   1   0  13    8.50   13.90
  -1   0 -13   -5.80    9.10
  -1   0 -14    2.70    9.60
   1   0  14   11.50   14.70
   1   1 -14   33.30    9.30
  -1   1  14   11.80   14.00
   1  -1 -14    4.60   10.30
  -1  -1  14   23.00   14.80
  -1   1  13   13.90   12.80
   1   1 -13    6.70    7.90
  -1  -1  13   -3.50   12.10
   1  -1 -13    9.80    9.40
  -1   1  12   99.89   16.80
   1   1 -12  114.09    9.20
   1   1 -12   99.29   11.20
  -1  -1  12  128.99   17.80
   1  -1 -12  105.19   13.80
   1  -1 -12   99.09    8.00
   1   1 -11   34.30    8.20
  -1   1  11   50.09   13.20
   1   1 -11   31.90    6.80
   1  -1 -11   46.90   10.40
  -1  -1  11   17.50   11.50
   1  -1 -11   42.10    6.50
   1   1 -10  407.96   18.40
   1   1 -10  380.66   16.50
  -1   1  10  401.56   24.80
   1  -1 -10  411.96   21.00
  -1  -1  10  345.37   24.40
   1  -1 -10  391.86   16.00
  -1  -1  10  408.46   17.30
   1   1  -9    5.70    5.30
   1   1  -9   -4.40    5.60
  -1   1   9   -1.70    6.30
  -1   1   9  -10.40    8.40
  -1   1   9    2.40    4.00
   1  -1  -9   13.00    7.80
  -1  -1   9   -1.70    4.80
   1  -1  -9   -0.70    4.90
  -1  -1   9   -1.80    9.20
   1   1  -8   69.69    7.60
  -1   1   8   74.39    9.20
   1   1  -8  106.89   12.10
   1   1  -8   80.99    7.80
  -1   1   8   94.29    7.30
  -1   1   8   98.59   12.60
  -1  -1   8   79.09    7.40
  -1  -1   8  102.29   12.80
   1  -1  -8   83.89   10.00
   1  -1  -8   91.79    7.90
   1  -1  -8   73.79   10.90
  -1   1   7  231.98   15.80
   1   1  -7  259.67   15.60
   1   1  -7  238.38   11.80
   1   1  -7  226.58   11.30
  -1   1   7  265.97   13.80
  -1   1   7  247.98   11.00
  -1  -1   7  226.18   10.90
  -1  -1   7  221.58   15.60
   1  -1  -7  273.07   16.60
   1  -1  -7  264.27   11.70
   1  -1  -7  239.98   13.60
   1   1  -6 1947.11   51.19
  -1   1   6 1954.30   53.79
  -1   1   6 1931.71   52.69
   1   1  -6 1838.42   49.90
   1   1  -6 1949.41   53.59
  -1   1   6 1897.71   50.49
  -1  -1   6 1948.61   53.69
   1  -1  -6 1869.41   52.69
   1  -1  -6 1998.00   55.39
   1  -1  -6 1915.51   50.69
   1   1  -5  923.31   29.00
   1   1  -5  932.91   27.30
   1   1  -5  910.01   25.60
  -1   1   5  949.80   29.10
  -1   1   5  967.80   26.80
   1  -1  -5  959.10   28.50
  -1  -1   5  955.50   25.40
   1  -1  -5  961.30   30.10
  -1  -1   5  881.71   28.80
   1  -1  -5  958.70   26.90
  -1   1   4 3928.91   95.89
   1   1  -4 3777.62   96.09
   1   1  -4 3782.42   93.89
   1   1  -4 3886.41   95.79
  -1   1   4 3841.12   96.79
  -1  -1   4 3717.63   95.69
  -1  -1   4 3834.42   93.69
   1  -1  -4 3807.12   95.79
   1  -1  -4 3870.51   98.29
   1  -1  -4 3847.82   96.89
   1   1  -3  227.98    7.10
  -1   1   3  247.98   10.60
  -1   1   3  238.18   10.90
   1   1  -3  234.68   11.10
   1   1  -3  229.18   10.50
   1  -1  -3  238.58   11.80
   1  -1  -3  240.48   11.10
   1  -1  -3  246.68   10.40
  -1  -1   3  236.58    6.90
  -1  -1   3  231.48   11.10
  -1   1   2 3196.78   81.79
  -1   1   2 3319.37   81.39
   1   1  -2 3260.77   79.89
   1  -1  -2 3316.07   81.39
  -1  -1   2 3280.27   79.99
   1  -1  -2 3183.28   81.39
   1  -1  -2 3250.97   81.79
   1   1  -1  188.08    6.10
   1   1  -1  200.58    7.10
  -1   1   1  203.58    8.00
  -1   1   1  205.08    7.70
  -1   1   1  199.18    7.60
  -1  -1   1  192.88    6.10
   1  -1  -1  187.98    7.40
  -1  -1   1  205.98    7.20
   1  -1  -1  206.98    7.90
   1  -1  -1  198.28    7.70
  -1   1   0 2467.65   60.09
   1   1   0 2446.56   60.09
   1   1   0 2491.65   59.89
  -1   1   0 2134.59   59.99
  -1   1   0 2382.26   60.19
   1  -1   0 2467.45   60.19
   1  -1   0 2411.16   59.99
  -1  -1   0 2483.05   60.19
  -1  -1   0 2410.66   59.79
   1  -1   0 2364.26   60.19
   1   1   1   83.99    6.40
  -1   1  -1   91.79    5.70
   1   1   1   86.99    6.30
  -1   1  -1   92.99    5.70
  -1   1  -1   85.49    5.50
  -1   1  -1  101.59    6.30
   1  -1   1   92.49    5.30
  -1  -1  -1  101.39    6.50
   1  -1   1   93.69    5.70
  -1  -1  -1   95.49    6.70
   1  -1   1   96.79    6.00
  -1   1  -2   58.79    5.20
  -1   1  -2   57.89    6.40
  -1  -1  -2   51.19    6.10
   1  -1   2   52.69    6.30
  -1  -1  -2   40.70    5.90
   1  -1   2   57.49    4.90
  -1   1  -3   41.90    5.20
   1   1   3   41.20    3.40
  -1   1  -3   26.40    5.00
  -1  -1  -3   36.90    6.30
   1  -1   3   37.60    5.10
  -1  -1  -3   34.10    5.90
   1  -1   3   38.80    6.90
   1   1   4   12.50    2.30
   1   1   4    0.10    3.10
  -1   1  -4    1.00    2.40
  -1   1  -4    4.60    4.40
   1  -1   4    9.10    3.80
  -1  -1  -4    7.50    5.30
   1  -1   4    9.90    6.20
  -1   1  -5  377.36   15.00
   1   1   5  408.76   16.20
   1   1   5  402.76   18.00
   1   1   5  372.26   10.70
   1  -1   5  365.36   17.60
  -1  -1  -5  362.16   16.50
   1  -1   5  392.46   14.50
  -1   1  -6  967.90   26.90
   1   1   6 1021.40   31.60
  -1   1  -6  995.50   30.20
   1   1   6  952.10   33.10
   1  -1   6  995.60   29.70
   1  -1   6  957.40   33.10
  -1  -1  -6 1032.80   32.30
  -1   1  -7    9.00    3.40
   1   1   7    7.60    6.20
   1   1   7    5.40    8.70
  -1   1  -7    7.20    5.90
  -1   1  -7    9.30    5.80
   1  -1   7    8.80    8.80
   1  -1   7    3.40    4.90
  -1  -1  -7    8.40    6.50
   1   1   8  996.20   34.00
  -1   1  -8 1001.60   27.20
   1   1   8 1030.30   36.90
  -1   1  -8  990.90   32.50
   1  -1   8 1023.20   31.60
   1  -1   8  973.00   36.30
  -1  -1  -8  995.00   34.50
  -1   1  -9  117.39   11.60
  -1   1  -9  131.29    7.00
   1   1   9  133.19   15.90
   1  -1   9  106.19   10.30
   1  -1   9  118.99   14.90
  -1  -1  -9   99.69   12.60
   1   1  10   40.10   12.60
  -1   1 -10   38.10    9.00
  -1  -1 -10   40.30   10.30
   1  -1  10   70.39   14.00
   1   1  11   12.70   11.80
  -1   1 -11   34.20    9.30
   1  -1  11    6.50   11.60
  -1  -1 -11   13.90    9.50
  -1   1 -12   45.30   10.70
   1   1  12   35.50   14.50
   1  -1  12   34.00   14.40
  -1  -1 -12   40.40   11.70
   1   1  13    9.70   13.50
  -1   1 -13   -4.70    8.60
  -1  -1 -13  -10.60    9.30
   1  -1  13   -9.30   12.90
   1   1  14   33.70   15.50
  -1   1 -14   47.30   11.50
  -1  -1 -14   57.29   14.10
   1  -1  14   58.79   17.70
   1   2 -14    9.10    7.30
  -1   2  14   18.50   14.30
   1  -2 -14    1.70   10.30
  -1  -2  14   -4.80   13.20
  -1   2  13   14.60   13.10
   1   2 -13    5.90    7.30
  -1  -2  13    6.90   13.10
   1  -2 -13    3.60    9.60
   1   2 -12    0.20    5.70
   1   2 -12   -6.30    6.10
  -1   2  12   13.50   11.50
   1  -2 -12   -3.00    8.40
  -1  -2  12    1.10   11.50
   1   2 -11   55.69    8.20
   1   2 -11   53.49    8.20
  -1   2  11   62.89   13.80
  -1   2  11   65.99    6.80
   1  -2 -11   44.80   11.30
  -1  -2  11   71.39   14.70
   1  -2 -11   78.29    8.00
  -1  -2  11   57.39    7.20
   1   2 -10  355.56   17.00
  -1   2  10  375.66   24.80
   1   2 -10  359.46   16.00
  -1   2  10  349.67   14.90
   1  -2 -10  352.86   16.10
   1  -2 -10  379.86   22.00
  -1  -2  10  349.67   14.60
  -1  -2  10  364.36   24.40
   1   2  -9  288.47   13.70
  -1   2   9  314.17   13.50
  -1   2   9  261.17   20.20
   1   2  -9  299.87   15.30
  -1  -2   9  325.37   20.90
   1  -2  -9  318.67   19.10
  -1  -2   9  298.87   12.50
   1  -2  -9  320.57   14.70
   1   2  -8  538.15   23.70
   1   2  -8  542.15   20.20
  -1   2   8  512.45   24.60
  -1   2   8  492.85   18.00
   1   2  -8  513.45   17.60
  -1   2   8  526.65   22.20
   1  -2  -8  528.75   25.10
   1  -2  -8  519.25   22.70
  -1  -2   8  503.15   23.80
   1  -2  -8  485.85   18.80
  -1  -2   8  527.55   16.60
   1   2  -7  315.97   14.80
  -1   2   7  336.27   13.70
  -1   2   7  373.96   17.20
  -1   2   7  337.17   18.40
   1   2  -7  328.87   12.40
   1   2  -7  296.57   17.30
  -1  -2   7  319.07   17.90
   1  -2  -7  340.97   17.80
   1  -2  -7  349.47   19.30
   1  -2  -7  348.07   14.80
   1   2  -6   73.09    5.70
  -1   2   6   50.99    6.30
  -1   2   6   62.19    8.30
   1   2  -6   74.59    9.70
   1   2  -6   56.49    7.10
   1  -2  -6   66.49    7.20
  -1  -2   6   44.20    8.00
   1  -2  -6   57.79    8.50
   1  -2  -6   77.89   10.90
  -1  -2   6   63.59    4.70
  -1   2   5  432.76   17.50
   1   2  -5  408.56   12.50
   1   2  -5  459.85   18.30
  -1   2   5  481.25   16.10
  -1  -2   5  416.56   11.80
  -1  -2   5  445.16   18.20
   1  -2  -5  447.66   19.10
   1  -2  -5  431.26   16.40
   1  -2  -5  398.46   17.70
  -1   2   4  191.98   10.60
   1   2  -4  182.78   11.20
  -1   2   4  213.68   13.20
  -1  -2   4  191.78   12.00
   1  -2  -4  183.88   12.60
   1  -2  -4  191.38   12.00
   1  -2  -4  193.88   11.00
  -1   2   3 4304.57  111.69
   1   2  -3 4274.47  111.19
  -1   2   3 4427.46  111.19
   1   2  -3 4528.75  109.29
   1   2  -3 4333.37  106.69
  -1   2   3 4538.85  110.59
   1  -2  -3 4387.66  110.49
   1  -2  -3 4438.06  111.99
   1  -2  -3 4419.26  111.39
  -1  -2   3 4355.06  109.09
  -1   2   2 6778.32  169.58
   1   2  -2 6843.22  168.88
   1   2  -2 6746.33  165.48
  -1   2   2 6828.72  168.58
   1   2  -2 6866.01  165.48
  -1   2   2 6810.02  168.58
  -1  -2   2 6718.33  166.08
   1  -2  -2 6791.42  168.58
   1  -2  -2 6800.12  169.58
  -1  -2   2 6920.41  168.88
   1  -2  -2 6912.21  168.68
  -1   2   1 2424.06   63.49
   1   2  -1 2495.95   61.39
   1   2  -1 2437.16   62.99
  -1   2   1 2416.96   63.19
  -1   2   1 2525.35   63.19
  -1  -2   1 2423.56   62.89
  -1  -2   1 2379.76   61.19
   1  -2  -1 2534.45   63.49
   1  -2  -1 2485.25   63.39
   1  -2  -1 2381.76   62.79
  -1   2   0   12.50    5.20
   1   2   0    9.20    4.30
   1   2   0   10.60    5.20
  -1   2   0   -3.60    2.80
  -1   2   0    5.00    4.20
   1  -2   0    6.10    3.80
  -1  -2   0   11.10    4.30
  -1  -2   0    2.50    4.60
   1  -2   0   18.10    4.80
   1   2   1  171.18   10.00
  -1   2  -1  173.58    8.90
  -1   2  -1  164.68    9.80
  -1   2  -1  162.38   10.20
   1   2   1  163.28   11.10
  -1  -2  -1  154.48    9.90
   1  -2   1  149.09    8.70
  -1  -2  -1  175.28   11.00
  -1   2  -2  255.67   12.80
   1   2   2  219.38   13.00
   1   2   2  245.68   12.30
  -1   2  -2  237.08   11.90
  -1   2  -2  234.88   10.00
   1  -2   2  243.88    9.70
   1  -2   2  235.48   12.00
  -1  -2  -2  213.78   12.50
   1  -2   2  245.68    9.90
  -1  -2  -2  196.48   11.20
   1   2   3 2186.98   59.49
   1   2   3 2243.18   60.39
   1   2   3 2262.67   57.19
  -1   2  -3 2214.18   57.19
  -1  -2  -3 2177.18   59.69
   1  -2   3 2254.17   57.09
   1  -2   3 2242.08   58.89
   1  -2   3 2268.07   57.09
   1   2   4 1135.79   31.10
  -1   2  -4 1197.08   31.90
   1  -2   4 1149.89   31.70
   1  -2   4 1109.29   34.20
   1  -2   4 1151.28   31.50
  -1  -2  -4 1123.29   34.60
  -1   2  -5  677.33   21.70
   1   2   5  708.23   20.20
   1  -2   5  712.43   25.40
  -1  -2  -5  621.94   24.10
   1  -2   5  677.13   21.10
  -1  -2  -5  735.83   26.00
   1  -2   5  696.93   21.60
  -1   2  -6  129.99    9.70
   1   2   6  170.28   12.20
   1   2   6  143.99    7.40
  -1  -2  -6  120.79   11.70
   1  -2   6  130.49    9.00
   1  -2   6  117.99   11.70
   1   2   7 1005.40   35.40
  -1   2  -7  983.70   30.60
   1   2   7 1011.20   27.10
  -1   2  -7  982.20   29.20
   1   2   7 1079.19   34.60
   1  -2   7  960.40   35.20
   1  -2   7  998.20   30.10
  -1  -2  -7  987.00   34.30
   1   2   8  110.69   14.00
  -1   2  -8  131.09    9.40
  -1   2  -8  142.79   11.70
   1   2   8  136.39    6.50
  -1  -2  -8  136.49   13.60
   1  -2   8  142.79   10.40
   1  -2   8   93.79   13.40
  -1   2  -9   66.59    6.90
  -1   2  -9   75.99    9.80
   1   2   9   65.99   13.40
   1  -2   9   70.19   13.60
   1  -2   9   78.79    8.80
  -1  -2  -9   84.89   12.60
   1   2  10  252.87   22.40
  -1   2 -10  320.17   17.40
  -1   2 -10  295.07   12.80
   1  -2  10  303.77   23.60
  -1  -2 -10  305.87   20.60
  -1   2 -11   36.90    5.40
  -1   2 -11   51.59    9.80
   1   2  11   63.19   14.70
   1  -2  11   34.20   13.60
  -1  -2 -11   60.99   12.70
   1   2  12   10.50   12.60
  -1   2 -12   27.50    8.80
  -1  -2 -12   30.90   11.70
   1  -2  12   37.60   14.50
  -1   2 -13   -9.50    7.60
   1   2  13  -16.70   12.30
  -1  -2 -13   -1.60   11.30
   1  -2  13   -0.80   13.20
   1   3 -14    0.00    5.80
  -1   3  14  -14.10   13.00
  -1  -3  14  -15.60   12.90
   1  -3 -14   13.00   11.90
   1   3 -13   66.09    8.50
  -1   3  13   73.69   16.20
   1  -3 -13   72.89   14.30
  -1  -3  13   76.09   16.30
   1   3 -12   25.00    6.40
  -1   3  12   35.30   13.50
   1   3 -12   29.30    8.10
   1  -3 -12   31.20   12.20
  -1  -3  12   11.20   12.90
  -1   3  11  105.39   16.80
   1   3 -11  118.49   11.80
   1   3 -11  121.79    9.30
   1  -3 -11  143.79   16.50
  -1  -3  11  100.09   16.00
  -1  -3  11  133.89    7.70
   1   3 -10  254.07   16.50
  -1   3  10  273.17   22.10
   1   3 -10  267.57   12.50
  -1  -3  10  290.97   23.00
   1  -3 -10  259.37   21.00
  -1  -3  10  290.37   10.70
  -1  -3  10  283.27   10.40
   1   3  -9   85.19    9.80
   1   3  -9   74.49    6.60
  -1   3   9   92.59   14.20
  -1  -3   9   78.79    5.60
  -1  -3   9   75.39   13.20
   1  -3  -9   66.99   12.10
  -1  -3   9   76.89    5.80
  -1   3   8    4.50    3.70
   1   3  -8   18.60    7.20
   1   3  -8   25.20    4.30
   1  -3  -8   22.10    9.40
   1  -3  -8    8.70    6.60
  -1  -3   8   22.20    9.90
   1   3  -7  898.31   25.00
  -1   3   7  951.60   32.50
   1   3  -7  969.70   33.20
   1  -3  -7  937.41   33.20
  -1  -3   7  914.31   32.90
   1  -3  -7  925.51   34.60
   1  -3  -7  941.71   29.90
   1   3  -6   73.39   10.60
   1  -3  -6   80.59   11.50
  -1  -3   6   72.39   10.30
   1  -3  -6   54.89    7.80
   1  -3  -6   74.39   10.30
   1   3  -5 2561.94   67.69
   1   3  -5 2465.25   68.79
  -1   3   5 2491.85   66.39
  -1   3   5 2511.95   69.49
  -1   3   5 2513.75   68.39
   1  -3  -5 2437.66   66.59
  -1  -3   5 2483.25   67.39
   1  -3  -5 2475.65   68.69
   1  -3  -5 2493.75   69.49
   1   3  -4   92.69    9.30
   1   3  -4   80.89    8.50
  -1   3   4  105.39   10.30
   1   3  -4  109.59    5.40
  -1   3   4   64.89    9.10
  -1   3   4  105.39    9.00
  -1  -3   4  112.29    4.60
   1  -3  -4  101.99   10.60
   1  -3  -4   87.39    8.90
  -1  -3   4  101.19    4.60
   1  -3  -4   88.39    9.20
   1   3  -3  164.28   12.10
  -1   3   3  150.58   10.70
   1   3  -3  170.48   11.40
   1   3  -3  177.68    7.60
  -1   3   3  165.48   13.10
  -1   3   3  161.88   11.20
   1  -3  -3  168.28   12.50
   1  -3  -3  187.38   13.50
  -1  -3   3  164.28    7.00
   1   3  -2   28.50    6.50
   1   3  -2   28.50    4.50
  -1   3   2   44.50    6.40
  -1   3   2   38.60    7.40
  -1   3   2   22.60    6.70
  -1  -3   2   39.60    6.40
   1  -3  -2   28.30    6.70
  -1  -3   2   24.80    4.20
   1  -3  -2   36.40    7.40
   1   3  -1 2079.49   54.09
  -1   3   1 2121.39   55.89
  -1   3   1 2075.09   56.09
  -1   3   1 2010.40   56.69
   1   3  -1 2129.29   56.29
   1  -3  -1 2047.90   55.69
  -1  -3   1 2048.40   53.89
  -1  -3   1 2141.79   55.99
   1  -3  -1 2098.79   56.39
   1   3   0    8.40    6.50
  -1   3   0   24.10    6.50
   1   3   0   21.70    5.60
  -1   3   0   17.20    5.80
   1  -3   0   15.00    4.60
  -1  -3   0   25.70    6.00
   1  -3   0   21.40    5.70
  -1  -3   0   34.60    6.00
  -1   3  -1 4531.35  112.49
  -1   3  -1 4303.97  114.29
   1   3   1 4580.74  113.59
   1   3   1 4484.95  114.69
   1  -3   1 4462.25  112.29
  -1  -3  -1 4363.06  113.19
  -1  -3  -1 4671.63  114.99
   1   3   2  658.83   22.20
   1   3   2  598.64   22.60
  -1   3  -2  610.84   22.20
  -1   3  -2  605.24   19.70
   1  -3   2  617.74   19.50
   1  -3   2  623.54   19.10
  -1  -3  -2  613.94   22.10
  -1   3  -3  323.67   14.70
   1   3   3  286.47   14.80
  -1   3  -3  269.77   11.60
  -1   3  -3  269.47   14.70
   1  -3   3  256.77   14.50
   1  -3   3  275.97   11.50
  -1  -3  -3  278.17   15.10
  -1  -3  -3  294.57   15.50
   1   3   4   71.09   10.10
  -1   3  -4   58.69    8.00
  -1   3  -4   40.70    8.10
   1   3   4   85.89   10.00
   1   3   4   76.79    7.20
  -1  -3  -4   59.49    8.50
  -1  -3  -4   68.29    9.40
   1  -3   4   50.29    8.00
   1  -3   4   60.19    6.00
   1   3   5    4.00    4.60
  -1   3  -5   -2.60    5.30
  -1   3  -5    2.90    4.40
   1   3   5    1.20    6.70
  -1  -3  -5   -6.60    6.90
   1  -3   5    5.20    3.80
  -1  -3  -5    1.00    7.00
   1  -3   5    6.90    4.20
   1  -3   5    7.90    6.70
   1   3   6  301.27   16.00
  -1   3  -6  326.27   13.50
   1   3   6  302.97   13.20
  -1  -3  -6  305.37   17.70
  -1  -3  -6  314.87   18.30
   1  -3   6  312.97   13.00
   1  -3   6  279.87   17.90
   1  -3   6  316.97   12.90
  -1   3  -7  172.98   11.30
   1   3   7  179.08   10.40
   1  -3   7  198.78   10.80
  -1  -3  -7  177.38   15.20
   1  -3   7  200.08   16.70
   1  -3   7  185.68   10.40
   1   3   8   62.19    6.50
  -1   3  -8   65.69    8.40
   1  -3   8   38.70   11.20
  -1  -3  -8   51.29   11.40
   1  -3   8   70.99    7.80
   1  -3   8   60.49    7.20
  -1   3  -9  705.33   24.90
   1   3   9  711.63   21.30
   1   3   9  718.33   32.70
  -1   3  -9  697.53   24.60
  -1  -3  -9  712.33   31.10
   1  -3   9  684.93   31.80
   1  -3   9  708.63   24.10
   1  -3   9  681.63   23.40
  -1   3 -10    8.20    6.60
   1   3  10   10.20    3.50
   1   3  10   13.20   11.20
  -1   3 -10   14.60    6.20
   1  -3  10    4.20   11.10
  -1  -3 -10    6.20   10.00
   1  -3  10    8.30    6.20
   1   3  11   30.50   13.40
  -1   3 -11   29.50    7.70
  -1   3 -11   23.70    6.50
   1  -3  11   13.50   12.40
  -1  -3 -11   31.00   11.50
   1   3  12  111.39   18.40
  -1   3 -12   88.69   11.30
  -1  -3 -12  124.89   17.80
   1  -3  12   82.19   16.40
  -1   3 -13   15.70    8.30
   1   3  13   48.00   15.80
  -1  -3 -13   39.60   14.10
   1  -3  13   35.10   15.60
  -1   4  13   -0.70   13.10
   1  -4 -13   -2.70   11.30
  -1  -4  13    0.70   13.20
  -1   4  12   -8.40   12.20
   1   4 -12   -2.40    7.50
  -1  -4  12   -2.90   12.80
   1  -4 -12    5.60   11.40
  -1   4  11  -12.80   10.80
   1   4 -11    5.60    7.50
  -1  -4  11    5.50   12.00
   1  -4 -11    6.60   10.40
   1   4 -10   59.79   10.50
  -1   4  10   68.59    9.00
  -1   4  10   80.49   15.10
   1  -4 -10   56.39   13.20
  -1  -4  10   43.80   13.40
   1   4  -9  498.25   22.80
  -1   4   9  464.85   20.70
   1  -4  -9  496.25   26.50
  -1  -4   9  501.65   27.80
  -1   4   8   48.30    8.40
   1   4  -8   59.49   11.20
  -1  -4   8   52.79   11.90
   1  -4  -8   60.99   12.10
   1   4  -7  751.82   30.10
  -1   4   7  763.42   32.30
  -1   4   7  769.02   27.30
   1   4  -7  747.23   30.80
   1  -4  -7  769.22   30.70
  -1  -4   7  762.32   30.70
   1  -4  -7  771.52   32.20
  -1   4   6  146.59   13.50
   1   4  -6  183.78   14.70
   1   4  -6  122.89   12.70
  -1   4   6  158.48   12.70
  -1   4   6  170.18   16.20
   1  -4  -6  161.88   15.30
   1  -4  -6  158.68   15.50
   1   4  -5  218.58    9.00
  -1   4   5  242.38   17.70
   1   4  -5  253.27   16.60
  -1   4   5  241.08   14.50
   1   4  -5  256.47   15.70
  -1   4   5  213.18   14.60
   1  -4  -5  203.58   16.00
   1  -4  -5  235.58   17.60
  -1  -4   5  233.88    8.00
  -1  -4   5  234.88    8.10
  -1   4   4  777.02   29.40
  -1   4   4  804.02   27.40
  -1   4   4  743.13   28.40
   1   4  -4  848.02   28.30
   1   4  -4  820.92   22.80
   1   4  -4  804.32   28.80
   1  -4  -4  766.62   28.70
   1  -4  -4  792.42   29.70
  -1  -4   4  807.72   22.20
  -1  -4   4  788.32   22.00
  -1   4   3 2762.82   76.99
  -1   4   3 2843.42   76.09
   1   4  -3 2844.52   71.49
  -1   4   3 2836.82   75.59
   1   4  -3 2776.02   74.39
   1   4  -3 2762.42   75.79
   1  -4  -3 2851.61   77.19
   1  -4  -3 2731.43   76.09
  -1  -4   3 2880.01   75.99
  -1  -4   3 2759.82   70.99
  -1   4   2   23.00    7.20
   1   4  -2   26.00    5.30
  -1   4   2   25.20    7.70
  -1   4   2   26.30    7.30
   1   4  -2   17.20    6.70
  -1  -4   2   19.60    4.80
  -1  -4   2   31.10    6.80
   1  -4  -2   22.50    6.60
   1  -4  -2   22.50    6.70
  -1   4   1 1095.49   35.30
   1   4  -1 1171.58   32.60
  -1   4   1 1103.89   34.60
   1   4  -1 1078.19   34.40
  -1   4   1 1106.09   33.90
  -1  -4   1 1160.58   34.40
   1  -4  -1 1093.69   34.00
  -1  -4   1 1082.79   32.10
   1  -4  -1 1094.29   34.30
  -1   4   0    6.30    6.30
  -1   4   0    7.80    5.80
   1   4   0    0.40    5.30
   1   4   0    6.60    6.60
   1  -4   0    4.20    3.20
  -1  -4   0   18.20    5.80
  -1  -4   0   18.20    6.40
   1  -4   0    9.10    5.50
  -1   4  -1   30.50    7.20
   1   4   1   28.50    6.70
   1   4   1   37.60    8.00
  -1   4  -1   38.60    6.70
  -1  -4  -1   32.20    7.20
   1  -4   1   40.00    6.50
  -1  -4  -1   23.90    6.60
  -1   4  -2   25.20    7.60
  -1   4  -2   21.80    5.80
   1   4   2   35.20    8.70
  -1   4  -2   32.80    7.20
   1   4   2   22.70    6.50
   1  -4   2   19.60    5.50
  -1  -4  -2   24.80    7.40
  -1  -4  -2   25.70    8.00
  -1   4  -3  873.31   29.30
   1   4   3  885.91   30.00
  -1   4  -3  876.71   26.40
   1   4   3  831.22   30.80
  -1   4  -3  850.41   30.10
   1  -4   3  856.51   25.70
   1  -4   3  853.11   26.10
  -1  -4  -3  877.41   31.20
  -1  -4  -3  803.72   29.50
   1   4   4   83.69   11.30
   1   4   4  101.29   10.70
  -1   4  -4   75.69   10.00
  -1   4  -4   89.49    7.80
  -1   4  -4   89.49   10.90
   1  -4   4   87.59    7.10
  -1  -4  -4   75.99   10.00
  -1  -4  -4   93.59   12.20
   1  -4   4   95.09    7.80
  -1   4  -5  573.04   24.90
   1   4   5  553.74   26.00
  -1   4  -5  597.64   24.00
   1   4   5  548.45   23.80
   1  -4   5  572.84   18.90
  -1  -4  -5  547.35   23.90
   1  -4   5  587.44   24.80
  -1  -4  -5  570.24   25.70
   1  -4   5  576.74   19.10
   1   4   6   57.39   10.60
  -1   4  -6   56.69   10.40
  -1   4  -6   50.19    9.60
   1  -4   6   47.70    6.10
  -1  -4  -6   61.29   11.50
   1  -4   6   48.90    6.00
  -1  -4  -6   44.90   10.50
   1  -4   6   52.69   10.70
  -1   4  -7  271.27   20.70
   1  -4   7  270.77   12.30
   1  -4   7  273.47   20.50
  -1  -4  -7  272.47   20.00
   1  -4   7  292.57   12.90
  -1   4  -8  349.67   15.80
   1  -4   8  352.06   14.90
   1  -4   8  360.16   14.50
  -1  -4  -8  357.76   23.40
   1  -4   8  385.46   24.30
  -1   4  -9  252.77   13.40
   1   4   9  161.68   11.10
  -1  -4  -9  212.28   19.70
   1  -4   9  226.48   12.20
   1  -4   9  231.18   11.70
   1  -4   9  190.68   19.30
  -1   4 -10    3.00    6.10
  -1   4 -10    8.40    7.20
   1   4  10   -2.90   11.40
   1  -4  10    7.50   11.30
  -1  -4 -10    6.00   10.80
  -1   4 -11  219.38   15.30
   1   4  11  247.88   24.50
  -1   4 -11  259.57   15.20
  -1  -4 -11  241.88   22.70
   1  -4  11  285.87   25.70
   1   4  12   22.50   14.30
  -1   4 -12    8.00    7.00
  -1  -4 -12   -2.50   11.30
   1  -4  12    5.70   14.40
  -1   4 -13   49.20    8.90
   1   4  13   41.10   15.30
  -1  -4 -13   47.00   15.20
   1  -4  13   35.80   16.70
  -1   5  13   41.60   16.70
   1   5 -13   39.00   15.30
   1  -5 -13   47.90   15.60
  -1  -5  13   56.29   17.40
   1   5 -12   11.50   12.40
  -1   5  12   22.50   13.40
   1   5 -12    8.20    8.90
  -1  -5  12    7.40   13.70
   1  -5 -12    0.40   11.90
   1   5 -11    0.80    8.20
   1   5 -11   -1.70   11.60
  -1   5  11   -8.00   12.10
  -1  -5  11   -8.50   12.00
   1  -5 -11    8.00   11.70
   1   5 -10   18.20    9.10
   1   5 -10   -1.60   10.60
  -1   5  10    1.80    7.10
  -1  -5  10   13.70   12.40
   1  -5 -10   14.60   11.90
   1   5  -9   12.20   11.20
  -1   5   9   34.00    8.50
   1  -5  -9   42.70   12.30
   1   5  -8    1.10   10.20
  -1   5   8   12.80    8.10
   1  -5  -8   -4.70   10.40
  -1   5   7  205.98   18.80
  -1   5   7  267.07   16.90
   1   5  -7  226.48   18.40
   1  -5  -7  248.88   19.80
  -1   5   6  149.99   15.60
  -1   5   6  170.78   15.50
   1   5  -6  138.19   14.00
  -1   5   6  173.48   14.00
   1  -5  -6  149.29   15.90
  -1   5   5  827.02   33.30
   1   5  -5  921.91   33.10
   1   5  -5  776.82   30.80
   1   5  -5  805.92   24.70
  -1   5   5  908.21   32.70
  -1   5   5  866.61   30.60
  -1  -5   5  900.01   24.10
   1  -5  -5  890.91   33.90
  -1  -5   5  817.52   23.90
   1  -5  -5  813.92   32.40
  -1   5   4  104.09   10.90
  -1   5   4  102.79   12.40
   1   5  -4  119.79   12.00
  -1   5   4  144.29   14.40
   1   5  -4  105.89   11.70
   1   5  -4  105.39    8.70
   1  -5  -4  116.79   12.90
   1  -5  -4  111.39   12.70
  -1  -5   4  120.09    8.10
  -1   5   3    9.70    7.20
  -1   5   3   -0.90    7.20
   1   5  -3    2.30    7.20
  -1   5   3    3.30    8.60
   1   5  -3    1.50    5.00
   1  -5  -3    8.80    7.10
  -1  -5   3    2.00    4.40
   1  -5  -3   -3.60    7.70
  -1  -5   3    7.60    6.40
   1   5  -2  679.93   26.00
  -1   5   2  568.84   26.50
  -1   5   2  615.04   25.00
  -1   5   2  643.14   24.90
   1   5  -2  644.84   22.00
  -1  -5   2  639.14   24.70
   1  -5  -2  611.64   24.80
  -1  -5   2  637.44   21.50
   1  -5  -2  606.94   24.80
   1   5  -1   66.69    8.30
  -1   5   1   72.09   10.20
  -1   5   1   61.49    9.50
  -1   5   1   74.49    9.60
   1   5  -1   59.49   10.00
  -1  -5   1   77.19    9.90
   1  -5  -1   64.99    9.30
  -1  -5   1   63.49    8.10
   1  -5  -1   76.39    9.50
  -1   5   0   43.40    8.10
  -1   5   0   34.60    8.90
   1   5   0   48.00    9.80
   1   5   0   43.70    7.70
  -1  -5   0   49.90    7.90
  -1  -5   0   29.50    7.30
   1  -5   0   22.10    7.00
   1   5   1  849.52   28.10
  -1   5  -1  766.82   26.80
   1   5   1  755.12   29.60
  -1   5  -1  725.93   28.70
  -1  -5  -1  788.22   27.80
   1  -5   1  762.52   26.30
  -1  -5  -1  786.52   28.90
   1   5   2  731.93   27.10
   1   5   2  709.53   28.90
  -1   5  -2  754.02   27.10
  -1   5  -2  740.93   28.60
  -1   5  -2  754.72   25.20
   1  -5   2  736.73   24.70
  -1  -5  -2  729.73   28.50
  -1  -5  -2  707.43   27.20
   1   5   3  618.54   25.30
  -1   5  -3  587.24   25.70
  -1   5  -3  625.94   22.30
  -1   5  -3  615.04   24.90
   1   5   3  627.64   27.00
  -1  -5  -3  671.83   27.40
   1  -5   3  586.94   21.40
   1  -5   3  625.64   21.20
   1  -5   3  634.24   24.90
  -1  -5  -3  645.54   26.00
  -1   5  -4  153.48   10.60
  -1   5  -4  149.99   14.00
  -1   5  -4  116.99   12.40
   1   5   4  124.19   11.60
   1   5   4  157.58   14.50
   1   5   4  153.28   15.20
   1  -5   4  146.59    9.90
  -1  -5  -4  135.79   14.20
  -1  -5  -4  120.29   13.70
   1  -5   4  131.69   10.20
  -1   5  -5   -1.80    8.20
  -1   5  -5    7.90    9.00
   1   5   5   10.10    8.90
   1   5   5   26.00   10.80
   1   5   5    4.00    6.60
  -1   5  -5   14.40    6.00
   1  -5   5   20.90    5.60
   1  -5   5   20.90    5.60
  -1  -5  -5   12.90   10.00
  -1  -5  -5   17.90    9.70
   1   5   6   27.30    8.00
   1   5   6   32.00   12.60
  -1   5  -6   45.10   11.60
   1  -5   6   31.00    6.10
   1  -5   6   32.60    6.00
  -1  -5  -6   27.20    9.80
   1   5   7  265.77   16.70
  -1   5  -7  250.67   20.70
   1  -5   7  258.07   12.70
  -1  -5  -7  217.58   19.10
   1  -5   7  271.57   12.50
   1   5   8   92.39   10.30
  -1   5  -8  128.69   16.80
  -1  -5  -8   76.49   13.90
   1  -5   8  101.09    8.30
   1  -5   8  109.79   16.30
   1  -5   8  112.19    8.80
  -1   5  -9   38.20   13.20
   1   5   9   52.89    8.40
  -1  -5  -9   46.20   12.70
   1  -5   9   42.80    6.60
   1  -5   9   69.99   15.20
   1  -5   9   55.89    6.30
  -1   5 -10   38.60   13.60
   1  -5  10   16.00   13.30
  -1  -5 -10   13.80   11.90
  -1   5 -11   18.20   13.10
   1   5  11    7.70   13.60
  -1   5 -11   -2.80    7.70
   1  -5  11   -0.30   13.10
  -1  -5 -11   27.70   13.50
   1   5  12   24.60   15.40
  -1   5 -12   27.60   15.20
   1  -5  12   22.50   14.40
  -1  -5 -12    1.70   12.80
   1   6 -12    1.70   13.30
  -1   6  12    2.70   15.20
   1   6 -12   20.10   10.30
   1  -6 -12   10.70   13.30
   1   6 -11   16.30    9.90
   1   6 -11   42.40   14.30
   1  -6 -11   36.20   14.40
   1   6 -10   73.49   16.20
   1  -6 -10   74.09   15.90
  -1   6   9   57.79   11.10
   1   6  -9   63.29   14.40
   1  -6  -9   75.79   15.60
  -1   6   8   83.29   12.00
  -1   6   8   80.99   16.20
   1   6  -8   92.09   15.10
   1  -6  -8   79.29   15.80
   1   6  -7   84.49   14.50
  -1   6   7   90.09   12.70
  -1   6   7   60.19   14.90
   1  -6  -7   82.59   15.10
   1   6  -6   -0.70    4.60
   1   6  -6   -0.70    9.60
  -1   6   6  -11.20    7.90
  -1   6   6   -4.30   11.40
  -1  -6   6   -3.70    3.70
  -1  -6   6   -2.60    3.70
   1  -6  -6   -0.10   10.70
  -1   6   5   36.70   10.80
  -1   6   5    9.60    8.60
  -1   6   5   -1.50   11.00
   1   6  -5   25.90    5.90
   1   6  -5   13.00   10.00
  -1  -6   5   15.80    4.90
   1  -6  -5   40.70   11.60
  -1  -6   5   27.30    5.30
  -1   6   4  320.27   23.40
   1   6  -4  350.36   15.60
  -1   6   4  371.66   21.50
  -1   6   4  328.87   19.90
   1   6  -4  370.16   22.20
  -1  -6   4  353.86   14.90
   1  -6  -4  372.96   21.90
  -1  -6   4  379.96   21.30
  -1   6   3   84.59   11.90
   1   6  -3   83.99    8.90
   1   6  -3   76.19   12.20
  -1   6   3   75.49   13.10
  -1   6   3   62.59   10.50
   1  -6  -3   80.39   12.40
  -1  -6   3   68.89   10.60
   1  -6  -3   69.29   11.70
  -1  -6   3   71.49    8.20
  -1   6   2  361.56   20.20
   1   6  -2  322.17   16.30
  -1   6   2  339.47   19.10
  -1   6   2  312.17   21.90
   1   6  -2  350.76   21.50
  -1  -6   2  332.57   19.30
  -1  -6   2  335.67   16.40
   1  -6  -2  346.27   19.70
   1  -6  -2  356.06   19.40
  -1   6   1  368.56   23.00
  -1   6   1  421.46   21.70
   1   6  -1  400.96   19.00
  -1   6   1  404.86   20.40
   1   6  -1  426.76   22.70
   1  -6  -1  402.16   20.40
  -1  -6   1  390.06   18.30
  -1  -6   1  403.96   20.60
  -1   6   0    8.80    9.00
  -1   6   0    2.70    2.90
   1   6   0   18.50   10.30
  -1   6   0   12.70    7.60
   1   6   0   35.30    8.20
  -1  -6   0   15.40    8.10
  -1  -6   0   20.80    7.90
   1  -6   0    7.60    7.10
   1   6   1  185.88   14.70
  -1   6  -1  177.08   13.90
   1   6   1  163.98   17.00
  -1   6  -1  194.88   16.90
   1  -6   1  172.38   13.50
  -1  -6  -1  160.78   13.70
  -1  -6  -1  154.88   13.90
   1   6   2   65.39   12.80
  -1   6  -2   43.10    8.00
  -1   6  -2   49.90   11.00
   1   6   2   51.79   10.30
  -1  -6  -2   50.09   10.30
   1  -6   2   47.70    8.20
   1  -6   2   32.30    7.40
  -1  -6  -2   60.69   11.30
   1   6   3  299.47   22.30
  -1   6  -3  254.07   17.90
   1   6   3  265.37   17.50
  -1   6  -3  271.47   20.60
  -1   6  -3  281.27   15.90
   1   6   3  278.37   17.80
   1  -6   3  291.17   17.90
  -1  -6  -3  294.37   20.40
   1  -6   3  268.97   15.10
  -1  -6  -3  300.77   19.80
  -1   6  -4   59.19   11.30
  -1   6  -4   65.39    8.60
   1   6   4   63.29   11.80
   1   6   4   59.89   10.50
   1   6   4   58.59   13.00
   1  -6   4   60.19    8.00
  -1  -6  -4   38.20   11.00
   1  -6   4   58.39    7.50
   1   6   5   80.69   11.30
  -1   6  -5   73.69    9.00
   1   6   5   52.89   13.20
  -1   6  -5   57.69   13.00
   1  -6   5   73.09    8.40
  -1  -6  -5   59.69   12.40
   1  -6   5   84.29    8.40
   1   6   6  176.28   14.80
   1   6   6  169.68   18.60
  -1   6  -6  122.09   16.00
  -1  -6  -6  180.48   18.70
   1  -6   6  179.38   11.70
   1  -6   6  174.48   11.50
   1   6   7   39.20   14.90
  -1   6  -7   39.70   13.00
   1   6   7   57.09   10.30
   1  -6   7   54.39    7.10
  -1  -6  -7   36.30   13.10
   1  -6   7   40.30    6.50
  -1   6  -8   45.20   14.10
   1   6   8   43.70    9.60
   1  -6   8   41.80    6.10
  -1  -6  -8   39.70   12.90
   1  -6   8   41.70    6.50
  -1   6  -9   42.40   14.00
   1  -6   9   44.20    5.70
  -1  -6  -9   50.59   14.50
  -1   6 -10   16.00   12.80
  -1  -6 -10   -8.00   11.80
  -1   6 -11   76.39   17.40
  -1   6 -11   78.19   12.70
  -1  -6 -11   92.09   18.40
  -1   6 -12   22.40   15.10
   1   6  12  -14.90   14.30
  -1  -6 -12    5.90   13.30
   1   7 -11    4.30   10.40
   1   7 -11   -9.60   13.10
   1  -7 -11   20.30   14.60
   1   7 -10  -19.20   12.60
   1  -7 -10   -0.40   12.10
   1   7  -9  -28.20   10.50
  -1   7   9   -5.50   13.70
   1  -7  -9   14.30   12.60
  -1   7   8   67.69   16.70
   1   7  -8   80.19   15.20
   1  -7  -8   91.99   16.70
  -1   7   7   27.20   13.70
   1   7  -7   18.80   11.70
   1  -7  -7   26.60   12.60
  -1  -7   7   27.60    4.20
  -1  -7   7   24.90    4.10
   1   7  -6  134.49   10.70
  -1   7   6   96.39   17.00
   1   7  -6  135.79   16.90
   1  -7  -6  151.58   18.50
  -1  -7   6  134.19    9.30
  -1  -7   6  121.69    9.10
   1   7  -5  132.69   16.40
   1   7  -5  166.78   12.30
  -1   7   5  142.59   18.60
   1  -7  -5  136.79   16.60
  -1  -7   5  159.28   10.70
  -1  -7   5  160.68   11.10
   1   7  -4   87.49    9.80
  -1   7   4   93.49   13.90
   1   7  -4   81.99   14.20
  -1   7   4   76.39   16.10
  -1  -7   4   92.59    9.30
   1  -7  -4   70.69   13.00
   1   7  -3  191.68   14.30
   1   7  -3  176.18   17.30
  -1   7   3  184.88   16.40
  -1   7   3  159.08   17.80
   1  -7  -3  167.58   16.60
  -1  -7   3  195.38   13.50
   1   7  -2  113.29   11.80
  -1   7   2   79.99   14.30
  -1   7   2  121.79   14.40
   1   7  -2   94.29   14.70
   1  -7  -2   77.09   12.20
  -1  -7   2  102.19   11.10
  -1   7   1   24.80   11.50
   1   7  -1   11.40   11.10
   1   7  -1   12.70    7.80
  -1   7   1    1.50    8.50
   1  -7  -1   -5.30    8.20
  -1  -7   1   11.80    7.90
  -1   7   0  647.74   27.20
  -1   7   0  603.14   30.10
   1   7   0  622.34   26.40
   1   7   0  606.34   30.70
   1  -7   0  593.84   26.10
  -1  -7   0  573.74   25.30
   1   7   1  194.98   16.40
  -1   7  -1  191.48   15.70
   1   7   1  168.38   18.60
  -1   7  -1  163.58   17.00
  -1  -7  -1  187.38   15.70
   1  -7   1  166.78   14.30
  -1   7  -2  154.18   16.90
   1   7   2  148.09   18.20
  -1   7  -2  159.48   13.90
   1   7   2  136.59   15.10
   1  -7   2  152.48   13.30
  -1  -7  -2  123.09   14.30
  -1   7  -3   20.90   11.40
   1   7   3   22.30   10.00
  -1   7  -3   23.80    8.30
   1   7   3   10.50   11.80
   1  -7   3   14.60    7.50
  -1  -7  -3   11.70   10.80
  -1   7  -4   61.69   13.80
   1   7   4   69.79   15.00
  -1   7  -4   76.49   10.00
   1  -7   4   61.49    9.10
  -1  -7  -4   51.49   13.00
  -1   7  -5   19.50   11.70
   1   7   5   12.70   13.30
  -1   7  -5    8.10    7.10
   1  -7   5   -0.70    6.00
  -1  -7  -5    8.90   11.50
  -1   7  -6   26.60   12.50
   1   7   6   31.90   13.70
  -1   7  -6   20.80    7.50
  -1  -7  -6   -2.20   11.20
   1  -7   6   23.30    6.70
  -1   7  -7  195.48   20.60
   1   7   7  146.89   20.10
  -1  -7  -7  187.88   20.60
   1   7   8  111.29   19.80
  -1   7  -8  167.08   20.80
  -1  -7  -8  104.79   17.30
  -1   7  -9   -5.20   12.50
  -1  -7  -9    2.00   13.00
  -1   7 -10   65.79   17.20
  -1  -7 -10   34.40   15.60
  -1   7 -11   -2.60   14.00
  -1  -7 -11   -5.00   13.30
   1   8 -10   10.50   14.70
   1  -8 -10   -2.50   12.70
   1   8  -9   20.10   13.90
  -1   8   9    2.80   14.30
   1  -8  -9   -2.50   12.50
   1   8  -8   50.29   15.00
  -1   8   8   34.20   15.80
   1  -8  -8   14.20   13.90
  -1   8   7   79.49   18.60
   1   8  -7  109.79   17.20
   1  -8  -7  112.59   17.60
   1   8  -6    7.60    7.00
  -1   8   6   22.20   14.50
   1   8  -6   10.30   12.00
   1  -8  -6   17.70   11.30
  -1   8   5  -13.90   12.60
   1   8  -5   11.60    7.20
   1   8  -5   -2.40   11.30
   1  -8  -5    5.30   11.80
  -1  -8   5   -1.40    5.80
  -1   8   4  245.18   23.30
   1   8  -4  282.97   24.00
   1   8  -4  244.28   16.40
   1  -8  -4  220.78   20.50
  -1  -8   4  256.97   15.60
   1   8  -3   77.69   15.30
  -1   8   3   82.59   17.30
   1   8  -3   78.09   11.20
  -1   8   3   48.80   13.50
   1  -8  -3   98.29   14.90
  -1  -8   3   60.69   10.00
  -1   8   2  653.63   30.80
  -1   8   2  668.53   36.20
   1   8  -2  696.93   28.30
   1   8  -2  701.33   35.50
   1  -8  -2  681.93   31.00
  -1  -8   2  621.34   26.80
  -1   8   1   12.80   13.60
   1   8  -1    0.10   12.40
  -1   8   1    1.70    9.40
   1   8  -1   -7.30    8.70
   1  -8  -1   15.50   10.00
  -1  -8   1    0.60    8.30
  -1   8   0   69.59   15.20
   1   8   0   68.79   11.60
  -1   8   0   75.09   13.20
   1   8   0   55.19   14.90
   1  -8   0   76.09   12.80
  -1  -8   0   57.59   11.60
   1   8   1    7.50    9.50
  -1   8  -1   12.30    9.50
   1   8   1   -3.70   13.00
  -1   8  -1  -15.70   11.80
  -1  -8  -1    5.10    9.50
   1  -8   1   -3.90    8.30
  -1   8  -2    5.00    8.40
   1   8   2    1.40   13.50
   1   8   2   -1.00    9.30
  -1   8  -2   12.50   12.50
  -1  -8  -2    9.20   10.10
   1  -8   2  -11.30    8.00
  -1   8  -3   21.20    9.00
  -1   8  -3   26.20   13.40
   1   8   3   25.90   14.30
   1  -8   3    7.30    8.10
  -1  -8  -3   23.30   11.60
  -1   8  -4  151.38   18.70
   1   8   4  126.39   18.30
  -1   8  -4  138.29   13.20
  -1  -8  -4  123.79   16.80
   1  -8   4  140.69   13.10
   1   8   5    5.00   13.60
  -1   8  -5    1.30    7.40
  -1   8  -5    7.10   12.80
  -1  -8  -5   29.20   13.10
   1  -8   5   11.40    7.20
  -1   8  -6  197.28   21.20
   1   8   6  265.37   25.20
  -1  -8  -6  220.78   22.20
   1   8   7   17.60   15.00
  -1   8  -7    9.20   13.10
  -1  -8  -7   -0.50   12.30
   1   8   8   18.50   14.90
  -1   8  -8   -0.60   13.40
  -1  -8  -8   -3.30   12.80
  -1   8  -9   -3.00   13.90
  -1  -8  -9    2.30   14.30
  -1   8 -10   30.50   16.20
  -1  -8 -10   45.60   16.50
   1   9  -9    7.10   14.70
  -1   9   9   13.80   16.50
   1  -9  -9   -1.40   14.30
  -1   9   8   10.70   16.30
   1   9  -8   -1.30   13.50
   1  -9  -8    1.50   13.00
  -1   9   7    7.90   15.80
   1   9  -7   22.70   14.60
   1  -9  -7   19.60   14.50
  -1   9   6   27.20   16.30
   1   9  -6   40.40   14.60
   1  -9  -6   22.50   13.20
   1   9  -5   15.70   13.40
  -1   9   5   21.80   15.50
   1  -9  -5   38.30   13.10
  -1   9   4   55.19   17.10
   1   9  -4   84.99   17.30
   1  -9  -4   64.89   14.50
  -1   9   3   -7.20   14.50
   1   9  -3   -7.20   12.80
   1  -9  -3    8.10   10.80
  -1  -9   3  -15.20    6.80
   1   9  -2   -1.60    8.90
   1   9  -2   11.60   13.80
  -1   9   2   16.10   15.20
   1  -9  -2    3.10   10.50
  -1  -9   2    0.20    7.90
  -1   9   1   86.09   14.30
   1   9  -1   89.89   13.40
   1   9  -1   91.29   17.50
  -1   9   1  108.49   18.60
  -1  -9   1   79.59   12.80
   1  -9  -1   97.69   14.90
   1   9   0  202.38   18.70
   1   9   0  194.38   21.30
  -1   9   0  196.28   22.20
  -1   9   0  205.78   18.90
  -1  -9   0  189.08   17.70
   1  -9   0  205.18   18.60
   1   9   1    4.10   10.20
  -1   9  -1   16.00   10.00
   1   9   1   -3.80   13.30
  -1   9  -1    5.40   13.60
   1  -9   1   10.90    9.40
  -1  -9  -1    6.10   10.50
  -1   9  -2   83.49   17.50
  -1   9  -2   61.69   11.60
   1   9   2   42.00   16.10
  -1  -9  -2   67.19   14.10
   1  -9   2   51.49   11.40
   1   9   3   20.40   15.50
  -1   9  -3   33.60   14.60
   1  -9   3   13.00    8.90
  -1  -9  -3   31.40   12.80
   1   9   4    8.00   15.00
  -1   9  -4    3.70   12.80
  -1  -9  -4   15.70   11.90
  -1   9  -5  -13.90   12.30
   1   9   5   -0.80   14.60
  -1  -9  -5    2.50   12.60
   1   9   6   89.29   19.90
  -1   9  -6   64.39   16.70
  -1  -9  -6   62.29   16.30
  -1   9  -7   -0.90   14.50
   1   9   7   -0.40   15.60
  -1  -9  -7   14.60   14.70
   1   9   8   22.50   17.00
  -1   9  -8   50.19   17.60
  -1  -9  -8   51.79   16.70
  -1  10   7  -21.70   15.40
   1  10  -7    4.00   14.70
   1 -10  -7   -5.00   14.30
  -1  10   6   12.60   16.40
   1  10  -6   -4.90   13.60
   1 -10  -6   -2.40   13.70
   1  10  -5   -2.20   14.30
  -1  10   5   -1.20   15.90
   1 -10  -5   16.90   13.60
  -1  10   4   13.90   16.80
   1  10  -4   41.10   16.60
   1 -10  -4   38.30   14.80
  -1  10   3  -15.40   15.40
   1  10  -3   -6.30   15.10
   1 -10  -3   -7.40   11.40
  -1  10   2   53.29   18.60
   1  10  -2   34.70   16.80
   1 -10  -2   63.19   13.90
  -1  10   1   40.10   17.40
   1  10  -1   36.30   17.10
   1 -10  -1   33.00   12.90
  -1 -10   1   64.09   12.90
   1  10   0   13.60   15.50
  -1  10   0   12.20   15.60
  -1 -10   0    5.90   10.60
   1 -10   0   16.60   11.50
   1  10   1   -0.70   15.50
  -1  10  -1   -1.40   15.70
   1 -10   1   -2.20    9.20
  -1 -10  -1   -8.20   10.20
   1  10   2   10.50   16.20
  -1  10  -2   -0.60   14.50
  -1 -10  -2    4.40   11.30
  -1  10  -3   50.89   17.60
   1  10   3   61.59   18.40
  -1 -10  -3   39.90   14.20
   1  10   4    5.40   15.90
  -1  10  -4    6.20   15.20
  -1 -10  -4   16.10   13.40
   1  10   5   30.50   17.70
  -1  10  -5   36.40   16.20
  -1 -10  -5   44.10   15.60
  -1  10  -6  -19.60   14.20
   1  10   6   12.40   16.80
  -1 -10  -6    0.10   13.00
   1  10   7   19.30   17.80
  -1  10  -7   21.90   16.40
   1  11  -4    4.30   17.00
  -1  11   4    0.00   17.20
   1 -11  -4   -4.60   12.80
   1  11  -3  -39.40   15.30
  -1  11   3  -24.00   16.30
   1 -11  -3   21.10   13.30
  -1  11   2   -4.90   16.60
   1  11  -2   -1.40   17.10
   1 -11  -2   14.30   12.90
  -1  11   1    0.50   17.30
   1  11  -1    3.00   17.10
  -1  11   0    9.60   17.80
   1  11   0   26.10   18.60
  -1  11  -1  -14.20   16.30
   1  11   1   -2.70   17.10
  -1  11  -2  -17.90   16.20
   1  11   2   -6.40   16.70
  -1 -11  -2    3.60   12.50
   1  11   3    5.10   17.80
  -1  11  -3  -13.90   16.40
  -1 -11  -3   11.40   13.20
   1  11   4  -21.60   15.90
  -1  11  -4  -44.50   14.10
  -1 -11  -4   48.10   16.30
   2   0 -15   -7.20    8.40
  -2   0  15   12.10   13.80
  -2   0  14    1.20   12.60
   2   0 -14    7.20    8.70
   2   0 -13    5.50    8.20
  -2   0  13   -2.20   11.90
   2   0 -12  198.78   15.70
  -2   0  12  218.88   20.60
   2   0 -12  192.28   13.40
   2   0 -11   -1.20    6.00
  -2   0  11    3.30   10.60
   2   0 -11    5.10    7.20
   2   0 -10  298.87   15.60
   2   0 -10  332.37   17.00
  -2   0  10  288.07   21.00
  -2   0  10  304.87   15.80
   2   0  -9   -2.20    6.00
   2   0  -9    6.20    5.60
  -2   0   9    3.50    5.40
  -2   0   9    0.10    8.50
  -2   0   8   43.50    6.70
  -2   0   8   53.49    9.70
  -2   0   8   51.49    6.60
   2   0  -8   27.10    6.70
   2   0  -8   50.19    7.00
  -2   0   7   14.00    4.90
   2   0  -7    5.50    5.00
  -2   0   7    9.70    7.00
  -2   0   7    3.90    4.20
   2   0  -7    8.90    5.10
   2   0  -6 2582.74   66.49
   2   0  -6 2411.36   64.89
  -2   0   6 2550.34   65.69
   2   0  -6 2456.25   65.59
  -2   0   6 2543.35   66.39
   2   0  -5    4.20    5.00
  -2   0   5    5.40    5.10
  -2   0   5   -1.10    4.20
   2   0  -5    2.90    4.00
   2   0  -5   -2.60    4.50
  -2   0   5    1.80    3.40
   2   0  -4 5885.71  148.19
   2   0  -4 6078.39  145.49
  -2   0   4 6010.70  148.19
  -2   0   4 5817.52  145.29
  -2   0   4 6031.80  146.89
   2   0  -4 6042.20  146.99
  -2   0   3    3.70    3.50
  -2   0   3   -6.10    4.30
  -2   0   3    3.80    3.80
   2   0  -3    3.50    3.70
   2   0  -3   -0.60    3.50
   2   0  -3   -1.70    4.30
  -2   0   2 1305.67   34.80
  -2   0   2 1300.77   33.70
   2   0  -2 1300.07   32.20
   2   0  -2 1292.87   34.80
   2   0  -2 1294.87   33.70
  -2   0   2 1307.37   32.20
  -2   0   1    1.70    2.60
   2   0  -1   -1.50    2.70
  -2   0   1    0.50    0.80
   2   0  -1    3.60    2.50
  -2   0   1   -1.70    2.50
   2   0  -1   -3.00    2.30
  -2   0   0 5393.46  131.09
   2   0   0 5315.87  131.09
   2   0   0 5311.87  131.39
  -2   0   0 5378.76  131.49
  -2   0  -1    0.70    3.60
   2   0   1    3.00    3.60
  -2   0  -1    1.20    2.60
   2   0   1   -2.80    2.00
   2   0   1    2.20    2.60
  -2   0  -2 4395.26  113.79
   2   0   2 4646.33  111.19
  -2   0  -2 4573.94  111.09
   2   0   2 4560.44  112.19
   2   0   3    0.00    3.10
   2   0   3   -1.40    5.60
  -2   0  -3    1.60    5.10
  -2   0  -4 4941.21  127.39
   2   0   4 5074.99  127.39
   2   0   4 5150.48  126.69
   2   0   5   -8.20    6.20
  -2   0  -5    7.20    6.00
   2   0   5   -4.80    4.70
  -2   0  -6  490.35   20.30
   2   0   6  495.15   19.60
   2   0   6  455.55   21.60
   2   0   7   -2.20    8.00
   2   0   7   -2.80    5.70
  -2   0  -7   -1.10    6.80
   2   0   8 1045.20   37.90
  -2   0  -8  991.30   34.70
  -2   0  -9    2.10    8.30
   2   0   9   -1.00   10.50
   2   0  10  529.85   29.00
  -2   0 -10  505.55   24.70
   2   0  11    0.40   11.40
  -2   0 -11    5.60    9.00
  -2   0 -12   10.40    9.60
   2   0  12   22.80   13.80
  -2   0 -13   -4.10    9.50
   2   0  13  -19.00   12.60
  -2   1  15  -23.10   12.10
   2   1 -15   -8.40    7.30
   2  -1 -15    0.30    9.20
  -2  -1  15   -6.60   12.70
   2   1 -14   15.50    8.50
  -2   1  14   31.10   14.60
  -2  -1  14   22.80   14.30
   2  -1 -14   21.40   10.70
   2   1 -13   -6.90    6.80
   2   1 -13   -5.20    6.00
  -2   1  13    8.30   12.30
  -2  -1  13   -6.00   11.50
   2  -1 -13  -13.00    7.90
   2   1 -12   -7.70    5.80
   2   1 -12   -0.10    6.70
  -2   1  12    0.30   11.10
   2  -1 -12    6.90    6.20
  -2  -1  12    4.30   11.20
   2  -1 -12    9.90    8.60
   2   1 -11    5.50    6.80
  -2   1  11   12.60    5.00
   2   1 -11    0.10    6.30
  -2   1  11    2.40   10.90
   2  -1 -11   -7.20    8.00
  -2  -1  11   -7.80    9.90
  -2  -1  11   12.20    5.80
   2  -1 -11   -3.20    6.30
   2   1 -10   48.70    7.90
   2   1 -10   40.70    7.70
  -2   1  10   52.79   12.00
  -2  -1  10   54.49    7.30
   2  -1 -10   49.30    9.80
   2  -1 -10   53.79    8.10
  -2  -1  10   48.50   12.10
  -2   1   9  191.28   15.70
   2   1  -9  160.48   11.00
  -2   1   9  165.98   13.00
   2   1  -9  158.98   12.30
   2   1  -9  175.38   15.70
   2  -1  -9  185.98   16.30
  -2  -1   9  170.08   10.40
  -2  -1   9  204.68   17.00
   2  -1  -9  201.38   14.40
   2  -1  -9  177.78   12.50
  -2   1   8  462.35   19.00
   2   1  -8  432.26   16.00
   2   1  -8  447.66   18.10
  -2   1   8  424.96   16.90
  -2   1   8  452.35   21.30
   2   1  -8  490.35   21.30
   2  -1  -8  445.16   21.70
  -2  -1   8  427.36   21.00
   2  -1  -8  441.06   19.20
   2  -1  -8  441.06   17.60
  -2  -1   8  436.66   15.60
  -2   1   7  166.78   11.10
  -2   1   7  143.69   12.20
   2   1  -7  139.69   11.40
   2   1  -7  133.09   10.90
  -2   1   7  149.79    9.70
   2   1  -7  139.59    8.60
  -2  -1   7  129.69    7.50
   2  -1  -7  138.29   11.50
  -2  -1   7  129.19   11.30
   2  -1  -7  170.78   13.50
   2  -1  -7  157.78   10.80
   2   1  -6  924.61   25.20
  -2   1   6  871.41   27.10
   2   1  -6  910.51   28.90
  -2   1   6  967.90   28.40
   2   1  -6  883.81   27.80
  -2   1   6  874.11   28.90
   2  -1  -6  863.61   27.40
   2  -1  -6  918.21   28.30
  -2  -1   6  915.11   24.80
  -2  -1   6  876.41   28.90
   2  -1  -6  932.11   30.20
   2   1  -5   13.00    5.10
  -2   1   5   10.00    4.40
   2   1  -5   11.80    5.20
  -2   1   5    1.60    3.40
  -2   1   5    0.60    5.20
   2   1  -5   11.50    3.30
  -2  -1   5   14.80    3.10
   2  -1  -5    2.80    5.70
  -2  -1   5    0.90    5.30
   2  -1  -5    6.10    5.40
   2  -1  -5    7.30    4.70
  -2   1   4 3654.13   94.59
   2   1  -4 3751.92   95.09
  -2   1   4 3876.01   94.99
   2   1  -4 3629.04   91.59
   2   1  -4 3862.21   93.29
  -2  -1   4 3724.63   91.39
  -2  -1   4 3724.23   93.09
   2  -1  -4 3778.82   94.79
   2  -1  -4 3693.53   94.89
   2  -1  -4 3768.82   95.49
   2   1  -3    5.50    2.40
   2   1  -3    2.70    2.30
   2   1  -3   -2.80    4.20
  -2   1   3    6.20    4.80
   2   1  -3    1.60    4.80
  -2   1   3   -5.50    4.50
  -2   1   3    3.80    4.80
   2  -1  -3    0.90    4.70
  -2  -1   3    7.40    4.40
   2  -1  -3    3.10    4.80
   2  -1  -3    0.80    4.60
   2   1  -2 6377.26  156.58
   2   1  -2 6278.57  158.98
   2   1  -2 6541.35  154.78
   2   1  -2 6428.76  159.88
  -2   1   2 6428.16  161.18
  -2   1   2 6548.04  159.18
   2  -1  -2 6296.27  158.38
   2  -1  -2 6387.76  158.48
   2  -1  -2 6606.34  159.08
  -2  -1   2 6539.65  157.58
   2   1  -1 2202.78   55.09
  -2   1   1 2216.18   56.49
   2   1  -1 2211.68   55.49
   2   1  -1 2204.68   56.49
  -2   1   1 2189.88   55.59
  -2  -1   1 2172.78   54.99
   2  -1  -1 2191.68   56.49
  -2  -1   1 2227.38   55.49
   2  -1  -1 2252.17   55.59
   2  -1  -1 2198.08   56.69
  -2   1   0 2584.74   64.19
  -2   1   0 2584.34   66.39
   2   1   0 2744.63   66.59
  -2   1   0 2609.34   66.49
   2   1   0 2679.63   66.29
  -2   1   0 2576.24   66.09
  -2   1   0 2665.63   66.59
   2   1   0 2667.63   65.79
   2  -1   0 2550.34   66.09
   2  -1   0 2620.14   66.59
   2  -1   0 2633.54   64.29
  -2  -1   0 2659.83   66.49
   2  -1   0 2626.44   66.49
  -2  -1   0 2641.84   65.89
  -2   1  -1 1802.42   45.70
  -2   1  -1 1734.73   45.20
  -2   1  -1 1689.63   46.20
   2   1   1 1734.53   45.10
   2   1   1 1781.42   46.70
   2  -1   1 1785.52   45.80
  -2  -1  -1 1776.82   46.40
   2  -1   1 1798.52   46.40
   2  -1   1 1766.12   46.30
   2  -1   1 1774.62   45.20
  -2  -1  -1 1790.92   46.80
   2   1   2  153.58   10.00
   2   1   2  158.68    6.90
  -2   1  -2  163.18    8.30
  -2   1  -2  146.99    9.50
  -2   1  -2  154.08   10.10
  -2  -1  -2  148.99   10.70
   2  -1   2  150.18   10.20
  -2  -1  -2  135.19   10.50
   2  -1   2  160.58    9.00
   2   1   3   55.79    3.90
  -2   1  -3   24.50    5.20
  -2   1  -3   46.40    6.30
  -2   1  -3   56.99    4.80
  -2  -1  -3   54.49    7.60
   2  -1   3   60.49    7.60
   2  -1   3   55.99    6.20
  -2   1  -4 1310.37   36.00
   2   1   4 1237.58   37.10
  -2   1  -4 1225.58   32.50
  -2   1  -4 1190.88   36.50
  -2  -1  -4 1248.18   37.00
   2  -1   4 1273.47   35.40
   2  -1   4 1202.08   36.80
   2   1   5 1318.27   38.80
  -2   1  -5 1273.77   37.70
  -2   1  -5 1326.67   33.60
   2   1   5 1326.77   39.90
   2  -1   5 1263.77   39.30
   2  -1   5 1294.67   37.30
  -2  -1  -5 1213.58   38.70
   2   1   6 2475.05   70.09
  -2   1  -6 2554.14   63.09
  -2   1  -6 2490.35   68.29
  -2   1  -6 2560.14   70.09
   2   1   6 2553.94   69.49
  -2   1  -6 2547.55   63.09
   2  -1   6 2545.05   70.29
  -2  -1  -6 2486.65   69.69
   2  -1   6 2562.94   67.99
  -2   1  -7  234.38   14.80
   2   1   7  233.78   18.10
  -2   1  -7  279.67   16.70
   2   1   7  236.18   15.40
  -2  -1  -7  241.98   16.10
   2  -1   7  243.28   13.90
   2  -1   7  237.48   18.00
  -2   1  -8  184.58   15.00
   2   1   8  172.18   15.90
  -2  -1  -8  178.48   15.30
   2  -1   8  179.38   16.90
   2  -1   8  183.78   13.20
  -2   1  -9    6.80    8.20
   2   1   9    6.40   11.30
  -2  -1  -9    1.80    8.50
   2  -1   9    3.40   10.10
  -2   1 -10   18.80    8.90
   2   1  10    9.40   11.90
  -2  -1 -10    4.20    9.50
   2  -1  10    4.40   11.40
   2   1  11  150.38   18.80
  -2   1 -11  171.18   16.00
  -2  -1 -11  117.09   15.20
   2  -1  11  121.49   17.20
  -2   1 -12   82.69   12.70
   2   1  12   98.59   17.30
   2  -1  12   69.49   16.20
  -2  -1 -12   76.89   14.00
  -2   1 -13   39.90   11.70
   2   1  13   89.89   18.90
  -2  -1 -13   68.09   14.30
   2  -1  13   55.89   16.10
  -2   2  14   18.00   14.50
   2   2 -14    1.40    6.60
   2  -2 -14   13.10   10.10
  -2  -2  14   16.00   13.30
  -2   2  13   64.39   15.30
   2   2 -13   62.69    9.50
   2   2 -13   53.89    8.60
   2  -2 -13   69.39   13.10
  -2  -2  13   75.89   15.90
   2   2 -12   59.49    8.10
  -2   2  12   55.29   13.80
   2   2 -12   55.69    9.20
  -2  -2  12   74.39   14.80
  -2  -2  12   68.59    7.10
   2  -2 -12   65.79    8.90
   2  -2 -12   62.39   12.10
   2   2 -11   67.59    7.90
  -2   2  11   70.19    8.40
   2   2 -11   78.29    9.90
  -2   2  11   71.29   13.80
   2  -2 -11   69.09    9.20
  -2  -2  11   62.89    6.50
  -2  -2  11   69.39   13.80
   2  -2 -11   73.49   12.10
  -2   2  10   72.99    8.40
   2   2 -10   85.49    7.60
  -2   2  10   47.70   12.40
   2   2 -10   66.09    9.40
   2  -2 -10   71.39    9.20
  -2  -2  10   75.99    6.40
  -2  -2  10   75.19   12.70
   2  -2 -10   87.99   12.60
  -2   2   9   46.60    7.00
   2   2  -9   66.99    9.00
  -2   2   9   65.39   11.90
   2   2  -9   87.49    7.10
  -2  -2   9   70.19    5.50
  -2  -2   9   64.59   11.90
   2  -2  -9   49.40   10.10
   2  -2  -9   55.69    8.50
   2   2  -8    6.30    6.00
   2   2  -8   -3.60    6.90
  -2   2   8   -1.90    3.00
   2   2  -8   14.40    4.00
  -2   2   8   20.80    8.50
  -2   2   8    1.80    6.50
  -2  -2   8    6.50    8.30
  -2  -2   8    1.00    2.00
   2  -2  -8    3.20    6.10
   2  -2  -8   12.40    8.40
   2  -2  -8    9.10    7.60
   2   2  -7  199.28   13.20
  -2   2   7  219.78   15.30
  -2   2   7  228.48   14.20
   2   2  -7  201.58    8.20
   2   2  -7  214.48   14.50
   2  -2  -7  228.08   16.50
  -2  -2   7  178.58   14.30
   2  -2  -7  223.68   12.90
   2  -2  -7  215.28   14.30
  -2   2   6 1209.28   35.10
   2   2  -6 1214.38   36.50
  -2   2   6 1165.08   36.10
   2   2  -6 1166.98   35.70
   2  -2  -6 1212.38   37.70
  -2  -2   6 1164.78   36.20
   2  -2  -6 1146.59   36.60
   2  -2  -6 1212.38   35.30
  -2   2   5  195.38   11.00
   2   2  -5  166.78   11.10
  -2   2   5  156.38   13.10
  -2   2   5  174.48   11.70
   2   2  -5  192.28   12.00
   2  -2  -5  162.58   12.10
   2  -2  -5  149.99   12.50
  -2  -2   5  177.98   11.80
   2  -2  -5  176.68   11.50
  -2   2   4 1014.80   30.80
  -2   2   4 1024.60   30.10
   2   2  -4 1004.20   29.80
   2  -2  -4  996.10   30.90
   2  -2  -4 1005.30   30.20
  -2  -2   4 1019.20   30.00
   2  -2  -4  974.40   30.50
   2   2  -3  214.38   10.70
  -2   2   3  211.58   12.60
  -2   2   3  210.98   11.20
   2   2  -3  216.78   11.20
   2   2  -3  214.88    6.90
  -2   2   3  227.48   11.90
   2  -2  -3  207.38   12.40
   2  -2  -3  193.58   12.10
   2  -2  -3  215.78   12.90
   2   2  -2  191.38   10.20
  -2   2   2  223.68   11.90
  -2   2   2  204.78   11.90
   2   2  -2  188.48    7.90
  -2   2   2  199.28   11.00
   2  -2  -2  220.88   12.20
   2  -2  -2  197.68   11.70
  -2  -2   2  180.68    7.80
  -2  -2   2  202.18   10.10
   2  -2  -2  220.48   12.20
   2   2  -1 4738.73  117.69
   2   2  -1 4756.42  116.69
  -2   2   1 4788.82  118.39
  -2   2   1 4601.04  118.29
   2  -2  -1 4638.74  118.59
  -2  -2   1 4851.01  117.79
  -2  -2   1 4596.54  116.59
   2  -2  -1 4754.12  118.29
   2  -2  -1 4807.22  118.29
  -2   2   0    3.80    5.10
   2   2   0   -1.30    4.50
  -2   2   0   10.50    5.40
  -2   2   0   11.50    5.00
   2   2   0   15.50    5.30
   2  -2   0    5.60    4.80
   2  -2   0   -0.50    4.50
  -2  -2   0    2.80    4.60
   2  -2   0    1.80    5.90
  -2  -2   0   12.50    5.20
   2   2   1 1760.52   47.60
  -2   2  -1 1783.62   46.90
   2   2   1 1760.12   47.50
  -2   2  -1 1715.53   47.70
  -2   2  -1 1753.82   47.40
  -2   2  -1 1771.72   46.30
   2  -2   1 1745.43   46.80
   2  -2   1 1736.13   46.70
  -2  -2  -1 1770.12   47.70
   2  -2   1 1790.12   46.30
  -2  -2  -1 1824.22   48.00
   2   2   2 2397.46   64.19
  -2   2  -2 2380.76   62.49
  -2   2  -2 2428.76   62.59
   2   2   2 2582.04   64.49
  -2   2  -2 2362.16   62.79
  -2   2  -2 2424.66   62.79
  -2   2  -2 2340.57   64.19
  -2  -2  -2 2517.05   64.49
   2  -2   2 2453.85   62.59
  -2  -2  -2 2366.66   63.99
   2  -2   2 2401.06   62.59
   2  -2   2 2357.46   62.59
   2   2   3 1208.68   36.00
  -2   2  -3 1141.09   33.90
  -2   2  -3 1238.28   34.00
  -2  -2  -3 1192.18   36.10
   2  -2   3 1229.38   35.40
   2  -2   3 1237.28   34.10
   2   2   4  332.17   11.40
  -2   2  -4  295.27   13.90
  -2   2  -4  318.67   13.00
  -2   2  -4  325.47   15.20
   2   2   4  324.27   15.70
   2  -2   4  308.57   13.70
  -2  -2  -4  315.77   16.50
  -2  -2  -4  330.77   16.10
   2  -2   4  315.77   13.40
   2  -2   4  317.17   16.10
  -2   2  -5  584.94   22.70
  -2   2  -5  592.24   18.80
   2   2   5  568.34   16.70
  -2   2  -5  539.55   20.00
   2  -2   5  549.65   22.90
   2  -2   5  553.84   19.70
  -2  -2  -5  537.85   22.50
   2  -2   5  572.34   20.20
  -2  -2  -5  562.54   23.50
  -2   2  -6  181.28   11.80
  -2   2  -6  153.88    9.60
   2   2   6  140.99    6.40
   2   2   6  151.58   11.50
  -2   2  -6  143.19   13.20
   2  -2   6  159.68   10.80
   2  -2   6  129.99   13.10
  -2  -2  -6  167.98   14.20
  -2  -2  -6  120.69   12.40
   2   2   7   70.99   12.20
  -2   2  -7   63.39   10.10
  -2   2  -7   74.59    9.10
   2   2   7   65.89   10.10
  -2   2  -7   70.49    6.80
   2  -2   7   69.39   11.40
  -2  -2  -7   83.59   11.30
  -2  -2  -7   65.49   11.70
   2  -2   7   78.29    8.80
  -2   2  -8  188.68   10.00
   2   2   8  211.58   18.90
  -2   2  -8  189.48   14.30
  -2   2  -8  223.68   10.80
  -2  -2  -8  186.98   16.10
   2  -2   8  218.98   13.40
   2  -2   8  172.08   16.90
   2   2   9   15.50   11.90
  -2   2  -9   18.80    4.90
  -2   2  -9   12.50    7.70
  -2   2  -9   16.10    4.40
   2  -2   9   11.80   11.50
  -2  -2  -9   18.00   10.10
   2   2  10   58.69   14.50
  -2   2 -10   79.89   11.10
  -2  -2 -10   54.59   12.70
   2  -2  10   75.09   15.00
   2   2  11   10.00   12.70
  -2   2 -11    7.40    8.10
  -2  -2 -11   17.10   11.30
   2  -2  11   12.20   13.10
   2   2  12   20.20   13.70
  -2   2 -12   19.10    9.40
   2  -2  12    4.40   13.30
  -2  -2 -12   28.50   12.80
   2   2  13    8.70   13.80
  -2   2 -13    1.90    9.30
  -2  -2 -13  -11.60   10.90
   2  -2  13   16.40   14.60
  -2   3  14   -0.50   12.70
  -2  -3  14   23.80   14.50
   2  -3 -14    3.60   11.10
  -2   3  13    2.30   12.20
   2   3 -13    6.80    7.30
   2   3 -13    2.20    4.80
  -2  -3  13  -18.10   11.70
   2  -3 -13    3.00   11.00
   2   3 -12   89.59   11.50
  -2   3  12  107.79   16.80
   2   3 -12   94.59    7.40
  -2  -3  12  111.79   17.50
   2  -3 -12   91.39   14.50
   2  -3 -12   84.89   10.10
  -2   3  11   18.30    6.30
   2   3 -11   13.50    4.30
   2   3 -11    1.70    7.50
  -2   3  11   -1.10   10.70
   2  -3 -11   14.70    7.40
  -2  -3  11   15.10   11.50
   2  -3 -11  -18.70    8.80
   2   3 -10   -1.70    3.50
  -2   3  10   -1.20   10.80
  -2   3  10    4.30    5.90
   2   3 -10  -10.10    7.00
   2  -3 -10   -0.60    9.30
   2  -3 -10   -1.10    7.30
  -2  -3  10    5.80   10.90
  -2   3   9  634.54   23.30
  -2   3   9  619.64   27.70
   2   3  -9  620.84   24.90
   2  -3  -9  549.85   26.70
  -2  -3   9  624.44   28.20
   2  -3  -9  604.84   23.90
   2   3  -8   69.69    9.90
  -2   3   8   64.49    9.00
   2   3  -8   37.70    9.40
   2  -3  -8   45.00   11.00
   2  -3  -8   49.50    8.60
   2  -3  -8   53.39   10.30
  -2  -3   8   48.30   10.50
   2   3  -7  464.85   21.30
   2   3  -7  431.86   19.60
  -2   3   7  441.66   18.80
  -2   3   7  465.05   20.50
   2  -3  -7  409.26   19.00
  -2  -3   7  428.46   21.10
   2  -3  -7  442.26   22.40
   2  -3  -7  465.85   21.50
  -2   3   6  448.26   17.90
  -2   3   6  387.56   20.30
   2   3  -6  417.46   19.10
   2   3  -6  349.47   18.50
   2  -3  -6  403.06   20.40
   2  -3  -6  437.36   19.80
  -2  -3   6  393.56   19.00
   2  -3  -6  389.46   18.30
   2   3  -5 1047.40   33.30
  -2   3   5  993.50   33.80
   2   3  -5 1081.49   33.20
  -2   3   5 1033.10   33.40
   2  -3  -5 1080.39   34.80
   2  -3  -5 1036.80   34.10
   2  -3  -5 1020.40   32.70
  -2   3   4  688.93   25.10
  -2   3   4  748.13   25.20
   2   3  -4  696.13   24.00
   2   3  -4  674.63   24.20
   2   3  -4  691.53   18.50
   2  -3  -4  709.13   24.50
   2  -3  -4  701.63   25.70
   2  -3  -4  746.03   25.50
  -2   3   3   18.80    7.20
  -2   3   3   -4.20    3.70
  -2   3   3   13.80    6.50
   2   3  -3    6.10    5.40
   2   3  -3   10.60    3.20
  -2  -3   3   15.30    3.10
   2  -3  -3   14.10    6.40
   2  -3  -3   25.30    7.10
   2  -3  -3   23.00    7.00
  -2  -3   3   12.30    5.10
  -2   3   2 4936.81  129.69
   2   3  -2 5052.49  128.79
   2   3  -2 5052.09  125.99
  -2   3   2 5096.89  129.19
  -2  -3   2 5149.88  125.99
   2  -3  -2 5166.98  129.29
   2  -3  -2 4998.90  129.49
   2  -3  -2 5063.49  129.39
  -2  -3   2 5412.26  128.99
   2   3  -1 1349.16   36.90
  -2   3   1 1375.46   39.00
   2   3  -1 1349.36   38.60
  -2   3   1 1277.57   38.80
  -2  -3   1 1381.06   38.30
  -2  -3   1 1364.36   36.90
   2  -3  -1 1357.76   38.90
   2  -3  -1 1343.97   38.70
   2  -3  -1 1349.56   39.60
   2   3   0  360.56   16.20
  -2   3   0  371.06   15.30
  -2   3   0  361.46   16.20
   2   3   0  367.86   14.50
  -2   3   0  357.46   16.20
   2  -3   0  338.57   15.30
  -2  -3   0  389.36   15.50
  -2  -3   0  363.56   14.80
   2  -3   0  358.86   15.10
   2   3   1   77.69    8.70
  -2   3  -1   89.89    9.10
  -2   3  -1   65.79    7.30
   2   3   1   73.39    8.00
  -2   3  -1   75.29    8.10
  -2  -3  -1   54.99    7.70
   2  -3   1   60.39    7.40
   2  -3   1   76.49    7.50
  -2  -3  -1   82.79    8.90
   2   3   2   44.70    7.70
  -2   3  -2   41.80    6.40
  -2   3  -2   40.00    7.20
  -2   3  -2   32.30    6.50
   2   3   2   26.20    6.90
   2  -3   2   34.40    5.80
  -2  -3  -2   30.00    6.60
   2   3   3   77.89    9.20
  -2   3  -3  105.99    9.20
  -2   3  -3  103.49   10.50
   2   3   3  112.99   10.60
  -2   3  -3  115.39   10.80
  -2   3  -3  115.39    8.80
   2  -3   3  102.79   10.00
   2  -3   3  111.09    9.00
  -2  -3  -3   93.79   10.10
   2  -3   3  104.29    8.50
  -2  -3  -3  104.29   10.40
  -2   3  -4  633.24   21.10
  -2   3  -4  623.54   22.10
  -2   3  -4  636.74   24.80
   2   3   4  633.04   24.10
  -2   3  -4  591.84   23.50
   2   3   4  612.24   25.10
  -2  -3  -4  637.24   25.00
   2  -3   4  628.44   20.90
  -2  -3  -4  579.64   24.10
   2  -3   4  602.14   23.80
   2  -3   4  629.74   20.70
  -2   3  -5 1112.09   35.90
  -2   3  -5 1083.99   33.00
   2   3   5 1115.39   36.20
  -2   3  -5 1042.50   32.30
   2   3   5 1093.79   31.10
   2  -3   5 1062.79   32.10
  -2  -3  -5 1066.79   36.50
   2  -3   5 1107.49   32.30
   2  -3   5 1034.20   35.60
  -2  -3  -5 1121.99   37.30
  -2   3  -6  237.98   13.60
  -2   3  -6  236.18   13.40
  -2   3  -6  255.07   17.10
   2   3   6  268.87   16.70
   2   3   6  246.88   11.60
   2  -3   6  251.67   12.80
  -2  -3  -6  222.78   18.00
  -2  -3  -6  234.58   17.20
   2  -3   6  249.97   12.90
   2  -3   6  234.48   17.20
  -2   3  -7   52.49    8.00
  -2   3  -7   57.29    8.00
   2   3   7   56.69    5.90
   2  -3   7   57.59   11.40
  -2  -3  -7   42.70   10.30
   2  -3   7   49.10    7.40
   2  -3   7   51.79    7.90
   2   3   8  158.78    8.30
  -2   3  -8  164.88   13.20
  -2   3  -8  163.98   12.30
   2   3   8  158.28   17.20
   2  -3   8  160.58   12.20
   2  -3   8  146.29   11.90
  -2  -3  -8  191.58   17.80
   2  -3   8  144.09   16.60
  -2   3  -9   10.50    5.60
  -2   3  -9    5.30    7.20
  -2   3  -9   11.70    6.40
   2   3   9   11.70   11.80
   2  -3   9  -10.00    9.20
  -2  -3  -9    3.90    9.40
   2  -3   9    1.90    6.20
  -2   3 -10   25.70    5.80
  -2   3 -10   36.40    8.90
  -2   3 -10   18.50    6.10
   2   3  10   32.30   13.90
   2  -3  10   22.60    7.60
   2  -3  10   13.10   11.30
  -2  -3 -10   10.10   11.00
   2   3  11   35.30   14.50
  -2   3 -11   45.30    9.60
   2  -3  11   58.99   15.20
  -2  -3 -11   23.40   12.40
   2   3  12   10.50   13.70
  -2   3 -12   -1.10    7.80
  -2  -3 -12    3.20   11.90
   2  -3  12   -0.30   12.20
  -2   3 -13   19.00    9.00
   2   3  13    7.20   14.30
  -2  -3 -13   10.30   12.80
   2  -3  13   10.50   15.10
  -2   4  14   24.20   14.40
  -2  -4  14    2.70   14.50
   2  -4 -14    3.10   12.40
   2   4 -13    0.00    8.00
  -2   4  13   -9.60   11.50
  -2  -4  13    2.20   13.20
   2  -4 -13    2.90   11.80
  -2   4  12   -9.70   11.10
   2   4 -12  -11.40    7.50
   2  -4 -12   -0.50   10.40
  -2  -4  12   -2.60   11.40
  -2   4  11    6.10    6.70
   2   4 -11   12.30    8.70
  -2   4  11  -17.10   10.10
   2  -4 -11   24.00   11.50
  -2  -4  11   10.20   11.80
   2   4 -10   11.40    8.70
  -2   4  10    2.80   11.40
  -2   4  10  -10.10    5.80
   2  -4 -10    6.30   10.50
  -2  -4  10   -5.00   10.90
  -2   4   9   75.59   10.20
   2   4  -9   72.29   12.90
   2   4  -9   68.39   11.00
   2  -4  -9   61.09   10.40
   2  -4  -9   77.09   13.00
  -2  -4   9   81.89   14.40
   2   4  -8   87.09   12.80
  -2   4   8   92.49   10.90
   2   4  -8   79.69   11.20
   2  -4  -8   82.29   10.90
  -2  -4   8   99.09   13.90
   2  -4  -8   61.59   11.30
  -2   4   7  431.76   21.10
  -2   4   7  424.36   23.90
  -2   4   7  405.66   19.60
   2   4  -7  407.46   21.60
   2   4  -7  436.46   21.70
   2  -4  -7  473.85   24.40
   2  -4  -7  388.06   21.90
   2  -4  -7  406.06   20.40
   2   4  -6    2.30    7.00
  -2   4   6    7.10    6.60
  -2   4   6   -6.10    6.00
  -2   4   6    0.20    8.40
   2   4  -6   -4.90    7.00
   2  -4  -6    3.70    7.90
   2  -4  -6   -5.30    7.00
   2  -4  -6    9.10    9.10
  -2   4   5 1520.25   44.80
  -2   4   5 1412.96   45.90
   2   4  -5 1440.76   37.40
  -2   4   5 1536.85   46.20
   2   4  -5 1474.75   45.40
   2   4  -5 1519.75   44.70
   2  -4  -5 1487.35   46.30
   2  -4  -5 1487.15   46.80
   2  -4  -5 1452.45   45.00
   2   4  -4  936.31   31.40
  -2   4   4  984.40   32.40
   2   4  -4  947.81   25.80
  -2   4   4  929.51   33.00
  -2   4   4  938.61   31.40
   2   4  -4  941.31   31.10
   2  -4  -4  951.70   32.80
   2  -4  -4  908.91   31.60
   2  -4  -4  931.11   31.70
  -2  -4   4  911.81   25.10
   2   4  -3 1056.09   29.20
  -2   4   3 1044.90   33.70
  -2   4   3 1040.10   34.70
  -2   4   3 1030.70   33.50
   2   4  -3 1017.40   33.20
   2  -4  -3 1018.80   33.60
  -2  -4   3 1042.30   28.80
   2  -4  -3 1051.29   34.50
  -2  -4   3 1060.09   33.10
  -2   4   2  119.09   10.80
  -2   4   2  125.09   11.80
   2   4  -2   89.69    7.50
  -2   4   2   82.19    9.30
   2   4  -2   70.89    8.80
  -2  -4   2   79.19    6.90
  -2  -4   2   87.69    8.90
   2  -4  -2  113.79   11.00
   2  -4  -2  107.69   10.20
  -2   4   1    8.20    6.10
  -2   4   1   16.30    7.30
   2   4  -1    4.30    6.60
  -2   4   1   -2.70    3.50
   2   4  -1    3.60    4.90
  -2  -4   1    2.50    4.90
   2  -4  -1   15.30    6.50
  -2  -4   1    0.10    5.10
   2  -4  -1    5.90    6.20
  -2   4   0   15.90    7.00
   2   4   0   15.60    5.80
   2   4   0   14.50    7.10
  -2   4   0   17.80    7.00
  -2   4   0   10.10    6.10
  -2  -4   0   17.90    6.20
   2  -4   0   15.30    6.10
   2  -4   0   10.60    5.90
  -2  -4   0   26.30    6.40
   2   4   1 2355.86   62.79
  -2   4  -1 2317.87   63.49
  -2   4  -1 2319.57   61.99
  -2   4  -1 2227.28   63.59
   2   4   1 2202.48   63.69
  -2   4  -1 2307.17   61.69
  -2  -4  -1 2230.58   62.49
  -2  -4  -1 2340.67   63.99
   2  -4   1 2303.27   63.59
   2  -4   1 2291.87   61.79
  -2   4  -2  211.18   14.90
  -2   4  -2  240.48   12.90
  -2   4  -2  210.18   14.40
   2   4   2  238.88   14.50
  -2   4  -2  207.38   13.80
   2   4   2  251.97   16.10
  -2  -4  -2  260.37   15.50
   2  -4   2  201.98   14.10
   2  -4   2  205.58   12.50
  -2  -4  -2  238.58   15.80
   2  -4   2  247.08   12.20
  -2   4  -3 1400.86   40.80
  -2   4  -3 1348.57   40.70
  -2   4  -3 1301.07   38.40
  -2   4  -3 1306.67   41.90
   2   4   3 1293.47   41.80
   2   4   3 1352.06   41.40
   2  -4   3 1316.17   38.20
  -2  -4  -3 1349.07   42.40
  -2  -4  -3 1280.07   41.50
   2  -4   3 1306.47   38.00
   2   4   4  207.88   14.90
  -2   4  -4  157.98   11.50
   2   4   4  184.48   15.30
  -2   4  -4  151.98   12.30
  -2   4  -4  157.68   14.20
  -2   4  -4  195.78   15.20
   2  -4   4  179.58   11.00
   2  -4   4  161.98   11.00
  -2  -4  -4  186.38   14.30
  -2  -4  -4  181.68   15.40
   2  -4   4  135.99   12.90
   2   4   5  351.26   21.60
  -2   4  -5  410.36   20.40
  -2   4  -5  393.16   21.30
   2   4   5  379.96   19.50
  -2  -4  -5  384.06   21.00
   2  -4   5  361.46   15.80
   2  -4   5  354.66   15.40
  -2  -4  -5  405.46   22.00
   2  -4   5  376.26   20.60
  -2   4  -6   16.60    9.10
   2   4   6    3.00    3.40
   2  -4   6   24.60    9.70
   2  -4   6   21.00    6.20
  -2  -4  -6   17.50   10.00
   2  -4   6   26.80    6.30
  -2   4  -7  539.25   22.60
  -2   4  -7  550.34   20.80
   2   4   7  497.45   19.10
  -2   4  -7  536.95   27.80
   2  -4   7  544.75   27.00
  -2  -4  -7  478.15   26.10
   2  -4   7  545.05   20.30
   2  -4   7  506.25   19.70
  -2   4  -8  320.07   16.70
   2   4   8  311.37   14.40
  -2   4  -8  334.07   18.10
  -2  -4  -8  340.27   23.10
   2  -4   8  328.27   15.40
   2  -4   8  315.67   16.00
   2  -4   8  338.97   24.00
   2   4   9  371.36   14.70
  -2   4  -9  390.46   18.80
  -2   4  -9  396.26   19.10
  -2  -4  -9  333.17   24.40
   2  -4   9  369.16   17.40
   2  -4   9  423.16   26.30
  -2   4 -10   -2.60    5.80
  -2   4 -10   -8.70    6.50
   2   4  10   18.40   11.90
   2  -4  10  -14.70   10.30
  -2  -4 -10   12.10   11.10
   2   4  11   60.59   16.10
  -2   4 -11   48.50    9.40
   2  -4  11   47.50   15.40
  -2  -4 -11   36.70   13.70
   2   4  12   30.70   14.50
  -2   4 -12   13.10    8.10
  -2  -4 -12   37.00   14.40
   2  -4  12   28.80   14.90
   2   5 -13   41.60   11.20
  -2   5  13   55.39   16.30
   2   5 -13   21.30   13.40
   2  -5 -13   52.09   15.20
  -2  -5  13   45.30   16.00
  -2   5  12   -2.80   12.80
   2   5 -12   -4.90   10.60
   2   5 -12   18.00   10.00
   2  -5 -12   -4.00   11.30
  -2  -5  12   13.40   13.70
   2   5 -11    7.10    8.90
  -2   5  11  -10.60   11.70
   2   5 -11    1.30   10.60
  -2  -5  11   25.10   12.80
   2  -5 -11  -13.20   10.30
  -2   5  10   66.69   10.40
   2   5 -10   81.39   15.00
   2   5 -10   73.09   12.30
   2  -5 -10   66.19   13.60
  -2   5   9  129.79   13.30
   2   5  -9  145.89   15.00
   2   5  -9  141.79   15.90
   2  -5  -9  124.19   16.10
  -2   5   8   18.70    8.60
  -2   5   8    1.40   11.60
   2   5  -8   10.10    9.60
   2  -5  -8   12.60   10.70
  -2   5   7  479.55   26.50
  -2   5   7  423.76   21.70
   2   5  -7  434.06   23.90
   2  -5  -7  434.86   24.70
   2   5  -6    3.70    8.70
   2   5  -6   25.00    3.60
  -2   5   6   27.20    8.60
   2   5  -6   13.90    8.30
  -2   5   6   23.70    9.40
  -2   5   6   35.10   11.70
   2  -5  -6    6.10    8.20
   2  -5  -6   26.60   10.50
  -2   5   5   63.49   12.50
  -2   5   5   62.69   11.20
   2   5  -5   56.99    5.60
   2   5  -5   70.39   10.60
   2   5  -5   52.49    9.80
  -2   5   5   52.39    9.80
   2  -5  -5   63.49   11.70
   2  -5  -5   60.89   11.40
  -2  -5   5   65.89    4.70
  -2  -5   5   62.49    4.80
   2   5  -4    9.30    7.80
  -2   5   4   -3.50    6.60
  -2   5   4   -0.70    7.70
  -2   5   4    8.10    9.00
   2   5  -4   11.60    7.40
   2   5  -4   -1.00    4.10
   2  -5  -4   -0.30    8.20
   2  -5  -4   -5.30    7.60
  -2  -5   4    2.30    3.90
  -2  -5   4   -0.40    6.60
  -2   5   3  855.51   32.70
  -2   5   3  870.11   31.70
   2   5  -3  895.01   27.00
   2   5  -3  906.81   31.90
  -2   5   3  896.31   31.60
  -2  -5   3  800.82   26.00
   2  -5  -3  903.91   32.30
   2  -5  -3  900.71   31.90
  -2  -5   3  915.21   31.30
  -2   5   2  107.79   11.30
   2   5  -2   70.39    7.90
  -2   5   2   72.89   10.50
  -2   5   2   82.39   11.10
   2   5  -2   88.89   10.80
   2  -5  -2   83.09   10.70
   2  -5  -2   49.60    8.70
  -2  -5   2   74.89    9.50
  -2  -5   2   84.89    8.00
  -2   5   1 1458.35   46.80
  -2   5   1 1575.44   46.20
   2   5  -1 1491.75   46.30
  -2   5   1 1486.25   46.20
   2   5  -1 1562.24   43.90
  -2  -5   1 1451.45   43.40
   2  -5  -1 1502.05   45.50
   2  -5  -1 1571.64   46.70
  -2  -5   1 1545.55   46.30
   2   5   0   40.80    9.90
  -2   5   0   49.20    9.60
  -2   5   0   47.20    9.40
  -2   5   0   52.29    8.70
   2   5   0   35.20    7.30
  -2  -5   0   44.10    8.70
   2  -5   0   40.20    8.30
   2  -5   0   32.70    7.50
  -2  -5   0   34.40    7.60
   2   5   1   56.99    8.90
  -2   5  -1   38.30    9.50
  -2   5  -1   44.30    9.50
   2   5   1   50.59   10.20
  -2   5  -1   33.60    7.60
   2  -5   1   42.50    8.30
  -2  -5  -1   30.30    7.90
   2  -5   1   42.50    7.90
  -2  -5  -1   47.40    9.10
   2   5   2   39.90    9.60
  -2   5  -2   63.09   10.30
  -2   5  -2   78.89   10.00
  -2   5  -2   78.99    9.30
   2   5   2   73.19   10.30
  -2   5  -2   81.79   10.60
   2  -5   2   74.69   10.10
   2  -5   2   75.79    8.70
   2  -5   2   72.99    8.20
  -2  -5  -2   83.29   11.00
  -2  -5  -2   62.79   10.70
  -2   5  -3   92.39    9.40
   2   5   3   91.69   11.50
   2   5   3   83.19   12.20
  -2   5  -3   95.79   11.60
  -2   5  -3   81.09   11.70
  -2   5  -3   94.89   11.50
  -2  -5  -3   80.39   11.90
   2  -5   3   85.49    8.70
   2  -5   3   87.49    9.00
  -2  -5  -3   84.29   12.10
   2   5   4   31.30    9.50
   2   5   4   24.00   10.30
  -2   5  -4   28.70    9.20
  -2   5  -4   54.29   10.00
  -2   5  -4   27.40    7.10
  -2   5  -4   14.90    8.60
   2  -5   4   25.00    6.40
   2  -5   4   30.20    6.60
  -2  -5  -4   19.90    8.80
  -2  -5  -4   30.40   10.80
  -2   5  -5  893.51   32.80
   2   5   5  878.31   36.50
  -2   5  -5  871.21   35.10
   2   5   5  863.41   30.50
   2   5   5  926.21   34.80
   2  -5   5  916.21   29.30
   2  -5   5  943.41   29.00
  -2  -5  -5  892.51   35.00
  -2   5  -6  349.87   19.70
   2   5   6  333.27   17.50
   2   5   6  308.77   23.80
  -2   5  -6  344.27   22.90
  -2  -5  -6  289.57   21.90
   2  -5   6  303.27   15.40
   2  -5   6  293.17   14.90
  -2   5  -7  632.04   32.40
  -2   5  -7  639.84   27.60
   2   5   7  691.73   25.40
   2  -5   7  671.13   23.50
   2  -5   7  648.54   31.40
  -2  -5  -7  697.03   32.20
   2  -5   7  626.84   22.90
  -2   5  -8    0.60    7.90
  -2   5  -8   14.80   11.40
   2   5   8    7.10    6.30
   2  -5   8    9.50   11.60
  -2  -5  -8    2.70   10.30
   2  -5   8   -1.90    5.80
  -2   5  -9   83.49   15.50
  -2   5  -9   83.59   11.40
   2  -5   9   56.29   14.10
  -2  -5  -9   87.49   16.10
  -2   5 -10   -0.20   12.00
   2  -5  10    6.20   12.80
  -2  -5 -10    4.70   11.50
  -2   5 -11   65.39   16.40
   2   5  11   62.99   17.50
   2  -5  11   53.29   16.50
  -2  -5 -11   53.99   15.50
   2   5  12   31.30   16.30
  -2   5 -12   51.89   16.80
   2  -5  12   12.80   15.40
  -2  -5 -12    8.90   13.50
   2   6 -13   11.70   13.60
   2   6 -13   -4.50   10.80
  -2   6  13    3.00   14.80
   2  -6 -13   30.00   14.90
  -2   6  12   27.20   15.90
   2   6 -12   59.89   13.00
   2   6 -12   41.70   15.10
   2  -6 -12   40.80   15.20
   2   6 -11   21.00   10.30
   2   6 -11   36.70   13.50
   2  -6 -11    2.60   12.20
   2   6 -10   12.60    9.60
   2   6 -10    0.40   11.40
   2  -6 -10    5.90   12.20
  -2   6   9  101.19   17.30
   2   6  -9  143.99   18.10
   2  -6  -9  124.89   16.60
  -2   6   8   13.10   12.90
   2   6  -8    8.00   10.60
  -2   6   8   -0.40    8.50
   2  -6  -8   15.20   11.90
  -2   6   7   67.09   14.80
   2   6  -7   75.59   13.40
  -2   6   7   96.89   13.00
   2  -6  -7   76.59   13.20
   2   6  -6  229.28   10.50
   2   6  -6  230.18   18.60
  -2   6   6  192.78   18.80
  -2   6   6  260.17   18.50
   2  -6  -6  199.38   19.10
  -2  -6   6  214.08    8.30
  -2  -6   6  215.38    8.20
  -2   6   5  312.17   20.20
  -2   6   5  327.87   20.30
   2   6  -5  337.27   14.00
   2   6  -5  333.57   21.90
  -2   6   5  328.07   23.70
   2  -6  -5  345.77   22.10
  -2  -6   5  339.97   13.00
  -2   6   4   56.99   13.60
   2   6  -4   45.30   10.70
  -2   6   4   55.79   10.60
  -2   6   4   48.60   10.80
   2   6  -4   49.40    7.20
   2  -6  -4   38.80   10.60
  -2  -6   4   61.59    6.90
  -2  -6   4   47.70    9.70
   2  -6  -4   57.39   11.90
  -2   6   3    9.80    8.50
  -2   6   3    4.10    7.70
   2   6  -3   18.20    9.90
  -2   6   3    7.90   10.00
   2   6  -3    5.10    5.60
   2  -6  -3   10.30    8.00
   2  -6  -3   -3.80    8.50
  -2  -6   3   -1.30    7.40
  -2  -6   3    9.80    5.60
   2   6  -2  105.29   10.30
  -2   6   2  120.39   13.40
  -2   6   2  116.19   14.10
   2   6  -2  120.19   13.50
  -2   6   2  148.99   14.10
  -2  -6   2  127.79   10.80
   2  -6  -2  135.99   13.90
   2  -6  -2  135.79   13.60
  -2  -6   2   95.49   11.60
  -2   6   1   75.09   11.10
   2   6  -1   81.29    9.80
  -2   6   1   50.59    9.50
   2   6  -1   66.59   12.00
  -2   6   1   72.49   12.30
  -2  -6   1   86.19    9.90
   2  -6  -1   84.19   12.00
   2  -6  -1   63.79   10.20
  -2  -6   1   75.39   10.80
   2   6   0   73.99   12.70
   2   6   0   52.29    9.00
  -2   6   0   65.79   12.00
  -2   6   0   65.69   10.90
  -2   6   0   65.39    9.90
  -2  -6   0   61.69    9.80
   2  -6   0   51.29    9.00
   2  -6   0   45.60    9.40
  -2  -6   0   59.79   10.80
   2   6   1  609.14   28.70
  -2   6  -1  673.73   28.30
  -2   6  -1  654.53   28.90
  -2   6  -1  651.23   25.50
   2   6   1  653.33   26.20
   2  -6   1  683.83   27.70
   2  -6   1  630.74   25.00
  -2  -6  -1  699.63   28.60
  -2  -6  -1  635.34   26.20
  -2   6  -2  480.85   21.60
  -2   6  -2  497.05   25.70
  -2   6  -2  490.65   23.10
   2   6   2  456.85   26.70
  -2   6  -2  587.64   26.00
   2   6   2  497.55   23.10
   2  -6   2  475.85   21.00
  -2  -6  -2  481.75   25.20
  -2  -6  -2  466.95   23.00
   2   6   3  243.68   17.40
  -2   6  -3  184.38   16.80
   2   6   3  187.68   17.80
  -2   6  -3  196.28   16.70
  -2   6  -3  182.08   14.10
   2  -6   3  186.28   14.00
  -2  -6  -3  234.88   18.50
   2  -6   3  229.78   14.00
  -2   6  -4  176.38   17.40
   2   6   4  194.18   16.90
  -2   6  -4  225.48   14.90
  -2   6  -4  243.98   18.50
   2   6   4  204.78   16.40
   2   6   4  197.38   18.40
   2  -6   4  191.08   13.90
   2  -6   4  181.08   12.90
  -2  -6  -4  145.29   15.70
  -2   6  -5  -14.90    9.50
  -2   6  -5   -4.80    6.50
  -2   6  -5   -3.80    8.90
   2   6   5    2.80    7.80
   2   6   5   -7.90   11.10
  -2  -6  -5  -10.80   10.00
   2  -6   5    5.90    6.40
   2  -6   5    8.10    6.20
   2   6   6   14.30   13.20
  -2   6  -6   27.60   12.80
   2   6   6   29.30    8.90
  -2   6  -6   18.70   10.50
   2  -6   6   17.80    6.90
  -2  -6  -6   21.50   11.70
   2   6   7   24.90   13.10
   2   6   7   -5.10    7.60
  -2   6  -7  -10.50   11.00
  -2  -6  -7    1.90   11.00
   2  -6   7    3.50    6.10
   2   6   8   46.40    9.90
  -2   6  -8   48.80   14.10
  -2  -6  -8   41.30   13.90
  -2   6  -9   41.10   15.10
  -2  -6  -9   73.79   16.50
  -2   6 -10   62.89   16.70
  -2  -6 -10   40.80   14.30
  -2   6 -11    3.90   14.00
   2  -6  11   13.60   14.70
  -2  -6 -11    6.50   13.70
   2   7 -12   15.60   14.30
   2   7 -12    2.40   10.60
   2  -7 -12   11.20   13.90
   2   7 -11   -3.20   12.80
   2   7 -11   -1.40   10.10
   2  -7 -11    0.90   12.50
   2   7 -10    5.60   12.80
   2  -7 -10   22.90   13.40
  -2   7   9   -3.90   13.70
   2   7  -9   20.00   12.20
   2  -7  -9   11.70   12.30
  -2   7   8   61.09   16.50
   2   7  -8   54.59   13.40
   2  -7  -8   38.10   13.70
  -2   7   7  104.09   17.30
   2   7  -7  108.19    8.60
   2   7  -7  134.29   17.00
   2  -7  -7  109.59   16.60
  -2   7   6    0.10   12.80
   2   7  -6    4.40    5.40
   2   7  -6    0.10   10.60
   2  -7  -6   11.10   12.20
  -2  -7   6    3.30    4.20
  -2  -7   6   11.70    4.50
  -2   7   5   -1.00   12.70
   2   7  -5   16.20    6.40
   2   7  -5   18.70   11.40
   2  -7  -5   27.80   11.70
  -2  -7   5    6.30    5.40
  -2   7   4  105.79   15.00
   2   7  -4  146.49   16.70
   2   7  -4  110.69   10.60
  -2   7   4   84.49   15.70
   2  -7  -4   74.49   13.00
  -2  -7   4  101.99    9.60
   2   7  -3   32.20   11.80
  -2   7   3   50.59   13.70
   2   7  -3   48.10    8.90
  -2   7   3   50.09   11.90
   2  -7  -3   28.90   11.30
  -2  -7   3   36.70    7.80
  -2   7   2   66.09   11.80
  -2   7   2   49.10   13.40
   2   7  -2   67.79   10.10
   2   7  -2   64.59   13.20
  -2  -7   2   51.49    9.10
   2  -7  -2   49.99   11.60
   2   7  -1   21.50   12.10
   2   7  -1    9.10    7.80
  -2   7   1    5.50    9.10
  -2   7   1   20.30   11.70
  -2  -7   1   18.20    8.10
   2  -7  -1   15.40    9.10
  -2   7   0  373.86   24.60
  -2   7   0  352.96   20.60
   2   7   0  318.87   19.70
   2   7   0  339.17   24.70
   2  -7   0  350.86   20.70
  -2  -7   0  294.47   19.50
  -2   7  -1   19.80   11.40
   2   7   1    5.10   11.60
  -2   7  -1   14.30    8.00
   2   7   1   12.80    8.80
  -2  -7  -1    4.50    8.90
   2  -7   1   14.60    8.30
  -2   7  -2   14.30    8.20
  -2   7  -2   11.80   11.60
   2   7   2  -11.60    8.00
   2   7   2    0.20   11.70
   2  -7   2   -2.20    7.20
  -2  -7  -2   -3.10    9.00
  -2   7  -3   10.00    7.80
  -2   7  -3    2.30   11.50
   2   7   3   -7.50    8.90
   2   7   3   20.90   12.70
   2  -7   3   10.10    7.90
  -2  -7  -3   19.70   10.70
   2   7   4  137.89   17.60
  -2   7  -4  180.08   14.40
  -2   7  -4  139.19   18.10
   2  -7   4  152.58   13.10
  -2  -7  -4  162.68   17.90
  -2   7  -5   25.30   12.20
   2   7   5   34.50   13.90
  -2   7  -5   10.20    7.80
  -2  -7  -5   33.10   13.10
   2  -7   5   10.40    7.20
   2   7   6   72.39   16.00
  -2   7  -6   83.89   16.40
  -2  -7  -6   78.19   15.00
   2  -7   6   88.19   10.20
  -2   7  -7   31.50   13.40
   2   7   7   33.50   15.30
  -2  -7  -7   31.20   13.40
  -2   7  -8    1.40   12.50
  -2  -7  -8   -4.70   12.10
  -2   7  -9   82.89   17.70
  -2  -7  -9   47.10   15.40
  -2   7 -10   35.70   15.70
  -2  -7 -10    8.60   13.80
   2   8 -11  -13.10   10.20
   2   8 -11   10.70   14.10
   2  -8 -11   -5.80   13.30
   2   8 -10   50.59   16.00
  -2   8  10   43.30   17.40
   2  -8 -10   35.40   16.20
  -2   8   9   38.70   16.70
   2   8  -9   20.20   13.40
   2  -8  -9    7.20   12.80
  -2   8   8    7.70   14.50
   2   8  -8   -2.90   11.70
   2  -8  -8   20.30   13.70
   2   8  -7   37.70   13.60
  -2   8   7   -3.30   14.10
   2  -8  -7   27.40   13.30
  -2   8   6   61.69   17.00
   2   8  -6   84.79    8.90
   2   8  -6   77.79   15.60
   2  -8  -6   50.19   13.50
  -2  -8   6   97.79    8.20
   2   8  -5   20.00   12.20
  -2   8   5   13.90   13.50
   2   8  -5    1.60    6.30
   2  -8  -5   -1.40    9.90
  -2  -8   5    2.40    6.00
   2   8  -4  216.58   15.50
   2   8  -4  215.98   20.60
  -2   8   4  195.88   21.60
   2  -8  -4  178.78   18.30
  -2  -8   4  180.38   13.80
   2   8  -3    3.00    7.70
   2   8  -3    5.20   12.00
  -2   8   3   14.50   13.90
  -2  -8   3   11.00    7.60
   2  -8  -3   22.40   11.50
  -2   8   2   -9.20   12.80
   2   8  -2   -2.10   12.40
   2   8  -2   -1.50    8.00
  -2   8   2    5.50   10.10
   2  -8  -2  -21.70    9.40
  -2  -8   2    4.20    7.80
  -2   8   1  134.79   15.60
  -2   8   1  160.78   19.80
   2   8  -1  134.19   18.70
   2   8  -1  164.58   15.70
   2  -8  -1  126.59   15.30
  -2  -8   1  145.09   14.30
   2   8   0   10.30    9.10
   2   8   0   20.60   13.10
  -2   8   0   22.00   13.50
  -2   8   0   17.30   10.40
   2  -8   0   25.90   10.40
  -2  -8   0    8.30    9.10
  -2   8  -1   28.80   10.20
   2   8   1   26.30   14.90
   2   8   1   37.10   11.10
  -2   8  -1    2.40   12.20
   2  -8   1   17.50    9.90
  -2  -8  -1   27.60   10.80
  -2   8  -2  152.98   18.40
   2   8   2  153.58   19.30
  -2   8  -2  143.79   15.00
   2   8   2  134.39   16.10
   2  -8   2  151.08   15.00
  -2  -8  -2  113.99   14.90
   2   8   3   -0.80   13.10
  -2   8  -3   -8.10    7.80
  -2   8  -3    6.80   12.00
   2  -8   3   -1.00    7.50
  -2  -8  -3    8.90   10.60
  -2   8  -4   28.50    9.20
   2   8   4   19.20   14.00
  -2   8  -4   15.90   12.80
  -2  -8  -4    9.00   11.60
   2  -8   4   11.70    7.80
   2   8   5   18.30   14.30
  -2   8  -5   10.00   13.40
  -2  -8  -5    5.90   12.20
   2  -8   5   12.20    7.60
   2   8   6   16.70   14.50
  -2   8  -6   41.40   15.00
  -2  -8  -6   22.60   13.00
   2   8   7    3.80   15.10
  -2   8  -7  -11.30   12.40
  -2  -8  -7    4.60   13.20
   2   8   8   85.99   18.40
  -2   8  -8   61.49   17.40
  -2  -8  -8  123.89   20.00
  -2   8  -9    1.60   14.40
  -2  -8  -9    7.30   14.50
  -2   9   9    0.10   15.60
   2   9  -9   -1.70   14.00
   2  -9  -9   -6.70   14.00
   2   9  -8   17.00   14.60
  -2   9   8   12.60   16.40
   2  -9  -8   56.59   16.60
   2   9  -7   28.00   14.30
  -2   9   7    3.80   14.70
   2  -9  -7    9.50   14.20
  -2   9   6   15.90   16.60
   2   9  -6   14.20   14.60
   2  -9  -6   20.40   12.90
  -2   9   5    5.60   15.40
   2   9  -5   -5.00   12.20
   2  -9  -5    2.50   11.80
  -2   9   4   17.90   16.20
   2   9  -4   36.10   14.20
   2  -9  -4   28.50   12.80
  -2   9   3   11.30   14.50
   2   9  -3   -6.20   12.50
  -2  -9   3   14.60    8.30
   2  -9  -3    3.00   10.70
  -2   9   2   40.10   15.80
   2   9  -2   57.29   16.30
   2   9  -2   63.39   11.70
   2  -9  -2   52.69   13.40
  -2  -9   2   61.09   11.20
  -2   9   1   63.39   13.50
  -2   9   1   38.30   15.90
   2   9  -1   67.89   12.00
   2   9  -1   33.10   15.00
   2  -9  -1   40.10   12.60
  -2  -9   1   42.30   10.80
  -2   9   0   77.19   13.50
   2   9   0   65.39   16.50
   2   9   0   99.99   14.30
  -2   9   0   84.09   17.50
   2  -9   0  104.99   14.80
  -2  -9   0  105.49   14.30
   2   9   1   28.20   14.90
   2   9   1   14.70   10.40
  -2   9  -1   16.00   14.50
  -2   9  -1   17.30   10.50
  -2  -9  -1   11.10   10.30
   2  -9   1   19.70   10.60
   2   9   2    8.90   14.80
  -2   9  -2    6.00   13.80
   2  -9   2    7.10    9.30
  -2  -9  -2   12.50   11.10
  -2   9  -3   -3.90   13.10
   2   9   3   14.00   14.60
  -2  -9  -3  -23.80   10.30
   2  -9   3    9.90    8.80
  -2   9  -4  132.89   19.40
   2   9   4  114.69   19.90
  -2  -9  -4  131.59   18.50
  -2   9  -5   12.80   14.50
   2   9   5    6.80   14.90
  -2  -9  -5    5.90   12.20
  -2   9  -6   35.60   16.00
   2   9   6   45.40   17.10
  -2  -9  -6   18.80   13.90
   2   9   7  -19.50   14.20
  -2   9  -7  -19.00   12.90
  -2  -9  -7   15.70   14.90
   2   9   8   32.40   17.30
  -2   9  -8   -2.90   14.90
  -2  -9  -8    1.10   14.70
   2  10  -7   -7.10   14.60
  -2  10   7   38.20   18.80
   2 -10  -7   25.80   15.30
   2  10  -6  -12.00   14.00
  -2  10   6   -5.60   16.80
   2 -10  -6   10.00   13.70
   2  10  -5   12.60   15.00
  -2  10   5   14.60   16.70
   2 -10  -5   14.20   13.60
  -2  10   4   74.49   20.10
   2  10  -4   54.99   18.50
   2 -10  -4   87.29   16.90
  -2  10   3   18.60   17.50
   2  10  -3  -24.20   14.60
   2 -10  -3   -7.20   11.60
   2  10  -2    1.10   15.60
  -2  10   2   -5.80   16.00
   2 -10  -2   16.00   12.00
   2  10  -1  -17.50   14.30
  -2  10   1   -4.70   15.00
   2 -10  -1    1.80   11.00
  -2 -10   1    5.80   10.10
   2  10   0   -0.80   15.00
  -2  10   0   -9.80   15.10
   2 -10   0   11.10   11.10
  -2 -10   0   -2.00   10.00
   2  10   1   55.29   18.80
  -2  10  -1   71.59   19.10
   2 -10   1   62.59   13.40
  -2 -10  -1   80.39   15.40
   2  10   2  -11.00   15.10
  -2  10  -2    3.90   15.30
  -2 -10  -2    6.80   12.00
   2  10   3   84.09   19.40
  -2  10  -3   59.59   17.50
  -2 -10  -3   80.19   16.90
  -2  10  -4    7.60   14.40
   2  10   4  -27.40   14.70
  -2 -10  -4   -4.20   12.60
   2  10   5    4.70   15.80
  -2  10  -5  -26.00   13.60
  -2 -10  -5   -7.40   12.30
  -2  10  -6   -5.00   15.00
   2  10   6   19.50   17.40
  -2 -10  -6   15.10   15.10
  -2  11   5   -1.80   18.30
   2  11  -5  -18.30   16.50
  -2  11   4   13.90   18.90
   2  11  -4  -33.50   16.00
   2 -11  -4    9.60   13.70
   2  11  -3   17.50   18.40
  -2  11   3    2.30   19.00
   2 -11  -3   24.70   13.90
  -2  11   2  -12.60   16.60
   2  11  -2  -19.50   16.30
   2 -11  -2  -11.20   11.40
  -2  11   1   47.40   20.10
   2  11  -1   14.80   17.10
   2  11   0    7.60   17.30
  -2  11   0  -14.60   17.00
  -2  11  -1  -17.30   16.60
   2  11   1   14.10   18.20
   2  11   2    3.00   16.40
  -2  11  -2  -12.90   16.50
  -2  11  -3  -14.10   16.50
   2  11   3   16.60   17.80
  -2 -11  -3    4.50   12.90
   3   0 -15    6.50    8.60
  -3   0  15    1.80   13.30
   3   0 -14   31.80    9.50
  -3   0  14   23.10   13.20
   3   0 -13   -0.50    6.80
  -3   0  13   -4.90   11.40
   3   0 -13   -9.20    7.10
   3   0 -12   82.29   10.80
   3   0 -12   83.29   10.60
  -3   0  12  102.49   15.50
  -3   0  11    1.80   10.00
   3   0 -11   -2.90    6.80
   3   0 -11  -10.20    6.40
  -3   0  10   22.30    6.90
   3   0 -10   17.40    7.50
   3   0 -10   10.50    6.80
  -3   0  10   30.70   10.60
  -3   0  10   24.70    6.50
   3   0  -9    2.10    6.00
   3   0  -9   -1.10    6.10
  -3   0   9    2.50    5.20
  -3   0   9    0.60    5.30
  -3   0   9   -4.60    7.90
   3   0  -8 1040.20   32.70
   3   0  -8 1006.50   31.20
  -3   0   8 1040.40   31.00
  -3   0   8 1035.00   34.00
  -3   0   8 1028.30   32.20
  -3   0   7   -3.70    6.00
  -3   0   7    7.30    4.50
   3   0  -7   11.60    5.90
  -3   0   7    1.00    3.40
   3   0  -7    9.70    6.20
   3   0  -7    1.40    4.80
   3   0  -6 1512.75   39.70
  -3   0   6 1216.88   40.30
   3   0  -6 1459.15   40.50
   3   0  -6 1481.25   41.30
  -3   0   6 1514.65   40.60
   3   0  -5    5.20    5.20
  -3   0   5    3.70    4.50
  -3   0   5   10.90    4.70
   3   0  -5   -0.30    4.40
  -3   0   5    2.90    3.50
   3   0  -5   -0.40    4.10
  -3   0   4   -2.10    3.90
   3   0  -4   -1.60    5.20
  -3   0   4   -1.00    4.50
   3   0  -4    0.30    4.20
   3   0  -4    5.50    3.80
  -3   0   4   -2.90    3.50
   3   0  -3   -4.70    3.00
   3   0  -3    0.60    4.00
  -3   0   3    1.90    3.00
  -3   0   3    0.70    4.20
  -3   0   3    2.70    5.10
   3   0  -3   -2.40    5.00
   3   0  -2 1775.92   43.00
  -3   0   2 1572.94   46.90
  -3   0   2 1836.62   46.60
   3   0  -2 1823.22   44.10
   3   0  -2 1805.82   46.60
   3   0  -2 1752.42   47.50
  -3   0   2 1868.21   46.60
   3   0  -2 1849.11   46.60
  -3   0   1    0.90    4.40
   3   0  -1    3.50    4.30
   3   0  -1    1.40    4.40
  -3   0   1   -3.60    4.20
   3   0  -1    0.20    4.60
  -3   0   1   -0.90    1.70
  -3   0   0 6455.55  158.98
   3   0   0 6411.26  154.98
   3   0   0 6416.66  158.98
   3   0   0 6531.05  159.58
  -3   0   0 6461.45  159.68
   3   0   1   -0.20    4.50
  -3   0  -1    3.90    3.60
   3   0   1    0.60    4.80
   3   0   1    3.30    3.70
  -3   0  -1    8.00    5.40
  -3   0  -2   13.20    3.40
  -3   0  -2    0.50    5.20
   3   0   2   11.20    3.40
   3   0   2    8.40    5.50
  -3   0  -3    3.40    2.50
   3   0   3    4.40    5.80
   3   0   3    7.30    2.80
   3   0   3   -2.50    2.50
  -3   0  -3   -0.40    5.00
   3   0   4 1366.56   39.20
  -3   0  -4 1344.87   39.40
   3   0   4 1259.17   39.30
   3   0   5    4.60    7.30
   3   0   5    0.60    5.30
  -3   0  -5    5.10    6.40
  -3   0  -6 1165.28   37.80
   3   0   6 1232.88   37.80
   3   0   6 1137.59   38.90
   3   0   7   -5.90    6.40
   3   0   7    0.30    8.60
  -3   0  -7    6.30    8.10
   3   0   8  762.32   31.90
  -3   0  -8  774.22   30.40
  -3   0  -9   16.10    9.30
   3   0   9   -2.80   11.10
   3   0  10    9.90   11.80
  -3   0 -10   11.40    9.30
  -3   0 -11   -4.80    9.10
   3   0  11  -12.40   11.70
  -3   0 -12  148.79   17.20
   3   0  12   98.79   18.50
   3   0  13  -28.50   11.90
  -3   0 -13  -11.70    9.90
  -3   1  15  -10.70   12.20
   3   1 -15    4.10    7.60
   3  -1 -15   -2.00    9.40
  -3  -1  15   21.20   14.80
  -3   1  14    8.50   12.40
   3   1 -14    1.50    7.20
  -3  -1  14   16.20   13.20
   3  -1 -14   -0.50    8.90
   3   1 -13   11.10    7.60
   3   1 -13   13.10    7.30
  -3   1  13   15.60   12.30
   3  -1 -13    4.00    7.00
   3  -1 -13   11.40    9.20
  -3  -1  13   22.20   12.20
   3   1 -12  101.19   10.40
   3   1 -12   95.19   11.10
  -3   1  12  121.89   10.70
  -3   1  12  130.59   16.40
   3  -1 -12   99.39   12.70
   3  -1 -12  132.69   12.00
  -3  -1  12  132.69   17.00
   3   1 -11   38.40    7.40
  -3   1  11   23.20   11.70
   3   1 -11   29.20    8.30
  -3   1  11   38.50    7.70
  -3  -1  11   48.10   12.70
   3  -1 -11   36.20    8.60
   3  -1 -11   30.00    9.50
  -3  -1  11   49.30    7.30
   3   1 -10   73.89    8.00
  -3   1  10   66.89    8.50
   3   1 -10   72.19    9.80
  -3   1  10   73.69   12.60
  -3  -1  10   88.29   13.30
   3  -1 -10   74.99   10.70
  -3  -1  10   77.99    7.70
   3  -1 -10   82.59   10.10
   3   1  -9   21.10    5.70
   3   1  -9   28.10    8.80
  -3   1   9   29.10    7.30
   3   1  -9   15.80    7.00
  -3   1   9   24.00    6.50
  -3   1   9   16.80    9.00
   3  -1  -9   19.80    8.80
   3  -1  -9   25.00    7.30
  -3  -1   9   25.10    5.30
   3  -1  -9   24.70    8.00
  -3  -1   9   18.30    9.20
   3   1  -8   32.30    8.10
  -3   1   8   22.80    7.80
   3   1  -8   17.90    6.80
   3   1  -8   34.80    5.50
  -3   1   8   35.50    7.20
  -3   1   8   25.50    6.20
   3  -1  -8   18.60    6.60
   3  -1  -8   25.30    7.40
  -3  -1   8   30.30    4.90
   3  -1  -8   35.20    8.40
  -3  -1   8   28.70    8.80
   3   1  -7   30.50    7.10
   3   1  -7   25.00    6.50
  -3   1   7   16.70    7.00
  -3   1   7   20.20    6.10
   3   1  -7   26.20    4.70
   3  -1  -7   27.10    7.40
  -3  -1   7   29.30    7.20
   3  -1  -7   22.40    6.40
   3  -1  -7   16.80    6.40
   3   1  -6  294.67   13.50
  -3   1   6  217.38   12.60
   3   1  -6  251.87   13.80
   3   1  -6  230.88    9.90
  -3   1   6  275.07   13.50
  -3  -1   6  243.18    9.30
   3  -1  -6  245.08   13.50
   3  -1  -6  266.17   14.50
  -3  -1   6  252.07   13.30
   3  -1  -6  240.38   12.90
   3   1  -5  131.99    7.10
  -3   1   5  139.89    9.60
   3   1  -5  140.69    9.80
   3   1  -5  135.79   10.70
  -3   1   5  135.39    9.70
   3  -1  -5  143.79   11.00
  -3  -1   5  140.79    9.70
   3  -1  -5  145.19   10.60
  -3  -1   5  136.59    9.70
  -3  -1   5  129.19    6.40
   3  -1  -5  136.49    9.90
   3   1  -4 5751.02  140.89
   3   1  -4 5672.53  144.49
  -3   1   4 5832.02  143.59
   3   1  -4 5901.51  140.29
   3   1  -4 5762.02  140.89
  -3   1   4 5704.83  144.29
  -3   1   4 5658.13  139.49
  -3  -1   4 5784.32  140.69
  -3  -1   4 5790.22  144.39
   3  -1  -4 5850.21  144.59
   3  -1  -4 5695.53  143.49
  -3  -1   4 5794.02  140.29
   3  -1  -4 5707.43  143.59
   3   1  -3  555.14   16.40
   3   1  -3  550.84   19.60
   3   1  -3  546.75   16.40
  -3   1   3  538.95   17.50
  -3   1   3  573.04   19.70
   3   1  -3  557.74   17.00
  -3   1   3  542.05   18.40
  -3  -1   3  586.64   19.30
   3  -1  -3  545.65   19.60
   3  -1  -3  560.64   17.80
   3  -1  -3  571.84   19.00
  -3   1   2 3303.77   83.69
   3   1  -2 3333.57   82.69
   3   1  -2 3429.86   83.79
  -3   1   2 3411.16   85.69
   3   1  -2 3304.17   85.69
   3  -1  -2 3344.37   85.69
   3  -1  -2 3326.37   85.19
  -3  -1   2 3428.46   83.69
   3  -1  -2 3310.87   83.59
   3   1  -1  343.97   13.80
  -3   1   1  344.67   10.20
  -3   1   1  351.86   14.10
   3   1  -1  331.37   12.90
  -3   1   1  320.37   13.10
  -3   1   1  339.57   11.70
   3   1  -1  343.77   10.80
   3  -1  -1  343.87   11.60
  -3  -1   1  324.97   13.70
  -3  -1   1  361.36   11.00
   3  -1  -1  345.17   14.20
  -3  -1   1  310.57   12.90
   3  -1  -1  326.27   13.80
   3   1   0   82.89    7.00
  -3   1   0  107.19    8.60
  -3   1   0   99.79    7.70
  -3   1   0  109.09    8.50
   3   1   0   77.89    7.20
  -3   1   0   97.79    6.90
  -3   1   0   99.29    6.80
  -3  -1   0   87.39    7.50
  -3  -1   0   83.79    7.60
   3  -1   0  107.49    6.90
  -3  -1   0   80.79    6.80
   3  -1   0  101.19    8.10
   3  -1   0  110.39    9.40
   3  -1   0  104.69    8.40
  -3   1  -1  155.88   10.40
   3   1   1  147.39   10.40
   3   1   1  139.69    8.40
  -3   1  -1  138.89    9.10
  -3   1  -1  140.59    9.10
  -3  -1  -1  134.79    9.60
   3  -1   1  135.09    9.10
  -3  -1  -1  151.08    9.90
   3  -1   1  140.89    8.70
   3  -1   1  134.79   10.10
  -3   1  -2 4267.97  109.79
  -3   1  -2 4372.46  107.79
   3   1   2 4400.66  110.29
   3   1   2 4313.57  106.99
  -3   1  -2 4279.57  107.49
  -3  -1  -2 4478.05  110.19
   3  -1   2 4341.17  107.89
   3  -1   2 4181.58  107.49
  -3  -1  -2 4350.56  110.39
   3   1   3  208.48   12.00
   3   1   3  227.08    8.10
  -3   1  -3  220.08   12.20
  -3   1  -3  221.28    9.40
  -3  -1  -3  212.18   13.20
   3  -1   3  203.28   12.70
   3  -1   3  217.08   11.40
  -3   1  -4   86.29    9.10
  -3   1  -4  106.29   10.50
   3   1   4  120.59   11.30
  -3   1  -4   87.79    6.40
   3  -1   4   84.19   10.10
  -3  -1  -4   94.49   10.20
   3  -1   4   92.49    8.90
  -3   1  -5   12.30    7.30
   3   1   5    8.80    7.10
  -3   1  -5   33.00    7.20
   3   1   5   14.60    6.20
  -3   1  -5   18.60    3.40
   3  -1   5   13.60    6.00
  -3  -1  -5   26.00    7.80
   3  -1   5   17.10    8.20
   3   1   6  118.99   11.50
  -3   1  -6  114.79   11.10
   3   1   6  131.39   13.40
  -3   1  -6  141.59   13.50
  -3  -1  -6  105.19   11.80
   3  -1   6  127.99   11.20
   3  -1   6  150.08   14.30
   3   1   7   56.79   11.80
  -3   1  -7   27.70    8.60
  -3  -1  -7   29.30    9.60
   3  -1   7   35.70    7.90
   3  -1   7   25.90   10.70
   3   1   8  380.76   24.20
  -3   1  -8  411.56   21.10
   3  -1   8  393.96   24.40
  -3  -1  -8  420.76   23.00
  -3   1  -9   49.60   10.90
   3   1   9   49.30   13.80
   3  -1   9   58.39   13.80
  -3  -1  -9   59.39   11.70
   3   1  10  172.38   19.80
  -3   1 -10  137.49   14.70
  -3  -1 -10  133.29   15.80
   3  -1  10  160.78   19.30
  -3   1 -11   63.79   12.50
   3   1  11   59.09   15.60
   3  -1  11   53.29   14.70
  -3  -1 -11   63.79   13.80
   3   1  12   -7.20   13.20
  -3   1 -12   22.70   11.20
  -3  -1 -12   11.10   11.10
   3  -1  12   26.20   14.10
  -3   1 -13    2.80    9.80
   3   1  13   15.40   15.10
   3  -1  13   24.80   14.60
  -3  -1 -13    0.00   10.80
   3   2 -15   14.30    6.90
  -3   2  15   13.60   14.10
   3  -2 -15   12.20   11.00
  -3  -2  15   35.70   15.90
   3   2 -14   60.39    8.40
  -3   2  14   61.49   15.80
  -3  -2  14   54.29   15.80
   3  -2 -14   70.29   13.30
   3   2 -13   39.60    6.90
  -3   2  13   43.60   14.00
   3   2 -13   24.20    8.50
   3  -2 -13   32.60    8.70
  -3  -2  13   13.20   12.70
   3  -2 -13   23.60   10.90
   3   2 -12  100.79    8.60
  -3   2  12   85.29    9.80
  -3   2  12   95.99   15.70
   3   2 -12   90.99   11.50
  -3  -2  12   97.69    7.20
   3  -2 -12   78.79   10.50
  -3  -2  12  129.49   17.20
   3  -2 -12   85.19   13.10
   3   2 -11    1.40    4.80
  -3   2  11    4.80    6.20
  -3   2  11   21.00   11.00
   3   2 -11   -3.50    7.10
  -3  -2  11   -7.30    9.70
   3  -2 -11    4.50    7.40
   3  -2 -11   -0.20    8.80
  -3  -2  11    4.90    3.60
  -3   2  10   47.70    8.00
   3   2 -10   54.99    6.30
   3   2 -10   54.19    9.40
  -3   2  10   58.09   12.10
  -3  -2  10   51.69    4.60
   3  -2 -10   64.59    9.60
  -3  -2  10   35.20   11.10
   3  -2 -10   35.70   10.30
  -3   2   9  108.39   13.00
   3   2  -9   84.09   10.40
  -3   2   9   99.59   10.00
   3   2  -9   96.29    7.30
   3   2  -9  105.59   12.10
  -3  -2   9  105.79   13.10
   3  -2  -9  105.59   12.10
   3  -2  -9  107.59   10.90
   3  -2  -9  127.99   13.90
   3   2  -8  372.16   12.10
  -3   2   8  362.86   19.10
   3   2  -8  383.36   18.60
  -3   2   8  380.36   17.20
  -3   2   8  374.56   18.50
   3   2  -8  392.16   19.60
   3  -2  -8  394.76   20.80
   3  -2  -8  372.16   18.80
   3  -2  -8  354.56   18.10
  -3  -2   8  396.86   19.70
  -3   2   7  181.28   13.10
   3   2  -7  183.98    7.00
  -3   2   7  201.88   13.60
   3   2  -7  202.88   14.00
   3   2  -7  199.88   13.60
  -3   2   7  209.88   12.60
   3  -2  -7  151.48   13.30
  -3  -2   7  227.48   14.50
   3  -2  -7  194.28   13.90
   3  -2  -7  218.58   13.90
   3   2  -6  993.50   32.00
   3   2  -6 1020.80   31.40
  -3   2   6 1031.20   32.10
   3  -2  -6  996.40   32.40
   3  -2  -6  976.60   31.80
   3  -2  -6 1015.00   32.90
  -3  -2   6  951.80   31.30
  -3   2   5  264.07   14.40
  -3   2   5  301.07   14.70
   3   2  -5  287.57   14.10
   3   2  -5  262.87   15.00
   3  -2  -5  286.47   14.70
   3  -2  -5  271.17   14.80
  -3  -2   5  269.07   13.60
   3  -2  -5  287.77   14.70
   3   2  -4   22.20    3.00
  -3   2   4   25.10    5.80
   3   2  -4   28.90    6.10
  -3   2   4   33.30    6.40
   3   2  -4   28.60    5.80
   3   2  -4   26.80    5.40
   3   2  -4   17.30    2.90
   3  -2  -4   24.80    6.50
   3  -2  -4   35.80    6.80
   3  -2  -4   31.20    7.10
   3   2  -3  933.11   28.70
   3   2  -3  858.51   24.40
   3   2  -3  901.41   26.10
  -3   2   3  935.51   28.50
  -3   2   3  918.81   27.60
   3  -2  -3  916.61   28.40
   3  -2  -3  953.60   29.00
   3  -2  -3  933.71   27.80
  -3  -2   3  866.71   24.30
   3   2  -2 1486.75   42.50
  -3   2   2 1478.85   41.60
   3   2  -2 1620.14   40.10
  -3   2   2 1469.85   42.30
   3   2  -2 1550.34   40.50
   3  -2  -2 1529.95   41.30
  -3  -2   2 1501.05   39.90
   3  -2  -2 1469.05   42.80
   3  -2  -2 1543.35   42.70
  -3  -2   2 1519.15   40.30
   3   2  -1 3694.73   92.09
   3   2  -1 3691.43   92.09
  -3   2   1 3661.53   93.69
  -3   2   1 3610.74   92.59
  -3   2   1 3707.53   93.59
  -3  -2   1 3536.25   91.89
   3  -2  -1 3701.03   92.49
   3  -2  -1 3600.24   93.19
  -3  -2   1 3749.32   91.89
   3  -2  -1 3593.44   93.69
  -3   2   0 1186.08   34.80
  -3   2   0 1195.58   34.30
  -3   2   0 1213.38   35.10
  -3   2   0 1216.08   32.80
   3   2   0 1222.28   34.50
   3   2   0 1213.58   33.70
   3  -2   0 1209.58   34.00
   3  -2   0 1228.58   35.30
  -3  -2   0 1224.58   34.60
   3  -2   0 1170.68   34.70
  -3  -2   0 1238.88   34.20
  -3   2  -1 2096.59   52.99
  -3   2  -1 1944.71   54.29
   3   2   1 2069.29   55.19
   3   2   1 1988.50   54.19
  -3   2  -1 2113.69   54.49
  -3   2  -1 1988.70   54.59
  -3   2  -1 2088.79   54.69
  -3  -2  -1 1913.31   54.59
  -3  -2  -1 2016.70   54.39
   3  -2   1 2076.09   54.59
   3  -2   1 2072.69   53.09
   3  -2   1 2031.00   54.39
  -3   2  -2  137.69    9.90
  -3   2  -2  138.49    9.50
  -3   2  -2  111.99    9.10
   3   2   2  154.58   11.40
   3  -2   2  149.29   10.40
   3  -2   2  138.89    9.90
   3  -2   2  135.19   10.10
  -3  -2  -2  138.39   10.70
  -3  -2  -2  141.19   10.60
  -3   2  -3   91.99    9.20
   3   2   3  115.99   10.80
  -3   2  -3   87.09    8.40
  -3   2  -3   90.09    7.50
   3  -2   3   72.29    8.30
   3  -2   3   81.59    8.20
   3  -2   3   96.89    8.80
  -3  -2  -3   74.69    9.50
  -3  -2  -3   93.59    9.40
  -3   2  -4  596.94   21.90
  -3   2  -4  581.44   19.70
   3   2   4  586.14   23.10
  -3   2  -4  604.24   22.90
   3  -2   4  620.54   21.60
  -3  -2  -4  604.44   23.80
   3  -2   4  579.94   23.10
  -3  -2  -4  601.14   23.70
   3  -2   4  610.64   21.70
   3   2   5  123.09    6.40
  -3   2  -5  126.99   12.80
   3   2   5  146.19   12.40
  -3   2  -5  134.29    9.30
   3   2   5  135.89    6.70
  -3   2  -5  150.18   11.60
   3  -2   5  133.39   10.90
  -3  -2  -5  112.89   11.40
   3  -2   5  146.29   13.50
   3  -2   5  155.88   11.10
  -3  -2  -5  103.49   11.30
  -3   2  -6  730.73   26.30
   3   2   6  673.63   28.60
  -3   2  -6  753.62   22.30
  -3   2  -6  733.93   28.30
  -3  -2  -6  729.03   29.70
   3  -2   6  732.53   28.80
   3  -2   6  729.43   25.70
  -3  -2  -6  656.83   27.90
  -3   2  -7  536.95   23.10
   3   2   7  509.65   26.30
  -3   2  -7  566.94   18.00
  -3  -2  -7  568.54   25.70
   3  -2   7  542.45   22.00
   3  -2   7  552.74   26.50
  -3   2  -8  130.79    8.40
  -3   2  -8  129.39    7.80
  -3   2  -8  156.38   14.10
   3   2   8  128.59   16.50
  -3  -2  -8  131.89   15.40
   3  -2   8  119.79   15.40
  -3   2  -9    2.40    8.10
   3   2   9    9.60   11.50
  -3  -2  -9   11.30   10.60
   3  -2   9   19.00   11.90
   3   2  10   60.59   13.90
  -3   2 -10   77.49   11.60
   3  -2  10   78.79   16.00
  -3  -2 -10   76.89   14.40
  -3   2 -11   62.79   11.70
   3   2  11   52.89   15.70
  -3  -2 -11   59.89   14.30
   3  -2  11   25.00   13.20
   3   2  12   86.39   17.70
  -3   2 -12   88.79   13.70
  -3  -2 -12  129.09   17.50
   3  -2  12   77.29   16.70
  -3   2 -13   38.20   11.60
   3   2  13   25.70   15.40
  -3  -2 -13   31.30   14.00
   3  -2  13   19.40   15.80
  -3   3  14  -28.50   11.00
  -3  -3  14   15.60   13.60
   3  -3 -14    1.10   10.70
  -3   3  13   34.00   13.90
   3   3 -13   18.10    9.00
  -3  -3  13   15.90   13.90
   3  -3 -13   34.80    9.30
   3  -3 -13   31.70   12.40
  -3   3  12    8.40   11.40
   3   3 -12   -1.20    7.60
   3  -3 -12   -7.00    7.10
   3  -3 -12    2.30    9.50
  -3  -3  12    1.20   11.20
  -3   3  11  224.48   19.60
   3   3 -11  199.58   15.80
  -3   3  11  209.28   14.90
   3  -3 -11  195.08   16.20
   3  -3 -11  208.68   18.30
  -3  -3  11  204.88   19.40
  -3   3  10   54.69    8.80
  -3   3  10   82.79   13.80
   3   3 -10   69.29   11.10
   3  -3 -10   64.79   12.00
  -3  -3  10   82.29   13.40
   3  -3 -10   65.89   10.70
   3   3  -9  255.37   17.80
  -3   3   9  230.48   15.30
  -3   3   9  250.37   19.00
   3  -3  -9  251.07   17.30
   3  -3  -9  278.57   18.80
  -3  -3   9  287.57   19.80
   3   3  -8  158.68   14.60
  -3   3   8  201.68   16.20
   3   3  -8  185.78   15.10
  -3   3   8  171.48   14.00
   3  -3  -8  196.78   16.10
  -3  -3   8  129.79   13.40
   3  -3  -8  193.68   15.40
   3  -3  -8  171.18   16.00
   3   3  -7    4.50    7.10
  -3   3   7    2.20    6.20
   3   3  -7   10.30    7.50
  -3   3   7    0.40    6.90
   3  -3  -7   -2.70    7.30
   3  -3  -7   10.20    7.20
   3  -3  -7   17.20    8.70
  -3  -3   7   15.20    8.00
  -3   3   6    1.30    7.30
   3   3  -6    3.40    6.50
  -3   3   6   15.90    6.40
  -3   3   6   -3.30    3.40
   3   3  -6   -2.30    5.90
   3   3  -6    3.10    6.10
   3  -3  -6    2.30    7.30
   3  -3  -6   13.70    7.50
   3  -3  -6   -4.90    6.40
  -3   3   5 1028.60   33.40
   3   3  -5  991.00   31.90
  -3   3   5  996.30   32.60
   3   3  -5 1073.69   32.10
  -3   3   5  988.20   32.80
   3   3  -5 1066.99   33.50
   3  -3  -5  956.60   33.20
   3  -3  -5  987.60   32.90
   3  -3  -5 1015.30   33.60
   3   3  -4   73.29    5.00
  -3   3   4   55.49    8.30
  -3   3   4   57.49    8.40
   3   3  -4   62.49    7.90
  -3   3   4   61.19    8.80
   3   3  -4   68.69    7.70
   3  -3  -4   36.20    8.00
  -3  -3   4   71.69    4.50
   3  -3  -4   54.99    8.50
   3  -3  -4   58.09    8.30
  -3   3   3 2371.46   65.69
  -3   3   3 2474.05   66.09
  -3   3   3 2394.36   65.59
   3   3  -3 2468.85   64.29
   3   3  -3 2445.66   61.39
  -3  -3   3 2458.65   64.09
  -3  -3   3 2366.16   61.09
   3  -3  -3 2402.36   66.29
   3  -3  -3 2465.85   65.49
   3  -3  -3 2358.16   65.69
   3   3  -2 1177.08   34.50
   3   3  -2 1234.18   33.30
  -3   3   2 1166.58   35.90
   3  -3  -2 1136.69   36.50
   3  -3  -2 1184.88   35.90
  -3  -3   2 1225.28   34.50
   3  -3  -2 1204.28   35.40
  -3  -3   2 1277.77   33.30
   3   3  -1    0.80    4.60
  -3   3   1    3.10    5.50
  -3   3   1    7.40    5.40
   3   3  -1    8.80    5.40
  -3   3   1   -3.40    5.60
  -3  -3   1    4.20    4.60
   3  -3  -1    5.80    6.20
  -3  -3   1    2.00    4.60
   3  -3  -1    0.70    4.90
   3  -3  -1   -1.20    5.90
  -3   3   0   77.79    8.70
  -3   3   0   61.69    7.40
   3   3   0   98.29    8.80
  -3   3   0   75.59    7.30
   3   3   0   82.69    8.00
  -3   3   0   73.69    8.20
   3  -3   0   62.39    8.30
  -3  -3   0   93.29    8.40
   3  -3   0   81.19    8.50
  -3  -3   0   77.69    8.00
   3  -3   0   79.49    8.20
   3   3   1  582.54   21.50
   3   3   1  583.84   21.70
  -3   3  -1  597.54   21.60
  -3   3  -1  595.24   21.00
  -3   3  -1  568.74   21.50
   3  -3   1  644.24   21.90
   3  -3   1  597.94   20.50
  -3  -3  -1  570.94   21.40
   3  -3   1  605.34   21.10
  -3   3  -2 1403.26   41.10
  -3   3  -2 1443.66   40.80
  -3   3  -2 1445.56   42.40
   3   3   2 1426.36   42.10
   3   3   2 1359.06   41.50
  -3   3  -2 1395.96   40.70
   3  -3   2 1327.27   40.30
   3  -3   2 1409.06   40.50
   3  -3   2 1452.25   40.40
  -3  -3  -2 1424.16   42.20
  -3  -3  -2 1472.15   42.40
  -3   3  -3 2241.18   62.19
   3   3   3 2368.06   64.69
  -3   3  -3 2362.36   62.79
  -3   3  -3 2284.17   64.69
  -3   3  -3 2352.46   62.89
   3   3   3 2353.06   64.69
   3  -3   3 2310.37   62.29
   3  -3   3 2335.87   62.29
  -3  -3  -3 2399.26   65.19
  -3  -3  -3 2148.58   63.99
   3  -3   3 2284.97   62.99
  -3   3  -4  138.39   11.10
  -3   3  -4  105.69    9.40
   3   3   4  138.89   12.60
  -3   3  -4  120.19   11.50
  -3   3  -4   86.19   10.50
   3  -3   4  102.99    9.50
  -3  -3  -4  142.29   13.40
   3  -3   4  123.69    9.90
   3  -3   4  113.59   11.00
  -3  -3  -4  100.89   11.30
   3   3   5  486.75   16.80
  -3   3  -5  510.95   19.20
  -3   3  -5  427.76   19.20
   3   3   5  475.45   22.10
  -3   3  -5  465.75   21.70
  -3  -3  -5  470.95   22.70
   3  -3   5  503.25   22.60
   3  -3   5  473.75   19.10
   3  -3   5  490.85   19.30
  -3  -3  -5  520.15   23.60
  -3   3  -6  103.19   10.50
  -3   3  -6  109.89   13.10
   3   3   6  102.89    8.30
  -3   3  -6  104.79    9.40
   3  -3   6   81.69   12.00
   3  -3   6  113.89   10.30
   3  -3   6  114.49   10.50
  -3  -3  -6  101.49   13.10
  -3  -3  -6  125.59   14.00
  -3   3  -7   10.90    7.40
  -3   3  -7   24.90    6.70
   3   3   7   22.10    4.30
  -3  -3  -7   11.70   10.00
   3  -3   7   35.50   10.20
   3  -3   7   21.90    7.70
   3  -3   7   25.90    7.20
   3   3   8    1.50   11.30
  -3   3  -8   -0.10    7.60
  -3   3  -8    7.10    6.10
  -3  -3  -8   -7.60    9.50
   3  -3   8    3.80    7.20
   3  -3   8    1.10    9.80
  -3   3  -9  323.37   14.80
  -3   3  -9  345.97   19.30
  -3   3  -9  319.47   14.10
   3   3   9  307.97   24.80
   3  -3   9  346.47   24.60
  -3  -3  -9  317.57   23.30
   3  -3   9  329.77   18.40
   3   3  10   19.00   13.30
  -3   3 -10   35.80    5.60
  -3   3 -10   37.30    9.90
  -3  -3 -10   30.90   12.80
   3  -3  10   40.50   13.00
  -3   3 -11  163.68   15.80
   3   3  11  169.68   20.20
   3  -3  11  165.68   20.00
  -3  -3 -11  185.28   20.60
  -3   3 -12    5.40    8.90
   3   3  12    5.90   12.80
  -3  -3 -12  -21.70   10.90
   3  -3  12  -11.40   12.60
  -3   4  14   19.20   13.30
  -3  -4  14   -0.10   13.20
   3  -4 -14   -5.00   11.30
   3   4 -13   14.30    9.50
  -3   4  13    9.10   12.70
  -3  -4  13  -14.90   11.60
   3  -4 -13   29.60   12.70
  -3   4  12   18.30   12.60
   3   4 -12   13.70    9.50
   3  -4 -12   23.30    9.30
  -3  -4  12   24.00   13.20
   3  -4 -12   -2.00   10.50
   3   4 -11   -1.30    8.40
  -3   4  11   -2.00   10.60
  -3   4  11    2.70    7.00
  -3  -4  11    1.90   11.10
   3  -4 -11    2.20   10.40
   3  -4 -11   -0.30    7.60
   3   4 -10    5.50    8.40
   3   4 -10    0.20    9.70
  -3   4  10    1.40    6.90
  -3   4  10   -4.60   10.50
   3  -4 -10   15.00    9.00
   3  -4 -10    8.70   10.00
  -3  -4  10    2.30   10.40
   3   4  -9  313.37   22.00
   3   4  -9  322.57   20.40
  -3   4   9  304.57   18.80
  -3  -4   9  333.87   22.70
   3  -4  -9  286.37   21.00
   3  -4  -9  328.17   20.50
   3   4  -8   20.30    9.30
  -3   4   8   15.80    7.90
   3   4  -8   14.50    8.40
   3  -4  -8   22.90    9.40
   3  -4  -8   25.30    9.80
   3   4  -7  488.45   22.90
   3   4  -7  496.65   23.10
  -3   4   7  462.75   21.90
  -3   4   7  452.35   24.40
   3   4  -7  486.85   23.20
  -3   4   7  484.35   22.10
   3  -4  -7  479.05   24.80
   3  -4  -7  479.65   23.80
   3  -4  -7  487.65   23.10
   3   4  -6    5.80    7.00
  -3   4   6   17.00    7.70
  -3   4   6    8.50    8.70
  -3   4   6   15.10    8.40
   3   4  -6   11.60    7.30
   3  -4  -6   17.70    9.30
   3  -4  -6   19.60    8.80
   3  -4  -6    8.30    8.80
   3   4  -5 1071.29   35.00
  -3   4   5 1075.79   36.00
   3   4  -5 1086.59   28.40
  -3   4   5 1184.08   37.00
   3   4  -5 1062.49   35.20
  -3   4   5 1079.69   36.80
   3  -4  -5 1112.19   37.00
   3  -4  -5 1078.39   36.30
   3  -4  -5 1106.39   37.30
  -3   4   4  137.69   12.60
  -3   4   4  147.69   13.20
   3   4  -4  140.59   11.40
  -3   4   4  138.79   12.50
   3   4  -4  156.18    7.90
   3   4  -4  162.98   12.80
   3  -4  -4  153.88   13.10
  -3  -4   4  166.18   12.10
  -3  -4   4  145.39    7.40
   3  -4  -4  110.59   11.50
   3  -4  -4  129.99   12.50
   3   4  -3   90.49    7.10
   3   4  -3  107.89   10.40
  -3   4   3   85.49   10.50
  -3   4   3  101.79   10.50
  -3   4   3   91.89   11.10
   3  -4  -3  103.89   11.40
   3  -4  -3   97.39   10.00
  -3  -4   3   98.09    9.40
  -3  -4   3  100.59    7.60
   3  -4  -3  103.79   11.40
  -3   4   2   41.00    8.30
   3   4  -2   45.50    7.90
  -3   4   2   28.00    8.10
  -3   4   2   41.50    8.30
   3   4  -2   39.70    6.20
  -3  -4   2   26.50    6.00
   3  -4  -2   33.30    9.00
   3  -4  -2   44.00    8.00
   3  -4  -2   52.99    9.00
  -3  -4   2   32.20    5.70
  -3   4   1 2079.89   56.29
   3   4  -1 2068.59   54.19
   3   4  -1 2072.49   56.19
  -3   4   1 1967.70   56.39
  -3   4   1 2003.00   56.69
  -3  -4   1 1997.40   53.99
   3  -4  -1 1958.20   55.79
   3  -4  -1 1907.91   56.69
   3  -4  -1 2000.00   55.89
  -3  -4   1 1808.42   54.69
  -3   4   0   25.70    7.50
   3   4   0   25.10    7.50
   3   4   0   39.50    7.40
  -3   4   0   19.80    6.90
  -3   4   0   32.00    7.60
   3  -4   0   38.90    7.50
  -3  -4   0   30.60    7.20
  -3  -4   0   30.10    6.90
   3  -4   0   27.20    7.40
  -3   4  -1 1304.87   39.70
  -3   4  -1 1325.77   41.20
   3   4   1 1336.37   41.10
  -3   4  -1 1330.97   39.40
  -3   4  -1 1320.97   41.10
   3   4   1 1336.37   40.40
  -3  -4  -1 1362.76   40.80
  -3  -4  -1 1386.76   41.50
   3  -4   1 1305.17   39.20
   3  -4   1 1347.87   41.00
   3  -4   1 1355.26   39.90
  -3   4  -2   82.99    9.90
  -3   4  -2   81.09    9.10
   3   4   2   77.29   10.10
  -3   4  -2   93.19   10.20
  -3   4  -2   91.39   10.20
   3   4   2   74.49   10.30
   3  -4   2   87.29    9.20
   3  -4   2   97.79    9.10
  -3  -4  -2   70.09    9.90
  -3  -4  -2   83.29   10.90
   3   4   3  131.69   12.70
  -3   4  -3  125.89   11.30
   3   4   3  105.99   12.20
  -3   4  -3  113.29   10.20
  -3   4  -3  122.69   12.10
  -3   4  -3  117.79   11.50
  -3  -4  -3  104.39   12.10
   3  -4   3  103.09    9.30
   3  -4   3  108.29    9.80
  -3  -4  -3  121.79   12.40
   3   4   4    8.60    8.70
   3   4   4    1.10    7.30
  -3   4  -4   -3.30    6.80
  -3   4  -4    1.40    6.70
  -3   4  -4    7.20    7.50
   3  -4   4   -1.90    5.40
   3  -4   4   -3.50    7.40
  -3  -4  -4    0.00    8.50
  -3  -4  -4   -8.40    7.60
   3  -4   4    6.90    5.80
  -3   4  -5  240.38   18.80
   3   4   5  258.27   18.00
  -3   4  -5  247.08   15.70
  -3   4  -5  240.98   17.40
   3  -4   5  240.58   18.30
   3  -4   5  244.98   14.20
  -3  -4  -5  266.67   19.90
   3  -4   5  253.67   14.50
  -3  -4  -5  271.87   18.80
  -3   4  -6    0.20    8.80
   3   4   6    4.40    4.50
  -3   4  -6   10.10    7.00
  -3   4  -6    3.60    7.20
  -3  -4  -6    4.60    9.60
   3  -4   6    0.00    6.00
   3  -4   6  -14.00    8.10
   3  -4   6    9.80    6.40
   3   4   7  295.47   14.10
  -3   4  -7  319.57   24.10
  -3   4  -7  266.97   16.70
  -3   4  -7  295.87   17.30
   3  -4   7  308.47   22.40
  -3  -4  -7  277.77   21.90
   3  -4   7  298.07   16.40
   3   4   8  111.79    8.40
  -3   4  -8  138.49   12.00
  -3   4  -8  101.09   11.90
   3  -4   8  121.29   11.60
   3  -4   8  101.09   16.00
  -3  -4  -8  110.79   15.40
   3   4   9   85.29   16.00
  -3   4  -9   84.39   11.10
  -3   4  -9   92.19   10.30
   3  -4   9   91.59   10.60
   3  -4   9   70.39   15.10
  -3  -4  -9   62.49   14.20
  -3   4 -10   47.00    7.90
   3   4  10   63.09   16.20
  -3   4 -10   56.39   10.60
  -3  -4 -10   60.79   14.90
   3  -4  10   42.70   15.10
  -3   4 -11   30.00    9.50
   3   4  11   22.60   14.30
   3  -4  11   23.30   14.40
  -3  -4 -11    4.30   12.00
  -3   4 -12   20.70    9.40
   3   4  12   19.80   15.10
  -3  -4 -12   20.70   14.30
   3  -4  12   26.80   15.30
   3   5 -13   11.20   12.30
   3   5 -13   -3.40    9.20
  -3   5  13   17.70   13.50
   3  -5 -13   -0.40   11.90
   3   5 -12    1.00   11.20
   3   5 -12   10.90    9.80
  -3   5  12   19.40   12.80
   3  -5 -12    4.60   11.80
  -3   5  11  176.38   16.20
   3   5 -11  179.98   18.80
   3   5 -11  209.88   18.30
   3  -5 -11  182.98   20.10
   3   5 -10   12.80    9.60
   3   5 -10    7.20    9.80
  -3   5  10    5.40    7.80
   3  -5 -10   15.00   10.90
   3   5  -9  271.57   22.30
   3   5  -9  255.97   20.20
  -3   5   9  220.98   18.10
   3  -5  -9  281.37   22.60
   3  -5  -9  247.58   20.00
   3   5  -8   -3.00    8.60
  -3   5   8    7.70    8.40
   3   5  -8    5.80    9.40
  -3   5   8   -2.20   10.90
   3  -5  -8    0.10    9.50
   3  -5  -8   -1.50    9.00
  -3   5   7   10.80    8.40
  -3   5   7   10.00   10.50
   3   5  -7   -5.50    8.50
   3  -5  -7   10.10    9.60
   3  -5  -7   19.00    9.40
   3   5  -6   17.00    8.20
  -3   5   6   -4.40    8.40
  -3   5   6   14.00   10.20
  -3   5   6    2.20    8.00
   3   5  -6  -12.50    7.60
   3  -5  -6    3.90    8.80
   3  -5  -6    2.80    9.10
   3  -5  -6   -0.60    8.50
   3   5  -5   64.19   10.70
  -3   5   5   53.99   11.70
  -3   5   5   69.49   11.10
   3   5  -5   50.69    5.40
  -3   5   5   42.80    9.60
   3   5  -5   42.70    9.10
   3  -5  -5   55.69   10.90
   3  -5  -5   53.99   11.70
   3  -5  -5   41.50   10.20
  -3  -5   5   62.39    4.80
   3   5  -4  174.98    9.90
  -3   5   4  178.38   15.60
  -3   5   4  167.78   13.90
  -3   5   4  188.98   15.40
   3   5  -4  166.28   13.50
  -3  -5   4  159.88    9.00
  -3  -5   4  194.88   14.40
   3  -5  -4  137.09   13.60
   3  -5  -4  198.08   15.70
  -3   5   3  700.03   27.20
  -3   5   3  633.74   26.50
   3   5  -3  630.34   25.70
  -3   5   3  657.23   27.80
   3   5  -3  647.84   21.80
  -3  -5   3  658.53   25.40
  -3  -5   3  634.34   21.30
   3  -5  -3  684.93   27.10
   3  -5  -3  674.23   26.80
   3   5  -2   41.80    7.00
  -3   5   2   38.60    9.70
  -3   5   2   49.50    8.90
   3   5  -2   46.90    9.10
  -3   5   2   49.20    9.70
   3  -5  -2   57.99   10.00
  -3  -5   2   57.59    8.80
   3  -5  -2   45.20    8.60
  -3  -5   2   41.90    6.80
  -3   5   1    0.60    6.50
   3   5  -1   15.90    8.00
   3   5  -1   19.00    6.40
  -3   5   1   -0.80    4.30
  -3   5   1   -3.40    7.50
  -3  -5   1    4.80    6.00
   3  -5  -1    3.00    7.10
  -3  -5   1    1.20    6.10
   3  -5  -1    9.40    6.70
   3   5   0   41.60    7.60
   3   5   0   25.80    8.70
  -3   5   0   26.90    9.00
  -3   5   0   27.00    7.70
  -3   5   0   49.20    8.90
  -3  -5   0   36.80    7.90
  -3  -5   0   34.70    8.10
   3  -5   0   38.40    8.50
   3  -5   0   38.90    8.20
  -3   5  -1  472.95   20.80
   3   5   1  456.25   22.80
  -3   5  -1  492.15   21.00
   3   5   1  489.45   21.00
  -3   5  -1  495.55   22.70
  -3   5  -1  475.95   22.50
   3  -5   1  509.35   20.70
  -3  -5  -1  436.16   20.80
  -3  -5  -1  432.76   21.90
   3  -5   1  460.55   21.50
  -3   5  -2   52.69    9.90
  -3   5  -2   49.40    9.80
  -3   5  -2   39.70    8.60
   3   5   2   48.60   10.60
  -3   5  -2   44.00    8.30
   3   5   2   51.19    9.70
   3  -5   2   44.50    7.80
   3  -5   2   66.59    9.10
   3  -5   2   58.79    9.10
  -3  -5  -2   60.99   10.60
  -3  -5  -2   57.19   10.50
   3   5   3 1014.50   35.90
   3   5   3 1017.10   37.00
  -3   5  -3 1029.70   35.20
  -3   5  -3 1001.40   35.30
  -3   5  -3 1017.10   33.50
  -3   5  -3 1023.30   36.90
   3  -5   3 1065.99   33.00
   3  -5   3 1032.70   33.30
  -3  -5  -3 1000.90   37.60
  -3  -5  -3 1016.50   36.60
   3   5   4  110.09   13.30
  -3   5  -4  134.09   13.30
  -3   5  -4  133.99   13.50
  -3   5  -4  122.29   11.40
  -3   5  -4  110.89   13.90
   3   5   4  109.49   14.10
  -3  -5  -4  117.89   15.20
   3  -5   4   92.19   10.00
   3  -5   4  112.89   10.80
  -3  -5  -4  103.39   13.90
   3   5   5  139.79   16.50
  -3   5  -5   98.99   14.50
  -3   5  -5  131.49   13.50
   3   5   5  112.49   10.90
   3  -5   5  120.09   10.80
  -3  -5  -5  150.38   16.60
   3  -5   5  126.69   11.10
   3   5   6  569.24   22.40
  -3   5  -6  591.04   25.60
  -3   5  -6  539.85   29.20
  -3  -5  -6  537.85   28.50
   3  -5   6  511.95   27.50
   3  -5   6  566.24   22.40
   3   5   7    8.50    6.90
  -3   5  -7   15.10    8.80
  -3   5  -7    4.30   10.80
  -3  -5  -7   10.60   11.20
   3  -5   7    0.20    6.60
   3  -5   7    4.40   10.30
  -3   5  -8   -1.20    7.20
  -3   5  -8   -5.60   11.00
   3   5   8   -0.90    5.80
   3  -5   8   -1.90    6.40
   3  -5   8   11.40   10.90
  -3  -5  -8   -0.40   11.20
  -3   5  -9   98.19   16.30
  -3  -5  -9  131.69   18.10
   3  -5   9  126.09   17.60
   3   5  10   83.29   18.30
  -3   5 -10   61.99   15.90
   3  -5  10   40.10   15.40
  -3  -5 -10   61.39   15.70
  -3   5 -11   41.30   15.80
   3   5  11   18.80   15.80
  -3  -5 -11   37.90   15.70
   3  -5  11   59.69   17.00
  -3   6  13  -13.10   13.00
   3   6 -13   -0.90   10.60
   3   6 -13   25.00   13.60
   3  -6 -13    0.20   12.50
   3   6 -12    1.00   10.70
   3   6 -12  -19.70   11.10
  -3   6  12   -4.60   13.30
   3  -6 -12    3.40   12.80
   3   6 -11   -1.00   11.60
   3   6 -11   10.10   10.00
   3  -6 -11   14.40   13.20
   3   6 -10   13.60   10.00
   3   6 -10   30.30   12.60
   3  -6 -10   21.00   12.50
   3   6  -9  127.79   16.00
  -3   6   9  107.29   17.30
   3   6  -9  104.19   15.20
   3  -6  -9  116.39   16.90
  -3   6   8  123.99   17.00
   3   6  -8  104.49   15.10
   3  -6  -8   92.89   15.40
  -3   6   7  246.68   21.40
   3   6  -7  163.18   16.50
   3  -6  -7  200.88   19.00
   3   6  -6   31.60   10.40
   3   6  -6   28.40    5.00
  -3   6   6   23.90   12.40
   3  -6  -6   23.10   11.50
  -3   6   5  162.88   16.90
  -3   6   5  186.18   18.90
  -3   6   5  158.38   15.50
   3   6  -5  169.68   15.60
   3   6  -5  174.58   10.50
  -3  -6   5  172.08    9.30
   3  -6  -5  189.78   18.00
  -3   6   4   17.80   11.10
   3   6  -4   29.80    6.40
  -3   6   4   19.30    9.90
   3   6  -4   26.20    9.80
  -3   6   4   30.30    9.90
  -3  -6   4   29.10    5.80
  -3  -6   4   21.00    8.30
   3  -6  -4   29.00    9.30
   3  -6  -4   26.40   10.80
   3   6  -3  120.19   10.50
  -3   6   3  155.08   15.50
  -3   6   3   90.59   11.90
   3   6  -3  123.19   13.70
  -3   6   3  111.09   14.80
   3  -6  -3  145.19   15.10
  -3  -6   3  123.19   10.00
  -3  -6   3  107.79   12.40
   3  -6  -3  113.59   13.30
  -3   6   2  415.26   22.20
  -3   6   2  456.55   22.80
  -3   6   2  433.06   24.60
   3   6  -2  400.66   18.70
   3   6  -2  461.75   23.80
  -3  -6   2  408.56   18.50
   3  -6  -2  406.16   21.90
  -3  -6   2  468.65   21.80
   3  -6  -2  414.96   22.40
   3   6  -1  850.91   33.80
  -3   6   1  934.31   33.40
  -3   6   1  871.91   34.70
   3   6  -1  921.51   30.90
   3  -6  -1  883.61   32.60
  -3  -6   1  904.71   33.00
  -3  -6   1  923.11   31.10
   3  -6  -1  883.41   33.10
  -3   6   0  323.37   20.50
  -3   6   0  323.37   19.60
  -3   6   0  300.97   21.50
   3   6   0  321.77   18.30
   3   6   0  307.87   21.20
  -3  -6   0  352.06   20.30
   3  -6   0  342.77   18.80
  -3  -6   0  317.87   17.90
   3  -6   0  343.87   19.90
   3   6   1  252.77   19.00
   3   6   1  258.57   17.30
  -3   6  -1  241.58   18.90
  -3   6  -1  258.67   17.10
  -3   6  -1  268.77   17.90
  -3   6  -1  268.37   20.10
   3  -6   1  262.37   18.10
  -3  -6  -1  304.87   19.10
  -3  -6  -1  302.67   18.10
   3  -6   1  252.17   17.20
  -3   6  -2  119.49   14.40
  -3   6  -2  191.98   16.30
   3   6   2  131.89   14.20
   3   6   2  131.99   15.40
  -3   6  -2  163.18   13.80
  -3   6  -2  156.48   14.90
  -3  -6  -2  130.59   14.20
  -3  -6  -2  135.79   14.80
   3  -6   2  144.39   12.90
   3  -6   2  123.29   11.80
  -3   6  -3   15.20   10.30
  -3   6  -3    1.70    9.10
  -3   6  -3    3.20    7.00
   3   6   3    3.30   10.50
   3   6   3   19.30    9.30
  -3  -6  -3   13.80    9.40
   3  -6   3    6.80    7.20
   3   6   4    6.30    9.80
  -3   6  -4   10.30    7.70
   3   6   4   -2.50   10.80
  -3   6  -4    1.20   10.40
  -3   6  -4   -7.50    8.90
   3  -6   4    7.20    7.20
  -3  -6  -4    1.60   10.20
   3   6   5  399.36   21.00
  -3   6  -5  419.86   24.00
  -3   6  -5  391.46   25.80
   3   6   5  414.86   28.60
   3  -6   5  425.66   20.00
  -3  -6  -5  387.26   25.80
  -3   6  -6   -0.70   10.90
   3   6   6  -11.60   11.60
   3   6   6   14.50    7.80
   3  -6   6   24.50    7.80
  -3  -6  -6   30.60   12.50
   3   6   7   -4.20    7.00
  -3   6  -7  -13.40   10.30
  -3  -6  -7   -0.20   11.20
   3  -6   7    2.20    6.80
  -3   6  -8   81.59   16.20
  -3  -6  -8   73.79   15.90
  -3   6  -9  -14.20   11.70
  -3  -6  -9   -9.70   11.20
  -3   6 -10  -26.10   12.50
   3  -6  10   11.00   14.30
  -3  -6 -10   -9.60   11.60
  -3   6 -11   26.70   16.40
   3   6  11  -19.20   14.30
  -3  -6 -11   29.90   15.00
   3  -6  11   29.80   16.40
   3   7 -12   -7.10   10.30
   3   7 -12   27.90   14.80
   3  -7 -12   14.50   14.40
   3   7 -11   38.20   12.40
   3   7 -11   49.99   15.70
   3  -7 -11   30.10   14.90
   3   7 -10   87.59   16.60
   3   7 -10  104.59   15.80
  -3   7  10   92.69   18.00
   3  -7 -10   66.79   16.20
   3   7  -9    9.40   11.50
  -3   7   9   11.40   13.80
   3  -7  -9    1.70   12.40
  -3   7   8    3.00   13.10
   3   7  -8    3.50   10.50
   3  -7  -8   26.00   12.90
   3   7  -7   15.40   11.20
  -3   7   7    2.20   12.70
   3   7  -7    8.70    4.00
   3  -7  -7    7.00   11.50
   3   7  -6  236.68   20.00
   3   7  -6  278.47   13.20
  -3   7   6  258.57   23.40
   3  -7  -6  226.98   20.50
  -3  -7   6  279.17   11.00
  -3  -7   6  254.37   10.80
   3   7  -5   12.70    6.50
  -3   7   5   14.20   13.50
   3   7  -5   16.10   11.30
   3  -7  -5   34.10   12.40
  -3  -7   5   32.70    6.00
   3   7  -4  460.35   27.20
   3   7  -4  502.25   20.20
  -3   7   4  468.95   30.30
  -3  -7   4  428.96   18.70
   3  -7  -4  461.65   26.60
   3   7  -3  191.58   18.40
   3   7  -3  223.98   15.10
  -3   7   3  200.08   18.20
  -3   7   3  171.98   18.60
   3  -7  -3  200.78   18.50
  -3  -7   3  207.28   14.10
  -3   7   2   58.79   13.70
   3   7  -2   74.29   10.20
  -3   7   2   52.69   11.40
   3   7  -2   91.49   14.80
  -3  -7   2   64.59    9.90
   3  -7  -2  110.09   14.70
  -3   7   1   -1.60   10.90
   3   7  -1    4.00   11.10
   3   7  -1    5.90    7.80
  -3   7   1   -6.50    8.10
   3  -7  -1   14.60    9.10
  -3  -7   1   -1.50    7.10
   3   7   0   36.30   11.90
   3   7   0   28.60    9.10
  -3   7   0   18.70   11.10
  -3   7   0   16.30    9.20
   3  -7   0    8.20    9.30
  -3  -7   0   22.60    9.30
   3   7   1    6.00    8.80
  -3   7  -1   20.20   11.20
  -3   7  -1   11.50    9.00
   3   7   1   12.20   11.40
  -3  -7  -1    8.40    9.60
   3  -7   1   13.80    8.70
  -3   7  -2  262.87   22.10
  -3   7  -2  303.57   19.50
   3   7   2  317.67   20.30
   3   7   2  291.77   24.10
   3  -7   2  295.97   18.30
  -3  -7  -2  294.27   21.10
  -3   7  -3   41.00   13.00
   3   7   3   25.70   11.00
   3   7   3    6.60   13.00
  -3   7  -3   29.70    9.60
  -3  -7  -3   40.90   12.50
   3  -7   3   10.90    8.40
   3   7   4  198.28   20.30
  -3   7  -4  199.88   16.50
  -3   7  -4  204.58   20.20
   3  -7   4  217.08   16.00
  -3  -7  -4  154.58   17.80
  -3   7  -5   36.10   13.50
   3   7   5   16.00   13.50
  -3   7  -5   42.60    9.80
  -3  -7  -5   46.00   14.30
   3  -7   5   39.70    9.00
  -3   7  -6   -0.80   11.90
   3   7   6   27.80   13.80
   3  -7   6    7.80    7.40
  -3  -7  -6   17.50   13.70
   3   7   7   65.29   17.50
  -3   7  -7   67.49   16.20
  -3  -7  -7   64.79   15.70
  -3   7  -8   29.30   15.00
  -3  -7  -8   -4.40   12.40
  -3   7  -9   28.70   16.00
  -3  -7  -9   16.00   14.00
  -3   7 -10   36.10   17.00
  -3  -7 -10   59.19   16.90
   3   8 -11   17.90   14.00
   3   8 -11    9.90   11.70
   3  -8 -11    6.10   14.70
  -3   8  10   25.50   15.90
   3   8 -10   -3.80   12.60
   3  -8 -10    2.40   13.30
   3   8  -9   24.80   14.50
  -3   8   9   27.70   16.10
   3  -8  -9   12.70   13.20
   3   8  -8   70.29   15.20
  -3   8   8   55.29   16.30
   3  -8  -8   49.10   15.60
   3   8  -7    9.70   12.00
  -3   8   7   17.90   14.30
   3  -8  -7   11.50   11.80
   3   8  -6  125.49   10.40
   3   8  -6  120.49   16.60
  -3   8   6  163.48   21.00
   3  -8  -6  138.99   18.80
   3   8  -5    6.60   11.70
   3   8  -5    3.80    6.50
  -3   8   5   -9.10   13.50
   3  -8  -5   -5.90    9.30
  -3  -8   5    3.10    5.70
   3   8  -4   55.69    9.60
   3   8  -4   52.89   13.90
  -3   8   4   66.19   16.10
  -3  -8   4   47.70    8.50
   3  -8  -4   59.69   14.30
   3   8  -3  101.79   16.80
   3   8  -3  109.49   12.10
  -3   8   3   97.69   17.70
   3  -8  -3  100.19   16.00
  -3  -8   3   98.79   11.60
  -3   8   2  203.88   19.20
  -3   8   2  212.78   22.20
   3   8  -2  185.98   19.90
   3   8  -2  237.88   17.40
   3  -8  -2  216.58   20.00
  -3  -8   2  225.48   16.80
   3   8  -1   21.40    9.40
  -3   8   1    5.80    9.90
  -3   8   1   -2.80   12.30
   3   8  -1    5.70   12.60
  -3  -8   1   18.60    9.30
   3  -8  -1    9.00   10.10
  -3   8   0  198.88   20.30
   3   8   0  201.28   17.30
  -3   8   0  218.18   18.70
   3   8   0  198.98   21.70
  -3  -8   0  175.78   16.60
   3  -8   0  185.58   17.60
  -3   8  -1   50.39   12.00
   3   8   1   76.89   12.90
   3   8   1   57.09   15.30
  -3   8  -1   64.79   14.90
  -3  -8  -1   70.89   13.60
   3  -8   1   55.49   11.50
   3   8   2   30.40   11.30
  -3   8  -2   23.00   10.20
  -3   8  -2   47.50   14.50
   3   8   2   28.70   14.00
   3  -8   2   37.00   10.60
  -3  -8  -2   23.70   11.50
   3   8   3    9.30   13.30
  -3   8  -3   -0.40   12.20
  -3   8  -3    0.70    8.10
  -3  -8  -3   -6.00   10.70
   3  -8   3   -1.50    8.10
  -3   8  -4   37.90   11.20
   3   8   4   44.50   14.60
  -3   8  -4   16.60   12.90
  -3  -8  -4   24.30   13.10
   3  -8   4   14.40    8.70
  -3   8  -5    4.00   12.60
   3   8   5    4.10   13.20
  -3  -8  -5   14.50   12.10
   3   8   6  149.39   21.20
  -3   8  -6  191.58   22.20
  -3  -8  -6  171.18   20.80
  -3   8  -7   25.40   15.30
   3   8   7   27.00   15.90
  -3  -8  -7   26.20   14.10
  -3   8  -8   86.59   19.40
  -3  -8  -8  107.19   19.40
  -3   8  -9    8.10   15.60
  -3  -8  -9   -1.90   13.40
   3   9  -9    0.20   13.50
  -3   9   9    3.20   15.40
   3  -9  -9    1.60   13.60
   3   9  -8  -18.60   11.50
  -3   9   8    1.90   15.20
   3  -9  -8   -4.60   12.70
  -3   9   7   12.40   15.90
   3   9  -7   13.60   13.40
   3  -9  -7   25.30   12.90
  -3   9   6   26.10   15.90
   3   9  -6   30.70   14.10
   3  -9  -6   14.20   12.50
   3   9  -5    5.40   13.40
  -3   9   5   10.10   15.30
   3  -9  -5  -14.30   11.30
  -3   9   4   42.30   17.00
   3   9  -4   73.59   16.90
   3  -9  -4   78.89   16.20
   3   9  -3   37.90   15.30
  -3   9   3   51.89   16.10
  -3  -9   3   40.30    9.80
   3  -9  -3   44.50   13.60
  -3   9   2   93.49   18.90
   3   9  -2  103.89   17.90
  -3  -9   2  125.19   14.00
   3  -9  -2  100.39   15.80
   3   9  -1  -19.80   12.30
  -3   9   1    4.30   14.20
   3   9  -1    3.10    9.50
  -3   9   1    0.10    9.50
  -3  -9   1    1.70    8.90
   3  -9  -1    3.40   10.90
  -3   9   0   26.80   14.50
   3   9   0   26.00    9.90
  -3   9   0   26.20   11.40
   3   9   0    9.70   13.60
   3  -9   0   30.90   11.70
  -3  -9   0   23.30   10.50
   3   9   1   -3.00   13.40
  -3   9  -1  -23.10   11.80
   3   9   1   -2.50    9.30
  -3   9  -1   -2.70    9.70
  -3  -9  -1    7.70   10.40
   3  -9   1   -1.90    9.20
  -3   9  -2   57.19   16.10
   3   9   2   60.09   16.10
  -3  -9  -2   54.99   13.60
   3  -9   2   69.89   12.80
  -3   9  -3   26.10   15.10
   3   9   3   40.50   15.30
  -3  -9  -3   20.60   12.50
   3  -9   3   30.90   10.30
  -3   9  -4   79.99   17.60
   3   9   4   91.09   18.70
  -3  -9  -4  100.79   17.30
   3   9   5    5.60   15.10
  -3   9  -5    4.30   14.10
  -3  -9  -5   15.30   14.40
  -3   9  -6   -6.80   14.10
   3   9   6   -8.50   14.80
  -3  -9  -6  -15.30   12.70
  -3   9  -7   10.70   16.10
   3   9   7   16.80   15.90
  -3  -9  -7   14.00   14.10
  -3  10   7   34.00   17.80
   3  10  -7    5.80   14.90
   3 -10  -7   17.70   14.90
   3  10  -6   16.80   15.70
  -3  10   6   11.10   16.70
   3 -10  -6   -8.50   12.00
  -3  10   5  -10.70   15.90
   3  10  -5   -3.20   14.70
   3 -10  -5   11.50   13.80
   3  10  -4   14.00   15.00
  -3  10   4    2.20   16.10
   3 -10  -4    1.60   12.40
  -3  10   3   -8.70   15.50
   3  10  -3    0.10   15.00
   3 -10  -3   -3.30   12.50
  -3  10   2    9.70   16.40
   3  10  -2   17.70   16.60
   3 -10  -2   24.90   12.50
   3  10  -1   37.10   17.00
  -3  10   1   33.80   18.00
   3 -10  -1    4.80   11.70
   3  10   0   33.10   17.80
  -3  10   0   32.10   17.70
   3 -10   0   37.90   13.70
  -3 -10   0   37.70   12.50
   3  10   1   21.20   16.80
  -3  10  -1   51.89   18.00
   3 -10   1   42.90   13.20
  -3 -10  -1   53.09   13.80
  -3  10  -2   -7.10   15.00
   3  10   2   11.90   15.20
  -3 -10  -2   13.20   12.70
   3  10   3   12.50   15.60
  -3  10  -3    6.30   15.50
  -3 -10  -3   -1.20   12.40
   3  10   4    0.20   15.80
  -3  10  -4   23.20   16.50
  -3 -10  -4   25.10   14.90
   3  10   5   36.50   16.90
  -3  10  -5   11.30   15.90
  -3 -10  -5   -5.50   13.40
  -3  11   4    9.10   19.90
   3  11  -4   -7.30   16.80
   3 -11  -4   -6.50   13.50
   3  11  -3   82.39   21.70
  -3  11   3   -0.40   18.90
   3 -11  -3   49.30   15.50
  -3  11   2  -20.80   17.80
   3  11  -2    9.60   17.10
   3 -11  -2   39.30   14.70
   3  11  -1   29.40   17.90
  -3  11   1   15.10   18.30
   3  11   0  -10.00   16.40
  -3  11   0   -1.30   17.40
   3  11   1    8.40   17.80
  -3  11  -1   17.50   18.30
  -3  11  -2   17.10   17.30
   3  11   2   29.60   18.00
   4   0 -15   -3.30    8.10
  -4   0  15   18.10   13.40
   4   0 -14    3.40    8.10
   4   0 -14    2.90    8.00
  -4   0  14    2.80   12.60
  -4   0  13   -6.50   10.50
   4   0 -13   -8.50    6.70
   4   0 -13  -12.30    7.20
  -4   0  12   13.10   10.90
   4   0 -12   26.30    8.20
   4   0 -12    5.90    7.70
  -4   0  11   10.90    9.70
   4   0 -11   -4.60    7.30
   4   0 -11    6.00    7.00
  -4   0  11    4.10    6.00
  -4   0  10  232.48   13.90
  -4   0  10  241.38   17.90
   4   0 -10  226.58   14.50
   4   0 -10  280.77   17.10
  -4   0  10  252.37   15.40
   4   0  -9   -3.00    6.60
  -4   0   9   -0.90    5.60
  -4   0   9   -3.70    5.10
  -4   0   9   -5.70    7.30
   4   0  -9    3.70    5.60
  -4   0   8 1252.97   35.50
   4   0  -8 1189.28   35.80
   4   0  -8 1221.08   38.30
  -4   0   8 1207.08   37.90
  -4   0   8 1210.28   37.50
   4   0  -7    1.20    5.90
  -4   0   7    4.50    5.80
   4   0  -7   -0.70    5.20
   4   0  -7    6.10    4.80
  -4   0   7   -2.60    4.10
  -4   0   7   -0.90    5.20
   4   0  -6   17.90    5.40
  -4   0   6   36.10    6.90
   4   0  -6   31.90    6.00
  -4   0   6   33.60    6.10
   4   0  -6   29.70    7.10
  -4   0   6   17.90    4.90
   4   0  -5   -0.20    5.60
  -4   0   5    0.30    3.00
   4   0  -5    1.50    4.50
   4   0  -5   -4.60    3.60
  -4   0   5    0.90    3.90
  -4   0   5   -3.90    3.70
   4   0  -4 1462.25   40.10
   4   0  -4 1463.25   38.90
   4   0  -4 1519.15   37.80
   4   0  -4 1453.55   42.30
  -4   0   4 1475.15   37.70
   4   0  -4 1465.15   40.20
  -4   0   4 1512.95   40.30
   4   0  -3   -0.30    4.60
   4   0  -3    2.00    4.40
   4   0  -3   -2.80    2.70
   4   0  -3   -0.40    5.30
  -4   0   3   -1.80    3.90
   4   0  -3   -2.20    2.30
  -4   0   3   -3.00    2.80
   4   0  -2  199.38   11.30
   4   0  -2  221.88   12.30
   4   0  -2  209.48   10.80
  -4   0   2  203.88   11.60
  -4   0   2  202.58   11.00
   4   0  -1    0.20    5.10
  -4   0   1   -2.50    4.90
   4   0  -1    2.30    5.40
  -4   0   1   -4.60    4.60
   4   0  -1    0.90    5.10
  -4   0   0  173.68    9.80
   4   0   0  160.38    8.60
   4   0   0  157.78   10.10
  -4   0   0  152.58   10.50
   4   0   0  163.18   10.20
  -4   0  -1    9.10    4.30
  -4   0  -1    1.30    5.20
   4   0   1    4.50    4.60
   4   0   1    5.90    5.30
   4   0   1    9.80    4.40
   4   0   2  827.92   23.80
  -4   0  -2  858.71   27.60
   4   0   2  854.01   27.10
  -4   0  -2  805.92   23.60
   4   0   2  797.32   25.90
   4   0   3   -1.00    1.90
  -4   0  -3   -1.00    3.00
   4   0   3    2.50    3.40
   4   0   3    1.00    6.20
  -4   0  -3    4.50    6.40
  -4   0  -4 9987.50  240.28
   4   0   4 9999.00  240.38
  -4   0  -4 9678.13  246.38
   4   0   4 9951.40  246.48
   4   0   4 9823.82  242.48
   4   0   5    1.20    6.40
  -4   0  -5   11.10    7.80
   4   0   5    9.00    7.90
   4   0   6 1692.23   51.59
   4   0   6 1645.14   50.19
  -4   0  -6 1630.34   50.39
  -4   0  -7    4.30    8.40
   4   0   7   20.20   10.20
  -4   0  -8   14.80   10.00
   4   0   8   12.30   10.40
   4   0   9    1.20   11.00
  -4   0  -9   -0.80    8.60
   4   0  10  162.48   19.80
  -4   0 -10  103.79   14.70
   4   0  11    2.80   12.50
  -4   0 -11   -4.60    9.60
  -4   0 -12   43.20   13.20
   4   0  12   36.90   15.30
   4   1 -15   -3.40    7.00
  -4   1  15   11.00   13.10
  -4  -1  15   -2.30   12.60
   4  -1 -15   -1.60    9.10
  -4   1  14    0.70   11.90
   4   1 -14   10.80    7.50
   4   1 -14   26.70    9.30
   4  -1 -14   24.30   10.10
  -4  -1  14    9.80   12.50
   4  -1 -14   14.30    9.60
   4   1 -13   12.60    8.30
   4   1 -13    6.30    6.90
  -4   1  13   26.50   11.90
   4  -1 -13    1.10    8.20
   4  -1 -13    0.60    8.10
  -4  -1  13    6.10   11.30
   4   1 -12  151.58   12.10
  -4   1  12  151.88   17.30
   4   1 -12  139.99   13.80
  -4   1  12  130.79   12.20
  -4  -1  12  157.58   10.80
  -4  -1  12  154.28   17.30
   4  -1 -12  160.68   14.70
   4  -1 -12  143.09   13.30
  -4   1  11   11.80    6.80
   4   1 -11    9.20    8.20
  -4   1  11    1.70    9.60
   4   1 -11    9.80    6.10
   4  -1 -11   14.60    8.30
  -4  -1  11    9.30    5.20
  -4  -1  11   -2.70    9.70
   4  -1 -11   16.60    8.30
  -4   1  10   16.20    9.60
  -4   1  10   10.70    7.00
   4   1 -10   19.10    6.30
   4   1 -10   11.10    8.90
   4   1 -10    4.70    7.50
   4  -1 -10    8.10    7.60
  -4  -1  10   18.20    9.60
   4  -1 -10   12.40    9.20
   4  -1 -10   31.30    8.70
  -4  -1  10   24.30    5.50
   4   1  -9    0.60    4.90
  -4   1   9   11.70    6.70
  -4   1   9    8.80    6.10
   4   1  -9    3.10    7.20
   4   1  -9   -2.50    6.90
  -4   1   9    6.10    7.90
  -4  -1   9    0.90    4.10
  -4  -1   9   -8.60    6.90
   4  -1  -9    8.10    7.00
   4  -1  -9    1.90    8.10
   4  -1  -9    5.30    7.10
  -4   1   8  676.43   24.10
   4   1  -8  671.03   25.50
  -4   1   8  696.13   24.90
   4   1  -8  684.23   24.80
   4   1  -8  596.24   20.60
  -4   1   8  635.64   24.20
  -4  -1   8  656.93   24.70
  -4  -1   8  670.33   20.30
   4  -1  -8  655.83   25.10
   4  -1  -8  669.43   25.90
  -4  -1   8  691.03   25.20
   4  -1  -8  659.93   24.50
   4   1  -7  119.49   10.20
  -4   1   7  144.89   10.90
   4   1  -7  113.69    8.10
   4   1  -7  112.19   10.50
  -4   1   7  128.29   10.10
  -4   1   7  120.49   10.80
   4  -1  -7  113.89   10.90
   4  -1  -7  135.29   11.00
  -4  -1   7  115.09   10.20
  -4  -1   7  144.19   11.50
   4  -1  -7  104.59    9.90
  -4  -1   7  116.89    7.00
  -4   1   6 1794.72   48.80
  -4   1   6 1725.93   49.70
   4   1  -6 1795.52   47.60
  -4   1   6 1698.63   46.90
   4   1  -6 1734.43   45.90
   4   1  -6 1833.72   50.69
  -4  -1   6 1693.63   47.40
   4  -1  -6 1742.53   49.99
  -4  -1   6 1767.32   49.99
   4  -1  -6 1809.42   49.10
   4  -1  -6 1646.24   48.60
   4   1  -5  295.87   15.10
   4   1  -5  293.07   12.50
  -4   1   5  286.87   11.80
   4   1  -5  280.77   10.90
  -4   1   5  299.27   13.80
   4   1  -5  295.27   11.50
  -4  -1   5  285.17   12.50
  -4  -1   5  282.77   14.30
   4  -1  -5  261.57   13.90
   4  -1  -5  301.77   15.10
   4  -1  -5  327.37   13.60
  -4  -1   5  307.77   10.90
   4   1  -4 1189.98   31.90
   4   1  -4 1178.78   32.10
  -4   1   4 1172.08   32.70
  -4   1   4 1166.38   30.80
   4   1  -4 1231.58   32.20
   4   1  -4 1188.78   35.60
   4  -1  -4 1155.98   34.30
   4  -1  -4 1156.18   35.50
   4  -1  -4 1184.08   32.90
   4   1  -3    0.80    4.00
   4   1  -3   -2.10    3.90
   4   1  -3    2.10    2.60
  -4   1   3    4.70    3.70
  -4   1   3    2.00    2.80
   4   1  -3    5.30    3.30
   4   1  -3    1.80    5.80
  -4   1   3   -5.30    3.10
   4  -1  -3    3.50    3.90
  -4  -1   3    0.40    4.00
  -4  -1   3    0.80    2.70
   4  -1  -3    2.80    6.10
   4  -1  -3   -2.00    4.50
  -4   1   2    2.30    3.10
  -4   1   2    4.20    1.80
  -4   1   2    5.70    3.80
   4   1  -2    9.80    5.90
  -4   1   2    3.30    4.30
   4   1  -2    7.10    2.50
   4   1  -2    9.70    4.70
  -4  -1   2    6.60    4.90
  -4  -1   2    5.30    5.10
   4  -1  -2    9.80    5.90
  -4  -1   2    6.50    2.20
   4  -1  -2    7.60    4.60
   4  -1  -2    7.20    3.30
   4  -1  -2    6.20    5.60
   4   1  -1   16.70    5.80
  -4   1   1    4.30    5.20
  -4   1   1   -0.90    5.00
  -4   1   1    7.40    3.00
  -4   1   1   17.50    3.70
   4   1  -1    9.10    5.20
  -4   1   1    7.80    5.80
   4  -1  -1   12.30    5.60
   4  -1  -1   11.40    5.00
  -4  -1   1    4.20    5.00
  -4  -1   1   10.50    3.30
   4  -1  -1    7.10    2.90
  -4  -1   1   13.60    5.50
   4  -1  -1    3.60    5.00
  -4   1   0 5655.33  138.99
   4   1   0 5638.84  139.49
  -4   1   0 5561.84  134.49
  -4   1   0 5555.14  139.59
  -4   1   0 5596.64  137.99
   4   1   0 5521.75  138.59
  -4  -1   0 5513.05  138.59
   4  -1   0 5600.54  134.49
  -4  -1   0 5537.35  137.49
   4  -1   0 5561.64  138.99
   4  -1   0 5484.55  139.39
   4  -1   0 5565.94  139.59
  -4  -1   0 5460.55  139.39
  -4   1  -1  935.41   30.30
  -4   1  -1 1000.60   28.90
   4   1   1 1009.10   30.90
   4   1   1  993.80   28.30
  -4   1  -1 1000.20   28.30
  -4  -1  -1 1018.50   29.00
   4  -1   1  944.11   30.10
   4  -1   1  997.20   29.10
  -4  -1  -1  974.70   30.70
   4  -1   1  969.00   30.10
   4  -1   1 1000.90   28.40
  -4  -1  -1  990.60   28.30
  -4   1  -2 2843.62   76.69
   4   1   2 2901.21   73.49
  -4   1  -2 2724.33   74.19
  -4   1  -2 2925.91   74.09
   4   1   2 3046.70   77.49
   4  -1   2 2917.41   74.19
   4  -1   2 2921.01   74.49
  -4  -1  -2 2907.01   77.09
  -4   1  -3 1369.56   41.10
  -4   1  -3 1406.26   40.50
   4   1   3 1377.26   41.50
   4   1   3 1395.16   36.50
  -4   1  -3 1374.76   37.30
   4  -1   3 1360.56   40.70
   4  -1   3 1340.27   40.00
   4  -1   3 1411.96   37.50
  -4  -1  -3 1390.06   41.60
  -4   1  -4   50.49    5.00
   4   1   4   41.90    8.30
  -4   1  -4   38.80    7.80
   4   1   4   35.00    7.50
  -4   1  -4   61.59    8.80
   4   1   4   51.69    4.10
   4  -1   4   42.60    8.80
   4  -1   4   48.10    7.90
  -4  -1  -4   37.50    8.50
  -4   1  -5  297.97   10.60
  -4   1  -5  294.87   17.50
  -4   1  -5  293.27   17.00
   4   1   5  320.47   18.40
  -4  -1  -5  287.37   17.30
   4  -1   5  331.47   16.70
   4  -1   5  277.47   17.50
  -4   1  -6 1555.64   48.40
   4   1   6 1549.84   49.70
   4   1   6 1571.74   50.89
   4  -1   6 1565.44   49.70
  -4  -1  -6 1615.64   49.60
   4  -1   6 1659.43   48.30
   4   1   7  192.28   17.70
  -4   1  -7  188.88   15.70
   4  -1   7  212.48   18.40
  -4  -1  -7  155.58   15.50
  -4   1  -8  416.36   22.80
   4   1   8  424.76   25.50
  -4  -1  -8  399.26   23.60
   4  -1   8  430.66   25.80
   4   1   9  114.39   15.90
  -4   1  -9   81.29   12.90
  -4  -1  -9   99.59   14.40
   4  -1   9   86.39   15.10
   4   1  10   42.40   13.40
  -4   1 -10   29.20   10.70
   4  -1  10   11.90   12.20
  -4  -1 -10   21.70   10.60
   4   1  11   -1.10   12.50
  -4   1 -11   -7.90    9.30
   4  -1  11    6.50   13.10
  -4  -1 -11  -11.50    9.60
  -4   1 -12   61.49   13.50
   4   1  12   26.20   15.10
   4  -1  12   56.49   16.60
  -4  -1 -12   52.49   13.90
  -4   2  15    3.80   13.30
   4  -2 -15    9.90   10.70
  -4  -2  15   30.30   14.80
  -4   2  14   41.90   14.40
   4   2 -14   52.49    7.20
   4   2 -14   47.70   11.00
   4  -2 -14   63.89   13.50
  -4  -2  14   32.80   14.50
   4   2 -13   -1.20    4.90
  -4   2  13   11.80   11.50
   4   2 -13    1.80    7.80
   4  -2 -13    3.00    9.20
  -4  -2  13   -8.30   11.00
   4  -2 -13    1.60    8.10
   4   2 -12   36.50    9.70
  -4   2  12   25.20    8.10
   4   2 -12   34.50    5.80
  -4   2  12   28.40   11.90
   4  -2 -12   27.70   10.10
  -4  -2  12   50.49   12.80
   4  -2 -12   16.00    8.70
  -4   2  11  259.07   20.40
   4   2 -11  219.38   17.00
  -4   2  11  202.18   15.20
   4   2 -11  214.68   10.70
  -4  -2  11  203.48   18.20
   4  -2 -11  222.68   18.20
   4  -2 -11  194.48   15.60
  -4   2  10  349.17   21.10
   4   2 -10  304.67   19.10
   4   2 -10  300.77   12.00
  -4   2  10  324.77   17.80
   4  -2 -10  324.77   19.70
   4  -2 -10  320.17   19.80
  -4  -2  10  312.17   21.20
   4   2  -9   39.90    9.40
  -4   2   9   33.90    9.60
  -4   2   9   38.80    8.00
   4   2  -9   72.19   10.30
   4   2  -9   46.00    5.00
   4  -2  -9   45.40    9.80
   4  -2  -9   55.79   11.30
  -4  -2   9   36.80   10.10
   4  -2  -9   42.40    9.50
  -4   2   8  389.26   19.00
   4   2  -8  435.46   13.00
   4   2  -8  436.46   19.70
  -4   2   8  395.36   19.40
   4   2  -8  430.76   13.20
   4   2  -8  414.86   20.50
  -4   2   8  444.86   20.20
   4  -2  -8  441.96   21.50
   4  -2  -8  393.96   19.90
   4  -2  -8  443.86   20.80
  -4  -2   8  428.66   20.30
   4   2  -7   44.60    7.90
  -4   2   7   37.30    7.40
   4   2  -7   48.50    8.60
  -4   2   7   32.80    7.20
  -4   2   7   47.50    8.30
   4   2  -7   56.49    4.10
   4   2  -7   49.50    4.10
   4  -2  -7   41.70    8.60
  -4  -2   7   40.80    8.00
   4  -2  -7   27.70    7.80
   4  -2  -7   38.30    8.30
   4   2  -6  294.57   10.10
   4   2  -6  296.67   10.30
  -4   2   6  321.17   15.90
   4   2  -6  310.27   17.00
  -4   2   6  353.36   16.90
   4   2  -6  330.57   15.10
   4  -2  -6  327.07   17.20
   4  -2  -6  270.97   15.90
  -4  -2   6  327.57   15.60
   4  -2  -6  326.37   16.40
   4   2  -5  112.89    9.30
  -4   2   5  104.29    9.30
   4   2  -5   97.89   10.50
   4   2  -5   87.39    6.20
  -4   2   5  127.89   10.70
  -4   2   5  122.89   10.40
   4   2  -5  102.59    6.40
   4   2  -5  118.49    9.10
   4  -2  -5  110.49   10.80
   4  -2  -5  108.49    9.50
   4  -2  -5  100.09    9.60
   4   2  -4 1962.70   52.19
   4   2  -4 2012.80   50.89
   4   2  -4 1909.01   55.29
   4   2  -4 1977.10   52.09
   4   2  -4 1960.50   50.79
  -4   2   4 2042.60   55.49
  -4   2   4 1991.50   53.39
  -4  -2   4 2033.90   50.69
   4  -2  -4 1929.61   55.29
   4  -2  -4 1950.70   54.89
   4  -2  -4 2023.30   53.69
  -4   2   3 2212.88   58.59
   4   2  -3 2096.39   55.29
  -4   2   3 2207.38   57.09
   4   2  -3 2131.39   58.99
   4   2  -3 2075.39   55.39
   4  -2  -3 2130.29   58.59
  -4  -2   3 2159.38   55.29
   4  -2  -3 2166.28   59.09
   4  -2  -3 2158.28   56.59
  -4  -2   3 2131.29   55.39
  -4   2   2 1972.00   53.99
   4   2  -2 1922.71   53.99
   4   2  -2 2069.39   52.29
  -4   2   2 1861.81   51.99
   4   2  -2 1995.50   50.99
  -4  -2   2 2034.50   51.99
   4  -2  -2 1917.11   54.29
   4  -2  -2 1927.91   53.79
   4  -2  -2 1940.01   51.79
  -4  -2   2 1988.20   50.69
   4   2  -1  731.43   24.00
  -4   2   1  722.03   24.00
  -4   2   1  742.13   20.80
  -4   2   1  709.53   22.50
   4   2  -1  745.03   21.80
  -4   2   1  736.43   24.60
   4   2  -1  738.33   23.30
   4  -2  -1  661.13   23.60
  -4  -2   1  724.83   23.30
   4  -2  -1  693.53   23.90
   4  -2  -1  725.73   22.30
  -4  -2   1  712.83   21.60
   4  -2  -1  745.83   24.70
   4   2   0   15.70    5.60
  -4   2   0   14.50    6.10
  -4   2   0   17.60    6.00
  -4   2   0   18.00    5.10
   4   2   0   14.90    5.00
   4   2   0   12.70    5.10
  -4   2   0   26.30    7.00
  -4   2   0   14.40    4.60
  -4  -2   0   20.30    5.30
   4  -2   0   11.80    5.40
   4  -2   0    8.70    4.40
   4  -2   0    6.60    5.60
   4  -2   0   17.20    6.20
  -4  -2   0   12.00    6.20
  -4   2  -1    8.00    5.70
  -4   2  -1    1.70    5.50
   4   2   1    2.20    4.40
  -4   2  -1    4.20    6.20
   4   2   1    1.10    5.00
   4   2   1    5.40    5.70
  -4   2  -1    7.70    5.20
  -4   2  -1   12.90    4.70
   4  -2   1    8.60    4.80
  -4  -2  -1    3.40    4.70
   4  -2   1    9.60    6.00
  -4  -2  -1   -3.30    5.10
   4  -2   1    3.70    5.50
  -4   2  -2 1029.30   31.10
  -4   2  -2  962.50   29.30
   4   2   2  941.31   28.20
   4   2   2 1022.60   31.80
   4  -2   2  948.31   29.40
   4  -2   2  944.51   29.70
   4  -2   2  929.11   30.40
  -4  -2  -2  934.31   31.20
   4  -2   2  998.50   30.50
  -4   2  -3  662.43   24.40
  -4   2  -3  706.93   24.40
   4   2   3  720.03   25.80
  -4   2  -3  712.23   22.70
   4   2   3  662.53   20.90
   4  -2   3  698.83   24.50
   4  -2   3  666.13   24.20
  -4  -2  -3  696.83   25.20
  -4  -2  -3  642.34   25.10
   4  -2   3  676.03   24.50
  -4   2  -4 1401.66   38.90
  -4   2  -4 1399.96   42.20
   4   2   4 1394.16   37.10
  -4   2  -4 1404.06   42.20
   4   2   4 1404.46   43.40
  -4  -2  -4 1396.26   43.70
   4  -2   4 1407.06   41.80
   4  -2   4 1337.37   42.10
  -4  -2  -4 1362.96   43.10
   4  -2   4 1367.16   41.70
  -4   2  -5  737.43   22.60
   4   2   5  686.73   27.60
   4   2   5  713.43   19.90
  -4   2  -5  662.03   26.20
  -4   2  -5  708.73   27.20
  -4  -2  -5  701.33   28.40
   4  -2   5  704.73   25.90
   4  -2   5  710.43   26.30
   4  -2   5  734.83   28.00
  -4  -2  -5  696.63   28.30
   4   2   6  259.97   19.00
  -4   2  -6  228.78   16.30
  -4   2  -6  245.58   11.30
   4  -2   6  203.68   15.10
   4  -2   6  220.78   14.80
  -4  -2  -6  242.28   18.80
   4  -2   6  235.08   18.10
  -4  -2  -6  219.08   17.70
  -4   2  -7    4.40    4.10
   4   2   7   27.80   11.30
  -4   2  -7    8.60    8.30
  -4  -2  -7   -2.30    9.30
   4  -2   7   -7.20    9.20
  -4   2  -8  146.39   14.70
   4   2   8   96.39   15.40
   4  -2   8  121.49   16.70
  -4  -2  -8  121.69   15.20
  -4   2  -9  186.18   16.70
   4   2   9  160.98   19.00
   4  -2   9  169.78   19.50
  -4  -2  -9  173.68   18.50
  -4   2 -10  121.99   15.10
   4   2  10   92.09   16.70
   4  -2  10  107.59   17.80
  -4  -2 -10  129.29   16.90
   4  -2  10   98.99   14.00
  -4   2 -11   75.79   13.70
   4   2  11  107.99   18.80
  -4  -2 -11   81.49   16.10
   4  -2  11   73.99   16.90
   4   2  12    7.70   14.20
  -4   2 -12    6.80   10.20
  -4  -2 -12    7.90   11.80
   4  -2  12    9.10   13.80
   4   3 -14   11.60    9.30
  -4   3  14   21.10   13.20
  -4  -3  14   11.70   13.20
   4  -3 -14   16.30   11.60
   4   3 -13   73.19   12.40
  -4   3  13   88.69   15.90
   4  -3 -13   71.59   12.00
  -4  -3  13  104.79   17.00
   4  -3 -13   98.69   14.90
  -4   3  12    7.90    7.00
   4   3 -12   17.50    9.40
  -4   3  12   15.80   10.90
   4  -3 -12   10.30    9.00
  -4  -3  12    8.40   11.80
   4  -3 -12   22.60   11.00
   4   3 -11   81.49   12.70
  -4   3  11   92.19   14.10
  -4   3  11  105.69   11.60
  -4  -3  11  100.19   14.90
   4  -3 -11   81.19   12.00
   4  -3 -11  103.49   14.20
  -4   3  10    9.90    7.50
  -4   3  10    5.50    9.50
   4   3 -10   22.20    9.60
   4  -3 -10    6.30    9.30
  -4  -3  10    8.10   10.30
   4  -3 -10   11.80    9.10
  -4   3   9   17.10    8.70
  -4   3   9    2.90    7.10
   4   3  -9    8.40    8.70
   4   3  -9   13.70    8.60
  -4  -3   9    3.30    8.80
   4  -3  -9   -2.50    9.80
   4  -3  -9   15.70    9.30
   4  -3  -9   24.40    9.10
   4   3  -8   50.79   10.30
   4   3  -8   55.59    9.70
  -4   3   8   53.09    9.30
  -4  -3   8   60.59   10.50
   4  -3  -8   53.59   10.30
   4  -3  -8   55.29   10.10
   4  -3  -8   58.69   11.20
   4   3  -7 1062.29   36.40
  -4   3   7 1110.09   36.20
  -4   3   7 1098.79   36.80
  -4   3   7 1063.49   36.10
   4   3  -7 1133.59   35.50
   4   3  -7 1079.29   35.10
   4  -3  -7 1058.79   36.50
   4  -3  -7 1093.19   37.10
   4  -3  -7 1015.10   35.70
  -4   3   6  402.36   19.10
  -4   3   6  363.36   18.90
   4   3  -6  408.96   17.50
   4   3  -6  363.46   17.80
   4   3  -6  363.86   19.30
   4  -3  -6  377.16   19.60
   4  -3  -6  355.16   18.90
   4  -3  -6  421.66   19.70
   4   3  -5   51.09    7.30
   4   3  -5   46.20    8.60
   4   3  -5   63.39    4.60
  -4   3   5   65.49    8.90
  -4   3   5   46.60    8.40
   4   3  -5   59.79    8.10
  -4   3   5   75.09    9.20
   4   3  -5   61.59    4.70
   4  -3  -5   59.99    8.80
   4  -3  -5   61.09    9.20
   4  -3  -5   69.09   10.00
  -4   3   4    5.90    6.60
   4   3  -4   17.20    4.00
   4   3  -4   14.10    5.90
   4   3  -4   14.50    5.30
  -4   3   4    6.60    6.10
   4   3  -4   11.10    6.80
  -4   3   4   16.40    7.10
   4  -3  -4   12.50    6.40
   4  -3  -4    6.50    6.80
   4  -3  -4   16.00    7.20
  -4  -3   4   22.50    4.00
  -4   3   3   47.20    8.30
  -4   3   3   56.89    8.20
   4   3  -3   53.79    8.10
  -4   3   3   46.30    7.80
   4   3  -3   45.20    5.80
   4   3  -3   44.50    6.30
   4  -3  -3   46.50    8.70
  -4  -3   3   53.69    6.00
  -4  -3   3   45.00    5.60
   4  -3  -3   43.10    6.90
   4  -3  -3   54.29    8.90
  -4   3   2   15.90    6.00
   4   3  -2   12.10    4.80
  -4   3   2   21.20    7.40
   4   3  -2   16.00    5.50
   4  -3  -2   18.10    5.50
   4  -3  -2   17.60    7.10
  -4  -3   2   19.60    5.20
  -4  -3   2   19.60    4.80
   4  -3  -2   12.50    6.10
  -4   3   1 1679.93   49.90
  -4   3   1 1794.92   49.99
  -4   3   1 1723.43   48.80
   4   3  -1 1769.42   48.50
  -4   3   1 1787.12   46.50
   4   3  -1 1721.53   48.00
   4  -3  -1 1770.32   49.80
  -4  -3   1 1735.53   48.30
  -4  -3   1 1844.32   48.00
   4  -3  -1 1735.53   48.40
   4  -3  -1 1671.23   49.30
   4  -3  -1 1747.73   50.29
  -4   3   0   20.70    6.20
  -4   3   0   12.60    6.30
   4   3   0   17.70    5.90
   4   3   0   13.80    6.00
  -4   3   0   16.70    5.20
  -4   3   0    4.30    6.40
   4  -3   0   16.80    5.40
  -4  -3   0   25.50    6.70
   4  -3   0   14.10    6.50
  -4  -3   0   18.60    5.80
   4  -3   0    1.30    2.40
   4  -3   0   13.90    7.00
   4   3   1 2254.67   61.29
  -4   3  -1 2202.48   60.59
   4   3   1 2238.68   60.19
  -4   3  -1 2255.67   60.89
  -4   3  -1 2071.89   60.49
  -4  -3  -1 2152.68   60.89
   4  -3   1 2210.98   60.29
   4  -3   1 2226.18   60.59
   4  -3   1 2201.78   60.79
  -4   3  -2  545.95   20.90
  -4   3  -2  557.94   22.00
  -4   3  -2  529.05   21.10
   4   3   2  546.65   22.10
   4   3   2  579.64   22.70
  -4   3  -2  528.65   22.00
  -4   3  -2  535.75   20.90
   4  -3   2  547.35   20.70
   4  -3   2  542.95   21.10
  -4  -3  -2  595.84   23.10
  -4  -3  -2  506.55   21.60
   4  -3   2  554.74   21.00
  -4   3  -3  718.73   25.40
  -4   3  -3  699.63   24.20
  -4   3  -3  645.94   26.20
  -4   3  -3  629.74   24.30
   4   3   3  670.43   25.60
   4  -3   3  702.43   25.30
  -4  -3  -3  727.33   26.60
  -4  -3  -3  649.83   26.40
   4  -3   3  672.83   24.40
   4  -3   3  687.23   24.20
   4   3   4    3.30    7.10
  -4   3  -4    1.50    6.60
  -4   3  -4    7.60    5.80
  -4   3  -4   15.50    7.00
   4  -3   4   16.00    7.80
  -4  -3  -4   11.80    8.50
   4  -3   4   22.10    6.70
   4  -3   4    2.80    6.30
  -4  -3  -4    3.80    7.60
   4   3   5  575.94   19.20
  -4   3  -5  582.44   25.30
  -4   3  -5  593.24   23.60
  -4   3  -5  574.04   21.70
   4   3   5  619.24   26.10
   4  -3   5  623.94   23.60
  -4  -3  -5  609.14   26.90
   4  -3   5  607.34   25.70
  -4  -3  -5  590.54   26.80
   4  -3   5  583.94   23.50
   4   3   6  468.45   15.80
   4   3   6  469.85   15.50
  -4   3  -6  460.95   19.00
  -4   3  -6  466.25   21.80
   4  -3   6  468.45   24.00
  -4  -3  -6  472.75   24.80
   4  -3   6  479.45   21.40
   4   3   7  540.35   28.10
  -4   3  -7  543.25   20.50
  -4   3  -7  540.35   24.10
  -4  -3  -7  549.25   27.90
   4  -3   7  497.45   26.90
   4  -3   7  546.95   23.80
   4   3   8   51.69   13.90
  -4   3  -8   51.89    7.20
  -4   3  -8   31.70    9.60
   4  -3   8   49.20   10.00
  -4  -3  -8   39.70   12.70
   4  -3   8   41.80   12.30
  -4   3  -9  106.29   13.30
   4   3   9  104.89   17.80
   4  -3   9  106.19   16.30
   4  -3   9  131.89   13.50
  -4  -3  -9   99.89   16.00
  -4   3 -10    4.80    8.60
   4   3  10   -1.20   11.30
  -4  -3 -10   -0.20   11.60
   4  -3  10    7.70   12.40
   4   3  11   35.80   14.60
  -4   3 -11   42.40   11.50
  -4  -3 -11   30.80   13.60
   4  -3  11   37.70   14.30
  -4   3 -12   -3.90    9.20
   4   3  12   -1.20   12.50
  -4  -3 -12    0.40   12.70
   4  -3  12    5.10   13.30
  -4   4  14    6.00   12.50
   4   4 -14   -1.50    9.90
  -4  -4  14    2.40   13.80
   4  -4 -14   13.50   12.30
   4   4 -13   -4.00   10.10
  -4   4  13   25.00   12.40
   4   4 -13  -18.80    8.40
   4  -4 -13   -2.60    8.70
  -4  -4  13  -19.40   11.80
   4  -4 -13   11.30   11.00
   4   4 -12   17.80   10.10
  -4   4  12   -0.40   10.80
   4   4 -12   23.30   11.40
   4  -4 -12    6.30   10.90
   4  -4 -12   43.00   10.80
  -4  -4  12   14.40   12.20
  -4   4  11   76.49   11.20
   4   4 -11   79.39   13.40
   4   4 -11   63.39   12.20
  -4   4  11   75.19   13.90
  -4  -4  11   60.59   13.70
   4  -4 -11   66.39   13.10
   4  -4 -11   63.79   11.90
  -4   4  10    3.70    7.60
  -4   4  10   -0.60   10.00
   4   4 -10   29.30   10.20
   4   4 -10   25.10   10.50
   4  -4 -10   14.90   10.60
   4  -4 -10    5.90    9.20
   4   4  -9  237.68   18.60
  -4   4   9  220.78   17.70
   4   4  -9  191.38   16.50
   4  -4  -9  188.48   17.30
   4  -4  -9  211.88   17.60
   4   4  -8   57.99   10.30
  -4   4   8   43.50    9.30
   4   4  -8   42.90   10.40
   4   4  -8   43.70   10.30
  -4   4   8   32.90   10.70
   4  -4  -8   27.10    9.90
   4  -4  -8   44.50   11.80
   4  -4  -8   35.40   10.90
   4   4  -7   73.89   11.20
   4   4  -7   46.90   10.50
  -4   4   7   51.79   11.40
   4   4  -7   75.29   10.60
  -4   4   7   66.69   10.60
   4  -4  -7   60.39   11.50
   4  -4  -7   95.39   12.60
   4  -4  -7   49.90   10.50
  -4   4   6   48.80    9.20
   4   4  -6   51.59    8.90
  -4   4   6   37.20    9.60
   4   4  -6   48.00   10.00
   4   4  -6   47.00    9.10
  -4   4   6   45.90    9.10
   4  -4  -6   45.00   10.00
   4  -4  -6   47.40    9.50
   4  -4  -6   27.40    9.10
   4   4  -5  419.76   19.10
  -4   4   5  359.46   20.10
  -4   4   5  406.66   20.20
   4   4  -5  391.06   12.90
   4   4  -5  391.86   18.30
  -4   4   5  385.56   19.90
   4  -4  -5  413.16   20.90
  -4  -4   5  379.26   12.00
   4  -4  -5  402.66   20.80
   4  -4  -5  399.56   20.50
  -4   4   4   -7.60    7.30
  -4   4   4    1.40    6.60
   4   4  -4   10.50    6.20
   4   4  -4    4.50    4.10
  -4   4   4   11.80    7.90
   4  -4  -4    9.30    6.90
  -4  -4   4   10.10    5.50
  -4  -4   4   11.10    4.00
   4  -4  -4    1.60    6.60
   4  -4  -4   17.00    8.30
  -4   4   3 1087.99   35.40
  -4   4   3 1083.69   35.60
   4   4  -3 1109.29   31.10
  -4   4   3 1063.09   35.70
   4   4  -3 1118.99   33.60
   4  -4  -3 1050.49   36.10
   4  -4  -3 1045.70   34.90
  -4  -4   3  884.81   31.90
   4  -4  -3 1124.99   34.60
  -4  -4   3 1088.99   31.00
   4   4  -2   61.09    7.60
   4   4  -2   52.39    8.40
  -4   4   2   62.49    9.60
  -4   4   2   75.59   10.20
   4  -4  -2   53.29   10.10
   4  -4  -2   63.79    9.30
  -4  -4   2   57.19    7.30
   4  -4  -2   71.59    9.00
  -4   4   1 1057.09   34.40
   4   4  -1 1056.79   32.10
   4   4  -1 1024.90   33.20
  -4   4   1 1059.19   34.70
  -4   4   1 1002.40   33.80
   4  -4  -1 1008.40   34.90
   4  -4  -1 1020.70   33.80
  -4  -4   1 1002.90   31.90
  -4  -4   1 1009.80   32.40
   4  -4  -1 1104.19   33.70
  -4   4   0   38.20    7.20
   4   4   0   35.20    7.90
  -4   4   0   36.50    8.00
  -4   4   0   37.70    7.90
  -4   4   0   16.70    7.20
   4   4   0   26.80    7.00
   4  -4   0   31.30    7.60
   4  -4   0   38.20    8.30
   4  -4   0   23.60    5.30
  -4  -4   0   21.20    7.40
  -4  -4   0   23.70    7.30
   4  -4   0   39.40    8.80
  -4   4  -1    6.60    6.70
   4   4   1    6.80    6.40
  -4   4  -1    9.90    6.80
  -4   4  -1    8.20    6.60
   4   4   1    6.80    7.30
  -4   4  -1    8.40    6.00
  -4  -4  -1    8.10    7.10
   4  -4   1   -0.40    6.20
  -4  -4  -1    9.80    7.10
   4  -4   1    8.40    5.70
   4  -4   1   14.50    6.90
   4   4   2   48.30    8.80
  -4   4  -2   60.99    9.20
  -4   4  -2   56.49    9.00
  -4   4  -2   64.39    9.50
  -4   4  -2   41.20    8.70
   4   4   2   39.60    9.00
  -4  -4  -2   41.50    9.20
   4  -4   2   48.70    8.40
   4  -4   2   44.70    7.60
  -4  -4  -2   47.80    9.50
  -4   4  -3 1053.29   36.30
  -4   4  -3 1006.90   33.80
  -4   4  -3  962.70   33.80
   4   4   3 1073.19   36.20
   4   4   3 1048.30   35.90
  -4   4  -3 1000.20   34.20
  -4  -4  -3 1066.09   36.90
  -4  -4  -3 1007.30   35.80
   4  -4   3 1003.20   34.30
   4  -4   3 1012.40   33.50
   4  -4   3 1110.99   34.00
  -4   4  -4   10.80    8.50
  -4   4  -4   18.20    8.00
   4   4   4    5.30    7.80
  -4   4  -4   16.00    7.60
  -4  -4  -4   15.90    9.70
   4  -4   4   10.40    8.40
   4  -4   4    6.70    6.30
   4  -4   4   11.20    7.20
  -4  -4  -4    0.90    7.70
  -4   4  -5 1149.08   42.00
  -4   4  -5 1227.08   38.00
  -4   4  -5 1088.49   37.40
   4  -4   5 1178.78   37.70
  -4  -4  -5 1150.88   41.60
   4  -4   5 1193.28   37.80
   4  -4   5 1187.58   40.50
  -4   4  -6   54.79    9.00
  -4   4  -6   58.29    9.90
   4   4   6   61.09    7.40
  -4   4  -6   28.80   11.10
   4  -4   6   80.89   10.70
  -4  -4  -6   43.80   12.00
   4  -4   6   69.19   13.20
  -4   4  -7    5.80    7.90
  -4   4  -7   -7.40   10.50
   4   4   7   -3.00    4.50
  -4   4  -7    3.10    7.00
   4   4   7    8.00    5.20
   4  -4   7    0.20    7.20
  -4  -4  -7    0.00   11.20
   4  -4   7   22.80   10.90
   4   4   8    2.60    4.20
   4   4   8    9.70    3.90
  -4   4  -8    8.80    8.40
  -4   4  -8    5.20    6.70
  -4  -4  -8   21.90   12.00
   4  -4   8    4.40    7.90
   4  -4   8    6.70   10.80
   4   4   9  222.78   22.10
  -4   4  -9  233.08   17.40
  -4  -4  -9  236.38   22.70
   4  -4   9  178.58   20.10
  -4   4 -10   -0.20    8.80
   4   4  10   -5.50   12.20
   4  -4  10   13.20   12.70
  -4  -4 -10   11.40   12.90
   4   4  11  111.79   19.60
  -4   4 -11   82.79   12.80
  -4  -4 -11   64.99   16.50
   4  -4  11  121.99   20.00
  -4   5  14   15.70   12.90
   4   5 -14    3.60   10.30
   4   5 -13   58.39   14.40
  -4   5  13   61.29   15.90
   4   5 -13   48.60   12.90
   4  -5 -13   77.79   16.10
  -4   5  12    0.10   11.30
   4   5 -12   -1.40    9.50
   4   5 -12    8.90   10.80
   4  -5 -12   -1.70    9.40
   4  -5 -12   11.90   11.70
  -4   5  11   47.20   13.40
   4   5 -11   43.70   11.30
   4   5 -11   37.00   12.30
   4  -5 -11   17.10   10.20
   4  -5 -11   38.20   13.00
   4   5 -10   70.69   13.00
   4   5 -10   83.89   14.10
   4  -5 -10   82.29   13.00
   4  -5 -10  108.99   16.10
   4   5  -9    3.40    9.80
  -4   5   9   13.70   12.20
   4   5  -9   21.00   10.30
   4  -5  -9   16.70   11.60
   4  -5  -9   32.70   11.00
   4   5  -8   12.00    9.50
   4   5  -8   -1.50    8.80
  -4   5   8    8.50    9.20
  -4   5   8    3.00   11.00
   4  -5  -8    5.20   10.40
   4  -5  -8  -14.00    9.10
  -4   5   7  195.78   16.60
  -4   5   7  159.98   16.30
   4   5  -7  217.78   17.10
   4   5  -7  180.08   17.20
   4  -5  -7  147.19   15.90
   4  -5  -7  169.18   16.70
  -4   5   6   11.40   10.10
   4   5  -6   11.60    3.60
   4   5  -6   20.20    8.40
   4   5  -6   20.10    8.10
  -4   5   6   15.20    8.90
   4  -5  -6   10.60    9.50
   4  -5  -6    6.60    9.20
   4  -5  -6   15.10    9.70
  -4   5   5  194.98   16.30
   4   5  -5  178.28    9.60
   4   5  -5  167.58   14.00
  -4   5   5  213.98   17.20
   4   5  -5  207.08   16.20
  -4   5   5  211.28   17.20
   4  -5  -5  220.98   17.70
   4  -5  -5  187.78   16.70
  -4  -5   5  193.68    8.90
   4  -5  -5  162.48   15.40
  -4   5   4   42.10   10.50
  -4   5   4   26.20    9.60
  -4   5   4   39.20    9.90
   4   5  -4   19.70    5.40
   4   5  -4   17.00    7.90
  -4  -5   4   26.50    5.30
   4  -5  -4   17.30    9.70
   4  -5  -4   25.50    8.40
   4  -5  -4   23.60    9.40
  -4  -5   4   16.00    6.90
  -4   5   3  160.98   15.20
  -4   5   3  199.28   16.00
   4   5  -3  157.28   13.10
  -4   5   3  188.68   15.40
   4   5  -3  195.78   11.70
   4  -5  -3  203.78   15.60
   4  -5  -3  166.08   14.80
  -4  -5   3  149.79   10.80
  -4  -5   3  202.68   14.20
   4  -5  -3  188.88   15.60
   4   5  -2   34.70    8.60
  -4   5   2   22.70    8.30
   4   5  -2   24.50    6.50
  -4   5   2   15.70    8.60
   4  -5  -2    9.00    7.70
  -4  -5   2   28.50    7.40
  -4  -5   2   19.10    6.30
   4  -5  -2   10.70    7.10
   4  -5  -2   34.30   10.00
  -4   5   1  485.85   23.00
   4   5  -1  488.55   20.30
  -4   5   1  470.45   22.70
  -4   5   1  495.15   22.30
   4   5  -1  488.35   22.70
   4  -5  -1  496.65   22.10
   4  -5  -1  466.15   21.50
  -4  -5   1  489.05   21.40
  -4  -5   1  485.75   20.20
  -4   5   0   41.40    9.50
  -4   5   0   37.80    8.70
  -4   5   0   68.29   10.20
   4   5   0   30.40    7.70
   4   5   0   44.40    9.70
  -4   5   0   39.70    8.00
   4  -5   0   40.80    8.40
  -4  -5   0   36.50    8.20
   4  -5   0   40.80    8.40
  -4  -5   0   39.60    8.50
   4   5   1  644.74   27.10
  -4   5  -1  650.73   27.00
  -4   5  -1  671.03   26.20
  -4   5  -1  673.43   27.90
  -4   5  -1  669.43   25.80
   4   5   1  671.13   26.30
  -4  -5  -1  728.73   27.90
   4  -5   1  681.03   25.50
  -4  -5  -1  690.43   26.60
   4  -5   1  645.34   25.70
   4  -5   1  640.14   26.30
  -4   5  -2   79.39   11.00
   4   5   2   42.20   10.40
   4   5   2   68.89   10.80
  -4   5  -2   55.19    9.90
  -4   5  -2   43.90   10.20
  -4   5  -2   56.69    9.70
   4  -5   2   74.79    9.70
   4  -5   2   50.79    9.10
  -4  -5  -2   59.89   11.30
  -4  -5  -2   44.10    9.90
  -4   5  -3  361.66   20.20
  -4   5  -3  362.06   20.60
  -4   5  -3  355.46   21.80
   4   5   3  392.76   23.00
   4   5   3  383.26   21.20
  -4   5  -3  375.66   19.70
  -4  -5  -3  383.76   22.60
   4  -5   3  365.26   18.20
  -4  -5  -3  400.06   22.10
   4  -5   3  356.36   18.70
   4   5   4   45.20   12.10
   4   5   4   58.89   10.80
  -4   5  -4   75.09   11.00
  -4   5  -4   60.79   12.50
   4  -5   4   80.69   10.20
  -4  -5  -4   62.19   12.20
  -4   5  -5   28.10    9.30
  -4   5  -5   70.09   14.20
   4  -5   5   51.79    9.70
  -4  -5  -5   50.69   12.40
   4   5   6   51.29    8.70
  -4   5  -6   44.00   12.80
  -4   5  -6   61.59   10.60
   4  -5   6   36.00    9.10
   4  -5   6   50.99   12.80
  -4  -5  -6   49.99   13.70
  -4   5  -7  669.93   33.20
   4   5   7  610.64   23.40
  -4   5  -7  642.24   26.80
   4  -5   7  588.64   25.30
   4  -5   7  607.84   31.40
  -4  -5  -7  635.14   32.50
  -4   5  -8  116.69   17.80
  -4   5  -8  108.19   12.40
  -4  -5  -8  110.49   17.60
   4  -5   8  111.09   17.30
  -4   5  -9  120.19   18.90
   4  -5   9  106.89   18.10
  -4  -5  -9  115.39   18.70
  -4   5 -10   11.60   13.50
   4   5  10   25.70   15.50
   4  -5  10    0.70   12.80
  -4  -5 -10   31.40   14.30
  -4   5 -11   13.30   13.70
   4   5  11   -9.30   14.10
  -4  -5 -11   -7.20   13.00
   4  -5  11  -11.00   13.90
  -4   6  13   35.20   14.50
   4   6 -13   -4.90   10.40
   4   6 -13   12.60   13.50
   4  -6 -13   -6.30   12.60
   4   6 -12   15.40   11.10
  -4   6  12  -22.60   12.30
   4   6 -12   30.60   12.80
   4  -6 -12  -10.60   11.60
   4   6 -11   10.70   10.60
   4   6 -11   19.30   11.70
   4  -6 -11   16.40   12.50
   4   6 -10   -8.80    9.30
   4   6 -10    1.50    9.90
   4  -6 -10   -6.70   11.10
  -4   6   9  135.19   17.70
   4   6  -9  148.89   17.40
   4   6  -9  160.08   17.10
   4  -6  -9  149.88   18.10
   4   6  -8    8.20   10.60
   4   6  -8   -5.70    9.10
  -4   6   8   13.20   12.10
   4  -6  -8    5.30   11.60
   4   6  -7   23.30   10.40
  -4   6   7   53.99   14.30
   4  -6  -7   53.49   12.40
   4   6  -6   57.59    6.10
  -4   6   6   63.49   13.70
   4   6  -6   55.89   11.60
  -4  -6   6   58.79    4.50
   4  -6  -6   37.60   12.70
  -4   6   5  147.09   16.50
   4   6  -5  141.69   14.40
   4   6  -5  137.79   10.20
  -4  -6   5  163.48   14.70
   4  -6  -5  132.29   14.80
  -4  -6   5  134.69    9.30
   4   6  -4  183.68   12.10
   4   6  -4  145.39   14.40
  -4   6   4  156.08   16.50
  -4   6   4  152.68   15.10
   4  -6  -4  150.38   14.80
  -4  -6   4  139.19   10.60
  -4  -6   4  172.48   14.60
   4  -6  -4  159.68   16.60
  -4   6   3   63.29   12.00
  -4   6   3   34.60   11.60
   4   6  -3   53.39    8.10
   4   6  -3   52.79   11.10
   4  -6  -3   60.29   11.10
  -4  -6   3   68.19    8.30
   4  -6  -3   44.50   10.20
  -4  -6   3   48.50    9.70
  -4   6   2  454.25   23.20
   4   6  -2  477.85   24.70
  -4   6   2  452.05   25.80
   4   6  -2  441.56   20.00
  -4  -6   2  525.65   22.80
  -4  -6   2  399.66   19.30
   4  -6  -2  433.46   23.20
   4  -6  -2  450.65   22.60
  -4   6   1  214.38   17.70
   4   6  -1  230.48   15.50
   4   6  -1  176.18   16.00
  -4   6   1  239.08   18.90
  -4  -6   1  241.78   16.80
   4  -6  -1  212.78   17.30
   4  -6  -1  208.38   16.90
  -4  -6   1  226.48   14.90
   4   6   0  104.69   13.50
   4   6   0  119.69   12.70
  -4   6   0  114.49   13.10
  -4   6   0  136.29   13.40
  -4   6   0  124.69   14.50
  -4   6   0  108.29   14.20
  -4  -6   0   95.19   12.20
   4  -6   0  142.89   13.50
  -4  -6   0   94.99   11.90
   4  -6   0  130.69   13.90
  -4   6  -1   -2.30    7.10
  -4   6  -1    4.30    8.80
   4   6   1   -0.50    9.80
   4   6   1    1.00    7.80
  -4   6  -1   -4.80    7.40
  -4   6  -1    0.50    9.10
  -4  -6  -1   -6.20    7.60
   4  -6   1    2.90    7.70
  -4  -6  -1    2.60    8.00
  -4   6  -2   31.70    9.30
   4   6   2   27.80    9.50
   4   6   2   48.10   12.20
  -4   6  -2   29.80   10.00
  -4   6  -2   51.69   12.50
  -4   6  -2   40.20    9.80
  -4  -6  -2   50.39   11.30
  -4  -6  -2   51.79   11.50
   4  -6   2   28.80    8.90
   4   6   3  258.27   18.30
   4   6   3  286.57   23.40
  -4   6  -3  227.28   19.30
  -4   6  -3  287.97   18.60
   4  -6   3  271.07   17.60
  -4  -6  -3  288.07   20.80
   4   6   4  230.78   19.90
  -4   6  -4  214.58   17.10
  -4   6  -4  263.37   21.40
   4  -6   4  233.98   17.00
  -4  -6  -4  209.38   19.40
   4   6   5  136.39   17.90
  -4   6  -5  101.39   16.50
   4  -6   5  103.69   12.10
  -4  -6  -5  108.99   16.70
  -4   6  -6  124.69   17.50
   4   6   6  133.89   13.20
   4  -6   6  101.29   11.80
  -4  -6  -6   86.89   15.70
  -4   6  -7   16.30   12.30
  -4  -6  -7   23.80   12.90
  -4   6  -8    9.10   13.70
  -4  -6  -8   17.70   13.40
  -4   6  -9   50.89   15.90
   4  -6   9   63.19   16.70
  -4  -6  -9   57.99   16.00
  -4   6 -10   38.90   15.90
  -4  -6 -10   28.30   16.20
   4  -6  10    4.70   14.10
   4   7 -12    0.90   12.40
   4   7 -12   12.20   11.40
   4  -7 -12    1.20   13.10
   4   7 -11   50.49   13.60
   4   7 -11   58.39   14.90
   4  -7 -11   69.59   16.80
   4   7 -10   -1.90   11.00
   4   7 -10   12.50   11.30
  -4   7  10   14.10   14.20
   4  -7 -10  -13.80   10.90
   4   7  -9    5.10   10.90
  -4   7   9   33.70   15.00
   4   7  -9   27.40   12.00
   4  -7  -9    3.40   12.80
  -4   7   8   62.29   15.60
   4   7  -8   69.19   13.90
   4  -7  -8   33.60   12.70
   4   7  -7   25.40    4.60
   4   7  -7   15.60   11.20
  -4   7   7   21.50   13.30
   4  -7  -7   38.10   13.40
  -4   7   6  217.48   21.50
   4   7  -6  244.28   19.90
   4   7  -6  227.68   12.40
   4  -7  -6  214.18   20.60
  -4  -7   6  215.18   10.30
   4   7  -5   22.20   11.50
   4   7  -5   26.60    7.00
  -4   7   5    3.20   12.90
  -4  -7   5   26.10    6.20
   4  -7  -5   32.80   12.50
   4   7  -4   20.10   11.50
  -4   7   4   29.30   14.10
   4   7  -4   30.80    7.50
  -4  -7   4   36.20    7.40
   4  -7  -4   34.20   11.80
  -4   7   3    6.90   10.30
   4   7  -3    0.70   10.40
  -4   7   3   16.60   13.10
   4   7  -3   18.00    7.60
  -4  -7   3   15.30    7.30
   4  -7  -3   36.80   11.70
  -4   7   2   32.20   10.50
   4   7  -2   32.50   12.30
  -4   7   2   37.80   13.50
   4   7  -2   11.60    7.90
  -4  -7   2   26.90    8.20
   4  -7  -2   33.40   11.50
   4   7  -1   79.09   11.20
   4   7  -1   86.29   14.60
  -4   7   1   62.79   13.90
  -4   7   1   77.59   12.70
  -4  -7   1   83.69   11.70
   4  -7  -1   93.19   13.70
   4   7   0  230.48   19.70
  -4   7   0  213.38   19.10
   4   7   0  214.58   17.30
  -4   7   0  276.97   19.70
  -4  -7   0  199.48   17.00
   4  -7   0  225.48   18.50
   4   7   1   16.30   12.10
  -4   7  -1   19.20    9.70
  -4   7  -1   22.90   12.10
   4   7   1   20.70    9.70
   4  -7   1   23.50    9.70
  -4  -7  -1   32.60   10.60
  -4   7  -2   65.59   11.60
   4   7   2   61.59   12.80
   4   7   2   68.99   14.20
  -4   7  -2   63.99   14.50
   4  -7   2   78.09   12.00
  -4  -7  -2   49.20   12.40
  -4   7  -3   18.10   13.00
  -4   7  -3   16.30    9.50
   4   7   3    7.60   12.70
  -4  -7  -3   12.60   11.80
   4  -7   3   21.40    9.30
  -4   7  -4    3.40    8.80
   4   7   4   14.90   12.60
  -4   7  -4    6.60   12.00
  -4  -7  -4    6.40   10.00
   4  -7   4   10.60    8.50
   4   7   5    5.50   12.70
  -4   7  -5   12.70   11.90
   4  -7   5   -1.60    7.80
  -4  -7  -5   -2.50   10.50
  -4   7  -6  104.89   18.00
   4   7   6   87.99   17.40
  -4  -7  -6   91.79   17.70
  -4   7  -7   66.29   16.60
  -4  -7  -7   56.69   15.90
  -4   7  -8   50.49   15.80
  -4  -7  -8   73.59   17.40
  -4   7  -9   -3.10   13.90
  -4  -7  -9   22.90   15.50
   4   8 -11   21.30   12.40
   4   8 -11  -12.90   11.90
   4  -8 -11    9.30   13.80
   4   8 -10   27.50   14.10
   4   8 -10   48.10   14.50
  -4   8  10   29.50   16.20
   4  -8 -10   42.20   15.50
   4   8  -9   26.60   13.30
  -4   8   9   12.80   14.80
   4  -8  -9   -6.70   12.50
   4   8  -8   13.40   12.40
  -4   8   8   21.60   14.90
   4  -8  -8   16.00   12.70
   4   8  -7   -9.70   10.70
  -4   8   7    2.70   14.00
   4  -8  -7    9.50   11.60
  -4   8   6    8.60   13.60
   4   8  -6    1.90   10.90
   4  -8  -6   -0.90   11.60
  -4   8   5  -27.50   12.70
   4   8  -5    3.30    6.30
   4   8  -5  -15.60   10.90
   4  -8  -5   11.10   12.30
  -4  -8   5    0.70    5.60
   4   8  -4   62.39   14.70
   4   8  -4   49.00    9.50
  -4   8   4   34.00   14.80
   4  -8  -4   46.90   12.50
  -4  -8   4   47.30    8.60
   4   8  -3    4.40   12.30
  -4   8   3   -7.60   13.20
   4   8  -3   -0.70    7.50
  -4  -8   3   13.60    7.50
   4  -8  -3   -8.60   10.30
  -4   8   2  124.59   16.70
   4   8  -2   84.39   16.30
   4   8  -2  112.09   12.90
  -4   8   2  113.89   17.80
   4  -8  -2  128.29   16.50
  -4  -8   2  134.29   13.50
   4   8  -1   35.50   10.30
  -4   8   1   40.80   14.50
   4   8  -1    9.30   13.40
  -4   8   1   20.40   11.20
   4  -8  -1   37.80   11.40
  -4  -8   1   30.30   10.10
  -4   8   0    9.90   10.10
   4   8   0    1.30   12.60
  -4   8   0    7.20   12.80
   4   8   0   -3.90    8.70
   4  -8   0   12.40   10.50
  -4  -8   0   -0.10    9.20
   4   8   1   29.30   10.90
  -4   8  -1   19.30   10.20
   4   8   1   37.20   13.80
  -4   8  -1   33.30   14.00
  -4  -8  -1   31.90   11.80
   4  -8   1   26.90   10.50
  -4   8  -2  124.39   18.70
  -4   8  -2  121.79   14.90
   4   8   2   94.29   16.30
  -4  -8  -2  106.39   15.60
   4  -8   2  103.19   14.00
  -4   8  -3   20.40    9.70
  -4   8  -3    7.90   12.50
   4   8   3   13.70   13.20
   4  -8   3   42.70   10.30
  -4  -8  -3   28.40   12.20
  -4   8  -4   82.89   16.50
   4   8   4   55.79   16.00
   4  -8   4   83.19   12.50
  -4  -8  -4   65.79   14.20
   4   8   5   24.30   14.70
  -4   8  -5   22.40   14.70
  -4  -8  -5   15.30   12.30
   4   8   6  170.28   21.90
  -4   8  -6   88.39   18.20
  -4  -8  -6  102.49   19.20
  -4   8  -7   13.10   15.00
  -4  -8  -7   27.50   14.00
  -4   8  -8  -13.10   14.50
  -4  -8  -8   13.80   14.50
   4   9  -9    7.90   14.30
  -4   9   9   23.60   16.30
   4  -9  -9   -7.10   13.10
  -4   9   8   35.90   17.10
   4   9  -8   23.50   14.00
   4  -9  -8   15.80   13.50
  -4   9   7   31.40   16.50
   4   9  -7   12.40   13.30
   4  -9  -7    2.50   13.60
  -4   9   6   77.69   18.40
   4   9  -6   81.69   16.60
   4  -9  -6   58.99   16.10
  -4   9   5   -3.70   14.50
   4   9  -5   -7.20   13.00
   4  -9  -5   14.60   13.30
   4   9  -4    3.30   13.10
  -4   9   4  -13.40   13.80
   4  -9  -4  -13.60   11.20
   4   9  -3   15.70   14.50
  -4   9   3   18.60   15.90
   4  -9  -3   19.20   12.20
  -4  -9   3   12.30    8.90
   4   9  -2   19.90   14.00
  -4   9   2   21.20   15.30
  -4  -9   2   16.10    9.20
   4  -9  -2   19.90   12.20
   4   9  -1   28.20   14.00
  -4   9   1   18.10   14.90
  -4  -9   1   43.30   11.20
   4  -9  -1   54.59   13.30
   4   9   0   37.10   15.70
   4   9   0   43.80   11.80
  -4   9   0   50.79   16.00
  -4   9   0   40.60   12.80
   4  -9   0   54.19   13.20
  -4  -9   0   61.69   12.90
   4   9   1   16.10   10.60
   4   9   1   -9.50   13.20
  -4   9  -1   14.20   14.00
   4  -9   1    7.30    9.90
  -4  -9  -1   26.00   12.10
   4   9   2   54.99   15.90
  -4   9  -2   40.50   15.70
  -4  -9  -2   13.70   12.10
   4  -9   2   26.50   11.00
   4   9   3   -1.50   13.40
  -4   9  -3   17.90   14.40
  -4  -9  -3    6.40   12.50
  -4   9  -4    5.50   14.20
   4   9   4   -4.10   14.20
  -4  -9  -4  -12.60   11.00
  -4   9  -5   17.30   15.30
   4   9   5    6.00   14.30
  -4  -9  -5  -11.40   11.90
   4   9   6   60.39   17.90
  -4   9  -6   16.80   16.00
  -4  -9  -6   34.60   15.60
  -4   9  -7   -3.10   15.20
   4   9   7    3.80   15.50
  -4  -9  -7    1.30   14.20
   4  10  -7  -10.20   14.50
  -4  10   7   -6.40   15.90
   4 -10  -7  -23.60   12.30
  -4  10   6   25.00   17.40
   4  10  -6    1.20   14.70
   4 -10  -6   -9.60   12.20
  -4  10   5   39.60   18.50
   4  10  -5   69.09   18.50
   4 -10  -5   57.79   16.10
  -4  10   4   16.30   17.10
   4  10  -4   18.80   16.10
   4 -10  -4   20.90   14.00
  -4  10   3    3.60   16.80
   4  10  -3   15.00   15.70
   4 -10  -3   12.20   13.60
  -4  10   2   19.90   16.80
   4  10  -2    4.10   15.80
   4 -10  -2    0.90   12.20
  -4  10   1   12.50   16.80
   4  10  -1    6.30   14.90
   4 -10  -1   10.00   11.40
  -4  10   0   -7.40   14.80
   4  10   0   -5.60   15.30
  -4 -10   0   -0.90   10.20
   4 -10   0    3.70   11.30
   4  10   1   16.60   15.60
  -4  10  -1  -16.90   14.70
  -4 -10  -1    3.40   11.50
   4  10   2  -12.80   15.30
  -4  10  -2   22.00   15.90
  -4 -10  -2   34.20   13.80
  -4  10  -3  -17.00   14.20
   4  10   3   17.40   15.80
  -4 -10  -3   -5.20   12.60
   4  10   4   49.99   18.10
  -4  10  -4   31.40   17.70
  -4 -10  -4   24.30   14.80
  -4  10  -5    6.20   16.40
   4  10   5   49.00   17.90
  -4 -10  -5   27.40   15.80
  -4  11   4   21.90   19.80
   4  11  -4   47.90   17.90
   4 -11  -4   24.00   14.60
  -4  11   3  -21.50   16.70
   4  11  -3   -7.60   16.30
   4 -11  -3    7.70   13.70
   4  11  -2   -3.10   16.30
  -4  11   2    2.20   17.90
   4 -11  -2    9.80   13.50
   4  11  -1   47.30   18.90
  -4  11   1    8.00   19.40
   4  11   0    2.00   16.40
  -4  11   0  -16.20   17.40
   4  11   1   27.50   18.40
  -4  11  -1    3.30   18.00
  -5   0  15    7.70   12.10
   5   0 -15  -13.00    7.60
  -5   0  14   16.90   12.70
   5   0 -14    8.00    9.10
   5   0 -14    6.70    8.00
  -5   0  13    2.10   10.50
   5   0 -13  -10.50    6.70
   5   0 -13    5.60    8.30
   5   0 -12   23.10    8.30
  -5   0  12   54.39   12.10
   5   0 -12   44.20   10.50
  -5   0  12   43.50    9.20
   5   0 -11    4.60    8.30
  -5   0  11   -2.90    6.60
  -5   0  11   -2.30    9.00
   5   0 -11   -2.20    6.70
   5   0 -10  440.36   22.50
   5   0 -10  458.25   23.10
  -5   0  10  454.75   18.90
   5   0 -10  434.76   19.30
  -5   0  10  421.56   21.90
  -5   0  10  443.06   21.40
   5   0  -9    7.40    6.10
  -5   0   9    9.50    6.60
  -5   0   9    9.20    5.60
   5   0  -9    0.70    7.60
  -5   0   9    5.90    7.30
  -5   0   8  102.79   11.20
   5   0  -8  114.29    9.60
   5   0  -8  137.79   12.80
  -5   0   8  105.59    9.90
  -5   0   8  117.09    9.50
  -5   0   7    6.80    4.80
  -5   0   7    2.90    6.10
   5   0  -7   -2.30    5.20
   5   0  -7    5.70    6.80
   5   0  -7    2.90    5.20
  -5   0   7    3.60    5.20
   5   0  -6 1829.82   53.29
  -5   0   6 1828.02   50.09
   5   0  -6 1853.91   50.39
   5   0  -6 1859.61   48.50
  -5   0   6 1837.42   48.40
  -5   0   6 1878.71   53.39
   5   0  -6 1828.52   49.90
   5   0  -5   -4.00    4.90
  -5   0   5   -1.80    4.40
   5   0  -5    1.90    3.50
   5   0  -5    0.70    5.90
  -5   0   5    3.90    5.80
   5   0  -5   -3.40    3.70
   5   0  -5    4.50    4.70
  -5   0   5    4.50    3.50
   5   0  -4 2433.46   56.69
  -5   0   4 1986.00   60.59
   5   0  -4 2499.25   61.59
   5   0  -4 2292.37   63.39
   5   0  -4 2339.77   61.29
   5   0  -4 2333.17   58.19
  -5   0   4 2310.97   63.19
   5   0  -3    4.30    4.90
  -5   0   3    0.20    1.50
  -5   0   3   -2.00    3.40
  -5   0   3   -4.40    5.10
   5   0  -3    3.20    5.20
   5   0  -3    2.80    6.00
   5   0  -2  311.77   14.80
  -5   0   2  326.47   14.80
   5   0  -2  294.37   14.20
  -5   0   2  271.07   13.90
   5   0  -2  282.87   13.70
   5   0  -1    5.70    5.40
   5   0  -1   -4.50    5.20
  -5   0   1   -1.30    5.70
   5   0  -1    3.90    5.30
  -5   0   1    5.70    5.20
   5   0  -1    0.70    3.10
   5   0   0 5231.08  127.79
  -5   0   0 5227.78  133.19
  -5   0   0 5229.38  131.89
   5   0   0 5231.18  133.09
   5   0   0 5278.87  131.99
  -5   0  -1    1.90    6.10
   5   0   1   -7.10    5.30
   5   0   1   -4.40    4.20
  -5   0  -1   -6.30    4.10
   5   0   1    0.40    4.80
   5   0   2 3119.49   83.59
  -5   0  -2 3001.60   83.39
   5   0   2 3184.18   80.19
  -5   0  -2 3188.28   80.09
   5   0   2 3139.79   80.79
   5   0   3    5.60    6.50
   5   0   3    2.80    5.90
  -5   0  -3    3.20    3.70
   5   0   3    7.50    4.30
  -5   0  -3    8.70    6.90
  -5   0  -4  323.07   11.50
   5   0   4  334.87   17.70
  -5   0  -4  268.27   17.30
   5   0   4  333.07   12.00
  -5   0  -5    2.40    7.70
   5   0   5   -0.70    8.00
   5   0   5    4.90    6.30
  -5   0  -6  112.09   13.20
   5   0   6  107.29   13.80
   5   0   7   -8.50    9.00
  -5   0  -7   -4.80    8.50
   5   0   8  244.98   21.60
  -5   0  -8  277.37   21.20
  -5   0  -9   10.30    9.80
   5   0   9    3.20   11.50
   5   0  10   -4.30   11.90
  -5   0 -10    1.80   10.50
  -5   0 -11    1.90   10.40
   5   0  11   13.10   13.90
   5   0  12   25.00   15.40
  -5   0 -12   12.80   12.00
   5   1 -15   10.00    7.10
  -5   1  15   22.30   12.90
  -5  -1  15   12.00   12.50
   5  -1 -15    2.40    9.50
  -5   1  14   42.20   13.40
   5   1 -14   15.90    9.80
   5   1 -14   22.50    7.50
   5  -1 -14   40.70   10.70
  -5  -1  14   23.40   12.60
   5  -1 -14   27.00   10.00
   5   1 -13   -5.00    5.80
  -5   1  13   -1.00   10.20
   5   1 -13   -2.50    8.20
   5  -1 -13    2.40    8.60
  -5  -1  13   -1.90   10.20
   5  -1 -13  -10.50    7.90
   5   1 -12   11.70    8.70
   5   1 -12   -1.80    5.80
  -5   1  12    3.80    9.50
  -5   1  12    6.60    7.10
   5  -1 -12    7.70    8.40
  -5  -1  12    4.40   10.50
  -5  -1  12   -0.30    4.80
   5  -1 -12   -0.90    7.60
  -5   1  11    9.20    7.60
   5   1 -11   13.40    9.10
  -5   1  11    4.70    9.20
   5   1 -11   13.00    6.20
  -5  -1  11   -2.60    9.20
   5  -1 -11    3.00    8.60
  -5  -1  11    1.50    4.90
   5  -1 -11    2.60    7.80
   5   1 -10  313.17   18.50
   5   1 -10  297.97   14.20
  -5   1  10  309.07   18.50
  -5   1  10  283.77   18.60
   5   1 -10  328.57   19.70
  -5  -1  10  283.97   13.10
   5  -1 -10  313.57   17.80
   5  -1 -10  295.47   19.10
   5  -1 -10  345.27   20.70
  -5  -1  10  299.37   19.30
  -5   1   9   33.30    8.30
  -5   1   9   33.00    7.80
   5   1  -9   35.60    6.30
   5   1  -9   33.50    8.40
   5   1  -9   23.60    9.00
  -5   1   9   36.50    8.80
   5  -1  -9   24.00    8.40
  -5  -1   9   38.80    5.70
  -5  -1   9   33.60    8.80
   5  -1  -9   30.30    8.90
  -5  -1   9   34.50    8.50
   5  -1  -9   59.09   10.10
   5   1  -8  552.34   21.30
   5   1  -8  550.34   23.40
  -5   1   8  493.35   20.70
   5   1  -8  556.84   18.70
  -5   1   8  556.44   21.40
  -5   1   8  518.75   22.50
  -5  -1   8  543.75   17.80
  -5  -1   8  535.55   23.00
   5  -1  -8  536.55   23.30
   5  -1  -8  559.44   22.80
   5  -1  -8  552.44   21.90
  -5  -1   8  501.95   21.00
   5   1  -7   43.00    5.80
   5   1  -7   24.80    6.20
  -5   1   7   32.40    7.00
   5   1  -7   36.10    5.20
  -5   1   7   21.30    6.00
   5   1  -7   26.90    8.20
  -5   1   7   28.80    7.90
   5  -1  -7   33.10    7.20
  -5  -1   7   32.30    6.60
   5  -1  -7   20.60    7.80
   5  -1  -7   26.30    7.20
  -5  -1   7   31.30    5.10
  -5  -1   7   33.30    7.60
  -5   1   6   76.09    9.30
   5   1  -6  110.69    8.70
   5   1  -6   83.99   10.40
   5   1  -6  104.29    8.40
   5   1  -6  111.19    8.10
  -5   1   6  100.19    9.60
  -5   1   6   92.99    7.40
  -5  -1   6  109.09   10.90
  -5  -1   6  100.49    7.40
  -5  -1   6   88.29    8.10
   5  -1  -6   84.79   10.20
   5  -1  -6   96.69    8.60
   5  -1  -6  110.29   10.00
   5   1  -5    6.80    4.80
   5   1  -5   22.40    7.50
  -5   1   5    9.20    5.50
  -5   1   5    5.40    6.10
  -5   1   5   15.20    3.90
   5   1  -5   12.80    4.50
   5   1  -5   11.90    4.50
  -5  -1   5   12.10    6.50
   5  -1  -5   17.20    6.40
   5  -1  -5   14.80    6.70
   5  -1  -5   12.00    5.10
  -5   1   4  908.81   23.50
   5   1  -4  897.51   24.60
   5   1  -4  945.21   25.30
  -5   1   4  934.31   26.00
   5   1  -4  908.81   27.30
  -5   1   4  934.31   29.90
   5   1  -4  920.01   30.50
  -5   1   4  922.21   29.00
   5   1  -4  906.81   27.20
  -5  -1   4  908.61   27.20
  -5  -1   4  944.11   30.10
   5  -1  -4  948.61   30.60
   5  -1  -4  944.31   29.00
   5  -1  -4  930.31   26.20
   5  -1  -4  890.11   29.10
  -5   1   3  713.03   20.10
   5   1  -3  703.23   22.30
   5   1  -3  683.63   22.60
   5   1  -3  691.03   24.70
   5  -1  -3  692.23   23.50
  -5  -1   3  672.63   22.40
   5  -1  -3  747.23   25.20
   5  -1  -3  711.73   19.90
   5  -1  -3  713.93   23.90
   5   1  -2 3636.24   95.79
  -5   1   2 3747.32   95.69
  -5   1   2 3697.03   95.99
   5   1  -2 3672.83   94.69
  -5   1   2 3716.23   91.89
   5  -1  -2 3695.83   96.09
   5  -1  -2 3569.54   95.19
   5  -1  -2 3765.52   95.49
  -5  -1   2 3687.13   94.69
   5  -1  -2 3654.43   91.69
  -5  -1   2 3795.12   95.99
   5   1  -1  400.66   16.80
  -5   1   1  412.56   17.50
  -5   1   1  386.46   16.70
   5   1  -1  390.76   16.40
  -5   1   1  405.06   12.50
  -5   1   1  412.56   17.40
  -5   1   1  398.86   13.60
   5  -1  -1  395.86   16.90
  -5  -1   1  381.46   16.60
   5  -1  -1  411.76   17.00
  -5  -1   1  397.86   16.60
  -5  -1   1  397.86   12.80
   5  -1  -1  406.96   17.20
   5  -1  -1  406.36   12.40
  -5   1   0 1871.11   50.59
  -5   1   0 1881.71   49.20
  -5   1   0 1867.01   53.29
   5   1   0 1896.21   51.89
   5   1   0 1862.81   52.89
  -5   1   0 1940.71   52.49
   5  -1   0 1906.31   53.49
   5  -1   0 1881.41   52.29
   5  -1   0 1911.41   53.29
   5  -1   0 1944.01   49.20
  -5  -1   0 1978.40   53.59
  -5  -1   0 1957.10   50.29
  -5  -1   0 1968.40   52.19
  -5   1  -1  234.68   12.30
   5   1   1  245.68   11.90
  -5   1  -1  238.58   14.50
  -5   1  -1  255.27   11.70
   5   1   1  260.77   14.40
   5  -1   1  229.58   12.40
   5  -1   1  220.48   13.60
  -5  -1  -1  244.08   11.90
   5  -1   1  235.28   11.90
   5  -1   1  251.47   14.50
  -5  -1  -1  240.38   14.50
  -5  -1  -1  242.58   11.80
  -5   1  -2  661.23   23.90
  -5   1  -2  585.64   20.20
   5   1   2  627.74   23.50
   5   1   2  604.34   19.80
   5  -1   2  611.74   22.30
   5  -1   2  587.44   20.30
  -5  -1  -2  546.45   19.30
   5  -1   2  608.44   23.40
   5  -1   2  593.04   21.50
  -5  -1  -2  606.04   23.90
  -5   1  -3   12.00    7.20
   5   1   3   11.50    7.10
   5   1   3   25.50    7.80
  -5   1  -3   18.30    6.90
  -5   1  -3   16.50    4.90
   5   1   3   21.90    4.80
  -5  -1  -3   17.30    7.90
   5  -1   3   18.90    7.00
   5  -1   3   19.20    5.30
  -5   1  -4 1527.05   47.30
  -5   1  -4 1558.84   41.80
   5   1   4 1581.44   47.50
   5   1   4 1522.25   40.90
   5   1   4 1608.44   48.10
   5  -1   4 1586.44   46.80
  -5  -1  -4 1480.35   47.70
   5  -1   4 1615.94   47.30
   5  -1   4 1523.75   41.80
  -5   1  -5   85.59    6.90
   5   1   5   85.89   10.80
  -5   1  -5   66.59   10.50
   5   1   5   69.49   11.40
   5  -1   5   66.29   10.80
   5  -1   5   88.09   11.00
  -5  -1  -5   48.20   10.00
  -5   1  -6  454.35   23.50
   5   1   6  501.55   25.50
   5  -1   6  496.75   24.90
  -5  -1  -6  472.15   23.90
   5   1   7   21.00   11.00
  -5   1  -7    3.80    8.90
  -5  -1  -7   17.40   10.30
   5  -1   7   21.10   11.10
   5   1   8   35.90   12.60
  -5   1  -8   67.89   12.60
   5  -1   8   51.19   13.70
  -5  -1  -8   44.20   12.00
   5   1   9   32.50   12.50
  -5   1  -9   11.60    9.90
  -5  -1  -9   -0.20   10.10
   5  -1   9   20.80   12.00
  -5   1 -10  125.59   16.20
   5   1  10  118.29   18.20
   5  -1  10  104.09   17.80
  -5  -1 -10  126.79   16.90
   5   1  11   10.70   14.10
  -5   1 -11   10.00   10.40
   5  -1  11   14.40   13.70
  -5  -1 -11    1.80   11.40
   5   1  12   83.69   18.60
  -5   1 -12   69.39   15.20
  -5  -1 -12   77.09   16.40
   5  -1  12   67.29   17.80
  -5   2  15    1.90   12.30
  -5  -2  15   -6.70   12.30
   5  -2 -15   -1.50    9.90
   5   2 -14    7.20    8.80
  -5   2  14   -1.10   11.00
   5   2 -14    8.40    5.10
   5  -2 -14    4.70    9.70
   5  -2 -14   -4.40    9.30
  -5  -2  14  -26.10   11.50
  -5   2  13   12.50   11.30
   5   2 -13    7.50    9.00
   5   2 -13   14.40    5.20
   5  -2 -13   14.90    9.50
  -5  -2  13   25.80   12.30
   5  -2 -13    9.70    9.50
  -5   2  12   10.90    7.80
  -5   2  12   18.50   10.40
   5   2 -12    1.10    4.50
   5   2 -12    1.80    8.80
   5  -2 -12   -5.50    8.10
   5  -2 -12    0.00    8.40
  -5  -2  12  -12.50    9.60
   5   2 -11  179.78    9.70
  -5   2  11  203.68   17.20
   5   2 -11  164.58   15.30
  -5   2  11  175.18   15.40
   5  -2 -11  199.28   16.30
   5  -2 -11  171.28   15.90
  -5  -2  11  175.18   17.30
   5   2 -10   45.40    5.60
  -5   2  10   48.70    9.80
   5   2 -10   49.30   10.40
   5   2 -10   49.60    5.30
  -5   2  10   47.80   10.40
   5   2 -10   50.59   10.30
   5  -2 -10   54.39   10.70
   5  -2 -10   45.90   10.70
   5  -2 -10   44.80   11.30
  -5  -2  10   42.00   10.60
   5   2  -9    7.20    7.30
   5   2  -9    6.30    3.70
  -5   2   9    7.70    6.90
   5   2  -9    6.60    3.90
  -5   2   9    0.90    7.40
   5   2  -9    5.90    8.60
   5  -2  -9   12.60    8.50
  -5  -2   9   12.20    8.20
   5  -2  -9    3.30    8.60
   5  -2  -9   10.50    8.80
   5   2  -8   57.99    8.70
  -5   2   8   68.89    8.90
   5   2  -8   47.90    5.20
  -5   2   8   53.69    9.30
   5   2  -8   51.09    5.00
   5   2  -8   65.99   10.50
  -5   2   8   44.50    9.10
  -5  -2   8   58.29    9.20
   5  -2  -8   61.79   10.00
   5  -2  -8   58.59   10.70
   5  -2  -8   56.49   10.00
  -5   2   7  744.93   24.60
   5   2  -7  729.73   28.20
  -5   2   7  737.33   27.60
   5   2  -7  731.43   21.20
  -5   2   7  720.93   27.00
   5   2  -7  766.12   25.60
   5   2  -7  717.73   21.30
   5  -2  -7  779.42   27.20
   5  -2  -7  718.53   28.10
  -5  -2   7  731.73   25.60
   5  -2  -7  720.23   26.90
  -5   2   6  978.20   32.50
   5   2  -6  954.60   26.70
  -5   2   6  963.90   31.90
   5   2  -6  940.11   29.00
   5   2  -6  996.70   29.70
   5   2  -6  944.31   26.70
  -5   2   6  891.11   27.90
   5   2  -6  964.10   33.00
   5  -2  -6 1003.70   31.10
   5  -2  -6  917.21   32.00
   5  -2  -6  982.90   33.00
   5   2  -5  935.51   27.50
   5   2  -5  957.40   28.20
   5   2  -5  906.11   31.90
   5   2  -5  937.11   26.80
   5   2  -5  921.31   26.80
  -5   2   5  939.31   29.00
  -5   2   5  999.70   32.20
  -5   2   5  935.91   30.80
   5  -2  -5  895.51   30.80
   5  -2  -5  953.80   29.40
   5  -2  -5  938.31   32.10
   5   2  -4 1522.75   42.10
   5   2  -4 1577.44   41.30
  -5   2   4 1536.35   46.20
   5   2  -4 1588.24   46.40
  -5   2   4 1512.45   42.80
   5   2  -4 1576.44   41.90
   5   2  -4 1553.14   42.10
   5  -2  -4 1544.15   42.90
  -5  -2   4 1615.24   42.10
   5  -2  -4 1576.54   45.70
   5  -2  -4 1490.75   46.10
   5   2  -3 1112.19   36.10
   5   2  -3 1169.18   33.20
  -5   2   3 1156.78   33.10
  -5   2   3 1202.28   35.80
   5   2  -3 1147.99   31.20
  -5  -2   3 1169.98   33.20
   5  -2  -3 1159.58   35.20
   5  -2  -3 1147.79   32.60
   5  -2  -3 1131.29   35.50
   5  -2  -3 1137.29   36.30
  -5  -2   3 1164.58   31.00
   5   2  -2  171.88   12.70
  -5   2   2  187.08   10.40
  -5   2   2  185.68   13.00
  -5   2   2  174.48    7.70
   5   2  -2  160.28   10.70
   5   2  -2  154.58    8.70
  -5   2   2  168.98   12.40
   5  -2  -2  192.78    9.70
   5  -2  -2  180.38   13.10
   5  -2  -2  172.08   12.10
  -5  -2   2  164.98    8.20
  -5  -2   2  165.98   10.60
   5  -2  -2  184.08   12.70
  -5   2   1  594.44   17.60
  -5   2   1  570.14   19.30
   5   2  -1  599.34   21.00
   5   2  -1  576.84   18.10
   5   2  -1  593.94   21.60
  -5   2   1  599.84   22.20
  -5   2   1  552.84   21.90
  -5  -2   1  550.24   20.70
   5  -2  -1  591.44   22.00
  -5  -2   1  568.54   18.60
   5  -2  -1  587.64   21.70
   5  -2  -1  542.35   18.80
   5  -2  -1  521.55   21.00
  -5   2   0 1180.88   35.40
  -5   2   0 1139.69   34.50
   5   2   0 1068.79   34.40
  -5   2   0 1123.29   34.70
   5   2   0 1122.59   33.80
  -5   2   0 1093.09   31.10
  -5   2   0 1135.59   33.10
   5  -2   0 1112.89   31.30
   5  -2   0 1128.69   34.70
  -5  -2   0 1100.09   32.30
   5  -2   0 1131.29   35.10
  -5  -2   0 1090.19   34.50
   5  -2   0 1107.29   34.30
  -5   2  -1 1435.16   43.60
  -5   2  -1 1461.65   42.40
  -5   2  -1 1498.85   40.80
   5   2   1 1503.65   41.90
  -5   2  -1 1503.45   42.60
   5   2   1 1453.85   43.50
  -5  -2  -1 1434.96   41.80
  -5  -2  -1 1446.16   43.80
   5  -2   1 1492.15   42.70
   5  -2   1 1514.65   40.90
   5  -2   1 1414.06   43.10
   5  -2   1 1500.15   43.50
   5   2   2 2647.94   69.79
   5   2   2 2779.92   73.89
  -5   2  -2 2664.13   70.29
  -5   2  -2 2654.13   70.79
  -5   2  -2 2619.54   72.79
   5  -2   2 2679.03   71.09
  -5  -2  -2 2734.23   72.29
   5  -2   2 2612.54   70.19
  -5  -2  -2 2722.83   73.89
   5  -2   2 2583.64   72.69
  -5   2  -3  165.18   13.30
  -5   2  -3  170.48   12.50
  -5   2  -3  181.48   11.70
   5   2   3  182.38   10.20
   5   2   3  187.08   13.50
  -5  -2  -3  165.78   14.20
  -5  -2  -3  189.48   14.30
   5  -2   3  198.48   13.60
   5  -2   3  191.48   14.00
   5  -2   3  188.98   12.10
   5  -2   3  188.28   13.50
   5   2   4   28.10    4.80
  -5   2  -4   22.20    8.40
  -5   2  -4   16.90    7.70
   5   2   4   23.60    8.50
  -5   2  -4   25.20    5.90
   5  -2   4   10.90    6.70
   5  -2   4   20.40    7.80
  -5  -2  -4   15.00    8.60
  -5  -2  -4   32.00    8.50
   5  -2   4   21.40    8.10
  -5   2  -5   67.59   10.70
   5   2   5   77.89   12.10
   5   2   5   79.59    5.80
  -5   2  -5   92.79   11.90
  -5   2  -5   84.79    7.80
  -5  -2  -5   88.89   12.90
   5  -2   5   54.09   10.90
   5  -2   5   69.49   10.80
  -5  -2  -5   89.39   12.50
  -5   2  -6  180.68   10.30
   5   2   6  138.09   15.30
  -5   2  -6  184.48   15.80
   5  -2   6  187.48   17.10
  -5  -2  -6  194.38   17.70
   5  -2   6  178.98   15.40
   5   2   7  348.97   23.90
  -5   2  -7  336.07   21.40
  -5   2  -7  320.57   12.60
   5  -2   7  344.27   20.30
   5  -2   7  363.66   23.20
  -5  -2  -7  326.87   22.70
   5   2   8  159.38   18.00
  -5   2  -8  151.28   15.80
   5  -2   8  161.38   16.00
  -5  -2  -8  161.58   17.80
   5  -2   8  151.78   17.80
   5   2   9  150.58   19.00
  -5   2  -9  154.38   16.50
  -5  -2  -9  169.38   19.10
   5  -2   9  169.38   16.90
   5  -2   9  166.98   19.10
   5   2  10    7.30   12.70
  -5   2 -10   15.60   10.40
  -5  -2 -10   -1.40   11.40
   5  -2  10   18.70   13.30
   5   2  11   40.70   16.20
  -5   2 -11   17.50   11.30
   5  -2  11   43.80   15.50
  -5  -2 -11   12.40   12.40
  -5   3  15   13.00   12.90
  -5  -3  15    2.80   13.80
   5  -3 -15   14.10   11.50
  -5   3  14   13.20   12.10
   5   3 -14   -4.50    9.10
  -5  -3  14  -21.20   11.70
   5  -3 -14    7.40    9.90
   5  -3 -14    0.60   10.00
   5   3 -13    3.00    9.10
  -5   3  13   12.00   11.30
  -5  -3  13    6.90   11.50
   5  -3 -13    6.80   10.20
   5  -3 -13    2.80    9.50
   5   3 -12    3.50    9.00
  -5   3  12   24.50   10.90
   5  -3 -12   -1.20    9.50
   5  -3 -12    2.30    9.00
  -5  -3  12   -4.60   10.20
  -5   3  11    5.30    7.10
   5   3 -11   22.50    9.60
  -5   3  11    2.40    9.40
  -5  -3  11   -6.10    9.50
   5  -3 -11    3.50    9.40
   5  -3 -11    3.30    8.70
   5   3 -10  104.79   13.70
  -5   3  10   66.69   10.90
  -5   3  10   93.39   13.20
   5  -3 -10   68.89   12.20
  -5  -3  10   57.89   12.20
   5  -3 -10   79.39   12.90
  -5   3   9  387.56   20.70
   5   3  -9  397.16   21.40
   5   3  -9  406.56   23.20
  -5   3   9  426.96   21.90
   5  -3  -9  415.06   22.90
   5  -3  -9  435.16   24.00
   5  -3  -9  410.06   23.20
  -5   3   8   86.99   11.30
   5   3  -8   86.79   10.70
   5   3  -8   99.19   13.00
  -5   3   8   73.49    9.90
   5   3  -8   79.89   10.20
   5  -3  -8   78.69   11.90
   5  -3  -8   65.89   10.90
   5  -3  -8   74.59   11.30
   5   3  -7  605.74   23.30
  -5   3   7  554.94   25.10
  -5   3   7  569.24   24.30
   5   3  -7  598.24   16.20
   5   3  -7  572.64   26.00
   5   3  -7  569.44   22.60
  -5   3   7  644.04   25.20
   5   3  -7  554.74   16.10
   5  -3  -7  603.54   26.00
   5  -3  -7  545.45   25.20
   5  -3  -7  617.74   25.50
   5   3  -6  234.38   17.10
   5   3  -6  238.38   13.80
   5   3  -6  258.37   14.50
   5   3  -6  251.27    9.70
   5   3  -6  263.37    9.80
  -5   3   6  249.18   16.60
  -5   3   6  237.08   15.60
   5  -3  -6  249.78   16.40
   5  -3  -6  237.68   16.00
   5  -3  -6  256.07   17.30
  -5   3   5  407.36   18.50
   5   3  -5  413.46   17.30
  -5   3   5  393.06   18.70
   5   3  -5  397.66   14.00
  -5   3   5  405.96   19.80
   5   3  -5  398.76   20.20
   5   3  -5  423.16   16.70
   5   3  -5  416.46   14.30
   5  -3  -5  401.86   20.40
   5  -3  -5  419.06   18.40
  -5  -3   5  376.86   13.50
   5  -3  -5  410.96   19.90
  -5   3   4   13.20    6.60
  -5   3   4   10.80    6.80
   5   3  -4    6.20    7.30
   5   3  -4   12.10    5.20
  -5   3   4   11.80    6.70
   5   3  -4   10.30    4.60
  -5  -3   4   20.90    4.90
   5  -3  -4    3.80    5.50
   5  -3  -4   10.70    7.30
   5  -3  -4    4.70    7.40
  -5   3   3 2272.87   62.69
   5   3  -3 2280.17   64.59
  -5   3   3 2277.07   64.29
   5   3  -3 2361.26   60.89
   5   3  -3 2287.17   60.89
  -5  -3   3 2334.07   60.69
   5  -3  -3 2311.67   62.09
   5  -3  -3 2302.07   65.09
  -5  -3   3 2280.97   60.79
   5  -3  -3 2297.37   64.49
   5   3  -2   21.50    5.90
  -5   3   2   25.70    8.10
  -5   3   2   27.50    7.90
   5   3  -2   21.20    7.00
   5   3  -2   14.10    5.60
  -5   3   2   18.70    6.40
  -5  -3   2   22.10    6.00
   5  -3  -2    7.70    6.30
   5  -3  -2   11.50    7.50
   5  -3  -2   22.00    7.30
   5  -3  -2   12.10    5.50
  -5  -3   2    9.80    4.50
  -5   3   1 1874.71   48.60
   5   3  -1 1811.72   52.29
  -5   3   1 1793.32   51.19
   5   3  -1 1801.62   49.99
  -5   3   1 1853.31   52.99
   5   3  -1 1899.91   51.69
  -5   3   1 1811.52   53.09
  -5  -3   1 1821.72   51.59
   5  -3  -1 1815.22   53.19
   5  -3  -1 1838.62   52.59
   5  -3  -1 1824.12   50.89
   5  -3  -1 1792.02   52.69
  -5  -3   1 1877.81   50.19
  -5   3   0  149.99   12.10
  -5   3   0  135.29    9.90
   5   3   0  172.28   12.10
  -5   3   0  183.08   12.70
   5   3   0  171.78   12.30
  -5   3   0  165.48   13.30
   5   3   0  187.48   12.90
  -5  -3   0  158.28   11.50
   5  -3   0  149.19   12.30
   5  -3   0  178.58   12.50
  -5  -3   0  190.38   13.10
   5  -3   0  139.69   12.00
  -5   3  -1  425.86   19.60
   5   3   1  426.26   18.70
  -5   3  -1  431.96   19.60
   5   3   1  448.86   18.10
  -5   3  -1  426.96   19.20
  -5   3  -1  443.56   17.50
   5   3   1  410.46   19.50
  -5  -3  -1  437.46   18.80
   5  -3   1  413.36   19.40
  -5  -3  -1  420.66   19.90
   5  -3   1  443.66   17.90
   5  -3   1  434.26   19.90
  -5   3  -2   26.20    7.20
  -5   3  -2   16.70    7.50
  -5   3  -2   17.60    6.60
   5   3   2   14.50    8.00
   5   3   2    6.20    5.30
  -5   3  -2   19.60    7.10
  -5  -3  -2   18.20    8.00
   5  -3   2   18.90    7.20
   5  -3   2   16.00    6.90
   5  -3   2   15.90    7.30
  -5  -3  -2   23.10    7.60
   5  -3   2   25.00    7.20
   5   3   3  858.41   31.20
  -5   3  -3  797.12   27.80
   5   3   3  813.22   26.30
  -5   3  -3  822.82   28.70
  -5   3  -3  802.12   30.20
  -5   3  -3  802.62   29.40
  -5  -3  -3  820.12   31.30
  -5  -3  -3  847.82   30.20
   5  -3   3  791.42   28.80
   5  -3   3  851.51   29.10
   5  -3   3  820.52   29.30
  -5   3  -4  442.66   21.00
   5   3   4  405.56   16.70
   5   3   4  492.15   23.10
  -5   3  -4  446.06   19.20
  -5   3  -4  458.95   21.40
   5  -3   4  455.95   21.60
   5  -3   4  429.66   20.40
  -5  -3  -4  461.05   22.70
   5  -3   4  446.36   20.80
  -5  -3  -4  478.65   23.70
   5   3   5 1000.00   28.80
  -5   3  -5  958.50   34.10
  -5   3  -5  976.80   31.30
  -5   3  -5  989.90   35.40
  -5  -3  -5 1015.70   37.40
  -5  -3  -5  937.21   36.80
   5  -3   5  943.11   35.00
   5  -3   5  915.91   33.70
  -5   3  -6  141.19   14.30
   5   3   6  154.98    8.70
  -5   3  -6  155.98   12.50
   5   3   6  142.99    9.00
  -5  -3  -6  149.29   16.50
   5  -3   6  155.78   14.50
   5  -3   6  131.09   15.50
  -5   3  -7   32.90   10.10
   5   3   7   68.79   14.30
  -5   3  -7   44.90    7.40
   5  -3   7   46.20   10.60
   5  -3   7   22.50   11.30
  -5  -3  -7   50.69   13.60
  -5   3  -8    7.40    8.90
   5   3   8    5.00   11.30
  -5   3  -8    7.40    5.30
   5  -3   8   17.80    9.30
  -5  -3  -8   -4.10   10.70
   5  -3   8    9.00   10.40
   5   3   9  -11.60   11.80
  -5   3  -9  -11.40    8.30
  -5  -3  -9   -6.70   10.70
   5  -3   9   11.40   11.90
   5  -3   9    5.60    8.90
   5   3  10   35.10   15.10
  -5   3 -10   51.59   12.00
  -5  -3 -10   44.20   14.50
   5  -3  10   27.60   13.80
   5   3  11    9.60   13.80
  -5   3 -11    1.40   10.00
  -5  -3 -11   -4.50   12.40
   5  -3  11  -20.40   10.90
  -5   4  14   22.20   13.20
   5   4 -14   25.10   12.00
   5   4 -14   14.30   10.80
   5  -4 -14   13.90   10.70
  -5  -4  14   -1.30   12.80
   5  -4 -14   26.30   12.60
  -5   4  13   41.00   13.40
   5   4 -13   34.80   12.20
   5   4 -13   49.90   12.20
   5  -4 -13   48.10   13.20
   5  -4 -13   56.29   12.60
  -5   4  12   20.90   11.50
   5   4 -12   26.80   11.20
   5   4 -12    2.30    9.70
   5  -4 -12   -5.70    9.50
   5  -4 -12  -15.70    9.90
   5   4 -11   81.09   13.90
  -5   4  11   95.09   14.00
   5   4 -11   98.19   13.80
   5  -4 -11   78.69   13.30
   5  -4 -11   92.69   14.70
   5   4 -10    8.60    9.20
   5   4 -10   23.00   10.90
  -5   4  10   19.70   10.60
   5  -4 -10   15.30   10.50
   5  -4 -10    5.50    9.80
  -5   4   9    4.80    8.80
   5   4  -9   16.50    8.80
   5   4  -9   17.00   10.10
   5  -4  -9    2.60    9.60
   5  -4  -9    3.00    9.30
   5   4  -8   -1.40    7.50
   5   4  -8   -3.50    7.90
   5   4  -8    3.20    9.50
  -5   4   8   -1.00    9.10
  -5   4   8   -4.20    7.70
   5  -4  -8    5.00    9.20
   5  -4  -8   -2.20    8.90
   5  -4  -8   14.40   10.00
   5   4  -7  144.79   14.90
   5   4  -7  172.28   13.80
   5   4  -7  186.58   15.00
  -5   4   7  187.48   15.70
  -5   4   7  164.68   14.80
   5  -4  -7  157.38   15.50
   5  -4  -7  169.18   15.30
   5  -4  -7  173.58   16.10
  -5   4   6   24.80    8.00
   5   4  -6   31.20    9.70
   5   4  -6   18.50    3.80
  -5   4   6   16.10    8.80
  -5   4   6   18.80    8.50
   5   4  -6   19.80    4.10
   5   4  -6   12.30    7.30
   5   4  -6   17.10    7.30
   5  -4  -6   29.00    9.60
   5  -4  -6   22.80    8.60
   5  -4  -6   12.70    7.90
   5   4  -5  416.06   18.60
  -5   4   5  367.66   21.00
  -5   4   5  399.36   20.90
  -5   4   5  395.36   20.60
   5   4  -5  421.86   21.40
   5   4  -5  407.36   14.40
   5   4  -5  390.16   18.20
  -5  -4   5  404.76   13.90
   5  -4  -5  406.26   22.00
   5  -4  -5  372.26   19.00
   5  -4  -5  385.46   21.00
   5   4  -4  120.59    8.90
   5   4  -4  109.39   10.10
  -5   4   4  139.19   14.10
  -5   4   4  110.29   12.50
   5   4  -4  151.38   14.20
  -5   4   4  101.59   11.20
   5  -4  -4   86.39   10.00
  -5  -4   4  112.79    8.70
  -5  -4   4   96.29    9.00
   5  -4  -4   91.49   12.00
   5  -4  -4   93.99   11.60
   5   4  -3  554.44   21.00
  -5   4   3  555.04   23.50
   5   4  -3  514.95   19.50
  -5   4   3  482.45   22.20
   5   4  -3  534.85   23.60
  -5   4   3  547.85   23.00
   5  -4  -3  534.25   21.40
   5  -4  -3  536.85   23.50
  -5  -4   3  525.55   19.10
   5  -4  -3  500.95   24.00
  -5   4   2   24.60    7.80
   5   4  -2   13.50    6.10
  -5   4   2    1.60    6.80
  -5   4   2    8.10    7.90
   5   4  -2   15.50    6.70
   5  -4  -2   11.50    6.10
  -5  -4   2    9.10    5.70
   5  -4  -2    7.00    7.20
  -5  -4   2   -0.50    3.50
   5  -4  -2   17.60    9.00
  -5   4   1   24.70    8.30
   5   4  -1   27.10    7.30
   5   4  -1   20.20    7.20
  -5   4   1    6.00    4.50
  -5   4   1   21.90    7.60
  -5   4   1   21.20    8.10
   5  -4  -1   26.60    8.40
  -5  -4   1   13.80    6.10
  -5  -4   1   18.30    6.80
   5  -4  -1   24.50    6.70
   5  -4  -1   25.20    6.90
   5  -4  -1   18.10    8.80
  -5   4   0   62.39    8.20
  -5   4   0   61.19    9.10
   5   4   0   75.69    9.60
  -5   4   0   73.59    9.60
  -5   4   0   57.59    9.50
   5   4   0   61.29    9.10
   5  -4   0   50.79    8.80
   5  -4   0   83.89   11.20
  -5  -4   0   60.89    8.70
  -5  -4   0   73.99   10.40
   5  -4   0   90.09    9.80
  -5   4  -1 1286.87   40.60
  -5   4  -1 1276.87   38.50
  -5   4  -1 1218.68   40.40
  -5   4  -1 1269.57   40.70
   5   4   1 1323.07   40.90
   5   4   1 1258.47   39.70
  -5  -4  -1 1244.88   40.30
   5  -4   1 1308.57   39.80
   5  -4   1 1298.67   41.20
  -5  -4  -1 1216.38   40.50
   5  -4   1 1242.08   40.20
   5   4   2   14.50    7.80
  -5   4  -2   23.70    7.40
   5   4   2   20.50    8.80
  -5   4  -2   21.20    8.20
  -5   4  -2   21.00    8.20
  -5   4  -2   18.30    8.30
   5  -4   2   17.00    7.20
  -5  -4  -2   12.70    8.40
   5  -4   2    9.00    7.20
  -5  -4  -2   18.60    7.90
  -5   4  -3  950.50   34.10
  -5   4  -3 1016.40   36.50
   5   4   3 1101.59   37.20
  -5   4  -3 1025.70   34.60
  -5  -4  -3  973.10   36.50
   5  -4   3 1019.20   35.00
   5  -4   3  984.30   34.00
   5  -4   3 1023.20   34.50
  -5  -4  -3 1023.00   36.30
  -5   4  -4   25.80    9.70
   5   4   4   18.10    6.50
   5   4   4   16.40    9.10
  -5   4  -4   27.60    9.40
  -5   4  -4   36.00    9.30
  -5   4  -4   23.50    8.30
  -5  -4  -4   16.20    9.80
   5  -4   4   23.20    9.40
   5  -4   4   45.10    9.40
  -5  -4  -4   28.70   10.30
  -5   4  -5   15.60    8.00
  -5   4  -5   12.00    8.30
  -5   4  -5   -1.90    9.10
   5   4   5    0.00    5.40
   5  -4   5   -4.70    8.60
  -5  -4  -5   13.20   10.50
   5  -4   5    3.90    7.70
  -5   4  -6    7.80    7.80
  -5   4  -6   -0.80    8.60
   5   4   6    6.30    4.70
   5   4   6    3.40    5.10
  -5   4  -6   -3.90   10.40
   5  -4   6    0.20    9.60
  -5  -4  -6   -0.50   10.90
   5  -4   6   15.00    8.70
  -5   4  -7  145.29   12.30
   5   4   7  137.09    9.80
  -5   4  -7  112.59   15.80
   5   4   7  118.39    9.20
  -5   4  -7  124.79   14.10
   5  -4   7  143.59   14.50
  -5  -4  -7  129.09   18.50
   5  -4   7  113.29   15.60
  -5   4  -8   26.80   10.10
   5   4   8   43.60   14.10
  -5  -4  -8   33.50   12.90
   5  -4   8   22.90    9.40
   5  -4   8   22.60   13.00
  -5   4  -9  111.89   14.30
   5   4   9   99.39   18.00
  -5  -4  -9  109.19   18.20
   5  -4   9   85.59   16.50
   5   4  10    8.90   13.20
  -5   4 -10   -8.50    8.90
   5  -4  10    2.20   13.20
  -5  -4 -10   -8.30   11.10
   5   4  11   16.30   15.60
  -5   4 -11    4.80    9.70
  -5  -4 -11  -16.20   12.20
   5  -4  11   18.80   14.90
   5   5 -14  -14.70   10.40
  -5   5  14   20.90   13.30
   5   5 -14    0.60   10.60
   5  -5 -14    8.50   12.60
   5   5 -13   30.70   11.90
  -5   5  13   37.30   13.60
   5   5 -13   13.00   11.40
   5  -5 -13   28.00   11.30
   5  -5 -13   45.80   14.00
   5   5 -12   -7.60    9.60
  -5   5  12   -5.30   10.80
   5   5 -12   10.60   11.00
   5  -5 -12    2.30   11.00
   5  -5 -12  -10.00    9.80
   5   5 -11   14.50   10.40
  -5   5  11   17.60   11.90
   5   5 -11   39.60   12.30
   5  -5 -11   14.50   11.00
   5  -5 -11   14.60   11.80
   5   5 -10   50.19   11.80
   5   5 -10   56.59   12.80
   5  -5 -10   36.30   11.70
   5  -5 -10   61.29   13.70
   5   5  -9  275.47   20.70
   5   5  -9  241.58   20.30
  -5   5   9  245.68   21.10
   5  -5  -9  246.58   20.50
   5  -5  -9  244.98   20.80
   5   5  -8   23.60    9.40
  -5   5   8    0.00   10.80
   5   5  -8    8.90   10.10
   5  -5  -8   13.90   11.10
   5  -5  -8   13.90   10.80
   5   5  -7   64.49   11.10
  -5   5   7   65.09   12.90
   5   5  -7   52.79   12.00
   5  -5  -7   62.19   12.60
   5  -5  -7   63.59   13.20
   5  -5  -7   69.89   13.10
  -5   5   6   29.40   10.90
   5   5  -6   25.30    9.10
   5   5  -6   28.60    4.80
   5   5  -6   20.00   10.10
   5   5  -6   37.30    9.20
   5  -5  -6   28.60    9.60
   5  -5  -6   50.79   11.70
  -5  -5   6   33.50    3.90
   5  -5  -6   21.30   10.50
   5   5  -5    0.60    7.30
  -5   5   5    0.10    8.30
  -5   5   5    7.20    8.20
   5   5  -5   -4.00    6.90
  -5   5   5   -4.10    9.00
   5   5  -5    4.00    4.70
   5  -5  -5    2.90    7.50
   5  -5  -5    4.90    9.90
   5  -5  -5   11.90    8.90
  -5  -5   5    4.40    4.30
   5   5  -4    8.40    5.20
   5   5  -4    7.70    7.80
  -5   5   4   16.80    8.80
  -5   5   4    2.20    9.20
  -5   5   4    6.70    8.80
  -5  -5   4    9.60    6.40
   5  -5  -4   16.80    8.90
   5  -5  -4    8.70    7.50
  -5  -5   4    7.10    5.10
   5  -5  -4    3.80    9.20
  -5   5   3  826.72   31.60
   5   5  -3  827.32   30.30
  -5   5   3  837.62   32.40
   5   5  -3  836.52   27.70
  -5   5   3  802.02   31.80
  -5  -5   3  776.82   26.80
  -5  -5   3  864.51   29.20
   5  -5  -3  856.41   33.60
   5  -5  -3  874.71   30.70
   5  -5  -3  841.72   32.10
  -5   5   2   98.89   12.30
   5   5  -2  122.09   12.30
   5   5  -2  112.59   10.80
  -5   5   2  151.58   14.60
  -5   5   2  112.99   13.10
   5  -5  -2  137.79   12.80
  -5  -5   2  101.69   10.50
   5  -5  -2  114.49   12.50
   5  -5  -2  107.19   13.20
  -5  -5   2   95.99   10.10
   5   5  -1 1501.55   44.40
  -5   5   1 1426.46   42.80
  -5   5   1 1419.16   46.70
   5   5  -1 1357.36   44.60
  -5   5   1 1447.36   46.00
  -5   5   1 1490.45   46.60
   5  -5  -1 1405.66   45.70
   5  -5  -1 1424.56   45.20
  -5  -5   1 1411.56   43.70
  -5  -5   1 1507.85   44.70
   5  -5  -1 1460.95   47.50
   5   5   0   33.70    8.50
  -5   5   0   23.20    8.90
   5   5   0   27.00    9.40
  -5   5   0   36.00    8.00
  -5   5   0   34.80    9.70
  -5   5   0   23.90    8.80
   5  -5   0   14.80    6.00
  -5  -5   0   23.20    7.90
   5  -5   0   23.60    9.00
   5  -5   0   36.70    8.50
  -5  -5   0    9.50    7.80
   5   5   1  151.58   13.90
  -5   5  -1  123.19   13.10
  -5   5  -1  132.69   13.30
  -5   5  -1  143.89   12.60
  -5   5  -1  147.29   14.70
   5   5   1  136.79   13.00
   5  -5   1  124.59   12.30
  -5  -5  -1  132.99   13.70
   5  -5   1  135.59   12.90
  -5  -5  -1  144.19   14.20
  -5   5  -2   18.50    8.90
   5   5   2   13.30    9.30
  -5   5  -2   12.40    8.10
  -5   5  -2    7.40    9.30
  -5   5  -2   13.70    8.60
   5   5   2   32.60    9.60
   5  -5   2   18.50    8.10
  -5  -5  -2   13.50    9.20
  -5  -5  -2   23.80    9.40
  -5   5  -3  191.98   16.00
   5   5   3  254.87   18.80
   5   5   3  233.88   18.30
  -5   5  -3  243.28   19.50
  -5   5  -3  229.88   17.20
  -5   5  -3  252.67   17.70
  -5  -5  -3  251.47   18.50
  -5  -5  -3  223.98   18.60
   5  -5   3  246.68   17.10
  -5   5  -4   17.90   10.90
   5   5   4   -3.00   10.40
  -5   5  -4   16.40    8.70
   5  -5   4   17.90    9.00
  -5  -5  -4   33.80   11.70
  -5   5  -5  256.17   18.70
  -5   5  -5  208.58   19.30
   5  -5   5  250.67   17.90
   5  -5   5  238.18   20.00
  -5  -5  -5  233.88   20.20
  -5   5  -6   48.50    9.90
   5   5   6   44.60    8.20
  -5   5  -6   36.30   12.80
   5  -5   6   38.20   10.20
   5  -5   6   58.29   12.60
  -5  -5  -6   35.80   12.80
  -5   5  -7  110.99   16.50
  -5   5  -7  120.09   12.90
   5   5   7  125.39   10.10
  -5  -5  -7  127.09   17.80
   5  -5   7  130.99   16.80
   5  -5   7  114.19   13.30
  -5   5  -8  115.99   17.60
   5  -5   8   87.99   16.80
  -5  -5  -8  104.19   18.10
   5   5   9   -0.60   14.40
  -5   5  -9   49.10   15.20
  -5  -5  -9   36.70   15.50
   5  -5   9   26.10   14.30
  -5   5 -10   33.90   15.00
  -5   5 -10   31.10   11.20
   5   5  10   20.60   15.70
  -5  -5 -10   32.20   14.40
   5  -5  10   39.00   16.30
  -5   6  13   12.30   13.60
   5   6 -13   11.60   12.90
   5   6 -13   50.09   13.10
   5  -6 -13   13.00   13.50
   5   6 -12   23.20   12.10
  -5   6  12    6.00   12.80
   5   6 -12   39.40   13.00
   5  -6 -12   32.00   14.20
   5   6 -11   48.30   13.50
   5   6 -11   69.49   14.10
   5  -6 -11   54.69   13.40
   5  -6 -11   50.29   14.40
   5   6 -10    4.40   10.20
  -5   6  10   -5.00   11.60
   5   6 -10   -4.70   10.10
   5  -6 -10  -10.90   11.30
   5  -6 -10    4.10   10.70
   5   6  -9    1.40   10.50
  -5   6   9   -5.20   11.30
   5   6  -9  -11.10    8.60
   5  -6  -9    4.30   10.40
   5  -6  -9  -10.20   10.10
   5   6  -8   91.29   13.70
  -5   6   8   65.29   14.50
   5   6  -8  107.69   15.80
   5  -6  -8   58.59   14.50
   5  -6  -8   90.79   14.60
   5   6  -7  127.09   14.40
   5   6  -7   79.89   14.40
  -5   6   7  111.39   15.90
   5  -6  -7  100.69   15.30
   5  -6  -7   76.69   14.30
  -5   6   6  199.98   18.80
   5   6  -6  195.88   16.80
   5   6  -6  212.78   11.10
  -5  -6   6  207.08    9.40
   5  -6  -6  203.58   18.60
   5  -6  -6  159.48   17.40
  -5   6   5  369.66   26.50
   5   6  -5  442.26   23.40
   5   6  -5  392.36   16.40
  -5  -6   5  405.16   15.80
   5  -6  -5  383.96   25.50
  -5  -6   5  396.66   21.00
   5  -6  -5  415.36   25.00
   5   6  -4  197.78   13.30
  -5   6   4  212.38   18.20
  -5   6   4  224.58   19.20
   5   6  -4  175.18   15.60
   5  -6  -4  224.48   19.40
   5  -6  -4  202.08   17.90
  -5  -6   4  193.88   15.80
   5  -6  -4  213.48   17.40
  -5  -6   4  192.38   12.50
   5   6  -3    9.10    9.20
   5   6  -3    4.00    6.70
  -5   6   3    2.30   10.50
  -5   6   3    1.30    9.00
   5  -6  -3   -3.50    9.10
  -5  -6   3   11.40    7.30
  -5  -6   3   -2.80    6.30
   5  -6  -3   17.10    9.10
   5  -6  -3    9.70   10.60
  -5   6   2    8.50    9.10
   5   6  -2   -0.70    9.30
  -5   6   2    4.50   10.00
   5   6  -2   11.90    7.30
  -5  -6   2   10.10    7.30
   5  -6  -2    9.80    9.00
  -5  -6   2    3.50    6.80
   5  -6  -2    9.90    8.20
   5   6  -1   33.20   10.50
   5   6  -1   25.00    8.30
  -5   6   1   20.50    9.80
  -5   6   1   25.70   11.30
   5  -6  -1    5.50    8.40
   5  -6  -1   10.50    8.90
  -5  -6   1   10.10    7.70
  -5  -6   1   21.40    8.40
   5   6   0   42.30    9.80
  -5   6   0   39.10   10.10
   5   6   0   41.60   11.10
  -5   6   0   54.09   11.80
  -5   6   0   43.80    9.40
  -5  -6   0   27.10    9.50
   5  -6   0   27.20    9.50
  -5  -6   0   57.39   10.60
  -5   6  -1  346.27   20.30
   5   6   1  356.66   20.80
  -5   6  -1  335.97   23.40
  -5   6  -1  362.26   21.20
   5   6   1  369.96   23.30
  -5  -6  -1  356.56   22.20
   5  -6   1  313.07   20.20
  -5  -6  -1  361.56   21.50
  -5   6  -2  462.05   23.80
   5   6   2  454.05   25.70
  -5   6  -2  469.55   26.70
   5   6   2  502.35   25.10
   5  -6   2  472.15   23.50
  -5  -6  -2  429.36   24.40
  -5   6  -3  456.95   27.20
  -5   6  -3  432.36   22.80
   5   6   3  429.46   26.70
   5  -6   3  403.46   22.50
  -5  -6  -3  432.36   25.70
   5   6   4   18.40   12.20
  -5   6  -4   31.50   12.20
  -5  -6  -4   40.10   13.10
   5  -6   4   37.40   10.20
  -5   6  -5   88.59   15.60
   5  -6   5   92.19   12.40
  -5  -6  -5   85.09   15.20
  -5   6  -6   15.70   12.60
   5   6   6    7.30    7.30
  -5  -6  -6   12.90   12.00
   5  -6   6    4.30    8.10
  -5   6  -7  201.18   21.80
  -5  -6  -7  218.68   22.90
  -5   6  -8   32.70   15.20
  -5  -6  -8   55.59   15.70
  -5   6  -9   19.70   15.90
  -5  -6  -9   36.70   15.70
   5  -6   9   31.10   14.60
   5   7 -12   15.90   12.70
   5   7 -12   -1.10   11.30
   5  -7 -12    8.00   13.10
   5   7 -11    0.20   11.00
   5   7 -11   -2.40   11.20
   5  -7 -11   -8.60   12.00
  -5   7  10  126.19   18.90
   5   7 -10  104.99   16.70
   5   7 -10  118.49   17.60
   5  -7 -10   92.59   17.80
  -5   7   9   -0.10   12.30
   5   7  -9   22.70   12.50
   5   7  -9    8.60   11.00
   5  -7  -9   13.00   12.70
   5   7  -8  140.09   18.20
   5   7  -8  117.89   15.90
  -5   7   8  138.59   18.30
   5  -7  -8  123.89   17.80
   5   7  -7   13.90    4.80
   5   7  -7    4.50   10.30
  -5   7   7   13.30   12.90
   5  -7  -7    3.40   11.10
   5   7  -6   17.70    6.20
  -5   7   6   14.50   13.10
   5   7  -6    2.20   10.10
   5  -7  -6   11.30   12.10
  -5  -7   6   16.90    5.20
  -5   7   5    9.70   12.80
   5   7  -5  -12.00    5.70
   5   7  -5   -0.50   10.40
   5  -7  -5   -7.20   10.50
  -5  -7   5    7.20    5.50
  -5   7   4  144.69   18.50
   5   7  -4  178.48   14.00
   5   7  -4  142.79   16.80
  -5  -7   4  152.38   12.40
   5  -7  -4  149.99   17.10
   5   7  -3    7.70    7.50
  -5   7   3   18.00   13.00
   5   7  -3    1.10   11.20
  -5  -7   3    6.40    7.20
   5  -7  -3   14.60   10.90
   5   7  -2  206.98   19.50
   5   7  -2  166.78   15.00
  -5   7   2  154.58   16.00
  -5   7   2  161.58   18.40
   5  -7  -2  189.68   18.40
  -5  -7   2  146.99   14.00
  -5   7   1  124.89   15.70
   5   7  -1  143.39   16.70
   5   7  -1  146.99   14.50
  -5   7   1  159.08   18.20
  -5  -7   1  121.49   13.40
   5  -7  -1  158.78   17.00
   5   7   0  171.78   17.90
   5   7   0  150.18   15.40
  -5   7   0  155.28   17.50
  -5   7   0  175.98   17.20
  -5  -7   0  148.29   15.70
   5  -7   0  178.58   17.10
   5   7   1   56.99   11.90
   5   7   1   53.79   13.40
  -5   7  -1   44.20   13.10
  -5   7  -1   37.70   11.30
   5  -7   1   48.20   11.60
  -5  -7  -1   29.30   11.30
   5   7   2    4.40    9.30
  -5   7  -2   14.10   12.30
   5   7   2   13.50   12.00
  -5   7  -2   17.20    9.80
   5  -7   2    5.30    8.90
  -5  -7  -2    1.60   10.30
  -5   7  -3    2.70    9.20
   5   7   3   18.30   12.60
  -5   7  -3   21.40   12.20
   5  -7   3   18.80    9.80
  -5  -7  -3   12.40   11.50
  -5   7  -4  403.16   23.60
   5   7   4  435.36   28.20
  -5   7  -4  373.76   27.70
   5  -7   4  416.46   22.80
  -5  -7  -4  406.16   27.00
  -5   7  -5   36.40   13.90
   5   7   5   52.19   14.60
   5  -7   5   51.39   11.10
  -5  -7  -5   33.30   13.40
  -5   7  -6   70.69   16.50
  -5  -7  -6   70.89   16.30
  -5   7  -7   12.60   14.30
  -5  -7  -7    6.30   14.40
  -5   7  -8   -6.20   13.90
  -5  -7  -8   -1.50   13.60
   5   8 -11  -12.60   11.20
   5   8 -11   -4.40   11.90
  -5   8  11   -0.50   14.50
   5  -8 -11    1.80   13.30
  -5   8  10   17.40   15.30
   5   8 -10    8.90   13.20
   5   8 -10    5.80   12.10
   5  -8 -10   18.80   14.10
   5   8  -9    2.90   12.30
  -5   8   9  -15.80   12.80
   5   8  -9   -5.10   12.20
   5  -8  -9  -13.90   12.60
  -5   8   8   12.30   13.80
   5   8  -8   30.00   12.70
   5  -8  -8   20.60   14.40
   5   8  -7   -4.60   10.80
  -5   8   7   10.00   14.20
   5  -8  -7   -1.40   12.30
   5   8  -6   24.40   13.00
  -5   8   6   40.60   15.50
   5  -8  -6   27.50   13.90
   5   8  -5   56.69   13.60
  -5   8   5   31.80   15.00
   5  -8  -5   36.20   13.50
  -5   8   4   72.39   16.40
   5   8  -4   73.19   15.30
   5   8  -4   78.69   10.80
   5  -8  -4   67.29   14.00
  -5  -8   4   93.89   10.60
   5   8  -3   25.90   13.20
   5   8  -3   42.80   10.20
  -5   8   3   77.99   16.50
  -5  -8   3   84.49   11.40
   5  -8  -3   50.79   13.90
   5   8  -2   24.00    9.10
  -5   8   2    2.00   13.10
   5   8  -2    9.90   12.10
  -5  -8   2    6.90    8.20
   5  -8  -2    7.30   10.70
  -5   8   1   35.30   12.30
   5   8  -1   38.60   13.90
  -5   8   1   15.30   13.20
   5   8  -1   38.30   10.50
   5  -8  -1   44.10   12.10
  -5  -8   1   46.00   10.80
   5   8   0   16.80   10.20
  -5   8   0   33.00   13.80
   5   8   0   37.50   14.00
  -5   8   0   23.00   11.00
   5  -8   0   12.80   10.70
  -5  -8   0   29.40   11.10
   5   8   1   29.80   13.30
  -5   8  -1   28.40   13.60
  -5   8  -1   30.60   11.70
   5   8   1   45.30   11.90
  -5  -8  -1   46.30   12.90
   5  -8   1   29.00   11.40
  -5   8  -2  398.26   24.20
   5   8   2  364.76   28.30
  -5   8  -2  316.67   26.10
  -5  -8  -2  356.06   24.80
   5  -8   2  377.76   23.90
   5   8   3   -0.20   12.70
  -5   8  -3   -7.30   13.00
   5  -8   3   -2.10    9.10
  -5  -8  -3    0.90   11.10
  -5   8  -4   42.80   15.30
   5   8   4   76.09   17.10
  -5  -8  -4   35.00   14.10
   5  -8   4   77.49   13.20
   5   8   5   21.10   14.40
  -5   8  -5    1.00   14.00
  -5  -8  -5    5.00   13.40
   5   8   6   26.30   15.00
  -5   8  -6    8.00   13.80
  -5  -8  -6   19.40   14.70
  -5   8  -7   -8.80   13.90
  -5  -8  -7   27.40   15.10
   5   9  -9   -3.50   12.90
  -5   9   9    1.30   15.40
   5   9  -9   -0.20   13.20
   5  -9  -9  -18.50   12.70
  -5   9   8   34.10   16.50
   5   9  -8    1.30   13.60
   5  -9  -8   28.10   15.00
  -5   9   7   17.60   15.30
   5   9  -7   16.70   13.40
   5  -9  -7    0.30   12.80
  -5   9   6   31.10   16.10
   5   9  -6   10.10   13.60
   5  -9  -6   -0.90   14.00
   5   9  -5  -14.40   12.50
  -5   9   5   18.70   15.80
   5  -9  -5   -1.00   12.90
  -5   9   4   20.50   15.30
   5   9  -4   -2.80   13.10
   5  -9  -4   11.90   13.20
   5   9  -3    1.80   13.10
  -5   9   3    9.60   14.90
   5  -9  -3   -1.50   11.30
  -5   9   2    8.00   14.80
   5   9  -2    5.50   13.00
  -5  -9   2    5.80    9.20
   5  -9  -2   10.60   11.10
  -5   9   1  -14.20   13.70
   5   9  -1    3.20   13.00
  -5  -9   1    2.80    9.40
   5  -9  -1   -5.50   10.20
  -5   9   0  120.19   19.10
   5   9   0   99.79   17.90
  -5  -9   0  103.79   15.50
   5  -9   0  105.59   16.20
  -5   9  -1   22.40   14.80
   5   9   1   -1.00   13.50
  -5  -9  -1   20.40   11.70
   5  -9   1   16.70   11.10
   5   9   2   17.30   14.70
  -5   9  -2   14.30   14.90
  -5  -9  -2   13.60   12.50
   5  -9   2   10.00   10.20
   5   9   3   23.10   14.50
  -5   9  -3    5.70   13.90
  -5  -9  -3    2.20   12.40
   5   9   4   41.50   15.60
  -5   9  -4   74.19   18.00
  -5  -9  -4   50.29   15.90
  -5   9  -5  -18.10   13.40
   5   9   5   11.90   15.20
  -5  -9  -5   -9.60   12.70
   5   9   6   18.90   15.90
  -5   9  -6   16.60   16.30
  -5  -9  -6   30.90   15.70
   5  10  -7  -10.40   14.60
  -5  10   7   -3.60   16.10
   5 -10  -7    5.50   14.50
  -5  10   6   22.70   17.40
   5  10  -6   12.00   16.10
   5 -10  -6   11.50   14.90
   5  10  -5    9.90   15.50
  -5  10   5   -4.10   16.90
   5 -10  -5   12.70   14.30
   5  10  -4   17.40   15.50
  -5  10   4   -2.70   16.80
   5 -10  -4    3.90   12.90
  -5  10   3  -12.10   15.70
   5  10  -3  -18.20   13.40
   5 -10  -3    1.90   12.60
   5  10  -2   11.70   14.90
  -5  10   2   13.10   16.90
   5 -10  -2    7.60   12.30
   5  10  -1    5.00   15.20
  -5  10   1   14.10   17.00
   5 -10  -1   -6.20   11.10
   5  10   0   75.39   18.60
  -5  10   0   41.00   18.20
   5 -10   0   48.70   14.30
  -5  10  -1   11.20   16.40
   5  10   1   18.80   15.40
  -5 -10  -1   13.00   12.10
   5  10   2   13.00   16.10
  -5  10  -2   41.30   17.50
  -5 -10  -2   30.00   14.50
  -5  10  -3   23.20   18.00
   5  10   3   -3.20   15.30
  -5 -10  -3   38.60   15.20
  -5  10  -4   -1.50   15.90
   5  10   4   -2.00   15.00
  -5 -10  -4   13.90   14.70
  -5  11   2  -17.80   16.70
   5  11  -2    6.40   16.20
   5 -11  -2   -7.20   13.30
  -5  11   1   46.10   20.00
   5  11  -1   25.70   17.70
   6   0 -15    0.30    7.90
  -6   0  15   11.20   12.60
   6   0 -15    8.70   10.20
  -6   0  14   81.59   14.90
   6   0 -14   87.69   13.80
   6   0 -14   89.69   11.80
  -6   0  13   -1.20   10.30
   6   0 -13    0.70    7.30
   6   0 -13    0.80    9.00
   6   0 -12   22.60    8.10
  -6   0  12   24.10   10.30
   6   0 -12   30.60   10.30
   6   0 -11   -1.90    8.40
   6   0 -11    8.40    7.00
   6   0 -11   -0.20    8.80
  -6   0  11   -5.10    7.90
   6   0 -10   78.29   12.40
   6   0 -10   71.49   10.80
   6   0 -10   62.59    9.40
  -6   0  10   64.69   10.60
  -6   0  10   72.49    9.10
  -6   0  10   72.39   11.10
  -6   0   9    0.90    7.20
   6   0  -9    2.90    8.50
   6   0  -9    5.60    6.50
   6   0  -9    4.40    6.80
  -6   0   9    2.00    5.50
  -6   0   9    6.10    6.70
   6   0  -8  395.56   18.00
  -6   0   8  378.96   16.70
   6   0  -8  386.76   17.70
  -6   0   8  423.66   17.20
   6   0  -8  413.76   21.70
  -6   0   8  410.06   20.80
  -6   0   7    3.20    5.00
   6   0  -7   -4.60    5.60
   6   0  -7    2.40    4.90
  -6   0   7    1.30    4.50
   6   0  -7    1.60    5.00
  -6   0   7    3.90    6.50
   6   0  -7    2.70    7.50
   6   0  -6  621.04   21.80
   6   0  -6  641.64   25.40
  -6   0   6  611.74   24.60
   6   0  -6  633.24   20.20
   6   0  -6  631.64   22.40
  -6   0   6  614.34   19.10
  -6   0   6  658.23   22.20
   6   0  -5   -7.00    6.40
  -6   0   5    0.10    6.10
   6   0  -5    1.80    5.60
   6   0  -5    1.40    5.30
   6   0  -5   -0.80    3.40
  -6   0   5   -3.00    4.70
   6   0  -4   20.20    6.00
  -6   0   4    6.30    3.50
   6   0  -4   21.30    6.40
  -6   0   4   25.20    6.30
   6   0  -4   20.40    7.60
  -6   0   3   -3.80    5.60
   6   0  -3    1.30    5.40
  -6   0   3   -7.80    5.10
   6   0  -3    4.60    5.30
   6   0  -3   -1.70    6.20
   6   0  -2  886.21   23.10
   6   0  -2  910.21   29.00
  -6   0   2  881.91   29.30
  -6   0   2  914.41   29.30
   6   0  -2  864.21   28.90
   6   0  -2  867.41   29.40
  -6   0   1    4.20    5.70
   6   0  -1    1.10    3.70
   6   0  -1    0.10    6.40
  -6   0   1   -3.40    6.20
   6   0  -1    6.10    6.30
   6   0  -1   -1.10    5.70
   6   0   0 4072.99  103.49
  -6   0   0 3966.40  101.59
   6   0   0 3875.41  101.69
  -6   0   0 3815.72  103.09
   6   0   0 3945.01   97.69
   6   0   1    9.60    6.30
  -6   0  -1   -3.40    4.70
   6   0   1    0.00    5.30
   6   0   1    2.50    5.30
  -6   0  -1    2.70    6.50
  -6   0  -2   10.70    7.50
   6   0   2   16.10    6.70
   6   0   2   17.90    6.80
  -6   0  -2   16.60    5.00
   6   0   2   16.50    5.40
   6   0   3    0.00    4.60
  -6   0  -3    1.20    7.10
   6   0   3    6.10    6.80
   6   0   3    3.70    6.70
  -6   0  -3    1.40    4.30
  -6   0  -4  609.04   25.80
   6   0   4  588.64   24.30
   6   0   4  539.15   18.40
  -6   0  -4  554.54   18.20
   6   0   4  514.65   23.60
   6   0   5   -1.30    3.70
  -6   0  -5   -4.90    8.60
   6   0   5    1.00    8.40
  -6   0  -6  218.98   18.30
   6   0   6  254.77   19.90
   6   0   7   13.60   10.50
  -6   0  -7   17.00   10.20
   6   0   8   95.69   15.70
  -6   0  -8   56.49   12.90
  -6   0  -9    3.60   10.60
   6   0   9    0.40   11.70
  -6   0 -10   -3.10   11.10
   6   0  10   -2.50   12.20
  -6   0 -11   10.20   11.80
   6   0  11    2.50   13.10
   6   1 -15   -3.80    6.40
   6   1 -15    5.50   10.00
  -6   1  15   13.10   12.50
   6  -1 -15    8.60   11.40
  -6  -1  15   -6.10   11.40
   6  -1 -15   -1.00    9.10
   6   1 -14   37.30   11.20
   6   1 -14   26.70    7.70
  -6   1  14   38.90   12.50
   6  -1 -14   18.90   11.00
   6  -1 -14   25.20    9.90
  -6  -1  14   23.20   12.10
   6   1 -13    8.60    9.50
   6   1 -13   10.60    6.70
  -6   1  13   -8.60    9.70
   6  -1 -13   22.60    9.50
   6  -1 -13    2.90    9.40
  -6  -1  13   13.10   10.80
   6   1 -12  380.56   23.30
  -6   1  12  375.16   22.30
   6   1 -12  367.56   16.90
  -6  -1  12  352.86   22.40
   6  -1 -12  339.77   22.20
  -6  -1  12  377.06   15.50
   6  -1 -12  349.37   20.40
   6   1 -11   23.20    9.60
   6   1 -11   13.50    9.70
   6   1 -11   12.00    6.30
  -6   1  11   16.70    9.30
  -6  -1  11   13.50    5.30
   6  -1 -11    7.00    9.50
   6  -1 -11   14.00    8.50
  -6  -1  11   16.30    9.00
   6   1 -10  279.67   18.00
   6   1 -10  295.87   14.60
  -6   1  10  300.37   19.30
  -6   1  10  271.37   17.70
   6   1 -10  311.47   20.70
  -6  -1  10  315.07   13.70
  -6  -1  10  333.27   19.00
   6  -1 -10  275.77   20.30
   6  -1 -10  310.97   18.60
   6  -1 -10  306.77   20.40
  -6  -1  10  292.37   18.80
  -6   1   9   28.40    7.90
   6   1  -9   25.20    5.80
   6   1  -9   25.90    7.70
  -6   1   9   23.40    8.10
  -6   1   9   33.50    7.80
   6   1  -9   20.20    6.40
   6   1  -9   33.20   10.10
   6  -1  -9   31.50    8.50
  -6  -1   9   26.20    5.70
   6  -1  -9   39.60   10.10
  -6  -1   9   25.00    8.00
  -6  -1   9   23.80    8.40
   6  -1  -9   46.70    9.60
  -6   1   8    7.70    7.10
   6   1  -8   -3.30    4.30
  -6   1   8    6.60    5.60
  -6   1   8   -9.20    5.80
   6   1  -8    0.60    5.70
   6   1  -8   -4.20    7.80
   6   1  -8    2.30    5.10
  -6  -1   8    7.00    7.00
  -6  -1   8   -0.60    4.50
   6  -1  -8   -9.60    7.50
  -6  -1   8    2.70    6.10
   6  -1  -8   -2.90    6.50
   6  -1  -8    1.10    6.40
   6   1  -7   33.10    5.90
   6   1  -7   34.30    9.30
   6   1  -7   31.60    6.20
  -6   1   7   34.10    7.40
  -6   1   7   31.40    5.80
  -6   1   7   41.90    9.20
   6   1  -7   38.40    6.30
   6  -1  -7   44.00    9.70
  -6  -1   7   35.20    6.40
   6  -1  -7   27.70    7.50
  -6  -1   7   34.80    8.50
  -6  -1   7   38.50    5.90
   6  -1  -7   30.70    6.90
   6   1  -6  265.27   11.60
   6   1  -6  258.47   16.60
  -6   1   6  261.77   15.60
   6   1  -6  225.48   12.30
  -6   1   6  235.38   13.90
  -6   1   6  230.58   10.10
   6   1  -6  209.68   11.60
   6  -1  -6  240.48   12.60
  -6  -1   6  267.07   15.80
   6  -1  -6  244.98   14.80
   6  -1  -6  254.67   16.50
   6   1  -5  166.78   11.10
  -6   1   5  116.79   11.30
   6   1  -5  143.79    8.40
   6   1  -5  179.38   14.30
   6   1  -5  170.38    7.50
  -6   1   5  159.88    6.50
   6   1  -5  156.98   10.50
  -6   1   5  162.78   11.80
  -6  -1   5  174.88   13.60
   6  -1  -5  157.38   12.40
   6  -1  -5  157.48    9.50
   6  -1  -5  156.98   13.10
   6  -1  -5  154.38   11.70
  -6   1   4  665.93   23.30
  -6   1   4  604.94   18.60
   6   1  -4  666.43   22.00
   6   1  -4  643.94   18.50
  -6   1   4  606.24   23.60
   6   1  -4  623.24   21.90
   6   1  -4  613.44   23.90
   6  -1  -4  631.44   18.70
  -6  -1   4  681.03   22.10
   6  -1  -4  657.53   23.70
   6  -1  -4  634.74   24.80
   6  -1  -4  620.44   22.90
  -6   1   3  272.07   10.30
   6   1  -3  289.17   13.70
   6   1  -3  294.67   14.10
   6   1  -3  282.57   15.60
  -6  -1   3  263.47   15.10
   6  -1  -3  244.08   14.60
   6  -1  -3  255.57   15.80
  -6  -1   3  293.17   14.00
   6  -1  -3  265.47    9.50
   6  -1  -3  268.97   14.50
   6   1  -2 1864.71   53.79
  -6   1   2 1829.02   53.69
  -6   1   2 1886.91   54.19
   6   1  -2 1981.20   53.49
  -6   1   2 1939.81   54.19
  -6   1   2 1893.71   49.10
   6  -1  -2 1915.01   53.69
  -6  -1   2 1973.00   54.09
   6  -1  -2 1881.11   53.89
   6  -1  -2 1887.31   54.19
  -6  -1   2 1908.11   53.19
  -6   1   1    2.10    3.80
   6   1  -1    3.30    5.20
  -6   1   1    1.60    5.90
  -6   1   1    7.70    6.80
   6   1  -1   16.50    6.30
   6  -1  -1   12.10    6.90
  -6  -1   1    5.90    6.70
   6  -1  -1    8.20    3.60
  -6  -1   1   16.50    3.90
   6  -1  -1   12.60    6.60
  -6  -1   1   16.00    6.20
   6  -1  -1    3.90    5.90
   6   1   0 1265.47   39.20
  -6   1   0 1349.56   40.00
  -6   1   0 1295.87   38.10
  -6   1   0 1272.97   35.90
   6   1   0 1233.88   37.60
  -6  -1   0 1291.87   35.50
  -6  -1   0 1236.48   39.20
   6  -1   0 1249.88   39.20
   6  -1   0 1304.47   39.40
  -6  -1   0 1234.08   37.60
   6  -1   0 1230.78   34.70
   6  -1   0 1281.07   38.20
  -6   1  -1   72.79    8.00
   6   1   1   80.89    8.20
   6   1   1   71.79    9.60
  -6   1  -1   52.79    8.90
   6  -1   1   85.19    8.20
   6  -1   1   79.99    9.80
  -6  -1  -1   67.29    9.30
  -6  -1  -1   77.29    7.70
   6  -1   1   78.29    8.60
  -6  -1  -1   73.89    7.60
   6  -1   1  117.79   12.10
   6   1   2 2316.47   66.19
  -6   1  -2 2365.36   62.79
   6   1   2 2280.57   63.19
  -6   1  -2 2368.06   66.49
   6   1   2 2313.57   62.19
  -6  -1  -2 2394.66   64.39
  -6  -1  -2 2334.37   62.19
   6  -1   2 2377.56   66.09
   6  -1   2 2376.96   66.69
  -6  -1  -2 2289.97   66.49
   6  -1   2 2321.67   62.89
   6  -1   2 2356.96   62.99
  -6   1  -3  203.78   16.10
   6   1   3  220.28   11.30
  -6   1  -3  201.38   11.50
   6   1   3  200.18   15.50
   6   1   3  216.18   15.30
   6  -1   3  201.48   12.10
   6  -1   3  196.58   14.40
  -6  -1  -3  207.98   16.30
   6   1   4  656.23   26.70
   6   1   4  618.24   19.60
  -6   1  -4  632.34   20.50
   6   1   4  581.94   25.50
  -6   1  -4  539.15   25.70
   6  -1   4  611.64   25.40
   6  -1   4  648.04   21.00
  -6  -1  -4  588.94   26.70
   6   1   5   36.00   10.80
   6   1   5   41.80    4.90
  -6   1  -5   51.29    5.70
  -6   1  -5   49.30   10.70
  -6  -1  -5   27.50   10.20
   6  -1   5   32.60   10.60
  -6   1  -6    1.90    9.00
  -6   1  -6    2.80    3.40
   6   1   6    1.40    9.70
  -6  -1  -6    8.90   10.20
   6  -1   6   -4.00    9.60
   6   1   7   15.00   10.90
  -6   1  -7   -9.60    9.00
  -6  -1  -7    5.20   10.40
   6  -1   7   22.60   11.20
   6   1   8  170.48   18.10
  -6   1  -8  210.78   18.90
   6  -1   8  129.19   16.80
  -6  -1  -8  151.08   18.20
   6   1   9  -12.00   11.30
  -6   1  -9   -5.20   10.20
   6  -1   9    2.60   12.10
  -6  -1  -9    7.40   11.20
   6   1  10  180.08   21.60
  -6   1 -10  188.48   20.00
   6  -1  10  204.28   22.20
  -6  -1 -10  217.48   22.10
  -6   1 -11    5.60   12.10
   6   1  11   -7.30   13.50
   6  -1  11   20.60   14.30
  -6  -1 -11    5.20   11.90
  -6   2  15   16.20   12.60
   6   2 -15   -1.20    9.60
   6  -2 -15    9.80   10.50
  -6  -2  15   -7.30   12.30
   6   2 -14  116.69    8.90
   6   2 -14  126.49   16.00
  -6   2  14  124.09   16.90
  -6  -2  14  125.29   17.60
   6  -2 -14  119.09   15.00
   6  -2 -14  118.39   15.30
   6   2 -13  100.99   14.10
   6   2 -13  109.19    8.80
  -6   2  13   82.69   14.20
   6  -2 -13  100.69   14.40
   6  -2 -13  101.79   14.00
  -6  -2  13   89.19   14.80
   6   2 -12   57.09   12.10
   6   2 -12   62.59    6.40
  -6   2  12   47.10   11.60
   6   2 -12   62.29    6.60
   6  -2 -12   31.90   11.10
  -6  -2  12   80.29   13.50
   6  -2 -12   62.49   12.00
   6   2 -11   80.89    7.10
   6   2 -11   68.59    6.60
   6   2 -11   73.69   13.10
  -6   2  11   84.69   12.40
  -6  -2  11   86.69   13.10
   6  -2 -11   79.39   12.90
   6  -2 -11   82.19   12.20
  -6   2  10  100.29   12.40
   6   2 -10  103.09    8.10
   6   2 -10   96.39   12.40
   6   2 -10   86.29   12.90
   6   2 -10   85.89    7.40
  -6   2  10  114.09   12.40
  -6  -2  10  112.39   13.20
   6  -2 -10   87.19   12.50
   6  -2 -10  101.49   13.10
   6  -2 -10  109.29   13.90
  -6   2   9  185.38   14.00
  -6   2   9  167.48   15.10
   6   2  -9  194.58   14.80
   6   2  -9  160.98    9.50
   6   2  -9  165.38    9.70
   6   2  -9  184.38   16.70
   6  -2  -9  180.68   15.20
   6  -2  -9  192.08   16.40
   6  -2  -9  191.78   15.20
  -6  -2   9  171.68   13.90
   6   2  -8  314.27   12.50
  -6   2   8  300.57   15.20
   6   2  -8  296.57   12.70
   6   2  -8  318.57   16.30
  -6   2   8  305.27   17.50
   6   2  -8  309.67   19.90
  -6   2   8  306.57   18.40
   6  -2  -8  321.87   19.90
   6  -2  -8  343.67   19.00
   6  -2  -8  304.37   18.20
  -6   2   7  320.97   18.20
  -6   2   7  292.77   13.70
   6   2  -7  321.87   14.50
   6   2  -7  284.37   18.80
   6   2  -7  303.87   12.50
   6   2  -7  290.47   14.70
  -6   2   7  317.97   17.00
   6   2  -7  318.67   13.00
   6  -2  -7  285.37   18.70
   6  -2  -7  357.26   17.40
   6  -2  -7  291.27   17.90
  -6   2   6 1067.59   36.50
   6   2  -6 1074.59   31.30
   6   2  -6 1092.89   31.50
  -6   2   6 1059.09   33.00
   6   2  -6 1080.79   32.10
  -6   2   6 1106.49   35.60
   6   2  -6 1085.99   31.20
  -6   2   6 1086.49   30.30
   6   2  -6 1088.99   37.10
   6  -2  -6 1124.49   33.60
   6  -2  -6 1083.79   35.60
  -6  -2   6 1102.09   36.60
   6  -2  -6 1059.89   36.90
  -6   2   5   87.89    8.20
   6   2  -5   79.39    7.40
   6   2  -5   75.49    6.20
  -6   2   5  109.09   10.80
  -6   2   5   99.09   11.60
   6   2  -5   98.59    8.10
   6   2  -5   75.09    7.60
   6   2  -5   89.39   11.10
   6  -2  -5   90.79    8.10
   6  -2  -5   55.39    9.40
  -6  -2   5   82.39    7.60
  -6  -2   5   76.09    9.50
   6  -2  -5   76.89   10.10
   6   2  -4  392.06   19.40
   6   2  -4  398.66   16.00
  -6   2   4  373.26   18.50
  -6   2   4  363.96   15.30
   6   2  -4  377.76   15.80
   6   2  -4  387.66   13.00
  -6  -2   4  411.96   15.70
   6  -2  -4  359.26   18.10
   6  -2  -4  377.46   14.60
   6  -2  -4  337.07   18.80
   6  -2  -4  404.66   18.00
   6   2  -3    9.40    3.80
   6   2  -3    9.40    5.80
  -6   2   3    9.60    5.30
  -6   2   3    6.80    6.60
  -6   2   3   13.50    6.30
   6   2  -3   13.70    7.40
  -6   2   3   14.90    2.90
   6  -2  -3   19.20    7.00
  -6  -2   3   10.30    3.20
   6  -2  -3   15.20    7.00
  -6  -2   3   22.50    6.20
   6  -2  -3   18.90    4.70
   6  -2  -3   11.60    7.50
  -6  -2   3   15.00    6.60
  -6   2   2 2237.08   55.29
   6   2  -2 2150.48   56.69
   6   2  -2 2194.98   62.19
  -6   2   2 2236.08   62.49
  -6   2   2 2226.48   58.79
  -6   2   2 2184.38   62.49
   6   2  -2 2273.17   61.09
   6  -2  -2 2200.58   62.29
  -6  -2   2 2283.87   56.99
   6  -2  -2 2337.67   62.49
  -6  -2   2 2199.68   60.69
  -6  -2   2 2241.18   62.09
   6  -2  -2 2205.18   62.59
   6  -2  -2 2177.28   58.19
  -6   2   1 1271.07   40.10
   6   2  -1 1297.47   39.20
  -6   2   1 1340.97   40.40
  -6   2   1 1254.57   36.40
  -6   2   1 1273.87   39.40
  -6   2   1 1294.87   34.30
   6   2  -1 1286.87   39.10
   6  -2  -1 1244.48   39.70
   6  -2  -1 1303.57   40.10
  -6  -2   1 1290.17   35.60
  -6  -2   1 1283.67   39.00
   6  -2  -1 1205.78   39.10
  -6   2   0 2662.13   69.79
  -6   2   0 2734.33   72.59
   6   2   0 2763.62   74.89
  -6   2   0 2666.63   74.79
  -6   2   0 2790.52   74.29
   6   2   0 2735.03   73.59
   6  -2   0 2665.03   69.79
   6  -2   0 2778.22   75.29
  -6  -2   0 2816.82   75.19
   6  -2   0 2726.53   74.29
   6  -2   0 2757.82   74.89
  -6  -2   0 2781.12   71.79
  -6   2  -1  234.08   13.80
  -6   2  -1  226.98   15.80
   6   2   1  240.48   13.50
  -6   2  -1  266.37   14.50
   6   2   1  219.18   15.10
   6  -2   1  245.78   14.80
   6  -2   1  237.08   14.70
   6  -2   1  239.38   15.50
   6  -2   1  245.28   13.10
  -6  -2  -1  213.78   15.80
  -6   2  -2   10.50    6.00
  -6   2  -2   23.70    8.20
   6   2   2   38.80    8.90
  -6   2  -2   11.00    5.90
   6   2   2    8.60    5.20
   6  -2   2   10.90    7.60
   6  -2   2    1.00    3.30
  -6  -2  -2   13.80    6.70
  -6  -2  -2   14.60    7.90
   6  -2   2   16.90    6.90
   6  -2   2   24.90    6.90
  -6   2  -3  315.67   18.80
  -6   2  -3  287.17   17.20
  -6   2  -3  356.96   15.90
   6   2   3  328.57   14.20
   6   2   3  363.56   19.50
   6  -2   3  342.47   17.30
   6  -2   3  319.87   18.60
   6  -2   3  312.77   15.90
  -6  -2  -3  317.27   18.20
   6  -2   3  308.97   17.60
  -6  -2  -3  319.07   19.70
   6   2   4  426.16   16.20
  -6   2  -4  434.66   17.80
  -6   2  -4  438.86   22.30
  -6   2  -4  445.36   21.70
  -6  -2  -4  423.66   22.20
  -6  -2  -4  439.46   22.40
   6  -2   4  463.05   22.30
   6  -2   4  410.06   21.70
  -6   2  -5  345.97   21.20
   6   2   5  375.06   22.10
  -6   2  -5  370.06   15.90
   6   2   5  376.16   13.80
   6  -2   5  414.76   22.00
  -6  -2  -5  390.36   22.10
  -6  -2  -5  353.96   22.70
   6  -2   5  325.87   21.20
  -6   2  -6  262.47   12.50
  -6   2  -6  256.97   19.50
   6   2   6  231.18   19.80
  -6  -2  -6  279.27   22.30
   6  -2   6  264.57   19.80
   6  -2   6  249.48   20.10
   6   2   7  356.66   24.60
  -6   2  -7  373.86   23.50
  -6   2  -7  351.06   13.30
   6  -2   7  401.36   24.50
   6  -2   7  372.06   22.80
  -6  -2  -7  349.57   24.00
   6   2   8    5.50   11.30
  -6   2  -8   17.60   10.20
  -6  -2  -8    1.10   10.30
   6  -2   8    8.60   11.00
   6  -2   8    8.40    9.70
  -6   2  -9   90.59   14.90
   6   2   9  117.59   18.50
   6  -2   9  105.19   14.80
  -6  -2  -9  127.09   17.80
   6  -2   9  121.89   18.00
   6   2  10   -2.70   12.60
  -6   2 -10    1.10   10.50
  -6  -2 -10   14.00   13.00
   6  -2  10   -1.70   12.30
   6   2  11   33.90   15.90
  -6   2 -11   33.80   12.90
   6  -2  11   45.90   15.80
  -6  -2 -11   26.80   13.70
  -6   3  15   40.70   13.90
   6   3 -15   26.10   11.50
  -6  -3  15   33.40   14.90
  -6   3  14   13.80   11.70
   6   3 -14    6.80   10.40
   6  -3 -14    5.90   10.80
   6  -3 -14    8.50   10.40
  -6  -3  14   21.50   13.40
  -6   3  13   95.99   14.90
   6   3 -13  107.99   15.00
  -6  -3  13  116.69   16.80
   6  -3 -13  111.89   15.40
   6  -3 -13   85.59   13.70
   6   3 -12   13.60    9.70
  -6   3  12   18.60   10.30
  -6  -3  12   13.60   11.10
   6  -3 -12   28.50   10.80
   6  -3 -12    5.30    9.90
   6   3 -11  157.68   17.40
  -6   3  11  154.08   15.60
   6  -3 -11  178.28   17.80
   6  -3 -11  132.49   15.30
  -6   3  10   58.99   11.00
   6   3 -10   50.99   12.20
   6   3 -10   56.19   10.70
   6  -3 -10   65.49   12.10
   6  -3 -10   70.19   12.60
   6   3  -9   40.90    8.60
  -6   3   9   29.90    8.50
   6   3  -9   12.00   10.20
  -6   3   9   36.50   10.20
   6   3  -9   34.30    9.20
   6  -3  -9   36.30   10.90
   6  -3  -9   43.00   11.10
   6  -3  -9    8.30   10.10
   6   3  -8   82.39    6.50
   6   3  -8   81.29    9.80
   6   3  -8   81.39   13.00
  -6   3   8   97.29   12.80
   6   3  -8   97.29   11.00
  -6   3   8   67.39    9.10
   6   3  -8   86.59    6.60
   6  -3  -8   66.19   11.20
   6  -3  -8   79.49   12.60
   6  -3  -8   87.19   11.90
   6   3  -7   26.00    4.80
   6   3  -7   31.60    9.60
   6   3  -7   29.40    5.00
  -6   3   7   48.70   10.40
  -6   3   7   18.00    8.00
  -6   3   7   15.90    7.80
   6   3  -7   33.50    7.70
   6   3  -7   25.60    6.80
   6  -3  -7   17.60    8.80
   6  -3  -7   33.00   10.00
   6  -3  -7   20.30    8.20
   6   3  -6    7.70    8.90
  -6   3   6   -0.30    1.80
  -6   3   6    3.50    6.90
   6   3  -6    6.50    6.00
   6   3  -6    5.40    5.30
   6   3  -6    6.90    4.40
  -6   3   6    5.70    7.10
   6   3  -6    3.90    4.40
   6  -3  -6    1.10    6.60
   6  -3  -6   12.00    8.70
   6  -3  -6   -2.40    7.00
   6   3  -5 1188.48   34.40
  -6   3   5 1215.18   39.10
  -6   3   5 1167.28   39.60
   6   3  -5 1243.08   40.50
   6   3  -5 1188.68   34.50
   6   3  -5 1167.68   34.10
   6   3  -5 1251.07   35.60
  -6   3   5 1172.78   36.60
   6  -3  -5 1198.28   36.40
  -6  -3   5 1177.88   33.80
   6  -3  -5 1188.78   40.20
   6  -3  -5 1151.78   39.00
  -6   3   4  168.38   14.10
   6   3  -4  176.58   11.00
   6   3  -4  132.29   12.90
  -6   3   4  181.98   14.60
  -6   3   4  147.29   11.40
   6   3  -4  159.38   10.30
   6  -3  -4  170.28   11.70
   6  -3  -4  159.38   13.60
  -6  -3   4  178.38   10.90
   6  -3  -4  135.19   13.00
   6   3  -3 2014.30   54.79
  -6   3   3 1935.11   54.99
  -6   3   3 1988.00   58.19
  -6   3   3 1984.20   57.69
   6   3  -3 1970.00   52.99
   6   3  -3 2063.79   58.29
   6  -3  -3 1913.81   57.19
  -6  -3   3 1988.70   52.49
   6  -3  -3 2015.40   54.29
   6  -3  -3 2008.40   57.39
  -6  -3   3 1951.30   54.49
   6  -3  -3 1928.91   58.09
   6   3  -2  112.69   11.60
   6   3  -2   96.89    9.70
  -6   3   2   75.39    8.70
   6   3  -2  103.39    8.30
  -6   3   2   99.39    7.30
  -6   3   2   82.29   10.40
  -6   3   2  102.19   11.70
   6  -3  -2   86.49    9.70
  -6  -3   2  107.49    9.90
   6  -3  -2   88.99   11.60
  -6  -3   2   97.09    7.90
   6  -3  -2   89.29   10.70
   6  -3  -2  100.79    8.70
   6   3  -1   44.70    8.00
  -6   3   1   38.30    8.60
  -6   3   1   37.70    8.80
  -6   3   1   48.00    6.20
  -6   3   1   42.80    7.40
   6   3  -1   44.20    6.70
   6   3  -1   57.09    8.80
   6  -3  -1   42.80    9.10
  -6  -3   1   44.20    8.30
  -6  -3   1   47.80    6.50
   6  -3  -1   48.40    6.90
   6  -3  -1   49.20    9.30
   6  -3  -1   61.19   10.00
  -6   3   0  100.29    9.80
   6   3   0  105.59    9.50
   6   3   0  103.99   11.10
  -6   3   0   97.69   11.00
   6   3   0   86.19    9.90
  -6   3   0  105.89   11.60
   6  -3   0   81.39   10.30
  -6  -3   0   82.19   10.00
   6  -3   0  125.79   12.00
   6  -3   0  103.69   11.40
   6   3   1 1023.20   33.10
  -6   3  -1 1028.40   32.00
   6   3   1 1057.69   35.50
  -6   3  -1 1049.20   34.50
  -6   3  -1  979.40   34.90
  -6   3  -1 1028.00   34.00
  -6  -3  -1 1044.40   35.70
  -6  -3  -1 1075.79   33.70
   6  -3   1 1033.90   32.10
   6  -3   1 1117.19   34.90
   6  -3   1  899.01   33.00
   6  -3   1 1059.29   35.30
  -6   3  -2  552.54   23.00
  -6   3  -2  514.05   22.10
  -6   3  -2  518.25   21.40
   6   3   2  560.74   24.50
   6   3   2  532.35   20.90
  -6   3  -2  523.15   23.20
   6  -3   2  522.35   21.60
  -6  -3  -2  519.25   22.70
  -6  -3  -2  569.34   24.90
   6  -3   2  492.65   23.20
   6  -3   2  531.95   22.80
   6  -3   2  561.94   22.40
   6   3   3 1151.68   39.40
  -6   3  -3 1114.39   35.60
  -6   3  -3 1041.00   37.30
   6   3   3 1128.49   34.00
  -6   3  -3 1070.79   37.90
  -6   3  -3 1179.68   36.90
   6  -3   3 1081.79   36.20
  -6  -3  -3 1055.79   38.90
   6  -3   3 1072.19   35.50
  -6  -3  -3 1092.29   37.40
   6  -3   3 1129.89   37.80
   6   3   4   89.99    8.70
  -6   3  -4   85.49   11.20
  -6   3  -4   85.69   12.30
  -6   3  -4   78.89   12.10
  -6   3  -4   97.99   10.40
  -6  -3  -4   88.79   13.80
   6  -3   4  109.39   12.70
  -6  -3  -4  113.19   13.20
   6  -3   4   89.69   12.40
  -6   3  -5   95.09   10.20
   6   3   5  109.69    8.50
  -6   3  -5   99.39   13.10
  -6  -3  -5  109.39   14.90
   6  -3   5  136.59   14.60
   6  -3   5  120.79   13.90
   6   3   6   68.89    6.30
   6   3   6   59.79   13.70
  -6   3  -6   59.89    8.70
  -6   3  -6   67.59   12.30
   6  -3   6   61.59   11.80
  -6  -3  -6   90.09   15.20
   6  -3   6   74.39   13.20
  -6   3  -7  110.19    9.60
   6   3   7  120.89   16.20
  -6   3  -7  115.19   14.80
   6  -3   7  127.49   16.40
   6  -3   7  119.99   14.80
  -6  -3  -7  125.29   16.90
   6   3   8   19.10   13.00
  -6   3  -8    3.20   10.00
   6  -3   8    9.70   11.60
  -6  -3  -8   17.30   12.50
   6  -3   8   27.60   10.60
  -6   3  -9  194.98   18.90
   6   3   9  165.38   20.70
   6  -3   9  180.68   21.10
  -6  -3  -9  148.89   19.80
   6   3  10   31.70   14.70
  -6   3 -10   23.40   11.40
   6  -3  10   37.80   14.50
  -6  -3 -10   21.00   13.50
   6   4 -14   13.80   11.00
  -6   4  14   15.70   12.20
   6   4 -14   17.30   11.30
   6  -4 -14   -4.10   10.20
   6  -4 -14   -2.50   11.40
   6   4 -13   99.99   15.10
  -6   4  13  121.19   16.70
   6   4 -13   93.59   15.00
   6  -4 -13  113.59   16.60
   6  -4 -13  114.29   16.10
   6   4 -12   -9.20    9.70
  -6   4  12    4.40   10.10
   6   4 -12   13.00    9.60
   6  -4 -12   -0.10   10.20
   6  -4 -12   11.10   11.10
   6   4 -11    5.50   10.40
  -6   4  11   20.90   10.10
   6   4 -11   17.20    9.20
   6  -4 -11   21.90   10.90
   6  -4 -11   10.20   10.90
  -6   4  10    7.90    8.90
   6   4 -10    1.20    8.10
   6   4 -10   13.40   10.70
   6  -4 -10   17.00   10.70
   6  -4 -10   15.10   10.60
   6   4  -9   75.49   14.10
   6   4  -9   99.39   12.10
   6  -4  -9   77.69   13.70
   6  -4  -9   71.09   12.90
   6   4  -8    2.30    7.50
  -6   4   8    8.90    9.00
   6   4  -8    8.10    7.40
   6   4  -8    3.60    9.70
   6  -4  -8    6.00    9.40
   6  -4  -8   -4.50    9.30
   6  -4  -8   12.20    9.20
   6   4  -7   92.89    6.90
   6   4  -7   89.19   10.20
  -6   4   7   98.59   12.10
   6   4  -7   93.39   11.40
   6   4  -7  117.49   14.70
   6   4  -7   95.79    7.20
   6  -4  -7  117.29   14.70
   6  -4  -7  106.19   13.40
   6  -4  -7   88.79   12.00
   6   4  -6    1.50    4.20
   6   4  -6   -1.70    8.40
   6   4  -6    7.80    6.80
  -6   4   6    0.00    8.10
   6   4  -6    8.50    4.70
  -6   4   6    4.00    8.20
   6   4  -6   -0.30    6.20
  -6   4   6   -2.90    8.50
  -6  -4   6   -4.60    3.70
   6  -4  -6   10.70    9.40
   6  -4  -6   -2.20    8.70
   6  -4  -6   11.70    7.60
  -6   4   5   26.60    8.70
   6   4  -5   33.50    9.90
  -6   4   5   30.80    9.80
   6   4  -5   25.50    7.60
   6   4  -5   30.30    7.40
  -6   4   5   32.50   10.10
   6   4  -5   28.70    5.80
   6  -4  -5   32.80   10.00
  -6  -4   5   29.50    5.80
   6  -4  -5    0.80    8.00
   6  -4  -5   21.30    7.50
  -6   4   4  435.56   21.50
   6   4  -4  460.85   18.10
  -6   4   4  423.56   21.60
  -6   4   4  447.96   22.40
   6   4  -4  437.76   22.70
   6   4  -4  465.55   19.10
   6  -4  -4  469.15   24.20
   6  -4  -4  448.56   22.60
  -6  -4   4  496.95   18.00
   6  -4  -4  447.56   19.90
  -6   4   3  258.77   16.80
  -6   4   3  252.37   16.60
   6   4  -3  261.47   14.90
  -6   4   3  254.07   17.40
   6   4  -3  265.27   14.20
   6   4  -3  254.57   17.60
   6  -4  -3  215.38   17.00
  -6  -4   3  256.07   14.00
   6  -4  -3  275.17   15.00
   6  -4  -3  257.27   17.70
   6   4  -2   44.40    7.90
   6   4  -2   38.70    9.40
  -6   4   2   44.70    9.70
  -6   4   2   40.10    8.60
  -6   4   2   42.00    9.20
   6   4  -2   42.10    8.00
   6  -4  -2   35.80   10.60
   6  -4  -2   48.00    9.10
  -6  -4   2   46.60    8.10
   6  -4  -2   52.89    9.30
   6  -4  -2   53.19    8.20
   6   4  -1 1964.90   55.69
  -6   4   1 1941.11   57.09
  -6   4   1 1871.31   55.19
   6   4  -1 1903.31   53.79
  -6   4   1 1980.50   57.79
   6   4  -1 1863.31   56.29
  -6   4   1 1720.83   51.39
   6  -4  -1 1895.91   57.49
  -6  -4   1 1999.70   54.19
   6  -4  -1 1887.41   54.69
  -6  -4   1 1973.20   55.49
   6  -4  -1 1946.71   56.69
   6  -4  -1 1891.61   56.79
   6   4   0   48.50    8.70
  -6   4   0   40.60    7.50
  -6   4   0   63.29   10.60
   6   4   0   70.29    9.80
  -6   4   0   31.40    9.00
   6   4   0   61.19    9.50
  -6   4   0   60.39    9.60
   6  -4   0   40.90   10.20
  -6  -4   0   48.30    8.70
   6  -4   0   53.99   10.50
   6  -4   0   51.19    8.70
  -6  -4   0   52.79    9.70
  -6   4  -1  340.77   19.70
  -6   4  -1  318.67   19.10
   6   4   1  345.77   18.70
  -6   4  -1  365.76   17.30
   6   4   1  363.86   18.50
   6   4   1  359.76   19.30
  -6   4  -1  326.57   19.50
  -6  -4  -1  329.97   19.50
   6  -4   1  370.76   20.10
  -6  -4  -1  345.97   18.90
   6  -4   1  330.17   19.20
  -6   4  -2  142.79   12.60
   6   4   2  113.79   11.30
  -6   4  -2  137.39   13.70
  -6   4  -2  128.29   12.70
   6   4   2  121.69   14.20
  -6  -4  -2  135.49   14.70
   6  -4   2  118.29   13.00
  -6  -4  -2  113.59   12.70
  -6   4  -3   68.69   10.60
  -6   4  -3   77.99   11.90
   6   4   3   69.69    9.20
   6   4   3   67.19   11.80
  -6   4  -3   87.59   11.40
   6  -4   3   86.09   11.90
  -6  -4  -3   79.09   13.40
  -6  -4  -3   69.99   12.00
   6  -4   3   75.39   11.30
   6   4   4   76.29    9.20
  -6   4  -4   88.59   13.60
  -6   4  -4   70.59   11.60
  -6   4  -4   54.09   10.10
   6  -4   4   70.99   11.90
  -6  -4  -4   50.79   13.20
   6  -4   4   59.99   11.10
  -6   4  -5  531.45   25.80
   6   4   5  483.95   19.90
  -6   4  -5  510.35   23.20
  -6   4  -5  493.65   28.00
   6  -4   5  494.45   25.80
   6  -4   5  512.35   25.20
  -6  -4  -5  520.25   28.60
  -6   4  -6   56.19   13.30
  -6   4  -6   63.09   12.30
   6   4   6   52.29    7.30
  -6   4  -6   60.39    9.70
   6  -4   6   55.09   12.90
  -6  -4  -6   42.30   13.30
   6  -4   6   73.29   12.00
  -6   4  -7  191.28   20.60
   6   4   7  162.78    9.70
  -6   4  -7  125.79   15.30
  -6   4  -7  183.98   13.90
   6  -4   7  195.88   19.60
   6  -4   7  174.08   16.80
  -6  -4  -7  195.68   20.30
  -6   4  -8   16.40   13.30
   6   4   8    2.40   12.10
  -6   4  -8    1.50    9.30
   6  -4   8   32.60   13.20
  -6  -4  -8    3.20   11.80
  -6   4  -9   53.09   13.00
   6   4   9   37.80   15.30
  -6  -4  -9   55.59   16.10
   6  -4   9   40.10   14.30
  -6   4 -10   -2.10    9.70
   6   4  10   15.00   14.10
  -6  -4 -10   19.70   14.00
   6  -4  10   24.90   13.80
   6   5 -14   12.20   11.40
  -6   5  14    3.90   11.80
   6   5 -13   21.40   11.70
  -6   5  13   19.70   12.60
   6   5 -13   17.30   11.90
   6  -5 -13   27.20   13.20
   6  -5 -13   20.10   12.00
   6   5 -12   10.00   11.50
   6   5 -12   22.70   11.70
  -6   5  12    5.80   11.10
   6  -5 -12   22.30   12.70
   6  -5 -12   18.00   11.60
   6   5 -11   28.00   12.40
   6   5 -11   18.30   10.20
  -6   5  11    4.30   10.20
   6  -5 -11    6.30   10.90
   6  -5 -11    8.50   11.00
   6   5 -10   12.80    9.50
   6   5 -10    0.60   10.50
   6  -5 -10  -11.10   10.50
   6  -5 -10   -2.10   10.20
  -6   5   9   32.60   11.70
   6   5  -9   18.30    9.40
   6   5  -9    9.40   11.30
   6  -5  -9    2.30   10.30
   6  -5  -9   15.70   11.20
  -6   5   8   65.19   12.90
   6   5  -8   50.39   13.10
   6   5  -8   51.79   10.60
   6  -5  -8   54.39   13.00
   6  -5  -8   34.80   11.50
   6   5  -7    9.70   10.80
  -6   5   7    1.00   10.10
   6   5  -7   24.90    9.30
   6   5  -7    8.70    4.30
   6   5  -7   25.40    8.70
   6   5  -7   17.50    4.50
   6  -5  -7   -2.30   10.00
   6  -5  -7   19.80   10.00
   6  -5  -7    3.00   10.50
   6   5  -6   82.09   11.50
   6   5  -6   79.89    7.30
   6   5  -6   63.79   10.20
  -6   5   6   90.39   13.20
   6   5  -6   96.59   14.50
  -6  -5   6   88.79    7.00
   6  -5  -6   58.19   12.60
   6  -5  -6   75.59   11.80
   6  -5  -6   90.39   13.80
   6   5  -5  183.48   17.60
  -6   5   5  191.28   17.00
   6   5  -5  181.38   11.40
   6   5  -5  195.58   15.80
   6  -5  -5  182.28   17.80
   6  -5  -5  168.18   17.00
   6  -5  -5  184.28   15.00
  -6  -5   5  172.28   13.70
  -6  -5   5  178.98   11.10
  -6   5   4    2.60    9.10
  -6   5   4    8.20    8.80
   6   5  -4    1.50    8.90
   6   5  -4    5.20    7.60
   6   5  -4    4.70    6.00
   6  -5  -4   17.50    7.60
   6  -5  -4    2.60    9.90
  -6  -5   4   -1.40    5.70
   6  -5  -4   13.00    9.70
  -6  -5   4    5.20    6.00
  -6   5   3 1059.99   37.70
   6   5  -3  953.80   34.00
  -6   5   3 1002.40   36.50
   6   5  -3 1021.20   32.90
   6   5  -3  984.80   37.30
  -6  -5   3 1034.60   33.40
  -6  -5   3  967.50   32.40
   6  -5  -3  958.30   38.00
   6  -5  -3 1041.90   34.80
   6  -5  -3  956.60   35.90
   6   5  -2   10.80    7.30
  -6   5   2    8.00    8.80
  -6   5   2    2.80    6.20
   6   5  -2    2.80    8.40
   6   5  -2    5.50    7.90
  -6   5   2    6.10    9.00
  -6   5   2   22.10    9.00
   6  -5  -2    9.60   10.00
  -6  -5   2    2.50    6.10
   6  -5  -2    5.10    6.90
  -6  -5   2   -4.20    6.30
   6  -5  -2    5.60    8.70
   6  -5  -2    3.70    7.80
   6   5  -1  134.39   13.00
  -6   5   1  134.69   13.90
   6   5  -1  124.59   12.60
  -6   5   1  145.09   14.90
  -6   5   1  145.29   12.20
  -6   5   1  119.59   13.60
   6  -5  -1  155.98   13.40
  -6  -5   1  140.39   12.50
   6  -5  -1  137.49   14.80
  -6  -5   1  126.69   12.90
   6  -5  -1  121.59   14.50
  -6   5   0   13.80    7.10
   6   5   0   18.70    8.30
  -6   5   0   10.40    9.00
  -6   5   0    0.20    8.50
  -6   5   0   10.00    8.90
   6   5   0   -5.30    7.80
   6  -5   0    6.50    8.50
  -6  -5   0   -3.30    6.80
   6  -5   0   18.20    7.70
  -6  -5   0    8.60    8.40
   6  -5   0    3.60    9.80
   6   5   1  676.03   28.30
  -6   5  -1  708.63   26.70
  -6   5  -1  668.73   29.00
  -6   5  -1  682.93   28.70
  -6   5  -1  629.94   28.60
   6   5   1  611.64   27.60
   6  -5   1  652.83   28.00
  -6  -5  -1  676.03   28.30
  -6  -5  -1  679.63   29.40
  -6   5  -2   82.89   12.40
  -6   5  -2   85.79   11.60
   6   5   2   91.39   13.00
  -6   5  -2   64.59   11.80
  -6   5  -2   80.19   12.70
   6   5   2   67.59   12.10
   6  -5   2   78.69   11.70
  -6  -5  -2  105.89   14.60
  -6  -5  -2   88.29   12.80
   6   5   3  337.57   19.00
  -6   5  -3  338.57   21.40
  -6   5  -3  326.97   23.20
   6   5   3  350.76   23.20
  -6  -5  -3  312.37   23.10
   6  -5   3  343.97   21.30
   6   5   4   23.20    7.70
  -6   5  -4   25.90    9.90
  -6   5  -4   24.20   11.40
   6  -5   4   29.00   10.10
  -6  -5  -4   13.00   12.10
  -6   5  -5   34.10   12.50
   6   5   5   24.30    7.30
  -6   5  -5   17.10    9.20
   6  -5   5   25.90    9.70
  -6  -5  -5   31.10   13.00
   6  -5   5   18.50   10.70
   6   5   6   38.30    7.60
  -6   5  -6   43.40   13.80
  -6   5  -6   47.00   10.00
   6  -5   6   35.10   11.90
  -6  -5  -6   58.49   14.90
   6  -5   6   38.70   10.90
  -6   5  -7   45.60   14.30
   6   5   7   23.10    6.80
   6  -5   7   34.00   11.10
   6  -5   7   19.40   11.50
  -6  -5  -7   36.30   14.50
  -6   5  -8    8.60   12.60
  -6   5  -8   -6.30    9.20
  -6  -5  -8    0.90   13.30
   6  -5   8   -9.30   11.00
  -6   5  -9  115.79   20.10
  -6   5  -9   88.39   14.70
   6   5   9   76.39   18.30
  -6  -5  -9   78.69   17.60
   6  -5   9   87.39   17.10
   6   6 -13   15.50   12.50
  -6   6  13   -2.00   12.70
   6   6 -13   15.40   12.40
   6  -6 -13    6.90   11.20
   6  -6 -13   21.00   13.40
   6   6 -12   -0.20   12.00
   6   6 -12   -3.00   10.30
  -6   6  12   28.70   13.20
   6  -6 -12    4.30   11.90
   6  -6 -12   11.00   11.60
   6   6 -11   43.50   12.30
   6   6 -11   20.30   12.70
   6  -6 -11    8.10   11.50
   6  -6 -11   15.00   12.80
  -6   6  10   32.40   13.40
   6   6 -10   25.90   11.00
   6   6 -10   24.50   12.50
   6  -6 -10   29.30   12.60
   6  -6 -10   39.40   13.60
   6   6  -9    1.30    9.10
  -6   6   9    9.50   11.80
   6   6  -9   -2.80   11.10
   6  -6  -9    7.60   11.00
   6  -6  -9   11.50   11.50
   6   6  -8   84.29   12.60
   6   6  -8   95.29   15.80
  -6   6   8   81.29   14.70
   6  -6  -8  101.49   15.70
   6  -6  -8   94.29   15.80
   6   6  -7   37.60   13.10
   6   6  -7   47.20    5.80
   6   6  -7   35.00   11.00
  -6   6   7   29.00   12.50
   6  -6  -7   39.90   13.30
   6  -6  -7   61.09   14.20
   6   6  -6    7.60    9.20
  -6   6   6   15.80   12.10
   6   6  -6    4.00   11.10
   6   6  -6    5.50    5.40
  -6  -6   6    4.50    4.90
   6  -6  -6   -9.90   10.80
   6  -6  -6   -0.90   11.60
  -6   6   5  271.87   21.20
   6   6  -5  265.37   22.10
   6   6  -5  246.98   19.50
   6   6  -5  277.97   14.70
   6  -6  -5  232.78   21.40
  -6  -6   5  293.87   17.70
   6  -6  -5  260.57   21.40
  -6  -6   5  270.57   14.00
  -6   6   4   17.40   11.40
   6   6  -4   37.70    7.80
   6   6  -4   17.70    9.80
  -6  -6   4   20.20    8.30
  -6  -6   4   26.40    7.50
   6  -6  -4    1.80    8.50
   6  -6  -4   14.10   11.90
   6  -6  -4   26.60   11.50
  -6   6   3   60.99   13.20
   6   6  -3   64.49   11.70
  -6   6   3   70.29   12.80
   6   6  -3   52.09    9.40
  -6  -6   3   65.39    9.80
   6  -6  -3   57.99   10.90
   6  -6  -3   58.49   11.40
  -6  -6   3   63.29   10.30
   6  -6  -3   51.49   12.30
  -6   6   2  121.69   14.30
   6   6  -2  143.69   14.70
   6   6  -2  136.39   13.10
  -6   6   2  126.89   15.20
  -6  -6   2  138.89   13.30
  -6  -6   2  150.78   13.90
   6  -6  -2  130.69   15.20
   6  -6  -2  104.69   15.00
   6  -6  -2  135.99   14.00
   6   6  -1  445.96   24.10
  -6   6   1  382.56   20.60
  -6   6   1  399.26   24.10
   6   6  -1  426.36   21.50
  -6   6   1  379.96   23.20
  -6  -6   1  437.96   21.90
   6  -6  -1  388.76   23.20
  -6  -6   1  419.56   22.00
  -6   6   0  136.59   15.50
   6   6   0  127.29   14.70
  -6   6   0  133.99   15.60
  -6   6   0  117.59   12.60
   6   6   0  102.69   13.00
  -6  -6   0  109.89   13.50
   6  -6   0  108.79   14.60
  -6  -6   0  108.69   12.80
   6   6   1   94.19   13.60
   6   6   1  128.59   14.70
  -6   6  -1   87.09   14.10
  -6   6  -1  123.39   14.60
  -6   6  -1  106.69   13.20
  -6  -6  -1  111.29   14.00
  -6  -6  -1  117.59   15.00
   6  -6   1  130.79   15.40
   6   6   2   51.59   12.30
  -6   6  -2   57.79   13.40
   6   6   2   51.59   11.70
  -6   6  -2   62.59   12.40
   6  -6   2   41.10   11.20
  -6  -6  -2   57.39   13.10
  -6   6  -3   89.39   14.00
  -6   6  -3   81.29   14.00
   6   6   3   75.99   14.10
   6  -6   3   79.59   12.80
  -6  -6  -3   71.19   14.00
  -6   6  -4    3.80   10.70
  -6  -6  -4   19.80   12.10
   6  -6   4   12.80    9.30
   6   6   5  303.97   18.40
  -6   6  -5  296.17   24.70
   6  -6   5  300.77   21.00
  -6  -6  -5  314.67   25.40
   6   6   6  154.58   13.20
  -6   6  -6  129.49   19.10
  -6  -6  -6  141.09   19.60
   6  -6   6  119.59   14.50
  -6   6  -7   37.00   15.20
  -6  -6  -7   41.00   15.60
  -6   6  -8   61.79   17.20
  -6  -6  -8   33.60   16.20
  -6   6  -9   24.20   15.90
   6  -6   9   -8.90   13.10
  -6  -6  -9   20.00   14.90
   6   7 -12   34.70   14.60
   6   7 -12    8.30   12.30
   6  -7 -12    7.50   13.30
   6   7 -11   15.70   13.00
   6   7 -11    7.90   11.60
   6  -7 -11    1.30   12.90
   6   7 -10   30.20   13.80
  -6   7  10   29.60   13.70
   6   7 -10    7.50   11.60
   6  -7 -10   45.30   13.60
   6  -7 -10   17.60   13.80
   6   7  -9    1.70   12.20
  -6   7   9    3.60   12.30
   6   7  -9  -10.90    9.70
   6  -7  -9  -13.50   10.00
   6  -7  -9   19.40   13.20
   6   7  -8   17.40   12.30
   6   7  -8   25.70   11.40
  -6   7   8   11.40   12.70
   6  -7  -8    9.60   11.60
   6  -7  -8   -4.30   11.80
  -6   7   7   19.50   13.00
   6   7  -7   35.20   11.60
   6   7  -7   32.20    6.00
   6   7  -7   34.10   13.10
   6  -7  -7   41.70   13.00
   6  -7  -7   52.89   14.10
  -6   7   6   18.10   12.70
   6   7  -6   33.70   13.40
   6   7  -6   31.70    6.90
   6   7  -6   21.90   11.10
  -6  -7   6   34.60    6.40
   6  -7  -6   16.40   12.50
   6  -7  -6   23.00   11.90
   6   7  -5    4.30    6.20
   6   7  -5   -1.30    9.70
  -6   7   5   -5.90   12.00
   6  -7  -5   10.80   11.30
  -6  -7   5    3.40    6.00
  -6   7   4  200.48   20.30
   6   7  -4  202.58   18.20
   6   7  -4  202.08   15.20
   6  -7  -4  202.48   20.20
  -6  -7   4  181.28   14.10
   6   7  -3  285.47   23.10
  -6   7   3  321.57   25.40
   6   7  -3  279.57   17.80
  -6  -7   3  297.27   18.20
   6  -7  -3  287.27   22.50
   6   7  -2   81.19   12.20
   6   7  -2  102.89   15.60
  -6   7   2   94.59   16.00
   6  -7  -2  120.89   15.40
  -6  -7   2  102.79   13.10
  -6   7   1   18.60   11.00
   6   7  -1  -11.40    7.30
  -6   7   1   15.10   11.60
   6   7  -1    3.70   11.30
   6  -7  -1    1.30    9.90
  -6  -7   1   -1.10    8.80
   6   7   0  147.59   17.00
  -6   7   0   96.09   16.00
   6   7   0  144.89   15.70
  -6   7   0  132.89   16.50
  -6  -7   0  118.59   14.60
   6  -7   0  113.49   15.30
  -6   7  -1  181.88   18.80
   6   7   1  187.18   18.40
   6   7   1  183.68   17.60
  -6   7  -1  264.27   21.20
  -6  -7  -1  187.78   19.00
   6  -7   1  181.08   18.20
  -6   7  -2  265.47   21.80
   6   7   2  244.88   20.70
  -6   7  -2  254.37   22.00
  -6  -7  -2  275.47   22.50
   6  -7   2  266.87   20.80
  -6   7  -3   35.40   11.50
   6   7   3   26.90   12.60
  -6   7  -3   48.10   14.70
   6  -7   3   34.50   11.00
  -6  -7  -3   42.50   13.20
   6   7   4  207.78   21.20
  -6   7  -4  213.98   22.40
  -6  -7  -4  246.98   23.30
   6  -7   4  199.58   18.20
  -6   7  -5   57.59   15.50
   6  -7   5   35.10   12.30
  -6  -7  -5   36.70   14.50
  -6   7  -6   10.10   13.60
  -6  -7  -6    0.50   13.10
  -6   7  -7    7.80   14.20
  -6  -7  -7   -3.70   14.00
  -6   7  -8   11.90   15.00
  -6  -7  -8    6.50   15.30
   6   8 -11   -2.50   11.70
  -6   8  11    9.90   14.10
   6   8 -11   15.70   13.80
   6  -8 -11    0.20   13.80
   6   8 -10    9.10   12.20
  -6   8  10   22.10   15.20
   6   8 -10   12.60   13.80
   6  -8 -10   13.60   14.30
   6   8  -9   -6.60   11.10
   6   8  -9   -3.30   12.50
  -6   8   9   12.80   13.40
   6  -8  -9   -0.90   13.00
   6   8  -8   48.50   13.80
  -6   8   8   31.00   15.20
   6   8  -8   41.60   14.70
   6  -8  -8   49.50   16.10
   6   8  -7   -2.20   11.60
   6   8  -7  -12.10   10.50
  -6   8   7   -9.20   12.90
   6  -8  -7   -9.70   12.20
  -6   8   6   21.20   14.30
   6   8  -6   38.50   13.10
   6  -8  -6   61.89   15.40
   6   8  -5    8.50   11.90
  -6   8   5    2.90   13.50
   6  -8  -5   -6.90   11.50
  -6   8   4   13.30   14.20
   6   8  -4   22.50   12.70
   6  -8  -4   62.09   14.50
  -6  -8   4   34.90    8.70
   6   8  -3    4.20   11.50
  -6   8   3    0.90   13.20
   6   8  -3    1.00    7.80
   6  -8  -3   -1.20   10.90
  -6  -8   3    9.70    8.10
   6   8  -2  266.57   19.40
  -6   8   2  264.47   23.60
   6   8  -2  264.47   22.20
   6  -8  -2  227.48   20.90
  -6  -8   2  274.27   19.40
  -6   8   1   48.70   14.70
   6   8  -1   45.40   13.90
   6   8  -1   32.30   10.30
   6  -8  -1   35.90   12.00
  -6  -8   1   24.70   10.30
   6   8   0  253.37   21.00
  -6   8   0  277.67   22.30
   6   8   0  247.08   21.60
  -6   8   0  269.77   23.70
   6  -8   0  244.88   21.20
  -6  -8   0  259.57   21.30
   6   8   1   11.30   12.40
  -6   8  -1    8.50   10.60
  -6   8  -1  -20.20   11.00
   6  -8   1    2.80   10.00
  -6  -8  -1    0.80   10.50
  -6   8  -2   -0.90   11.90
   6   8   2   10.00   12.40
  -6  -8  -2   -1.60   11.10
   6  -8   2   -1.40    9.70
  -6   8  -3  105.09   18.30
   6   8   3   88.89   16.50
   6  -8   3   97.39   14.50
  -6  -8  -3   92.69   16.50
   6   8   4   61.19   15.80
  -6   8  -4   30.80   14.80
  -6  -8  -4   42.70   16.00
  -6   8  -5  -12.00   13.10
   6   8   5  -23.60   12.70
  -6  -8  -5    5.30   13.90
  -6   8  -6   56.09   17.10
  -6  -8  -6   43.80   17.00
  -6   9   9   19.20   15.60
   6   9  -9   -6.60   12.00
   6   9  -9  -13.60   12.90
   6  -9  -9   22.20   15.50
   6   9  -8    2.80   13.60
   6   9  -8  -21.80   12.10
  -6   9   8   -2.00   14.70
   6  -9  -8    2.60   13.30
  -6   9   7   63.29   17.60
   6   9  -7   47.10   15.60
   6  -9  -7   63.09   17.50
   6   9  -6   16.30   13.60
  -6   9   6   10.20   14.80
   6  -9  -6   -5.30   11.90
  -6   9   5    4.10   15.10
   6   9  -5  -10.30   12.90
   6  -9  -5  -11.20   11.70
  -6   9   4   56.19   17.40
   6   9  -4   83.69   17.20
   6  -9  -4  101.89   17.70
  -6   9   3   20.80   15.40
   6   9  -3    8.80   13.60
   6  -9  -3    7.20   11.60
  -6   9   2  -10.10   13.80
   6   9  -2   -3.00   12.90
   6  -9  -2    7.10   12.20
   6   9  -1    2.10   13.20
  -6   9   1    1.00   14.20
  -6  -9   1  -23.00    9.00
   6  -9  -1   14.80   11.90
  -6   9   0   39.40   16.10
   6   9   0   44.60   15.20
  -6  -9   0   18.10   11.80
   6  -9   0   44.70   13.30
  -6   9  -1   -2.80   13.70
   6   9   1   -6.40   13.00
   6  -9   1   16.90   11.50
  -6  -9  -1   -3.20   10.90
   6   9   2  116.09   19.10
  -6   9  -2   93.39   18.70
  -6  -9  -2  130.49   18.80
   6  -9   2  122.49   16.80
   6   9   3   23.30   14.60
  -6   9  -3   -8.70   14.00
  -6  -9  -3   19.00   14.10
   6   9   4   33.80   15.60
  -6   9  -4   21.50   15.60
  -6  -9  -4   26.60   15.50
  -6   9  -5   43.80   17.60
   6   9   5   54.99   16.50
  -6  -9  -5   51.49   16.90
   6  10  -7   15.00   15.50
  -6  10   7   21.20   17.80
  -6  10   6   18.00   17.10
   6  10  -6   -3.70   14.60
   6 -10  -6   39.10   16.90
   6  10  -5    5.80   14.90
  -6  10   5  -15.30   15.90
   6 -10  -5    4.10   13.80
   6  10  -4  -16.30   13.40
  -6  10   4  -13.30   15.90
   6 -10  -4   -3.10   12.40
  -6  10   3   21.50   17.60
   6  10  -3   10.20   15.00
   6 -10  -3    6.60   13.40
  -6  10   2   14.10   17.30
   6  10  -2   15.30   15.70
   6 -10  -2   15.50   13.80
  -6  10   1   39.20   18.30
   6  10  -1   43.10   16.90
   6 -10  -1   39.40   14.60
   6  10   0   46.80   17.00
  -6  10   0   48.80   18.30
   6 -10   0   92.19   16.30
   6  10   1   10.90   15.50
  -6  10  -1    3.70   15.70
  -6  10  -2  -11.20   14.40
   6  10   2   16.20   15.50
  -6 -10  -2  -11.80   12.00
   7   0 -15   -3.10    8.00
  -7   0  15   18.30   12.00
   7   0 -15   -9.20    9.90
   7   0 -14   30.70   11.30
   7   0 -14   14.10    8.20
  -7   0  14   30.50   12.20
  -7   0  13    4.30    9.80
   7   0 -13  -21.20    9.40
   7   0 -13   -5.50    7.20
   7   0 -12   61.69   12.20
   7   0 -12   39.80    9.10
  -7   0  12   27.80    9.80
   7   0 -11    6.60    8.30
   7   0 -11    5.70    9.70
   7   0 -11    0.20    7.00
  -7   0  11   -9.60    7.40
  -7   0  10  148.09   12.70
   7   0 -10  148.19   13.40
   7   0 -10  135.49   15.30
   7   0 -10  161.18   13.00
   7   0  -9   -0.90    6.40
   7   0  -9    4.50    5.90
   7   0  -9  -10.90    8.30
  -7   0   9    4.60    6.00
  -7   0   9    3.10    6.00
  -7   0   9   -2.70    7.90
   7   0  -9    1.20    6.60
   7   0  -8   97.79    9.40
  -7   0   8   93.09    8.70
   7   0  -8  104.19   10.00
  -7   0   8  119.29   13.50
   7   0  -8   93.69   10.20
   7   0  -8  131.19   14.50
  -7   0   8  127.19   10.90
   7   0  -7    3.30    6.30
  -7   0   7    5.90    5.70
   7   0  -7    0.00    5.50
  -7   0   7    1.80    4.20
  -7   0   7   -5.10    6.80
   7   0  -7  -12.20    7.40
   7   0  -7   -3.30    4.70
   7   0  -6   -0.70    5.70
   7   0  -6   -3.60    7.80
  -7   0   6   -6.00    5.50
   7   0  -6   11.90    6.10
   7   0  -6    9.10    4.00
  -7   0   6    7.60    7.30
  -7   0   5    2.50    5.90
   7   0  -5    0.60    6.80
  -7   0   5    4.50    6.10
   7   0  -5   -3.50    5.30
   7   0  -5    0.90    5.90
   7   0  -4 5775.62  149.29
  -7   0   4 5841.32  151.38
   7   0  -4 5973.90  149.39
   7   0  -4 5903.01  151.68
  -7   0   3    5.50    6.80
   7   0  -3   -0.60    6.90
   7   0  -3    2.20    6.00
  -7   0   3    0.10    6.80
   7   0  -3    2.70    6.20
   7   0  -2 1559.54   47.40
  -7   0   2 1634.44   47.40
   7   0  -2 1563.04   40.00
   7   0  -2 1558.14   46.70
  -7   0   2 1581.34   39.90
  -7   0   2 1584.44   47.10
   7   0  -2 1587.24   47.20
   7   0  -1    4.30    7.40
   7   0  -1   -3.00    6.40
   7   0  -1    5.30    6.40
   7   0  -1    2.90    4.20
  -7   0   1   -4.30    5.70
  -7   0   1    1.10    7.20
  -7   0   0    0.10    5.50
   7   0   0    4.50    6.10
   7   0   0    1.40    5.80
  -7   0   0   -2.90    6.40
   7   0   0   -1.80    7.30
   7   0   0    3.20    4.90
   7   0   1    2.90    6.10
   7   0   1  -10.30    5.30
  -7   0  -1    5.60    5.40
  -7   0  -1    7.80    8.10
   7   0   1    0.40    5.50
   7   0   2  328.67   15.70
  -7   0  -2  317.27   15.10
  -7   0  -2  383.96   20.80
   7   0   2  348.07   19.00
   7   0   2  309.77   16.80
  -7   0  -3    0.60    4.60
  -7   0  -3   -3.70    8.00
   7   0   3   -5.10    6.80
   7   0   3    0.30    5.30
   7   0   3    9.80    7.50
   7   0   4 1542.45   42.30
   7   0   4 1487.35   47.50
  -7   0  -4 1409.56   48.80
  -7   0  -4 1560.54   42.10
   7   0   5    7.70    9.20
  -7   0  -5   -1.60    8.70
   7   0   5    7.50    4.80
   7   0   6   30.90   11.70
  -7   0  -6   25.80   10.80
   7   0   7    3.90   10.50
  -7   0  -7   -7.90    9.60
   7   0   8  245.98   22.20
  -7   0  -8  228.68   21.40
  -7   0  -9    5.70   11.30
   7   0   9   11.30   12.60
   7   0  10  155.28   21.20
  -7   0 -10  147.59   19.50
   7   1 -15   37.30   12.70
  -7   1  15   79.39   15.30
   7   1 -15   48.80    8.80
   7  -1 -15   65.39   13.60
   7  -1 -15   55.99   12.00
  -7  -1  15   61.49   15.10
  -7   1  14   -2.90   10.20
   7   1 -14    1.00   10.30
   7   1 -14    6.20    6.80
   7  -1 -14    5.90    8.60
  -7  -1  14    8.70   11.20
   7  -1 -14    7.20   10.80
  -7   1  13    3.10    9.90
   7   1 -13    5.80    6.40
   7   1 -13    4.20    9.80
  -7  -1  13   11.90   10.20
   7  -1 -13   -5.60    9.70
   7  -1 -13   -4.40    8.10
  -7   1  12   25.00    9.70
   7   1 -12   28.20    7.50
   7   1 -12   27.20   11.40
   7  -1 -12   21.90    9.50
   7  -1 -12   42.20   11.40
  -7  -1  12   38.90   10.60
   7   1 -11    5.60    6.40
  -7   1  11    7.00    7.70
   7   1 -11   -1.40    5.40
   7   1 -11   -2.90    9.60
  -7  -1  11    5.70    5.30
   7  -1 -11    9.60    8.10
   7  -1 -11   -2.00    8.80
   7  -1 -11   13.50   10.20
  -7  -1  11    3.10    8.20
   7   1 -10   34.60    7.50
   7   1 -10    8.80    9.60
   7   1 -10   34.90    8.70
  -7   1  10   19.70    7.80
   7   1 -10   27.80    6.80
  -7  -1  10   32.30    6.60
   7  -1 -10   18.50    8.80
   7  -1 -10   20.50   10.50
  -7  -1  10   29.10    8.90
   7  -1 -10   32.00    9.50
   7   1  -9   -0.20    5.50
   7   1  -9    3.40    9.10
  -7   1   9    1.40    6.10
   7   1  -9    1.80    6.50
   7   1  -9    2.80    5.90
   7  -1  -9    8.60    7.80
  -7  -1   9    4.10    5.40
   7  -1  -9    0.10    9.20
   7  -1  -9    0.40    7.40
  -7  -1   9    1.80    6.50
  -7   1   8  380.46   18.10
  -7   1   8  328.57   14.40
   7   1  -8  370.36   15.90
   7   1  -8  318.37   15.80
  -7   1   8  366.86   21.00
   7   1  -8  333.67   20.90
   7   1  -8  291.37   14.90
   7  -1  -8  354.16   21.20
  -7  -1   8  357.96   20.30
   7  -1  -8  351.66   17.20
   7  -1  -8  321.87   18.20
   7   1  -7   17.60    5.30
  -7   1   7   26.20    8.10
   7   1  -7    5.50    5.80
  -7   1   7   28.90    7.40
   7   1  -7   18.10    5.90
   7   1  -7   13.20    9.10
  -7   1   7   19.00    4.50
   7  -1  -7   15.10    7.10
   7  -1  -7    9.80    8.70
   7  -1  -7   21.20    7.80
   7  -1  -7   28.30    6.50
  -7  -1   7    6.00    7.10
  -7   1   6  858.11   22.70
   7   1  -6  836.72   24.00
   7   1  -6  883.31   24.90
   7   1  -6  866.81   32.30
   7   1  -6  908.11   27.90
   7   1  -6  867.91   24.30
   7   1  -6  849.52   27.90
  -7   1   6  880.51   29.60
  -7   1   6  868.61   31.70
   7  -1  -6  802.02   28.80
  -7  -1   6  857.41   31.60
   7  -1  -6  840.12   25.80
   7  -1  -6  850.51   32.10
   7  -1  -6  875.91   30.00
   7   1  -5  566.74   20.70
   7   1  -5  570.94   24.10
  -7   1   5  550.84   22.30
   7   1  -5  545.45   20.90
   7   1  -5  534.35   16.50
  -7   1   5  574.94   23.50
  -7  -1   5  519.85   22.70
   7  -1  -5  532.05   16.80
   7  -1  -5  542.85   23.80
   7  -1  -5  534.55   22.40
   7  -1  -5  534.95   21.70
  -7   1   4   48.50    7.90
  -7   1   4   74.39    9.40
   7   1  -4   72.19    8.80
   7   1  -4   69.79    5.30
  -7   1   4   82.19    5.80
   7   1  -4   70.69   10.50
   7   1  -4   72.19    8.50
  -7  -1   4   93.89    9.60
   7  -1  -4   81.79   10.10
  -7  -1   4   56.49    8.40
   7  -1  -4   71.49   10.40
   7  -1  -4   66.29    9.00
   7  -1  -4   80.89    5.50
  -7   1   3  202.28    8.40
  -7   1   3  115.89   10.90
   7   1  -3  163.28   12.30
   7   1  -3  206.28   14.90
   7   1  -3  174.68   13.00
  -7   1   3  181.68   13.80
  -7  -1   3  184.88   14.10
   7  -1  -3  192.28   13.40
   7  -1  -3  174.58   13.80
   7  -1  -3  201.38   15.50
  -7  -1   3  183.28   13.00
   7   1  -2 3587.84   93.79
  -7   1   2 3489.65   88.59
   7   1  -2 3473.75   93.79
  -7   1   2 3563.84   94.59
  -7   1   2 3539.45   94.19
   7   1  -2 3420.16   93.99
   7  -1  -2 3609.74   94.39
  -7  -1   2 3551.14   93.79
   7  -1  -2 3501.95   85.49
  -7  -1   2 3574.34   87.19
   7  -1  -2 3433.56   94.19
   7  -1  -2 3588.04   94.59
  -7  -1   2 3591.74   94.29
  -7   1   1  326.07   16.80
   7   1  -1  342.17   17.30
  -7   1   1  312.57   18.10
  -7   1   1  333.67   13.20
   7   1  -1  323.27   17.20
   7  -1  -1  318.37   17.40
  -7  -1   1  341.77   18.00
   7  -1  -1  319.87   17.20
   7  -1  -1  334.67   12.30
  -7  -1   1  357.16   12.70
   7  -1  -1  307.07   16.50
  -7  -1   1  347.37   16.80
  -7   1   0 2258.57   61.29
   7   1   0 2321.37   63.69
  -7   1   0 2203.78   65.09
  -7   1   0 2348.67   63.99
   7   1   0 2363.06   65.59
   7  -1   0 2293.57   59.69
  -7  -1   0 2317.37   63.59
  -7  -1   0 2262.47   65.39
   7  -1   0 2311.27   65.39
  -7  -1   0 2334.67   60.79
   7  -1   0 2351.66   64.19
   7  -1   0 2234.38   65.59
   7   1   1  272.37   17.20
  -7   1  -1  249.28   16.30
   7   1   1  265.97   14.70
   7   1   1  282.67   14.80
  -7   1  -1  286.97   15.10
   7  -1   1  256.47   17.20
   7  -1   1  265.97   16.90
  -7  -1  -1  257.07   16.30
   7  -1   1  271.07   13.80
  -7  -1  -1  278.67   14.50
   7  -1   1  283.37   15.60
   7   1   2 1073.19   33.30
  -7   1  -2 1006.80   37.00
  -7   1  -2 1089.49   33.50
   7   1   2  987.80   34.10
   7   1   2 1121.59   37.60
  -7  -1  -2 1102.69   34.60
   7  -1   2 1085.39   37.60
  -7  -1  -2 1062.29   32.70
   7  -1   2 1082.79   33.90
  -7  -1  -2 1046.80   37.00
   7  -1   2 1081.89   34.00
   7  -1   2 1086.39   36.90
   7   1   3  109.79   12.30
  -7   1  -3  116.59   13.90
   7   1   3  132.99   14.50
   7   1   3  109.09    9.40
  -7   1  -3  130.49   10.60
   7  -1   3  126.99   14.50
   7  -1   3  133.29   12.80
  -7  -1  -3   90.69   11.30
  -7  -1  -3  133.09   15.00
   7  -1   3  128.49   10.50
  -7   1  -4   76.19    7.90
   7   1   4   80.19   12.30
   7   1   4   64.49    7.40
  -7   1  -4   96.89   13.70
   7  -1   4   54.59   10.80
  -7  -1  -4   66.39   11.90
  -7  -1  -4   68.59   10.80
   7  -1   4   69.89    8.40
  -7   1  -5   -1.90    4.50
  -7   1  -5    3.40    9.40
   7   1   5    4.20    9.90
   7   1   5    1.30    4.60
  -7  -1  -5   10.70   10.40
   7  -1   5  -10.00    8.80
  -7   1  -6  389.26   24.90
  -7   1  -6  367.16   13.40
   7   1   6  377.96   23.80
  -7  -1  -6  355.76   23.90
   7  -1   6  376.06   23.30
  -7   1  -7   62.09   13.60
   7   1   7   75.59   14.60
   7  -1   7   57.99   13.60
  -7  -1  -7   48.60   12.80
   7   1   8  476.25   29.60
  -7   1  -8  479.95   28.60
   7  -1   8  512.95   30.10
  -7  -1  -8  482.15   29.80
   7   1   9    9.40   12.60
  -7   1  -9   17.40   11.70
   7  -1   9    0.40   12.10
  -7  -1  -9   -5.30   11.10
   7   1  10    4.10   13.70
  -7   1 -10    0.60   11.50
  -7  -1 -10    2.10   12.30
   7  -1  10   25.20   14.30
  -7   2  15   11.20   12.00
   7   2 -15   -7.70   10.30
   7  -2 -15   17.60   12.00
  -7  -2  15   -9.20   11.00
   7  -2 -15    8.20   10.20
  -7   2  14   14.00   10.80
   7   2 -14   11.90   10.80
   7   2 -14    8.10    4.90
   7  -2 -14   12.90   11.40
   7  -2 -14   -8.10    9.10
  -7  -2  14   -0.20   11.30
   7   2 -13   -9.30    9.40
   7   2 -13   -1.50    4.60
  -7   2  13    3.80    9.00
   7  -2 -13   -5.60    8.80
   7  -2 -13   -8.70    9.50
  -7  -2  13  -12.00    9.20
  -7   2  12    5.90    8.80
   7   2 -12   11.80   10.20
   7   2 -12    0.10    4.60
   7   2 -12   -3.20    4.80
   7  -2 -12    6.00   10.10
  -7  -2  12  -14.80    8.30
   7  -2 -12   -7.60    8.20
  -7   2  11   70.89   10.80
   7   2 -11   83.29   13.30
   7   2 -11   65.49   11.30
   7   2 -11   67.39    7.00
   7   2 -11   63.59    7.30
   7  -2 -11   57.19   12.80
   7  -2 -11   65.89   11.70
  -7  -2  11   81.99   12.10
   7   2 -10   88.79   13.70
   7   2 -10  106.69    8.60
  -7   2  10  104.99   11.50
   7   2 -10  109.49    8.50
   7   2 -10   97.19   11.80
   7  -2 -10  111.19   14.90
   7  -2 -10   83.29   12.80
   7  -2 -10   94.39   13.00
   7   2  -9  108.09    8.90
  -7   2   9  100.89   10.40
   7   2  -9  115.99   11.70
   7   2  -9  121.39    9.40
   7   2  -9  133.69   15.90
   7  -2  -9  122.39   12.80
   7  -2  -9  110.59   13.20
   7  -2  -9  113.69   14.40
   7   2  -8  112.49   10.30
   7   2  -8  115.29    9.20
  -7   2   8  111.39   13.50
   7   2  -8  113.59    9.60
   7   2  -8  116.59    9.10
   7   2  -8  108.59   13.90
  -7   2   8  101.19    8.80
   7  -2  -8  121.39   12.80
   7  -2  -8  108.59   11.40
   7  -2  -8   94.59   13.20
  -7   2   7    6.50    6.90
   7   2  -7   -3.40    5.20
   7   2  -7   -0.30    4.70
   7   2  -7   -0.50    4.40
  -7   2   7   -3.30    6.60
   7   2  -7    4.90    5.30
  -7   2   7   -1.00    4.40
   7   2  -7   -5.00    8.20
   7  -2  -7   -0.50    7.50
  -7  -2   7   -7.20    7.10
   7  -2  -7   -4.80    6.30
   7  -2  -7    1.80    8.50
  -7   2   6   -1.50    6.30
   7   2  -6    0.10    4.70
  -7   2   6    3.10    6.90
  -7   2   6    3.40    5.20
   7   2  -6    2.10    3.90
  -7   2   6   -2.30    3.30
   7   2  -6    8.60    5.40
   7   2  -6   12.90    7.80
   7   2  -6    0.40    4.70
   7  -2  -6    0.60    8.30
   7  -2  -6    0.20    6.90
  -7  -2   6   -3.20    6.90
   7  -2  -6   -7.00    5.00
  -7   2   5  190.18   15.00
   7   2  -5  192.18   12.70
   7   2  -5  214.58    9.00
  -7   2   5  214.38   13.30
   7   2  -5  208.28   16.60
   7   2  -5  220.58   11.10
   7   2  -5  201.98   12.70
  -7   2   5  201.98   11.50
   7  -2  -5  226.98   17.10
  -7  -2   5  192.48   12.00
  -7  -2   5  211.68   14.00
   7  -2  -5  225.48   11.40
   7  -2  -5  187.68   14.10
   7  -2  -5  204.58   15.40
   7   2  -4 1456.05   42.70
   7   2  -4 1495.55   42.60
   7   2  -4 1448.66   37.30
  -7   2   4 1435.96   40.20
   7   2  -4 1451.05   45.80
  -7   2   4 1445.36   44.50
  -7  -2   4 1424.06   42.30
   7  -2  -4 1465.15   39.70
   7  -2  -4 1418.36   45.90
   7  -2  -4 1446.76   44.80
  -7  -2   4 1478.95   45.60
   7  -2  -4 1437.96   44.50
   7   2  -3 1393.56   43.10
   7   2  -3 1362.26   40.90
   7   2  -3 1350.66   35.10
  -7   2   3 1362.96   42.80
  -7   2   3 1379.46   43.40
  -7   2   3 1363.06   38.20
   7  -2  -3 1337.67   37.30
  -7  -2   3 1379.26   42.90
   7  -2  -3 1356.86   43.50
   7  -2  -3 1313.17   42.20
  -7  -2   3 1344.17   40.80
   7  -2  -3 1324.77   42.40
  -7  -2   3 1363.76   35.10
  -7   2   2  416.56   20.10
  -7   2   2  404.86   13.30
  -7   2   2  386.26   15.90
  -7   2   2  453.45   20.90
   7   2  -2  457.55   19.20
   7   2  -2  401.66   19.60
   7  -2  -2  405.86   20.40
  -7  -2   2  438.56   19.70
   7  -2  -2  373.96   20.40
  -7  -2   2  417.96   13.90
   7  -2  -2  439.06   20.00
  -7  -2   2  431.26   20.00
  -7   2   1  176.58   11.10
   7   2  -1  192.98   14.10
  -7   2   1  212.98   15.60
  -7   2   1  175.18    9.60
  -7   2   1  185.08   14.70
   7   2  -1  173.58   13.50
  -7  -2   1  180.18   13.90
  -7  -2   1  188.18   10.70
   7  -2  -1  165.38   13.40
   7  -2  -1  191.18   14.30
   7  -2  -1  175.48   13.90
  -7   2   0    4.10    4.70
  -7   2   0    9.10    8.10
  -7   2   0    6.10    6.50
   7   2   0    1.90    6.50
  -7   2   0    8.80    5.60
   7   2   0    8.70    6.60
   7  -2   0   33.20    7.90
   7  -2   0   26.10    7.90
   7  -2   0   15.90    8.20
  -7  -2   0    3.00    7.30
   7  -2   0    9.30    5.10
  -7  -2   0    7.10    5.20
   7   2   1  227.18   16.00
  -7   2  -1  195.18   12.90
  -7   2  -1  204.98   15.40
  -7   2  -1  187.68   13.50
   7   2   1  198.98   13.70
  -7   2  -1  187.78   14.20
   7  -2   1  180.78   14.60
   7  -2   1  190.68   12.30
  -7  -2  -1  212.88   16.40
  -7  -2  -1  213.78   13.50
   7  -2   1  207.48   14.80
   7  -2   1  225.38   15.60
   7   2   2 1201.68   36.60
  -7   2  -2 1219.48   37.40
   7   2   2 1250.07   41.10
  -7   2  -2 1190.48   40.60
  -7   2  -2 1168.18   37.30
  -7  -2  -2 1222.88   38.20
  -7  -2  -2 1214.48   41.20
   7  -2   2 1157.98   37.60
   7  -2   2 1179.68   40.10
   7  -2   2 1153.78   36.90
  -7   2  -3  832.12   28.30
   7   2   3  802.32   26.90
  -7   2  -3  781.92   32.10
  -7   2  -3  826.22   30.00
   7   2   3  847.52   33.20
  -7  -2  -3  856.01   31.00
  -7  -2  -3  793.42   33.00
   7  -2   3  854.81   28.90
   7  -2   3  836.82   32.50
   7  -2   3  800.82   30.00
   7   2   4  602.14   27.00
  -7   2  -4  614.04   22.50
  -7   2  -4  592.84   27.40
   7   2   4  604.04   21.20
  -7   2  -4  641.04   27.00
   7  -2   4  578.64   22.70
  -7  -2  -4  586.34   28.70
  -7  -2  -4  605.64   27.10
   7  -2   4  602.34   27.80
   7  -2   4  594.04   26.70
   7   2   5  322.57   13.50
  -7   2  -5  341.17   15.70
  -7   2  -5  283.17   21.10
   7   2   5  318.97   22.10
  -7  -2  -5  267.87   20.80
   7  -2   5  294.37   20.70
   7  -2   5  333.57   21.20
  -7   2  -6   24.80    5.90
   7   2   6   37.20   12.40
  -7   2  -6   39.30   11.80
   7  -2   6   29.40   11.40
   7  -2   6   25.40   11.10
  -7  -2  -6   16.70   11.30
   7   2   7   57.89   13.70
  -7   2  -7   62.39   13.00
   7  -2   7   77.49   14.40
   7  -2   7   55.29   12.70
  -7  -2  -7   76.09   15.40
   7   2   8   64.89   15.50
  -7   2  -8   98.89   15.40
   7  -2   8   48.10   14.30
  -7  -2  -8   78.39   16.10
   7  -2   8   92.99   15.10
   7   2   9   65.79   16.00
  -7   2  -9   80.69   15.00
  -7  -2  -9   51.39   15.40
   7  -2   9   44.10   14.90
  -7   2 -10  134.89   18.00
   7   2  10  120.29   19.50
   7  -2  10  154.28   21.10
  -7  -2 -10  125.49   19.70
   7   3 -14    8.60   11.20
  -7   3  14    8.30   11.10
   7  -3 -14   10.60   11.10
   7  -3 -14  -12.80   10.40
  -7   3  13   12.60   10.40
   7   3 -13   -1.20   10.30
   7  -3 -13    7.80   10.50
   7  -3 -13    8.50   10.20
   7   3 -12   47.40   10.50
  -7   3  12    3.30    9.20
   7   3 -12   12.40   10.70
   7  -3 -12   11.20   10.80
   7  -3 -12   10.30   10.30
   7   3 -11   -9.30    7.50
  -7   3  11   -7.80    7.50
   7   3 -11   10.80   10.40
   7  -3 -11    3.30   10.10
   7  -3 -11   -4.10    9.00
   7   3 -10   -5.00    7.40
   7   3 -10    2.20    7.00
   7   3 -10  -10.20    9.80
   7   3 -10    2.40    3.60
   7   3 -10   -0.10    3.50
  -7   3  10    1.90    7.70
   7  -3 -10    8.10    9.90
   7  -3 -10    5.60    9.20
   7  -3 -10    2.90   10.10
   7   3  -9   21.70    8.40
   7   3  -9   11.50    6.90
   7   3  -9   13.30   10.40
   7   3  -9   20.20    4.70
   7   3  -9   11.70    4.80
  -7   3   9   18.30    7.50
   7  -3  -9    5.60    9.30
   7  -3  -9   14.10    9.80
   7  -3  -9   19.00   10.70
   7   3  -8   38.70    5.80
  -7   3   8   46.50    7.60
   7   3  -8   39.70    7.50
   7   3  -8   47.00    8.70
   7   3  -8   38.00   11.50
   7   3  -8   33.40    5.80
   7  -3  -8   38.00    9.70
   7  -3  -8   41.80   11.40
   7  -3  -8   33.90   10.20
  -7   3   7  401.76   19.80
   7   3  -7  460.95   24.50
   7   3  -7  416.76   17.50
   7   3  -7  419.86   16.30
   7   3  -7  450.95   16.40
   7   3  -7  436.66   19.00
   7  -3  -7  404.66   22.00
   7  -3  -7  427.26   20.50
   7  -3  -7  382.66   23.70
   7   3  -6  299.87   14.00
   7   3  -6  289.97   15.20
  -7   3   6  299.27   19.80
   7   3  -6  282.57   20.30
  -7   3   6  285.17   16.20
   7   3  -6  299.77   14.10
   7   3  -6  321.97   14.40
   7  -3  -6  292.07   20.30
   7  -3  -6  296.37   19.10
   7  -3  -6  282.17   15.70
  -7  -3   6  327.17   13.80
  -7   3   5  706.23   29.50
   7   3  -5  710.03   30.00
  -7   3   5  718.23   28.30
  -7   3   5  711.43   25.50
   7   3  -5  716.43   22.80
   7   3  -5  705.83   24.40
   7   3  -5  714.23   24.60
   7   3  -5  761.72   24.70
   7  -3  -5  710.03   28.70
  -7  -3   5  730.93   24.30
   7  -3  -5  714.63   30.20
   7  -3  -5  732.93   24.90
  -7   3   4   74.69    9.00
  -7   3   4  102.29   12.40
   7   3  -4   58.39    8.00
   7   3  -4   85.49   12.30
  -7   3   4   83.19    6.00
   7   3  -4   64.39    6.90
  -7  -3   4   60.99    8.40
   7  -3  -4   48.80   10.20
   7  -3  -4   75.39   11.80
   7  -3  -4   68.49    7.80
   7  -3  -4   81.99   10.80
  -7   3   3    9.80    8.00
   7   3  -3   16.40    6.40
   7   3  -3   18.80    5.20
   7   3  -3    4.10    7.90
  -7   3   3   10.90    7.80
  -7   3   3   16.40    6.60
  -7   3   3   18.80    4.30
   7  -3  -3   18.50    7.80
   7  -3  -3   11.30    5.40
  -7  -3   3    2.50    6.20
   7  -3  -3   12.80    8.60
  -7  -3   3   17.30    4.60
   7  -3  -3   12.80    7.50
   7   3  -2  849.52   31.40
  -7   3   2  836.42   24.70
  -7   3   2  863.11   28.10
  -7   3   2  876.41   31.60
  -7   3   2  782.32   30.60
   7   3  -2  795.52   25.60
   7   3  -2  875.01   29.70
  -7  -3   2  862.81   25.90
   7  -3  -2  854.81   30.60
   7  -3  -2  878.11   27.40
  -7  -3   2  834.42   29.40
   7  -3  -2  826.12   30.90
   7  -3  -2  842.52   31.60
   7   3  -1 1051.39   35.30
  -7   3   1 1041.10   33.30
   7   3  -1 1017.80   31.50
  -7   3   1 1160.98   37.50
   7   3  -1 1077.69   36.20
  -7   3   1 1053.09   36.20
  -7   3   1 1065.99   30.60
   7  -3  -1 1057.99   36.60
   7  -3  -1 1043.30   36.30
  -7  -3   1 1069.59   32.30
   7  -3  -1 1013.80   35.70
  -7  -3   1  997.00   35.00
  -7   3   0   63.09    9.00
   7   3   0   92.79   11.40
  -7   3   0   52.59    7.20
  -7   3   0   81.19   10.50
  -7   3   0  106.49   12.70
   7   3   0   82.49   10.40
   7  -3   0   77.29   10.70
  -7  -3   0   87.19   11.50
   7  -3   0   91.89   11.20
   7  -3   0  107.89   13.00
  -7   3  -1  743.53   30.90
   7   3   1  799.62   28.80
  -7   3  -1  815.52   29.50
   7   3   1  814.12   31.20
  -7   3  -1  823.32   27.60
  -7   3  -1  840.12   30.20
  -7  -3  -1  801.02   31.40
  -7  -3  -1  848.22   29.30
   7  -3   1  856.71   31.10
   7  -3   1  771.22   30.40
   7  -3   1  831.02   31.60
   7  -3   1  806.72   27.60
   7   3   2  107.89   13.70
   7   3   2   99.59   10.30
  -7   3  -2   72.19   11.80
  -7   3  -2   84.49   10.30
  -7   3  -2   85.99   11.00
  -7   3  -2   69.09   10.30
  -7  -3  -2   87.39   11.20
  -7  -3  -2   88.29   13.00
   7  -3   2   71.59   10.70
   7  -3   2   85.29   10.50
   7  -3   2  115.89   13.80
  -7   3  -3   56.89   10.90
   7   3   3   55.89    8.40
  -7   3  -3   80.19   10.70
  -7   3  -3   51.29    9.30
  -7   3  -3   47.40   11.00
   7  -3   3   73.49   12.10
   7  -3   3   50.89    9.70
   7  -3   3   70.99   10.60
  -7  -3  -3   61.89   12.50
  -7  -3  -3   57.99   11.00
  -7   3  -4   16.70    9.80
  -7   3  -4    0.50    8.90
  -7   3  -4   -2.20    6.70
   7   3   4    8.20    5.80
  -7  -3  -4   -0.20    9.10
  -7  -3  -4   15.30   10.80
   7  -3   4    0.70    8.70
   7  -3   4   14.80    8.90
  -7   3  -5  117.89   15.40
  -7   3  -5  106.89   10.90
   7   3   5  109.39    9.00
   7  -3   5  111.99   14.80
  -7  -3  -5  116.59   15.80
   7  -3   5  128.89   15.50
  -7   3  -6  157.28   16.80
   7   3   6  130.59    9.30
   7   3   6  148.49   17.90
  -7   3  -6  131.59   11.30
  -7  -3  -6  163.88   18.90
   7  -3   6  112.89   15.00
   7  -3   6  149.88   16.40
   7   3   7  421.46   27.40
  -7   3  -7  428.66   25.90
   7  -3   7  404.56   26.10
   7  -3   7  414.66   25.30
  -7  -3  -7  417.06   27.80
   7   3   8   -6.20   12.10
  -7   3  -8   37.50   12.30
   7  -3   8    7.70   10.10
   7  -3   8    1.90   10.80
  -7  -3  -8    8.70   11.90
  -7   3  -9   41.40   13.70
   7   3   9   66.19   16.70
  -7  -3  -9   55.59   15.60
   7  -3   9   96.19   17.70
  -7   3 -10   29.40   12.80
   7   3  10    0.70   13.50
  -7  -3 -10   -3.10   13.20
   7  -3  10    3.20   13.10
   7   4 -14   11.20   11.10
   7   4 -14   31.60   12.50
  -7   4  14   25.50   12.30
   7  -4 -14    1.30   11.40
   7  -4 -14    0.00   11.70
  -7   4  13   -9.00    9.70
   7   4 -13    0.50   10.80
   7   4 -13   -3.30    8.90
   7  -4 -13    4.90   11.40
   7  -4 -13    5.40   11.00
  -7   4  12    3.60    9.60
   7   4 -12   16.20    9.50
   7   4 -12    7.50   11.10
   7  -4 -12   -2.00   10.40
   7  -4 -12   15.30   10.90
   7   4 -11   -2.10   10.20
   7   4 -11    1.80    8.10
  -7   4  11   -1.50    8.30
   7  -4 -11   -0.90   10.30
   7  -4 -11   -5.80   10.10
   7   4 -10    8.30    8.30
   7   4 -10   -8.10   10.30
  -7   4  10   -0.90    7.90
   7  -4 -10    7.80   10.60
   7  -4 -10   25.50   10.90
   7   4  -9  102.09   15.70
  -7   4   9   89.59   11.10
   7   4  -9   95.39   11.30
   7   4  -9  125.19   13.60
   7  -4  -9   97.29   14.70
   7  -4  -9  101.49   14.20
   7  -4  -9   97.19   15.10
   7   4  -8   60.79    6.00
  -7   4   8   53.49   11.40
   7   4  -8   56.89   13.70
   7   4  -8   66.49    6.20
   7   4  -8   66.69   10.40
   7   4  -8   52.19    9.30
   7  -4  -8   42.70   10.90
   7  -4  -8   72.99   13.40
   7  -4  -8   48.70   12.50
   7   4  -7    7.50    5.20
   7   4  -7   23.20   11.70
   7   4  -7   15.50    7.30
  -7   4   7    8.20    8.60
   7   4  -7   13.30    5.20
   7   4  -7    0.60    7.20
   7  -4  -7   -6.80    9.60
   7  -4  -7   19.10   10.40
   7  -4  -7   25.20    8.60
   7   4  -6   49.90    8.00
   7   4  -6   42.00    6.70
   7   4  -6   49.70    7.40
   7   4  -6   41.20    8.90
   7   4  -6   32.80   10.50
  -7   4   6   45.20    9.80
   7  -4  -6   32.30   10.80
  -7  -4   6   51.49    6.80
   7  -4  -6   65.79   12.10
   7  -4  -6   28.50    8.30
  -7   4   5  757.82   28.90
   7   4  -5  784.32   25.70
   7   4  -5  723.23   25.90
   7   4  -5  764.02   32.00
   7  -4  -5  788.92   27.80
  -7  -4   5  756.62   25.30
   7  -4  -5  746.93   32.30
   7  -4  -5  754.32   31.40
  -7   4   4   38.80    9.00
  -7   4   4   -6.50    2.50
   7   4  -4    4.50    6.20
   7   4  -4    2.70    6.50
  -7   4   4    5.90    8.30
   7   4  -4   26.70   10.40
   7  -4  -4   33.40   10.50
  -7  -4   4    2.00    3.40
   7  -4  -4   11.40    8.60
  -7  -4   4    9.90    6.30
   7  -4  -4   15.10    8.40
   7  -4  -4   10.60    6.60
   7   4  -3 1266.57   42.40
  -7   4   3 1308.77   42.70
   7   4  -3 1257.37   37.20
  -7   4   3 1195.18   42.40
  -7   4   3 1219.78   39.40
   7   4  -3 1216.68   38.70
  -7   4   3 1210.88   35.00
   7  -4  -3 1171.68   42.60
  -7  -4   3 1207.58   38.30
   7  -4  -3 1234.98   41.20
   7  -4  -3 1239.78   38.20
   7  -4  -3 1232.68   42.10
   7   4  -2   59.29    8.20
  -7   4   2   43.40    9.30
  -7   4   2   64.19   11.60
   7   4  -2   61.09   11.10
  -7   4   2   48.90   10.30
   7   4  -2   73.09   10.10
   7  -4  -2   61.09   10.40
   7  -4  -2   60.59    8.40
  -7  -4   2   70.89   10.20
   7  -4  -2   47.80   11.40
   7  -4  -2   52.59   10.90
  -7   4   1  266.37   16.90
   7   4  -1  258.37   15.60
   7   4  -1  304.77   18.70
  -7   4   1  251.17   14.10
  -7   4   1  266.47   18.90
   7   4  -1  282.57   17.40
  -7   4   1  294.27   19.00
   7  -4  -1  267.67   18.70
  -7  -4   1  287.27   15.30
  -7  -4   1  258.97   16.90
   7  -4  -1  272.67   17.90
   7  -4  -1  272.67   20.40
  -7   4   0   66.39   11.60
  -7   4   0   69.69   11.70
  -7   4   0   55.59    9.90
   7   4   0   42.60    8.60
   7   4   0   32.80    9.20
   7   4   0   47.60    9.90
  -7   4   0   46.60    8.00
  -7  -4   0   47.30    9.00
   7  -4   0   59.19   10.90
   7  -4   0   42.30   11.10
  -7  -4   0   42.10   10.30
  -7   4  -1  273.77   16.30
  -7   4  -1  299.77   19.60
   7   4   1  286.27   19.30
  -7   4  -1  260.07   18.50
   7   4   1  295.27   17.70
  -7   4  -1  272.47   18.60
   7  -4   1  267.17   19.10
   7  -4   1  303.77   20.30
  -7  -4  -1  261.97   18.40
  -7  -4  -1  314.47   20.40
  -7   4  -2   79.89   12.30
   7   4   2  106.49   14.20
  -7   4  -2   98.79   11.30
   7   4   2   88.19   10.80
  -7   4  -2  102.99   12.60
  -7  -4  -2   78.69   12.30
  -7  -4  -2   90.19   13.70
   7  -4   2  100.59   13.50
   7  -4   2   77.09   11.90
   7  -4   2   97.59   11.60
  -7   4  -3  372.76   21.00
  -7   4  -3  377.26   22.60
  -7   4  -3  405.86   23.30
   7   4   3  407.36   19.50
  -7   4  -3  374.86   21.00
  -7  -4  -3  375.16   23.20
   7  -4   3  364.56   20.70
   7  -4   3  383.06   22.40
  -7  -4  -3  405.46   24.40
  -7   4  -4   -2.40    7.90
  -7   4  -4   23.20   10.80
  -7   4  -4   13.70   10.10
   7   4   4   14.80    7.00
   7  -4   4   17.30    9.80
  -7  -4  -4   23.90   12.10
   7  -4   4    2.20    9.00
  -7   4  -5  438.76   26.40
   7   4   5  420.46   18.60
  -7   4  -5  423.96   24.20
  -7   4  -5  438.26   21.70
  -7  -4  -5  460.95   27.80
   7  -4   5  476.95   25.20
   7  -4   5  431.76   24.80
  -7   4  -6    9.60    9.80
  -7   4  -6    6.10    7.30
  -7   4  -6   24.90   11.40
   7   4   6   18.60    5.90
   7  -4   6   13.50   10.40
  -7  -4  -6   -0.40   11.50
   7  -4   6   11.80   10.10
  -7   4  -7   61.79   13.40
  -7   4  -7   83.89   16.40
   7   4   7   55.09   15.50
   7  -4   7   36.50   13.00
  -7  -4  -7   76.09   16.60
   7  -4   7   47.30   12.20
   7   4   8   26.90   14.00
  -7   4  -8   17.30   13.00
  -7   4  -8  -10.80   10.20
   7  -4   8   -1.00   11.60
  -7  -4  -8   10.70   13.60
  -7   4  -9   67.69   14.60
   7   4   9   74.79   18.20
  -7   4  -9   50.79   15.20
  -7  -4  -9   83.79   18.10
   7  -4   9   66.39   16.60
   7   5 -13   21.70   11.60
  -7   5  13   38.70   12.70
   7   5 -13   26.50   12.50
   7  -5 -13   29.30   13.40
   7  -5 -13   42.90   14.10
  -7   5  12    8.70   10.30
   7   5 -12    9.40   12.10
   7   5 -12    2.40   10.20
   7  -5 -12   -0.20   11.30
   7  -5 -12    9.20   11.60
  -7   5  11    1.00    9.00
   7   5 -11    1.20   10.80
   7   5 -11    8.00    9.30
   7  -5 -11    2.60   11.40
   7  -5 -11    5.80   11.40
   7   5 -10   47.10   13.90
   7   5 -10   55.79   11.30
   7  -5 -10   42.20   13.90
   7  -5 -10   41.80   13.10
  -7   5   9   25.70   11.20
   7   5  -9   27.70    9.60
   7   5  -9   32.20   12.70
   7  -5  -9   22.90   12.40
   7  -5  -9   20.10   12.20
   7   5  -8   -2.50   11.00
   7   5  -8   -0.60    3.90
   7   5  -8    1.20    3.80
   7   5  -8    2.60    7.80
  -7   5   8    5.70    9.70
   7  -5  -8   -7.30   10.70
   7  -5  -8   -6.80   10.10
   7   5  -7  595.04   25.90
  -7   5   7  569.34   27.80
   7   5  -7  575.34   30.10
   7   5  -7  573.34   19.40
   7   5  -7  589.44   25.20
   7   5  -7  554.74   19.70
   7  -5  -7  550.64   28.70
   7  -5  -7  598.44   30.90
   7  -5  -7  545.05   26.50
   7   5  -6   29.20   12.00
  -7   5   6   11.70    9.90
   7   5  -6   19.30    8.40
   7   5  -6   13.80    6.00
   7   5  -6   -3.50    7.40
   7  -5  -6    3.80    8.40
   7  -5  -6   23.60   12.00
   7  -5  -6   14.80   10.10
  -7  -5   6   -4.00    5.10
   7   5  -5  668.33   26.30
  -7   5   5  612.14   28.90
   7   5  -5  663.83   23.90
   7   5  -5  647.74   31.40
  -7  -5   5  689.23   24.90
   7  -5  -5  596.64   31.30
   7  -5  -5  687.53   30.80
  -7  -5   5  678.93   23.50
   7  -5  -5  694.33   27.50
  -7   5   4   97.09   13.20
   7   5  -4   97.29   10.50
   7   5  -4   94.29   14.20
   7   5  -4   89.39   11.00
  -7  -5   4   77.79    9.50
   7  -5  -4   88.89   11.30
  -7  -5   4   87.29    9.80
   7  -5  -4   97.59   15.40
   7  -5  -4   76.99   12.20
   7   5  -3   -6.20    8.70
  -7   5   3   -6.30    8.70
  -7   5   3   -5.60    5.70
   7   5  -3    1.40    7.10
   7   5  -3   13.00    7.90
  -7   5   3   16.20    8.70
   7  -5  -3   -0.60    6.50
   7  -5  -3    8.90    9.70
   7  -5  -3    8.40    9.50
  -7  -5   3    4.70    6.20
  -7  -5   3    0.20    7.10
   7   5  -2    8.50    8.90
   7   5  -2    6.50    7.70
  -7   5   2    9.30    9.40
  -7   5   2    8.80    6.20
   7   5  -2    3.60    7.50
  -7   5   2    7.60    9.10
   7  -5  -2   -4.40    9.90
  -7  -5   2   -3.20    7.40
   7  -5  -2   10.40    8.40
   7  -5  -2    4.50    6.80
  -7  -5   2   -2.60    6.20
   7   5  -1  486.65   24.50
  -7   5   1  517.85   25.70
   7   5  -1  488.35   22.70
  -7   5   1  468.65   24.00
   7   5  -1  481.45   23.30
  -7   5   1  470.45   20.50
  -7  -5   1  436.56   23.20
  -7  -5   1  487.05   21.80
   7  -5  -1  458.15   26.40
   7  -5  -1  501.35   22.80
   7  -5  -1  467.45   24.90
   7   5   0   46.00   10.70
  -7   5   0   33.30    8.70
   7   5   0   72.29   11.10
  -7   5   0   45.00   11.10
  -7   5   0   50.69   11.70
   7   5   0   34.50    9.90
   7  -5   0   53.99   12.30
  -7  -5   0   24.30    9.00
  -7  -5   0   36.50   10.50
   7  -5   0   50.39   10.80
  -7   5  -1  379.06   23.20
   7   5   1  427.56   23.10
   7   5   1  374.96   22.20
   7   5   1  384.86   21.60
  -7   5  -1  374.66   23.10
  -7   5  -1  399.46   20.40
  -7  -5  -1  374.76   22.00
   7  -5   1  371.16   23.90
   7  -5   1  407.46   22.70
  -7  -5  -1  360.36   22.50
   7   5   2   55.79   11.80
   7   5   2   87.69   13.70
  -7   5  -2   60.29   10.70
   7   5   2   61.49   10.70
  -7   5  -2   57.19   12.30
  -7  -5  -2   72.59   12.70
  -7  -5  -2   41.70   11.80
   7  -5   2   56.39   12.40
  -7   5  -3   14.40    9.60
  -7   5  -3   -6.30    9.60
   7   5   3    0.30    7.40
  -7  -5  -3    0.70   10.50
   7  -5   3    3.50    8.90
  -7   5  -4    1.40    8.50
  -7   5  -4   19.50   11.00
   7   5   4    6.40    7.10
  -7  -5  -4   -1.90   10.10
   7  -5   4   15.70    9.70
   7   5   5   83.59   10.40
  -7   5  -5   92.79   12.90
  -7   5  -5   74.29   14.80
   7  -5   5  105.89   14.70
  -7  -5  -5   91.49   16.70
   7  -5   5  100.79   14.60
   7   5   6   24.80    7.20
  -7   5  -6   10.60   12.60
  -7  -5  -6    9.20   13.20
   7  -5   6   32.30   11.70
   7  -5   6   30.50   12.00
  -7   5  -7  393.56   29.50
  -7  -5  -7  406.96   29.10
   7  -5   7  340.27   26.70
  -7   5  -8   16.40   14.10
   7   5   8   -1.70   14.40
  -7   5  -8   22.90   11.50
  -7  -5  -8    8.50   13.10
   7  -5   8   -4.00   11.90
  -7   5  -9   31.20   15.20
   7   5   9    1.00   14.20
  -7   5  -9    7.80   11.40
  -7  -5  -9   17.40   15.00
   7  -5   9   29.80   14.50
   7   6 -13   26.70   12.30
   7   6 -13   -5.40   12.00
  -7   6  13   -0.10   11.90
   7  -6 -13    5.90   12.80
   7  -6 -13   10.70   12.20
  -7   6  12   12.00   11.40
   7   6 -12   19.90   11.40
   7   6 -12   21.70   13.30
   7  -6 -12   19.40   12.90
   7  -6 -12    7.90   12.70
   7   6 -11   -0.70   10.10
   7   6 -11    2.10   13.10
   7  -6 -11    1.00   11.70
   7  -6 -11   -9.50   11.60
   7   6 -10   72.39   15.40
  -7   6  10   55.09   14.00
   7   6 -10   51.29   12.00
   7  -6 -10   53.79   14.80
   7  -6 -10   53.29   14.80
  -7   6   9   79.49   14.80
   7   6  -9  112.59   17.30
   7   6  -9   83.99   13.50
   7  -6  -9   96.29   16.50
   7  -6  -9   97.49   16.50
  -7   6   8   82.49   14.30
   7   6  -8   54.79    5.60
   7   6  -8   71.79    5.80
   7   6  -8   72.39   12.10
   7   6  -8   60.39   14.90
   7  -6  -8   87.19   15.80
   7  -6  -8   65.09   14.90
   7   6  -7    1.80   11.50
   7   6  -7   29.20   10.10
   7   6  -7   17.00    5.80
  -7   6   7   17.40   12.10
   7  -6  -7   19.00   12.40
  -7  -6   7   30.40    5.20
   7  -6  -7    5.60   11.30
  -7   6   6    6.70   11.50
   7   6  -6   -4.40   10.30
   7   6  -6   11.80    6.20
   7   6  -6   -0.80    8.60
  -7  -6   6    7.90    5.80
   7  -6  -6    6.60   11.90
   7  -6  -6    8.10   10.70
  -7   6   5  503.35   27.60
   7   6  -5  418.96   27.30
   7   6  -5  451.95   20.20
   7   6  -5  482.25   25.30
   7  -6  -5  475.95   29.80
  -7  -6   5  486.15   20.00
   7  -6  -5  491.95   28.10
  -7  -6   5  521.05   22.80
   7   6  -4  347.97   18.30
   7   6  -4  344.87   22.10
   7   6  -4  366.86   25.00
  -7   6   4  316.17   24.80
  -7  -6   4  361.36   18.40
   7  -6  -4  341.77   24.10
  -7  -6   4  403.16   20.00
   7  -6  -4  341.87   26.60
   7   6  -3  274.97   20.20
   7   6  -3  214.88   19.60
  -7   6   3  211.28   19.10
   7   6  -3  288.67   17.40
  -7  -6   3  271.67   17.10
   7  -6  -3  209.68   20.20
   7  -6  -3  269.47   20.50
   7  -6  -3  263.37   20.10
  -7  -6   3  278.67   17.80
   7   6  -2   94.89   12.40
  -7   6   2   85.29   11.20
   7   6  -2  100.89   13.10
   7   6  -2   88.49   14.00
  -7   6   2  117.89   14.90
   7  -6  -2   86.69   14.80
  -7  -6   2  105.89   12.10
   7  -6  -2   91.09   14.60
  -7  -6   2   85.39   12.20
   7   6  -1   71.09   12.40
  -7   6   1   32.30    8.90
   7   6  -1   69.49   11.90
  -7   6   1   57.19   12.30
   7   6  -1   49.00   12.00
  -7   6   1   67.79   12.70
   7  -6  -1   32.60   12.00
   7  -6  -1   66.19   13.20
  -7  -6   1   57.99   10.60
  -7  -6   1   52.89   11.50
   7   6   0   -3.60    9.40
  -7   6   0    7.80    8.00
   7   6   0   13.10    9.10
  -7   6   0    6.00   10.00
  -7   6   0   -8.20    9.70
   7   6   0    5.40    9.50
   7  -6   0   -0.10    9.80
  -7  -6   0    6.40    9.60
  -7  -6   0   -3.20    8.10
  -7   6  -1  108.99   15.00
  -7   6  -1  101.89   13.40
  -7   6  -1  112.99   15.40
   7   6   1   92.99   13.70
   7   6   1   75.49   12.90
   7   6   1  137.69   15.70
   7  -6   1   96.09   14.30
  -7  -6  -1   97.29   15.00
   7   6   2  109.89   13.30
  -7   6  -2  105.39   15.50
   7   6   2   99.99   14.70
  -7   6  -2  114.09   15.50
  -7  -6  -2  120.49   16.50
   7  -6   2  119.39   15.70
   7   6   3  128.99   13.90
  -7   6  -3  120.09   16.50
  -7  -6  -3  121.99   16.90
   7  -6   3  126.79   15.40
  -7   6  -4   90.89   15.70
   7   6   4   87.49   11.60
  -7  -6  -4   84.09   16.50
   7  -6   4  110.29   14.60
   7   6   5  206.78   16.70
  -7   6  -5  148.39   18.70
   7  -6   5  163.58   17.30
  -7  -6  -5  195.78   20.60
  -7   6  -6  154.08   20.20
   7   6   6  123.09   12.70
  -7  -6  -6  126.59   19.80
  -7   6  -7   -3.60   13.00
  -7  -6  -7    6.30   13.80
  -7   6  -8   16.30   15.00
  -7  -6  -8   -8.80   13.20
   7   7 -12  -12.50   10.60
   7   7 -12   -8.80   12.70
   7  -7 -12   -4.20   11.90
   7  -7 -12    2.80   12.90
   7   7 -11    9.30   11.20
   7   7 -11   -6.00   12.80
   7  -7 -11   13.70   13.10
   7  -7 -11    5.40   13.50
  -7   7  10   10.00   12.50
   7   7 -10   -3.90   10.10
   7   7 -10    9.50   12.80
   7  -7 -10    7.90   13.10
   7  -7 -10    9.80   12.30
   7   7  -9   -0.20   12.50
   7   7  -9   -1.50    9.90
  -7   7   9    2.90   12.20
   7  -7  -9   -0.50   12.80
   7  -7  -9   17.50   12.80
   7   7  -8    5.40   10.40
  -7   7   8    0.20   12.00
   7   7  -8    8.70   12.40
   7   7  -8   11.40    4.60
   7  -7  -8   18.60   13.40
   7  -7  -8   -7.60   12.20
   7   7  -7   50.49   14.40
  -7   7   7   57.69   14.70
   7   7  -7   47.40   11.90
   7  -7  -7   37.30   13.80
   7  -7  -7   40.50   13.60
   7   7  -6  225.18   18.60
   7   7  -6  230.68   14.40
  -7   7   6  245.98   21.80
   7   7  -6  223.98   21.90
   7  -7  -6  183.58   20.60
   7  -7  -6  230.58   22.40
   7   7  -5    8.70    7.10
   7   7  -5    9.20   12.00
  -7   7   5    2.50   12.10
   7   7  -5    9.90   10.50
   7  -7  -5   15.10   11.50
  -7  -7   5    9.20    6.70
   7  -7  -5   11.40   12.50
  -7   7   4   19.20   13.00
   7   7  -4   19.70   11.90
   7   7  -4   21.50   10.90
   7   7  -4   34.60    9.10
  -7  -7   4   22.30    8.30
   7  -7  -4   23.40   12.10
   7  -7  -4   26.10   12.90
  -7   7   3    7.70   12.20
   7   7  -3    8.80    8.50
   7   7  -3   22.00   10.90
   7  -7  -3   14.70   11.60
  -7  -7   3   17.50    8.80
  -7   7   2  128.29   13.70
  -7   7   2  156.08   18.20
   7   7  -2  144.19   14.80
   7   7  -2  179.28   17.20
   7  -7  -2  134.29   17.40
  -7  -7   2  130.49   14.30
   7   7  -1   63.09   12.10
  -7   7   1   54.79   13.30
   7   7  -1   44.70   12.20
   7  -7  -1   54.69   12.80
  -7  -7   1   57.19   12.30
   7   7   0  363.76   22.80
  -7   7   0  354.26   26.30
   7   7   0  328.27   24.00
  -7   7   0  362.96   27.30
   7  -7   0  356.76   23.90
  -7  -7   0  377.96   23.20
   7   7   1   51.49   12.90
  -7   7  -1   28.40   12.00
  -7   7  -1   47.70   13.80
  -7  -7  -1   49.60   12.90
   7  -7   1   46.90   12.30
   7   7   2  108.99   15.80
  -7   7  -2  109.09   15.90
  -7   7  -2   94.89   16.20
   7  -7   2  132.09   16.20
  -7  -7  -2  119.39   17.40
  -7   7  -3  -11.60   11.50
   7   7   3   10.00   11.50
   7   7   3    6.30    8.90
  -7  -7  -3    3.40   12.30
   7  -7   3   10.30   10.70
  -7   7  -4   -5.60   12.10
   7   7   4    0.50    8.20
   7  -7   4   -3.40    9.70
  -7  -7  -4  -16.10   10.90
  -7   7  -5   12.50   13.20
   7   7   5   20.90    9.30
  -7  -7  -5    6.10   13.60
  -7   7  -6   75.89   17.20
  -7  -7  -6   52.39   15.50
  -7   7  -7   17.80   15.10
  -7  -7  -7   -4.80   14.60
  -7   8  10   31.00   14.70
   7   8 -10   31.60   13.50
   7   8 -10   11.80   14.40
   7  -8 -10   27.40   14.40
  -7   8   9    0.00   13.30
   7   8  -9   -9.90   11.30
   7   8  -9   -3.90   12.70
   7  -8  -9  -18.70   12.80
  -7   8   8   35.60   14.90
   7   8  -8   18.70   13.40
   7   8  -8   10.70   12.20
   7  -8  -8   28.60   14.30
   7   8  -7    9.70   11.70
  -7   8   7    7.20   13.50
   7   8  -7   19.30   13.70
   7  -8  -7    1.00   12.20
  -7   8   6   16.20   14.00
   7   8  -6  -25.30   10.50
   7   8  -6    8.20   12.10
   7  -8  -6   -5.30   11.10
  -7   8   5   -1.10   13.90
   7   8  -5    4.30   11.40
   7   8  -5    5.90   11.70
   7  -8  -5   14.80   12.80
  -7   8   4   50.99   15.70
   7   8  -4   62.39   14.50
   7  -8  -4   92.89   17.20
  -7   8   3   12.30   13.60
   7   8  -3    6.20   11.00
   7  -8  -3   -6.90   10.40
  -7  -8   3    3.70    8.30
  -7   8   2  101.69   17.30
   7   8  -2   77.49   15.10
  -7  -8   2  100.39   13.70
   7  -8  -2   73.19   14.40
   7   8  -1   34.20   12.60
   7   8  -1   40.90   12.50
  -7   8   1   27.10   13.80
   7  -8  -1   17.60   11.60
  -7  -8   1   46.90   12.00
   7   8   0   -0.30   11.60
  -7   8   0    3.10   12.70
   7   8   0   -1.00    9.70
   7  -8   0   -0.10   10.50
  -7  -8   0    7.40   10.30
  -7   8  -1    7.40   13.00
   7   8   1   16.60   12.40
   7  -8   1   14.00   11.00
  -7  -8  -1  -13.80   10.70
  -7   8  -2   50.29   15.50
   7   8   2   56.89   13.90
  -7  -8  -2   44.20   14.60
   7  -8   2   55.09   13.60
   7   8   3   17.50   13.00
  -7   8  -3    8.80   13.60
  -7  -8  -3    3.20   12.30
   7  -8   3    8.00   10.90
   7   8   4   16.90   14.00
  -7   8  -4   20.30   14.20
  -7  -8  -4    0.90   13.40
  -7   8  -5    4.90   14.40
   7   8   5   -7.40    9.20
  -7  -8  -5    8.40   15.10
  -7   8  -6   -7.90   14.10
  -7  -8  -6   16.30   14.70
   7   9  -9  -22.40   12.30
   7   9  -9   -3.80   13.30
  -7   9   9   15.60   15.10
  -7   9   8   14.00   14.70
   7   9  -8   -2.40   13.80
   7   9  -8   -6.00   12.90
   7  -9  -8   -8.40   13.00
   7   9  -7   -4.20   12.30
  -7   9   7    6.70   13.90
   7   9  -7  -13.20   12.30
   7  -9  -7    2.40   14.00
  -7   9   6   89.59   19.30
   7   9  -6   82.69   17.40
   7   9  -6  127.69   20.00
   7  -9  -6   82.49   17.80
  -7   9   5   -6.60   14.10
   7   9  -5  -18.20   12.50
   7  -9  -5  -14.70   11.20
   7   9  -4   15.80   14.30
  -7   9   4  -10.00   14.60
   7  -9  -4    1.80   12.40
  -7   9   3   10.90   15.80
   7   9  -3   -6.90   12.40
   7  -9  -3    0.40   12.20
  -7   9   2   40.10   16.80
   7   9  -2   23.90   14.00
   7  -9  -2   63.79   15.90
  -7   9   1   -5.50   14.30
   7   9  -1    5.50   12.00
   7  -9  -1    0.50   11.90
  -7  -9   1    2.20   11.60
   7   9   0   39.20   15.30
  -7   9   0   42.40   16.60
   7  -9   0   45.20   14.10
  -7  -9   0   57.99   14.90
  -7   9  -1   14.20   15.00
   7   9   1    7.10   13.60
  -7  -9  -1    0.20   11.80
   7  -9   1   -7.60   10.40
   7   9   2   -8.10   12.90
  -7   9  -2   -1.40   14.30
  -7  -9  -2   10.70   12.50
   7   9   3   -5.30   13.00
  -7   9  -3   -7.20   14.60
  -7  -9  -3    7.00   13.70
   7   9   4   -5.40   12.60
  -7   9  -4   16.20   15.80
  -7  -9  -4   -2.80   14.20
  -7  10   6  -28.80   15.10
   7  10  -6   -6.00   14.80
   7 -10  -6    5.90   14.70
   7  10  -5    6.50   14.70
  -7  10   5   16.10   17.50
   7 -10  -5    4.10   14.20
  -7  10   4   -4.10   16.10
   7  10  -4   20.60   15.00
   7 -10  -4   11.20   13.90
  -7  10   3   27.10   17.50
   7  10  -3   12.20   14.90
   7 -10  -3    8.50   14.10
  -7  10   2   30.60   18.50
   7  10  -2   47.50   17.30
   7 -10  -2   52.09   15.70
   7  10  -1  -13.10   13.20
  -7  10   1  -25.50   14.70
   7 -10  -1   -9.50   12.20
  -7  10   0  -10.90   14.90
   7  10   0   -7.40   14.00
   7  10   1    5.80   14.40
  -7  10  -1  -25.00   14.30
   8   0 -15  -10.20   10.90
   8   0 -15    9.50    8.40
  -8   0  15    2.10   11.00
  -8   0  14   47.00   11.70
   8   0 -14   21.80   12.40
   8   0 -14   30.20    9.30
   8   0 -13   -7.30    6.80
  -8   0  13   10.30    9.30
   8   0 -13   -0.30   10.70
   8   0 -12   40.80   12.30
   8   0 -12   75.19   11.00
  -8   0  12   83.69   11.60
   8   0 -12   68.09   11.80
   8   0 -11    8.00    6.70
   8   0 -11   -7.10    6.90
  -8   0  11   -3.40    6.90
   8   0 -11   -1.70    9.90
   8   0 -11    9.50    7.90
   8   0 -10   99.79   10.70
   8   0 -10   80.99   10.60
  -8   0  10   81.29    9.70
   8   0 -10  108.99   15.80
   8   0 -10   91.79   11.00
  -8   0   9    1.70    5.50
   8   0  -9    3.60    7.10
   8   0  -9   -6.20    6.30
   8   0  -9    3.10   10.00
   8   0  -9   -0.90    6.30
   8   0  -8  155.48   16.10
   8   0  -8  140.29   11.20
   8   0  -8  141.19   12.30
   8   0  -8  142.29   12.80
  -8   0   8  136.39   12.20
   8   0  -7   -0.80    9.40
   8   0  -7    2.50    4.50
   8   0  -7    1.90    6.50
   8   0  -7   -0.20    6.20
  -8   0   7   -2.60    6.20
  -8   0   7    8.70    8.80
   8   0  -6 1764.12   54.69
  -8   0   6 1752.22   50.99
  -8   0   6 1741.73   53.99
   8   0  -6 1717.53   50.59
   8   0  -6 1689.13   50.89
  -8   0   5   -1.60    1.70
   8   0  -5   -8.50    5.70
   8   0  -5   -1.40    8.40
   8   0  -5   -0.10    6.70
   8   0  -4  382.26   18.00
  -8   0   4  340.67   18.10
   8   0  -4  310.67   19.60
  -8   0   4  336.27   19.10
   8   0  -4  336.17   18.20
   8   0  -3    0.50    7.20
   8   0  -3    7.70    7.10
  -8   0   3   -3.10    7.30
  -8   0   3   -4.80    6.80
   8   0  -3    5.30    6.00
   8   0  -2    4.20    7.00
   8   0  -2    0.20    3.40
   8   0  -2   -0.50    6.90
  -8   0   2    4.30    2.70
  -8   0   2    4.60    6.80
   8   0  -2   -4.90    6.40
  -8   0   2    2.00    6.80
  -8   0   2    3.40    3.00
   8   0  -1  -10.20    5.70
   8   0  -1    4.90    7.90
   8   0  -1    3.70    4.40
   8   0  -1    9.80    7.10
  -8   0   1    6.70    8.00
  -8   0   1    9.40    6.50
   8   0   0 1038.70   35.60
  -8   0   0 1130.29   35.90
   8   0   0 1098.19   38.60
  -8   0   0 1136.59   38.70
   8   0   0 1101.29   32.70
   8   0   0 1130.19   38.00
   8   0   1    1.30    5.80
   8   0   1    1.80    6.50
  -8   0  -1    9.80    8.70
  -8   0  -1   -0.10    5.50
   8   0   1    3.00    7.50
  -8   0  -2  268.57   15.10
   8   0   2  272.37   15.60
  -8   0  -2  300.47   20.30
   8   0   2  265.47   16.50
  -8   0  -3    3.90    9.40
   8   0   3    0.20    6.10
   8   0   3   11.30    8.30
  -8   0  -3    5.90    5.60
   8   0   4   24.60    7.10
   8   0   4   32.30   10.00
  -8   0  -4    8.00    9.60
  -8   0  -4   23.50    6.30
  -8   0  -5  -10.60    9.30
   8   0   5  -13.70    4.90
   8   0   5    0.60    9.30
   8   0   6  385.66   24.50
  -8   0  -6  414.26   25.60
   8   0   7    6.30   11.00
  -8   0  -7   -9.70   10.00
   8   0   8  516.05   31.20
  -8   0  -8  531.85   30.50
  -8   0  -9   20.80   12.30
   8   0   9   -9.40   12.20
   8   1 -15    7.00    6.90
  -8   1  15    6.50   10.70
   8   1 -15  -12.00   10.20
   8  -1 -15  -15.40   10.90
   8  -1 -15    2.70    9.10
  -8  -1  15    4.40   11.10
   8   1 -14   11.50   11.70
   8   1 -14   40.90    8.40
  -8   1  14   38.00   11.70
   8  -1 -14   42.70   13.40
  -8  -1  14   34.30   12.00
   8  -1 -14   51.19   11.30
  -8   1  13    6.60    8.80
   8   1 -13  -12.00    6.20
   8   1 -13   11.90   11.10
   8  -1 -13    2.10    8.50
  -8  -1  13  -10.60    8.60
   8  -1 -13    5.30   10.70
  -8   1  12   -1.50    7.40
   8   1 -12    0.90    6.80
   8   1 -12   11.70    8.10
   8   1 -12    5.50   10.70
   8  -1 -12  -10.80    9.90
   8  -1 -12    6.40    8.60
  -8  -1  12    5.70    8.20
   8   1 -11   17.20    6.60
   8   1 -11   19.10   11.30
   8   1 -11   17.80    7.90
   8   1 -11   11.60    7.10
  -8   1  11   21.10    7.80
   8  -1 -11   17.50   10.80
  -8  -1  11   12.70    7.90
   8  -1 -11   14.60    8.90
   8  -1 -11   21.40    9.70
   8   1 -10  119.19   11.40
   8   1 -10   99.19   10.00
   8   1 -10  124.79   15.40
   8   1 -10  100.09   10.50
  -8   1  10  104.79   10.20
   8   1 -10   93.39   10.60
   8  -1 -10   83.69   12.10
   8  -1 -10  107.19   15.20
   8  -1 -10  109.99   12.20
  -8   1   9    9.50    5.60
   8   1  -9   10.80    6.30
   8   1  -9    8.30    6.40
   8   1  -9    2.20    6.70
   8   1  -9   -6.00    9.60
   8   1  -9   12.00    6.20
   8  -1  -9    7.80    7.30
   8  -1  -9   20.80   10.80
   8  -1  -9    9.10    7.10
   8  -1  -9    2.00    7.80
   8   1  -8 1228.58   44.40
   8   1  -8 1257.47   38.60
   8   1  -8 1281.67   36.40
   8   1  -8 1303.57   36.70
  -8   1   8 1200.78   34.50
   8   1  -8 1240.98   38.80
   8  -1  -8 1344.97   41.00
   8  -1  -8 1291.97   41.60
   8  -1  -8 1323.17   38.10
   8  -1  -8 1235.08   44.80
   8   1  -7    1.00    9.40
   8   1  -7    1.50    6.20
   8   1  -7   10.00    4.80
   8   1  -7    6.20    4.20
   8   1  -7   -0.60    3.50
   8   1  -7    3.30    5.60
  -8   1   7   -5.80    6.50
   8  -1  -7   -2.90    5.00
   8  -1  -7    8.30    6.70
   8  -1  -7    7.10    8.80
   8  -1  -7    2.40    7.50
   8   1  -6   39.40    8.20
   8   1  -6   30.10    4.80
  -8   1   6   30.90    9.30
  -8   1   6   36.70    8.50
   8   1  -6   42.20    7.60
   8   1  -6   20.80    8.90
   8  -1  -6   26.60    8.40
   8  -1  -6   40.30    8.70
   8  -1  -6   25.40   10.00
  -8  -1   6   15.80    8.20
   8  -1  -6   30.40    4.70
   8   1  -5  153.28   12.30
   8   1  -5  134.79   14.10
  -8   1   5  158.08   13.60
   8   1  -5  142.69    7.40
   8   1  -5  145.39   11.90
   8  -1  -5  135.89   13.40
   8  -1  -5  134.39   12.50
   8  -1  -5  136.09   14.10
   8  -1  -5  139.19    6.60
  -8  -1   5  163.18   12.90
  -8   1   4  752.82   29.50
   8   1  -4  873.21   32.60
  -8   1   4  920.61   32.60
   8   1  -4  875.21   30.00
   8   1  -4  878.91   30.70
   8  -1  -4  882.31   31.40
   8  -1  -4  871.31   30.90
  -8  -1   4  923.01   30.60
  -8  -1   4  924.61   32.50
   8  -1  -4  882.11   33.00
  -8   1   3   79.89   11.20
  -8   1   3   96.59   11.80
   8   1  -3   64.49    9.80
   8   1  -3  104.59   11.70
   8   1  -3   84.89   10.20
  -8   1   3   98.69    6.70
   8  -1  -3   82.39   11.40
   8  -1  -3   85.99   11.90
  -8  -1   3   73.19   10.20
   8  -1  -3   77.49   10.20
  -8  -1   3   79.09   10.30
   8   1  -2 1437.46   45.10
  -8   1   2 1427.06   45.30
  -8   1   2 1438.06   38.50
   8   1  -2 1440.66   44.70
  -8   1   2 1511.35   45.50
   8   1  -2 1391.36   44.90
   8  -1  -2 1310.47   44.50
   8  -1  -2 1425.46   36.70
   8  -1  -2 1500.55   45.90
  -8  -1   2 1388.06   44.70
   8  -1  -2 1441.26   45.30
  -8  -1   2 1503.85   45.40
  -8  -1   2 1468.25   37.10
  -8   1   1   14.30    7.20
  -8   1   1   14.50    4.80
   8   1  -1   11.60    7.40
   8   1  -1   12.80    7.80
  -8   1   1   11.20    8.60
  -8  -1   1    5.20    6.30
   8  -1  -1    4.00    4.30
   8  -1  -1   11.00    7.60
   8  -1  -1    8.20    8.30
  -8  -1   1   12.00    4.50
   8  -1  -1    9.60    7.50
  -8  -1   1    6.60    8.00
   8   1   0  547.05   20.80
   8   1   0  556.24   23.10
  -8   1   0  522.15   25.10
   8   1   0  585.94   24.90
  -8   1   0  569.84   20.50
  -8   1   0  541.35   22.90
   8  -1   0  561.44   24.80
   8  -1   0  582.54   23.90
  -8  -1   0  551.94   24.70
  -8  -1   0  584.74   20.10
   8  -1   0  560.84   25.50
   8  -1   0  545.45   19.80
  -8  -1   0  561.54   22.80
  -8   1  -1   42.70    8.10
   8   1   1   52.59    8.80
   8   1   1   43.30    8.40
  -8   1  -1   63.19   11.80
   8   1   1   57.39   11.00
   8  -1   1   48.20    8.20
   8  -1   1   56.99    9.20
  -8  -1  -1   59.09   11.30
   8  -1   1   56.29   11.80
  -8  -1  -1   51.09    7.90
   8  -1   1   71.99   12.00
  -8  -1  -1   51.99    8.10
   8   1   2  113.79   12.20
  -8   1  -2  112.29   14.10
   8   1   2  108.59   10.60
  -8   1  -2  110.49   10.90
   8  -1   2  109.59   11.30
   8  -1   2  109.99   11.20
  -8  -1  -2  118.79   11.40
  -8  -1  -2  105.99   10.30
   8  -1   2  123.39   15.10
  -8  -1  -2  130.19   14.80
   8   1   3    4.80    8.50
   8   1   3   16.90    6.80
  -8   1  -3   16.90   10.40
  -8   1  -3   19.40    6.60
  -8  -1  -3   -4.50    7.40
  -8  -1  -3   11.10   10.20
   8  -1   3   12.30    7.20
   8  -1   3    3.40    9.70
   8  -1   3   -1.00    7.50
   8   1   4  629.04   28.00
   8   1   4  660.03   22.90
  -8   1  -4  620.94   29.90
  -8   1  -4  664.53   23.40
   8  -1   4  664.63   28.30
  -8  -1  -4  631.54   28.30
   8  -1   4  618.44   30.10
  -8  -1  -4  611.64   30.30
   8  -1   4  648.84   23.90
   8   1   5  131.49   15.40
  -8   1  -5  144.29   10.80
   8   1   5  146.79   10.60
  -8   1  -5   99.89   15.70
   8  -1   5  142.39   16.80
  -8  -1  -5  127.99   17.20
   8  -1   5  154.18   11.60
   8  -1   5  132.89   15.40
   8   1   6  249.48   21.10
  -8   1  -6  238.38   21.20
  -8   1  -6  286.57   12.30
   8  -1   6  269.17   21.70
   8  -1   6  289.67   22.20
  -8  -1  -6  236.38   21.80
   8   1   7   -6.60   10.40
  -8   1  -7    8.30   10.90
  -8  -1  -7    7.90   11.10
   8  -1   7   -0.60   10.60
   8   1   8   -9.70   11.10
  -8   1  -8    1.90   11.60
   8  -1   8    5.10   11.60
  -8  -1  -8   -3.20   11.30
   8  -1   8   22.70   12.10
  -8   1  -9    1.10   11.80
   8   1   9    7.50   13.30
  -8  -1  -9   -0.50   12.10
   8  -1   9   11.10   13.00
   8   2 -15   -2.50   11.40
  -8   2  15  -14.10   10.00
  -8  -2  15  -10.20   11.50
   8  -2 -15    2.30   11.60
   8  -2 -15    7.90    9.90
   8   2 -14   61.39   14.50
  -8   2  14   56.19   12.40
   8   2 -14   38.00    6.40
   8  -2 -14   22.70   12.30
  -8  -2  14   25.50   12.40
   8  -2 -14   31.10   11.60
   8   2 -13    6.60    5.50
   8   2 -13   -6.50   10.20
  -8   2  13   13.10    9.50
   8  -2 -13    2.70    9.30
  -8  -2  13    5.10    9.80
   8  -2 -13    9.70   11.40
   8   2 -12  178.38   11.50
   8   2 -12  191.68   19.80
  -8   2  12  190.88   15.40
   8  -2 -12  167.58   16.60
   8  -2 -12  180.28   19.10
   8   2 -11   56.99   13.30
   8   2 -11   58.29    7.80
  -8   2  11   72.09   10.10
   8   2 -11   58.99   10.50
   8   2 -11   59.19    7.30
   8  -2 -11   73.89   12.10
   8  -2 -11   48.40   13.40
   8  -2 -11   77.29   12.60
   8   2 -10  162.08   11.90
   8   2 -10  170.78   11.50
   8   2 -10  202.88   15.20
   8   2 -10  161.08   17.50
  -8   2  10  184.18   13.50
   8  -2 -10  157.38   14.80
   8  -2 -10  164.78   17.50
   8  -2 -10  179.78   16.30
   8   2  -9   15.40    5.80
  -8   2   9    4.70    5.80
   8   2  -9   16.20    7.20
   8   2  -9   14.40    6.40
   8   2  -9   10.00   10.50
   8   2  -9    5.40    5.90
   8  -2  -9    4.70    8.90
   8  -2  -9   23.90   10.90
   8  -2  -9   21.80    8.60
   8   2  -8   21.40   10.70
   8   2  -8   39.00    7.40
   8   2  -8   39.40    7.50
  -8   2   8   32.20    5.70
   8   2  -8   48.30    7.30
   8   2  -8   45.30    6.60
   8  -2  -8   30.30   10.90
   8  -2  -8   34.10    9.90
   8  -2  -8   37.20    8.30
   8   2  -7  802.92   33.40
   8   2  -7  793.32   27.50
   8   2  -7  820.42   24.50
   8   2  -7  833.42   26.10
  -8   2   7  811.22   22.50
   8   2  -7  838.92   27.50
   8  -2  -7  818.92   30.60
   8  -2  -7  830.52   31.50
   8  -2  -7  812.82   27.00
   8  -2  -7  831.32   34.00
   8   2  -6  704.03   25.70
   8   2  -6  758.22   23.50
  -8   2   6  734.53   23.80
   8   2  -6  692.93   30.40
   8   2  -6  731.93   21.00
  -8   2   6  757.32   30.90
   8   2  -6  746.03   26.00
   8  -2  -6  762.82   28.60
   8  -2  -6  702.03   30.70
   8  -2  -6  723.63   29.00
   8  -2  -6  730.63   23.70
   8   2  -5  267.77   19.00
   8   2  -5  246.78   12.00
  -8   2   5  248.88   12.20
   8   2  -5  270.67   15.40
   8   2  -5  258.47   15.40
   8  -2  -5  256.47   18.80
  -8  -2   5  238.98   16.20
  -8  -2   5  224.98   14.40
   8  -2  -5  250.47   17.30
   8  -2  -5  258.17   16.60
   8  -2  -5  246.88   11.40
  -8   2   4  570.04   25.40
   8   2  -4  568.14   23.00
   8   2  -4  602.54   22.80
   8   2  -4  598.14   26.10
  -8   2   4  548.15   19.30
  -8   2   4  579.04   24.70
   8  -2  -4  528.65   25.60
  -8  -2   4  626.14   23.10
   8  -2  -4  560.64   25.20
  -8  -2   4  535.35   24.80
   8  -2  -4  574.14   24.40
   8  -2  -4  559.04   18.40
  -8   2   3  338.87   14.10
  -8   2   3  287.77   18.40
   8   2  -3  309.07   16.80
   8   2  -3  286.67   19.00
   8  -2  -3  298.07   19.40
  -8  -2   3  313.27   18.30
  -8  -2   3  309.47   17.70
   8  -2  -3  310.37   19.10
   8  -2  -3  332.07   18.40
   8   2  -2    8.70    7.30
   8   2  -2   -4.70    6.90
  -8   2   2    5.60    4.90
  -8   2   2   -1.50    7.00
  -8  -2   2    3.30    3.80
  -8  -2   2    0.20    7.10
   8  -2  -2    4.50    8.10
  -8  -2   2    5.60    7.00
   8  -2  -2    3.50    7.20
   8  -2  -2    3.10    8.40
  -8   2   1  336.17   18.50
  -8   2   1  361.56   15.50
  -8   2   1  358.46   20.60
   8   2  -1  330.17   18.90
   8   2  -1  366.46   18.70
  -8  -2   1  325.87   14.30
   8  -2  -1  365.66   19.80
  -8  -2   1  316.67   18.90
   8  -2  -1  342.97   20.40
   8  -2  -1  325.47   13.50
  -8  -2   1  328.17   17.80
   8  -2  -1  328.47   19.70
   8   2   0  284.47   17.30
   8   2   0  251.57   17.50
  -8   2   0  306.87   17.80
  -8   2   0  305.27   19.80
  -8   2   0  314.57   15.80
   8  -2   0  289.67   19.40
   8  -2   0  300.27   14.40
   8  -2   0  296.07   18.70
   8  -2   0  279.07   18.20
  -8  -2   0  293.67   18.70
  -8   2  -1  736.13   31.00
  -8   2  -1  749.62   28.20
   8   2   1  739.83   27.50
   8   2   1  780.42   31.00
  -8   2  -1  769.72   27.40
   8  -2   1  767.02   28.90
  -8  -2  -1  717.93   30.70
   8  -2   1  726.43   25.70
  -8  -2  -1  777.02   27.10
   8  -2   1  741.93   30.70
  -8   2  -2 1192.18   39.70
  -8   2  -2 1213.98   42.80
   8   2   2 1211.18   38.10
  -8   2  -2 1239.58   38.90
   8  -2   2 1182.28   42.40
   8  -2   2 1199.18   39.30
  -8  -2  -2 1271.97   39.80
  -8  -2  -2 1139.09   41.90
   8  -2   2 1243.78   38.70
   8   2   3  492.75   20.40
   8   2   3  492.45   23.90
  -8   2  -3  479.95   26.00
  -8   2  -3  464.05   21.30
  -8  -2  -3  524.85   24.20
   8  -2   3  505.25   22.30
   8  -2   3  477.85   25.50
   8  -2   3  487.95   23.10
  -8  -2  -3  490.25   26.60
   8   2   4   41.60    7.50
  -8   2  -4   25.00   10.90
   8   2   4   29.50   10.90
  -8   2  -4   36.70    7.80
   8  -2   4   48.00   12.30
  -8  -2  -4   57.69   13.70
   8  -2   4   32.40   10.80
  -8  -2  -4   49.10   12.10
   8  -2   4   61.39    9.20
   8   2   5   -1.40    5.20
   8   2   5   11.50   10.40
  -8   2  -5    6.70    9.90
  -8   2  -5   -7.60    5.50
   8  -2   5    3.80   10.40
  -8  -2  -5   13.50   11.60
   8  -2   5    9.70    9.90
   8   2   6  201.78   10.00
  -8   2  -6  235.38   21.10
   8   2   6  216.48   20.20
   8  -2   6  242.98   20.50
   8  -2   6  234.48   20.60
  -8  -2  -6  262.37   23.20
   8   2   7  150.78   18.70
  -8   2  -7  175.18   19.10
  -8  -2  -7  112.39   17.60
   8  -2   7  190.18   19.80
   8  -2   7  164.98   18.80
   8   2   8  271.27   24.60
  -8   2  -8  272.87   24.20
   8  -2   8  281.77   23.90
  -8  -2  -8  259.37   24.10
   8  -2   8  211.28   22.10
   8   2   9   96.69   18.30
  -8   2  -9   61.69   14.80
   8  -2   9   78.39   17.00
  -8  -2  -9   69.39   17.00
  -8   3  14    0.00    9.90
   8   3 -14    8.70   10.10
   8   3 -14    0.60   11.80
   8  -3 -14   -9.20   11.20
   8  -3 -14   -1.00   10.50
   8   3 -13    7.70    8.90
   8   3 -13   -3.00   10.80
  -8   3  13   14.80    9.50
   8  -3 -13   15.20   10.80
   8  -3 -13    2.10   11.30
   8   3 -12    4.20   10.90
  -8   3  12   11.80    8.60
   8   3 -12   11.60    8.60
   8  -3 -12    1.30   10.10
   8  -3 -12   -4.30   10.90
  -8   3  11   21.10    8.10
   8   3 -11    0.40   10.50
   8   3 -11    8.00    4.60
   8   3 -11   10.00    4.20
   8   3 -11   19.10    8.10
   8  -3 -11   13.50   11.60
   8  -3 -11    2.30    9.70
   8   3 -10   47.20   13.10
   8   3 -10   44.80    8.70
  -8   3  10   21.40    7.80
   8   3 -10   27.90    5.50
   8   3 -10   50.89    9.70
   8   3 -10   37.80    6.00
   8  -3 -10   28.10   10.40
   8  -3 -10   27.70   12.20
   8  -3 -10   27.70   10.90
   8   3  -9  355.26   18.00
   8   3  -9  358.06   15.50
   8   3  -9  392.96   25.50
   8   3  -9  376.46   15.50
  -8   3   9  362.66   16.80
   8   3  -9  402.06   19.70
   8  -3  -9  394.76   21.50
   8  -3  -9  363.26   25.00
   8  -3  -9  324.97   21.90
   8   3  -8   64.29   13.40
  -8   3   8   88.29    8.50
   8   3  -8  114.69   11.20
   8   3  -8  102.59    9.20
   8   3  -8  114.29    9.80
   8   3  -8   90.29    8.90
   8  -3  -8  102.99   11.60
   8  -3  -8  117.89   15.60
   8  -3  -8  112.29   14.30
   8   3  -7  417.16   18.40
   8   3  -7  410.66   17.60
   8   3  -7  381.76   24.30
  -8   3   7  375.86   19.10
  -8   3   7  400.66   14.80
   8   3  -7  405.56   17.40
   8   3  -7  411.96   16.60
   8  -3  -7  438.96   19.20
   8  -3  -7  387.76   24.50
   8  -3  -7  390.76   22.80
  -8   3   6   58.39    9.00
   8   3  -6   79.09    7.30
   8   3  -6   70.49    9.30
   8   3  -6   67.59    8.50
   8   3  -6   63.39   12.70
   8   3  -6   72.59    8.90
   8  -3  -6   60.19    8.30
   8  -3  -6   45.30   11.20
   8  -3  -6   49.00   11.40
   8  -3  -6   80.79   11.70
  -8  -3   6   83.29    8.90
   8   3  -5   73.99    9.80
   8   3  -5   83.79   10.00
   8   3  -5   88.09    7.40
  -8   3   5   83.59    6.00
   8   3  -5   98.49   13.30
  -8   3   5   93.99    9.70
   8  -3  -5   93.99    8.70
  -8  -3   5   65.99    9.10
   8  -3  -5   59.79   11.60
   8  -3  -5   79.79   11.40
   8  -3  -5   93.19   14.10
   8   3  -4  541.95   26.30
   8   3  -4  561.14   18.30
  -8   3   4  555.14   21.90
  -8   3   4  563.74   26.70
  -8   3   4  599.04   26.30
  -8   3   4  541.15   16.40
   8   3  -4  587.94   23.30
   8  -3  -4  561.74   20.50
   8  -3  -4  655.93   26.30
  -8  -3   4  578.94   22.90
   8  -3  -4  548.35   26.90
   8  -3  -4  552.14   26.00
  -8   3   3  775.12   22.40
  -8   3   3  763.62   27.10
  -8   3   3  803.02   31.70
   8   3  -3  828.02   29.40
   8   3  -3  798.22   31.60
  -8   3   3  805.42   32.00
   8   3  -3  806.32   23.80
  -8  -3   3  793.82   29.30
  -8  -3   3  797.82   23.70
   8  -3  -3  811.12   26.00
   8  -3  -3  816.32   32.50
   8  -3  -3  722.13   30.20
   8  -3  -3  773.22   30.80
   8   3  -2  331.07   17.90
  -8   3   2  307.77   19.90
  -8   3   2  273.87   19.30
  -8   3   2  287.27   12.40
  -8   3   2  269.87   15.50
   8   3  -2  289.27   18.90
   8  -3  -2  336.87   19.30
  -8  -3   2  302.27   13.40
   8  -3  -2  323.17   19.90
   8  -3  -2  277.67   19.70
  -8  -3   2  324.37   18.50
  -8   3   1  779.82   31.20
   8   3  -1  765.42   29.20
  -8   3   1  747.53   26.50
   8   3  -1  697.23   28.80
  -8   3   1  722.43   29.50
  -8   3   1  667.93   22.80
  -8  -3   1  763.62   29.40
   8  -3  -1  745.83   29.70
  -8  -3   1  731.73   24.70
   8  -3  -1  718.33   30.10
   8  -3  -1  723.73   29.90
  -8   3   0    6.10    8.00
  -8   3   0   28.40    7.80
   8   3   0   19.30    8.20
   8   3   0   31.60    9.10
  -8   3   0   18.00    6.30
  -8  -3   0   22.10    7.40
   8  -3   0   22.00    9.70
  -8  -3   0   37.40   10.40
   8  -3   0   16.00    8.60
  -8   3  -1   13.60    7.90
  -8   3  -1   16.20    6.80
   8   3   1   18.50    8.00
  -8   3  -1   13.40    8.20
   8   3   1   12.20    9.40
  -8   3  -1   25.20   10.10
   8  -3   1   19.50    9.50
  -8  -3  -1   -1.50    8.10
   8  -3   1   -0.20    8.70
   8  -3   1    9.70    7.00
  -8  -3  -1   11.60    7.70
  -8   3  -2   60.79   12.70
  -8   3  -2   27.90    8.30
  -8   3  -2   53.39   10.40
   8   3   2   28.20    8.10
  -8   3  -2   49.00    9.80
  -8  -3  -2   24.50   10.20
   8  -3   2   22.90    9.30
  -8  -3  -2   18.70    8.80
   8  -3   2   39.20    8.90
   8  -3   2   33.90   11.00
   8   3   3  169.88   14.00
  -8   3  -3  193.38   18.70
  -8   3  -3  215.88   17.40
  -8   3  -3  184.98   15.20
  -8   3  -3  217.08   17.40
  -8  -3  -3  217.48   17.60
   8  -3   3  194.98   15.30
  -8  -3  -3  168.48   18.00
   8  -3   3  178.48   15.50
   8  -3   3  198.88   18.70
  -8   3  -4    0.50   10.00
  -8   3  -4   -1.40    7.30
  -8   3  -4    1.90    9.20
   8   3   4   -1.60    6.20
   8  -3   4    3.10    9.60
  -8  -3  -4   10.70   11.60
   8  -3   4   23.90    9.90
   8   3   5 1497.55   43.70
  -8   3  -5 1565.64   53.19
  -8   3  -5 1566.14   46.50
   8   3   5 1516.25   51.89
  -8   3  -5 1507.85   52.39
   8  -3   5 1577.84   52.49
   8  -3   5 1451.35   50.09
  -8  -3  -5 1522.65   54.29
  -8   3  -6   17.90   10.90
   8   3   6  -10.10   10.40
   8  -3   6    0.80    9.80
   8  -3   6   -2.90    9.60
  -8  -3  -6  -14.80   11.00
  -8   3  -7   28.00   12.50
   8   3   7   25.60   13.50
  -8  -3  -7   49.40   15.10
   8  -3   7   43.60   12.90
   8  -3   7   35.10   12.50
   8   3   8   34.80   14.90
  -8   3  -8   36.90   13.10
  -8  -3  -8    1.00   13.90
   8  -3   8    2.10   11.50
   8   3   9   63.29   16.50
  -8   3  -9   50.89   14.40
   8  -3   9   22.60   14.10
  -8  -3  -9   66.19   16.60
   8   4 -14   -6.50    9.90
   8   4 -14    0.10   11.60
  -8   4  14    7.10   10.90
   8  -4 -14   -9.20   11.50
   8  -4 -14    6.00   11.70
  -8   4  13   16.50   10.20
   8   4 -13    8.60    9.80
   8   4 -13   20.40   12.30
   8  -4 -13    5.10   11.80
   8  -4 -13   32.90   12.50
   8   4 -12   27.40   10.10
  -8   4  12   23.10    9.70
   8   4 -12   20.50   12.60
   8  -4 -12   41.60   13.00
   8  -4 -12   32.00   13.30
   8   4 -11   64.99   11.30
  -8   4  11   54.19   10.20
   8   4 -11   45.00   13.70
   8  -4 -11   49.20   13.50
   8  -4 -11   42.80   13.10
  -8   4  10   18.60    8.00
   8   4 -10   24.20   12.10
   8   4 -10    9.20    7.70
   8  -4 -10    6.80   11.40
   8  -4 -10    8.40   10.40
   8   4  -9   -4.30    6.50
   8   4  -9    3.90    4.70
   8   4  -9    8.50    7.70
   8   4  -9    7.10    4.60
   8   4  -9   18.70   11.70
  -8   4   9    7.00    7.00
   8  -4  -9    6.00   10.60
   8  -4  -9   -7.90    8.30
   8  -4  -9    5.20   11.10
   8   4  -8   10.90    5.50
   8   4  -8   -4.70    5.40
  -8   4   8   -1.80    8.80
   8   4  -8   14.80    7.00
   8   4  -8   25.50   11.90
   8   4  -8    7.10    7.80
   8  -4  -8   -7.70    9.40
   8  -4  -8    1.80    8.20
   8  -4  -8   11.50   11.30
  -8   4   7  598.94   25.80
   8   4  -7  652.63   24.90
   8   4  -7  586.94   22.90
   8   4  -7  586.14   21.50
   8   4  -7  625.44   31.20
   8   4  -7  589.94   21.50
   8  -4  -7  587.24   28.90
   8  -4  -7  524.85   24.50
   8  -4  -7  568.84   30.70
   8   4  -6   56.29   13.70
   8   4  -6   58.89    8.50
   8   4  -6   54.29    8.60
   8   4  -6   53.69    8.20
   8   4  -6   55.89    9.30
  -8   4   6   50.99   10.10
   8  -4  -6   52.09    9.00
   8  -4  -6   53.19   11.80
  -8  -4   6   55.29    8.20
   8  -4  -6   43.10   12.00
   8   4  -5  417.66   25.20
   8   4  -5  391.56   17.80
  -8   4   5  390.76   21.30
   8   4  -5  399.26   18.50
   8  -4  -5  409.16   22.70
   8  -4  -5  433.06   25.60
  -8  -4   5  436.26   18.90
   8  -4  -5  414.26   19.20
   8  -4  -5  385.66   23.40
  -8   4   4    9.30    8.20
   8   4  -4    0.50    6.10
   8   4  -4   11.80    7.00
  -8   4   4    0.00    4.70
   8   4  -4   -4.50    9.70
   8  -4  -4    7.40    6.30
  -8  -4   4   -0.20    6.80
  -8  -4   4   11.30    4.90
   8  -4  -4    5.70    8.10
   8  -4  -4    9.90   10.30
   8  -4  -4    6.00    9.50
   8   4  -3   67.79   10.60
  -8   4   3   48.30    6.50
   8   4  -3   60.09    7.90
  -8   4   3   44.30    9.40
  -8   4   3   58.19   13.10
   8   4  -3   63.39   12.50
   8  -4  -3   42.00   11.70
   8  -4  -3  107.59   14.90
   8  -4  -3   49.50   11.20
   8  -4  -3   59.49    8.50
  -8  -4   3   59.39   10.00
   8   4  -2   -0.40    6.10
  -8   4   2    5.00    7.70
   8   4  -2    5.50    8.90
  -8   4   2    1.60    3.30
  -8   4   2    5.90    9.00
   8   4  -2    0.60    7.60
   8  -4  -2    7.80   10.10
  -8  -4   2   -1.80    3.70
   8  -4  -2    8.30    6.40
   8  -4  -2   -1.40    7.90
  -8  -4   2    3.20    7.80
   8   4  -1  528.45   25.30
   8   4  -1  461.15   23.40
  -8   4   1  472.85   24.20
  -8   4   1  480.95   22.90
  -8   4   1  488.25   19.30
   8   4  -1  500.25   20.70
  -8  -4   1  474.85   23.70
   8  -4  -1  501.65   26.10
   8  -4  -1  519.55   26.00
  -8  -4   1  498.45   20.70
   8   4   0    8.80    8.90
  -8   4   0   16.40    8.60
  -8   4   0   26.20   11.20
   8   4   0    8.40    8.90
  -8   4   0    7.40    9.20
  -8   4   0   13.60    6.90
   8  -4   0    8.50    9.20
   8  -4   0    3.90    9.50
  -8  -4   0    1.90    7.60
  -8  -4   0    9.00    9.40
  -8   4  -1  393.96   22.20
   8   4   1  381.66   23.00
   8   4   1  369.96   21.20
  -8   4  -1  410.36   23.30
  -8   4  -1  410.36   19.90
   8  -4   1  392.36   23.70
   8  -4   1  413.46   23.90
  -8  -4  -1  448.96   22.50
  -8  -4  -1  402.96   23.60
  -8   4  -2   -3.00    7.50
   8   4   2    1.70    7.40
  -8   4  -2   -4.80    8.50
  -8   4  -2    7.80    9.20
  -8  -4  -2    5.40    9.00
   8  -4   2   11.90    9.20
   8  -4   2   -5.10    8.90
   8  -4   2    7.80    8.40
  -8  -4  -2    3.60   10.40
   8   4   3  365.06   18.90
  -8   4  -3  322.87   22.60
  -8   4  -3  341.27   23.10
  -8   4  -3  313.17   20.60
   8  -4   3  325.77   22.50
  -8  -4  -3  374.36   24.70
   8  -4   3  315.87   20.50
  -8   4  -4  145.59   17.00
   8   4   4  143.39   12.40
  -8   4  -4  152.98   14.30
  -8   4  -4  208.38   19.00
   8  -4   4  187.38   18.60
   8  -4   4  168.58   16.90
  -8  -4  -4  157.88   18.70
  -8   4  -5   35.30   12.10
   8   4   5   26.80    7.20
  -8   4  -5   28.40    8.70
  -8   4  -5   39.00   12.30
   8  -4   5   20.80   10.50
   8  -4   5    4.40   10.00
  -8  -4  -5   17.80   12.50
  -8   4  -6   -4.20   11.00
   8   4   6    0.70   12.10
  -8   4  -6   10.60   10.70
   8  -4   6   18.60   11.20
  -8  -4  -6   26.00   13.60
   8  -4   6    6.80   10.20
  -8   4  -7  175.48   20.60
  -8   4  -7  197.08   20.70
   8   4   7  219.08   22.10
   8  -4   7  185.78   21.60
  -8  -4  -7  176.18   22.10
   8  -4   7  183.08   19.80
  -8   4  -8    8.90   12.30
  -8   4  -8   20.90   12.50
   8   4   8   -5.90   12.80
   8  -4   8   13.80   12.70
  -8  -4  -8   12.50   13.50
   8   5 -13   13.50   13.10
  -8   5  13    0.90    9.90
   8   5 -13    6.10   10.30
   8  -5 -13    2.40   11.80
   8  -5 -13   15.80   13.20
   8   5 -12   28.00   13.90
  -8   5  12   18.20   10.10
   8   5 -12    5.00    9.50
   8  -5 -12   18.20   12.50
   8  -5 -12    2.80   12.10
   8   5 -11   38.30   10.80
   8   5 -11   25.50   13.70
  -8   5  11   18.70    9.70
   8  -5 -11   30.50   13.30
   8  -5 -11   27.10   12.70
  -8   5  10   20.60    9.10
   8   5 -10   18.10    8.90
   8   5 -10   45.70   14.00
   8  -5 -10   22.80   12.00
   8  -5 -10   18.50   12.50
   8   5  -9  263.47   10.60
   8   5  -9  318.77   25.90
   8   5  -9  278.47   18.90
  -8   5   9  281.07   21.20
   8   5  -9  276.47   10.60
   8  -5  -9  278.87   23.20
   8  -5  -9  222.08   20.60
   8   5  -8    7.00    5.40
   8   5  -8   23.70   13.00
  -8   5   8   12.80   10.20
   8   5  -8   11.20    5.30
   8   5  -8   22.70    8.50
   8  -5  -8   15.40   11.30
   8  -5  -8   18.90   12.00
   8   5  -7    5.60   11.50
   8   5  -7   15.80    8.70
   8   5  -7   23.20    6.90
  -8   5   7   13.90    9.90
   8   5  -7    3.80    7.60
   8   5  -7   10.70    6.30
  -8  -5   7   25.60    6.00
   8  -5  -7   11.60   12.50
   8  -5  -7   32.70   12.50
   8  -5  -7   34.00    9.60
   8   5  -6  353.76   19.50
  -8   5   6  392.86   23.50
   8   5  -6  407.56   26.50
   8   5  -6  371.66   17.60
   8   5  -6  356.26   20.30
   8  -5  -6  366.96   20.70
   8  -5  -6  360.26   26.80
   8  -5  -6  362.16   24.60
  -8  -5   6  349.67   16.80
   8   5  -5   -0.50   11.10
   8   5  -5   16.20    8.30
   8   5  -5    7.80    7.10
  -8   5   5    1.80    9.60
  -8  -5   5   16.20    7.50
  -8  -5   5    8.20    6.00
   8  -5  -5   -1.40    7.20
   8  -5  -5    8.90   10.20
   8  -5  -5    2.80   11.90
   8   5  -4   19.00   11.20
  -8   5   4   10.30    6.30
  -8   5   4    9.10    9.80
   8   5  -4    6.30    7.40
   8   5  -4   12.80    7.80
  -8  -5   4   17.20    8.00
  -8  -5   4   21.40    6.70
   8  -5  -4    9.70   11.00
   8  -5  -4   15.20   10.50
   8  -5  -4   15.50    7.90
  -8   5   3  167.18   12.70
   8   5  -3  168.08   14.70
  -8   5   3  145.89   14.90
   8   5  -3  152.28   12.80
   8   5  -3  215.68   19.30
   8  -5  -3  187.58   15.00
  -8  -5   3  188.68   13.70
   8  -5  -3  160.18   17.30
  -8  -5   3  169.78   14.60
   8  -5  -3  184.28   19.40
  -8   5   2   82.49    9.50
   8   5  -2   58.89   11.00
  -8   5   2   71.79   11.70
   8   5  -2   63.79   10.20
   8   5  -2   56.19   12.10
   8  -5  -2   79.69   14.40
  -8  -5   2   67.09   11.50
   8  -5  -2   92.29   11.10
   8  -5  -2   78.29   12.50
  -8  -5   2   65.79    9.60
   8   5  -1  142.89   15.40
   8   5  -1  149.59   15.90
  -8   5   1  217.38   20.00
  -8   5   1  150.68   12.40
  -8   5   1  140.19   14.50
   8   5  -1  159.18   13.70
   8  -5  -1  124.59   16.00
  -8  -5   1  148.79   13.10
  -8  -5   1  154.28   15.70
   8  -5  -1  163.88   17.00
  -8   5   0   79.49   14.30
  -8   5   0   78.49   10.20
   8   5   0   55.19   10.90
  -8   5   0   79.49   12.70
   8   5   0   64.99   12.40
   8   5   0   51.89   11.20
  -8  -5   0   70.39   13.00
   8  -5   0   52.39   12.70
   8  -5   0   67.89   12.90
  -8  -5   0   67.19   10.80
  -8   5  -1   48.90    9.90
  -8   5  -1   19.90   10.60
   8   5   1   30.80   11.40
  -8   5  -1   36.20   11.50
   8   5   1   21.40    9.70
  -8  -5  -1   47.20   12.70
   8  -5   1   35.00   12.00
  -8  -5  -1   20.20    9.70
   8  -5   1   34.70   11.30
  -8   5  -2  -10.90    8.90
   8   5   2    4.60    8.30
   8  -5   2    0.70    9.90
  -8  -5  -2   12.20   11.40
   8   5   3  262.57   18.30
  -8   5  -3  232.88   20.40
  -8  -5  -3  272.77   23.50
   8  -5   3  296.57   22.70
  -8   5  -4   78.99   14.60
   8   5   4   75.39   11.00
  -8  -5  -4   83.39   16.00
   8  -5   4   88.09   15.00
  -8   5  -5  222.78   21.80
   8   5   5  234.28   16.30
   8  -5   5  232.48   20.60
  -8  -5  -5  258.07   24.20
   8  -5   5  244.38   21.30
  -8   5  -6   23.40   13.70
   8  -5   6   34.90   12.60
   8  -5   6   25.00   12.10
  -8  -5  -6   26.70   14.00
  -8   5  -7    3.50   13.00
  -8  -5  -7   -3.40   13.70
   8  -5   7   23.80   13.20
  -8   5  -8   -6.00   13.40
  -8   5  -8   -6.20   11.00
   8   5   8   -4.10   13.30
   8  -5   8   20.40   13.00
  -8  -5  -8   17.60   14.40
  -8   6  12   -1.20   10.00
   8   6 -12   23.20   14.10
   8   6 -12    0.30   10.60
   8  -6 -12   17.80   13.50
   8  -6 -12   -9.20   12.70
   8   6 -11   26.80   11.40
   8   6 -11   25.90   14.10
   8  -6 -11   51.29   15.10
   8  -6 -11   40.30   14.50
  -8   6  10    7.00   11.30
   8   6 -10  -15.10    8.70
   8   6 -10   14.90   13.50
   8  -6 -10   -1.80   12.30
   8  -6 -10    5.80   12.30
   8   6  -9   16.80   12.90
   8   6  -9    2.40    9.10
  -8   6   9    7.70   10.70
   8  -6  -9   -2.00   11.70
   8  -6  -9    2.90   11.60
   8   6  -8   51.99   11.00
   8   6  -8   42.30    6.60
   8   6  -8   42.00   14.00
  -8   6   8   58.19   12.80
   8   6  -8   48.90    6.60
   8  -6  -8   44.60   13.30
   8  -6  -8   44.00   13.70
   8   6  -7   25.10    9.90
   8   6  -7   30.60   12.70
   8   6  -7   13.20    6.20
  -8   6   7   16.00   11.20
  -8  -6   7   14.60    6.00
   8  -6  -7   16.00   11.80
   8  -6  -7   15.20   13.20
  -8   6   6   21.90   11.60
   8   6  -6   48.00   11.10
   8   6  -6   27.90    7.60
   8   6  -6   41.30   13.50
   8  -6  -6   35.30   13.80
  -8  -6   6   43.00    7.80
   8  -6  -6   39.40   13.50
   8   6  -5  517.95   24.70
   8   6  -5  483.45   21.80
  -8   6   5  463.05   27.50
   8   6  -5  498.95   29.80
  -8  -6   5  477.55   21.40
  -8  -6   5  513.25   22.40
   8  -6  -5  475.85   28.40
   8  -6  -5  444.86   29.60
  -8   6   4   -4.50    6.60
   8   6  -4   -4.00    8.50
   8   6  -4    5.80    7.60
   8   6  -4    2.50   11.10
  -8   6   4    8.30   10.90
  -8  -6   4   -0.80    7.40
  -8  -6   4    8.60    6.90
   8  -6  -4   11.90   10.80
   8  -6  -4   -2.40   11.90
   8   6  -3   13.50    8.70
  -8   6   3   10.70   11.10
  -8   6   3   25.20    7.70
   8   6  -3   13.40   11.30
   8   6  -3   29.80   10.10
   8  -6  -3    5.10   11.30
  -8  -6   3    7.80    7.60
   8  -6  -3   31.10   13.40
  -8  -6   3   31.60    9.60
   8   6  -2   47.30   12.50
  -8   6   2   70.19   10.30
   8   6  -2   57.09   11.50
   8   6  -2   45.50   11.00
  -8   6   2   51.59   12.70
  -8  -6   2   83.49   12.50
   8  -6  -2   51.69   11.90
  -8  -6   2   55.79    9.90
   8  -6  -2   73.49   15.60
  -8   6   1   85.89   13.90
   8   6  -1   97.99   14.60
  -8   6   1  108.59   12.30
   8   6  -1  109.89   13.50
   8   6  -1  123.89   14.70
   8  -6  -1   85.29   16.00
  -8  -6   1   93.89   13.70
  -8  -6   1   96.79   12.20
   8  -6  -1   88.49   14.00
   8   6   0   98.09   13.40
  -8   6   0   97.49   14.70
  -8   6   0  136.99   13.80
   8   6   0  126.19   15.20
   8   6   0  100.09   14.30
  -8  -6   0  113.29   15.10
  -8  -6   0  104.49   13.30
   8  -6   0  129.59   16.40
   8   6   1   53.39   11.70
   8   6   1   44.20   11.70
  -8   6  -1   66.99   13.30
   8  -6   1   46.20   13.00
  -8  -6  -1   64.19   13.30
  -8   6  -2  180.08   18.90
   8   6   2  168.08   16.10
   8  -6   2  145.89   17.40
  -8  -6  -2  171.08   18.90
  -8   6  -3   86.79   15.50
   8   6   3  126.39   14.30
  -8  -6  -3  124.19   18.00
   8  -6   3  114.19   16.00
  -8   6  -4   72.49   15.70
   8   6   4   48.20   10.70
  -8  -6  -4   91.89   16.70
   8  -6   4   42.90   12.70
   8   6   5    4.00    8.30
  -8   6  -5    3.40   12.00
   8  -6   5    3.80   11.00
  -8  -6  -5    5.20   13.00
  -8   6  -6    7.80   12.80
  -8  -6  -6   -9.30   12.80
  -8   6  -7   73.29   17.00
  -8  -6  -7   46.20   16.50
  -8   7  11   16.30   12.70
   8   7 -11   -9.80   12.90
   8   7 -11   -8.20   10.40
   8  -7 -11   -3.70   12.80
   8  -7 -11   -3.70   12.90
   8   7 -10   31.40   12.00
  -8   7  10   15.90   12.80
   8   7 -10   13.60   14.20
   8  -7 -10   27.70   14.40
   8  -7 -10   37.60   14.70
   8   7  -9  -13.60   13.20
   8   7  -9    0.80   10.30
  -8   7   9   10.90   12.30
   8  -7  -9   24.50   14.20
   8  -7  -9    9.00   13.20
  -8   7   8   40.90   13.70
   8   7  -8   51.09    7.10
   8   7  -8   39.50   14.40
   8   7  -8   28.30   11.30
   8  -7  -8   21.80   13.60
   8  -7  -8   28.80   13.80
   8   7  -7    8.20   10.80
  -8   7   7   17.50   12.50
   8   7  -7   -2.50   12.50
   8  -7  -7    3.60   13.00
   8  -7  -7   15.10   13.30
   8   7  -6   -5.70   11.70
   8   7  -6   -4.00    9.80
  -8   7   6   -2.30   11.20
   8  -7  -6    3.60   12.00
   8  -7  -6   -1.30   11.80
   8   7  -5    4.60   10.10
  -8   7   5   -5.50   11.70
   8   7  -5    6.40   11.80
   8  -7  -5    0.50   11.40
  -8  -7   5   23.20    8.00
   8  -7  -5   -0.80   12.70
   8   7  -4  139.09   15.30
  -8   7   4  128.99   17.50
   8   7  -4  102.79   13.50
   8   7  -4  116.29   17.80
   8  -7  -4   84.39   15.20
  -8  -7   4  119.19   13.40
  -8  -7   4  112.09   12.60
   8  -7  -4  100.29   16.60
  -8   7   3   -7.50   11.70
  -8   7   3   31.50    9.20
   8   7  -3   26.50   11.60
   8   7  -3   34.00    9.90
   8   7  -3   30.50   11.90
  -8  -7   3   43.00   10.10
   8  -7  -3   49.99   13.00
[truncated: 139,366 more chars]
