# Supplementary material for: Synthesis, Crystal Structure, and Luminescence of Cadmium(II) and Silver(I) Coordination Polymers Based on 1,3-Bis(1,2,4-triazol-1-yl)adamantane
Source: Molecules. 2021 Sep 5;26(17):5400. doi: 10.3390/molecules26175400 (PMC8434004; doi:10.3390/molecules26175400)
Supplement: Supplementary file 1 [file molecules-26-05400-s001.zip › Compound2.cif]

data_pot_cd520
_audit_creation_date               2021-03-29
_audit_creation_method
;
Olex2 1.2
(compiled 2018.05.29 svn.r3508 for OlexSys, GUI svn.r5506)
;
_shelx_SHELXL_version_number       '2017/1'
_audit_contact_author_address      ?
_audit_contact_author_email        ?
_audit_contact_author_name         ''
_audit_contact_author_phone        ?
_publ_contact_author_id_orcid      ?
_publ_section_references
;
Dolomanov, O.V., Bourhis, L.J., Gildea, R.J, Howard, J.A.K. & Puschmann, H.
 (2009), J. Appl. Cryst. 42, 339-341.

Sheldrick, G.M. (2015). Acta Cryst. A71, 3-8.

Sheldrick, G.M. (2015). Acta Cryst. C71, 3-8.
;
_chemical_name_common              ?
_chemical_name_systematic          ?
_chemical_formula_moiety           'C28 H36 Cd N14 O6'
_chemical_formula_sum              'C28 H36 Cd N14 O6'
_chemical_formula_weight           777.11
_chemical_melting_point            ?
loop_
  _atom_type_symbol
  _atom_type_description
  _atom_type_scat_dispersion_real
  _atom_type_scat_dispersion_imag
  _atom_type_scat_source
 'C' 'C' 0.0033 0.0016 'International Tables Vol C Tables 4.2.6.8 and 6.1.1.4'
 'H' 'H' 0.0000 0.0000 'International Tables Vol C Tables 4.2.6.8 and 6.1.1.4'
 'Cd' 'Cd' -0.8075 1.2024
 'International Tables Vol C Tables 4.2.6.8 and 6.1.1.4'
 'N' 'N' 0.0061 0.0033 'International Tables Vol C Tables 4.2.6.8 and 6.1.1.4'
 'O' 'O' 0.0106 0.0060 'International Tables Vol C Tables 4.2.6.8 and 6.1.1.4'

_shelx_space_group_comment
;
The symmetry employed for this shelxl refinement is uniquely defined
by the following loop, which should always be used as a source of
symmetry information in preference to the above space-group names.
They are only intended as comments.
;
_space_group_crystal_system        'monoclinic'
_space_group_IT_number             14
_space_group_name_H-M_alt          'P 1 21/n 1'
_space_group_name_Hall             '-P 2yn'
loop_
  _space_group_symop_operation_xyz
 'x, y, z'
 '-x+1/2, y+1/2, -z+1/2'
 '-x, -y, -z'
 'x-1/2, -y-1/2, z-1/2'

_cell_length_a                     11.3904(13)
_cell_length_b                     13.4621(12)
_cell_length_c                     20.904(2)
_cell_angle_alpha                  90
_cell_angle_beta                   93.070(4)
_cell_angle_gamma                  90
_cell_volume                       3200.7(6)
_cell_formula_units_Z              4
_cell_measurement_reflns_used      6457
_cell_measurement_temperature      150(2)
_cell_measurement_theta_max        25.66
_cell_measurement_theta_min        2.47
_shelx_estimated_absorpt_T_max     0.964
_shelx_estimated_absorpt_T_min     0.754
_exptl_absorpt_coefficient_mu      0.749
_exptl_absorpt_correction_T_max    0.7453
_exptl_absorpt_correction_T_min    0.6304
_exptl_absorpt_correction_type     multi-scan
_exptl_absorpt_process_details    
 'SADABS-2012/1 (Bruker,2012) was used for absorption correction. wR2(int) was 0.0538 before and 0.0456 after correction. The Ratio of minimum to maximum transmission is 0.8458. The \l/2 correction factor is 0.0015.'
_exptl_absorpt_special_details     ?
_exptl_crystal_colour              colourless
_exptl_crystal_colour_primary      colourless
_exptl_crystal_density_diffrn      1.613
_exptl_crystal_density_meas        ?
_exptl_crystal_density_method      ?
_exptl_crystal_description         needle
_exptl_crystal_F_000               1592
_exptl_crystal_size_max            0.4
_exptl_crystal_size_mid            0.08
_exptl_crystal_size_min            0.05
_exptl_transmission_factor_max     ?
_exptl_transmission_factor_min     ?
_diffrn_reflns_av_R_equivalents    0.0366
_diffrn_reflns_av_unetI/netI       0.0463
_diffrn_reflns_Laue_measured_fraction_full  0.999
_diffrn_reflns_Laue_measured_fraction_max  0.999
_diffrn_reflns_limit_h_max         13
_diffrn_reflns_limit_h_min         -9
_diffrn_reflns_limit_k_max         16
_diffrn_reflns_limit_k_min         -15
_diffrn_reflns_limit_l_max         24
_diffrn_reflns_limit_l_min         -25
_diffrn_reflns_number              18657
_diffrn_reflns_point_group_measured_fraction_full  0.999
_diffrn_reflns_point_group_measured_fraction_max  0.999
_diffrn_reflns_theta_full          25.242
_diffrn_reflns_theta_max           25.695
_diffrn_reflns_theta_min           1.800
_diffrn_ambient_temperature        150(2)
_diffrn_detector                   CCD
_diffrn_detector_area_resol_mean   8.33
_diffrn_detector_type              'Bruker APEXII CCD area detector'
_diffrn_measured_fraction_theta_full  0.999
_diffrn_measured_fraction_theta_max  0.999
_diffrn_measurement_device         '\k-geometry diffractometer'
_diffrn_measurement_device_type    'Bruker APEX diffractometer'
_diffrn_measurement_method         '\w and \f scans'
_diffrn_radiation_monochromator    'graphite'
_diffrn_radiation_type             MoK\a
_diffrn_radiation_wavelength       0.71073
_diffrn_source                     'sealed tube'
_diffrn_special_details            ?
_diffrn_standards_interval_count   .
_diffrn_standards_interval_time    .
_diffrn_standards_number           .
_reflns_Friedel_coverage           0.000
_reflns_Friedel_fraction_full      .
_reflns_Friedel_fraction_max       .
_reflns_number_gt                  4920
_reflns_number_total               6089
_reflns_special_details
;
 Reflections were merged by SHELXL according to the crystal
 class for the calculation of statistics and refinement.
 
 _reflns_Friedel_fraction is defined as the number of unique
 Friedel pairs measured divided by the number that would be
 possible theoretically, ignoring centric projections and
 systematic absences.
;
_reflns_threshold_expression       'I > 2\s(I)'
_computing_cell_refinement         'Bruker SAINT'
_computing_data_collection         'Bruker APEX2'
_computing_data_reduction          'Bruker SAINT'
_computing_molecular_graphics      'Olex2 (Dolomanov et al., 2009)'
_computing_publication_material    'Olex2 (Dolomanov et al., 2009)'
_computing_structure_refinement    'ShelXL (Sheldrick, 2015)'
_computing_structure_solution      'ShelXT (Sheldrick, 2015)'
_refine_diff_density_max           0.749
_refine_diff_density_min           -0.460
_refine_diff_density_rms           0.077
_refine_ls_extinction_coef         .
_refine_ls_extinction_method       none
_refine_ls_goodness_of_fit_ref     1.007
_refine_ls_hydrogen_treatment      constr
_refine_ls_matrix_type             full
_refine_ls_number_parameters       442
_refine_ls_number_reflns           6089
_refine_ls_number_restraints       0
_refine_ls_R_factor_all            0.0465
_refine_ls_R_factor_gt             0.0315
_refine_ls_restrained_S_all        1.007
_refine_ls_shift/su_max            0.001
_refine_ls_shift/su_mean           0.000
_refine_ls_structure_factor_coef   Fsqd
_refine_ls_weighting_details      
 'w=1/[\s^2^(Fo^2^)+(0.0316P)^2^+1.4239P] where P=(Fo^2^+2Fc^2^)/3'
_refine_ls_weighting_scheme        calc
_refine_ls_wR_factor_gt            0.0666
_refine_ls_wR_factor_ref           0.0720
_refine_special_details            ?
_olex2_refinement_description
;
1. Fixed Uiso
 At 1.2 times of:
  All C(H) groups, All C(H,H) groups
2.a Ternary CH refined with riding coordinates:
 C7(H7), C10(H10), C21(H21), C23(H23)
2.b Secondary CH2 refined with riding coordinates:
 C4(H4A,H4B), C5(H5A,H5B), C6(H6A,H6B), C8(H8A,H8B), C9(H9A,H9B), C11(H11A,
 H11B), C18(H18A,H18B), C19(H19A,H19B), C20(H20A,H20B), C22(H22A,H22B),
 C24(H24A,H24B), C25(H25A,H25B)
2.c Aromatic/amide H refined with riding coordinates:
 C1(H1), C2(H2), C13(H13), C14(H14), C15(H15), C16(H16), C27(H27), C28(H28)
;
_atom_sites_solution_hydrogens     geom
_atom_sites_solution_primary       dual
_atom_sites_solution_secondary     ?
loop_
  _atom_site_label
  _atom_site_type_symbol
  _atom_site_fract_x
  _atom_site_fract_y
  _atom_site_fract_z
  _atom_site_U_iso_or_equiv
  _atom_site_adp_type
  _atom_site_occupancy
  _atom_site_site_symmetry_order
  _atom_site_calc_flag
  _atom_site_refinement_flags_posn
  _atom_site_refinement_flags_adp
  _atom_site_refinement_flags_occupancy
  _atom_site_disorder_assembly
  _atom_site_disorder_group
 Cd1 Cd 0.73657(2) 0.35120(2) 0.41629(2) 0.01573(7) Uani 1 1 d . . . . .
 O11 O 0.8240(2) 0.51503(18) 0.46779(10) 0.0418(6) Uani 1 1 d . . . . .
 O12 O 0.6809(2) 0.44574(16) 0.51441(10) 0.0384(6) Uani 1 1 d . . . . .
 O13 O 0.7408(3) 0.59101(17) 0.54398(11) 0.0825(12) Uani 1 1 d . . . . .
 O21 O 0.73763(17) 0.21305(15) 0.34470(9) 0.0264(5) Uani 1 1 d . . . . .
 O22 O 0.5960(2) 0.27984(15) 0.28497(10) 0.0345(5) Uani 1 1 d . . . . .
 O23 O 0.64887(18) 0.12782(14) 0.26842(9) 0.0264(5) Uani 1 1 d . . . . .
 N3 N 0.7490(3) 0.51802(19) 0.50919(11) 0.0340(7) Uani 1 1 d . . . . .
 N4 N 0.6599(2) 0.20741(18) 0.29821(11) 0.0218(5) Uani 1 1 d . . . . .
 N11 N 0.62445(19) 0.46632(16) 0.36185(10) 0.0174(5) Uani 1 1 d . . . . .
 N12 N 0.56883(19) 0.56665(17) 0.27952(10) 0.0205(5) Uani 1 1 d . . . . .
 N13 N 0.47254(19) 0.52783(15) 0.30722(10) 0.0161(5) Uani 1 1 d . . . . .
 N14 N -0.0927(2) 0.38124(16) 0.35874(10) 0.0190(5) Uani 1 1 d . . . . .
 N15 N 0.0495(2) 0.35398(16) 0.29011(11) 0.0208(5) Uani 1 1 d . . . . .
 N16 N 0.05297(18) 0.45048(15) 0.31096(10) 0.0149(5) Uani 1 1 d . . . . .
 N21 N 0.8534(2) 0.25742(17) 0.48750(11) 0.0224(5) Uani 1 1 d . . . . .
 N22 N 0.9087(2) 0.1453(2) 0.56276(14) 0.0420(7) Uani 1 1 d . . . . .
 N23 N 1.0050(2) 0.19076(17) 0.54025(10) 0.0199(5) Uani 1 1 d . . . . .
 N24 N 1.5689(2) 0.25984(16) 0.44980(10) 0.0197(5) Uani 1 1 d . . . . .
 N25 N 1.4432(2) 0.13070(17) 0.45525(11) 0.0229(6) Uani 1 1 d . . . . .
 N26 N 1.42788(19) 0.19605(16) 0.50419(10) 0.0161(5) Uani 1 1 d . . . . .
 C1 C 0.6568(2) 0.52677(19) 0.31392(12) 0.0176(6) Uani 1 1 d . . . . .
 H1 H 0.736731 0.539338 0.305833 0.021 Uiso 1 1 calc R . . . .
 C2 C 0.5075(2) 0.46917(19) 0.35581(12) 0.0186(6) Uani 1 1 d . . . . .
 H2 H 0.456399 0.434316 0.382391 0.022 Uiso 1 1 calc R . . . .
 C3 C 0.3535(2) 0.55876(19) 0.28382(12) 0.0151(6) Uani 1 1 d . . . . .
 C4 C 0.3307(2) 0.66453(19) 0.30798(13) 0.0196(6) Uani 1 1 d . . . . .
 H4A H 0.337241 0.665890 0.355391 0.024 Uiso 1 1 calc R . . . .
 H4B H 0.389766 0.710836 0.291793 0.024 Uiso 1 1 calc R . . . .
 C5 C 0.2636(2) 0.48671(19) 0.31006(12) 0.0150(6) Uani 1 1 d . . . . .
 H5A H 0.270108 0.486725 0.357479 0.018 Uiso 1 1 calc R . . . .
 H5B H 0.278665 0.418433 0.294918 0.018 Uiso 1 1 calc R . . . .
 C6 C 0.3447(2) 0.5563(2) 0.21056(12) 0.0184(6) Uani 1 1 d . . . . .
 H6A H 0.360371 0.488261 0.195274 0.022 Uiso 1 1 calc R . . . .
 H6B H 0.403936 0.601526 0.193424 0.022 Uiso 1 1 calc R . . . .
 C7 C 0.2203(2) 0.5891(2) 0.18664(13) 0.0216(6) Uani 1 1 d . . . . .
 H7 H 0.214017 0.588000 0.138745 0.026 Uiso 1 1 calc R . . . .
 C8 C 0.1969(3) 0.6944(2) 0.21045(14) 0.0245(7) Uani 1 1 d . . . . .
 H8A H 0.117118 0.715868 0.195200 0.029 Uiso 1 1 calc R . . . .
 H8B H 0.254506 0.741035 0.193123 0.029 Uiso 1 1 calc R . . . .
 C9 C 0.1295(2) 0.51832(19) 0.21283(12) 0.0180(6) Uani 1 1 d . . . . .
 H9A H 0.143302 0.450022 0.197366 0.022 Uiso 1 1 calc R . . . .
 H9B H 0.049367 0.538845 0.197515 0.022 Uiso 1 1 calc R . . . .
 C10 C 0.2074(2) 0.6964(2) 0.28407(13) 0.0206(6) Uani 1 1 d . . . . .
 H10 H 0.192100 0.765415 0.299317 0.025 Uiso 1 1 calc R . . . .
 C11 C 0.1160(2) 0.62527(19) 0.31073(13) 0.0204(6) Uani 1 1 d . . . . .
 H11A H 0.122136 0.626148 0.358148 0.024 Uiso 1 1 calc R . . . .
 H11B H 0.035685 0.646450 0.296326 0.024 Uiso 1 1 calc R . . . .
 C12 C 0.1400(2) 0.52054(18) 0.28621(12) 0.0153(6) Uani 1 1 d . . . . .
 C13 C -0.0322(2) 0.4643(2) 0.35180(12) 0.0188(6) Uani 1 1 d . . . . .
 H13 H -0.047222 0.525170 0.372870 0.023 Uiso 1 1 calc R . . . .
 C14 C -0.0389(2) 0.3164(2) 0.31993(13) 0.0197(6) Uani 1 1 d . . . . .
 H14 H -0.063312 0.249262 0.314778 0.024 Uiso 1 1 calc R . . . .
 C15 C 0.9701(3) 0.2571(2) 0.49658(13) 0.0247(7) Uani 1 1 d . . . . .
 H15 H 1.021467 0.299128 0.474583 0.030 Uiso 1 1 calc R . . . .
 C16 C 0.8216(3) 0.1874(3) 0.52911(15) 0.0365(8) Uani 1 1 d . . . . .
 H16 H 0.741775 0.169570 0.533818 0.044 Uiso 1 1 calc R . . . .
 C17 C 1.1245(2) 0.17008(19) 0.56944(12) 0.0166(6) Uani 1 1 d . . . . .
 C18 C 1.1335(2) 0.0605(2) 0.58905(13) 0.0200(6) Uani 1 1 d . . . . .
 H18A H 1.119642 0.017538 0.550951 0.024 Uiso 1 1 calc R . . . .
 H18B H 1.073385 0.044787 0.619998 0.024 Uiso 1 1 calc R . . . .
 C19 C 1.1456(2) 0.2368(2) 0.62833(13) 0.0207(6) Uani 1 1 d . . . . .
 H19A H 1.085674 0.223054 0.659754 0.025 Uiso 1 1 calc R . . . .
 H19B H 1.138953 0.307458 0.615517 0.025 Uiso 1 1 calc R . . . .
 C20 C 1.2156(2) 0.1933(2) 0.51995(12) 0.0157(6) Uani 1 1 d . . . . .
 H20A H 1.202378 0.150237 0.481855 0.019 Uiso 1 1 calc R . . . .
 H20B H 1.208396 0.263441 0.506051 0.019 Uiso 1 1 calc R . . . .
 C21 C 1.2687(2) 0.2165(2) 0.65878(12) 0.0204(6) Uani 1 1 d . . . . .
 H21 H 1.282452 0.259641 0.697380 0.024 Uiso 1 1 calc R . . . .
 C22 C 1.2782(3) 0.1080(2) 0.67870(12) 0.0232(7) Uani 1 1 d . . . . .
 H22A H 1.219268 0.093084 0.710492 0.028 Uiso 1 1 calc R . . . .
 H22B H 1.357305 0.094861 0.698865 0.028 Uiso 1 1 calc R . . . .
 C23 C 1.2571(2) 0.0412(2) 0.61977(13) 0.0202(6) Uani 1 1 d . . . . .
 H23 H 1.263852 -0.029989 0.633030 0.024 Uiso 1 1 calc R . . . .
 C24 C 1.3502(2) 0.06462(19) 0.57133(13) 0.0186(6) Uani 1 1 d . . . . .
 H24A H 1.338413 0.021353 0.533225 0.022 Uiso 1 1 calc R . . . .
 H24B H 1.429826 0.052001 0.590962 0.022 Uiso 1 1 calc R . . . .
 C25 C 1.3605(2) 0.2408(2) 0.60971(12) 0.0198(6) Uani 1 1 d . . . . .
 H25A H 1.354030 0.311507 0.596901 0.024 Uiso 1 1 calc R . . . .
 H25B H 1.440718 0.229291 0.628915 0.024 Uiso 1 1 calc R . . . .
 C26 C 1.3385(2) 0.17440(19) 0.55137(12) 0.0145(6) Uani 1 1 d . . . . .
 C27 C 1.5034(2) 0.2716(2) 0.49979(13) 0.0185(6) Uani 1 1 d . . . . .
 H27 H 1.509235 0.326268 0.528553 0.022 Uiso 1 1 calc R . . . .
 C28 C 1.5277(3) 0.1724(2) 0.42455(13) 0.0229(7) Uani 1 1 d . . . . .
 H28 H 1.558103 0.143651 0.387362 0.027 Uiso 1 1 calc R . . . .

loop_
  _atom_site_aniso_label
  _atom_site_aniso_U_11
  _atom_site_aniso_U_22
  _atom_site_aniso_U_33
  _atom_site_aniso_U_23
  _atom_site_aniso_U_13
  _atom_site_aniso_U_12
 Cd1 0.00830(11) 0.01970(11) 0.01921(11) 0.00344(9) 0.00077(7) 0.00120(9)
 O11 0.0330(15) 0.0598(16) 0.0329(12) -0.0021(12) 0.0057(11) -0.0085(12)
 O12 0.0495(16) 0.0314(13) 0.0349(12) 0.0035(11) 0.0086(11) -0.0081(12)
 O13 0.200(4) 0.0194(13) 0.0321(13) -0.0049(12) 0.0424(18) -0.0152(17)
 O21 0.0169(11) 0.0356(12) 0.0266(11) -0.0070(9) 0.0009(9) -0.0063(9)
 O22 0.0412(15) 0.0302(12) 0.0324(12) 0.0003(10) 0.0047(10) 0.0109(11)
 O23 0.0277(13) 0.0234(11) 0.0280(10) -0.0084(9) 0.0012(9) -0.0024(9)
 N3 0.062(2) 0.0235(15) 0.0171(12) 0.0021(12) 0.0046(13) -0.0002(14)
 N4 0.0188(14) 0.0250(14) 0.0225(12) 0.0020(11) 0.0095(11) -0.0024(11)
 N11 0.0113(13) 0.0186(12) 0.0220(12) 0.0008(10) -0.0003(10) 0.0002(10)
 N12 0.0103(13) 0.0240(13) 0.0276(12) 0.0064(11) 0.0032(10) -0.0030(10)
 N13 0.0083(12) 0.0195(12) 0.0205(11) 0.0028(10) 0.0021(9) -0.0014(10)
 N14 0.0114(13) 0.0195(12) 0.0262(12) 0.0011(10) 0.0009(10) -0.0014(10)
 N15 0.0163(13) 0.0137(11) 0.0328(13) -0.0009(11) 0.0050(10) -0.0003(10)
 N16 0.0081(12) 0.0144(11) 0.0220(11) 0.0011(10) 0.0005(9) 0.0002(9)
 N21 0.0120(13) 0.0301(14) 0.0248(12) 0.0072(11) -0.0011(10) 0.0030(11)
 N22 0.0131(14) 0.0559(18) 0.0568(18) 0.0341(16) -0.0003(13) -0.0036(13)
 N23 0.0109(13) 0.0248(12) 0.0241(12) 0.0092(11) 0.0024(10) 0.0004(10)
 N24 0.0120(13) 0.0251(13) 0.0218(12) 0.0022(10) -0.0003(10) 0.0000(10)
 N25 0.0239(14) 0.0255(13) 0.0201(12) -0.0061(10) 0.0066(10) -0.0057(11)
 N26 0.0118(12) 0.0177(12) 0.0188(11) 0.0009(10) 0.0016(9) 0.0011(10)
 C1 0.0094(15) 0.0206(14) 0.0228(14) 0.0008(12) 0.0007(11) -0.0010(12)
 C2 0.0126(15) 0.0211(14) 0.0223(14) 0.0066(12) 0.0014(12) 0.0009(12)
 C3 0.0065(14) 0.0170(14) 0.0215(13) 0.0025(12) -0.0008(11) -0.0003(11)
 C4 0.0137(15) 0.0171(14) 0.0278(15) 0.0009(12) -0.0016(12) -0.0036(12)
 C5 0.0108(15) 0.0167(14) 0.0175(13) 0.0030(11) 0.0003(11) 0.0011(11)
 C6 0.0125(15) 0.0213(15) 0.0212(14) 0.0047(12) -0.0014(11) -0.0051(12)
 C7 0.0151(16) 0.0272(16) 0.0218(14) 0.0076(13) -0.0053(12) -0.0024(12)
 C8 0.0151(16) 0.0228(15) 0.0352(16) 0.0110(14) -0.0033(13) -0.0030(13)
 C9 0.0122(15) 0.0185(14) 0.0227(14) 0.0001(12) -0.0034(11) -0.0022(11)
 C10 0.0174(16) 0.0107(13) 0.0332(16) 0.0022(13) -0.0029(12) -0.0014(12)
 C11 0.0117(15) 0.0204(15) 0.0291(15) -0.0025(12) 0.0023(12) 0.0010(11)
 C12 0.0079(14) 0.0145(13) 0.0235(14) 0.0006(12) 0.0013(11) -0.0035(11)
 C13 0.0116(15) 0.0216(15) 0.0232(14) -0.0006(12) 0.0022(12) 0.0006(12)
 C14 0.0136(15) 0.0152(13) 0.0304(15) 0.0025(13) 0.0029(12) -0.0008(12)
 C15 0.0149(16) 0.0318(17) 0.0275(15) 0.0117(14) 0.0022(12) 0.0028(13)
 C16 0.0113(17) 0.051(2) 0.047(2) 0.0227(18) 0.0006(14) -0.0007(15)
 C17 0.0069(14) 0.0203(15) 0.0226(14) 0.0037(12) 0.0014(11) 0.0023(11)
 C18 0.0151(16) 0.0212(15) 0.0238(14) 0.0044(13) 0.0025(12) -0.0027(12)
 C19 0.0195(16) 0.0208(15) 0.0223(14) 0.0004(12) 0.0060(12) 0.0049(12)
 C20 0.0127(15) 0.0171(14) 0.0171(13) 0.0040(12) -0.0006(11) 0.0010(11)
 C21 0.0184(16) 0.0262(16) 0.0167(13) -0.0023(12) 0.0029(12) 0.0010(12)
 C22 0.0173(16) 0.0341(17) 0.0181(13) 0.0064(13) 0.0007(12) 0.0033(13)
 C23 0.0162(16) 0.0195(14) 0.0252(15) 0.0063(12) 0.0038(12) 0.0024(12)
 C24 0.0159(15) 0.0181(14) 0.0216(14) 0.0031(12) -0.0010(11) 0.0038(12)
 C25 0.0145(16) 0.0231(15) 0.0219(14) -0.0024(12) 0.0006(12) -0.0012(12)
 C26 0.0111(14) 0.0174(14) 0.0154(12) 0.0009(11) 0.0029(11) 0.0002(11)
 C27 0.0129(15) 0.0209(14) 0.0217(14) -0.0005(12) 0.0005(11) 0.0008(12)
 C28 0.0232(17) 0.0271(16) 0.0188(14) -0.0029(13) 0.0047(12) -0.0046(13)

_geom_special_details
;
 All esds (except the esd in the dihedral angle between two l.s. planes)
 are estimated using the full covariance matrix.  The cell esds are taken
 into account individually in the estimation of esds in distances, angles
 and torsion angles; correlations between esds in cell parameters are only
 used when they are defined by crystal symmetry.  An approximate (isotropic)
 treatment of cell esds is used for estimating esds involving l.s. planes.
;
loop_
  _geom_bond_atom_site_label_1
  _geom_bond_atom_site_label_2
  _geom_bond_distance
  _geom_bond_site_symmetry_2
  _geom_bond_publ_flag
 Cd1 O11 2.627(2) . ?
 Cd1 O12 2.524(2) . ?
 Cd1 O21 2.3874(19) . ?
 Cd1 N11 2.274(2) . ?
 Cd1 N14 2.375(2) 1_655 ?
 Cd1 N21 2.317(2) . ?
 Cd1 N24 2.407(2) 1_455 ?
 O11 N3 1.249(3) . ?
 O12 N3 1.253(3) . ?
 O13 N3 1.229(3) . ?
 O21 N4 1.282(3) . ?
 O22 N4 1.239(3) . ?
 O23 N4 1.242(3) . ?
 N11 C1 1.357(3) . ?
 N11 C2 1.332(3) . ?
 N12 N13 1.371(3) . ?
 N12 C1 1.316(3) . ?
 N13 C2 1.331(3) . ?
 N13 C3 1.476(3) . ?
 N14 C13 1.326(3) . ?
 N14 C14 1.360(3) . ?
 N15 N16 1.370(3) . ?
 N15 C14 1.314(3) . ?
 N16 C12 1.481(3) . ?
 N16 C13 1.340(3) . ?
 N21 C15 1.333(4) . ?
 N21 C16 1.346(4) . ?
 N22 N23 1.362(3) . ?
 N22 C16 1.314(4) . ?
 N23 C15 1.323(3) . ?
 N23 C17 1.488(3) . ?
 N24 C27 1.325(3) . ?
 N24 C28 1.363(3) . ?
 N25 N26 1.367(3) . ?
 N25 C28 1.312(3) . ?
 N26 C26 1.483(3) . ?
 N26 C27 1.339(3) . ?
 C3 C4 1.538(4) . ?
 C3 C5 1.533(3) . ?
 C3 C6 1.530(3) . ?
 C4 C10 1.527(4) . ?
 C5 C12 1.537(4) . ?
 C6 C7 1.541(4) . ?
 C7 C8 1.530(4) . ?
 C7 C9 1.529(4) . ?
 C8 C10 1.538(4) . ?
 C9 C12 1.533(4) . ?
 C10 C11 1.541(4) . ?
 C11 C12 1.530(4) . ?
 C17 C18 1.533(4) . ?
 C17 C19 1.533(4) . ?
 C17 C20 1.536(3) . ?
 C18 C23 1.537(4) . ?
 C19 C21 1.533(4) . ?
 C20 C26 1.536(4) . ?
 C21 C22 1.521(4) . ?
 C21 C25 1.539(4) . ?
 C22 C23 1.533(4) . ?
 C23 C24 1.538(4) . ?
 C24 C26 1.539(3) . ?
 C25 C26 1.522(4) . ?

loop_
  _geom_angle_atom_site_label_1
  _geom_angle_atom_site_label_2
  _geom_angle_atom_site_label_3
  _geom_angle
  _geom_angle_site_symmetry_1
  _geom_angle_site_symmetry_3
  _geom_angle_publ_flag
 O12 Cd1 O11 49.44(7) . . ?
 O21 Cd1 O11 153.69(7) . . ?
 O21 Cd1 O12 155.81(7) . . ?
 O21 Cd1 N24 79.35(7) . 1_455 ?
 N11 Cd1 O11 79.83(8) . . ?
 N11 Cd1 O12 84.50(7) . . ?
 N11 Cd1 O21 103.82(7) . . ?
 N11 Cd1 N14 94.79(8) . 1_655 ?
 N11 Cd1 N21 168.69(8) . . ?
 N11 Cd1 N24 93.47(8) . 1_455 ?
 N14 Cd1 O11 76.23(7) 1_655 . ?
 N14 Cd1 O12 125.03(8) 1_655 . ?
 N14 Cd1 O21 77.49(7) 1_655 . ?
 N14 Cd1 N24 156.66(8) 1_655 1_455 ?
 N21 Cd1 O11 90.12(8) . . ?
 N21 Cd1 O12 85.02(8) . . ?
 N21 Cd1 O21 87.49(8) . . ?
 N21 Cd1 N14 87.76(8) . 1_655 ?
 N21 Cd1 N24 88.39(8) . 1_455 ?
 N24 Cd1 O11 126.80(7) 1_455 . ?
 N24 Cd1 O12 77.48(7) 1_455 . ?
 N3 O11 Cd1 93.02(18) . . ?
 N3 O12 Cd1 97.87(16) . . ?
 N4 O21 Cd1 119.67(17) . . ?
 O11 N3 O12 119.0(2) . . ?
 O13 N3 O11 120.8(3) . . ?
 O13 N3 O12 120.2(3) . . ?
 O22 N4 O21 119.8(2) . . ?
 O22 N4 O23 121.6(2) . . ?
 O23 N4 O21 118.6(2) . . ?
 C1 N11 Cd1 127.63(18) . . ?
 C2 N11 Cd1 126.81(17) . . ?
 C2 N11 C1 102.9(2) . . ?
 C1 N12 N13 102.5(2) . . ?
 N12 N13 C3 119.6(2) . . ?
 C2 N13 N12 109.6(2) . . ?
 C2 N13 C3 130.7(2) . . ?
 C13 N14 Cd1 130.05(18) . 1_455 ?
 C13 N14 C14 102.9(2) . . ?
 C14 N14 Cd1 126.89(17) . 1_455 ?
 C14 N15 N16 102.9(2) . . ?
 N15 N16 C12 120.06(19) . . ?
 C13 N16 N15 109.0(2) . . ?
 C13 N16 C12 130.9(2) . . ?
 C15 N21 Cd1 128.84(18) . . ?
 C15 N21 C16 101.9(2) . . ?
 C16 N21 Cd1 129.2(2) . . ?
 C16 N22 N23 102.8(2) . . ?
 N22 N23 C17 120.7(2) . . ?
 C15 N23 N22 108.9(2) . . ?
 C15 N23 C17 130.1(2) . . ?
 C27 N24 Cd1 131.07(19) . 1_655 ?
 C27 N24 C28 102.3(2) . . ?
 C28 N24 Cd1 126.18(17) . 1_655 ?
 C28 N25 N26 102.5(2) . . ?
 N25 N26 C26 119.4(2) . . ?
 C27 N26 N25 109.2(2) . . ?
 C27 N26 C26 131.4(2) . . ?
 N12 C1 N11 114.8(2) . . ?
 N13 C2 N11 110.3(2) . . ?
 N13 C3 C4 108.7(2) . . ?
 N13 C3 C5 108.8(2) . . ?
 N13 C3 C6 109.6(2) . . ?
 C5 C3 C4 109.9(2) . . ?
 C6 C3 C4 110.2(2) . . ?
 C6 C3 C5 109.6(2) . . ?
 C10 C4 C3 108.8(2) . . ?
 C3 C5 C12 108.3(2) . . ?
 C3 C6 C7 109.2(2) . . ?
 C8 C7 C6 109.4(2) . . ?
 C9 C7 C6 109.4(2) . . ?
 C9 C7 C8 109.2(2) . . ?
 C7 C8 C10 109.6(2) . . ?
 C7 C9 C12 109.1(2) . . ?
 C4 C10 C8 110.1(2) . . ?
 C4 C10 C11 109.5(2) . . ?
 C8 C10 C11 109.5(2) . . ?
 C12 C11 C10 108.4(2) . . ?
 N16 C12 C5 108.5(2) . . ?
 N16 C12 C9 108.6(2) . . ?
 N16 C12 C11 109.6(2) . . ?
 C9 C12 C5 109.9(2) . . ?
 C11 C12 C5 110.0(2) . . ?
 C11 C12 C9 110.3(2) . . ?
 N14 C13 N16 110.6(2) . . ?
 N15 C14 N14 114.7(2) . . ?
 N23 C15 N21 111.2(2) . . ?
 N22 C16 N21 115.2(3) . . ?
 N23 C17 C18 109.7(2) . . ?
 N23 C17 C19 108.7(2) . . ?
 N23 C17 C20 108.8(2) . . ?
 C18 C17 C20 109.7(2) . . ?
 C19 C17 C18 110.1(2) . . ?
 C19 C17 C20 109.8(2) . . ?
 C17 C18 C23 108.7(2) . . ?
 C17 C19 C21 109.2(2) . . ?
 C26 C20 C17 108.2(2) . . ?
 C19 C21 C25 108.9(2) . . ?
 C22 C21 C19 109.6(2) . . ?
 C22 C21 C25 110.3(2) . . ?
 C21 C22 C23 109.7(2) . . ?
 C18 C23 C24 109.8(2) . . ?
 C22 C23 C18 109.7(2) . . ?
 C22 C23 C24 109.0(2) . . ?
 C23 C24 C26 108.8(2) . . ?
 C26 C25 C21 108.7(2) . . ?
 N26 C26 C20 109.0(2) . . ?
 N26 C26 C24 108.5(2) . . ?
 N26 C26 C25 109.1(2) . . ?
 C20 C26 C24 109.8(2) . . ?
 C25 C26 C20 110.6(2) . . ?
 C25 C26 C24 109.8(2) . . ?
 N24 C27 N26 110.7(2) . . ?
 N25 C28 N24 115.2(2) . . ?

_shelx_res_file
;
TITL pot_cd520_a.res in P2(1)/n
    pot_cd520.res
    created by SHELXL-2017/1 at 17:20:48 on 29-Mar-2021
REM Old TITL pot_Cd520 in P2(1)/n
REM SHELXT solution in P2(1)/n
REM R1 0.117, Rweak 0.004, Alpha 0.033, Orientation as input
REM Formula found by SHELXT: C48 Cd
CELL 0.71073 11.3904 13.4621 20.9037 90 93.07 90
ZERR 4 0.0013 0.0012 0.002 0 0.004 0
LATT 1
SYMM 0.5-X,0.5+Y,0.5-Z
SFAC C H Cd N O
UNIT 112 144 4 56 24

L.S. 6
PLAN  20
SIZE 0.05 0.08 0.4
TEMP -123(2)
list 4
fmap 2
ACTA
REM <olex2.extras>
REM <HklSrc "%.\\pot_Cd520.hkl">
REM </olex2.extras>

WGHT    0.031600    1.423900
FVAR       0.08413
CD1   3    0.736574    0.351200    0.416286    11.00000    0.00830    0.01970 =
         0.01921    0.00344    0.00077    0.00120
O11   5    0.824004    0.515027    0.467792    11.00000    0.03297    0.05985 =
         0.03294   -0.00208    0.00575   -0.00847
O12   5    0.680866    0.445745    0.514413    11.00000    0.04951    0.03136 =
         0.03487    0.00350    0.00858   -0.00805
O13   5    0.740799    0.591006    0.543983    11.00000    0.20001    0.01937 =
         0.03206   -0.00493    0.04244   -0.01523
O21   5    0.737633    0.213049    0.344704    11.00000    0.01694    0.03562 =
         0.02656   -0.00698    0.00091   -0.00632
O22   5    0.596011    0.279837    0.284970    11.00000    0.04120    0.03022 =
         0.03242    0.00026    0.00466    0.01086
O23   5    0.648867    0.127824    0.268415    11.00000    0.02773    0.02340 =
         0.02802   -0.00841    0.00124   -0.00244
N3    4    0.748987    0.518020    0.509191    11.00000    0.06166    0.02350 =
         0.01706    0.00207    0.00465   -0.00016
N4    4    0.659900    0.207410    0.298207    11.00000    0.01877    0.02503 =
         0.02246    0.00201    0.00949   -0.00242
N11   4    0.624447    0.466315    0.361851    11.00000    0.01133    0.01861 =
         0.02199    0.00085   -0.00033    0.00019
N12   4    0.568825    0.566646    0.279520    11.00000    0.01025    0.02402 =
         0.02757    0.00635    0.00315   -0.00297
N13   4    0.472538    0.527829    0.307217    11.00000    0.00825    0.01952 =
         0.02054    0.00279    0.00206   -0.00139
N14   4   -0.092743    0.381238    0.358736    11.00000    0.01142    0.01955 =
         0.02617    0.00106    0.00094   -0.00136
N15   4    0.049523    0.353983    0.290115    11.00000    0.01632    0.01366 =
         0.03284   -0.00090    0.00496   -0.00028
N16   4    0.052973    0.450480    0.310962    11.00000    0.00815    0.01443 =
         0.02202    0.00112    0.00052    0.00018
N21   4    0.853350    0.257424    0.487499    11.00000    0.01197    0.03015 =
         0.02479    0.00721   -0.00109    0.00297
N22   4    0.908744    0.145285    0.562763    11.00000    0.01309    0.05592 =
         0.05675    0.03410   -0.00026   -0.00363
N23   4    1.005037    0.190758    0.540253    11.00000    0.01091    0.02478 =
         0.02406    0.00916    0.00242    0.00037
N24   4    1.568865    0.259842    0.449800    11.00000    0.01200    0.02514 =
         0.02180    0.00218   -0.00032   -0.00003
N25   4    1.443163    0.130701    0.455249    11.00000    0.02390    0.02546 =
         0.02005   -0.00610    0.00660   -0.00568
N26   4    1.427881    0.196051    0.504190    11.00000    0.01180    0.01773 =
         0.01880    0.00090    0.00157    0.00113
C1    1    0.656806    0.526773    0.313923    11.00000    0.00944    0.02062 =
         0.02284    0.00082    0.00067   -0.00095
AFIX  43
H1    2    0.736731    0.539338    0.305833    11.00000   -1.20000
AFIX   0
C2    1    0.507521    0.469167    0.355814    11.00000    0.01260    0.02105 =
         0.02231    0.00656    0.00139    0.00092
AFIX  43
H2    2    0.456399    0.434316    0.382391    11.00000   -1.20000
AFIX   0
C3    1    0.353513    0.558758    0.283820    11.00000    0.00651    0.01700 =
         0.02150    0.00250   -0.00077   -0.00027
C4    1    0.330703    0.664530    0.307982    11.00000    0.01367    0.01711 =
         0.02781    0.00091   -0.00158   -0.00355
AFIX  23
H4A   2    0.337241    0.665890    0.355391    11.00000   -1.20000
H4B   2    0.389766    0.710836    0.291793    11.00000   -1.20000
AFIX   0
C5    1    0.263618    0.486705    0.310062    11.00000    0.01075    0.01671 =
         0.01748    0.00295    0.00030    0.00105
AFIX  23
H5A   2    0.270108    0.486725    0.357479    11.00000   -1.20000
H5B   2    0.278665    0.418433    0.294918    11.00000   -1.20000
AFIX   0
C6    1    0.344659    0.556338    0.210556    11.00000    0.01251    0.02132 =
         0.02122    0.00473   -0.00139   -0.00506
AFIX  23
H6A   2    0.360371    0.488261    0.195274    11.00000   -1.20000
H6B   2    0.403936    0.601526    0.193424    11.00000   -1.20000
AFIX   0
C7    1    0.220284    0.589138    0.186639    11.00000    0.01514    0.02717 =
         0.02181    0.00764   -0.00527   -0.00242
AFIX  13
H7    2    0.214017    0.588000    0.138745    11.00000   -1.20000
AFIX   0
C8    1    0.196927    0.694445    0.210448    11.00000    0.01510    0.02279 =
         0.03519    0.01105   -0.00326   -0.00296
AFIX  23
H8A   2    0.117118    0.715868    0.195200    11.00000   -1.20000
H8B   2    0.254506    0.741035    0.193123    11.00000   -1.20000
AFIX   0
C9    1    0.129474    0.518320    0.212828    11.00000    0.01223    0.01851 =
         0.02273    0.00012   -0.00339   -0.00218
AFIX  23
H9A   2    0.143302    0.450022    0.197366    11.00000   -1.20000
H9B   2    0.049367    0.538845    0.197515    11.00000   -1.20000
AFIX   0
C10   1    0.207387    0.696440    0.284073    11.00000    0.01740    0.01074 =
         0.03316    0.00219   -0.00293   -0.00144
AFIX  13
H10   2    0.192100    0.765415    0.299317    11.00000   -1.20000
AFIX   0
C11   1    0.116038    0.625272    0.310730    11.00000    0.01170    0.02040 =
         0.02910   -0.00252    0.00227    0.00101
AFIX  23
H11A  2    0.122136    0.626148    0.358148    11.00000   -1.20000
H11B  2    0.035685    0.646450    0.296326    11.00000   -1.20000
AFIX   0
C12   1    0.140006    0.520537    0.286213    11.00000    0.00791    0.01447 =
         0.02355    0.00065    0.00126   -0.00353
C13   1   -0.032238    0.464303    0.351804    11.00000    0.01156    0.02161 =
         0.02322   -0.00063    0.00219    0.00065
AFIX  43
H13   2   -0.047222    0.525170    0.372870    11.00000   -1.20000
AFIX   0
C14   1   -0.038912    0.316400    0.319926    11.00000    0.01364    0.01517 =
         0.03036    0.00247    0.00292   -0.00081
AFIX  43
H14   2   -0.063312    0.249262    0.314778    11.00000   -1.20000
AFIX   0
C15   1    0.970072    0.257145    0.496585    11.00000    0.01486    0.03175 =
         0.02752    0.01169    0.00215    0.00282
AFIX  43
H15   2    1.021467    0.299128    0.474583    11.00000   -1.20000
AFIX   0
C16   1    0.821561    0.187354    0.529109    11.00000    0.01126    0.05123 =
         0.04696    0.02272    0.00057   -0.00068
AFIX  43
H16   2    0.741775    0.169570    0.533818    11.00000   -1.20000
AFIX   0
C17   1    1.124517    0.170081    0.569438    11.00000    0.00690    0.02032 =
         0.02264    0.00372    0.00142    0.00234
C18   1    1.133545    0.060478    0.589053    11.00000    0.01506    0.02121 =
         0.02376    0.00443    0.00252   -0.00274
AFIX  23
H18A  2    1.119642    0.017538    0.550951    11.00000   -1.20000
H18B  2    1.073385    0.044787    0.619998    11.00000   -1.20000
AFIX   0
C19   1    1.145631    0.236803    0.628333    11.00000    0.01948    0.02084 =
         0.02230    0.00041    0.00601    0.00489
AFIX  23
H19A  2    1.085674    0.223054    0.659754    11.00000   -1.20000
H19B  2    1.138953    0.307458    0.615517    11.00000   -1.20000
AFIX   0
C20   1    1.215622    0.193304    0.519948    11.00000    0.01269    0.01711 =
         0.01711    0.00396   -0.00057    0.00103
AFIX  23
H20A  2    1.202378    0.150237    0.481855    11.00000   -1.20000
H20B  2    1.208396    0.263441    0.506051    11.00000   -1.20000
AFIX   0
C21   1    1.268712    0.216466    0.658775    11.00000    0.01840    0.02616 =
         0.01675   -0.00231    0.00291    0.00101
AFIX  13
H21   2    1.282452    0.259641    0.697380    11.00000   -1.20000
AFIX   0
C22   1    1.278196    0.107984    0.678703    11.00000    0.01726    0.03414 =
         0.01811    0.00638    0.00073    0.00327
AFIX  23
H22A  2    1.219268    0.093084    0.710492    11.00000   -1.20000
H22B  2    1.357305    0.094861    0.698865    11.00000   -1.20000
AFIX   0
C23   1    1.257062    0.041243    0.619774    11.00000    0.01618    0.01951 =
         0.02524    0.00628    0.00382    0.00237
AFIX  13
H23   2    1.263852   -0.029989    0.633030    11.00000   -1.20000
AFIX   0
C24   1    1.350198    0.064617    0.571325    11.00000    0.01593    0.01806 =
         0.02161    0.00312   -0.00095    0.00385
AFIX  23
H24A  2    1.338413    0.021353    0.533225    11.00000   -1.20000
H24B  2    1.429826    0.052001    0.590962    11.00000   -1.20000
AFIX   0
C25   1    1.360542    0.240838    0.609707    11.00000    0.01446    0.02312 =
         0.02188   -0.00238    0.00059   -0.00120
AFIX  23
H25A  2    1.354030    0.311507    0.596901    11.00000   -1.20000
H25B  2    1.440718    0.229291    0.628915    11.00000   -1.20000
AFIX   0
C26   1    1.338547    0.174398    0.551373    11.00000    0.01115    0.01735 =
         0.01538    0.00085    0.00291    0.00023
C27   1    1.503386    0.271643    0.499787    11.00000    0.01295    0.02086 =
         0.02166   -0.00048    0.00054    0.00083
AFIX  43
H27   2    1.509235    0.326268    0.528553    11.00000   -1.20000
AFIX   0
C28   1    1.527708    0.172375    0.424549    11.00000    0.02322    0.02706 =
         0.01876   -0.00286    0.00473   -0.00460
AFIX  43
H28   2    1.558103    0.143651    0.387362    11.00000   -1.20000
AFIX   0
HKLF 4


REM  pot_cd520_a.res in P2(1)/n
REM R1 =  0.0315 for    4920 Fo > 4sig(Fo)  and  0.0465 for all    6089 data
REM    442 parameters refined using      0 restraints

END

WGHT      0.0316      1.4239

REM Highest difference peak  0.749,  deepest hole -0.460,  1-sigma level  0.077
Q1    1   0.7247  0.3944  0.4525  11.00000  0.05    0.75
Q2    1   0.7413  0.4250  0.4226  11.00000  0.05    0.57
Q3    1   0.7643  0.3710  0.3712  11.00000  0.05    0.56
Q4    1   0.7115  0.6071  0.5468  11.00000  0.05    0.52
Q5    1   0.1825  0.8163  0.3332  11.00000  0.05    0.50
Q6    1   0.8186  0.5734  0.5447  11.00000  0.05    0.44
Q7    1   0.7636  0.2973  0.3779  11.00000  0.05    0.37
Q8    1   1.3359  0.1236  0.5607  11.00000  0.05    0.34
Q9    1   0.7131  0.3077  0.4482  11.00000  0.05    0.33
Q10   1  -0.0756  0.3410  0.3525  11.00000  0.05    0.33
Q11   1   0.2000  0.5058  0.3023  11.00000  0.05    0.32
Q12   1   0.2972  0.5349  0.3069  11.00000  0.05    0.32
Q13   1   0.1079  0.4865  0.3016  11.00000  0.05    0.32
Q14   1   0.8439  0.1991  0.4834  11.00000  0.05    0.31
Q15   1   0.3433  0.6056  0.2990  11.00000  0.05    0.31
Q16   1   0.2125  0.6374  0.2043  11.00000  0.05    0.31
Q17   1   0.5160  0.5385  0.2831  11.00000  0.05    0.31
Q18   1   0.7148  0.2648  0.4123  11.00000  0.05    0.30
Q19   1   1.1961  0.0523  0.6047  11.00000  0.05    0.30
Q20   1   0.1379  0.5090  0.2510  11.00000  0.05    0.29
;
_shelx_res_checksum                77285
_shelx_hkl_file
;
   1   0   0   -0.57    0.09
  -1   0   0   -0.65    0.07
  -2   0   0  491.82   12.58
   2   0   0  477.32   12.57
   3   0   0    0.12    0.30
  -3   0   0    0.10    0.29
  -5   0   0   -0.35    0.31
   5   0   0    0.28    0.38
   6   0   0   44.62    1.86
  -6   0   0   46.12    1.84
  -7   0   0   -0.23    0.35
   7   0   0    0.42    0.46
   8   0   0  109.12    3.72
   9   0   0    0.35    0.52
  10   0   0  112.64    4.11
  11   0   0    1.22    0.68
  12   0   0   13.53    1.58
  13   0   0    1.37    0.81
   0  -1   0   -0.05    0.04
   0  -1   0   -0.10    0.04
   0   1   0    0.08    0.06
   0   1   0   -0.12    0.04
  -1  -1   0    1.19    0.14
   1  -1   0    1.53    0.19
   1   1   0    1.53    0.16
  -1   1   0    1.46    0.19
   2  -1   0    0.33    0.26
  -2  -1   0    0.01    0.09
   2   1   0    0.21    0.23
  -2   1   0   -0.09    0.22
   3  -1   0    4.72    0.50
   3   1   0    5.05    0.48
  -3   1   0    5.30    0.53
   4  -1   0   13.21    0.85
   4   1   0   14.01    0.84
   5  -1   0   11.56    0.87
  -5   1   0   10.74    0.80
   5   1   0   10.20    0.84
  -6  -1   0    1.76    0.43
   6  -1   0    2.31    0.55
  -6   1   0    3.39    0.57
   6   1   0    3.13    0.58
  -7  -1   0    0.07    0.31
   7  -1   0   -0.37    0.39
  -7   1   0   -0.09    0.37
   7   1   0    0.07    0.41
   8  -1   0    7.35    0.94
   8   1   0    5.63    0.82
   9  -1   0   27.74    1.70
   9   1   0   25.86    1.62
  10  -1   0   26.53    1.77
  10   1   0   26.21    1.72
  11  -1   0    0.57    0.69
  11   1   0    0.72    0.65
  12  -1   0   24.91    1.89
  12   1   0   23.60    1.84
  13  -1   0   18.50    1.90
  13   1   0   18.84    1.86
   0  -2   0   30.35    0.95
   0  -2   0   31.81    0.95
   0   2   0   32.93    0.96
   0   2   0   30.77    0.95
  -1  -2   0  709.98   18.57
   1  -2   0  720.77   18.62
  -1   2   0  727.97   18.77
   1   2   0  727.64   18.65
  -1   2   0  731.56   18.62
   2  -2   0    0.03    0.28
  -2  -2   0    0.19    0.23
   2  -2   0    0.49    0.28
  -2   2   0    0.06    0.26
   2   2   0    0.32    0.24
  -3  -2   0   85.46    2.62
   3  -2   0   89.03    2.69
   3  -2   0   90.87    2.68
  -3   2   0   91.98    2.69
   3   2   0   85.98    2.61
   4  -2   0   18.41    1.00
  -4  -2   0   19.01    0.92
   4   2   0   20.15    0.97
  -5  -2   0   44.44    1.73
   5  -2   0   48.76    1.87
   5   2   0   50.28    1.81
  -5   2   0   46.48    1.82
  -6  -2   0   11.90    0.81
   6  -2   0   12.28    1.00
   6   2   0   14.29    0.98
  -6   2   0   10.98    0.91
   7  -2   0   80.82    2.98
  -7   2   0   84.35    2.98
   7   2   0   86.36    2.95
   8  -2   0   -0.18    0.47
   8   2   0    0.08    0.44
   9  -2   0   48.50    2.33
   9   2   0   49.39    2.25
  10  -2   0    1.10    0.72
  10   2   0    0.30    0.57
  11  -2   0    3.87    0.96
  11   2   0    6.45    1.05
  12  -2   0    4.62    1.14
  12   2   0    5.44    1.10
  13  -2   0    0.76    0.85
  13   2   0    1.02    0.81
   0  -3   0   -0.05    0.21
   0  -3   0   -0.47    0.20
   0   3   0    0.14    0.21
   0   3   0   -0.08    0.20
  -1  -3   0   35.58    1.17
  -1  -3   0   38.31    1.20
   1  -3   0   37.45    1.24
   1  -3   0   38.14    1.25
   1   3   0   38.43    1.19
  -1   3   0   36.64    1.24
  -1   3   0   37.77    1.23
   2  -3   0    0.73    0.31
   2   3   0    0.98    0.28
  -2   3   0    0.88    0.31
   3  -3   0    8.83    0.70
  -3  -3   0    8.97    0.61
   3   3   0    8.91    0.60
  -3   3   0    8.67    0.68
   4  -3   0   34.56    1.40
   4  -3   0   34.20    1.43
  -4  -3   0   33.42    1.33
   4   3   0   34.04    1.33
  -5  -3   0    7.34    0.70
   5  -3   0    7.80    0.76
   5  -3   0    7.46    0.75
   5   3   0    6.24    0.65
  -5   3   0    9.30    0.81
   6  -3   0    0.09    0.41
  -6  -3   0    0.58    0.38
   6  -3   0    0.83    0.48
   6   3   0    0.46    0.37
  -6   3   0    1.07    0.44
   7  -3   0   12.80    1.18
   7  -3   0   13.52    1.13
  -7   3   0   15.27    1.11
   7   3   0   14.87    1.06
   8  -3   0   15.89    1.34
   8   3   0   18.06    1.26
   9  -3   0   42.69    2.19
   9   3   0   39.84    1.99
  10  -3   0    3.68    0.91
  10   3   0    4.36    0.87
  11  -3   0    7.88    1.24
  11   3   0    5.90    1.02
  12  -3   0   -0.19    0.71
  12   3   0    0.83    0.73
  13  -3   0   16.19    1.91
  13   3   0   14.96    1.65
   0  -4   0   13.68    0.67
   0  -4   0   14.04    0.66
   0   4   0   13.20    0.66
   0   4   0   13.24    0.66
  -1  -4   0   49.37    1.55
  -1  -4   0   48.96    1.53
   1  -4   0   51.15    1.61
   1  -4   0   47.98    1.59
   1   4   0   46.77    1.53
  -1   4   0   51.69    1.59
  -1   4   0   49.23    1.59
   2  -4   0   68.46    2.18
  -2  -4   0   69.52    2.09
  -2   4   0   72.66    2.19
   2   4   0   69.83    2.08
  -2   4   0   67.01    2.17
  -3  -4   0   40.28    1.40
   3  -4   0   39.05    1.50
  -3   4   0   38.94    1.47
   3   4   0   38.81    1.39
   4  -4   0   53.68    1.90
  -4  -4   0   48.90    1.73
   4  -4   0   47.54    1.86
   4   4   0   49.39    1.74
   5  -4   0  120.95    3.85
  -5  -4   0  124.74    3.71
   5  -4   0  125.08    3.85
  -5   4   0  123.17    3.82
   5   4   0  119.83    3.69
   6  -4   0  116.41    3.86
   6  -4   0  122.33    3.88
  -6  -4   0  122.49    3.74
   6   4   0  114.75    3.71
  -6   4   0  120.80    3.86
   7  -4   0   18.18    1.28
  -7   4   0   18.25    1.23
   7   4   0   18.06    1.16
   8  -4   0    3.01    0.72
   8   4   0    4.56    0.74
   9  -4   0    1.79    0.71
   9   4   0    1.39    0.61
  10  -4   0    2.29    0.79
  10   4   0    2.96    0.77
  11  -4   0    6.10    1.19
  11   4   0    6.20    1.02
  12  -4   0    3.30    1.02
  12   4   0    4.24    0.96
  13  -4   0    0.54    0.86
  13   4   0    0.06    0.67
   0  -5   0    0.00    0.25
   0  -5   0   -0.07    0.24
   0   5   0   -0.43    0.22
   0   5   0   -0.12    0.25
  -1  -5   0    5.57    0.49
  -1  -5   0    4.44    0.41
   1  -5   0    5.53    0.50
   1  -5   0    4.34    0.47
  -1   5   0    4.47    0.48
  -1   5   0    4.39    0.46
   1   5   0    4.27    0.42
  -2  -5   0    3.37    0.42
   2  -5   0    3.53    0.48
  -2  -5   0    2.74    0.38
   2  -5   0    2.88    0.42
  -2   5   0    3.77    0.47
  -2   5   0    3.45    0.44
   2   5   0    3.51    0.41
   3  -5   0    4.61    0.59
  -3  -5   0    4.16    0.48
  -3   5   0    4.78    0.57
   3   5   0    3.60    0.44
  -3   5   0    5.07    0.57
   4  -5   0   29.64    1.33
   4  -5   0   31.00    1.42
  -4  -5   0   30.61    1.26
   4   5   0   28.66    1.24
  -5  -5   0    1.81    0.44
   5  -5   0    0.96    0.50
   5  -5   0    1.42    0.48
   5   5   0    1.10    0.40
  -5   5   0    1.42    0.46
   6  -5   0   25.11    1.45
  -6  -5   0   25.03    1.27
   6  -5   0   25.10    1.39
   6   5   0   24.49    1.25
  -6   5   0   23.38    1.34
   7  -5   0    2.70    0.71
  -7   5   0    1.32    0.53
   7   5   0    1.86    0.54
   8  -5   0   10.88    1.22
   8   5   0    9.74    1.00
   9  -5   0   10.73    1.27
   9   5   0   10.54    1.09
  10  -5   0   52.53    2.64
  10   5   0   51.34    2.37
  11  -5   0    1.89    0.89
  11   5   0    2.92    0.82
  12  -5   0   36.77    2.49
  12   5   0   39.22    2.24
  13  -5   0    0.96    0.86
  13   5   0   -0.34    0.70
   0  -6   0  120.34    3.40
   0  -6   0  114.96    3.41
   0   6   0  117.25    3.41
   0   6   0  115.69    3.39
   1  -6   0    1.16    0.34
  -1  -6   0    1.13    0.30
  -1  -6   0    1.06    0.32
  -1   6   0    1.43    0.33
   1   6   0    0.58    0.32
  -2  -6   0   46.91    1.64
   2  -6   0   48.90    1.75
  -2  -6   0   46.53    1.62
   2  -6   0   48.47    1.74
  -2   6   0   48.48    1.75
  -2   6   0   47.78    1.71
   2   6   0   47.59    1.64
   3  -6   0  122.31    3.79
   3  -6   0  125.90    3.82
  -3  -6   0  124.72    3.64
  -3  -6   0  124.73    3.66
  -3   6   0  127.87    3.78
  -3   6   0  124.91    3.80
   3   6   0  125.98    3.65
  -4  -6   0   73.95    2.44
   4  -6   0   74.24    2.61
   4   6   0   77.50    2.45
  -5  -6   0   69.58    2.37
   5  -6   0   66.80    2.55
   5  -6   0   67.84    2.50
   5   6   0   71.68    2.38
  -5   6   0   68.19    2.49
   6  -6   0   14.79    1.17
  -6   6   0   15.67    1.12
   6   6   0   14.45    1.01
   7  -6   0   33.40    1.83
  -7   6   0   34.03    1.75
   7   6   0   36.99    1.67
   8  -6   0   23.22    1.60
   8   6   0   20.57    1.34
   9  -6   0    0.19    0.66
   9   6   0    0.47    0.54
  10  -6   0    7.21    1.18
  10   6   0    8.30    1.09
  11  -6   0   16.74    1.82
  11   6   0   18.89    1.53
  12  -6   0    4.06    1.09
  12   6   0    7.20    1.18
   0  -7   0   -0.16    0.26
   0  -7   0   -0.33    0.27
   0   7   0   -0.23    0.28
   0   7   0   -0.07    0.26
  -1  -7   0   18.18    0.92
   1  -7   0   18.59    0.97
   1  -7   0   16.77    0.93
  -1  -7   0   17.41    0.89
  -1   7   0   17.16    0.92
   1   7   0   15.55    0.89
  -1   7   0   17.19    0.93
  -2  -7   0   13.02    0.80
   2  -7   0   12.95    0.90
  -2  -7   0   13.94    0.80
   2  -7   0   13.89    0.90
  -2   7   0   14.28    0.85
  -2   7   0   13.83    0.90
   2   7   0   15.04    0.84
  -3  -7   0    4.47    0.53
  -3  -7   0    5.28    0.58
   3  -7   0    5.97    0.68
   3  -7   0    4.90    0.65
  -3   7   0    4.66    0.61
  -3   7   0    5.20    0.65
   3   7   0    4.24    0.52
   4  -7   0    0.84    0.49
   4  -7   0    0.83    0.38
  -4  -7   0    0.99    0.39
   4   7   0    0.62    0.35
  -4   7   0    0.72    0.38
  -5  -7   0   32.76    1.45
   5  -7   0   33.87    1.65
  -5   7   0   32.40    1.58
   5   7   0   33.22    1.46
   6  -7   0    1.28    0.60
   6   7   0    1.51    0.48
  -6   7   0    1.36    0.52
   7  -7   0   41.09    2.03
   7   7   0   37.19    1.75
   8  -7   0    0.89    0.71
   8   7   0    0.23    0.48
   9  -7   0   33.16    2.02
   9   7   0   33.49    1.83
  10  -7   0   15.98    1.60
  10   7   0   18.60    1.44
  11  -7   0   27.59    2.17
  11   7   0   24.21    1.68
  12  -7   0   -0.27    0.79
  12   7   0   -0.59    0.63
   0  -8   0    0.63    0.34
   0  -8   0    0.09    0.32
   0   8   0    0.64    0.35
   0   8   0    0.54    0.33
   1  -8   0   62.37    2.21
  -1  -8   0   64.71    2.15
  -1  -8   0   64.41    2.19
   1  -8   0   64.97    2.24
   1   8   0   62.75    2.16
   1   8   0   63.13    2.21
  -1   8   0   66.02    2.22
  -1   8   0   65.70    2.23
  -2  -8   0    3.22    0.50
  -2  -8   0    3.34    0.48
   2  -8   0    2.47    0.52
   2  -8   0    3.06    0.55
  -2   8   0    3.31    0.50
  -2   8   0    3.80    0.58
   2   8   0    2.45    0.43
  -3  -8   0   75.18    2.48
   3  -8   0   75.42    2.64
  -3  -8   0   74.48    2.44
   3  -8   0   75.50    2.64
   3   8   0   72.21    2.45
  -3   8   0   76.46    2.64
   4  -8   0    0.77    0.50
  -4  -8   0    1.11    0.40
  -4  -8   0    1.42    0.44
   4   8   0    1.69    0.43
  -4   8   0    0.97    0.40
   5  -8   0   14.62    1.22
  -5   8   0   15.72    1.12
   5   8   0   14.99    1.00
   6  -8   0   27.28    1.65
   6   8   0   29.19    1.46
  -6   8   0   29.07    1.60
   7  -8   0   20.58    1.58
   7   8   0   22.79    1.34
   8  -8   0   18.65    1.55
   8   8   0   17.76    1.29
   9  -8   0   48.03    2.51
   9   8   0   45.17    2.18
  10  -8   0    1.75    0.84
  10   8   0    2.69    0.77
  11  -8   0    9.13    1.39
  11   8   0    7.64    1.15
  12  -8   0    0.36    0.87
  12   8   0    2.42    0.88
   0  -9   0   -0.15    0.31
   0  -9   0    0.10    0.32
   0   9   0   -0.49    0.28
   0   9   0   -0.48    0.29
   1  -9   0    6.03    0.66
  -1  -9   0    6.20    0.69
  -1  -9   0    6.04    0.64
   1  -9   0    5.81    0.68
   1   9   0    4.98    0.62
  -1   9   0    6.14    0.67
  -1   9   0    5.67    0.69
  -2  -9   0    2.85    0.51
   2  -9   0    2.44    0.55
  -2  -9   0    2.41    0.49
   2   9   0    3.13    0.53
  -2   9   0    2.61    0.51
  -2   9   0    2.36    0.53
  -3  -9   0   62.74    2.21
   3  -9   0   61.53    2.34
  -3  -9   0   59.53    2.15
   3   9   0   63.68    2.21
  -3   9   0   59.80    2.33
  -4  -9   0    4.70    0.63
   4  -9   0    3.96    0.73
  -4   9   0    4.28    0.69
   4   9   0    4.50    0.63
  -4   9   0    3.07    0.64
   5  -9   0    2.66    0.70
  -5   9   0    2.88    0.64
   5   9   0    2.34    0.52
   6  -9   0   41.29    2.06
  -6  -9   0   36.73    1.82
   6   9   0   39.53    1.78
  -6   9   0   39.38    1.93
   7  -9   0    0.66    0.66
   7   9   0    0.29    0.48
   8  -9   0   14.33    1.45
   8   9   0   13.65    1.18
   9  -9   0    7.40    1.21
   9   9   0    8.70    1.08
  10  -9   0    2.42    0.94
  10   9   0    4.67    0.87
  11  -9   0   10.65    1.54
  11   9   0   10.36    1.29
   0 -10   0   92.26    3.02
   0  10   0   91.08    3.05
   0  10   0   95.02    3.06
  -1 -10   0    0.81    0.42
   1 -10   0    0.38    0.42
   1  10   0    0.58    0.38
  -1  10   0    0.78    0.43
  -1  10   0    0.28    0.35
   2 -10   0    9.51    0.90
  -2 -10   0    6.49    0.70
  -2  10   0    5.80    0.76
  -2  10   0    5.36    0.68
   2  10   0    6.78    0.73
   3 -10   0   15.63    1.20
  -3 -10   0   16.52    1.03
  -3  10   0   16.85    1.17
  -3  10   0   16.17    1.13
   3  10   0   17.63    1.07
  -4 -10   0    7.88    0.80
   4 -10   0    8.84    1.00
  -4  10   0    8.83    0.94
  -4  10   0    8.64    0.97
   4  10   0    8.66    0.85
   5 -10   0    8.87    1.08
  -5 -10   0   10.17    0.96
  -5  10   0   10.29    1.06
   5  10   0   10.30    0.96
   6 -10   0   16.96    1.47
  -6 -10   0   15.72    1.15
  -6  10   0   17.72    1.34
   6  10   0   13.55    1.11
  -7 -10   0    2.29    0.73
   7 -10   0    1.98    0.81
   7  10   0    2.96    0.66
   8 -10   0   16.91    1.67
   8  10   0   22.10    1.43
   9 -10   0   -0.39    0.67
   9  10   0    0.24    0.59
  10 -10   0   43.15    2.62
  10  10   0   43.81    2.23
  11  10   0    4.27    0.94
   0 -11   0   -0.12    0.40
   0  11   0   -0.25    0.35
   0  11   0    0.35    0.38
  -1 -11   0    1.33    0.50
   1 -11   0    0.21    0.46
  -1  11   0    0.44    0.38
   1  11   0    0.65    0.43
  -1  11   0    1.09    0.47
   2 -11   0    9.81    0.99
  -2 -11   0   10.30    0.89
   2  11   0   11.01    0.92
  -2  11   0    8.73    0.95
  -3 -11   0    3.26    0.61
   3 -11   0    5.78    0.84
   3  11   0    4.08    0.65
  -3  11   0    3.53    0.70
  -3  11   0    4.68    0.75
   4 -11   0    4.90    0.85
  -4 -11   0    5.57    0.73
  -4  11   0    4.32    0.75
  -4  11   0    4.87    0.83
   4  11   0    4.19    0.69
   5 -11   0    2.37    0.76
  -5 -11   0    2.64    0.60
   5  11   0    3.51    0.67
  -5  11   0    2.05    0.66
  -6 -11   0    6.21    0.83
   6 -11   0    7.68    1.10
   6  11   0    6.52    0.83
   7 -11   0    1.80    0.82
   7  11   0    1.25    0.59
   8 -11   0   10.50    1.37
   8  11   0   13.96    1.28
   9 -11   0    4.09    1.02
   9  11   0    6.81    1.01
  10 -11   0   10.64    1.54
  10  11   0    8.76    1.15
   0 -12   0    2.32    0.60
   0  12   0    2.45    0.58
   0  12   0    2.37    0.60
  -1 -12   0   53.60    2.13
   1 -12   0   51.36    2.19
  -1  12   0   57.42    2.26
  -1  12   0   50.20    2.11
   1  12   0   52.67    2.14
   2 -12   0    4.14    0.79
  -2 -12   0    4.63    0.72
   2  12   0    4.52    0.69
  -2  12   0    5.20    0.79
  -2  12   0    2.49    0.58
  -3 -12   0   59.66    2.23
   3 -12   0   55.72    2.42
  -3  12   0   51.04    2.32
   3  12   0   53.33    2.18
  -3  12   0   57.93    2.37
   4 -12   0    2.18    0.69
  -4 -12   0    0.35    0.54
   4  12   0    0.88    0.50
   5 -12   0    3.68    0.86
   5  12   0    4.49    0.77
   6 -12   0    0.41    0.68
   6  12   0    0.31    0.51
   7 -12   0   24.15    1.87
   7  12   0   23.09    1.51
   8 -12   0    0.68    0.81
   8  12   0    0.21    0.58
   9 -12   0   18.69    1.88
   9  12   0   19.76    1.53
   0 -13   0   -0.07    0.47
   0  13   0    0.09    0.46
   1 -13   0    3.73    0.74
  -1 -13   0    3.26    0.69
   1  13   0    4.52    0.73
  -1  13   0    4.30    0.71
  -2 -13   0    6.49    0.86
   2 -13   0    8.23    1.01
   2  13   0    5.29    0.79
  -2  13   0    6.41    0.89
   3 -13   0    1.71    0.72
  -3  13   0    4.46    0.79
   3  13   0    2.64    0.63
   4 -13   0    9.80    1.21
   4  13   0   11.59    1.08
   5 -13   0    0.14    0.66
   5  13   0   -0.03    0.51
   6 -13   0   -0.27    0.65
   6  13   0   -0.22    0.48
   7 -13   0   19.77    1.85
   7  13   0   22.71    1.52
   8  13   0    1.91    0.68
   0  14   0    6.31    0.88
  -1  14   0    0.99    0.57
   1  14   0    0.72    0.50
  -2  14   0   29.76    1.73
   2  14   0   30.24    1.64
  -3  14   0    1.10    0.59
   3  14   0    0.25    0.48
   4  14   0   11.15    1.10
   5  14   0    0.62    0.55
   6  14   0   27.56    1.63
   7  14   0    2.42    0.72
   0  15   0   -0.46    0.42
  -1  15   0    3.79    0.75
   1  15   0    3.25    0.72
   2  15   0    0.74    0.52
  -2  15   0    0.56    0.55
   3  15   0    0.59    0.55
   4  15   0   -0.81    0.42
   5  15   0   -0.28    0.51
   0  16   0    2.72    0.73
   1  16   0    0.61    0.54
  -1  16   0    0.87    0.56
  -2  16   0   11.12    1.28
   2  16   0    9.92    1.11
   3  16   0    7.00    0.96
  13   0  -1   23.55    1.98
  12   0  -1    0.49    0.65
  11   0  -1    3.50    0.93
  10   0  -1    0.59    0.63
   9   0  -1    0.83    0.56
   8   0  -1   -0.17    0.47
  -7   0   1   -0.39    0.31
   7   0  -1    0.48    0.44
  -6   0   1    0.05    0.32
   6   0  -1   -0.14    0.39
   5   0  -1    0.98    0.40
  -5   0   1    0.92    0.35
   4   0  -1   -0.03    0.32
  -4   0   1   -0.29    0.17
   3   0  -1    1.38    0.35
  -3   0   1    0.28    0.20
   2   0  -1    0.04    0.22
  -2   0   1   -0.01    0.04
   1   0  -1   61.81    1.70
   1   0  -1   62.67    1.71
   0   0  -1   -0.02    0.02
   0   0  -1   -0.04    0.01
   0   0   1   -0.02    0.01
   1   0   1  209.58    5.41
  -1   0  -1  204.57    5.41
   2   0   1   -0.13    0.22
  -2   0  -1    0.27    0.24
   3   0   1   29.25    1.15
   4   0   1   -0.41    0.30
  -4   0  -1    0.04    0.25
   5   0   1  136.22    4.09
  -5   0  -1  137.92    4.11
  -6   0  -1    0.33    0.42
   6   0   1    0.33    0.37
  -7   0  -1  195.25    5.93
   7   0   1  202.97    5.96
   8   0   1   -0.49    0.44
   9   0   1   74.93    2.96
  10   0   1   -0.04    0.61
  11   0   1   92.87    3.69
  12   0   1   -1.06    0.67
  13   0   1  105.08    4.34
  13  -1  -1   38.95    2.47
  13   1  -1   44.48    2.55
  12  -1  -1   15.13    1.63
  12   1  -1   21.68    1.76
  11  -1  -1   12.69    1.45
  11   1  -1   13.66    1.44
  10  -1  -1   17.01    1.50
  10   1  -1   15.10    1.33
   9  -1  -1   83.40    3.23
   9   1  -1   85.74    3.21
   8  -1  -1   39.58    1.88
   8   1  -1   36.54    1.81
   7  -1  -1   40.27    1.86
   7   1  -1   42.24    1.83
  -7   1   1   44.96    1.89
   6  -1  -1    7.92    0.83
   6   1  -1    7.66    0.75
  -6   1   1   10.57    0.85
   5  -1  -1  101.57    3.22
   5   1  -1  103.09    3.18
  -5   1   1  102.72    3.20
   4  -1  -1   41.23    1.59
   4   1  -1   46.01    1.59
   3  -1  -1  176.29    4.72
   3  -1  -1  168.97    4.71
  -3  -1   1  162.38    4.64
  -3   1   1  176.65    4.71
   3   1  -1  164.96    4.64
  -2  -1   1  131.82    3.48
   2  -1  -1  134.42    3.55
   2  -1  -1  122.45    3.53
   2   1  -1  121.35    3.47
  -2   1   1  131.91    3.55
  -1  -1   1  101.18    2.71
   1  -1  -1  103.44    2.79
   1   1  -1  101.47    2.71
  -1   1   1  106.24    2.80
   0  -1  -1  150.64    3.93
   0   1   1  148.68    3.93
   1  -1   1   20.75    0.72
   1   1   1   24.21    0.75
  -1   1  -1   20.44    0.73
   2  -1   1   29.51    1.06
  -2   1  -1   28.77    1.04
  -3  -1  -1    2.88    0.37
   3  -1   1    2.62    0.44
   3   1   1    2.94    0.44
  -3   1  -1    2.21    0.40
   4  -1   1  142.33    4.13
   4   1   1  146.34    4.11
  -4   1  -1  136.10    4.10
  -5  -1  -1   41.85    1.59
   5  -1   1   37.16    1.58
  -5   1  -1   38.68    1.58
   5   1   1   38.61    1.59
  -6  -1  -1   13.80    0.94
   6  -1   1   13.24    1.03
   6   1   1   14.67    1.03
  -6   1  -1   12.13    0.94
   7  -1   1    8.00    0.92
  -7  -1  -1    7.61    0.84
   7   1   1    7.11    0.84
  -7   1  -1    8.32    0.90
   8  -1   1    0.96    0.53
   8   1   1    0.21    0.45
   9  -1   1    1.59    0.67
   9   1   1    0.45    0.56
  10  -1   1    0.56    0.67
  10   1   1    0.60    0.60
  11  -1   1    1.01    0.73
  11   1   1    1.69    0.76
  12  -1   1    0.70    0.75
  12   1   1    0.49    0.67
  13  -1   1    7.27    1.33
  13   1   1    7.03    1.28
  13  -2  -1    4.24    1.16
  13   2  -1    3.80    1.09
  12  -2  -1   17.51    1.81
  12   2  -1   15.14    1.59
  11  -2  -1    2.57    0.85
  11   2  -1    0.55    0.70
  10  -2  -1   -0.12    0.60
  10   2  -1   -0.11    0.55
   9  -2  -1   25.22    1.62
   9   2  -1   22.44    1.46
   8  -2  -1    0.18    0.49
   8  -2  -1   -0.16    0.44
   8   2  -1    0.86    0.51
  -7  -2   1    2.72    0.52
   7  -2  -1    2.71    0.64
   7  -2  -1    1.99    0.54
   7   2  -1    1.83    0.53
  -7   2   1    2.74    0.59
  -6  -2   1    6.09    0.68
   6  -2  -1    7.17    0.78
   6  -2  -1    5.71    0.72
  -6   2   1    6.43    0.74
   6   2  -1    6.40    0.70
   5  -2  -1   13.83    0.95
  -5  -2   1   13.39    0.85
   5  -2  -1   13.18    0.93
  -5   2   1   14.71    0.93
   5   2  -1   13.84    0.88
  -4  -2   1   25.67    1.08
   4  -2  -1   25.57    1.20
   4   2  -1   24.80    1.07
   3  -2  -1    0.70    0.32
  -3  -2   1    1.41    0.33
   3  -2  -1    1.15    0.38
  -3   2   1    1.27    0.36
   3   2  -1    1.26    0.32
  -2  -2   1   20.89    0.78
   2  -2  -1   21.14    0.89
   2  -2  -1   20.79    0.90
   2   2  -1   19.88    0.76
  -2   2   1   20.81    0.88
  -2   2   1   21.23    0.88
   1  -2  -1   83.59    2.72
  -1  -2   1  100.77    2.64
  -1   2   1  106.18    2.78
  -1   2   1  104.38    2.76
   1   2  -1  100.97    2.63
   0  -2  -1   22.28    0.75
   0  -2   1   20.56    0.65
   0  -2   1   21.45    0.67
   0   2  -1   20.64    0.66
   0   2  -1   21.40    0.66
   0   2   1   22.36    0.76
   0   2   1   22.26    0.76
   1  -2   1   88.96    2.49
   1  -2   1   88.08    2.49
  -1   2  -1   89.94    2.50
   1   2   1   93.97    2.51
   2  -2   1   49.78    1.62
   2   2   1   50.83    1.59
  -2   2  -1   50.56    1.61
   3  -2   1    7.97    0.66
  -3   2  -1    8.64    0.65
   3   2   1    7.81    0.62
   4  -2   1  190.78    5.29
  -4   2  -1  183.10    5.26
   4   2   1  184.54    5.23
   5  -2   1    0.42    0.42
  -5  -2  -1    0.03    0.10
  -5   2  -1    0.08    0.32
   5   2   1    0.26    0.36
   6  -2   1  219.42    6.61
  -6   2  -1  238.91    6.65
   6   2   1  229.84    6.56
   7  -2   1   39.21    1.85
  -7   2  -1   42.68    1.87
   7   2   1   39.71    1.80
   8  -2   1   65.47    2.64
   8   2   1   62.84    2.51
   9  -2   1   15.74    1.38
   9   2   1   19.45    1.41
  10  -2   1   13.25    1.39
  10   2   1   12.25    1.28
  11  -2   1    5.98    1.12
  11   2   1    7.74    1.18
  12  -2   1   45.46    2.60
  12   2   1   41.32    2.37
  13  -2   1    1.71    0.91
  13   2   1    1.49    0.86
  13  -3  -1    1.15    0.82
  13   3  -1    1.73    0.86
  12  -3  -1    8.08    1.27
  12   3  -1   10.40    1.33
  11  -3  -1    1.07    0.76
  11   3  -1    2.25    0.77
  10  -3  -1   56.30    2.67
  10   3  -1   53.96    2.47
   9  -3  -1   14.35    1.34
   9   3  -1   11.71    1.17
   8  -3  -1  117.59    4.06
   8   3  -1  118.47    3.90
  -7  -3   1    3.70    0.68
   7  -3  -1    3.43    0.67
   7  -3  -1    5.40    0.76
   7   3  -1    5.16    0.69
  -7   3   1    3.25    0.63
   6  -3  -1  223.86    6.54
  -6  -3   1  229.75    6.43
   6  -3  -1  222.77    6.55
   6   3  -1  227.00    6.41
  -6   3   1  224.82    6.54
   5  -3  -1    0.17    0.35
   5  -3  -1   -0.04    0.39
  -5  -3   1    0.15    0.33
  -5   3   1    0.31    0.36
   5   3  -1    0.18    0.34
   4  -3  -1   55.95    1.91
  -4  -3   1   54.45    1.77
   4  -3  -1   50.11    1.88
   4   3  -1   48.72    1.74
   3  -3  -1    3.08    0.45
  -3  -3   1    3.43    0.40
  -3   3   1    4.64    0.53
  -3   3   1    3.48    0.43
   3   3  -1    3.90    0.41
   2  -3  -1   21.45    0.96
   2  -3  -1   21.57    0.92
  -2  -3   1   22.00    0.83
   2   3  -1   23.44    0.83
  -2   3   1   22.31    0.95
  -2   3   1   23.13    0.99
   1  -3  -1   58.81    1.94
  -1  -3   1   65.76    1.84
  -1  -3   1   64.77    1.83
   1   3  -1   67.55    1.84
  -1   3   1   66.51    1.97
  -1   3   1   68.67    2.00
   0  -3  -1   44.96    1.43
   0  -3   1   47.00    1.36
   0  -3   1   46.14    1.34
   0   3   1   44.80    1.43
   0   3  -1   44.85    1.34
   0   3  -1   46.48    1.35
   0   3   1   44.97    1.44
  -1  -3  -1   22.83    0.86
  -1  -3  -1   21.84    0.86
   1  -3   1   21.70    0.84
   1  -3   1   21.23    0.85
  -1   3  -1   21.16    0.84
  -1   3  -1   22.39    0.84
   1   3   1   22.89    0.86
   2  -3   1  160.84    4.44
  -2  -3  -1  169.76    4.42
  -2   3  -1  158.66    4.42
   2   3   1  152.35    4.39
  -3  -3  -1    6.13    0.53
   3  -3   1    4.80    0.54
  -3   3  -1    5.87    0.57
   3   3   1    5.47    0.51
   4  -3   1   43.64    1.69
   4  -3   1   44.42    1.72
  -4  -3  -1   48.99    1.68
   4   3   1   49.26    1.69
  -4   3  -1   43.14    1.68
  -5  -3  -1    1.60    0.41
   5  -3   1    0.54    0.43
   5   3   1    1.98    0.46
  -5   3  -1    0.49    0.39
  -6  -3  -1    9.58    0.78
   6  -3   1    8.12    0.86
   6   3   1    7.19    0.74
  -6   3  -1    8.34    0.86
   7  -3   1   18.56    1.30
   7   3   1   24.93    1.35
  -7   3  -1   20.78    1.28
   8  -3   1    2.61    0.68
   8   3   1    2.47    0.63
   9  -3   1   12.36    1.31
   9   3   1   10.17    1.10
  10  -3   1    0.61    0.63
  10   3   1    0.69    0.63
  11  -3   1    3.80    0.97
  11   3   1    1.03    0.74
  12  -3   1    1.91    0.92
  12   3   1    0.53    0.69
  13  -3   1    2.02    1.01
  13   3   1    2.74    0.97
  13  -4  -1    4.32    1.13
  13   4  -1    2.50    0.92
  12  -4  -1    3.69    1.02
  12   4  -1    2.25    0.83
  11  -4  -1   16.62    1.68
  11   4  -1   14.07    1.43
  10  -4  -1    6.66    1.12
  10   4  -1    5.62    0.92
   9  -4  -1    1.65    0.69
   9   4  -1    2.03    0.62
   8  -4  -1    3.56    0.81
   8   4  -1    2.91    0.63
   7  -4  -1   -0.35    0.43
   7   4  -1    1.77    0.49
  -7   4   1   -0.01    0.40
  -6  -4   1    2.08    0.47
   6  -4  -1    2.49    0.64
   6  -4  -1    2.22    0.59
  -6   4   1    1.77    0.53
   6   4  -1    2.30    0.50
   5  -4  -1   16.18    1.11
  -5  -4   1   17.16    0.94
   5  -4  -1   15.09    1.04
  -5   4   1   18.91    1.09
   5   4  -1   16.09    0.95
  -4  -4   1    0.26    0.31
   4  -4  -1   -0.08    0.34
   4  -4  -1   -0.05    0.31
   4   4  -1    0.34    0.29
  -4   4   1    0.13    0.26
   3  -4  -1    8.94    0.73
  -3  -4   1    9.58    0.61
  -3   4   1    8.72    0.73
  -3   4   1    9.83    0.70
   3   4  -1    8.80    0.59
   2  -4  -1    2.60    0.42
  -2  -4   1    2.60    0.33
  -2   4   1    2.96    0.43
   2   4  -1    2.56    0.31
  -2   4   1    2.79    0.41
   1  -4  -1   12.20    0.71
  -1  -4   1   14.26    0.61
   1  -4  -1   14.69    0.76
  -1  -4   1   14.88    0.64
  -1   4   1   15.03    0.76
   1   4  -1   15.08    0.63
  -1   4   1   14.60    0.76
   0  -4   1   10.62    0.57
   0  -4  -1   10.54    0.63
   0  -4   1   10.77    0.55
   0  -4  -1   10.73    0.64
   0   4  -1   10.44    0.56
   0   4  -1   13.20    0.57
   0   4   1   10.79    0.64
   0   4   1    9.96    0.63
   1  -4   1    2.42    0.34
  -1  -4  -1    2.97    0.38
  -1  -4  -1    3.29    0.40
   1  -4   1    2.89    0.37
  -1   4  -1    2.97    0.35
  -1   4  -1    3.46    0.39
   1   4   1    3.11    0.37
   2  -4   1    0.13    0.29
  -2  -4  -1    0.30    0.28
   2  -4   1   -0.11    0.24
   2   4   1    0.68    0.29
  -2   4  -1    0.37    0.30
  -2   4  -1   -0.23    0.24
  -3  -4  -1  103.96    3.07
   3  -4   1  106.27    3.16
  -3   4  -1  106.21    3.14
   3   4   1   98.45    3.05
   4  -4   1    2.65    0.47
   4  -4   1    1.67    0.44
  -4  -4  -1    2.18    0.43
  -4   4  -1    1.35    0.39
   4   4   1    2.36    0.43
   5  -4   1   90.09    3.08
  -5  -4  -1   99.09    3.02
   5  -4   1   95.43    3.09
   5   4   1   90.24    2.96
  -5   4  -1   90.88    3.05
  -6  -4  -1   15.43    1.02
   6  -4   1   16.32    1.10
   6  -4   1   13.78    1.12
   6   4   1   12.76    0.97
  -6   4  -1   15.20    1.07
   7  -4   1   34.62    1.78
  -7   4  -1   35.77    1.73
   7   4   1   33.83    1.64
   8  -4   1   24.11    1.61
   8   4   1   24.10    1.42
   9  -4   1   15.20    1.44
   9   4   1   14.74    1.24
  10  -4   1    2.87    0.92
  10   4   1    4.50    0.86
  11  -4   1   35.12    2.25
  11   4   1   43.06    2.24
  12  -4   1   16.32    1.73
  12   4   1   15.27    1.59
  13  -4   1   11.54    1.62
  13   4   1   11.40    1.43
  13  -5  -1   25.51    2.25
  13   5  -1   29.56    2.03
  12  -5  -1    1.56    0.91
  12   5  -1    0.91    0.65
  11  -5  -1   57.26    2.95
  11   5  -1   58.06    2.65
  10  -5  -1    0.22    0.67
  10   5  -1    0.69    0.58
   9  -5  -1   32.76    2.00
   9   5  -1   33.92    1.75
   8  -5  -1   -0.39    0.49
   8   5  -1    0.46    0.48
   7  -5  -1  107.00    3.75
  -7   5   1  108.81    3.71
   7   5  -1  106.89    3.50
   6  -5  -1   27.75    1.55
  -6  -5   1   29.10    1.36
   6  -5  -1   28.55    1.50
   6   5  -1   31.65    1.40
  -6   5   1   29.46    1.51
   5  -5  -1  100.25    3.36
  -5  -5   1  103.46    3.16
  -5   5   1  106.10    3.36
   5   5  -1   99.22    3.14
   4  -5  -1    1.46    0.49
  -4  -5   1    1.41    0.37
   4  -5  -1    1.79    0.45
  -4   5   1    1.32    0.42
   4   5  -1    1.42    0.37
  -3  -5   1  178.45    4.81
   3  -5  -1  172.40    5.00
  -3   5   1  174.09    5.00
   3   5  -1  170.55    4.78
  -3   5   1  171.43    4.96
   2  -5  -1   -0.09    0.22
   2  -5  -1    1.37    0.37
  -2   5   1    1.06    0.32
   1  -5  -1  238.86    6.66
  -1  -5   1  246.93    6.53
  -1  -5   1  242.55    6.55
   1  -5  -1  237.50    6.67
   1   5  -1  246.19    6.54
  -1   5   1  253.99    6.68
  -1   5   1  251.74    6.71
   0  -5   1    9.11    0.56
   0  -5   1    8.75    0.58
   0  -5  -1    9.01    0.64
   0   5  -1   10.74    0.59
   0   5   1    9.73    0.64
  -1  -5  -1  109.29    3.11
  -1  -5  -1  103.81    3.07
   1  -5   1  104.62    3.06
   1  -5   1  102.15    3.04
   1   5   1  108.37    3.09
  -1   5  -1  104.83    3.06
  -1   5  -1  106.95    3.04
  -2  -5  -1   32.26    1.23
   2  -5   1   32.02    1.27
   2  -5   1   31.93    1.26
  -2  -5  -1   31.89    1.22
  -2   5  -1   32.82    1.24
  -2   5  -1   32.75    1.26
   2   5   1   30.72    1.20
   3  -5   1  109.85    3.25
  -3  -5  -1  102.91    3.15
   3  -5   1  106.86    3.24
  -3   5  -1  109.02    3.22
   3   5   1  100.51    3.13
  -4  -5  -1    4.05    0.53
   4  -5   1    3.18    0.55
   4   5   1    4.04    0.53
  -5  -5  -1   25.98    1.23
   5  -5   1   24.02    1.32
   5  -5   1   26.09    1.29
   5   5   1   25.04    1.23
  -5   5  -1   23.93    1.26
   6  -5   1    5.26    0.76
   6  -5   1    5.03    0.78
  -6  -5  -1    7.26    0.79
   6   5   1    5.36    0.70
  -6   5  -1    6.90    0.78
   7  -5   1   48.86    2.17
   7   5   1   46.52    2.00
  -7   5  -1   49.28    2.11
   8  -5   1    1.91    0.67
   8   5   1    2.46    0.64
   9  -5   1   13.59    1.42
   9   5   1   14.69    1.28
  10  -5   1   -0.04    0.71
  10   5   1    2.48    0.76
  11  -5   1    0.81    0.74
  11   5   1    2.18    0.76
  12  -5   1    0.25    0.83
  12   5   1    0.24    0.68
  13  -5   1   -0.15    0.82
  13   5   1   -0.59    0.72
  12  -6  -1    3.10    1.05
  12   6  -1    3.93    0.96
  11  -6  -1   11.49    1.49
  11   6  -1   12.83    1.38
  10  -6  -1    8.02    1.26
  10   6  -1    8.94    1.08
   9  -6  -1    0.34    0.65
   9   6  -1    0.64    0.54
   8  -6  -1    4.85    0.90
   8   6  -1    4.54    0.75
   7  -6  -1    0.47    0.56
   7   6  -1   -0.12    0.37
  -6  -6   1    3.06    0.55
   6  -6  -1    3.78    0.68
   6   6  -1    2.31    0.51
  -6   6   1    3.12    0.60
   5  -6  -1    1.43    0.49
   5  -6  -1    1.08    0.50
  -5  -6   1    0.94    0.40
  -5   6   1    1.37    0.47
   5   6  -1    1.29    0.40
  -4  -6   1    4.68    0.52
   4  -6  -1    4.40    0.60
   4  -6  -1    4.64    0.67
   4   6  -1    4.81    0.52
  -4   6   1    4.08    0.60
  -4   6   1    4.85    0.67
  -3  -6   1   27.70    1.12
  -3  -6   1   27.50    1.10
   3  -6  -1   27.56    1.30
   3   6  -1   26.14    1.08
  -3   6   1   23.33    1.18
  -3   6   1   26.22    1.28
   2  -6  -1   77.25    2.53
  -2  -6   1   77.06    2.33
  -2  -6   1   78.41    2.36
   2  -6  -1   77.99    2.54
   2   6  -1   78.87    2.36
  -2   6   1   79.79    2.56
  -2   6   1   75.76    2.50
  -1  -6   1    2.05    0.35
   1  -6  -1    2.02    0.41
  -1  -6   1    1.69    0.33
   1  -6  -1    1.54    0.39
  -1   6   1    1.60    0.36
   1   6  -1    1.22    0.34
   1   6  -1    1.34    0.31
  -1   6   1    1.59    0.40
   0  -6   1   14.94    0.75
   0  -6   1   14.53    0.76
   0  -6  -1   15.35    0.84
   0  -6  -1   16.22    0.84
   0   6  -1   15.55    0.77
   0   6  -1   13.93    0.75
   0   6   1   14.25    0.81
   0   6   1   16.45    0.85
   1  -6   1   -0.01    0.27
  -1  -6  -1    0.07    0.27
  -1  -6  -1    0.46    0.30
   1  -6   1    0.21    0.29
  -1   6  -1    0.07    0.25
  -1   6  -1    0.28    0.26
   1   6   1    0.27    0.28
   1   6   1    0.08    0.33
  -2  -6  -1   24.72    1.09
  -2  -6  -1   22.78    1.05
   2  -6   1   25.66    1.13
   2  -6   1   24.52    1.11
  -2   6  -1   25.51    1.10
   2   6   1   23.55    1.06
  -2   6  -1   23.37    1.11
  -3  -6  -1   45.06    1.65
   3  -6   1   40.83    1.65
   3  -6   1   45.58    1.72
  -3  -6  -1   44.26    1.65
   3   6   1   44.00    1.62
  -3   6  -1   42.43    1.64
   4  -6   1   18.36    1.04
  -4  -6  -1   16.60    0.96
   4  -6   1   16.35    1.07
   4   6   1   17.16    0.96
  -5  -6  -1   21.75    1.13
   5  -6   1   20.88    1.28
  -5   6  -1   19.48    1.15
   5   6   1   21.08    1.16
   6  -6   1   18.01    1.27
  -6   6  -1   19.05    1.24
   6   6   1   22.18    1.22
   7  -6   1   12.47    1.22
  -7   6  -1   11.35    1.12
   7   6   1   10.13    1.00
   8  -6   1    6.54    1.01
   8   6   1    6.60    0.87
   9  -6   1   18.35    1.56
   9   6   1   18.91    1.40
  10  -6   1   29.82    2.08
  10   6   1   34.85    1.94
  11  -6   1   24.15    1.94
  11   6   1   24.87    1.82
  12  -6   1   20.69    2.00
  12   6   1   23.72    1.81
  12  -7  -1   39.83    2.59
  12   7  -1   37.92    2.16
  11  -7  -1   -0.51    0.71
  11   7  -1    1.25    0.67
  10  -7  -1   62.37    3.02
  10   7  -1   65.56    2.71
   9  -7  -1   32.69    2.00
   9   7  -1   26.22    1.58
   8  -7  -1   36.48    2.05
   8   7  -1   32.09    1.65
   7  -7  -1    0.89    0.58
   7   7  -1    0.49    0.47
   6  -7  -1   37.94    1.88
  -6   7   1   37.82    1.79
   6   7  -1   36.63    1.60
   5  -7  -1    2.69    0.63
  -5  -7   1    2.88    0.51
  -5   7   1    2.77    0.58
   5   7  -1    2.21    0.46
   4  -7  -1  110.99    3.63
  -4  -7   1  114.60    3.37
  -4   7   1  109.88    3.56
  -4   7   1  111.07    3.62
   4   7  -1  110.93    3.36
   3  -7  -1   32.16    1.45
  -3  -7   1   32.69    1.27
   3  -7  -1   34.44    1.51
  -3  -7   1   30.20    1.22
  -3   7   1   31.79    1.45
   3   7  -1   28.69    1.22
   2  -7  -1  157.53    4.68
   2  -7  -1  161.73    4.70
  -2  -7   1  151.07    4.45
  -2  -7   1  161.20    4.51
  -2   7   1  158.78    4.70
   2   7  -1  161.04    4.50
  -2   7   1  166.29    4.70
   1  -7  -1    3.14    0.50
  -1  -7   1    2.17    0.38
   1  -7  -1    2.06    0.43
  -1  -7   1    2.23    0.38
   1   7  -1    2.30    0.38
  -1   7   1    2.36    0.46
  -1   7   1    1.86    0.43
   0  -7   1  121.45    3.58
   0  -7   1  121.59    3.55
   0  -7  -1  118.01    3.65
   0  -7  -1  122.45    3.64
   0   7  -1  126.25    3.59
   0   7   1  120.06    3.64
   0   7  -1  127.87    3.58
   0   7   1  123.28    3.67
   1  -7   1    4.03    0.51
  -1  -7  -1    4.44    0.53
  -1  -7  -1    4.39    0.56
   1  -7   1    4.14    0.50
   1   7   1    4.89    0.56
  -1   7  -1    4.73    0.54
  -1   7  -1    4.48    0.53
   1   7   1    5.66    0.63
   2  -7   1  131.08    3.96
   2  -7   1  136.41    3.99
  -2  -7  -1  133.13    3.95
  -2  -7  -1  130.96    3.92
  -2   7  -1  135.80    3.98
  -2   7  -1  134.45    3.94
   2   7   1  134.86    3.95
  -3  -7  -1    7.13    0.69
  -3  -7  -1    5.71    0.61
   3  -7   1    5.03    0.64
   3  -7   1    5.64    0.67
  -3   7  -1    6.60    0.71
  -3   7  -1    7.13    0.67
   3   7   1    5.53    0.60
   4  -7   1   22.85    1.29
   4  -7   1   23.52    1.26
  -4  -7  -1   22.02    1.23
  -4  -7  -1   23.08    1.18
   4   7   1   24.30    1.19
   5  -7   1    2.33    0.61
  -5   7  -1    2.10    0.52
   5   7   1    2.11    0.50
   6  -7   1   31.97    1.70
   6   7   1   32.91    1.55
  -6   7  -1   28.66    1.54
   7  -7   1    0.59    0.58
   7   7   1    1.33    0.54
  -7   7  -1    1.21    0.53
   8  -7   1   39.80    2.12
   8   7   1   41.04    1.92
   9  -7   1    7.70    1.18
   9   7   1    8.06    1.05
  10  -7   1    1.33    0.78
  10   7   1    1.14    0.69
  11  -7   1   -0.34    0.73
  11   7   1    1.43    0.75
  12  -7   1    1.32    0.92
  12   7   1   -0.56    0.62
  12  -8  -1    5.20    1.30
  12   8  -1    5.83    1.06
  11  -8  -1    0.45    0.80
  11   8  -1    0.43    0.69
  10  -8  -1    2.03    0.88
  10   8  -1    2.58    0.75
   9  -8  -1   10.41    1.35
   9   8  -1    9.59    1.06
   8  -8  -1    1.33    0.72
   8   8  -1    0.82    0.53
   7  -8  -1    6.47    1.00
   7   8  -1    3.91    0.69
   6  -8  -1    3.35    0.77
   6   8  -1    3.38    0.59
  -6   8   1    3.34    0.69
   5  -8  -1   10.74    1.07
  -5   8   1    8.26    0.88
   5   8  -1    7.29    0.74
   4  -8  -1   11.08    1.03
  -4  -8   1   11.51    0.81
  -4  -8   1   11.21    0.80
  -4   8   1    9.61    0.92
   4   8  -1   10.57    0.78
  -4   8   1   11.77    0.98
  -3  -8   1   24.21    1.11
   3  -8  -1   26.16    1.42
   3  -8  -1   26.24    1.39
  -3  -8   1   26.12    1.15
   3   8  -1   24.74    1.13
  -3   8   1   22.84    1.30
   2  -8  -1    1.22    0.45
   2  -8  -1    0.78    0.40
  -2  -8   1    1.15    0.37
  -2  -8   1    1.60    0.37
  -2   8   1    1.15    0.43
  -2   8   1    1.23    0.41
   2   8  -1    1.05    0.34
  -1  -8   1   12.34    0.80
  -1  -8   1   12.47    0.76
   1  -8  -1   12.62    0.91
   1  -8  -1   13.24    0.90
  -1   8   1   13.40    0.86
   1   8  -1   12.36    0.78
  -1   8   1   13.11    0.91
   1   8  -1   11.91    0.86
   0  -8  -1   16.98    0.97
   0  -8  -1   17.70    0.99
   0  -8   1   17.99    0.92
   0  -8   1   15.88    0.91
   0   8   1   17.22    0.98
   0   8  -1   16.63    0.90
   0   8   1   17.80    1.00
   0   8  -1   17.13    0.92
  -1  -8  -1    6.72    0.67
   1  -8   1    8.00    0.71
  -1  -8  -1    7.85    0.75
   1  -8   1    6.94    0.68
  -1   8  -1    7.19    0.67
  -1   8  -1    7.76    0.71
   1   8   1    8.61    0.85
   1   8   1    6.41    0.66
   2  -8   1   50.18    1.87
   2  -8   1   51.76    1.88
  -2  -8  -1   47.34    1.83
  -2  -8  -1   49.92    1.82
   2   8   1   45.88    1.82
  -2   8  -1   50.10    1.87
  -2   8  -1   51.18    1.86
   3  -8   1    0.56    0.41
  -3  -8  -1    0.19    0.36
  -3  -8  -1   -0.19    0.34
   3  -8   1    0.48    0.37
   3   8   1    0.94    0.39
  -3   8  -1    0.24    0.36
  -3   8  -1    0.43    0.31
   4  -8   1  102.91    3.49
  -4  -8  -1  109.08    3.41
  -4  -8  -1  104.95    3.34
   4   8   1  105.01    3.35
  -4   8  -1  107.13    3.44
   5  -8   1    0.19    0.48
  -5  -8  -1    0.48    0.55
   5   8   1    0.28    0.42
  -5   8  -1    0.68    0.43
   6  -8   1   59.10    2.54
   6   8   1   59.83    2.32
  -6   8  -1   64.79    2.51
   7  -8   1    2.16    0.71
   7   8   1    3.39    0.67
   8  -8   1   25.73    1.81
   8   8   1   26.01    1.54
   9  -8   1    3.44    0.87
   9   8   1    4.76    0.83
  10  -8   1   21.44    1.88
  10   8   1   22.82    1.61
  11  -8   1   10.08    1.50
  11   8   1   10.07    1.28
  12  -8   1   14.23    1.75
  12   8   1   14.99    1.58
  11  -9  -1    8.77    1.38
  11   9  -1   10.78    1.27
  10  -9  -1   12.40    1.58
  10   9  -1   13.99    1.33
   9  -9  -1   23.28    1.85
   9   9  -1   26.01    1.58
   8  -9  -1   11.21    1.32
   8   9  -1   11.80    1.12
   7  -9  -1   18.57    1.56
   7   9  -1   15.89    1.18
   6  -9  -1   36.62    1.97
  -6   9   1   35.26    1.82
   6   9  -1   32.38    1.56
  -5  -9   1   13.89    0.95
   5  -9  -1   14.60    1.23
  -5   9   1   11.76    1.03
   5   9  -1   14.22    0.97
  -4  -9   1   16.52    0.97
   4  -9  -1   16.82    1.25
   4   9  -1   15.16    0.96
  -4   9   1   15.46    1.16
  -4   9   1   14.44    1.05
   3  -9  -1   22.00    1.36
  -3  -9   1   24.41    1.13
  -3  -9   1   25.00    1.17
  -3   9   1   23.40    1.35
  -3   9   1   22.05    1.28
   3   9  -1   24.37    1.16
   2  -9  -1   16.08    1.09
  -2  -9   1   15.41    0.90
  -2  -9   1   16.74    0.94
   2   9  -1   16.29    0.92
  -2   9   1   14.80    1.04
  -1  -9   1   66.01    2.21
  -1  -9   1   67.18    2.25
   1  -9  -1   64.89    2.35
   1   9  -1   64.30    2.22
  -1   9   1   66.62    2.38
  -1   9   1   65.83    2.35
   0  -9   1    0.86    0.38
   0  -9  -1    0.87    0.39
   0  -9   1    1.30    0.39
   0  -9  -1    1.29    0.45
   0   9   1    0.75    0.40
   0   9  -1    0.92    0.37
   0   9  -1    1.44    0.41
   0   9   1    1.16    0.43
   1  -9   1   49.06    1.86
  -1  -9  -1   49.14    1.86
  -1  -9  -1   45.63    1.87
   1  -9   1   49.11    1.85
  -1   9  -1   51.57    1.88
   1   9   1   46.98    1.85
  -1   9  -1   51.02    1.84
   2  -9   1   20.14    1.15
  -2  -9  -1   22.03    1.17
  -2  -9  -1   21.04    1.13
  -2   9  -1   20.75    1.14
  -2   9  -1   19.18    1.08
   2   9   1   19.41    1.11
   3  -9   1    2.99    0.62
  -3  -9  -1    3.32    0.57
  -3   9  -1    3.79    0.63
   3   9   1    3.20    0.56
  -4  -9  -1   16.13    1.07
   4  -9   1   16.22    1.22
  -4   9  -1   17.16    1.11
   4   9   1   17.78    1.09
   5  -9   1   54.76    2.32
  -5  -9  -1   52.29    2.10
  -5   9  -1   54.06    2.20
   5   9   1   52.44    2.10
  -6  -9  -1    1.00    0.65
   6  -9   1    1.19    0.65
   6   9   1    0.88    0.48
  -6   9  -1   -0.04    0.43
   7  -9   1   22.19    1.65
   7   9   1   22.49    1.42
   8  -9   1    3.27    0.90
   8   9   1    4.10    0.79
   9  -9   1    0.79    0.72
   9   9   1    1.02    0.61
  10  -9   1   -0.85    0.67
  10   9   1    0.97    0.67
  11  -9   1    1.01    0.96
  11   9   1    1.69    0.77
  11 -10  -1    4.12    1.12
  11  10  -1    3.86    0.91
  10 -10  -1    6.33    1.22
  10  10  -1    6.14    0.98
   9 -10  -1    0.76    0.84
   9  10  -1    2.23    0.70
   8 -10  -1    1.86    0.82
   8  10  -1    2.84    0.68
   7 -10  -1    2.33    0.81
  -7 -10   1    0.82    0.63
   7  10  -1    1.11    0.55
   6 -10  -1    2.36    0.77
  -6 -10   1    0.71    0.48
   6  10  -1    1.53    0.53
  -5 -10   1    2.09    0.52
   5 -10  -1    0.80    0.62
  -5  10   1    1.74    0.54
   5  10  -1    2.06    0.52
   4 -10  -1   16.98    1.30
  -4 -10   1   15.50    0.99
   4  10  -1   13.54    0.98
  -4  10   1   14.73    1.21
  -4  10   1   15.12    1.19
  -3 -10   1   10.03    0.83
   3 -10  -1   10.67    1.07
   3  10  -1    8.68    0.81
  -3  10   1   10.13    1.00
  -3  10   1    9.81    1.02
   2 -10  -1    0.07    0.44
  -2 -10   1   -0.02    0.33
   2  10  -1   -0.12    0.30
  -2  10   1    0.56    0.41
  -2  10   1   -0.07    0.27
  -1 -10   1   12.74    0.88
   1 -10  -1   10.72    0.97
  -1  10   1   12.27    0.93
   1  10  -1   14.08    0.88
  -1  10   1   13.41    0.98
   0 -10  -1    0.95    0.44
   0 -10   1    1.13    0.42
   0  10   1    1.12    0.44
   0  10   1    0.74    0.43
   0  10  -1    1.09    0.41
   0  10  -1    0.81    0.40
   1 -10   1   27.42    1.33
  -1 -10  -1   26.05    1.32
  -1  10  -1   26.82    1.30
  -1  10  -1   25.69    1.30
   1  10   1   26.91    1.36
   2 -10   1    0.16    0.40
  -2 -10  -1   -0.58    0.35
  -2  10  -1    0.44    0.39
  -2  10  -1   -0.02    0.32
   2  10   1    0.31    0.38
  -3 -10  -1   49.53    1.97
   3 -10   1   45.87    2.03
  -3  10  -1   48.57    2.04
   3  10   1   51.23    1.98
  -4 -10  -1   -0.10    0.45
   4 -10   1   -0.43    0.47
   4  10   1   -0.06    0.39
  -4  10  -1    0.04    0.37
  -5 -10  -1   40.91    1.83
   5 -10   1   39.38    2.00
  -5  10  -1   42.66    1.94
   5  10   1   40.03    1.82
   6 -10   1   13.01    1.31
  -6 -10  -1   11.96    1.11
  -6  10  -1   11.30    1.17
   6  10   1   15.04    1.16
   7 -10   1   39.95    2.21
  -7 -10  -1   39.64    1.99
   7  10   1   39.69    1.92
   8 -10   1   -0.41    0.62
   8  10   1    0.29    0.57
   9 -10   1   23.16    1.86
   9  10   1   23.99    1.65
  10 -10   1    0.29    0.71
  10  10   1    0.64    0.69
  10 -11  -1    0.98    0.93
  10  11  -1    1.91    0.76
   9 -11  -1   12.40    1.58
   9  11  -1   13.74    1.33
   8 -11  -1    8.32    1.28
   8  11  -1    9.27    1.05
   7 -11  -1   25.49    1.81
   7  11  -1   21.26    1.38
   6 -11  -1    7.56    1.12
  -6 -11   1    7.34    0.85
   6  11  -1    6.25    0.80
   5 -11  -1   49.11    2.37
  -5 -11   1   50.15    2.00
  -5  11   1   46.87    2.24
   5  11  -1   49.88    2.01
  -4 -11   1    1.02    0.45
   4 -11  -1    1.98    0.73
   4  11  -1    3.19    0.57
  -4  11   1    3.26    0.71
  -4  11   1    3.21    0.68
  -3 -11   1    9.61    0.85
   3 -11  -1    7.65    0.97
   3  11  -1    7.58    0.79
  -3  11   1    9.67    1.03
  -3  11   1    7.88    0.96
  -2 -11   1    4.25    0.61
   2 -11  -1    5.63    0.82
  -2  11   1    4.54    0.73
   2  11  -1    4.68    0.65
  -2  11   1    6.69    0.87
   1 -11  -1   10.17    0.98
  -1 -11   1    9.51    0.85
  -1  11   1    8.12    0.91
   1  11  -1    8.94    0.85
   0 -11  -1   35.17    1.66
   0 -11   1   35.70    1.59
   0  11  -1   37.39    1.61
   0  11  -1   37.07    1.61
   0  11   1   34.22    1.67
   0  11   1   34.78    1.63
   1 -11   1   58.45    2.24
  -1 -11  -1   60.83    2.27
  -1  11  -1   59.67    2.24
   1  11   1   58.09    2.26
  -1  11  -1   54.89    2.15
  -2 -11  -1   -0.05    0.43
   2 -11   1   -0.50    0.40
   2  11   1   -0.25    0.38
  -2  11  -1    0.27    0.40
  -2  11  -1   -0.23    0.33
  -3 -11  -1   66.72    2.50
   3 -11   1   64.57    2.60
  -3  11  -1   68.17    2.59
   3  11   1   67.45    2.49
  -4 -11  -1   31.22    1.56
   4 -11   1   33.01    1.79
   4  11   1   31.04    1.61
  -4  11  -1   30.56    1.64
   5 -11   1   28.82    1.72
  -5 -11  -1   26.27    1.48
   5  11   1   25.23    1.47
  -5  11  -1   23.55    1.49
   6 -11   1   -1.02    0.53
  -6 -11  -1    0.20    0.51
   6  11   1    0.94    0.54
   7 -11   1   -0.08    0.70
   7  11   1    0.53    0.51
   8 -11   1    3.31    0.92
   8  11   1    3.17    0.76
   9 -11   1    1.13    0.77
   9  11   1    0.62    0.64
  10 -11   1   -0.21    0.73
  10  11   1    0.20    0.60
   9 -12  -1   -0.24    0.77
   9  12  -1    1.76    0.67
   8 -12  -1    2.84    0.96
   8  12  -1    1.80    0.67
   7 -12  -1    2.76    0.93
   7  12  -1    3.11    0.71
   6 -12  -1    0.48    0.67
   6  12  -1    1.71    0.58
   5 -12  -1   -0.05    0.59
   5  12  -1    0.27    0.47
  -4 -12   1    0.65    0.47
   4 -12  -1    0.38    0.65
  -4  12   1   -0.14    0.52
   4  12  -1    0.24    0.43
   3 -12  -1    0.67    0.60
  -3 -12   1    1.33    0.48
  -3  12   1   -0.01    0.47
  -3  12   1    1.11    0.52
   3  12  -1    1.18    0.46
  -2 -12   1    2.70    0.56
   2 -12  -1    2.72    0.69
   2  12  -1    2.51    0.56
  -2  12   1    3.18    0.69
  -2  12   1    4.03    0.73
   1 -12  -1    0.47    0.52
  -1 -12   1    1.04    0.50
  -1  12   1    0.85    0.50
   1  12  -1    0.62    0.42
  -1  12   1   -0.13    0.32
   0 -12  -1   19.63    1.31
   0 -12   1   20.53    1.21
   0  12  -1   17.52    1.14
   0  12  -1   17.74    1.14
   0  12   1   16.41    1.16
   0  12   1   17.72    1.24
  -1 -12  -1    2.49    0.61
   1 -12   1    2.95    0.65
   1  12   1    3.05    0.66
  -1  12  -1    1.98    0.54
  -1  12  -1    2.00    0.57
   2 -12   1   15.97    1.24
  -2 -12  -1   16.71    1.16
   2  12   1   15.46    1.18
  -2  12  -1   16.30    1.18
  -3 -12  -1    2.15    0.60
   3 -12   1    1.37    0.61
   3  12   1    1.74    0.58
  -3  12  -1    2.78    0.64
   4 -12   1    7.96    1.03
  -4 -12  -1    7.20    0.89
   4  12   1    7.24    0.89
  -5 -12  -1    1.41    0.62
   5 -12   1    1.14    0.72
   5  12   1    0.94    0.59
   6 -12   1   24.79    1.83
   6  12   1   27.90    1.63
   7 -12   1    0.00    0.69
   7  12   1   -0.10    0.53
   8 -12   1   20.91    1.85
   8  12   1   21.40    1.56
   9 -12   1    1.61    0.89
   9  12   1   -0.09    0.63
   8 -13  -1   10.39    1.47
   8  13  -1    9.79    1.13
   7 -13  -1    9.98    1.39
   7  13  -1   10.56    1.09
   6 -13  -1   29.53    2.04
   6  13  -1   30.03    1.62
   5 -13  -1    1.96    0.79
   5  13  -1    2.03    0.58
   4 -13  -1   26.31    1.77
  -4  13   1   25.84    1.71
   4  13  -1   23.92    1.38
   3 -13  -1   20.73    1.59
   3  13  -1   23.10    1.33
  -3  13   1   21.63    1.50
   2 -13  -1   30.79    1.78
   2  13  -1   30.80    1.54
  -2  13   1   27.38    1.69
   1 -13  -1   12.01    1.18
  -1 -13   1   11.85    1.05
  -1  13   1   11.85    1.18
   1  13  -1   12.99    1.03
   0 -13   1   32.74    1.64
   0 -13  -1   33.32    1.76
   0  13  -1   33.80    1.66
   0  13   1   33.52    1.73
   1 -13   1   13.23    1.18
  -1 -13  -1   16.07    1.25
   1  13   1   13.93    1.19
  -1  13  -1   15.64    1.15
  -2 -13  -1   18.39    1.29
   2 -13   1   15.10    1.31
  -2  13  -1   16.82    1.23
   2  13   1   14.30    1.20
   3 -13   1   10.07    1.12
   3  13   1   12.95    1.11
   4 -13   1   47.70    2.32
   4  13   1   46.12    2.12
   5 -13   1    0.22    0.65
   5  13   1   -0.18    0.49
   6 -13   1    3.66    0.91
   6  13   1    3.78    0.81
   7  13   1    8.54    1.10
   8  13   1    1.62    0.70
   7  14  -1    0.69    0.56
   6  14  -1   -0.03    0.47
   5  14  -1    0.12    0.46
  -4  14   1    0.36    0.55
   4  14  -1   -0.19    0.44
   3  14  -1    4.29    0.73
  -3  14   1    3.41    0.79
  -2  14   1    4.71    0.86
   2  14  -1    4.26    0.69
  -1  14   1    0.56    0.55
   1  14  -1    1.85    0.57
   0  14  -1    5.49    0.82
   0  14   1    6.25    0.89
  -1  14  -1    6.39    0.88
   1  14   1    5.31    0.86
  -2  14  -1    7.41    0.96
   2  14   1    7.68    0.97
   3  14   1   10.16    1.08
   4  14   1    2.10    0.63
   5  14   1   11.85    1.21
   6  14   1    4.40    0.84
   7  14   1   14.58    1.42
   5  15  -1   10.44    1.04
   4  15  -1    0.28    0.48
   3  15  -1   22.10    1.41
  -3  15   1   25.68    1.75
   2  15  -1    0.95    0.52
  -2  15   1    0.44    0.56
  -1  15   1   23.08    1.58
   1  15  -1   21.87    1.39
   0  15   1    3.12    0.69
   0  15  -1    3.63    0.70
   1  15   1    5.66    0.88
  -1  15  -1    5.26    0.85
  -2  15  -1    4.43    0.81
   2  15   1    3.16    0.74
   3  15   1    2.82    0.75
   4  15   1   -0.23    0.51
   5  15   1    5.84    0.91
  -3  16   1    2.23    0.77
   3  16  -1    2.83    0.64
  -2  16   1    0.36    0.55
   2  16  -1    0.03    0.43
  -1  16   1    1.85    0.69
   1  16  -1    1.81    0.65
   0  16  -1    1.19    0.56
   0  16   1    1.28    0.58
   1  16   1    8.52    1.08
  -1  16  -1   11.20    1.20
   2  16   1    2.45    0.70
   3  16   1   10.37    1.17
  13   0  -2    0.41    0.76
  12   0  -2  117.67    4.49
  11   0  -2   -0.22    0.63
  10   0  -2   19.21    1.47
   9   0  -2   -0.18    0.49
   8   0  -2   67.81    2.63
  -7   0   2   -0.03    0.32
   7   0  -2   -0.05    0.39
   6   0  -2   39.28    1.68
  -6   0   2   39.41    1.61
  -5   0   2   -0.16    0.12
   5   0  -2   -0.10    0.35
  -3   0   2   -0.03    0.05
   3   0  -2    0.25    0.29
   2   0  -2  129.88    3.47
   2   0  -2  123.37    3.45
  -1   0   2   -0.28    0.10
  -1   0   2   -0.04    0.09
   1   0  -2   -0.09    0.12
   1   0  -2   -0.15    0.13
   0   0   2   13.64    0.46
   0   0  -2   13.45    0.46
   0   0  -2   13.87    0.46
  -1   0  -2    0.18    0.16
   1   0   2   -0.10    0.15
  -2   0  -2    9.09    0.57
   2   0   2    8.60    0.57
   3   0   2   -0.17    0.34
  -3   0  -2    0.03    0.31
   4   0   2   45.60    1.69
  -5   0  -2    0.17    0.36
   5   0   2   -0.12    0.37
  -6   0  -2    1.11    0.46
   6   0   2    0.91    0.48
   7   0   2   -0.23    0.44
  -7   0  -2    0.22    0.41
   8   0   2   10.41    1.08
   9   0   2    0.37    0.56
  10   0   2   21.25    1.59
  11   0   2   -0.50    0.60
  12   0   2   10.23    1.45
  13   0   2   -0.18    0.77
  13  -1  -2    4.20    1.14
  13   1  -2    4.94    1.10
  12  -1  -2    1.18    0.83
  12   1  -2    1.46    0.76
  11  -1  -2    2.57    0.79
  11   1  -2    2.92    0.79
  10  -1  -2    1.35    0.73
  10   1  -2    1.63    0.71
   9  -1  -2   13.28    1.27
   9   1  -2   13.60    1.29
   8  -1  -2   15.76    1.16
   8  -1  -2   13.75    1.25
   8   1  -2   16.19    1.17
  -7  -1   2    1.51    0.39
   7  -1  -2    1.50    0.53
   7  -1  -2    1.70    0.50
  -7   1   2    2.18    0.53
   7   1  -2    1.57    0.53
  -6  -1   2   21.64    1.10
   6  -1  -2   18.55    1.15
   6  -1  -2   20.14    1.15
  -6   1   2   20.92    1.14
   6   1  -2   20.04    1.14
   5  -1  -2    7.37    0.72
  -5  -1   2    5.31    0.58
  -5   1   2    5.90    0.65
   5   1  -2    5.12    0.58
   4  -1  -2  110.38    3.31
  -4  -1   2  110.09    3.25
   4  -1  -2  110.34    3.33
   4   1  -2  112.87    3.27
   3  -1  -2    1.89    0.37
   3  -1  -2    1.62    0.36
  -3  -1   2    1.71    0.33
   3   1  -2    2.08    0.34
  -3   1   2    2.02    0.36
   2  -1  -2  122.65    3.53
   2  -1  -2  128.44    3.53
  -2  -1   2  124.13    3.44
  -2   1   2  130.34    3.53
  -2   1   2  133.70    3.55
   2   1  -2  125.93    3.44
   1  -1  -2    0.03    0.17
   1  -1  -2    0.02    0.16
  -1  -1   2    0.02    0.10
  -1   1   2    0.13    0.16
  -1   1   2    0.05    0.16
   1   1  -2    0.03    0.10
   1   1  -2    0.21    0.11
   0  -1  -2   74.61    2.08
   0  -1  -2   74.10    2.09
   0  -1   2   74.09    1.98
   0   1  -2   74.36    1.98
   0   1   2   77.25    2.09
   0   1   2   78.53    2.10
  -1  -1  -2   13.92    0.58
   1  -1   2   11.71    0.53
  -1   1  -2   12.53    0.54
   1   1   2   13.07    0.56
  -2  -1  -2    2.81    0.38
   2  -1   2    3.14    0.41
   2   1   2    2.89    0.38
  -2   1  -2    3.20    0.38
   3  -1   2   17.95    0.91
  -3  -1  -2   18.92    0.90
  -3   1  -2   18.44    0.90
   3   1   2   18.39    0.89
   4  -1   2  333.54    8.63
   4   1   2  317.37    8.59
  -4   1  -2  300.53    8.58
   5  -1   2   26.98    1.33
  -5  -1  -2   30.63    1.34
  -5   1  -2   29.48    1.34
   5   1   2   28.38    1.33
   6  -1   2  271.57    7.92
  -6  -1  -2  280.81    7.92
  -6   1  -2  282.96    7.96
   6   1   2  291.53    7.96
  -7  -1  -2   39.78    1.79
   7  -1   2   41.18    1.84
  -7   1  -2   42.42    1.84
   7   1   2   35.26    1.76
   8  -1   2   98.02    3.41
   8   1   2   85.91    3.25
   9  -1   2   24.91    1.64
   9   1   2   25.21    1.63
  10  -1   2   80.82    3.31
  10   1   2   81.02    3.27
  11  -1   2   17.91    1.58
  11   1   2   16.30    1.61
  12  -1   2   10.60    1.46
  12   1   2   10.34    1.42
  13  -1   2    2.82    1.06
  13   1   2    4.45    1.08
  13  -2  -2   19.26    1.95
  13   2  -2   22.80    1.86
  12  -2  -2    3.68    1.00
  12   2  -2    3.20    0.93
  11  -2  -2   84.14    3.58
  11   2  -2   89.06    3.48
  10  -2  -2   24.43    1.72
  10   2  -2   21.52    1.53
   9  -2  -2   91.32    3.42
   9   2  -2   88.53    3.26
   8  -2  -2   34.63    1.81
   8  -2  -2   37.97    1.81
   8   2  -2   32.65    1.65
  -7  -2   2   25.02    1.31
   7  -2  -2   25.62    1.40
   7  -2  -2   23.74    1.39
   7   2  -2   26.60    1.36
  -7   2   2   25.59    1.39
  -6  -2   2   15.04    0.94
   6  -2  -2   14.94    1.01
   6  -2  -2   15.66    1.09
   6   2  -2   15.44    0.99
  -6   2   2   15.54    1.04
   5  -2  -2   92.92    3.00
  -5  -2   2   92.06    2.86
   5  -2  -2   90.32    2.94
  -5   2   2   93.61    2.97
   5   2  -2   88.53    2.85
   4  -2  -2    5.38    0.61
   4  -2  -2    4.09    0.52
  -4  -2   2    4.55    0.49
   4   2  -2    4.88    0.50
   3  -2  -2   31.80    1.27
   3  -2  -2   33.00    1.27
  -3  -2   2   33.08    1.15
  -3   2   2   33.10    1.28
  -3   2   2   34.67    1.27
   3   2  -2   31.52    1.15
   2  -2  -2   71.56    2.16
  -2  -2   2   71.84    2.00
   2  -2  -2   69.19    2.15
  -2   2   2   72.53    2.16
   2   2  -2   69.71    1.99
  -2   2   2   72.15    2.16
   1  -2  -2   16.60    0.72
  -1  -2   2   17.37    0.52
   1  -2  -2   18.39    0.77
  -1   2   2   17.37    0.72
  -1   2   2   18.50    0.76
   1   2  -2   16.31    0.51
   0  -2  -2  173.96    4.78
   0  -2   2  175.86    4.63
   0  -2  -2  181.19    4.79
   0  -2   2  179.33    4.63
   0   2  -2  178.70    4.62
   0   2   2  186.79    4.80
   0   2   2  174.79    4.78
   1  -2   2  160.01    4.33
   1   2   2  167.23    4.39
  -1   2  -2  159.58    4.32
   2  -2   2  142.53    4.05
  -2   2  -2  146.57    4.05
   2   2   2  149.96    4.06
   3  -2   2   12.37    0.77
  -3   2  -2   11.66    0.76
   3   2   2   13.22    0.77
  -4  -2  -2   -0.29    0.18
   4  -2   2    0.28    0.38
   4   2   2    0.14    0.33
  -4   2  -2    0.01    0.27
   5  -2   2    2.01    0.50
  -5  -2  -2    1.48    0.43
  -5   2  -2    1.62    0.45
   5   2   2    2.16    0.48
   6  -2   2   31.11    1.55
  -6  -2  -2   31.61    1.46
  -6   2  -2   35.42    1.59
   6   2   2   33.08    1.52
  -7  -2  -2    2.12    0.51
   7  -2   2    2.37    0.63
  -7   2  -2    2.48    0.60
   7   2   2    2.17    0.60
   8  -2   2    0.15    0.51
   8   2   2    0.80    0.55
   9  -2   2    6.77    0.97
   9   2   2    6.28    0.92
  10  -2   2    0.23    0.62
  10   2   2    0.01    0.58
  11  -2   2   -0.98    0.60
  11   2   2    0.20    0.67
  12  -2   2    0.53    0.75
  12   2   2    1.83    0.85
  13  -2   2   28.11    2.20
  13   2   2   23.36    1.91
  13  -3  -2   -0.51    0.80
  13   3  -2   -0.02    0.69
  12  -3  -2   -0.38    0.73
  12   3  -2    0.36    0.68
  11  -3  -2    1.82    0.82
  11   3  -2    2.88    0.84
  10  -3  -2    0.08    0.62
  10   3  -2    0.97    0.60
   9  -3  -2    3.44    0.76
   9   3  -2    2.15    0.66
   8  -3  -2    0.03    0.53
   8   3  -2    0.76    0.46
  -7  -3   2   35.42    1.58
   7  -3  -2   32.46    1.63
   7  -3  -2   29.86    1.62
   7   3  -2   31.40    1.51
  -7   3   2   32.68    1.62
   6  -3  -2    9.37    0.95
   6  -3  -2    8.97    0.88
  -6  -3   2    7.46    0.72
  -6   3   2    8.25    0.84
   6   3  -2    8.34    0.78
   5  -3  -2   19.28    1.16
  -5  -3   2   20.41    1.03
   5  -3  -2   22.41    1.19
  -5   3   2   21.39    1.14
   5   3  -2   20.60    1.05
  -4  -3   2    5.73    0.52
   4  -3  -2    6.29    0.67
   4  -3  -2    5.67    0.61
   4   3  -2    4.61    0.47
   3  -3  -2   20.44    1.04
  -3  -3   2   25.22    0.96
   3  -3  -2   24.77    1.12
  -3   3   2   30.02    1.18
   3   3  -2   25.01    0.96
  -3   3   2   28.39    1.14
  -2  -3   2    1.06    0.22
   2  -3  -2    1.05    0.30
   2  -3  -2    0.58    0.32
  -2   3   2    1.17    0.32
   2   3  -2    0.80    0.21
  -2   3   2    0.92    0.32
   1  -3  -2    0.86    0.31
  -1  -3   2    0.85    0.17
   1  -3  -2    0.65    0.29
  -1   3   2    1.22    0.29
   0  -3   2   32.45    1.00
   0  -3   2   33.08    1.01
   0   3  -2   32.39    1.01
   0   3   2   34.13    1.18
   0   3  -2   33.84    1.00
   0   3   2   35.63    1.19
   1  -3   2  184.60    5.07
   1  -3   2  183.15    5.06
  -1  -3  -2  193.59    5.15
  -1   3  -2  188.32    5.07
   1   3   2  200.76    5.16
   2  -3   2   33.52    1.24
   2  -3   2   32.87    1.26
   2   3   2   38.42    1.30
  -2   3  -2   35.47    1.25
   3  -3   2  226.48    6.35
   3   3   2  239.35    6.36
  -3   3  -2  229.16    6.34
   4  -3   2   43.34    1.68
  -4   3  -2   43.51    1.63
   4   3   2   41.77    1.62
   5  -3   2  406.11   11.42
  -5   3  -2  426.75   11.43
   5   3   2  431.77   11.39
   6  -3   2    0.66    0.46
   6   3   2    1.53    0.47
  -6   3  -2    0.78    0.41
   7  -3   2  110.82    3.73
   7   3   2  110.30    3.64
  -7   3  -2  106.55    3.66
   8  -3   2   16.24    1.34
   8   3   2   14.32    1.20
   9  -3   2   47.55    2.34
   9   3   2   51.17    2.32
  10  -3   2    2.31    0.81
  10   3   2    3.00    0.79
  11  -3   2   34.89    2.22
  11   3   2   38.94    2.16
  12  -3   2    0.63    0.83
  12   3   2    0.45    0.75
  13  -3   2   30.33    2.26
  13   3   2   31.70    2.22
  13  -4  -2    5.30    1.25
  13   4  -2    6.19    1.21
  12  -4  -2   10.65    1.52
  12   4  -2   13.84    1.47
  11  -4  -2   20.38    1.88
  11   4  -2   22.02    1.62
  10  -4  -2   34.20    2.08
  10   4  -2   38.31    1.99
   9  -4  -2   34.85    1.99
   9   4  -2   37.68    1.83
   8  -4  -2   35.62    1.92
   8   4  -2   34.48    1.66
   7  -4  -2   63.55    2.49
   7  -4  -2   59.59    2.46
   7   4  -2   56.65    2.21
  -7   4   2   64.56    2.47
  -6  -4   2  100.85    3.16
   6  -4  -2   99.94    3.35
   6  -4  -2   99.19    3.39
  -6   4   2   98.98    3.34
   6   4  -2   96.62    3.13
  -5  -4   2    6.65    0.63
   5  -4  -2    7.92    0.80
   5  -4  -2    6.27    0.74
   5   4  -2    5.66    0.59
  -5   4   2    7.20    0.74
  -4  -4   2   41.09    1.42
   4  -4  -2   42.35    1.63
   4  -4  -2   39.49    1.62
  -4   4   2   39.93    1.61
   4   4  -2   37.55    1.39
  -4   4   2   36.57    1.56
  -3  -4   2   17.65    0.76
   3  -4  -2   17.34    0.98
  -3   4   2   16.77    0.94
  -3   4   2   17.27    0.92
   3   4  -2   15.77    0.73
   2  -4  -2   26.76    1.13
  -2  -4   2   26.38    0.91
  -2   4   2   27.07    1.11
  -2   4   2   28.13    1.15
   2   4  -2   25.49    0.90
   1  -4  -2    5.50    0.52
  -1  -4   2    6.24    0.38
  -1  -4   2    7.37    0.41
  -1   4   2    7.44    0.59
   1   4  -2    6.57    0.39
  -1   4   2    6.79    0.58
   0  -4  -2    8.08    0.57
   0  -4  -2   10.18    0.64
   0  -4   2   10.08    0.50
   0  -4   2   10.95    0.53
   0   4   2   11.33    0.66
   0   4  -2   10.78    0.51
   0   4  -2   11.45    0.50
   0   4   2   10.64    0.67
   1  -4   2   54.80    1.69
  -1  -4  -2   56.49    1.80
  -1  -4  -2   54.03    1.77
   1  -4   2   54.23    1.69
   1   4   2   55.68    1.78
  -1   4  -2   55.56    1.68
  -1   4  -2   53.87    1.69
   2  -4   2   29.26    1.17
  -2  -4  -2   29.46    1.19
   2  -4   2   32.23    1.22
   2   4   2   33.19    1.22
  -2   4  -2   31.30    1.17
  -3  -4  -2   14.80    0.85
   3  -4   2   16.27    0.92
   3  -4   2   17.63    0.89
  -3   4  -2   17.25    0.89
   3   4   2   15.94    0.88
  -4  -4  -2    3.52    0.52
   4  -4   2    4.31    0.61
   4   4   2    4.23    0.54
  -4   4  -2    4.17    0.53
   5  -4   2    3.00    0.60
  -5  -4  -2    3.52    0.56
   5  -4   2    3.04    0.54
  -5   4  -2    3.94    0.59
   5   4   2    3.72    0.58
   6  -4   2    3.51    0.64
   6  -4   2    2.16    0.56
  -6  -4  -2    3.18    0.57
   6   4   2    3.21    0.60
  -6   4  -2    3.29    0.62
   7  -4   2    1.72    0.57
  -7   4  -2    0.74    0.47
   7   4   2    1.29    0.50
   8  -4   2    1.73    0.66
   8   4   2    1.78    0.60
   9  -4   2    6.63    1.06
   9   4   2    6.48    0.93
  10  -4   2    7.87    1.18
  10   4   2    6.87    1.07
  11  -4   2    1.83    0.87
  11   4   2    2.80    0.83
  12  -4   2    2.88    1.04
  12   4   2    3.83    0.94
  13  -4   2    3.96    1.16
  13   4   2    3.54    0.98
  13  -5  -2    0.06    0.82
  13   5  -2    1.48    0.80
  12  -5  -2    0.24    0.75
  12   5  -2    0.15    0.69
  11  -5  -2    2.11    0.93
  11   5  -2    2.98    0.81
  10  -5  -2   -0.26    0.60
  10   5  -2    0.36    0.55
   9  -5  -2    1.22    0.70
   9   5  -2    1.45    0.57
   8  -5  -2   15.78    1.44
   8   5  -2   15.24    1.14
   7  -5  -2    1.28    0.60
   7   5  -2    1.77    0.48
  -6  -5   2   31.97    1.37
   6  -5  -2   30.99    1.57
   6  -5  -2   28.96    1.57
  -6   5   2   30.20    1.52
   6   5  -2   27.97    1.33
   5  -5  -2   30.43    1.56
   5  -5  -2   33.42    1.55
  -5  -5   2   33.83    1.34
  -5   5   2   32.47    1.51
   5   5  -2   31.65    1.33
   4  -5  -2   47.25    1.91
   4  -5  -2   49.03    1.90
  -4  -5   2   48.00    1.65
  -4   5   2   49.86    1.88
  -4   5   2   49.49    1.90
   4   5  -2   46.30    1.64
   3  -5  -2    3.13    0.49
   3  -5  -2    2.28    0.49
  -3  -5   2    2.55    0.35
  -3   5   2    3.01    0.51
  -3   5   2    1.82    0.38
   2  -5  -2  144.00    4.39
  -2  -5   2  152.29    4.14
  -2  -5   2  158.04    4.17
  -2   5   2  150.12    4.42
   2   5  -2  156.55    4.16
  -2   5   2  157.43    4.41
  -1  -5   2   11.83    0.56
   1  -5  -2   11.01    0.75
   1   5  -2   13.35    0.59
  -1   5   2   11.07    0.72
  -1   5   2   12.49    0.78
   0  -5  -2  112.48    3.24
   0  -5  -2  109.43    3.25
   0  -5   2  108.19    3.06
   0  -5   2  113.18    3.08
   0   5   2  106.60    3.23
   0   5   2  105.47    3.23
   0   5  -2  112.51    3.07
   0   5  -2  111.05    3.07
  -1  -5  -2    7.21    0.63
   1  -5   2    7.70    0.56
   1  -5   2    7.43    0.56
  -1  -5  -2    7.32    0.64
  -1   5  -2    7.28    0.52
  -1   5  -2    8.62    0.57
   1   5   2    8.69    0.66
  -2  -5  -2   95.16    2.79
   2  -5   2   88.68    2.72
  -2  -5  -2   86.82    2.74
   2  -5   2   89.50    2.73
  -2   5  -2   91.77    2.72
   2   5   2   88.76    2.74
  -3  -5  -2   14.76    0.88
   3  -5   2   16.05    0.91
   3  -5   2   14.23    0.91
   3   5   2   15.95    0.89
  -3   5  -2   15.76    0.88
   4  -5   2   83.20    2.73
   4  -5   2   80.60    2.67
  -4  -5  -2   83.40    2.67
  -4   5  -2   78.28    2.65
   4   5   2   78.94    2.63
   5  -5   2    0.65    0.43
   5  -5   2    0.56    0.30
  -5  -5  -2    0.91    0.37
   5   5   2    1.14    0.44
  -5   5  -2    0.54    0.38
   6  -5   2   47.95    2.06
   6   5   2   49.36    1.97
  -6   5  -2   49.36    2.04
   7  -5   2    5.47    0.85
  -7   5  -2    5.68    0.81
   7   5   2    6.69    0.82
   8  -5   2   44.63    2.21
   8   5   2   43.67    2.03
   9  -5   2   -0.15    0.55
   9   5   2    0.51    0.54
  10  -5   2  129.18    4.68
  10   5   2  124.46    4.43
  11  -5   2    1.45    0.84
  11   5   2    0.94    0.72
  12  -5   2   19.34    1.98
  12   5   2   22.27    1.79
  13  -5   2    0.46    0.91
  13   5   2    1.28    0.88
  12  -6  -2   26.81    2.16
  12   6  -2   24.35    1.77
  11  -6  -2   12.37    1.49
  11   6  -2   13.74    1.34
  10  -6  -2   13.28    1.47
  10   6  -2   14.16    1.31
   9  -6  -2   24.81    1.75
   9   6  -2   23.10    1.47
   8  -6  -2   22.31    1.59
   8   6  -2   22.15    1.33
   7  -6  -2    7.17    0.98
   7   6  -2    6.39    0.74
   6  -6  -2   52.14    2.23
  -6  -6   2   53.45    1.96
   6   6  -2   49.02    1.91
  -6   6   2   56.17    2.23
   5  -6  -2   35.69    1.74
  -5  -6   2   38.57    1.50
   5  -6  -2   40.88    1.79
   5   6  -2   37.37    1.47
  -5   6   2   39.94    1.74
   4  -6  -2   40.51    1.75
  -4  -6   2   42.63    1.49
   4  -6  -2   38.97    1.69
  -4   6   2   38.99    1.71
   4   6  -2   41.70    1.48
  -4   6   2   42.76    1.73
  -3  -6   2   13.51    0.71
  -3  -6   2   14.76    0.75
   3  -6  -2   11.46    0.90
  -3   6   2   12.69    0.93
   3   6  -2   12.84    0.70
   2  -6  -2   32.43    1.40
  -2  -6   2   34.66    1.18
   2  -6  -2   26.65    1.30
  -2  -6   2   34.30    1.17
   2   6  -2   35.01    1.18
  -2   6   2   35.70    1.41
  -2   6   2   33.51    1.42
  -1  -6   2   16.82    0.76
   1  -6  -2   17.04    0.92
   1  -6  -2   16.50    0.94
  -1  -6   2   16.18    0.72
   1   6  -2   17.11    0.74
  -1   6   2   17.90    0.93
  -1   6   2   16.91    0.95
   0  -6  -2   14.44    0.85
   0  -6   2   14.26    0.72
   0  -6   2   13.78    0.72
   0  -6  -2   13.13    0.84
   0   6   2   15.05    0.88
   0   6  -2   15.24    0.71
   0   6  -2   15.48    0.72
   0   6   2   15.85    0.87
   1  -6   2    6.39    0.55
  -1  -6  -2    6.40    0.61
  -1  -6  -2    6.42    0.64
   1  -6   2    6.05    0.53
  -1   6  -2    5.62    0.51
   1   6   2    5.02    0.56
  -1   6  -2    6.63    0.55
   1   6   2    7.02    0.70
   2  -6   2   21.40    1.02
   2  -6   2   20.78    1.03
  -2  -6  -2   22.98    1.10
  -2  -6  -2   22.71    1.08
   2   6   2   20.29    1.03
  -2   6  -2   23.42    1.01
   3  -6   2    3.35    0.51
  -3  -6  -2    4.46    0.58
   3  -6   2    4.72    0.60
  -3   6  -2    3.90    0.50
   3   6   2    3.85    0.52
  -4  -6  -2    0.23    0.36
   4  -6   2    0.52    0.43
   4  -6   2    1.36    0.42
  -4   6  -2    0.43    0.27
   4   6   2    1.19    0.42
   5  -6   2    9.67    0.92
  -5  -6  -2    7.65    0.78
  -5   6  -2    8.45    0.82
   5   6   2    9.33    0.82
   6  -6   2   12.79    1.12
   6   6   2   13.65    1.03
  -6   6  -2   10.92    0.95
   7  -6   2    0.17    0.48
   7   6   2    0.53    0.46
  -7   6  -2   -0.16    0.41
   8  -6   2    2.62    0.77
   8   6   2    3.16    0.73
   9  -6   2    1.60    0.76
   9   6   2    2.61    0.72
  10  -6   2    8.08    1.28
  10   6   2    6.64    1.05
  11  -6   2   13.09    1.52
  11   6   2   12.75    1.42
  12  -6   2   -0.33    0.74
  12   6   2    0.32    0.74
  12  -7  -2    3.41    1.11
  12   7  -2    3.07    0.87
  11  -7  -2    0.51    0.78
  11   7  -2    1.66    0.72
  10  -7  -2    3.00    0.95
  10   7  -2    1.51    0.66
   9  -7  -2   11.77    1.34
   9   7  -2   14.06    1.15
   8  -7  -2    5.40    0.99
   8   7  -2    8.29    0.91
   7  -7  -2   27.77    1.71
   7   7  -2   29.19    1.43
   6  -7  -2   -0.32    0.46
   6   7  -2    0.52    0.39
  -6   7   2    0.10    0.40
   5  -7  -2  124.87    4.11
  -5  -7   2  129.95    3.79
  -5   7   2  122.05    4.09
  -5   7   2  124.73    4.05
   5   7  -2  126.27    3.75
  -4  -7   2    1.24    0.34
   4  -7  -2    0.86    0.36
   4  -7  -2    0.76    0.46
   4   7  -2    0.76    0.32
  -4   7   2    1.13    0.44
  -4   7   2    0.22    0.40
  -3  -7   2   47.65    1.59
  -3  -7   2   48.06    1.62
   3  -7  -2   46.06    1.89
  -3   7   2   47.33    1.90
  -3   7   2   44.37    1.81
   3   7  -2   49.03    1.62
   2  -7  -2    6.57    0.70
  -2  -7   2    5.47    0.51
   2  -7  -2    5.11    0.67
  -2  -7   2    6.25    0.52
  -2   7   2    5.84    0.64
   2   7  -2    7.19    0.55
  -2   7   2    5.92    0.66
  -1  -7   2   82.32    2.55
   1  -7  -2   84.03    2.75
   1  -7  -2   91.10    2.82
  -1  -7   2   84.11    2.52
  -1   7   2   86.27    2.79
   1   7  -2   86.23    2.55
  -1   7   2   84.26    2.75
   0  -7  -2    0.92    0.39
   0  -7   2    0.71    0.31
   0  -7  -2    0.89    0.39
   0  -7   2    0.36    0.27
   0   7   2    0.28    0.35
   0   7  -2    0.84    0.30
   0   7   2    0.44    0.35
   0   7  -2    0.84    0.28
  -1  -7  -2  195.82    5.59
  -1  -7  -2  193.52    5.62
   1  -7   2  206.99    5.52
   1  -7   2  202.56    5.50
  -1   7  -2  202.01    5.51
   1   7   2  190.37    5.59
  -1   7  -2  199.66    5.48
   1   7   2  189.64    5.60
  -2  -7  -2    2.51    0.48
   2  -7   2    2.89    0.47
  -2  -7  -2    2.67    0.49
   2  -7   2    3.49    0.49
   2   7   2    2.94    0.50
  -2   7  -2    2.65    0.44
  -2   7  -2    2.56    0.45
  -3  -7  -2   94.45    3.06
  -3  -7  -2  102.14    3.13
   3  -7   2   94.81    3.09
   3  -7   2   99.88    3.12
  -3   7  -2   96.23    3.05
   3   7   2   94.56    3.06
   4  -7   2   31.56    1.48
  -4  -7  -2   29.21    1.42
  -4  -7  -2   28.22    1.36
   4  -7   2   33.94    1.48
   4   7   2   27.28    1.35
   5  -7   2    1.45    0.55
   5   7   2    3.28    0.57
  -5   7  -2    3.07    0.57
   6  -7   2    1.77    0.59
   6   7   2    2.02    0.55
  -6   7  -2    2.08    0.54
   7  -7   2   52.15    2.31
   7   7   2   47.00    2.09
  -7   7  -2   46.34    2.15
   8  -7   2    4.69    0.93
   8   7   2    3.85    0.78
   9  -7   2   43.79    2.36
   9   7   2   44.79    2.20
  10  -7   2   14.90    1.63
  10   7   2   16.30    1.55
  11  -7   2   45.26    2.68
  11   7   2   49.32    2.52
  12  -7   2    2.11    0.99
  12   7   2    1.12    0.80
  12  -8  -2    1.40    0.99
  12   8  -2    2.55    0.85
  11  -8  -2   17.75    1.83
  11   8  -2   18.81    1.50
  10  -8  -2   19.19    1.82
  10   8  -2   18.30    1.40
   9  -8  -2   29.74    2.03
   9   8  -2   33.20    1.71
   8  -8  -2    0.20    0.64
   8   8  -2    0.30    0.47
   7  -8  -2   43.54    2.17
   7   8  -2   36.20    1.68
   6  -8  -2    4.59    0.84
  -6   8   2    6.76    0.90
   6   8  -2    6.50    0.71
   5  -8  -2   52.03    2.31
  -5  -8   2   58.14    2.02
  -5   8   2   56.44    2.30
  -5   8   2   57.01    2.34
   5   8  -2   58.77    2.03
   4  -8  -2   12.33    1.05
  -4  -8   2   12.43    0.80
  -4  -8   2   12.83    0.79
   4   8  -2   12.95    0.81
  -4   8   2   12.85    1.05
  -4   8   2   12.33    0.95
   3  -8  -2   76.23    2.77
  -3  -8   2   79.44    2.46
  -3  -8   2   81.18    2.49
  -3   8   2   80.06    2.77
  -3   8   2   77.97    2.79
   3   8  -2   79.03    2.47
   2  -8  -2    1.35    0.46
   2  -8  -2    0.99    0.42
  -2  -8   2    1.22    0.33
  -2  -8   2    0.73    0.30
  -2   8   2    0.02    0.26
   2   8  -2    1.06    0.31
  -2   8   2    1.33    0.46
   1  -8  -2    9.73    0.85
  -1  -8   2   10.76    0.69
  -1  -8   2    9.95    0.68
   1  -8  -2   10.34    0.85
  -1   8   2   11.36    0.82
  -1   8   2   10.81    0.87
   1   8  -2   12.26    0.71
   0  -8  -2    2.59    0.50
   0  -8  -2    3.26    0.54
   0  -8   2    2.70    0.42
   0  -8   2    2.03    0.40
   0   8   2    2.13    0.48
   0   8   2    2.28    0.46
   0   8  -2    2.10    0.40
   0   8  -2    2.71    0.41
   1  -8   2   45.82    1.65
  -1  -8  -2   45.94    1.73
   1  -8   2   44.06    1.63
  -1  -8  -2   40.72    1.71
   1   8   2   43.00    1.79
  -1   8  -2   45.68    1.65
   1   8   2   42.80    1.72
  -1   8  -2   43.44    1.60
  -2  -8  -2    0.05    0.34
   2  -8   2    0.00    0.32
   2  -8   2    0.16    0.37
  -2  -8  -2    0.33    0.36
   2   8   2    0.08    0.34
  -2   8  -2    0.20    0.32
  -2   8  -2   -0.05    0.28
   3  -8   2    3.84    0.57
   3  -8   2    3.02    0.59
  -3  -8  -2    3.96    0.58
  -3  -8  -2    3.88    0.60
  -3   8  -2    3.90    0.56
   3   8   2    3.19    0.56
   4  -8   2    2.75    0.60
  -4  -8  -2    3.44    0.58
   4   8   2    3.12    0.56
  -5  -8  -2    0.90    0.60
   5  -8   2    1.06    0.55
  -5   8  -2    0.95    0.44
   5   8   2    1.50    0.48
   6  -8   2    1.39    0.64
  -6   8  -2    3.60    0.67
   6   8   2    3.08    0.64
   7  -8   2    0.48    0.62
   7   8   2    1.75    0.61
  -7   8  -2    2.53    0.65
   8  -8   2    5.56    0.97
   8   8   2    5.71    0.90
   9  -8   2   21.04    1.73
   9   8   2   18.84    1.46
  10  -8   2   -1.01    0.67
  10   8   2    0.73    0.63
  11  -8   2    3.16    1.03
  11   8   2    1.95    0.81
  12  -8   2   -0.11    0.79
  12   8   2    0.03    0.71
  11  -9  -2   -0.28    0.71
  11   9  -2    1.47    0.70
  10  -9  -2    4.93    1.17
  10   9  -2    4.63    0.86
   9  -9  -2    1.29    0.86
   9   9  -2    1.80    0.62
   8  -9  -2    4.51    1.01
   8   9  -2    4.40    0.73
   7  -9  -2    1.18    0.65
   7   9  -2    0.97    0.50
   6  -9  -2   45.73    2.21
  -6  -9   2   42.28    1.87
   6   9  -2   45.72    1.82
  -5  -9   2   14.20    0.93
   5  -9  -2   13.35    1.26
   5   9  -2   14.47    0.93
  -5   9   2   13.44    1.16
  -5   9   2   15.76    1.17
  -4  -9   2   10.48    0.78
  -4  -9   2   11.75    0.79
   4  -9  -2   11.46    1.13
  -4   9   2    9.94    1.02
  -4   9   2   11.51    1.01
   4   9  -2   11.37    0.81
  -3  -9   2   64.64    2.09
  -3  -9   2   62.64    2.06
   3  -9  -2   61.01    2.40
  -3   9   2   56.94    2.30
  -3   9   2   59.00    2.36
   3   9  -2   61.98    2.07
  -2  -9   2    8.71    0.67
   2  -9  -2    9.01    0.90
  -2  -9   2    8.91    0.66
   2   9  -2    7.87    0.64
  -2   9   2    6.91    0.80
  -2   9   2    5.58    0.76
  -1  -9   2   18.45    0.98
  -1  -9   2   18.50    0.93
   1  -9  -2   19.63    1.15
   1   9  -2   17.79    0.95
  -1   9   2   20.63    1.18
   0  -9   2   45.00    1.68
   0  -9   2   44.92    1.66
   0  -9  -2   44.28    1.82
   0   9  -2   47.37    1.69
   0   9  -2   46.68    1.68
   0   9   2   44.64    1.85
   0   9   2   45.08    1.82
   1  -9   2   15.14    0.93
   1  -9   2   15.75    0.94
  -1  -9  -2   13.84    1.01
  -1   9  -2   15.89    0.91
   1   9   2   17.14    1.07
  -1   9  -2   15.95    0.94
  -2  -9  -2   16.05    1.03
   2  -9   2   15.84    1.03
  -2   9  -2   14.72    0.93
  -2   9  -2   15.55    0.98
   2   9   2   14.50    1.01
   3  -9   2   29.23    1.44
  -3  -9  -2   28.51    1.40
   3   9   2   25.85    1.37
  -3   9  -2   26.84    1.31
   4  -9   2   62.71    2.40
  -4  -9  -2   61.93    2.30
  -4   9  -2   54.95    2.23
   4   9   2   63.06    2.32
   5  -9   2   16.70    1.29
  -5  -9  -2   15.34    1.14
  -5   9  -2   17.03    1.16
   5   9   2   17.58    1.19
  -6  -9  -2    9.05    1.03
   6  -9   2   10.34    1.15
  -6   9  -2   12.28    1.15
   6   9   2   10.09    1.01
   7  -9   2   38.60    2.09
   7   9   2   36.52    1.87
   8  -9   2   25.48    1.78
   8   9   2   25.13    1.58
   9  -9   2   11.28    1.36
   9   9   2   13.65    1.38
  10  -9   2    3.76    0.98
  10   9   2    3.82    0.88
  11  -9   2    3.34    1.07
  11   9   2    2.86    0.85
  11  10  -2    4.23    0.89
  10 -10  -2   17.42    1.85
  10  10  -2   19.66    1.45
   9 -10  -2    6.51    1.22
   9  10  -2    8.46    1.02
   8 -10  -2   46.09    2.50
   8  10  -2   44.07    1.99
  -7 -10   2    2.93    0.68
   7 -10  -2    3.16    0.87
   7  10  -2    3.00    0.61
  -6 -10   2   37.07    1.63
   6 -10  -2   35.79    2.04
   6  10  -2   36.08    1.61
  -5 -10   2    0.49    0.40
   5 -10  -2    0.82    0.61
   5  10  -2    0.81    0.42
  -5  10   2    1.13    0.56
  -5  10   2    0.82    0.57
  -4 -10   2    8.80    0.76
   4 -10  -2    7.87    0.99
  -4  10   2    8.63    1.00
   4  10  -2    7.95    0.74
  -4  10   2    9.21    1.04
   3 -10  -2    3.96    0.76
  -3 -10   2    3.75    0.51
  -3  10   2    3.42    0.69
  -3  10   2    3.57    0.68
   3  10  -2    3.25    0.50
   2 -10  -2   52.76    2.21
  -2 -10   2   54.32    1.91
  -2 -10   2   54.02    1.94
  -2  10   2   52.59    2.14
   2  10  -2   56.93    1.94
  -2  10   2   54.23    2.21
   1 -10  -2    1.47    0.52
  -1 -10   2    1.50    0.41
  -1 -10   2    0.88    0.40
  -1  10   2   -0.15    0.25
   1  10  -2    1.03    0.38
  -1  10   2    0.71    0.45
   0 -10  -2   19.45    1.20
   0 -10   2   17.81    1.02
   0  10   2   17.76    1.11
   0  10   2   18.69    1.17
   0  10  -2   18.78    1.02
   0  10  -2   18.13    1.02
  -1 -10  -2    1.02    0.47
   1 -10   2    1.44    0.47
  -1  10  -2    0.94    0.38
  -1  10  -2    0.52    0.36
   1  10   2    0.55    0.42
  -2 -10  -2   12.78    0.99
   2 -10   2   13.48    1.02
   2  10   2   12.19    0.99
  -2  10  -2   12.50    0.94
  -2  10  -2   12.88    0.92
   3 -10   2    2.54    0.59
  -3 -10  -2    2.53    0.59
   3  10   2    2.86    0.63
  -3  10  -2    2.61    0.53
  -4 -10  -2    3.89    0.70
   4 -10   2    6.13    0.83
   4  10   2    4.01    0.70
  -4  10  -2    4.78    0.72
  -5 -10  -2    0.02    0.48
   5 -10   2    0.13    0.54
  -5  10  -2   -0.03    0.42
   5  10   2   -0.19    0.46
   6 -10   2    1.16    0.67
  -6 -10  -2    0.98    0.56
  -6  10  -2    0.63    0.50
   6  10   2    0.71    0.54
  -7 -10  -2    3.81    0.84
   7 -10   2    3.88    0.87
   7  10   2    3.69    0.76
   8 -10   2    1.62    0.74
   8  10   2    0.95    0.64
   9 -10   2    2.71    0.95
   9  10   2    1.84    0.74
  10 -10   2    3.88    1.10
  10  10   2    5.80    1.04
  10 -11  -2    1.56    0.95
  10  11  -2    1.94    0.69
   9 -11  -2    0.93    0.86
   9  11  -2    2.83    0.71
   8 -11  -2    1.01    0.74
   8  11  -2    0.94    0.54
   7 -11  -2    2.15    0.86
   7  11  -2    3.87    0.69
   6 -11  -2    5.74    1.04
   6  11  -2    6.14    0.79
   5 -11  -2    9.18    1.15
  -5 -11   2    7.74    0.79
  -5  11   2   10.12    1.19
   5  11  -2   10.56    0.91
  -5  11   2    9.08    1.12
   4 -11  -2   70.82    2.85
  -4 -11   2   69.91    2.39
  -4  11   2   70.77    2.79
   4  11  -2   66.46    2.37
  -4  11   2   65.82    2.77
   3 -11  -2    8.18    0.99
  -3 -11   2    9.69    0.80
  -3  11   2    7.99    0.98
   3  11  -2    8.91    0.78
  -3  11   2    7.71    0.97
  -2 -11   2   26.59    1.27
   2 -11  -2   28.49    1.59
  -2  11   2   27.38    1.54
  -2  11   2   26.74    1.49
   2  11  -2   28.48    1.30
  -1 -11   2    8.78    0.77
   1 -11  -2    7.13    0.89
   1  11  -2    7.91    0.75
  -1  11   2    6.22    0.83
  -1  11   2    6.52    0.81
   0 -11   2    4.89    0.64
   0 -11  -2    3.76    0.67
   0  11  -2    4.32    0.61
   0  11  -2    3.68    0.58
   0  11   2    3.86    0.70
   1 -11   2   13.95    1.05
  -1 -11  -2   15.30    1.12
  -1  11  -2   13.56    0.96
   1  11   2   13.99    1.11
  -1  11  -2   13.19    0.93
  -2 -11  -2    9.47    0.95
   2 -11   2    7.95    0.87
  -2  11  -2    9.60    0.94
  -2  11  -2    7.46    0.82
   2  11   2    8.03    0.91
   3 -11   2    8.35    0.94
  -3 -11  -2    7.77    0.89
   3  11   2    7.47    0.88
  -4 -11  -2   17.78    1.24
   4 -11   2   19.20    1.39
  -4  11  -2   18.39    1.24
   4  11   2   19.06    1.29
   5 -11   2   10.52    1.17
  -5 -11  -2   10.39    1.02
   5  11   2   10.68    1.07
  -5  11  -2    9.38    1.00
  -6 -11  -2   28.70    1.66
   6 -11   2   30.10    1.85
   6  11   2   30.14    1.67
   7 -11   2   15.69    1.51
  -7 -11  -2   14.92    1.42
   7  11   2   12.51    1.27
   8 -11   2   11.92    1.39
   8  11   2   11.21    1.21
   9 -11   2    1.51    0.83
   9  11   2    1.71    0.77
  10 -11   2    2.07    1.02
  10  11   2    2.86    0.87
   9 -12  -2   26.48    2.21
   9  12  -2   26.58    1.61
   8 -12  -2    2.01    0.92
   8  12  -2    2.31    0.65
   7 -12  -2    6.38    1.17
   7  12  -2    7.21    0.88
   6 -12  -2   -0.25    0.65
   6  12  -2    0.35    0.49
   5 -12  -2   41.49    2.22
   5  12  -2   37.72    1.71
  -5  12   2   39.89    2.13
   4 -12  -2    3.73    0.84
  -4  12   2    2.77    0.72
   4  12  -2    5.55    0.68
  -4  12   2    3.89    0.81
  -3 -12   2    9.76    0.87
   3 -12  -2   10.33    1.15
   3  12  -2    9.62    0.87
  -3  12   2    9.53    1.09
  -3  12   2   10.03    1.10
  -2 -12   2   -0.24    0.39
   2 -12  -2   -0.45    0.49
   2  12  -2   -0.46    0.31
  -2  12   2    0.14    0.43
  -2  12   2   -0.03    0.46
  -1 -12   2   36.37    1.58
   1 -12  -2   35.27    1.84
  -1  12   2   33.97    1.73
   1  12  -2   34.93    1.55
  -1  12   2   37.07    1.80
   0 -12   2   20.92    1.23
   0 -12  -2   20.34    1.38
   0  12  -2   20.82    1.20
   0  12   2   19.53    1.36
   0  12   2   22.26    1.38
   0  12  -2   21.76    1.22
  -1 -12  -2   22.94    1.43
   1 -12   2   22.77    1.32
  -1  12  -2   22.15    1.27
   1  12   2   22.04    1.39
  -1  12  -2   22.44    1.24
   2 -12   2    4.32    0.74
  -2 -12  -2    3.67    0.72
  -2  12  -2    3.69    0.66
  -2  12  -2    3.31    0.61
   2  12   2    3.46    0.70
  -3 -12  -2    3.00    0.67
   3 -12   2    3.11    0.71
   3  12   2    3.56    0.73
   4 -12   2   -0.33    0.54
  -4 -12  -2   -0.24    0.46
   4  12   2   -0.29    0.47
  -5 -12  -2    2.02    0.67
   5 -12   2    1.78    0.72
   5  12   2    3.08    0.74
   6 -12   2    4.07    0.89
   6  12   2    3.06    0.77
   7 -12   2    2.49    0.87
   7  12   2    2.75    0.76
   8 -12   2    1.28    0.82
   8  12   2    0.70    0.66
   9 -12   2    0.00    0.81
   9  12   2    1.23    0.72
   8 -13  -2    1.04    0.90
   8  13  -2    0.12    0.56
   7 -13  -2    4.58    1.14
   7  13  -2    6.01    0.84
   6 -13  -2    0.11    0.74
   6  13  -2    0.20    0.46
   5 -13  -2   27.97    1.95
   5  13  -2   28.55    1.46
   4 -13  -2   -0.28    0.58
  -4  13   2   -0.36    0.49
   4  13  -2   -0.23    0.39
   3 -13  -2   47.71    2.31
  -3  13   2   44.98    2.23
   3  13  -2   44.58    1.86
   2 -13  -2   16.03    1.38
  -2  13   2   14.27    1.36
   2  13  -2   17.56    1.10
   1 -13  -2   19.84    1.42
   1  13  -2   18.01    1.14
  -1  13   2   17.93    1.36
   0 -13   2    2.84    0.64
   0 -13  -2    4.35    0.83
   0  13   2    3.42    0.72
   0  13  -2    3.55    0.64
   1 -13   2   11.56    1.05
  -1 -13  -2   12.58    1.18
   1  13   2   10.66    1.11
  -1  13  -2   10.01    1.01
   2 -13   2   -0.66    0.46
  -2 -13  -2   -0.47    0.50
   2  13   2   -0.28    0.43
  -2  13  -2    0.22    0.44
   3 -13   2   16.84    1.35
  -3 -13  -2   15.83    1.35
   3  13   2   17.93    1.31
   4 -13   2    1.74    0.71
   4  13   2    2.79    0.70
   5 -13   2   23.60    1.83
   5  13   2   22.88    1.56
   6  13   2    1.75    0.71
   7  13   2   25.03    1.71
   8  13   2    1.65    0.76
   7  14  -2    8.21    0.95
   6  14  -2   18.58    1.28
   5  14  -2    2.25    0.59
   4 -14  -2    8.99    1.27
   4  14  -2    9.23    0.94
  -4  14   2   10.57    1.32
   3 -14  -2    3.57    0.88
  -3  14   2    1.92    0.66
   3  14  -2    2.36    0.55
   2 -14  -2    7.82    1.09
   2  14  -2    8.05    0.85
  -2  14   2    6.61    0.98
  -1  14   2    0.47    0.52
   1  14  -2    0.78    0.44
   0  14  -2   -0.04    0.38
   0  14   2   -0.87    0.43
  -1  14  -2    1.61    0.56
   1  14   2    1.30    0.60
   2  14   2    0.48    0.57
   3  14   2    3.47    0.77
   4  14   2    3.52    0.78
   5  14   2    0.98    0.61
   6  14   2   -0.05    0.57
   7  14   2    0.50    0.66
   5  15  -2    1.21    0.54
   4  15  -2    3.82    0.69
  -4  15   2    5.36    0.98
  -3  15   2    0.08    0.58
   3  15  -2    1.22    0.46
   2  15  -2   20.67    1.32
  -2  15   2   25.01    1.70
  -1  15   2    0.36    0.58
   1  15  -2    0.18    0.41
   0  15   2   22.91    1.62
   0  15  -2   25.98    1.48
  -1  15  -2    0.23    0.44
   1  15   2    0.24    0.53
   2  15   2   42.89    2.15
   3  15   2    4.05    0.84
   4  15   2   31.14    1.84
   5  15   2    4.41    0.89
  -3  16   2    3.49    0.92
   3  16  -2    2.39    0.61
  -2  16   2    7.84    1.13
   2  16  -2    9.49    1.01
   1  16  -2    1.42    0.52
  -1  16   2    2.10    0.73
   0  16  -2    0.07    0.46
   0  16   2    0.75    0.62
   1  16   2    0.47    0.54
   2  16   2    1.10    0.65
  13   0  -3    9.92    1.40
  12   0  -3    0.65    0.68
  11   0  -3   22.65    1.71
  10   0  -3   -0.19    0.57
   9   0  -3  253.35    7.23
   9   0  -3  224.73    7.11
   8   0  -3   -0.21    0.43
   8   0  -3   -0.45    0.32
   7   0  -3   20.36    1.26
   7   0  -3   20.54    1.19
   6   0  -3    0.03    0.37
  -6   0   3   -0.02    0.10
   6   0  -3   -0.35    0.22
   5   0  -3  203.92    5.71
   5   0  -3  200.24    5.72
  -4   0   3   -0.02    0.18
   4   0  -3   -0.10    0.29
   4   0  -3    0.28    0.31
  -3   0   3  427.23   11.15
   3   0  -3  428.57   11.15
   3   0  -3  417.92   11.15
  -2   0   3   -0.05    0.21
   2   0  -3    0.06    0.23
   2   0  -3    0.01    0.22
  -2   0   3   -0.12    0.22
   1   0  -3  953.85   25.20
  -1   0   3  997.26   25.33
   1   0  -3  941.10   25.34
  -1   0   3 1000.00   25.37
   0   0  -3   -0.02    0.15
   0   0  -3    0.19    0.15
   0   0   3   -0.19    0.13
  -1   0  -3  841.96   21.61
   1   0   3  813.41   21.45
  -2   0  -3   -0.25    0.27
   2   0   3   -0.35    0.27
  -3   0  -3    8.93    0.66
   3   0   3    8.85    0.69
  -4   0  -3   -0.11    0.24
   4   0   3    0.05    0.34
   5   0   3    1.12    0.44
  -5   0  -3    0.63    0.38
   6   0   3    0.17    0.42
  -6   0  -3    0.30    0.38
  -7   0  -3   96.37    3.38
   7   0   3  102.57    3.43
   8   0   3   -0.06    0.49
   9   0   3   56.18    2.53
  10   0   3    0.43    0.62
  11   0   3    8.51    1.21
  12   0   3    0.10    0.73
  13   0   3    1.95    1.01
  13  -1  -3   11.62    1.53
  13   1  -3   10.67    1.42
  12  -1  -3   16.45    1.71
  12   1  -3   17.48    1.69
  11  -1  -3   26.09    1.80
  11   1  -3   25.08    1.74
  10  -1  -3   12.93    1.35
  10   1  -3   14.21    1.38
  10   1  -3   14.88    1.30
   9  -1  -3   22.53    1.50
   9  -1  -3   23.27    1.54
   9   1  -3   25.79    1.55
   8  -1  -3    4.43    0.72
   8  -1  -3    5.06    0.78
   8   1  -3    5.27    0.78
  -7  -1   3   18.97    1.12
   7  -1  -3   18.73    1.21
   7  -1  -3   17.93    1.15
  -7   1   3   20.65    1.22
   7   1  -3   19.71    1.19
  -6  -1   3   -0.02    0.34
   6  -1  -3    0.15    0.39
   6  -1  -3   -0.34    0.31
  -6   1   3   -0.02    0.33
   6   1  -3    0.37    0.36
   5  -1  -3    6.40    0.69
  -5  -1   3    7.74    0.69
  -5   1   3    6.23    0.64
   5   1  -3    5.90    0.62
   4  -1  -3   44.54    1.62
   4  -1  -3   42.49    1.58
  -4  -1   3   42.86    1.51
   4   1  -3   42.28    1.52
   3  -1  -3    7.25    0.60
   3  -1  -3    7.80    0.63
  -3  -1   3    7.55    0.55
   3   1  -3    8.03    0.55
  -3   1   3    6.94    0.60
   3   1  -3    7.66    0.56
   2  -1  -3  190.53    4.98
   2  -1  -3  183.82    4.96
  -2  -1   3  181.19    4.85
  -2   1   3  178.55    4.94
   2   1  -3  185.06    4.85
  -2   1   3  182.22    4.96
   2   1  -3  178.96    4.85
  -1  -1   3   21.34    0.66
   1  -1  -3   21.87    0.82
   1  -1  -3   21.29    0.81
  -1  -1   3   21.41    0.66
   1   1  -3   21.68    0.66
   1   1  -3   21.46    0.67
  -1   1   3   22.05    0.78
  -1   1   3   20.34    0.79
   0  -1  -3   72.92    2.06
   0  -1   3   69.96    1.94
   0  -1  -3   70.92    2.06
   0   1   3   73.18    2.06
   0   1  -3   70.84    1.94
   0   1   3   75.10    2.06
   1  -1   3   61.69    1.84
  -1  -1  -3   65.71    1.90
  -1   1  -3   62.92    1.85
   1   1   3   66.10    1.91
   2  -1   3  326.45    8.75
  -2  -1  -3  337.47    8.78
  -2   1  -3  329.47    8.75
   2   1   3  332.76    8.78
   3  -1   3   39.04    1.45
  -3  -1  -3   37.32    1.40
  -3   1  -3   39.09    1.42
   3   1   3   38.22    1.42
   4  -1   3    2.17    0.47
   4   1   3    1.31    0.42
  -4   1  -3    1.94    0.43
  -5  -1  -3   13.53    0.94
   5  -1   3   15.29    0.99
  -5   1  -3   12.79    0.90
   5   1   3   12.50    0.93
   6  -1   3   -0.65    0.39
  -6  -1  -3    0.33    0.41
   6   1   3    0.12    0.39
  -6   1  -3   -0.28    0.36
   7  -1   3   50.63    2.12
  -7  -1  -3   46.42    2.02
   7   1   3   49.07    2.07
  -7   1  -3   47.61    2.05
   8  -1   3    4.65    0.85
   8   1   3    3.48    0.70
   9  -1   3    9.45    1.11
   9   1   3   11.59    1.20
  10  -1   3   31.30    1.92
  10   1   3   30.95    1.90
  11  -1   3   21.00    1.77
  11   1   3   19.97    1.66
  12  -1   3    9.11    1.39
  12   1   3    6.61    1.21
  13  -1   3   18.64    1.91
  13   1   3   23.79    2.00
  13  -2  -3    1.74    0.90
  13   2  -3    1.21    0.76
  12  -2  -3   21.98    1.81
  12   2  -3   21.03    1.71
  11  -2  -3    2.36    0.83
  11   2  -3    2.69    0.81
  10  -2  -3   57.19    2.63
  10   2  -3   53.12    2.43
   9  -2  -3    0.47    0.58
   9   2  -3    1.24    0.61
   8  -2  -3   99.98    3.57
   8  -2  -3  104.53    3.63
   8   2  -3  104.39    3.51
   7  -2  -3    3.14    0.65
   7  -2  -3    3.33    0.59
  -7  -2   3    2.24    0.52
   7   2  -3    2.57    0.54
  -7   2   3    3.24    0.59
   6  -2  -3   74.66    2.67
  -6  -2   3   76.54    2.55
   6  -2  -3   77.93    2.67
  -6   2   3   76.84    2.66
   6   2  -3   73.53    2.53
   5  -2  -3   48.27    1.94
   5  -2  -3   53.95    1.96
  -5  -2   3   52.99    1.85
  -5   2   3   52.98    1.95
   5   2  -3   52.73    1.85
   4  -2  -3   50.35    1.79
  -4  -2   3   49.28    1.66
   4  -2  -3   46.93    1.78
   4   2  -3   51.26    1.67
   3  -2  -3  118.85    3.43
  -3  -2   3  115.75    3.26
   3  -2  -3  115.81    3.41
  -3   2   3  115.85    3.42
   3   2  -3  115.40    3.25
  -3   2   3  119.66    3.42
   2  -2  -3  166.53    4.80
   2  -2  -3  175.23    4.82
  -2  -2   3  174.72    4.61
  -2   2   3  179.36    4.82
   2   2  -3  172.36    4.61
  -2   2   3  180.79    4.83
   1  -2  -3    0.24    0.27
   1  -2  -3    0.34    0.28
  -1   2   3    0.55    0.27
  -1   2   3    0.44    0.26
   0  -2  -3  920.46   24.05
   0  -2  -3  948.16   24.06
   0  -2   3  887.83   24.00
   0   2  -3  945.54   24.09
   0   2   3  932.21   24.05
   0   2   3  965.72   24.07
  -1  -2  -3   16.38    0.77
   1  -2   3   16.22    0.68
   1   2   3   15.78    0.77
  -1   2  -3   15.18    0.66
   2  -2   3  599.41   15.45
  -2  -2  -3  572.66   15.48
   2   2   3  595.27   15.49
  -2   2  -3  608.50   15.45
   3  -2   3    4.27    0.51
  -3   2  -3    4.39    0.51
   3   2   3    4.35    0.51
  -4  -2  -3    2.51    0.45
   4  -2   3    2.62    0.50
  -4   2  -3    3.37    0.49
   4   2   3    4.02    0.55
  -5  -2  -3   22.72    1.16
   5  -2   3   18.47    1.14
   5   2   3   20.68    1.16
  -5   2  -3   19.94    1.12
   6  -2   3   18.87    1.20
  -6  -2  -3   19.21    1.17
  -6   2  -3   20.27    1.19
   6   2   3   23.57    1.27
   7  -2   3    2.62    0.61
  -7   2  -3    0.49    0.46
   7   2   3    2.05    0.57
   8  -2   3   62.46    2.65
   8   2   3   68.03    2.65
   9  -2   3   -0.21    0.56
   9   2   3   -0.38    0.48
  10  -2   3    4.64    0.93
  10   2   3    5.97    1.02
  11  -2   3   -0.47    0.61
  11   2   3   -0.05    0.60
  12  -2   3   14.17    1.67
  12   2   3   14.46    1.59
  13  -2   3    0.02    0.84
  13   2   3    0.45    0.82
  13  -3  -3    2.06    0.97
  13   3  -3    1.77    0.84
  12  -3  -3   36.00    2.31
  12   3  -3   35.24    2.12
  11  -3  -3   13.07    1.49
  11   3  -3   10.55    1.25
  10  -3  -3   37.56    2.15
  10   3  -3   37.02    1.96
   9  -3  -3    3.55    0.78
   9   3  -3    2.22    0.63
   8  -3  -3   47.75    2.18
   8   3  -3   44.03    1.93
  -7  -3   3    5.59    0.71
   7  -3  -3    5.60    0.80
   7  -3  -3    6.94    0.89
  -7   3   3    5.83    0.80
   7   3  -3    4.72    0.66
   6  -3  -3    3.62    0.64
   6  -3  -3    3.68    0.63
  -6  -3   3    2.66    0.47
  -6   3   3    4.34    0.65
   6   3  -3    3.85    0.55
  -5  -3   3   17.69    0.93
   5  -3  -3   17.11    1.05
   5  -3  -3   17.36    1.09
   5   3  -3   18.48    0.94
  -5   3   3   17.38    1.06
   4  -3  -3   76.65    2.60
   4  -3  -3   75.25    2.61
  -4  -3   3   83.18    2.43
   4   3  -3   80.82    2.42
  -4   3   3   80.41    2.63
  -4   3   3   83.48    2.62
  -3  -3   3   49.65    1.51
   3  -3  -3   43.55    1.69
  -3   3   3   51.36    1.73
  -3   3   3   48.35    1.74
   3   3  -3   49.65    1.51
   2  -3  -3    2.60    0.40
   2  -3  -3    2.28    0.40
  -2  -3   3    3.07    0.26
  -2   3   3    2.89    0.45
   2   3  -3    3.31    0.29
  -2   3   3    2.76    0.41
   1  -3  -3   33.64    1.24
   0  -3   3   20.50    0.66
   0  -3  -3   20.62    0.91
   0  -3  -3   19.26    0.89
   0  -3   3   19.12    0.65
   0   3   3   20.29    0.90
   0   3  -3   20.23    0.64
   0   3   3   19.69    0.89
  -1  -3  -3   13.16    0.74
  -1  -3  -3   13.21    0.68
   1  -3   3   13.78    0.64
   1   3   3   14.05    0.75
  -1   3  -3   14.86    0.63
   2  -3   3   10.98    0.70
  -2   3  -3   10.51    0.64
   2   3   3   11.14    0.70
   3  -3   3    8.65    0.71
   3   3   3    8.43    0.67
  -3   3  -3    7.51    0.65
   4  -3   3    6.31    0.67
  -4   3  -3    6.48    0.64
   4   3   3    6.20    0.68
   5  -3   3   16.45    1.07
  -5  -3  -3   19.15    1.02
  -5   3  -3   15.63    1.01
  -6  -3  -3   16.66    1.00
   6  -3   3   16.32    1.15
   6   3   3   12.34    0.99
  -6   3  -3   16.96    1.08
   7  -3   3    2.33    0.66
  -7   3  -3    3.37    0.68
   7   3   3    2.18    0.58
   8  -3   3   -0.37    0.51
   8   3   3   -0.30    0.47
   9  -3   3   11.59    1.27
   9   3   3   12.84    1.28
  10  -3   3   16.05    1.59
  10   3   3   15.14    1.49
  11  -3   3    0.62    0.75
  11   3   3    1.40    0.75
  12  -3   3   48.29    2.73
  12   3   3   50.95    2.65
  13  -3   3    3.07    1.07
  13   3   3    3.19    1.02
  13  -4  -3   15.34    1.76
  13   4  -3   15.24    1.63
  12  -4  -3    1.83    0.89
  12   4  -3    1.87    0.74
  11  -4  -3    2.08    0.83
  11   4  -3    1.21    0.69
  10  -4  -3   -0.19    0.64
  10   4  -3    0.23    0.53
   9  -4  -3    3.57    0.82
   9   4  -3    3.82    0.72
   8  -4  -3    3.49    0.77
   8   4  -3    3.56    0.63
   7  -4  -3   55.52    2.33
   7  -4  -3   54.29    2.33
   7   4  -3   57.17    2.13
   6  -4  -3    4.91    0.72
  -6  -4   3    5.47    0.62
   6  -4  -3    5.18    0.78
   6   4  -3    5.30    0.61
  -6   4   3    5.36    0.71
   5  -4  -3   93.15    3.11
   5  -4  -3   91.53    3.08
  -5  -4   3   93.97    2.85
   5   4  -3   90.62    2.84
  -5   4   3   95.71    3.09
   4  -4  -3  112.06    3.44
   4  -4  -3  108.95    3.44
  -4  -4   3  113.91    3.18
  -4   4   3  106.87    3.40
   4   4  -3  108.01    3.16
  -4   4   3  107.33    3.43
   3  -4  -3   80.34    2.60
   3  -4  -3   77.78    2.59
  -3  -4   3   82.46    2.31
   3   4  -3   78.85    2.29
  -3   4   3   79.13    2.59
   2  -4  -3  108.31    3.29
  -2  -4   3  109.93    2.97
   2   4  -3  106.73    2.95
  -2   4   3  113.78    3.32
  -2   4   3  112.20    3.28
  -1  -4   3   14.30    0.52
   1  -4  -3   14.50    0.81
  -1  -4   3   14.48    0.50
  -1   4   3   14.91    0.82
   1   4  -3   14.33    0.51
  -1   4   3   16.06    0.83
   0  -4   3    9.38    0.46
   0  -4   3    9.75    0.46
   0   4   3    9.55    0.66
   0   4  -3    9.17    0.43
   0   4   3   10.31    0.67
  -1  -4  -3   83.96    2.58
   1  -4   3   84.78    2.45
   1  -4   3   82.80    2.45
   1   4   3   94.03    2.64
  -1   4  -3   82.55    2.43
   2  -4   3   94.69    2.80
   2  -4   3   94.04    2.80
  -2   4  -3   95.78    2.79
   2   4   3   94.63    2.87
   3  -4   3  163.69    4.75
   3  -4   3  170.58    4.76
  -3   4  -3  167.44    4.74
   3   4   3  166.72    4.77
   4  -4   3   11.22    0.86
  -4  -4  -3   11.16    0.76
   4   4   3   12.08    0.84
  -4   4  -3   10.57    0.79
   5  -4   3   67.63    2.50
   5   4   3   73.80    2.50
  -5   4  -3   71.55    2.49
   6  -4   3   16.82    1.19
  -6   4  -3   18.23    1.13
   6   4   3   17.92    1.15
   7  -4   3   31.03    1.67
   7   4   3   32.71    1.63
  -7   4  -3   29.87    1.61
   8  -4   3    2.07    0.70
   8   4   3    2.71    0.71
   9  -4   3   11.10    1.24
   9   4   3   16.34    1.33
  10  -4   3    0.94    0.72
  10   4   3    0.18    0.59
  11  -4   3   10.30    1.39
  11   4   3   14.80    1.53
  12  -4   3    8.51    1.41
  12   4   3    9.34    1.33
  13  -4   3    8.60    1.48
  13   4   3   10.39    1.46
  13  -5  -3   18.33    2.01
  13   5  -3   20.22    1.89
  12  -5  -3   -0.56    0.74
  12   5  -3    0.75    0.69
  11  -5  -3   10.39    1.44
  11   5  -3   11.18    1.28
  10  -5  -3    0.65    0.72
  10   5  -3    0.58    0.59
   9  -5  -3   29.29    1.89
   9   5  -3   34.11    1.72
   8  -5  -3    3.49    0.83
   8   5  -3    2.17    0.56
   7  -5  -3   43.07    2.08
   7   5  -3   47.00    1.85
   6  -5  -3    3.03    0.65
  -6  -5   3    2.24    0.47
   6  -5  -3    2.72    0.66
   6   5  -3    1.60    0.44
  -6   5   3    2.49    0.58
  -5  -5   3   25.25    1.10
   5  -5  -3   22.81    1.32
   5  -5  -3   23.63    1.31
  -5   5   3   24.41    1.30
  -5   5   3   24.68    1.34
   5   5  -3   25.59    1.10
   4  -5  -3   31.59    1.43
  -4  -5   3   30.05    1.14
   4  -5  -3   28.84    1.42
  -4   5   3   29.10    1.37
  -4   5   3   29.79    1.44
   4   5  -3   28.76    1.13
   3  -5  -3   13.68    0.95
   3  -5  -3   11.86    0.88
  -3  -5   3   13.36    0.64
   3   5  -3   12.25    0.61
  -3   5   3   12.29    0.87
   2  -5  -3    5.92    0.61
  -2  -5   3    5.64    0.39
   2  -5  -3    6.21    0.65
  -2  -5   3    7.41    0.43
  -2   5   3    6.07    0.66
  -2   5   3    5.20    0.57
   2   5  -3    6.72    0.41
  -1  -5   3   23.46    0.82
  -1  -5   3   24.00    0.79
   1  -5  -3   23.50    1.11
  -1   5   3   23.44    1.07
   1   5  -3   23.92    0.80
  -1   5   3   22.77    1.09
   0  -5   3   16.44    0.68
   0  -5  -3   15.84    0.88
   0  -5   3   17.21    0.68
   0   5  -3   16.30    0.66
   0   5  -3   16.68    0.67
   0   5   3   15.42    0.87
   0   5   3   15.98    0.89
  -1  -5  -3   51.21    1.81
  -1  -5  -3   50.45    1.81
   1  -5   3   53.02    1.67
   1  -5   3   52.33    1.66
  -1   5  -3   53.01    1.64
   1   5   3   54.11    1.84
  -2  -5  -3   11.37    0.79
  -2  -5  -3   11.45    0.78
   2  -5   3   12.27    0.71
   2  -5   3   11.09    0.72
  -2   5  -3   11.31    0.68
   2   5   3   10.44    0.75
   3  -5   3    1.76    0.41
  -3  -5  -3    1.63    0.43
   3  -5   3    1.66    0.45
  -3   5  -3    2.31    0.43
   3   5   3    1.65    0.42
   4  -5   3    0.25    0.39
  -4  -5  -3    0.69    0.39
   4  -5   3    1.12    0.40
  -4   5  -3    0.90    0.35
   4   5   3    0.85    0.40
   5  -5   3   11.11    1.00
  -5  -5  -3   10.37    0.85
   5   5   3   10.20    0.85
  -5   5  -3   10.04    0.85
   6  -5   3    2.89    0.64
   6   5   3    2.67    0.61
  -6   5  -3    1.77    0.52
   7  -5   3   19.50    1.40
   7   5   3   18.27    1.23
  -7   5  -3   20.77    1.30
   8  -5   3   -0.24    0.51
   8   5   3    0.07    0.49
   9  -5   3   40.38    2.22
   9   5   3   39.76    2.07
  10  -5   3    0.08    0.70
  10   5   3    0.66    0.65
  11  -5   3   57.10    2.84
  11   5   3   51.17    2.60
  12  -5   3    0.42    0.84
  12   5   3    0.98    0.77
  13  -5   3   11.33    1.67
  13   5   3   11.70    1.53
  12  -6  -3   13.57    1.65
  12   6  -3   14.22    1.49
  11  -6  -3    1.33    0.83
  11   6  -3    0.92    0.63
  10  -6  -3    1.44    0.77
  10   6  -3    1.49    0.66
   9  -6  -3   17.36    1.63
   9   6  -3   17.23    1.27
   8  -6  -3    2.88    0.75
   8   6  -3    2.32    0.57
   7  -6  -3    8.48    1.03
   7   6  -3    8.32    0.81
   6  -6  -3   96.72    3.42
  -6  -6   3   98.37    3.07
  -6   6   3   98.72    3.39
   6   6  -3   93.93    3.04
   5  -6  -3  106.79    3.51
  -5  -6   3  104.89    3.14
   5  -6  -3  106.21    3.53
   5   6  -3   97.02    3.09
  -5   6   3  102.05    3.48
  -5   6   3  106.90    3.48
   4  -6  -3  100.39    3.32
   4  -6  -3  100.63    3.32
  -4  -6   3  104.39    2.98
   4   6  -3  101.04    2.95
  -4   6   3   96.41    3.26
  -4   6   3  100.87    3.33
   3  -6  -3  112.50    3.55
  -3  -6   3  117.87    3.21
  -3  -6   3  110.79    3.17
   3  -6  -3  106.68    3.54
   3   6  -3  112.14    3.18
  -3   6   3  117.25    3.60
  -3   6   3  115.18    3.55
  -2  -6   3   36.09    1.17
  -2  -6   3   35.50    1.19
   2  -6  -3   34.75    1.50
  -2   6   3   38.75    1.55
   2   6  -3   37.19    1.19
  -1  -6   3  119.99    3.29
   1  -6  -3  119.65    3.63
  -1  -6   3  121.45    3.33
  -1   6   3  123.44    3.63
   1   6  -3  123.38    3.32
  -1   6   3  112.93    3.62
   0  -6  -3    1.05    0.38
   0  -6  -3    0.49    0.35
   0  -6   3    1.28    0.27
   0  -6   3    0.86    0.27
   0   6   3    0.44    0.35
   0   6   3    1.09    0.38
   0   6  -3    1.27    0.26
   0   6  -3    1.30    0.28
   1  -6   3   95.97    2.82
  -1  -6  -3   92.98    2.98
  -1  -6  -3   90.41    2.99
   1  -6   3   97.93    2.83
  -1   6  -3   98.73    2.81
   1   6   3  101.64    3.04
   1   6   3   96.45    3.05
   2  -6   3   47.59    1.69
  -2  -6  -3   51.60    1.83
  -2  -6  -3   42.75    1.74
   2  -6   3   47.88    1.68
   2   6   3   50.41    1.81
  -2   6  -3   50.03    1.67
  -3  -6  -3   46.59    1.75
   3  -6   3   42.56    1.66
  -3  -6  -3   46.19    1.73
   3  -6   3   41.62    1.66
   3   6   3   41.77    1.68
  -3   6  -3   43.89    1.64
   4  -6   3    2.28    0.50
   4  -6   3    1.56    0.46
  -4  -6  -3    1.55    0.45
  -4   6  -3    1.99    0.43
   4   6   3    1.58    0.45
   5  -6   3   45.92    1.94
   5  -6   3   46.08    2.07
  -5  -6  -3   47.96    1.92
  -5   6  -3   44.23    1.87
   5   6   3   45.92    1.88
   6  -6   3   22.55    1.38
   6   6   3   23.85    1.34
  -6   6  -3   22.91    1.33
   7  -6   3   31.34    1.75
  -7   6  -3   33.18    1.71
   7   6   3   32.64    1.67
   8  -6   3   22.22    1.65
   8   6   3   23.65    1.52
   9  -6   3   13.29    1.43
   9   6   3   12.91    1.35
  10  -6   3   10.20    1.40
  10   6   3   11.14    1.25
  11  -6   3   14.50    1.66
  11   6   3   13.62    1.47
  12  -6   3    2.32    0.96
  12   6   3    3.99    0.93
  12  -7  -3   14.76    1.76
  12   7  -3   13.30    1.43
  11  -7  -3    5.92    1.16
  11   7  -3    4.70    0.93
  10  -7  -3   11.99    1.48
  10   7  -3    9.77    1.11
   9  -7  -3    0.12    0.68
   9   7  -3    0.05    0.49
   8  -7  -3   18.52    1.56
   8   7  -3   15.68    1.13
   7  -7  -3    0.50    0.62
   7   7  -3   -0.12    0.37
   6  -7  -3   35.51    1.87
   6   7  -3   34.31    1.46
  -6   7   3   35.78    1.76
   5  -7  -3    0.28    0.50
  -5  -7   3    0.19    0.29
  -5   7   3    0.16    0.36
  -5   7   3   -0.33    0.40
   5   7  -3    0.44    0.31
  -4  -7   3    2.71    0.39
   4  -7  -3    1.96    0.52
   4  -7  -3    2.78    0.62
  -4   7   3    2.06    0.50
  -4   7   3    2.96    0.59
   4   7  -3    1.69    0.35
   3  -7  -3    1.26    0.46
  -3  -7   3    1.14    0.30
  -3  -7   3    1.90    0.31
   3  -7  -3    1.02    0.35
   3   7  -3    1.34    0.31
  -3   7   3    1.01    0.45
  -3   7   3    1.74    0.46
  -2  -7   3    2.44    0.33
   2  -7  -3    1.92    0.50
  -2  -7   3    2.28    0.34
  -2   7   3    1.90    0.49
  -2   7   3    0.50    0.30
   2   7  -3    1.84    0.31
   1  -7  -3    1.08    0.41
   1  -7  -3    0.73    0.40
  -1  -7   3    0.89    0.26
  -1  -7   3    0.75    0.25
   1   7  -3    1.02    0.26
  -1   7   3    0.52    0.34
  -1   7   3    0.24    0.35
   0  -7  -3   51.12    1.88
   0  -7   3   50.22    1.62
   0  -7  -3   46.82    1.85
   0  -7   3   49.27    1.63
   0   7  -3   50.65    1.62
   0   7  -3   49.28    1.61
   0   7   3   46.45    1.85
   0   7   3   50.92    1.87
   1  -7   3   49.99    1.69
   1  -7   3   50.83    1.70
  -1  -7  -3   47.99    1.86
  -1  -7  -3   48.46    1.84
  -1   7  -3   49.42    1.68
   1   7   3   48.94    1.86
  -1   7  -3   48.87    1.66
   2  -7   3   15.78    0.90
  -2  -7  -3   16.26    0.99
  -2  -7  -3   15.30    0.95
   2  -7   3   14.68    0.84
   2   7   3   14.25    0.94
  -2   7  -3   15.17    0.82
  -3  -7  -3   -0.34    0.36
   3  -7   3    0.22    0.33
   3  -7   3    0.19    0.36
  -3  -7  -3    0.23    0.40
  -3   7  -3    0.04    0.27
   3   7   3    0.04    0.36
   4  -7   3   19.86    1.17
   4  -7   3   21.28    1.16
  -4  -7  -3   18.37    1.19
  -4  -7  -3   21.77    1.19
  -4   7  -3   15.81    1.00
   4   7   3   20.61    1.18
   5  -7   3    1.40    0.54
   5   7   3    2.32    0.53
  -5   7  -3    2.19    0.50
   6  -7   3   25.08    1.49
   6   7   3   20.86    1.30
  -6   7  -3   22.57    1.35
   7  -7   3    8.38    1.08
   7   7   3    8.39    0.96
  -7   7  -3    7.91    1.01
   8  -7   3   53.05    2.45
   8   7   3   48.28    2.26
   9  -7   3   21.01    1.75
   9   7   3   21.74    1.55
  10  -7   3   25.45    1.96
  10   7   3   25.81    1.79
  11  -7   3   -0.42    0.70
  11   7   3    0.74    0.71
  12  -7   3   27.00    2.13
  12   7   3   24.70    1.93
  12  -8  -3    5.66    1.25
  12   8  -3    7.41    1.11
  11  -8  -3    8.89    1.37
  11   8  -3    8.34    1.13
  10  -8  -3   10.11    1.37
  10   8  -3   11.80    1.22
   9  -8  -3    0.89    0.81
   9   8  -3    1.55    0.57
   8  -8  -3   40.33    2.30
   8   8  -3   43.41    1.88
   7  -8  -3    5.76    0.99
   7   8  -3    5.82    0.74
   6  -8  -3   36.63    1.90
   6   8  -3   32.76    1.44
   5  -8  -3   23.88    1.52
  -5  -8   3   27.64    1.20
  -5   8   3   23.86    1.42
  -5   8   3   27.22    1.54
   5   8  -3   25.22    1.16
  -4  -8   3    6.46    0.57
   4  -8  -3    4.72    0.77
  -4  -8   3    4.67    0.49
  -4   8   3    4.90    0.72
   4   8  -3    5.13    0.53
  -4   8   3    6.25    0.79
   3  -8  -3    9.05    0.91
  -3  -8   3    8.80    0.62
  -3  -8   3    8.49    0.59
  -3   8   3    7.54    0.87
   3   8  -3    9.94    0.63
  -3   8   3    9.24    0.89
  -2  -8   3   68.88    2.09
   2  -8  -3   65.82    2.42
  -2  -8   3   65.35    2.04
   2  -8  -3   67.97    2.45
   2   8  -3   67.40    2.08
  -2   8   3   67.93    2.42
  -2   8   3   65.53    2.44
   1  -8  -3    1.93    0.50
  -1  -8   3    1.49    0.32
  -1  -8   3    1.22    0.30
   1  -8  -3    1.40    0.46
   1   8  -3    1.58    0.32
  -1   8   3    1.67    0.48
   0  -8  -3   89.31    2.95
   0  -8  -3   86.66    2.90
   0  -8   3   88.55    2.67
   0  -8   3   87.09    2.68
   0   8   3   88.55    2.94
   0   8  -3   89.40    2.68
   0   8   3   90.07    2.94
   0   8  -3   87.93    2.66
   1  -8   3    0.99    0.35
   1  -8   3    1.24    0.35
  -1  -8  -3    1.43    0.46
  -1  -8  -3    1.35    0.44
  -1   8  -3    0.92    0.32
  -1   8  -3    1.64    0.37
   1   8   3    1.10    0.43
   2  -8   3   60.62    2.09
  -2  -8  -3   63.83    2.22
   2  -8   3   60.06    2.09
  -2  -8  -3   53.67    2.16
   2   8   3   60.40    2.21
  -2   8  -3   60.50    2.05
  -3  -8  -3    3.18    0.55
   3  -8   3    3.23    0.58
   3  -8   3    3.29    0.54
  -3   8  -3    3.51    0.53
   3   8   3    2.88    0.55
   4  -8   3   54.12    2.16
  -4  -8  -3   55.45    2.15
   4   8   3   58.11    2.17
  -5  -8  -3   11.19    1.06
   5  -8   3    9.47    1.01
   5   8   3   11.37    1.00
  -5   8  -3   11.16    0.94
   6  -8   3   47.39    2.12
   6   8   3   40.25    1.93
  -6   8  -3   40.61    1.91
   7  -8   3   10.01    1.19
   7   8   3   10.43    1.08
  -7   8  -3   11.32    1.17
   8  -8   3   69.18    2.86
   8   8   3   55.58    2.55
   9  -8   3    3.88    1.00
   9   8   3    5.90    0.97
  10  -8   3   13.48    1.54
  10   8   3   13.43    1.44
  11  -8   3   -0.12    0.74
  11   8   3    0.17    0.68
  11  -9  -3   20.74    2.11
  11   9  -3   23.43    1.61
  10  -9  -3    1.99    0.94
  10   9  -3    2.30    0.71
   9  -9  -3   10.86    1.40
   9   9  -3    9.90    1.06
   8  -9  -3    7.12    1.14
   8   9  -3    6.25    0.80
   7  -9  -3   21.82    1.69
   7   9  -3   24.59    1.31
   6  -9  -3    0.92    0.65
  -6  -9   3    0.44    0.52
   6   9  -3    0.70    0.40
  -5  -9   3   13.44    0.87
   5  -9  -3   13.44    1.30
  -5   9   3   12.73    1.12
  -5   9   3   11.60    1.22
   5   9  -3   13.05    0.85
  -4  -9   3    0.64    0.32
   4  -9  -3    0.47    0.55
  -4  -9   3   -0.02    0.28
  -4   9   3    0.87    0.48
  -4   9   3   -0.09    0.43
   4   9  -3    0.44    0.31
   3  -9  -3    1.31    0.54
  -3  -9   3    0.21    0.31
  -3  -9   3    0.95    0.32
  -3   9   3    1.09    0.50
   3   9  -3    1.20    0.34
  -3   9   3    0.65    0.49
  -2  -9   3    0.58    0.30
   2  -9  -3    0.89    0.50
  -2  -9   3    1.11    0.32
   2   9  -3    0.90    0.31
  -2   9   3    0.70    0.42
  -2   9   3    0.85    0.47
  -1  -9   3    6.96    0.61
   1  -9  -3    6.51    0.77
  -1  -9   3    6.83    0.58
   1   9  -3    6.99    0.59
  -1   9   3    6.38    0.80
  -1   9   3    5.80    0.72
   0  -9   3   37.38    1.44
   0  -9  -3   38.15    1.67
   0  -9   3   38.24    1.45
   0   9   3   39.65    1.72
   0   9  -3   37.57    1.43
   0   9  -3   37.51    1.44
  -1  -9  -3   -0.15    0.39
   1  -9   3    0.29    0.34
   1  -9   3   -0.19    0.28
  -1   9  -3   -0.25    0.27
   1   9   3    0.13    0.35
  -1   9  -3    0.23    0.28
   2  -9   3    5.30    0.64
  -2  -9  -3    3.54    0.63
   2  -9   3    3.86    0.56
   2   9   3    3.75    0.62
  -2   9  -3    4.92    0.61
  -3  -9  -3    2.00    0.55
   3  -9   3    2.58    0.56
  -3   9  -3    3.08    0.52
   3   9   3    2.92    0.61
  -4  -9  -3   21.04    1.27
   4  -9   3   21.86    1.33
   4   9   3   20.21    1.29
   5  -9   3    5.65    0.86
  -5  -9  -3    6.19    0.85
   5   9   3    6.47    0.83
  -5   9  -3    7.64    0.87
  -6  -9  -3    3.72    0.82
   6  -9   3    4.16    0.82
   6   9   3    5.19    0.82
  -6   9  -3    5.54    0.84
   7  -9   3   29.00    1.80
  -7   9  -3   28.02    1.67
   7   9   3   25.25    1.58
   8  -9   3   10.93    1.32
   8   9   3   11.81    1.25
   9  -9   3    2.34    0.87
   9   9   3    2.73    0.79
  10  -9   3   31.84    2.19
  10   9   3   28.79    1.90
  11  -9   3    0.85    0.89
  11   9   3    0.02    0.71
  10 -10  -3    0.32    0.81
  10  10  -3    1.16    0.61
   9 -10  -3   40.41    2.48
   9  10  -3   45.22    2.03
   8 -10  -3    2.12    0.82
   8  10  -3    2.28    0.61
   7 -10  -3    9.62    1.25
   7  10  -3   11.74    0.97
   6 -10  -3    1.47    0.71
  -6 -10   3    0.05    0.39
   6  10  -3    0.34    0.40
   5 -10  -3    9.44    1.18
  -5 -10   3    6.93    0.69
   5  10  -3    7.96    0.75
  -5  10   3    9.14    1.13
  -5  10   3    8.58    1.07
  -4 -10   3    0.92    0.38
   4 -10  -3    1.87    0.68
  -4  10   3    1.84    0.58
  -4  10   3    2.08    0.61
   4  10  -3    1.57    0.41
   3 -10  -3   21.97    1.45
  -3 -10   3   23.44    1.09
  -3 -10   3   24.47    1.08
  -3  10   3   22.27    1.42
  -3  10   3   23.13    1.39
   3  10  -3   24.01    1.08
  -2 -10   3    2.07    0.40
   2 -10  -3    3.30    0.70
  -2 -10   3    3.25    0.47
  -2  10   3    2.06    0.57
  -2  10   3    2.42    0.60
   2  10  -3    1.97    0.41
  -1 -10   3   68.55    2.27
   1 -10  -3   71.84    2.63
  -1 -10   3   69.25    2.31
  -1  10   3   68.69    2.63
  -1  10   3   69.45    2.59
   1  10  -3   72.48    2.30
   0 -10   3    0.13    0.33
   0 -10  -3    0.38    0.47
   0 -10   3    0.37    0.32
   0  10  -3    0.32    0.31
   0  10  -3    0.31    0.32
   0  10   3    0.46    0.43
   0  10   3   -0.13    0.39
  -1 -10  -3   98.27    3.28
   1 -10   3   96.97    3.08
  -1  10  -3   98.52    3.08
  -1  10  -3   92.80    3.03
   1  10   3   96.02    3.28
  -2 -10  -3    0.41    0.47
   2 -10   3    0.48    0.41
   2  10   3    0.43    0.44
  -2  10  -3    0.49    0.34
   3 -10   3   39.11    1.75
  -3 -10  -3   40.17    1.79
   3  10   3   36.73    1.76
  -3  10  -3   38.94    1.66
   4 -10   3    2.76    0.66
  -4 -10  -3    3.34    0.64
   4  10   3    3.27    0.68
  -5 -10  -3   59.11    2.35
   5 -10   3   54.65    2.38
   5  10   3   53.32    2.30
  -5  10  -3   56.80    2.29
  -6 -10  -3   -0.12    0.53
   6 -10   3    0.50    0.61
   6  10   3   -0.06    0.50
  -6  10  -3    0.27    0.47
   7 -10   3   34.76    1.95
  -7 -10  -3   29.55    1.80
   7  10   3   31.61    1.80
   8 -10   3    4.90    1.00
   8  10   3    6.22    1.00
   9 -10   3   35.71    2.27
   9  10   3   41.66    2.20
  10 -10   3   -1.22    0.75
  10  10   3    0.94    0.73
  10 -11  -3    5.61    1.25
  10  11  -3    6.82    0.96
   9 -11  -3   10.78    1.51
   9  11  -3   10.66    1.09
   8 -11  -3    2.16    0.93
   8  11  -3    1.67    0.57
   7 -11  -3    6.09    1.10
   7  11  -3    5.33    0.74
   6 -11  -3   -0.53    0.61
   6  11  -3    0.19    0.39
   5 -11  -3    2.73    0.83
  -5 -11   3    3.68    0.55
   5  11  -3    4.76    0.62
  -5  11   3    3.56    0.82
   4 -11  -3   12.31    1.24
  -4 -11   3   15.93    0.93
  -4  11   3   14.28    1.27
   4  11  -3   13.81    0.92
  -4  11   3   14.04    1.34
  -3 -11   3   -0.40    0.30
   3 -11  -3   -0.02    0.55
  -3  11   3   -0.33    0.44
   3  11  -3    0.00    0.31
  -3  11   3   -0.39    0.41
  -2 -11   3    9.27    0.74
   2 -11  -3    9.45    1.02
  -2  11   3    7.46    0.94
  -2  11   3   10.78    1.08
   2  11  -3    8.06    0.73
   1 -11  -3   28.70    1.61
  -1 -11   3   30.01    1.29
  -1  11   3   27.52    1.59
   1  11  -3   30.75    1.31
  -1  11   3   27.29    1.52
   0 -11   3    1.17    0.43
   0 -11  -3    0.34    0.53
   0  11  -3    1.50    0.43
   0  11   3    1.05    0.54
   0  11   3    1.70    0.57
   0  11  -3    1.25    0.42
  -1 -11  -3   -0.47    0.46
   1 -11   3    0.01    0.38
   1  11   3   -0.03    0.42
  -1  11  -3    0.04    0.32
  -1  11  -3    0.15    0.34
  -2 -11  -3   -0.66    0.44
   2 -11   3    0.11    0.41
  -2  11  -3    0.27    0.33
   2  11   3   -0.09    0.43
  -3 -11  -3   34.77    1.70
   3 -11   3   33.56    1.64
   3  11   3   27.73    1.58
  -3  11  -3   31.38    1.51
   4 -11   3    4.73    0.81
  -4 -11  -3    4.67    0.78
  -4  11  -3    5.12    0.73
   4  11   3    5.68    0.87
   5 -11   3    0.65    0.58
  -5 -11  -3    1.08    0.59
   5  11   3    1.24    0.59
  -6 -11  -3    9.82    1.11
   6 -11   3   10.81    1.21
   6  11   3   10.19    1.12
   7 -11   3   11.45    1.33
  -7 -11  -3   11.27    1.25
   7  11   3   12.82    1.28
   8 -11   3   -0.19    0.65
   8  11   3    0.12    0.59
   9 -11   3    3.48    1.02
   9  11   3    3.04    0.86
  10 -11   3    1.88    1.03
  10  11   3    1.63    0.80
   9 -12  -3   -0.36    0.75
   9  12  -3    1.29    0.58
   8 -12  -3    9.92    1.41
   8  12  -3    8.56    0.94
   7 -12  -3    0.23    0.70
   7  12  -3   -0.02    0.43
   6 -12  -3   19.68    1.74
   6  12  -3   23.60    1.27
   5 -12  -3    0.85    0.72
   5  12  -3    1.87    0.49
  -5  12   3    1.71    0.75
   4 -12  -3    9.70    1.18
  -4  12   3   10.57    1.24
  -4  12   3    8.47    1.09
   4  12  -3    9.22    0.79
   3 -12  -3   -0.10    0.58
  -3 -12   3    0.49    0.36
  -3  12   3    0.06    0.49
  -3  12   3   -0.63    0.43
   3  12  -3   -0.49    0.29
   2 -12  -3   44.99    2.16
  -2 -12   3   45.99    1.75
  -2  12   3   47.36    2.13
  -2  12   3   45.27    2.16
   2  12  -3   44.98    1.75
  -1 -12   3    8.18    0.77
   1 -12  -3    9.56    1.06
  -1  12   3    9.51    1.06
   1  12  -3   10.27    0.82
  -1  12   3    8.63    1.02
   0 -12   3   27.16    1.38
   0 -12  -3   31.50    1.68
   0  12  -3   29.47    1.39
   0  12  -3   30.47    1.39
   0  12   3   25.75    1.58
   0  12   3   29.30    1.64
  -1 -12  -3    1.30    0.60
   1 -12   3    1.63    0.54
   1  12   3    1.58    0.58
  -1  12  -3    1.50    0.42
  -1  12  -3    0.27    0.36
  -2 -12  -3   31.50    1.71
   2 -12   3   30.19    1.56
   2  12   3   31.14    1.68
   3 -12   3   -0.52    0.43
  -3 -12  -3    0.18    0.56
   3  12   3    0.23    0.49
   4 -12   3   22.17    1.54
  -4 -12  -3   24.46    1.55
   4  12   3   25.85    1.57
   5 -12   3    0.26    0.62
  -5 -12  -3    0.23    0.59
   5  12   3    0.52    0.55
   6 -12   3   20.66    1.62
   6  12   3   22.94    1.59
   7 -12   3    0.93    0.75
   7  12   3   -0.18    0.57
   8 -12   3   26.01    1.98
   8  12   3   27.60    1.82
   9  12   3    5.48    1.04
   8 -13  -3   19.13    1.93
   8  13  -3   16.66    1.27
   7 -13  -3   -0.01    0.75
   7  13  -3    0.30    0.46
   6 -13  -3    3.63    1.00
   6  13  -3    3.85    0.64
   5 -13  -3    1.01    0.79
  -5  13   3    0.60    0.59
   5  13  -3    0.40    0.41
   4 -13  -3   10.07    1.26
  -4  13   3    8.91    1.18
   4  13  -3    9.11    0.84
   3 -13  -3    1.35    0.71
   3  13  -3    0.67    0.40
  -3  13   3    0.65    0.60
   2 -13  -3    2.64    0.81
   2  13  -3    2.68    0.51
  -2  13   3    1.78    0.68
   1 -13  -3    0.50    0.60
  -1  13   3   -0.58    0.44
   1  13  -3    0.27    0.38
   0 -13  -3   17.96    1.37
   0  13  -3   16.29    1.07
   0  13   3   15.37    1.32
  -1 -13  -3   -0.94    0.48
   1  13   3   -0.71    0.47
  -1  13  -3    0.00    0.38
  -2 -13  -3    6.69    0.95
   2  13   3    7.32    0.98
  -3 -13  -3    0.10    0.57
   3  13   3    0.31    0.55
   4  13   3    5.57    0.93
   5  13   3    0.84    0.62
   6  13   3   12.70    1.32
   7  13   3    5.14    0.97
   8  13   3    5.40    1.03
   7  14  -3   17.25    1.22
   6 -14  -3    4.90    1.15
   6  14  -3    5.12    0.72
   5 -14  -3    6.02    1.15
  -5  14   3    7.36    1.19
   5  14  -3    7.52    0.80
   4 -14  -3    1.64    0.83
  -4  14   3    1.93    0.72
   3 -14  -3   31.46    2.04
   3  14  -3   33.13    1.50
  -3  14   3   30.74    1.92
   2 -14  -3   14.64    1.43
  -2  14   3   16.42    1.43
   2  14  -3   15.85    1.06
   1 -14  -3    6.75    1.02
  -1  14   3    9.05    1.11
   1  14  -3   10.63    0.91
   0 -14  -3    3.78    0.90
   0  14  -3    3.81    0.67
   0  14   3    4.20    0.84
   1  14   3   13.35    1.31
   2  14   3   -0.37    0.49
   3  14   3   34.26    1.90
   4  14   3    6.02    0.97
   5  14   3   21.01    1.58
   6  14   3    5.87    0.99
   5  15  -3    6.33    0.76
  -4  15   3    0.56    0.62
   4  15  -3   -0.37    0.35
   3  15  -3   -0.64    0.33
  -3  15   3    0.47    0.62
   2  15  -3    0.08    0.38
  -2  15   3   -0.17    0.50
   1  15  -3    0.74    0.44
  -1  15   3    0.86    0.62
   0  15   3    1.33    0.64
   0  15  -3    0.93    0.44
   1  15   3   -0.10    0.55
   2  15   3   -0.61    0.49
   3  15   3    2.27    0.74
   4  15   3    0.67    0.63
   5  15   3    2.30    0.78
   2  16  -3    4.19    0.67
  -2  16   3    4.06    0.91
   1  16  -3    9.82    0.98
  -1  16   3   11.91    1.37
   0  16   3    6.62    1.04
   1  16   3    0.04    0.59
   2  16   3   11.09    1.29
  13   0  -4    0.12    0.75
  12   0  -4    1.35    0.84
  11   0  -4    0.60    0.66
  10   0  -4    1.84    0.70
   9   0  -4    0.09    0.46
   9   0  -4    0.44    0.55
   8   0  -4   20.41    1.33
   8   0  -4   19.37    1.24
  -7   0   4   -0.48    0.22
   7   0  -4   -0.01    0.32
   7   0  -4    0.00    0.40
  -6   0   4   12.58    0.83
   6   0  -4   10.40    0.89
   5   0  -4    0.00    0.30
   5   0  -4   -0.14    0.34
  -5   0   4   -0.19    0.29
   4   0  -4   34.56    1.33
   4   0  -4   33.82    1.32
  -4   0   4   33.25    1.31
   3   0  -4   -0.25    0.25
   3   0  -4   -0.20    0.26
  -3   0   4   -0.09    0.27
  -3   0   4   -0.08    0.26
  -2   0   4   82.66    2.40
   2   0  -4   83.11    2.40
  -2   0   4   84.13    2.39
   2   0  -4   83.50    2.40
   1   0  -4   -0.38    0.20
   1   0  -4   -0.17    0.21
  -1   0   4   -0.28    0.21
  -1   0   4   -0.25    0.19
   0   0  -4   68.12    1.98
   0   0   4   66.58    1.98
   0   0  -4   72.76    2.00
  -1   0  -4    0.03    0.23
   1   0   4    0.09    0.24
   2   0   4    2.66    0.42
  -2   0  -4    4.11    0.46
  -3   0  -4    0.03    0.29
   3   0   4    0.18    0.34
   5   0   4   -0.40    0.35
  -5   0  -4    0.69    0.37
  -6   0  -4  242.60    6.97
   6   0   4  241.37    6.98
   7   0   4    0.56    0.52
  -7   0  -4    0.40    0.44
   8   0   4  153.83    4.96
   9   0   4   -0.10    0.56
  10   0   4   45.82    2.38
  11   0   4   -0.57    0.62
  12   0   4   11.66    1.54
  13   0   4    0.86    0.84
  13  -1  -4    4.83    1.11
  13   1  -4    5.00    1.06
  12  -1  -4   14.41    1.59
  12   1  -4   19.24    1.66
  11  -1  -4   22.09    1.72
  11   1  -4   21.39    1.67
  10  -1  -4   28.85    1.81
  10   1  -4   28.16    1.74
  10   1  -4   32.90    1.81
   9  -1  -4   18.45    1.38
   9  -1  -4   18.52    1.34
   9   1  -4   18.18    1.28
   9   1  -4   17.79    1.36
   8  -1  -4   23.79    1.41
   8  -1  -4   24.19    1.49
   8   1  -4   25.62    1.39
   8   1  -4   24.00    1.40
   7  -1  -4    1.28    0.54
   7  -1  -4    2.73    0.56
  -7  -1   4    2.71    0.53
  -7   1   4    1.73    0.42
   7   1  -4    2.54    0.55
   7   1  -4    1.46    0.43
   6  -1  -4  111.72    3.72
   6  -1  -4  120.22    3.75
  -6  -1   4  121.11    3.68
   6   1  -4  122.35    3.69
   6   1  -4  117.44    3.65
  -6   1   4  121.21    3.73
   5  -1  -4   69.09    2.35
  -5  -1   4   67.46    2.27
   5   1  -4   68.82    2.28
   5   1  -4   69.12    2.27
   4  -1  -4  152.63    4.45
  -4  -1   4  158.16    4.38
   4  -1  -4  155.12    4.46
   4   1  -4  154.80    4.36
   4   1  -4  155.83    4.38
   3  -1  -4   88.06    2.70
   3  -1  -4   87.16    2.70
  -3  -1   4   92.87    2.62
   3   1  -4   92.19    2.61
  -3   1   4   92.40    2.72
   3   1  -4   88.92    2.61
  -2  -1   4  115.79    3.20
   2  -1  -4  117.30    3.33
  -2  -1   4  117.78    3.21
   2  -1  -4  117.74    3.34
  -2   1   4  123.88    3.35
   2   1  -4  117.31    3.21
   2   1  -4  115.32    3.21
   1  -1  -4   47.24    1.51
  -1  -1   4   48.12    1.37
   1  -1  -4   49.56    1.53
  -1  -1   4   49.49    1.38
   1   1  -4   45.50    1.37
   1   1  -4   48.81    1.37
  -1   1   4   47.44    1.52
   0  -1  -4    1.50    0.31
   0  -1   4    1.59    0.23
   0  -1  -4    2.24    0.32
   0   1   4    2.02    0.30
   0   1   4    2.26    0.33
   0   1  -4    1.63    0.23
  -1  -1  -4   22.30    0.89
   1  -1   4   20.82    0.82
  -1   1  -4   20.25    0.81
   1   1   4   22.34    0.89
  -2  -1  -4   76.11    2.28
   2  -1   4   73.24    2.24
  -2   1  -4   71.76    2.24
   2   1   4   74.47    2.27
  -3  -1  -4   15.04    0.83
   3  -1   4   15.68    0.89
   3   1   4   15.58    0.86
  -3   1  -4   16.65    0.86
   4  -1   4   80.36    2.64
   4   1   4   83.75    2.68
  -5  -1  -4   89.75    2.89
   5  -1   4   83.39    2.86
   5   1   4   81.51    2.84
  -5   1  -4   89.08    2.88
   6  -1   4   26.00    1.41
  -6  -1  -4   27.41    1.38
  -6   1  -4   24.20    1.33
   6   1   4   29.35    1.46
  -7  -1  -4   24.48    1.41
   7  -1   4   23.49    1.41
   7   1   4   23.69    1.42
  -7   1  -4   25.19    1.44
   8  -1   4    5.60    0.86
   8   1   4    6.93    0.94
   9  -1   4    1.42    0.69
   9   1   4    1.32    0.62
  10  -1   4    1.97    0.79
  10   1   4    3.14    0.85
  11  -1   4   -0.48    0.62
  11   1   4    0.14    0.63
  12  -1   4    1.12    0.81
  12   1   4    0.96    0.77
  13  -1   4    2.05    0.95
  13   1   4    0.69    0.81
  13  -2  -4   13.33    1.68
  13   2  -4   11.41    1.45
  12  -2  -4    1.77    0.89
  12   2  -4    1.95    0.78
  11  -2  -4    7.92    1.19
  11   2  -4    8.16    1.13
  10  -2  -4   29.21    1.88
  10   2  -4   31.46    1.74
  10   2  -4   25.29    1.67
   9  -2  -4   12.14    1.25
   9   2  -4   11.49    1.17
   9   2  -4   14.87    1.17
   8  -2  -4    2.95    0.72
   8  -2  -4    3.65    0.74
   8   2  -4    3.30    0.63
   7  -2  -4   -0.57    0.42
  -7  -2   4    0.53    0.41
   7  -2  -4    0.09    0.39
   7   2  -4    0.11    0.39
   6  -2  -4    0.79    0.45
  -6  -2   4    0.94    0.41
   6  -2  -4    0.18    0.39
  -6   2   4    1.24    0.44
   6   2  -4    0.64    0.37
  -5  -2   4    2.53    0.44
   5  -2  -4    2.09    0.51
   5  -2  -4    1.29    0.42
  -5   2   4    2.87    0.51
   5   2  -4    1.99    0.42
   4  -2  -4    2.55    0.46
  -4  -2   4    3.46    0.43
   4  -2  -4    2.42    0.47
  -4   2   4    3.15    0.46
  -4   2   4    2.36    0.47
   4   2  -4    3.42    0.42
   3  -2  -4    0.50    0.32
   3  -2  -4   -0.25    0.30
  -3  -2   4   -0.05    0.22
  -3   2   4    0.17    0.31
  -3   2   4    0.11    0.23
   3   2  -4    0.11    0.21
   3   2  -4   -0.11    0.22
   2  -2  -4   31.35    1.22
  -2  -2   4   33.97    1.01
   2  -2  -4   33.20    1.26
   2   2  -4   33.35    1.01
  -2   2   4   32.96    1.23
  -2   2   4   31.64    1.24
   2   2  -4   32.84    1.00
   1  -2  -4   58.90    1.90
  -1  -2   4   61.25    1.62
  -1  -2   4   61.58    1.61
   1  -2  -4   59.49    1.91
  -1   2   4   62.03    1.92
   0  -2  -4    7.87    0.60
   0  -2  -4    8.05    0.59
   0  -2   4    7.36    0.37
   0   2  -4    7.94    0.38
   0   2   4    7.99    0.62
   0   2   4    7.75    0.62
   1  -2   4   96.17    2.78
  -1  -2  -4   99.68    2.91
  -1  -2  -4  101.84    2.91
   1   2   4  102.21    2.92
  -1   2  -4   99.11    2.77
  -2  -2  -4  238.96    6.40
   2  -2   4  228.37    6.33
   2   2   4  235.98    6.40
  -2   2  -4  236.63    6.33
   3  -2   4   70.29    2.29
   3   2   4   73.01    2.33
  -3   2  -4   71.10    2.29
   4  -2   4    3.02    0.53
  -4  -2  -4    3.56    0.53
   4   2   4    2.99    0.49
  -4   2  -4    2.95    0.48
   5  -2   4  112.71    3.66
  -5  -2  -4  120.89    3.69
  -5   2  -4  119.16    3.67
   5   2   4  114.37    3.67
  -6  -2  -4    7.64    0.86
   6  -2   4    6.29    0.81
  -6   2  -4    5.47    0.73
   6   2   4    6.38    0.77
   7  -2   4   93.38    3.34
   7   2   4   94.46    3.32
  -7   2  -4   97.35    3.35
   8  -2   4    0.02    0.51
   8   2   4    0.84    0.53
   9  -2   4   19.31    1.48
   9   2   4   16.61    1.41
  10  -2   4    1.52    0.75
  10   2   4    1.70    0.74
  11  -2   4   60.02    2.92
  11   2   4   57.19    2.79
  12  -2   4    2.23    0.94
  12   2   4    1.78    0.88
  13  -2   4   43.75    2.69
  13   2   4   44.76    2.67
  13  -3  -4   22.38    1.96
  13   3  -4   16.58    1.70
  12  -3  -4    5.51    1.17
  12   3  -4    5.34    1.01
  11  -3  -4   75.16    3.28
  11   3  -4   73.14    3.05
  10  -3  -4    5.23    0.95
  10   3  -4    5.43    0.91
   9  -3  -4   12.41    1.31
   9   3  -4   10.60    1.06
   8  -3  -4   35.00    1.98
   8  -3  -4   36.31    1.85
   8   3  -4   33.84    1.63
  -7  -3   4  138.44    4.21
   7  -3  -4  135.52    4.35
   7  -3  -4  130.21    4.35
   7   3  -4  134.75    4.15
   6  -3  -4    5.19    0.71
  -6  -3   4    4.82    0.61
   6  -3  -4    4.68    0.67
   6   3  -4    4.35    0.56
  -6   3   4    7.02    0.78
  -5  -3   4   56.53    1.87
   5  -3  -4   55.41    2.07
   5  -3  -4   49.12    2.04
   5   3  -4   53.67    1.87
  -5   3   4   58.71    2.09
   4  -3  -4    1.40    0.43
  -4  -3   4    1.95    0.36
   4  -3  -4    2.11    0.46
   4   3  -4    2.05    0.35
  -4   3   4    2.08    0.44
  -4   3   4    1.56    0.47
   3  -3  -4   95.46    2.96
  -3  -3   4   94.65    2.67
  -3   3   4   96.20    2.97
   3   3  -4   96.38    2.67
  -2  -3   4    3.01    0.26
   2  -3  -4    2.86    0.42
   2  -3  -4    2.96    0.43
   2   3  -4    4.14    0.26
   2   3  -4    3.10    0.24
  -2   3   4    3.52    0.47
  -2   3   4    3.88    0.46
   1  -3  -4  217.64    6.01
   1  -3  -4  212.10    6.01
  -1   3   4  223.21    6.02
  -1   3   4  225.49    6.02
   0  -3  -4   21.23    0.93
   0  -3   4   18.08    0.64
   0  -3  -4   18.74    0.92
   0   3  -4   17.57    0.62
   0   3   4   21.97    0.96
   0   3   4   20.51    0.92
   1  -3   4  256.20    6.87
  -1  -3  -4  267.50    7.06
  -1  -3  -4  251.75    7.03
  -1   3  -4  265.31    6.87
   1   3   4  262.27    7.04
   2  -3   4   74.98    2.30
  -2   3  -4   76.11    2.29
   2   3   4   75.64    2.38
   3  -3   4   47.34    1.75
  -3   3  -4   52.89    1.77
   3   3   4   51.65    1.81
  -4  -3  -4   60.14    2.12
   4  -3   4   58.07    2.10
   4   3   4   61.53    2.14
  -4   3  -4   59.68    2.08
   5  -3   4   16.27    1.12
  -5  -3  -4   17.75    1.04
   5   3   4   18.80    1.09
  -5   3  -4   18.65    1.07
   6  -3   4    7.11    0.81
  -6  -3  -4    8.45    0.87
  -6   3  -4    8.85    0.88
   6   3   4    8.33    0.84
   7  -3   4   10.15    1.02
   7   3   4   14.61    1.13
  -7   3  -4   13.30    1.09
   8  -3   4   -0.51    0.46
   8   3   4   -0.16    0.48
   9  -3   4   19.33    1.52
   9   3   4   16.97    1.40
  10  -3   4    0.49    0.68
  10   3   4    0.25    0.60
  11  -3   4    2.98    0.91
  11   3   4    3.50    0.90
  12  -3   4   -0.45    0.76
  12   3   4    0.20    0.73
  13  -3   4    0.33    0.85
  13   3   4    0.91    0.80
  13  -4  -4    2.08    1.00
  13   4  -4    2.35    0.90
  12  -4  -4    0.79    0.85
  12   4  -4    2.03    0.75
  11  -4  -4    0.09    0.73
  11   4  -4   -0.21    0.62
  10  -4  -4    4.59    0.98
  10   4  -4    3.38    0.74
   9  -4  -4    1.43    0.71
   9   4  -4    1.13    0.53
   8  -4  -4    3.94    0.81
   8   4  -4    3.35    0.63
   7  -4  -4    0.80    0.52
   7  -4  -4    1.24    0.62
   7   4  -4    1.51    0.47
   6  -4  -4    2.30    0.61
   6  -4  -4    2.59    0.56
  -6  -4   4    1.94    0.43
  -6   4   4    2.04    0.52
   6   4  -4    2.10    0.45
   5  -4  -4   24.65    1.31
  -5  -4   4   24.83    1.07
   5  -4  -4   23.88    1.31
  -5   4   4   23.94    1.32
  -5   4   4   23.98    1.28
   5   4  -4   24.32    1.07
  -4  -4   4   17.26    0.81
   4  -4  -4   17.21    1.10
   4  -4  -4   18.80    1.10
  -4   4   4   17.69    1.06
  -4   4   4   19.52    1.06
   4   4  -4   18.67    0.82
   3  -4  -4    2.11    0.43
  -3  -4   4    3.12    0.31
   3  -4  -4    2.36    0.48
   3   4  -4    2.57    0.29
  -3   4   4    1.62    0.45
  -3   4   4    0.73    0.32
   2  -4  -4    2.75    0.48
  -2   4   4    3.28    0.48
  -2   4   4    2.81    0.47
   1  -4  -4    8.48    0.68
  -1   4   4    8.62    0.68
  -1   4   4    8.06    0.63
   0  -4   4   48.33    1.42
   0  -4   4   48.50    1.42
   0   4   4   49.28    1.71
   0   4   4   53.05    1.77
   0   4  -4   49.30    1.40
   1  -4   4   28.65    1.02
  -1  -4  -4   29.55    1.23
   1  -4   4   28.40    1.03
  -1   4  -4   30.28    1.02
   1   4   4   29.72    1.21
   2  -4   4   36.98    1.37
  -2  -4  -4   41.35    1.51
   2   4   4   37.45    1.45
  -2   4  -4   37.09    1.35
   3  -4   4   76.03    2.42
  -3   4  -4   78.22    2.41
   3   4   4   70.21    2.44
   4  -4   4  114.93    3.61
  -4   4  -4  118.31    3.59
   4   4   4  118.46    3.63
  -5  -4  -4    1.01    0.32
   5  -4   4    0.08    0.40
   5   4   4    0.37    0.39
  -5   4  -4    0.47    0.36
   6  -4   4   30.85    1.53
  -6  -4  -4   26.46    1.37
   6   4   4   26.88    1.45
  -6   4  -4   29.17    1.45
   7  -4   4    1.87    0.64
   7   4   4    0.77    0.50
  -7   4  -4    2.39    0.60
   8  -4   4   35.33    1.91
   8   4   4   35.26    1.84
   9  -4   4   10.85    1.27
   9   4   4   10.20    1.17
  10  -4   4    7.31    1.18
  10   4   4    5.03    0.96
  11  -4   4   17.49    1.83
  11   4   4   20.01    1.62
  12  -4   4   24.33    2.04
  12   4   4   29.72    2.08
  13  -4   4   10.35    1.57
  13   4   4   12.82    1.62
  13  -5  -4   -0.91    0.81
  13   5  -4    0.15    0.67
  12  -5  -4   17.16    1.84
  12   5  -4   11.16    1.36
  11  -5  -4    0.19    0.64
  11   5  -4    0.04    0.56
  10  -5  -4   27.95    2.00
  10   5  -4   31.26    1.74
   9  -5  -4    3.81    0.90
   9   5  -4    4.43    0.76
   8  -5  -4   76.72    3.05
   8   5  -4   73.58    2.68
   7  -5  -4    0.26    0.51
   7   5  -4   -0.04    0.36
   6  -5  -4  112.60    3.75
  -6  -5   4  109.93    3.37
   6  -5  -4  108.27    3.68
   6   5  -4  107.93    3.35
  -6   5   4  111.81    3.69
  -5  -5   4    2.12    0.41
   5  -5  -4    1.72    0.53
   5  -5  -4    2.35    0.58
  -5   5   4    3.02    0.60
  -5   5   4    2.09    0.55
   5   5  -4    1.51    0.36
  -4  -5   4  156.69    4.32
   4  -5  -4  164.84    4.75
   4  -5  -4  153.85    4.72
  -4   5   4  162.28    4.71
   4   5  -4  154.35    4.30
  -4   5   4  145.29    4.68
   3  -5  -4   76.25    2.57
   3  -5  -4   75.53    2.56
  -3  -5   4   75.68    2.15
   3   5  -4   72.92    2.13
  -3   5   4   73.60    2.56
  -3   5   4   78.81    2.56
  -2  -5   4  119.72    3.04
   2  -5  -4  114.79    3.49
   2  -5  -4  106.06    3.45
  -2  -5   4  114.77    3.02
  -2   5   4  109.41    3.48
   2   5  -4  115.22    3.03
   1  -5  -4   17.95    0.98
   1  -5  -4   14.74    0.89
  -1  -5   4   17.37    0.57
  -1  -5   4   17.44    0.59
  -1   5   4   16.73    0.97
   1   5  -4   17.56    0.57
  -1   5   4   16.88    0.93
   0  -5   4  118.32    3.31
   0  -5  -4  121.38    3.65
   0  -5   4  127.32    3.33
   0   5  -4  123.06    3.30
   0   5   4  121.57    3.66
   0   5   4  122.30    3.64
   1  -5   4    0.34    0.23
   1  -5   4    0.33    0.26
  -1  -5  -4   -0.02    0.08
  -1  -5  -4    0.72    0.38
   1   5   4    0.40    0.36
  -1   5  -4    0.74    0.24
  -2  -5  -4  146.11    4.24
   2  -5   4  144.07    4.10
   2  -5   4  143.58    4.11
   2   5   4  144.51    4.24
  -2   5  -4  145.67    4.09
  -3  -5  -4    0.71    0.31
   3  -5   4    1.20    0.39
   3  -5   4    1.94    0.44
  -3   5  -4    1.82    0.40
   3   5   4    1.52    0.43
   4  -5   4   29.73    1.40
   4  -5   4   31.30    1.39
  -4  -5  -4   28.54    1.32
   4   5   4   31.63    1.43
  -4   5  -4   30.71    1.35
  -5  -5  -4    6.66    0.73
   5  -5   4    6.04    0.76
   5  -5   4    5.45    0.68
  -5   5  -4    6.78    0.74
   5   5   4    7.52    0.82
   6  -5   4    3.68    0.69
   6   5   4    3.05    0.62
  -6   5  -4    3.90    0.65
   7  -5   4    0.34    0.52
   7   5   4    0.51    0.50
  -7   5  -4    0.38    0.43
   8  -5   4   11.33    1.25
   8   5   4    9.81    1.08
   9  -5   4    0.29    0.59
   9   5   4    0.32    0.55
  10  -5   4    8.27    1.20
  10   5   4    9.27    1.20
  11  -5   4    4.10    1.07
  11   5   4    3.35    0.90
  12  -5   4    0.27    0.79
  12   5   4   -0.61    0.67
  12  -6  -4    1.41    0.94
  12   6  -4    0.63    0.67
  11  -6  -4   -0.11    0.72
  11   6  -4    0.21    0.57
  10  -6  -4    5.78    1.08
  10   6  -4    3.59    0.76
   9  -6  -4   28.36    1.87
   9   6  -4   24.29    1.43
   8  -6  -4    0.66    0.67
   8   6  -4   -0.25    0.40
   7  -6  -4    1.21    0.61
   7   6  -4    0.12    0.37
  -6  -6   4    4.13    0.55
   6  -6  -4    3.18    0.73
   6   6  -4    4.18    0.54
  -6   6   4    3.25    0.66
   5  -6  -4    1.43    0.52
   5  -6  -4    1.77    0.58
  -5  -6   4    1.90    0.37
  -5   6   4    0.52    0.44
  -5   6   4    1.98    0.54
   5   6  -4    1.37    0.36
  -4  -6   4    7.64    0.54
   4  -6  -4    8.47    0.92
   4  -6  -4    7.66    0.83
   4   6  -4    7.03    0.53
  -4   6   4    7.56    0.84
  -4   6   4    7.63    0.80
  -3  -6   4    0.24    0.20
   3  -6  -4    0.24    0.39
   3  -6  -4   -0.24    0.37
  -3  -6   4   -0.06    0.20
  -3   6   4   -0.04    0.34
   3   6  -4   -0.15    0.18
  -3   6   4   -0.48    0.30
  -2  -6   4    1.62    0.23
   2  -6  -4    1.12    0.44
   2  -6  -4    2.00    0.47
  -2  -6   4    1.20    0.22
  -2   6   4    0.32    0.31
   2   6  -4    1.72    0.23
  -2   6   4    1.80    0.46
  -1  -6   4   99.03    2.70
  -1  -6   4   95.63    2.67
   1  -6  -4   97.21    3.10
   1   6  -4   97.84    2.68
  -1   6   4   98.89    3.12
   0  -6  -4    7.24    0.70
   0  -6   4    9.21    0.50
   0  -6   4    7.53    0.49
   0   6   4    6.52    0.68
   0   6   4    7.64    0.71
   0   6  -4    7.75    0.47
  -1  -6  -4    8.50    0.73
   1  -6   4    7.81    0.59
   1  -6   4    9.32    0.58
  -1  -6  -4    8.39    0.75
   1   6   4    8.42    0.74
  -1   6  -4    9.03    0.55
   2  -6   4    8.56    0.69
   2  -6   4    7.89    0.63
  -2  -6  -4    8.20    0.76
  -2  -6  -4    7.47    0.72
  -2   6  -4    7.33    0.58
   2   6   4    7.07    0.71
   3  -6   4   12.34    0.81
  -3  -6  -4   12.60    0.95
  -3  -6  -4    9.93    0.82
   3  -6   4   12.16    0.83
  -3   6  -4   11.11    0.76
   3   6   4   11.30    0.88
  -4  -6  -4   41.06    1.76
   4  -6   4   44.25    1.78
   4  -6   4   45.77    1.80
   4   6   4   42.52    1.79
  -4   6  -4   45.86    1.73
   5  -6   4   17.16    1.16
   5   6   4   19.57    1.19
  -5   6  -4   18.56    1.12
   6  -6   4   56.36    2.29
  -6   6  -4   54.82    2.20
   6   6   4   50.10    2.17
   7  -6   4   11.91    1.20
   7   6   4   11.83    1.15
  -7   6  -4   10.79    1.11
   8  -6   4   25.71    1.71
   8   6   4   22.94    1.54
   9  -6   4   21.01    1.68
   9   6   4   25.73    1.68
  10  -6   4   21.05    1.73
  10   6   4   20.74    1.64
  11  -6   4    6.41    1.18
  11   6   4    9.40    1.28
  12  -6   4   15.23    1.82
  12   6   4   14.90    1.66
  12  -7  -4    3.89    1.07
  12   7  -4    2.99    0.88
  11  -7  -4   32.77    2.25
  11   7  -4   32.73    1.88
  10  -7  -4    0.12    0.74
  10   7  -4   -0.04    0.54
   9  -7  -4   37.18    2.22
   9   7  -4   35.00    1.75
   8  -7  -4   13.21    1.44
   8   7  -4   14.51    1.06
   7  -7  -4   44.18    2.19
   7   7  -4   41.25    1.73
   6  -7  -4    0.30    0.49
  -6  -7   4    0.35    0.33
  -6   7   4   -0.10    0.48
   6   7  -4   -0.04    0.30
  -5  -7   4  113.72    3.25
   5  -7  -4  108.15    3.71
  -5   7   4  103.93    3.68
  -5   7   4  109.49    3.67
   5   7  -4  107.78    3.21
   4  -7  -4    0.62    0.50
  -4  -7   4    0.26    0.26
  -4  -7   4    0.50    0.29
  -4   7   4    0.01    0.35
  -4   7   4    0.10    0.43
   4   7  -4    0.45    0.25
   3  -7  -4   65.12    2.39
  -3  -7   4   62.34    1.90
  -3  -7   4   62.80    1.91
   3  -7  -4   62.75    2.37
   3   7  -4   63.36    1.91
  -3   7   4   64.26    2.41
  -3   7   4   67.76    2.40
   2  -7  -4   19.47    1.13
  -2  -7   4   18.27    0.74
  -2  -7   4   17.98    0.71
  -2   7   4   17.48    1.08
  -2   7   4   20.30    1.18
   2   7  -4   19.84    0.73
   1  -7  -4  239.01    6.79
  -1  -7   4  248.90    6.35
  -1  -7   4  234.07    6.37
   1   7  -4  244.49    6.36
  -1   7   4  230.71    6.80
   0  -7  -4   29.60    1.37
   0  -7   4   28.94    1.06
   0  -7  -4   29.73    1.34
   0  -7   4   27.59    1.05
   0   7  -4   28.65    1.03
   0   7   4   27.91    1.36
   0   7  -4   27.64    1.04
   1  -7   4   65.67    2.08
   1  -7   4   64.23    2.07
  -1  -7  -4   69.98    2.38
  -1  -7  -4   62.61    2.29
  -1   7  -4   65.66    2.04
   1   7   4   66.59    2.35
   2  -7   4    0.28    0.29
  -2  -7  -4    0.16    0.34
  -2  -7  -4    0.57    0.39
   2  -7   4    0.51    0.34
   2   7   4    0.01    0.35
  -2   7  -4    0.13    0.25
   3  -7   4    6.33    0.68
  -3  -7  -4    5.48    0.71
  -3  -7  -4    4.81    0.64
   3  -7   4    5.60    0.62
  -3   7  -4    5.85    0.61
   3   7   4    3.64    0.60
  -4  -7  -4    4.17    0.66
   4  -7   4    5.17    0.70
   4  -7   4    4.84    0.66
   4   7   4    3.97    0.62
  -4   7  -4    4.96    0.63
   5  -7   4   16.77    1.18
   5   7   4   16.34    1.16
  -5   7  -4   17.70    1.11
   6  -7   4    7.94    0.95
  -6   7  -4    6.20    0.82
   6   7   4    5.48    0.81
   7  -7   4   13.15    1.27
   7   7   4   11.07    1.12
  -7   7  -4   10.08    1.10
   8  -7   4    1.61    0.75
   8   7   4    2.05    0.68
   9  -7   4    1.39    0.73
   9   7   4    1.93    0.72
  10  -7   4    0.06    0.72
  10   7   4    0.02    0.62
  11  -7   4   -0.25    0.66
  11   7   4   -0.02    0.64
  12  -7   4   -0.83    0.76
  12   7   4    0.53    0.76
  12  -8  -4   -1.39    0.70
  12   8  -4    0.88    0.72
  11  -8  -4    5.16    1.26
  11   8  -4    5.87    0.96
  10  -8  -4    5.30    1.15
  10   8  -4    5.55    0.86
   9  -8  -4   -0.10    0.70
   9   8  -4    0.52    0.49
   8  -8  -4   21.25    1.70
   8   8  -4   22.18    1.29
   7  -8  -4   -0.29    0.59
   7   8  -4    0.11    0.37
   6  -8  -4    0.50    0.56
  -6   8   4    0.58    0.54
   6   8  -4    0.18    0.35
  -5  -8   4    3.51    0.52
   5  -8  -4    4.69    0.84
  -5  -8   4    5.11    0.53
  -5   8   4    2.80    0.65
  -5   8   4    2.93    0.71
   5   8  -4    3.26    0.46
   4  -8  -4    1.53    0.61
  -4  -8   4    2.72    0.37
  -4  -8   4    2.80    0.40
  -4   8   4    1.72    0.59
   4   8  -4    1.80    0.35
  -4   8   4    2.49    0.61
   3  -8  -4    7.71    0.86
  -3  -8   4    8.00    0.53
  -3  -8   4    9.56    0.55
  -3   8   4    9.51    0.91
  -3   8   4    7.05    0.84
   3   8  -4    7.57    0.52
  -2  -8   4   10.09    0.57
   2  -8  -4    9.72    0.91
  -2  -8   4   10.27    0.55
  -2   8   4    8.81    0.86
  -2   8   4    9.60    0.95
   2   8  -4    9.33    0.55
  -1  -8   4   14.31    0.70
  -1  -8   4   16.38    0.75
   1  -8  -4   15.83    1.05
   1  -8  -4   16.11    1.05
  -1   8   4   16.32    1.03
  -1   8   4   13.56    1.02
   1   8  -4   15.31    0.71
   0  -8  -4    6.16    0.74
   0  -8   4    5.92    0.51
   0  -8  -4    4.32    0.65
   0  -8   4    6.20    0.51
   0   8   4    4.98    0.67
   0   8  -4    5.18    0.49
   0   8  -4    4.94    0.47
  -1  -8  -4   54.47    2.06
   1  -8   4   52.36    1.80
   1  -8   4   54.42    1.81
  -1  -8  -4   52.50    2.07
  -1   8  -4   53.45    1.77
   1   8   4   48.79    2.01
   2  -8   4    3.45    0.50
  -2  -8  -4    2.38    0.56
  -2  -8  -4    2.79    0.58
   2  -8   4    3.07    0.48
   2   8   4    2.63    0.57
  -2   8  -4    2.65    0.42
   3  -8   4   24.86    1.22
  -3  -8  -4   21.93    1.27
   3  -8   4   22.07    1.20
   3   8   4   22.18    1.27
  -3   8  -4   24.78    1.16
   4  -8   4    0.13    0.39
  -4  -8  -4    0.19    0.43
  -4   8  -4    0.55    0.36
   4   8   4    0.12    0.41
  -5  -8  -4   91.20    3.26
   5  -8   4   90.96    3.26
  -5   8  -4  100.00    3.23
   5   8   4   92.73    3.25
   6  -8   4    3.92    0.77
  -6   8  -4    5.41    0.79
   6   8   4    4.29    0.76
   7  -8   4   38.47    2.05
  -7   8  -4   38.64    1.93
   7   8   4   40.87    1.99
   8  -8   4    4.72    1.00
   8   8   4    4.95    0.90
   9  -8   4   20.68    1.69
   9   8   4   19.37    1.54
  10  -8   4   -0.39    0.67
  10   8   4    0.05    0.63
  11  -8   4   17.31    1.84
  11   8   4   19.83    1.72
  11  -9  -4    2.32    0.95
  11   9  -4    3.76    0.79
  10  -9  -4   47.99    2.72
  10   9  -4   46.46    2.14
   9  -9  -4   10.86    1.39
   9   9  -4   11.02    1.07
   8  -9  -4   20.03    1.82
   8   9  -4   19.43    1.23
   7  -9  -4   25.28    1.77
   7   9  -4   26.41    1.31
   6  -9  -4    3.82    0.83
  -6  -9   4    5.19    0.65
  -6   9   4    4.48    0.87
   6   9  -4    4.64    0.58
   5  -9  -4   10.39    1.16
  -5  -9   4   11.12    0.76
  -5  -9   4    9.96    0.73
  -5   9   4    8.74    1.03
   5   9  -4   11.02    0.75
  -5   9   4   10.82    1.15
   4  -9  -4   39.15    1.92
  -4  -9   4   40.28    1.42
  -4  -9   4   38.33    1.41
  -4   9   4   40.12    1.87
  -4   9   4   41.07    1.96
   4   9  -4   39.07    1.42
   3  -9  -4    3.71    0.72
  -3  -9   4    3.32    0.40
  -3  -9   4    2.73    0.39
   3   9  -4    3.23    0.39
  -3   9   4    2.05    0.55
  -3   9   4    1.72    0.57
  -2  -9   4   32.89    1.19
   2  -9  -4   33.30    1.64
  -2  -9   4   31.38    1.16
  -2   9   4   33.24    1.65
   2   9  -4   33.51    1.19
  -2   9   4   29.25    1.53
   1  -9  -4   -0.40    0.39
  -1  -9   4    0.37    0.25
  -1  -9   4    0.64    0.27
  -1   9   4   -0.28    0.33
  -1   9   4    0.28    0.42
   1   9  -4    0.28    0.23
   0  -9   4   68.18    2.22
   0  -9   4   69.80    2.25
   0  -9  -4   70.49    2.57
   0   9   4   70.53    2.59
   0   9   4   70.83    2.57
   0   9  -4   72.58    2.23
   0   9  -4   70.96    2.23
  -1  -9  -4   -0.21    0.37
   1  -9   4   -0.10    0.28
   1  -9   4    0.60    0.32
  -1   9  -4    0.32    0.28
   1   9   4    0.42    0.40
  -2  -9  -4   30.22    1.51
   2  -9   4   29.26    1.33
   2  -9   4   29.88    1.35
  -2   9  -4   31.85    1.31
   2   9   4   29.24    1.50
   3  -9   4   16.30    1.08
  -3  -9  -4   14.92    1.12
   3   9   4   18.31    1.19
  -3   9  -4   16.47    0.98
   4  -9   4   11.77    1.06
  -4  -9  -4   11.79    1.07
   4   9   4   10.92    1.04
  -5  -9  -4   16.85    1.25
   5  -9   4   16.22    1.27
  -5   9  -4   14.39    1.07
   5   9   4   14.46    1.16
   6  -9   4    4.56    0.85
  -6  -9  -4    5.43    0.90
   6   9   4    6.05    0.89
  -6   9  -4    7.59    0.95
   7  -9   4    0.39    0.61
  -7   9  -4   -0.31    0.43
   7   9   4   -0.72    0.48
   8  -9   4    6.35    1.09
   8   9   4    6.58    1.04
   9  -9   4   14.78    1.63
   9   9   4   17.01    1.60
  10  -9   4   -0.40    0.70
  10   9   4    0.73    0.67
  11  -9   4    0.96    0.88
  11   9   4   -0.19    0.64
  10 -10  -4    3.58    1.15
  10  10  -4    4.28    0.82
   9 -10  -4    0.25    0.75
   9  10  -4    0.10    0.49
   8 -10  -4    0.40    0.73
   8  10  -4   -0.24    0.42
   7 -10  -4    2.10    0.84
   7  10  -4    2.13    0.51
  -6 -10   4   -0.17    0.38
   6 -10  -4    0.21    0.61
  -6  10   4    1.30    0.64
   6  10  -4    0.56    0.37
  -5 -10   4    0.78    0.36
   5 -10  -4    1.49    0.69
   5  10  -4    1.50    0.40
  -5  10   4    1.42    0.65
   4 -10  -4    0.49    0.55
  -4 -10   4    0.71    0.35
  -4 -10   4   -0.17    0.28
  -4  10   4   -0.24    0.46
   4  10  -4   -0.12    0.27
  -4  10   4   -0.84    0.44
  -3 -10   4    1.45    0.36
  -3 -10   4    1.66    0.37
   3 -10  -4    1.51    0.62
   3  10  -4    2.55    0.40
  -3  10   4    1.31    0.54
  -3  10   4    2.00    0.63
  -2 -10   4   12.17    0.72
  -2 -10   4   12.64    0.74
   2 -10  -4   14.01    1.21
   2  10  -4   12.59    0.72
  -2  10   4   11.82    1.05
  -2  10   4   10.54    1.06
  -1 -10   4    3.08    0.46
  -1 -10   4    2.84    0.45
   1 -10  -4    2.90    0.64
   1  10  -4    4.02    0.49
  -1  10   4    3.38    0.65
  -1  10   4    3.05    0.67
   0 -10  -4   31.37    1.60
   0 -10   4   33.92    1.33
   0 -10   4   31.29    1.30
   0  10   4   31.27    1.60
   0  10   4   28.52    1.58
   0  10  -4   32.34    1.28
   0  10  -4   31.90    1.29
  -1 -10  -4    7.06    0.86
   1 -10   4    6.09    0.64
  -1  10  -4    6.66    0.65
   1  10   4    6.15    0.81
   2 -10   4   36.77    1.58
  -2 -10  -4   36.07    1.74
  -2  10  -4   37.92    1.53
   2  10   4   34.21    1.71
   3 -10   4    0.88    0.47
  -3 -10  -4    0.42    0.47
   3  10   4   -0.41    0.43
  -3  10  -4   -0.27    0.29
  -4 -10  -4   45.53    2.03
   4 -10   4   48.12    2.05
   4  10   4   44.60    2.05
  -5 -10  -4    0.22    0.56
   5 -10   4    0.65    0.54
   5  10   4   -0.76    0.42
  -5  10  -4    0.74    0.47
   6 -10   4   25.57    1.64
  -6 -10  -4   26.24    1.65
  -6  10  -4   25.77    1.55
   6  10   4   22.93    1.53
  -7 -10  -4    0.37    0.68
   7 -10   4    0.57    0.62
   7  10   4    1.46    0.67
   8 -10   4   41.26    2.31
  -8 -10  -4   38.10    2.37
   8  10   4   42.32    2.17
   9 -10   4    0.63    0.76
   9  10   4    1.85    0.78
  10 -10   4   17.95    1.80
  10  10   4   18.61    1.79
  10 -11  -4    7.91    1.38
  10  11  -4    8.27    1.01
   9 -11  -4   14.04    1.73
   9  11  -4   15.00    1.18
   8 -11  -4   11.86    1.51
   8  11  -4   11.13    0.98
   7 -11  -4    2.69    0.92
   7  11  -4    4.22    0.64
   6 -11  -4   26.85    1.90
   6  11  -4   24.55    1.23
  -6  11   4   24.92    1.77
   5 -11  -4   42.78    2.24
   5  11  -4   44.16    1.65
  -5  11   4   43.57    2.22
  -4 -11   4   25.52    1.13
   4 -11  -4   24.46    1.71
  -4  11   4   27.53    1.66
   4  11  -4   25.73    1.13
  -4  11   4   22.44    1.57
  -3 -11   4    5.97    0.58
   3 -11  -4    5.97    0.95
   3  11  -4    6.48    0.60
  -3  11   4    6.26    0.92
  -3  11   4    6.11    0.89
   2 -11  -4   23.77    1.51
  -2 -11   4   18.67    0.96
  -2  11   4   18.48    1.37
   2  11  -4   22.24    1.01
  -2  11   4   21.48    1.37
  -1 -11   4   30.96    1.29
   1 -11  -4   32.47    1.72
  -1  11   4   29.03    1.63
  -1  11   4   32.18    1.73
   1  11  -4   31.62    1.29
   0 -11   4   23.51    1.16
   0 -11  -4   23.38    1.47
   0  11  -4   24.95    1.17
   0  11   4   25.89    1.50
   0  11  -4   24.78    1.16
   0  11   4   27.12    1.53
   1 -11   4   28.09    1.35
  -1 -11  -4   30.99    1.62
   1  11   4   26.75    1.57
  -1  11  -4   29.33    1.31
  -2 -11  -4   15.68    1.22
   2 -11   4   16.11    1.09
   2  11   4   15.59    1.21
  -2  11  -4   15.59    0.99
   3 -11   4    5.65    0.76
  -3 -11  -4    3.74    0.74
   3  11   4    4.85    0.80
  -3  11  -4    3.55    0.63
  -4 -11  -4   15.73    1.27
   4 -11   4   17.88    1.31
   4  11   4   17.63    1.31
   5 -11   4   18.83    1.46
  -5 -11  -4   22.69    1.49
   5  11   4   21.38    1.47
  -6 -11  -4    3.53    0.84
   6 -11   4    4.06    0.88
   6  11   4    3.80    0.83
   7 -11   4    1.53    0.75
  -7 -11  -4    3.67    0.89
   7  11   4    3.64    0.83
   8 -11   4    0.67    0.76
   8  11   4    0.57    0.65
   9 -11   4    3.52    1.02
   9  11   4    3.85    0.93
   9 -12  -4    2.01    0.99
   9  12  -4    2.36    0.65
   8 -12  -4    0.43    0.82
   8  12  -4    0.35    0.45
   7 -12  -4   -0.06    0.69
   7  12  -4    0.17    0.42
   6 -12  -4    5.02    1.05
  -6  12   4    3.40    0.84
   6  12  -4    4.27    0.61
   5 -12  -4   -0.48    0.61
  -5  12   4   -0.49    0.51
   5  12  -4   -0.07    0.31
   4 -12  -4    3.93    0.93
   4  12  -4    4.94    0.57
  -4  12   4    4.30    0.87
   3 -12  -4    2.41    0.73
  -3  12   4    2.30    0.69
  -3  12   4    2.01    0.66
   3  12  -4    2.79    0.45
   2 -12  -4    4.58    0.86
  -2 -12   4    4.92    0.56
   2  12  -4    5.99    0.61
  -2  12   4    4.31    0.84
  -2  12   4    5.80    0.92
   1 -12  -4    6.21    0.94
  -1 -12   4    6.04    0.64
  -1  12   4    8.00    1.02
   1  12  -4    7.20    0.69
  -1  12   4    7.09    0.98
   0 -12   4   -0.16    0.38
   0 -12  -4   -0.22    0.52
   0  12   4   -0.81    0.42
   0  12   4   -0.23    0.60
   0  12  -4   -0.26    0.29
   0  12  -4   -0.30    0.36
   1 -12   4   13.29    0.98
  -1 -12  -4   12.07    1.15
  -1  12  -4   12.55    0.90
   1  12   4   13.63    1.28
  -2 -12  -4   13.46    1.26
   2 -12   4   14.28    1.09
   2  12   4   13.05    1.25
   3 -12   4    8.20    0.96
  -3 -12  -4    8.94    1.08
   3  12   4    9.55    1.08
  -4 -12  -4   -0.27    0.50
   4 -12   4    0.95    0.59
   4  12   4   -0.05    0.53
   5 -12   4   21.95    1.54
  -5 -12  -4   19.59    1.49
   5  12   4   18.99    1.49
   6 -12   4    0.14    0.66
   6  12   4    1.35    0.66
   7 -12   4   23.60    1.88
   7  12   4   24.01    1.68
   8  12   4   -0.02    0.65
   9  12   4   21.43    1.76
   8 -13  -4   15.16    1.77
   8  13  -4   16.66    1.20
   7 -13  -4   11.57    1.56
   7  13  -4   14.12    1.02
   6 -13  -4   19.50    1.84
   6  13  -4   16.25    1.02
  -6  13   4   14.44    1.61
   5 -13  -4   31.65    2.09
  -5  13   4   29.97    1.99
   5  13  -4   29.76    1.33
   4 -13  -4    1.30    0.80
  -4  13   4    0.96    0.64
   4  13  -4    1.61    0.42
   3 -13  -4   20.91    1.65
  -3  13   4   22.42    1.64
   3  13  -4   22.18    1.09
   2 -13  -4    0.38    0.59
  -2  13   4    0.04    0.51
   2  13  -4   -0.30    0.28
   1 -13  -4   18.07    1.48
  -1  13   4   15.94    1.36
   1  13  -4   18.17    1.02
   0 -13  -4    0.26    0.60
   0  13   4    0.00    0.51
  -1 -13  -4   20.51    1.50
   1  13   4   23.48    1.55
  -2 -13  -4   12.27    1.24
   2  13   4   14.84    1.30
  -3 -13  -4   10.26    1.18
   3  13   4   13.57    1.32
   4  13   4    9.76    1.14
   5  13   4    6.93    1.04
   6  13   4    2.21    0.74
   7  13   4    1.77    0.82
   8  13   4   -0.08    0.64
   7 -14  -4    0.31    0.88
   7  14  -4    0.91    0.45
   6 -14  -4    2.27    0.95
   6  14  -4    3.07    0.53
   5 -14  -4   -0.81    0.74
  -5  14   4   -0.34    0.64
   5  14  -4    0.58    0.36
   4 -14  -4   -0.99    0.68
   4  14  -4   -0.14    0.31
  -4  14   4    0.68    0.65
   3 -14  -4    1.83    0.79
  -3  14   4    1.86    0.75
   3  14  -4    2.49    0.48
   2 -14  -4   13.85    1.44
   2  14  -4   14.77    0.94
  -2  14   4   14.71    1.49
   1 -14  -4    2.54    0.84
  -1  14   4    3.60    0.82
   1  14  -4    3.51    0.59
   0 -14  -4    1.39    0.70
   0  14   4   -0.34    0.51
   1  14   4   10.10    1.19
   2  14   4    7.60    1.03
   3  14   4   18.25    1.47
   4  14   4   26.74    1.78
   5  14   4   13.27    1.40
   6  14   4    2.83    0.84
  -5  15   4    0.83    0.67
   4  15  -4   22.78    1.14
  -4  15   4   21.15    1.80
   3  15  -4   -0.18    0.30
  -3  15   4    0.69    0.60
   2  15  -4   18.38    1.08
  -2  15   4   17.91    1.59
  -1  15   4    2.92    0.77
   0  15   4   17.78    1.52
   1  15   4    0.10    0.63
   2  15   4    6.99    1.09
   3  15   4    0.44    0.64
   4  15   4    4.19    0.91
   5  15   4    0.18    0.66
  -2  16   4    2.97    0.90
  -1  16   4    1.02    0.67
   0  16   4   13.25    1.43
   1  16   4    0.60    0.65
   2  16   4    4.00    0.93
  13   0  -5    6.12    1.23
  12   0  -5   -0.04    0.66
  11   0  -5   82.47    3.37
  10   0  -5    0.49    0.58
  10   0  -5    0.14    0.47
   9   0  -5   27.89    1.65
   9   0  -5   26.96    1.58
   8   0  -5   -0.28    0.41
   8   0  -5   -0.20    0.38
   7   0  -5   23.58    1.31
   7   0  -5   28.41    1.43
  -7   0   5   25.73    1.43
   6   0  -5    0.12    0.29
  -6   0   5    0.40    0.35
   6   0  -5    0.02    0.35
   5   0  -5   21.66    1.08
   5   0  -5   22.42    1.14
  -5   0   5   24.44    1.14
   4   0  -5    0.20    0.29
   4   0  -5   -0.32    0.24
  -4   0   5    0.10    0.28
  -3   0   5    1.54    0.33
   3   0  -5    1.89    0.35
   3   0  -5    1.43    0.34
  -3   0   5    1.71    0.33
   2   0  -5   -0.03    0.23
  -2   0   5    0.14    0.23
   2   0  -5    0.14    0.24
  -2   0   5   -0.28    0.22
  -1   0   5    4.23    0.40
   1   0  -5    3.60    0.38
  -1   0   5    2.59    0.33
   1   0  -5    2.84    0.34
   0   0  -5   -0.27    0.24
   0   0   5   -0.08    0.24
   0   0  -5   -0.16    0.23
  -1   0  -5    3.66    0.42
   1   0   5    3.65    0.42
   2   0   5    0.04    0.29
  -2   0  -5    0.20    0.28
   3   0   5   25.09    1.14
  -3   0  -5   26.43    1.12
   4   0   5   -0.40    0.33
  -4   0  -5   -0.07    0.25
  -5   0  -5   27.74    1.35
   5   0   5   28.59    1.39
  -6   0  -5    0.49    0.41
   6   0   5   -0.25    0.38
   7   0   5    5.14    0.81
  -7   0  -5    6.12    0.80
   8   0   5   -0.29    0.49
   9   0   5    0.91    0.64
  10   0   5   -0.47    0.56
  11   0   5   13.33    1.53
  12   0   5   -1.52    0.59
  13   0   5    3.81    1.08
  13  -1  -5   -0.40    0.71
  13   1  -5    0.77    0.76
  12  -1  -5   -0.39    0.69
  12   1  -5   -0.22    0.63
  11  -1  -5    0.82    0.71
  11   1  -5    1.23    0.73
  10  -1  -5    9.19    1.19
  10   1  -5    9.46    1.13
  10   1  -5   10.29    1.16
   9  -1  -5    5.77    0.87
   9  -1  -5    6.02    0.93
   9   1  -5    8.17    0.95
   9   1  -5    5.96    0.86
   8  -1  -5    0.63    0.51
   8  -1  -5   -0.23    0.41
   8   1  -5   -0.30    0.44
   8   1  -5    0.76    0.44
   7  -1  -5    3.27    0.63
   7  -1  -5    3.70    0.63
  -7  -1   5    3.50    0.60
   7   1  -5    4.54    0.68
  -6  -1   5    0.14    0.34
   6  -1  -5   -0.15    0.39
   6  -1  -5   -0.29    0.31
   6   1  -5    0.16    0.36
   6   1  -5   -0.43    0.26
  -6   1   5    0.03    0.13
   5  -1  -5  192.06    5.57
   5  -1  -5  182.12    5.52
  -5  -1   5  204.22    5.49
   5   1  -5  196.56    5.47
   5   1  -5  195.71    5.48
   4  -1  -5   87.09    2.72
   4  -1  -5   84.82    2.68
  -4  -1   5   85.84    2.60
  -4   1   5   84.68    2.69
   4   1  -5   84.80    2.59
   4   1  -5   86.44    2.61
  -3  -1   5  168.69    4.59
   3  -1  -5  166.76    4.71
   3  -1  -5  171.34    4.71
  -3  -1   5  171.06    4.59
   3   1  -5  167.34    4.59
   3   1  -5  163.90    4.58
  -3   1   5  165.50    4.70
  -2  -1   5  100.18    2.79
   2  -1  -5  100.87    2.93
   2  -1  -5  100.59    2.93
  -2  -1   5  103.20    2.80
  -2   1   5   97.93    2.92
   2   1  -5  101.66    2.80
   2   1  -5  100.55    2.80
   1  -1  -5   17.66    0.81
  -1  -1   5   17.01    0.66
  -1  -1   5   17.67    0.66
   1  -1  -5   17.35    0.80
   1   1  -5   16.56    0.66
  -1   1   5   17.20    0.81
   1   1  -5   17.14    0.66
   0  -1  -5   49.56    1.60
   0  -1  -5   51.29    1.61
   0  -1   5   47.01    1.47
   0   1   5   50.27    1.60
   0   1  -5   48.47    1.47
  -1  -1  -5  165.20    4.56
   1  -1   5  163.88    4.48
  -1   1  -5  167.94    4.49
   1   1   5  162.76    4.56
   2  -1   5   20.97    0.96
  -2  -1  -5   22.35    0.98
  -2   1  -5   21.83    0.96
   2   1   5   22.29    1.00
   3  -1   5  156.97    4.51
  -3  -1  -5  158.30    4.52
   3   1   5  154.58    4.51
  -3   1  -5  160.01    4.50
   4  -1   5    0.44    0.37
  -4  -1  -5    0.50    0.32
   4   1   5   -0.31    0.36
  -4   1  -5    0.14    0.27
   5  -1   5  311.86    8.82
  -5  -1  -5  332.74    8.88
   5   1   5  303.44    8.82
  -5   1  -5  325.59    8.85
   6  -1   5   78.23    2.79
  -6  -1  -5   77.11    2.77
   6   1   5   77.04    2.78
  -6   1  -5   77.79    2.77
   7  -1   5  126.50    4.25
   7   1   5  130.35    4.27
  -7   1  -5  133.88    4.28
   8  -1   5   52.62    2.36
   8   1   5   55.01    2.38
   9  -1   5   14.40    1.43
   9   1   5   13.99    1.36
  10  -1   5   10.57    1.31
  10   1   5    7.07    1.10
  11  -1   5   14.21    1.52
  11   1   5   14.87    1.58
  12  -1   5    9.82    1.48
  12   1   5   12.87    1.55
  13  -1   5    5.66    1.28
  13   1   5    8.06    1.41
  13  -2  -5    1.69    0.92
  13   2  -5   -0.24    0.71
  12  -2  -5   43.73    2.50
  12   2  -5   48.89    2.46
  11  -2  -5   13.40    1.48
  11   2  -5   12.29    1.34
  10  -2  -5   39.53    2.14
  10   2  -5   35.16    1.97
  10   2  -5   40.44    1.98
   9  -2  -5   14.14    1.33
   9   2  -5   12.22    1.09
   9   2  -5   14.23    1.17
   8  -2  -5   91.11    3.26
   8  -2  -5   90.68    3.24
   8   2  -5   86.26    3.08
   8   2  -5   87.69    3.07
   7  -2  -5    6.47    0.82
   7  -2  -5    5.54    0.74
  -7  -2   5    7.17    0.78
   7   2  -5    6.48    0.72
   7   2  -5    6.12    0.72
   6  -2  -5   29.67    1.48
  -6  -2   5   27.59    1.28
   6  -2  -5   29.37    1.41
   6   2  -5   27.72    1.30
  -6   2   5   28.12    1.38
   6   2  -5   28.54    1.27
  -5  -2   5   21.47    1.03
   5  -2  -5   20.17    1.17
   5  -2  -5   23.06    1.16
   5   2  -5   22.25    1.04
  -5   2   5   20.94    1.16
  -5   2   5   20.81    1.13
   5   2  -5   22.33    1.02
  -4  -2   5  101.91    2.95
   4  -2  -5   90.08    3.08
   4  -2  -5  104.21    3.16
   4   2  -5  104.18    2.94
  -4   2   5  100.66    3.14
  -4   2   5  104.25    3.13
   4   2  -5   99.72    2.94
   3  -2  -5    6.39    0.60
   3  -2  -5    6.75    0.61
  -3  -2   5    7.14    0.48
   3   2  -5    6.53    0.48
   3   2  -5    6.78    0.45
  -3   2   5    5.70    0.56
   2  -2  -5  100.14    2.96
  -2  -2   5   98.01    2.68
  -2  -2   5  101.01    2.68
   2  -2  -5  101.26    2.94
  -2   2   5  102.67    2.97
   2   2  -5  100.08    2.68
   2   2  -5  102.21    2.69
  -2   2   5   82.73    2.87
   1  -2  -5   16.91    0.83
   1  -2  -5   15.61    0.82
  -1  -2   5   16.39    0.55
  -1   2   5   17.23    0.85
  -1   2   5   15.97    0.81
   1   2  -5   15.98    0.55
   1   2  -5   15.73    0.54
   0  -2   5   30.35    1.00
   0  -2  -5   34.81    1.26
   0  -2  -5   32.25    1.22
   0   2  -5   31.25    1.00
   0   2   5   34.18    1.26
   0   2   5   32.62    1.25
   1  -2   5    0.48    0.24
  -1  -2  -5    0.67    0.32
  -1   2  -5    0.54    0.25
   1   2   5    0.45    0.30
   2  -2   5  107.32    3.20
  -2  -2  -5  115.21    3.31
   2   2   5  112.85    3.30
  -2   2  -5  109.80    3.20
   3  -2   5   10.75    0.76
  -3   2  -5    9.85    0.70
   3   2   5    9.74    0.76
  -4  -2  -5    0.46    0.37
   4  -2   5    0.69    0.40
  -4   2  -5    0.65    0.33
   4   2   5    0.55    0.42
  -5  -2  -5   18.91    1.15
   5  -2   5   21.97    1.20
  -5   2  -5   20.84    1.16
   5   2   5   20.16    1.17
  -6  -2  -5    7.67    0.88
   6  -2   5    6.01    0.75
  -6   2  -5    6.79    0.81
   6   2   5    7.77    0.87
   7  -2   5   -0.63    0.41
   7   2   5   -0.04    0.43
  -7   2  -5   -0.61    0.35
   8  -2   5    0.33    0.53
   8   2   5   -0.14    0.51
   9  -2   5    0.22    0.57
   9   2   5    0.06    0.60
  10  -2   5   13.75    1.47
  10   2   5   10.46    1.28
  11  -2   5   18.21    1.79
  11   2   5   14.55    1.56
  12  -2   5    5.52    1.23
  12   2   5    5.52    1.17
  13  -2   5    0.07    0.80
  13   2   5    2.59    0.95
  13  -3  -5   -0.26    0.73
  13   3  -5   -0.59    0.66
  12  -3  -5    1.74    0.85
  12   3  -5    2.97    0.84
  11  -3  -5   -0.36    0.68
  11   3  -5    0.26    0.58
  10  -3  -5    6.71    1.12
  10   3  -5    7.43    0.94
  10   3  -5    7.07    0.97
   9  -3  -5    2.24    0.73
   9   3  -5    2.22    0.57
   9   3  -5    3.42    0.69
   8  -3  -5    1.04    0.50
   8  -3  -5    0.01    0.50
   8   3  -5   -0.08    0.26
   8   3  -5    1.86    0.54
   7  -3  -5    0.33    0.47
   7  -3  -5    0.34    0.51
   7   3  -5    1.02    0.44
   6  -3  -5   10.15    0.97
   6  -3  -5   11.26    0.95
  -6  -3   5   12.83    0.84
  -6   3   5   12.45    0.96
   6   3  -5   11.54    0.81
   5  -3  -5   22.93    1.26
  -5  -3   5   22.96    1.05
   5  -3  -5   23.34    1.25
   5   3  -5   24.50    1.07
  -5   3   5   25.33    1.25
  -5   3   5   24.74    1.28
   5   3  -5   23.36    1.04
   4  -3  -5   87.25    2.94
  -4  -3   5   90.67    2.66
   4  -3  -5   94.58    2.96
   4   3  -5   88.37    2.65
   4   3  -5   89.42    2.65
  -4   3   5   91.16    2.96
  -4   3   5   96.96    2.95
   3  -3  -5   -0.13    0.25
   3  -3  -5   -0.19    0.32
  -3  -3   5    0.57    0.21
  -3   3   5   -0.10    0.26
   3   3  -5    0.29    0.20
  -3   3   5    0.07    0.32
   3   3  -5    0.19    0.18
   2  -3  -5  220.02    6.14
  -2  -3   5  224.22    5.75
   2  -3  -5  226.16    6.16
  -2   3   5  216.31    6.15
   1  -3  -5  104.91    3.11
  -1   3   5  101.48    3.12
  -1   3   5  105.94    3.11
   0  -3  -5  301.80    7.94
   0  -3  -5  292.91    7.92
   0  -3   5  290.84    7.61
   0   3   5  292.82    7.93
   0   3   5  294.18    7.92
   0   3  -5  288.91    7.60
   1  -3   5   59.36    1.81
  -1  -3  -5   59.95    1.99
  -1  -3  -5   60.92    2.01
  -1   3  -5   60.76    1.80
   1   3   5   61.17    2.00
   2  -3   5  483.19   12.64
  -2   3  -5  484.09   12.63
   2   3   5  476.51   12.75
  -3  -3  -5    3.09    0.50
   3  -3   5    2.65    0.46
   3   3   5    1.99    0.47
  -3   3  -5    2.54    0.43
   4  -3   5  188.70    5.61
  -4  -3  -5  195.11    5.66
  -4   3  -5  198.32    5.61
   4   3   5  204.02    5.70
   5  -3   5   20.39    1.20
  -5  -3  -5   20.18    1.17
   5   3   5   17.34    1.12
  -5   3  -5   19.96    1.14
  -6  -3  -5  123.35    4.08
   6  -3   5  126.36    4.10
   6   3   5  132.25    4.12
  -6   3  -5  127.90    4.08
   7  -3   5    2.51    0.63
  -7   3  -5    3.15    0.64
   7   3   5    4.05    0.71
   8  -3   5   70.65    2.87
   8   3   5   69.22    2.82
   9  -3   5    6.88    1.08
   9   3   5    8.35    1.06
  10  -3   5   63.25    2.90
  10   3   5   59.46    2.76
  11  -3   5   13.54    1.59
  11   3   5   13.15    1.46
  12  -3   5   50.19    2.87
  12   3   5   52.73    2.76
  13  -3   5    0.54    0.81
  13   3   5    0.09    0.78
  13  -4  -5   14.51    1.76
  13   4  -5   15.96    1.64
  12  -4  -5   24.03    1.93
  12   4  -5   22.83    1.72
  11  -4  -5   19.42    1.71
  11   4  -5   17.75    1.48
  10  -4  -5   29.93    1.97
  10   4  -5   28.17    1.67
   9  -4  -5  108.00    3.97
   9   4  -5  107.60    3.64
   8  -4  -5   19.73    1.44
   8   4  -5   18.00    1.17
   7  -4  -5   51.77    2.23
   7  -4  -5   51.24    2.17
   7   4  -5   48.94    1.92
   6  -4  -5   31.94    1.57
  -6  -4   5   30.90    1.31
   6  -4  -5   30.14    1.59
   6   4  -5   30.55    1.31
  -6   4   5   33.18    1.58
  -5  -4   5    4.45    0.49
   5  -4  -5    4.47    0.69
   5  -4  -5    3.58    0.62
  -5   4   5    4.71    0.68
  -5   4   5    4.73    0.65
   5   4  -5    3.98    0.47
   4  -4  -5   24.08    1.25
   4  -4  -5   22.06    1.23
  -4  -4   5   23.79    0.94
  -4   4   5   25.76    1.24
   4   4  -5   24.01    0.94
  -4   4   5   26.11    1.30
   3  -4  -5   29.54    1.38
   3  -4  -5   31.35    1.38
  -3  -4   5   32.41    1.01
   3   4  -5   32.03    1.01
  -3   4   5   32.60    1.41
   3   4  -5   30.78    0.99
  -3   4   5   32.80    1.38
   2  -4  -5    1.03    0.39
   2  -4  -5    0.81    0.36
  -2   4   5    0.99    0.39
  -2   4   5    0.53    0.26
  -1   4   5   71.01    2.33
  -1   4   5   68.90    2.28
   0  -4  -5  143.57    4.16
   0  -4   5  140.17    3.78
   0  -4   5  141.12    3.79
   0   4   5  144.88    4.18
   0   4   5  143.07    4.16
   0   4  -5  145.02    3.77
  -1  -4  -5   19.23    1.00
   1  -4   5   18.18    0.77
   1   4   5   16.72    0.94
  -1   4  -5   17.33    0.73
   2  -4   5    2.33    0.41
  -2  -4  -5    1.95    0.48
  -2  -4  -5    2.05    0.45
   2   4   5    1.84    0.43
  -2   4  -5    2.49    0.37
  -3  -4  -5   75.62    2.59
   3  -4   5   75.69    2.49
  -3   4  -5   80.62    2.50
   3   4   5   80.96    2.61
   4  -4   5    4.79    0.64
  -4  -4  -5    3.04    0.53
  -4   4  -5    3.62    0.52
   4   4   5    3.40    0.60
  -5  -4  -5    6.94    0.76
   5  -4   5    6.12    0.76
  -5   4  -5    7.26    0.76
   5   4   5    6.33    0.76
   6  -4   5    6.06    0.81
  -6   4  -5    6.00    0.76
   6   4   5    4.05    0.71
   7  -4   5   -0.07    0.48
  -7   4  -5    0.32    0.43
   7   4   5    0.31    0.47
   8  -4   5   -0.10    0.52
   8   4   5    0.64    0.56
   9  -4   5    4.36    0.90
   9   4   5    3.61    0.83
  10  -4   5   11.94    1.42
  10   4   5   13.30    1.44
  11  -4   5    3.63    0.99
  11   4   5    2.35    0.90
  12  -4   5    0.79    0.82
  12   4   5    0.29    0.68
  13  -4   5    5.09    1.29
  13   4   5    4.48    1.10
  13  -5  -5    1.50    0.96
  13   5  -5    2.57    0.88
  12  -5  -5    1.35    0.81
  12   5  -5   -0.02    0.64
  11  -5  -5   -0.43    0.61
  11   5  -5    1.17    0.65
  10  -5  -5   11.90    1.43
  10   5  -5   10.93    1.16
   9  -5  -5    8.25    1.14
   9   5  -5    7.04    0.89
   8  -5  -5   10.15    1.17
   8   5  -5    9.55    0.89
   7  -5  -5   17.30    1.34
   7   5  -5   19.02    1.08
  -6  -5   5    1.83    0.41
   6  -5  -5    0.54    0.51
   6  -5  -5    0.93    0.50
  -6   5   5    1.65    0.57
  -6   5   5    1.18    0.49
   6   5  -5    1.32    0.39
  -5  -5   5   32.65    1.26
   5  -5  -5   33.36    1.64
   5  -5  -5   34.40    1.67
  -5   5   5   34.31    1.63
   5   5  -5   33.43    1.27
  -5   5   5   32.06    1.56
   4  -5  -5   16.18    1.12
  -4  -5   5   19.29    0.78
   4  -5  -5   18.34    1.13
  -4   5   5   18.30    1.16
  -4   5   5   20.13    1.12
   4   5  -5   17.49    0.76
   3  -5  -5    5.76    0.69
  -3  -5   5    5.17    0.35
   3  -5  -5    5.39    0.69
  -3   5   5    5.78    0.70
  -3   5   5    5.23    0.63
   3   5  -5    5.75    0.35
   2  -5  -5    3.03    0.53
   2  -5  -5    2.78    0.53
  -2   5   5    2.01    0.47
  -2   5   5    3.66    0.55
   1  -5  -5   46.79    1.76
   1  -5  -5   47.68    1.78
  -1   5   5   44.06    1.74
   0  -5   5   21.00    0.74
   0  -5  -5   21.92    1.09
   0  -5   5   19.29    0.73
   0  -5  -5   20.27    1.07
   0   5  -5   21.55    0.71
   0   5   5   21.73    1.08
   0   5   5   21.94    1.11
   1  -5   5  257.75    6.74
  -1  -5  -5  236.09    6.97
  -1  -5  -5  258.93    7.05
   1  -5   5  249.04    6.73
  -1   5  -5  254.81    6.71
   1   5   5  258.10    7.04
  -2  -5  -5    0.94    0.42
   2  -5   5    0.16    0.32
  -2  -5  -5    0.50    0.35
   2  -5   5   -0.25    0.28
  -2   5  -5    0.22    0.26
   2   5   5    0.80    0.38
  -3  -5  -5  104.81    3.30
   3  -5   5  100.61    3.19
  -3   5  -5  107.01    3.18
   3   5   5  105.56    3.32
   4  -5   5    4.99    0.65
  -4  -5  -5    3.00    0.49
   4   5   5    4.84    0.66
  -4   5  -5    4.47    0.58
   5  -5   5   71.98    2.60
  -5   5  -5   73.48    2.57
   5   5   5   71.92    2.62
   6  -5   5    0.50    0.46
  -6   5  -5    0.51    0.41
   6   5   5    0.78    0.45
   7  -5   5   32.90    1.78
   7   5   5   33.47    1.75
  -7   5  -5   31.26    1.69
   8  -5   5    1.00    0.62
   8   5   5    1.42    0.59
   9  -5   5   87.21    3.50
   9   5   5   88.05    3.41
  10  -5   5    2.92    0.92
  10   5   5    2.47    0.81
  11  -5   5   23.67    1.98
  11   5   5   25.05    1.85
  12  -5   5    0.78    0.87
  12   5   5   -0.05    0.74
  12  -6  -5   -0.86    0.65
  12   6  -5    0.10    0.62
  11  -6  -5   16.94    1.76
  11   6  -5   17.06    1.39
  10  -6  -5    9.62    1.31
  10   6  -5    8.20    0.99
   9  -6  -5   47.51    2.44
   9   6  -5   47.04    2.03
   8  -6  -5   24.41    1.68
   8   6  -5   23.49    1.30
   7  -6  -5   48.25    2.24
   7   6  -5   46.25    1.81
  -6  -6   5    9.21    0.72
   6  -6  -5    9.51    1.03
  -6   6   5   10.76    1.11
   6   6  -5    9.59    0.73
   5  -6  -5   31.10    1.57
  -5  -6   5   30.49    1.17
   5  -6  -5   30.52    1.60
  -5   6   5   28.37    1.55
  -5   6   5   31.16    1.55
   5   6  -5   28.33    1.15
   4  -6  -5    6.41    0.80
   4  -6  -5    6.87    0.81
  -4  -6   5    6.82    0.49
  -4   6   5    6.76    0.85
   4   6  -5    6.69    0.48
  -4   6   5    8.40    0.85
  -3  -6   5   62.48    1.72
  -3  -6   5   58.76    1.70
   3  -6  -5   56.64    2.22
   3  -6  -5   59.46    2.26
  -3   6   5   62.43    2.26
   3   6  -5   59.59    1.70
  -3   6   5   59.44    2.26
   2  -6  -5   33.27    1.52
   2  -6  -5   33.24    1.52
  -2   6   5   32.84    1.53
  -2   6   5   35.65    1.51
   1  -6  -5   53.31    2.02
   1  -6  -5   57.39    2.07
  -1  -6   5   57.27    1.54
  -1   6   5   58.91    2.09
  -1   6   5   45.87    1.93
   0  -6   5   14.33    0.65
   0  -6   5   17.02    0.66
   0  -6  -5   17.21    1.00
   0   6  -5   15.63    0.62
   0   6   5   13.97    0.94
  -1  -6  -5   22.36    1.20
   1  -6   5   22.55    0.91
   1  -6   5   23.20    0.94
   1   6   5   21.77    1.16
  -1   6  -5   21.80    0.88
   2  -6   5   -0.03    0.26
  -2  -6  -5    0.24    0.38
  -2  -6  -5   -0.07    0.10
   2  -6   5   -0.43    0.26
   2   6   5    0.26    0.38
  -2   6  -5    0.06    0.24
  -3  -6  -5   44.45    1.81
   3  -6   5   43.35    1.65
   3  -6   5   41.02    1.64
   3   6   5   43.07    1.77
  -3   6  -5   42.01    1.59
  -4  -6  -5   10.83    0.82
   4  -6   5   11.77    0.93
   4  -6   5   13.14    0.95
  -4   6  -5   13.19    0.86
   4   6   5   13.03    1.00
   5  -6   5    9.01    0.95
  -5   6  -5    9.62    0.84
   5   6   5    8.37    0.90
   6  -6   5   -0.64    0.41
   6   6   5    0.67    0.47
  -6   6  -5    0.79    0.43
   7  -6   5    5.07    0.87
  -7   6  -5    6.38    0.87
   7   6   5    5.71    0.88
   8  -6   5    0.35    0.58
   8   6   5    0.34    0.53
   9  -6   5    1.12    0.72
   9   6   5    2.17    0.82
  10  -6   5    0.44    0.68
  10   6   5    0.64    0.70
  11  -6   5    4.76    1.08
  11   6   5    3.00    0.92
  12  -6   5    0.98    0.87
  12   6   5   -0.12    0.76
  12  -7  -5    0.98    0.81
  12   7  -5   -0.51    0.56
  11  -7  -5   -0.66    0.71
  11   7  -5   -0.12    0.53
  10  -7  -5    1.23    0.79
  10   7  -5    0.18    0.53
   9  -7  -5    1.50    0.81
   9   7  -5    1.17    0.52
   8  -7  -5   25.72    1.81
   8   7  -5   21.65    1.24
   7  -7  -5    6.72    1.02
   7   7  -5    6.35    0.69
   6  -7  -5   19.87    1.47
  -6  -7   5   18.19    0.97
   6   7  -5   18.62    0.97
  -6   7   5   18.81    1.37
  -5  -7   5    0.80    0.30
   5  -7  -5    1.15    0.57
  -5   7   5    1.44    0.50
  -5   7   5    1.13    0.51
   5   7  -5    1.35    0.33
   4  -7  -5   12.71    1.09
  -4  -7   5   14.90    0.68
  -4  -7   5   14.45    0.67
  -4   7   5   14.32    1.13
   4   7  -5   14.92    0.68
  -4   7   5   14.98    1.10
   3  -7  -5   -0.16    0.38
   3  -7  -5   -0.05    0.41
  -3  -7   5    0.00    0.18
  -3  -7   5    0.07    0.17
  -3   7   5    0.08    0.36
  -3   7   5   -0.27    0.37
   3   7  -5    0.30    0.17
   2  -7  -5   26.99    1.41
   2  -7  -5   27.92    1.41
  -2   7   5   30.98    1.45
  -2   7   5   29.16    1.46
   1  -7  -5    9.05    0.84
   1  -7  -5    7.97    0.80
  -1  -7   5    8.65    0.44
  -1  -7   5    8.49    0.46
  -1   7   5    7.54    0.79
  -1   7   5    8.79    0.86
   0  -7  -5   56.03    2.11
   0  -7   5   56.21    1.72
   0  -7   5   57.54    1.74
   0   7  -5   56.69    1.71
   0   7   5   58.57    2.15
   0   7   5   53.84    2.11
  -1  -7  -5    6.66    0.72
   1  -7   5   10.32    0.64
   1  -7   5    9.32    0.60
  -1  -7  -5    8.46    0.80
   1   7   5    7.68    0.78
  -1   7  -5    9.27    0.56
   2  -7   5   31.31    1.30
  -2  -7  -5   31.37    1.47
  -2  -7  -5   33.46    1.52
   2  -7   5   33.48    1.33
   2   7   5   33.82    1.54
  -2   7  -5   34.04    1.28
   3  -7   5    1.28    0.41
  -3  -7  -5    0.69    0.43
   3  -7   5    1.15    0.38
  -3  -7  -5    1.10    0.48
  -3   7  -5    0.80    0.33
   3   7   5    1.14    0.44
  -4  -7  -5   34.93    1.66
   4  -7   5   33.64    1.58
   4   7   5   34.17    1.61
  -4   7  -5   36.31    1.53
   5  -7   5   20.48    1.27
   5   7   5   17.84    1.25
  -5   7  -5   20.20    1.18
   6  -7   5   37.62    1.86
   6   7   5   38.85    1.88
  -6   7  -5   38.56    1.78
   7  -7   5    0.19    0.60
  -7   7  -5    0.83    0.52
   7   7   5    1.55    0.67
   8  -7   5   32.01    1.89
   8   7   5   30.19    1.81
   9  -7   5    6.74    1.11
   9   7   5    7.14    1.09
  10  -7   5   26.13    1.96
  10   7   5   23.31    1.75
  11  -7   5    3.86    1.04
  11   7   5    7.56    1.21
  12  -7   5   14.81    1.82
  12   7   5   15.95    1.78
  11  -8  -5    1.11    0.92
  11   8  -5    3.96    0.83
  10  -8  -5   28.95    2.12
  10   8  -5   30.98    1.68
   9  -8  -5    1.61    0.82
   9   8  -5    0.20    0.49
   8  -8  -5   54.59    2.69
   8   8  -5   55.74    2.13
   7  -8  -5   -0.13    0.63
   7   8  -5    1.46    0.44
   6  -8  -5   19.32    1.53
  -6  -8   5   19.71    1.04
   6   8  -5   20.13    1.00
  -6   8   5   18.84    1.42
  -5  -8   5    0.26    0.31
  -5  -8   5    0.25    0.28
   5  -8  -5    0.53    0.53
  -5   8   5    0.60    0.48
  -5   8   5    0.19    0.48
   5   8  -5    0.00    0.26
   4  -8  -5   15.21    1.21
  -4  -8   5   15.99    0.71
  -4  -8   5   16.58    0.73
  -4   8   5   13.83    1.14
  -4   8   5   15.12    1.17
   4   8  -5   15.51    0.71
  -3  -8   5   54.19    1.58
  -3  -8   5   51.81    1.56
   3  -8  -5   48.99    2.15
   3   8  -5   52.29    1.56
  -3   8   5   49.49    2.15
  -3   8   5   53.59    2.16
  -2  -8   5   23.49    0.80
  -2  -8   5   20.18    0.76
   2  -8  -5   20.28    1.29
   2   8  -5   20.82    0.76
  -2   8   5   20.76    1.27
  -2   8   5   22.06    1.24
  -1  -8   5   15.43    0.68
   1  -8  -5   15.02    1.07
  -1  -8   5   15.75    0.69
  -1   8   5   15.18    1.10
  -1   8   5   15.66    1.06
   0  -8  -5    0.31    0.36
   0  -8   5    0.06    0.23
   0  -8   5   -0.03    0.20
   0  -8  -5    0.33    0.41
   0   8   5   -0.02    0.37
   0   8  -5    0.11    0.21
   0   8   5    0.12    0.39
  -1  -8  -5    0.48    0.43
   1  -8   5    0.50    0.27
   1  -8   5    0.52    0.30
  -1   8  -5    0.53    0.25
   1   8   5    0.13    0.38
  -2  -8  -5   13.50    1.05
   2  -8   5   14.04    0.82
   2  -8   5   13.65    0.86
  -2   8  -5   12.14    0.76
   2   8   5   13.04    1.02
   3  -8   5    0.77    0.37
  -3  -8  -5    1.64    0.54
   3  -8   5    0.35    0.41
   3   8   5    0.99    0.49
  -3   8  -5    1.71    0.41
  -4  -8  -5    0.16    0.48
   4  -8   5    2.19    0.55
  -4   8  -5    1.30    0.42
   4   8   5    1.77    0.57
  -5  -8  -5    3.71    0.78
   5  -8   5    4.11    0.72
  -5   8  -5    3.18    0.59
   5   8   5    2.97    0.67
   6  -8   5    1.71    0.63
  -6   8  -5    1.30    0.52
   6   8   5    0.94    0.55
   7  -8   5    0.45    0.58
  -7   8  -5   -0.17    0.44
   7   8   5    0.07    0.56
   8  -8   5   20.74    1.61
   8   8   5   20.70    1.54
   9  -8   5    0.17    0.70
   9   8   5    1.11    0.75
  10  -8   5    3.74    1.01
  10   8   5    5.33    1.05
  11  -8   5    0.94    0.85
  11   8   5   -0.22    0.66
  11  -9  -5    0.34    0.81
  11   9  -5    1.38    0.69
  10  -9  -5    1.36    0.90
  10   9  -5    1.31    0.61
   9  -9  -5   13.87    1.56
   9   9  -5   12.06    1.02
   8  -9  -5   12.43    1.48
   8   9  -5   11.63    0.95
   7  -9  -5    2.04    0.79
   7   9  -5    2.56    0.53
   6  -9  -5    9.04    1.18
  -6  -9   5    7.18    0.67
   6   9  -5    7.86    0.68
  -6   9   5    7.78    1.06
  -5  -9   5   29.73    1.20
   5  -9  -5   29.68    1.76
  -5  -9   5   30.54    1.19
  -5   9   5   29.91    1.73
   5   9  -5   30.80    1.19
  -4  -9   5   11.39    0.63
  -4  -9   5   10.14    0.61
   4  -9  -5   11.67    1.15
  -4   9   5   10.84    1.12
   4   9  -5   10.57    0.60
  -4   9   5   10.77    1.12
   3  -9  -5   22.24    1.41
  -3  -9   5   22.49    0.86
  -3  -9   5   23.65    0.89
   3   9  -5   23.56    0.87
  -3   9   5   21.27    1.35
  -3   9   5   22.63    1.40
   2  -9  -5   24.34    1.45
  -2  -9   5   26.08    0.95
  -2  -9   5   24.51    0.91
  -2   9   5   23.59    1.42
   2   9  -5   26.03    0.92
  -2   9   5   23.93    1.39
   1  -9  -5   17.60    1.23
  -1  -9   5   19.37    0.82
  -1  -9   5   20.02    0.85
  -1   9   5   20.60    1.24
  -1   9   5   18.51    1.25
   1   9  -5   19.35    0.80
   0  -9  -5    0.20    0.44
   0  -9   5    0.51    0.28
   0  -9   5    0.57    0.26
   0   9   5    1.21    0.47
   0   9  -5    0.99    0.28
   1  -9   5   45.87    1.67
   1  -9   5   48.07    1.69
  -1  -9  -5   49.55    2.05
   1   9   5   46.65    2.00
  -1   9  -5   45.63    1.64
   2  -9   5    4.63    0.56
  -2  -9  -5    4.77    0.72
   2  -9   5    6.68    0.67
  -2   9  -5    5.99    0.60
   2   9   5    6.13    0.82
  -3  -9  -5   56.21    2.30
   3  -9   5   61.39    2.19
   3   9   5   54.17    2.30
  -3   9  -5   59.26    2.09
   4  -9   5   19.97    1.25
  -4  -9  -5   21.55    1.39
  -4   9  -5   21.09    1.17
   4   9   5   19.72    1.33
  -5  -9  -5   13.41    1.21
   5  -9   5   14.26    1.16
   5   9   5   11.95    1.15
  -5   9  -5   12.62    1.02
   6  -9   5    8.40    1.01
  -6  -9  -5    8.53    1.06
   6   9   5    8.94    1.08
  -6   9  -5    7.43    0.93
   7  -9   5   40.38    2.17
   7   9   5   44.76    2.18
  -7   9  -5   42.03    2.07
   8  -9   5   16.19    1.53
   8   9   5   14.79    1.44
   9  -9   5    4.78    1.01
   9   9   5    5.04    0.97
  10  -9   5    2.75    0.95
  10   9   5   -0.05    0.62
  11  -9   5   26.28    2.16
  11   9   5   22.38    1.87
  10 -10  -5   -0.46    0.83
  10  10  -5    0.38    0.54
   9 -10  -5   19.26    1.88
   9  10  -5   18.14    1.23
   8 -10  -5    3.64    1.00
   8  10  -5    5.02    0.70
   7 -10  -5   43.74    2.42
   7  10  -5   42.52    1.70
  -6 -10   5    0.36    0.36
   6 -10  -5    0.06    0.64
  -6  10   5   -0.42    0.52
   6  10  -5   -0.24    0.33
  -5 -10   5   31.58    1.26
   5 -10  -5   35.84    2.01
  -5 -10   5   36.43    1.35
   5  10  -5   33.10    1.28
  -5  10   5   31.07    1.88
  -4 -10   5   16.71    0.82
  -4 -10   5   15.39    0.79
   4 -10  -5   17.72    1.45
   4  10  -5   17.22    0.80
  -4  10   5   17.12    1.35
  -4  10   5   16.67    1.32
   3 -10  -5   29.41    1.66
  -3 -10   5   30.10    1.08
  -3 -10   5   27.79    1.04
  -3  10   5   26.64    1.63
   3  10  -5   27.95    1.05
  -3  10   5   29.33    1.61
   2 -10  -5    0.99    0.55
  -2 -10   5   -0.05    0.25
  -2 -10   5    0.45    0.24
  -2  10   5   -0.03    0.46
  -2  10   5    0.46    0.46
   2  10  -5    0.82    0.26
   1 -10  -5   45.97    2.06
  -1 -10   5   44.80    1.54
  -1 -10   5   46.68    1.58
   1  10  -5   45.09    1.53
  -1  10   5   44.17    2.01
  -1  10   5   46.59    2.08
   0 -10   5   16.36    0.85
   0 -10   5   15.54    0.85
   0 -10  -5   14.99    1.19
   0  10  -5   14.97    0.81
   0  10   5   14.00    1.16
   0  10   5   14.72    1.17
   1 -10   5    4.83    0.60
   1 -10   5    4.82    0.57
  -1 -10  -5    4.48    0.74
  -1  10  -5    3.86    0.49
   1  10   5    3.74    0.71
  -2 -10  -5    5.18    0.82
   2 -10   5    4.72    0.62
  -2  10  -5    5.45    0.63
   2  10   5    4.72    0.76
   3 -10   5    8.07    0.84
  -3 -10  -5    8.76    0.97
  -3  10  -5    8.03    0.79
   3  10   5    6.37    0.88
   4 -10   5    1.53    0.55
  -4 -10  -5    1.35    0.57
   4  10   5    0.84    0.58
  -4  10  -5    1.40    0.44
   5 -10   5    3.30    0.72
  -5 -10  -5    2.78    0.76
  -5  10  -5    4.13    0.71
   5  10   5    3.97    0.82
  -6 -10  -5   11.63    1.22
   6 -10   5   15.83    1.34
   6  10   5   12.82    1.27
   7 -10   5    1.65    0.72
  -7 -10  -5    2.50    0.84
   7  10   5    1.08    0.70
  -8 -10  -5   -1.80    0.81
   8 -10   5   -0.69    0.61
   8  10   5   -0.23    0.59
   9 -10   5    1.43    0.85
   9  10   5    1.92    0.79
  10 -10   5   -0.36    0.74
  10  10   5    1.48    0.81
  10 -11  -5    2.51    1.01
  10  11  -5    2.40    0.67
   9 -11  -5    0.33    0.82
   9  11  -5    0.63    0.50
   8 -11  -5    1.23    0.83
   8  11  -5    0.58    0.45
   7 -11  -5    2.25    0.93
   7  11  -5    1.31    0.45
   6 -11  -5   -0.69    0.62
   6  11  -5    0.27    0.34
  -6  11   5    0.67    0.69
   5 -11  -5   36.61    2.07
   5  11  -5   30.60    1.24
  -5  11   5   29.62    1.86
  -4 -11   5   15.57    0.80
   4 -11  -5   17.15    1.51
  -4 -11   5   14.98    0.82
  -4  11   5   13.55    1.39
   4  11  -5   17.37    0.82
   3 -11  -5   21.61    1.54
  -3 -11   5   21.65    0.93
  -3 -11   5   20.09    0.90
  -3  11   5   21.46    1.46
   3  11  -5   20.16    0.89
  -3  11   5   21.43    1.51
  -2 -11   5   20.66    0.94
  -2 -11   5   21.76    0.96
   2 -11  -5   20.47    1.52
  -2  11   5   23.69    1.46
   2  11  -5   22.85    0.94
  -2  11   5   20.80    1.48
  -1 -11   5   11.33    0.75
   1 -11  -5   11.09    1.13
  -1 -11   5   10.90    0.73
  -1  11   5   11.10    1.18
  -1  11   5   10.22    1.11
   0 -11  -5   -0.35    0.48
   0 -11   5   -0.11    0.31
   0  11  -5   -0.37    0.26
   0  11   5   -0.04    0.52
   0  11   5    0.08    0.47
  -1 -11  -5   -0.12    0.51
   1 -11   5   -0.13    0.35
  -1  11  -5    0.20    0.33
   1  11   5    0.69    0.51
   2 -11   5   18.80    1.14
  -2 -11  -5   19.39    1.38
   2  11   5   17.50    1.32
  -2  11  -5   18.15    1.04
  -3 -11  -5    2.90    0.74
   3 -11   5    4.27    0.69
   3  11   5    3.02    0.73
  -3  11  -5    4.21    0.63
   4 -11   5   12.51    1.16
  -4 -11  -5   10.12    1.12
   4  11   5   10.99    1.19
  -5 -11  -5   23.14    1.59
   5 -11   5   22.96    1.53
   5  11   5   23.47    1.61
   6 -11   5   31.52    1.84
  -6 -11  -5   28.83    1.81
   6  11   5   31.21    1.83
   7 -11   5   14.12    1.44
  -7 -11  -5   12.71    1.38
   7  11   5   14.46    1.42
   8 -11   5   14.09    1.53
   8  11   5   14.55    1.49
   9 -11   5   13.07    1.56
   9  11   5   14.56    1.54
   9 -12  -5    0.28    0.92
   9  12  -5   -0.33    0.45
   8 -12  -5   26.73    2.18
   8  12  -5   26.32    1.35
   7 -12  -5    1.32    0.81
   7  12  -5    0.02    0.36
   6 -12  -5   24.63    1.94
  -6  12   5   27.98    1.92
   6  12  -5   25.19    1.17
   5 -12  -5    4.43    1.00
  -5  12   5    6.49    1.08
   5  12  -5    6.39    0.58
   4 -12  -5   12.58    1.36
  -4  12   5   11.04    1.32
   4  12  -5   12.90    0.73
   3 -12  -5    0.63    0.67
   3  12  -5    0.23    0.25
  -3  12   5    0.20    0.54
   2 -12  -5    5.93    0.97
   2  12  -5    6.28    0.55
  -2  12   5    5.24    0.93
  -2  12   5    4.80    0.87
   1 -12  -5   13.66    1.29
  -1 -12   5   16.37    0.92
  -1  12   5   15.77    1.38
  -1  12   5   20.27    1.46
   0 -12  -5   10.80    1.16
   0 -12   5    9.20    0.76
   0  12  -5    7.89    0.74
   0  12   5    9.67    1.14
   0  12   5    8.27    1.11
   1 -12   5    0.97    0.44
  -1 -12  -5    1.66    0.65
   1  12   5    1.00    0.60
  -2 -12  -5    3.80    0.81
   2 -12   5    1.89    0.53
   2  12   5    2.26    0.70
  -3 -12  -5   -0.10    0.57
   3 -12   5    0.67    0.49
   3  12   5    0.40    0.57
   4 -12   5    0.77    0.55
  -4 -12  -5    1.96    0.71
   4  12   5    0.21    0.57
  -5 -12  -5    0.63    0.66
   5 -12   5    0.07    0.54
   5  12   5    0.29    0.62
  -6 -12  -5    0.63    0.69
   6  12   5    0.99    0.65
   7  12   5   -0.34    0.57
   8  12   5    0.41    0.64
   8 -13  -5    2.64    1.06
   8  13  -5    3.39    0.60
   7 -13  -5    1.40    0.93
   7  13  -5    0.77    0.42
   6 -13  -5   14.99    1.65
  -6  13   5   12.93    1.50
   6  13  -5   14.43    0.86
   5 -13  -5    3.84    0.97
   5  13  -5    5.04    0.53
  -5  13   5    4.57    0.97
   4 -13  -5   17.40    1.68
  -4  13   5   20.27    1.66
   4  13  -5   20.04    0.92
   3 -13  -5   -0.46    0.62
   3  13  -5   -0.29    0.23
  -3  13   5   -0.05    0.59
   2 -13  -5   17.49    1.49
  -2  13   5   18.44    1.48
   2  13  -5   16.88    0.90
   1 -13  -5   -0.76    0.55
  -1  13   5    0.23    0.54
   0 -13  -5    2.72    0.80
   0  13   5    0.62    0.63
  -1 -13  -5    0.39    0.64
   1  13   5    0.32    0.58
  -2 -13  -5   30.46    1.81
   2  13   5   31.97    1.86
  -3 -13  -5    1.12    0.63
   3  13   5   -0.13    0.54
  -4 -13  -5   29.93    1.85
   4  13   5   29.61    1.81
   5  13   5    6.97    1.07
   6  13   5   18.79    1.60
   7  13   5   -0.15    0.70
   6 -14  -5    7.81    1.36
  -6  14   5    8.10    1.30
   5 -14  -5    9.85    1.39
  -5  14   5   12.06    1.47
   4 -14  -5    0.48    0.77
  -4  14   5    1.57    0.70
   4  14  -5    0.63    0.30
   3 -14  -5    6.76    1.13
  -3  14   5    6.24    1.04
   3  14  -5    5.76    0.56
   2 -14  -5    5.29    1.01
  -2  14   5    3.40    0.85
   1 -14  -5    3.02    0.88
  -1  14   5    2.01    0.72
   0 -14  -5    4.98    0.98
   0  14   5    7.63    1.12
  -1 -14  -5    8.09    1.15
   1  14   5    9.85    1.23
   2  14   5    1.34    0.72
   3  14   5   -0.16    0.59
   4  14   5    1.17    0.69
   5  14   5   -0.66    0.59
   6  14   5    1.57    0.76
  -5  15   5    8.85    1.32
  -4  15   5    0.29    0.61
  -3  15   5    4.29    1.02
  -2  15   5   -0.46    0.53
  -1  15   5   39.73    2.24
   0  15   5    4.84    0.96
   1  15   5   28.17    1.90
   2  15   5   -0.91    0.53
   3  15   5   36.21    2.13
   4  15   5   -0.15    0.60
  -1  16   5    0.04    0.62
   0  16   5    3.70    0.93
   1  16   5    0.89    0.72
  13   0  -6    0.10    0.74
  12   0  -6    2.15    0.90
  11   0  -6    1.08    0.68
  10   0  -6   79.54    3.21
  10   0  -6   82.85    3.21
   9   0  -6   -0.22    0.51
   9   0  -6    0.09    0.46
   8   0  -6   61.42    2.38
   8   0  -6   56.36    2.35
   7   0  -6    0.24    0.35
   7   0  -6    0.21    0.43
   6   0  -6  107.23    3.36
  -6   0   6  101.24    3.30
   5   0  -6    0.05    0.34
   5   0  -6   -0.01    0.27
  -5   0   6    0.22    0.30
  -4   0   6   32.11    1.27
   4   0  -6   30.37    1.26
  -4   0   6   32.31    1.28
   4   0  -6   32.41    1.30
  -3   0   6    0.12    0.26
   3   0  -6   -0.31    0.25
  -3   0   6   -0.35    0.24
   3   0  -6   -0.14    0.26
  -2   0   6    2.93    0.38
  -2   0   6    3.42    0.40
   2   0  -6    3.08    0.39
   2   0  -6    3.05    0.39
  -1   0   6   -0.24    0.22
   1   0  -6    0.27    0.25
   1   0  -6   -0.27    0.22
  -1   0   6   -0.28    0.22
   0   0  -6   23.36    0.92
   0   0  -6   23.11    0.94
   0   0   6   22.03    0.90
   1   0   6    0.25    0.26
  -1   0  -6   -0.12    0.26
  -2   0  -6  240.86    6.45
   2   0   6  230.60    6.43
   3   0   6    0.09    0.33
  -3   0  -6   -0.37    0.26
   4   0   6   24.35    1.17
  -4   0  -6   18.46    1.06
  -5   0  -6   -0.04    0.35
   5   0   6   -0.26    0.38
   6   0   6   42.00    1.87
  -6   0  -6   40.56    1.81
   7   0   6   -0.05    0.45
  -7   0  -6   -0.13    0.38
   8   0   6   33.38    1.84
   9   0   6   -0.13    0.55
  10   0   6    0.41    0.65
  11   0   6    0.81    0.73
  12   0   6    9.72    1.43
  13   0   6   -0.61    0.80
  13  -1  -6    5.74    1.19
  13   1  -6    5.42    1.12
  12  -1  -6    9.14    1.30
  12   1  -6   13.15    1.46
  11  -1  -6   31.14    2.01
  11   1  -6   29.54    1.88
  10  -1  -6   78.61    3.25
  10   1  -6   85.05    3.23
  10   1  -6   83.90    3.22
   9  -1  -6    1.05    0.61
   9  -1  -6    0.91    0.51
   9   1  -6    2.02    0.61
   9   1  -6    0.70    0.51
   8  -1  -6    4.78    0.74
   8  -1  -6    3.53    0.72
   8   1  -6    5.52    0.78
   8   1  -6    4.46    0.68
   7  -1  -6   51.92    2.11
   7  -1  -6   50.52    2.06
   7   1  -6   49.35    2.00
   6  -1  -6   28.12    1.40
  -6  -1   6   30.57    1.32
   6  -1  -6   28.90    1.37
   6   1  -6   28.31    1.33
   6   1  -6   30.34    1.30
  -6   1   6   21.44    1.19
   5  -1  -6    0.83    0.35
   5  -1  -6    0.60    0.42
  -5  -1   6    1.04    0.37
   5   1  -6    1.22    0.37
   5   1  -6    0.75    0.35
  -5   1   6    0.81    0.33
   4  -1  -6    8.41    0.69
   4  -1  -6    8.97    0.75
  -4  -1   6    8.89    0.64
  -4   1   6    8.45    0.73
  -4   1   6   10.63    0.71
   4   1  -6    8.41    0.63
   4   1  -6    8.32    0.62
   3  -1  -6   -0.03    0.30
  -3  -1   6    1.01    0.28
   3  -1  -6    0.35    0.33
  -3  -1   6    1.14    0.28
   3   1  -6    1.02    0.29
  -3   1   6    0.79    0.33
  -3   1   6    0.55    0.26
   3   1  -6    0.16    0.25
  -2  -1   6   15.79    0.68
   2  -1  -6   14.89    0.81
   2  -1  -6   16.29    0.82
  -2  -1   6   16.43    0.70
   2   1  -6   15.81    0.69
  -2   1   6   14.87    0.80
   2   1  -6   15.78    0.68
  -1  -1   6    4.28    0.38
  -1  -1   6    5.06    0.41
   1  -1  -6    3.67    0.44
   1  -1  -6    3.66    0.45
   1   1  -6    4.53    0.39
  -1   1   6    4.15    0.47
   1   1  -6    4.78    0.41
   0  -1  -6   12.10    0.70
   0  -1   6    9.82    0.55
   0  -1  -6    9.18    0.63
   0   1   6    9.81    0.64
   0   1  -6    9.87    0.60
   0   1  -6   10.45    0.55
  -1  -1  -6   23.04    1.02
   1  -1   6   23.95    0.96
  -1   1  -6   23.55    0.94
   1   1   6   22.97    1.02
  -2  -1  -6   62.86    2.09
   2  -1   6   65.34    2.07
   2   1   6   62.40    2.11
  -2   1  -6   66.90    2.08
   3  -1   6    1.17    0.39
  -3  -1  -6    0.82    0.30
  -3   1  -6    1.60    0.39
   3   1   6    1.54    0.42
   4  -1   6    5.45    0.64
  -4  -1  -6    4.97    0.60
   4   1   6    4.96    0.66
  -5  -1  -6    1.10    0.42
   5  -1   6    0.83    0.45
   5   1   6    0.79    0.45
  -5   1  -6    0.94    0.42
   6  -1   6    7.25    0.84
  -6  -1  -6    7.81    0.85
  -6   1  -6    8.79    0.93
   6   1   6    6.72    0.80
   7  -1   6   31.79    1.68
  -7   1  -6   31.08    1.64
   7   1   6   31.32    1.70
   8  -1   6   21.42    1.46
   8   1   6   21.29    1.47
   9  -1   6   39.42    2.11
   9   1   6   37.33    2.08
  10  -1   6    6.54    1.13
  10   1   6    6.82    1.13
  11  -1   6    3.82    1.01
  11   1   6    5.74    1.12
  12  -1   6   32.44    2.21
  12   1   6   27.54    2.09
  13  -1   6    3.88    1.24
  13   1   6    2.51    1.04
  13  -2  -6    3.23    1.00
  13   2  -6    4.10    1.01
  12  -2  -6    1.31    0.82
  12   2  -6    1.59    0.77
  11  -2  -6   32.00    2.03
  11   2  -6   33.87    1.96
  10  -2  -6    1.35    0.70
  10   2  -6    2.16    0.63
  10   2  -6    0.62    0.60
   9  -2  -6   21.48    1.54
   9   2  -6   21.73    1.37
   9   2  -6   20.19    1.37
   8  -2  -6    0.87    0.50
   8  -2  -6    0.42    0.53
   8   2  -6    0.49    0.46
   8   2  -6    0.52    0.35
   7  -2  -6   67.32    2.58
   7  -2  -6   66.69    2.55
   7   2  -6   67.64    2.39
   7   2  -6   66.99    2.42
  -6  -2   6    6.89    0.66
   6  -2  -6    5.39    0.72
   6  -2  -6    4.80    0.65
   6   2  -6    6.16    0.63
   6   2  -6    5.89    0.63
  -6   2   6    6.27    0.73
  -5  -2   6   76.56    2.42
   5  -2  -6   78.17    2.65
   5  -2  -6   74.84    2.60
   5   2  -6   75.30    2.42
  -5   2   6   77.51    2.58
   5   2  -6   77.68    2.42
  -5   2   6   73.25    2.60
   4  -2  -6    1.03    0.37
  -4  -2   6    3.09    0.40
   4  -2  -6    2.86    0.53
  -4   2   6    1.80    0.44
   4   2  -6    2.27    0.37
  -4   2   6    1.46    0.40
   4   2  -6    2.57    0.39
  -3  -2   6  140.71    3.82
   3  -2  -6  136.58    4.06
   3  -2  -6  142.47    4.08
   3   2  -6  137.44    3.81
   3   2  -6  137.75    3.82
  -3   2   6  141.43    4.08
   2  -2  -6    0.58    0.31
  -2  -2   6    0.35    0.19
   2  -2  -6    0.43    0.30
  -2  -2   6    0.41    0.19
  -2   2   6    0.20    0.30
  -2   2   6   -0.09    0.17
   2   2  -6    0.54    0.20
   2   2  -6    0.61    0.20
   1  -2  -6  233.89    6.61
  -1  -2   6  242.73    6.33
   1  -2  -6  248.74    6.62
   1   2  -6  245.50    6.33
  -1   2   6  243.80    6.62
   1   2  -6  238.48    6.32
   0  -2   6    9.95    0.50
   0  -2  -6    9.38    0.71
   0  -2  -6   11.13    0.73
   0   2   6    9.73    0.65
   0   2   6   10.53    0.70
   0   2  -6   10.20    0.51
  -1  -2  -6    0.75    0.36
   1  -2   6    0.82    0.29
  -1  -2  -6    0.90    0.32
   1   2   6    1.22    0.36
  -1   2  -6    1.18    0.28
  -2  -2  -6   58.79    1.99
   2  -2   6   57.48    1.90
  -2   2  -6   59.25    1.91
   2   2   6   59.05    2.00
   3  -2   6  238.92    6.47
  -3  -2  -6  219.00    6.48
   3   2   6  235.11    6.52
  -3   2  -6  238.98    6.46
  -4  -2  -6   20.46    1.11
   4  -2   6   22.74    1.15
  -4   2  -6   16.28    1.00
   4   2   6   21.15    1.13
  -5  -2  -6   16.40    1.05
   5  -2   6   16.85    1.09
  -5   2  -6   18.12    1.08
   5   2   6   16.53    1.08
  -6  -2  -6    5.78    0.81
   6  -2   6    4.19    0.73
   6   2   6    4.35    0.68
  -6   2  -6    3.83    0.64
   7  -2   6   55.84    2.40
   7   2   6   64.55    2.49
  -7   2  -6   55.44    2.36
   8  -2   6    4.21    0.81
   8   2   6    4.23    0.83
   9  -2   6   67.25    2.87
   9   2   6   63.17    2.82
  10  -2   6    0.63    0.68
  10   2   6    0.18    0.65
  11  -2   6   15.29    1.62
  11   2   6   17.63    1.70
  12  -2   6    0.30    0.79
  12   2   6    0.20    0.72
  13  -2   6    2.85    1.04
  13   2   6    4.68    1.18
  13  -3  -6   29.76    2.19
  13   3  -6   26.26    1.92
  12  -3  -6    1.79    0.85
  12   3  -6    1.23    0.73
  11  -3  -6   19.66    1.81
  11   3  -6   19.40    1.48
  10  -3  -6   11.90    1.36
  10   3  -6   11.49    1.18
  10   3  -6   11.86    1.16
   9  -3  -6   49.68    2.42
   9   3  -6   50.75    2.21
   9   3  -6   54.74    2.20
   8  -3  -6   10.42    1.10
   8  -3  -6   11.04    1.15
   8   3  -6    9.76    0.94
   8   3  -6    8.90    0.86
   7  -3  -6   39.60    1.91
   7  -3  -6   45.13    1.95
   7   3  -6   42.81    1.73
   7   3  -6   40.88    1.67
  -6  -3   6    2.90    0.48
   6  -3  -6    2.05    0.55
   6  -3  -6    1.28    0.49
   6   3  -6    2.81    0.46
   6   3  -6    2.51    0.47
  -6   3   6    1.73    0.48
   5  -3  -6   22.44    1.25
  -5  -3   6   24.13    1.04
   5  -3  -6   25.02    1.33
   5   3  -6   23.50    1.01
  -5   3   6   25.07    1.28
   5   3  -6   23.41    1.04
  -5   3   6   22.09    1.26
   4  -3  -6  168.69    4.99
   4  -3  -6  171.22    5.02
  -4  -3   6  172.81    4.67
  -4   3   6  174.55    5.00
  -4   3   6  165.83    5.00
   4   3  -6  165.39    4.65
   4   3  -6  173.89    4.68
  -3  -3   6    4.96    0.38
   3  -3  -6    5.34    0.64
  -3   3   6    4.91    0.57
  -3   3   6    5.71    0.65
   3   3  -6    4.39    0.36
   3   3  -6    4.87    0.39
   2  -3  -6   13.63    0.83
   2  -3  -6   13.87    0.87
  -2  -3   6   14.25    0.49
   2   3  -6   13.76    0.49
   2   3  -6   13.05    0.47
  -2   3   6   15.00    0.88
   1  -3  -6    0.39    0.32
   1  -3  -6    0.25    0.32
  -1   3   6    0.73    0.34
  -1   3   6    0.11    0.23
   0  -3  -6   52.09    1.77
   0  -3   6   48.82    1.45
   0  -3  -6   46.77    1.76
   0   3  -6   50.54    1.45
   0   3   6   49.68    1.76
   0   3   6   50.95    1.79
  -1  -3  -6   36.01    1.45
   1  -3   6   38.04    1.26
   1   3   6   38.31    1.46
  -1   3  -6   38.24    1.26
  -2  -3  -6   18.17    1.01
   2  -3   6   23.48    0.99
  -2   3  -6   23.06    0.95
   2   3   6   21.24    1.07
  -3  -3  -6   21.20    1.12
   3  -3   6   21.88    1.06
  -3   3  -6   21.92    1.03
   3   3   6   20.23    1.11
   4  -3   6    7.55    0.76
  -4  -3  -6    6.71    0.71
  -4   3  -6    8.77    0.74
   4   3   6    9.66    0.83
  -5  -3  -6    7.20    0.75
   5  -3   6    4.76    0.70
   5   3   6    5.71    0.74
  -5   3  -6    6.28    0.72
  -6  -3  -6    1.48    0.53
   6  -3   6    1.20    0.54
  -6   3  -6    0.88    0.45
   6   3   6    1.28    0.53
   7  -3   6   22.71    1.43
   7   3   6   20.83    1.40
  -7   3  -6   25.87    1.45
   8  -3   6   16.20    1.45
   8   3   6   12.97    1.26
   9  -3   6   44.75    2.30
   9   3   6   45.85    2.31
  10  -3   6   13.83    1.52
  10   3   6   14.63    1.53
  11  -3   6   42.46    2.49
  11   3   6   42.25    2.39
  12  -3   6    5.55    1.25
  12   3   6    7.23    1.32
  13  -3   6   29.66    2.39
  13   3   6   32.09    2.35
  13  -4  -6    1.88    0.95
  13   4  -6    3.06    0.90
  12  -4  -6   23.72    1.92
  12   4  -6   19.66    1.57
  11  -4  -6    0.31    0.70
  11   4  -6   -0.16    0.55
  10  -4  -6   16.52    1.65
  10   4  -6   13.61    1.26
   9  -4  -6    2.21    0.80
   9   4  -6    2.93    0.66
   8  -4  -6   42.52    2.12
   8   4  -6   42.77    1.81
   8   4  -6   43.33    1.81
   7  -4  -6    7.82    0.95
   7  -4  -6    6.86    0.91
   7   4  -6    7.05    0.72
   7   4  -6    8.54    0.77
  -6  -4   6   36.94    1.45
   6  -4  -6   34.87    1.73
   6  -4  -6   36.01    1.72
  -6   4   6   34.95    1.71
   6   4  -6   35.20    1.42
   6   4  -6   36.33    1.42
  -6   4   6   38.62    1.75
   5  -4  -6   55.47    2.20
   5  -4  -6   57.24    2.22
  -5  -4   6   58.60    1.85
   5   4  -6   54.87    1.81
  -5   4   6   55.46    2.15
   5   4  -6   54.63    1.83
  -5   4   6   56.50    2.22
   4  -4  -6  108.64    3.56
  -4  -4   6  112.96    3.14
   4  -4  -6  111.07    3.56
   4   4  -6  110.45    3.12
  -4   4   6  109.73    3.56
   4   4  -6  115.44    3.14
  -4   4   6  113.38    3.54
   3  -4  -6  103.33    3.29
   3  -4  -6   99.69    3.26
  -3  -4   6  101.02    2.79
   3   4  -6  102.48    2.78
  -3   4   6  101.36    3.28
  -3   4   6  109.18    3.30
   3   4  -6  106.56    2.80
   2  -4  -6   37.29    1.54
   2  -4  -6   38.60    1.55
  -2   4   6   38.49    1.52
  -2   4   6   35.09    1.51
   1  -4  -6   29.61    1.32
   1  -4  -6   30.02    1.30
  -1   4   6   28.47    1.30
   0  -4  -6  377.94   10.00
   0  -4  -6  359.65    9.97
   0  -4   6  367.76    9.57
   0   4   6  371.92   10.01
   0   4  -6  372.19    9.56
  -1  -4  -6   26.70    1.23
   1  -4   6   27.07    0.99
  -1  -4  -6   25.69    1.23
  -1   4  -6   28.27    0.98
   1   4   6   26.60    1.23
   2  -4   6  142.26    3.98
  -2  -4  -6  147.21    4.19
  -2  -4  -6  137.91    4.14
   2   4   6  136.68    4.14
  -2   4  -6  133.69    3.94
  -3  -4  -6   48.10    1.95
   3  -4   6   55.75    1.91
  -3   4  -6   53.96    1.85
   3   4   6   53.02    1.99
   4  -4   6  137.74    4.16
  -4  -4  -6  137.86    4.25
   4   4   6  138.25    4.25
  -4   4  -6  137.36    4.14
   5  -4   6    2.50    0.59
  -5  -4  -6    2.91    0.60
   5   4   6    3.05    0.62
  -5   4  -6    3.59    0.58
   6  -4   6   13.80    1.11
   6   4   6   14.53    1.17
  -6   4  -6   13.89    1.04
   7  -4   6   34.78    1.84
   7   4   6   36.36    1.85
  -7   4  -6   39.70    1.87
   8  -4   6   51.75    2.39
   8   4   6   46.12    2.24
   9  -4   6    4.39    0.93
   9   4   6    4.71    0.94
  10  -4   6   49.76    2.60
  10   4   6   55.39    2.66
  11  -4   6    3.11    0.93
  11   4   6    3.27    0.93
  12  -4   6    7.53    1.33
  12   4   6    6.11    1.21
  12  -5  -6    7.26    1.26
  12   5  -6    7.48    1.13
  11  -5  -6    0.82    0.78
  11   5  -6   -0.34    0.52
  10  -5  -6   30.54    2.01
  10   5  -6   28.47    1.62
   9  -5  -6   10.68    1.25
   9   5  -6    9.88    1.00
   9   5  -6   10.11    0.98
   8  -5  -6   10.46    1.21
   8   5  -6    9.90    0.91
   8   5  -6   10.05    0.88
   7  -5  -6    3.02    0.75
   7   5  -6    3.57    0.54
   6  -5  -6    3.42    0.67
  -6  -5   6    3.39    0.47
   6  -5  -6    4.07    0.74
  -6   5   6    3.23    0.65
   6   5  -6    2.83    0.45
   5  -5  -6   13.36    1.06
  -5  -5   6   11.81    0.68
   5  -5  -6   10.15    0.97
   5   5  -6   10.68    0.63
  -5   5   6   13.54    1.09
  -5   5   6   10.89    0.94
   5   5  -6   11.43    0.68
   4  -5  -6   19.90    1.21
  -4  -5   6   20.13    0.79
   4  -5  -6   21.32    1.26
  -4   5   6   21.18    1.17
   4   5  -6   19.01    0.77
  -4   5   6   21.59    1.24
   4   5  -6   20.17    0.76
   3  -5  -6   -0.40    0.39
   3  -5  -6   -0.85    0.30
  -3   5   6    0.26    0.39
  -3   5   6   -0.26    0.31
   2  -5  -6    0.83    0.41
   2  -5  -6    1.13    0.44
  -2   5   6    0.66    0.38
  -2   5   6    1.00    0.43
   1  -5  -6    5.00    0.64
   1  -5  -6    4.80    0.64
  -1   5   6    5.34    0.67
  -1   5   6    4.99    0.62
   0  -5  -6    8.62    0.81
   0  -5   6    7.37    0.41
   0  -5  -6    7.30    0.74
   0  -5   6    7.75    0.41
   0   5   6    7.14    0.73
   0   5  -6    8.02    0.38
   1  -5   6    9.48    0.57
   1  -5   6    9.91    0.58
  -1  -5  -6    9.73    0.86
  -1  -5  -6    9.01    0.79
  -1   5  -6    9.36    0.53
   1   5   6    9.68    0.81
  -2  -5  -6   43.37    1.75
   2  -5   6   44.01    1.56
  -2  -5  -6   43.36    1.75
   2   5   6   44.94    1.76
  -2   5  -6   42.31    1.50
   3  -5   6    0.86    0.37
  -3  -5  -6    2.94    0.64
  -3  -5  -6    1.97    0.48
  -3   5  -6    1.39    0.38
   3   5   6    1.24    0.48
   4  -5   6    1.78    0.48
  -4  -5  -6    1.19    0.43
   4   5   6    1.60    0.51
  -4   5  -6    1.20    0.38
   5  -5   6    0.84    0.45
  -5   5  -6   -0.17    0.29
   5   5   6    0.49    0.46
   6  -5   6   43.33    1.96
  -6   5  -6   45.03    1.93
   6   5   6   41.53    1.96
   7  -5   6    0.55    0.51
  -7   5  -6    0.56    0.51
   7   5   6    0.66    0.52
   8  -5   6   30.45    1.84
   8   5   6   26.44    1.68
   9  -5   6    0.44    0.68
   9   5   6    0.55    0.63
  10  -5   6   25.55    1.86
  10   5   6   25.39    1.80
  11  -5   6    0.23    0.73
  11   5   6   -0.30    0.61
  12  -5   6   33.90    2.38
  12   5   6   31.81    2.20
  12  -6  -6    1.41    0.86
  12   6  -6    1.65    0.73
  11  -6  -6    1.31    0.90
  11   6  -6    2.26    0.70
  10  -6  -6    3.18    0.98
  10   6  -6    4.00    0.75
   9  -6  -6    1.12    0.69
   9   6  -6    0.30    0.50
   8  -6  -6   35.29    2.03
   8   6  -6   34.01    1.57
   7  -6  -6   10.01    1.20
   7   6  -6    9.25    0.79
   6  -6  -6   30.33    1.76
  -6  -6   6   36.20    1.38
   6   6  -6   36.18    1.37
  -6   6   6   34.49    1.79
   5  -6  -6   28.04    1.58
  -5  -6   6   28.79    1.11
   5  -6  -6   30.64    1.60
  -5   6   6   28.42    1.50
   5   6  -6   30.43    1.12
  -5   6   6   30.91    1.61
  -4  -6   6   29.73    1.00
   4  -6  -6   30.30    1.51
   4  -6  -6   29.71    1.56
   4   6  -6   29.11    0.98
  -4   6   6   28.45    1.50
  -4   6   6   29.75    1.51
   3  -6  -6   24.69    1.31
   3  -6  -6   23.78    1.34
  -3   6   6   25.80    1.34
  -3   6   6   24.94    1.34
   2  -6  -6   73.36    2.64
   2  -6  -6   72.27    2.61
  -2   6   6   77.45    2.64
  -2   6   6   78.33    2.68
   1  -6  -6    0.76    0.40
   1  -6  -6    0.48    0.38
  -1   6   6    0.23    0.35
  -1   6   6   -0.11    0.37
   0  -6  -6   67.36    2.38
   0  -6   6   64.04    1.90
   0  -6  -6   65.06    2.36
   0  -6   6   66.83    1.90
   0   6   6   65.97    2.37
   0   6   6   70.68    2.41
   0   6  -6   65.35    1.87
  -1  -6  -6   19.78    1.14
  -1  -6  -6   19.54    1.17
   1  -6   6   18.59    0.86
   1  -6   6   19.85    0.85
  -1   6  -6   20.75    0.82
   1   6   6   21.76    1.18
   2  -6   6   23.19    1.07
  -2  -6  -6   26.03    1.29
   2  -6   6   25.85    1.08
  -2  -6  -6   24.30    1.26
  -2   6  -6   24.48    1.03
   2   6   6   23.68    1.27
  -3  -6  -6   26.96    1.32
   3  -6   6   26.04    1.22
   3  -6   6   25.33    1.21
  -3  -6  -6   27.07    1.36
   3   6   6   23.96    1.30
  -3   6  -6   26.55    1.18
   4  -6   6   81.17    2.70
   4  -6   6   78.57    2.69
  -4   6  -6   78.80    2.65
   4   6   6   76.41    2.79
   5  -6   6   77.70    2.64
  -5   6  -6   57.36    2.41
   5   6   6   77.31    2.71
   6  -6   6   23.70    1.46
  -6   6  -6   24.47    1.37
   6   6   6   21.07    1.39
   7  -6   6    0.31    0.55
   7   6   6    0.53    0.59
  -7   6  -6    0.36    0.44
   8  -6   6   19.76    1.51
   8   6   6   20.87    1.50
   9  -6   6   19.50    1.69
   9   6   6   17.66    1.53
  10  -6   6    4.32    1.03
  10   6   6    3.41    0.97
  11  -6   6    0.38    0.71
  11   6   6    0.81    0.68
  12  -6   6    2.44    1.07
  12   6   6    1.73    0.95
  12  -7  -6   -0.53    0.77
  12   7  -6   -0.28    0.59
  11  -7  -6    1.30    0.86
  11   7  -6    3.02    0.74
  10  -7  -6    0.57    0.74
  10   7  -6   -0.27    0.49
   9  -7  -6   16.95    1.69
   9   7  -6   17.65    1.19
   8  -7  -6   -0.25    0.61
   8   7  -6    0.38    0.41
   7  -7  -6    3.50    0.85
   7   7  -6    3.22    0.52
  -7   7   6    2.54    0.73
   6  -7  -6   18.65    1.42
  -6  -7   6   19.89    0.95
   6   7  -6   19.22    0.94
  -6   7   6   17.54    1.40
  -5  -7   6    3.37    0.39
   5  -7  -6    2.24    0.63
   5   7  -6    3.09    0.37
  -5   7   6    4.44    0.75
  -5   7   6    3.72    0.74
  -4  -7   6    0.29    0.20
  -4  -7   6   -0.08    0.18
   4  -7  -6    0.11    0.46
  -4   7   6   -0.06    0.42
   4   7  -6    0.17    0.18
  -4   7   6   -0.30    0.35
   3  -7  -6   15.34    1.11
   3  -7  -6   14.13    1.09
  -3   7   6   14.52    1.08
  -3   7   6   12.29    1.02
   2  -7  -6    5.28    0.70
   2  -7  -6    4.58    0.67
  -2   7   6    4.32    0.68
  -2   7   6    5.66    0.73
   1  -7  -6    6.60    0.79
   1  -7  -6    7.38    0.80
  -1   7   6    7.43    0.81
  -1   7   6    7.78    0.84
   0  -7   6   78.67    2.23
   0  -7  -6   80.27    2.73
   0  -7   6   75.00    2.22
   0  -7  -6   76.95    2.73
   0   7   6   76.19    2.71
   0   7  -6   78.45    2.20
   0   7   6   77.64    2.73
  -1  -7  -6    0.14    0.27
   1  -7   6    0.42    0.27
  -1  -7  -6    1.22    0.45
   1  -7   6    0.16    0.24
   1   7   6    0.09    0.39
  -1   7  -6    0.41    0.21
   2  -7   6    3.75    0.49
  -2  -7  -6    3.54    0.61
   2  -7   6    3.72    0.47
  -2   7  -6    3.67    0.45
   2   7   6    3.92    0.66
   3  -7   6   -0.23    0.30
   3  -7   6    0.21    0.34
  -3  -7  -6   -0.24    0.40
  -3   7  -6    0.24    0.27
   3   7   6    0.05    0.38
  -4  -7  -6    3.59    0.69
   4  -7   6    4.23    0.65
  -4   7  -6    4.24    0.58
   4   7   6    3.31    0.65
   5  -7   6   19.73    1.23
   5   7   6   18.35    1.26
  -5   7  -6   11.80    0.94
   6  -7   6   11.63    1.12
  -6   7  -6   11.28    1.00
   6   7   6   11.88    1.16
   7  -7   6   22.64    1.55
   7   7   6   18.35    1.42
  -7   7  -6   20.82    1.38
   8  -7   6    1.19    0.71
   8   7   6    0.98    0.64
   9  -7   6   29.17    1.92
   9   7   6   30.58    1.94
  10  -7   6    2.81    0.94
  10   7   6    2.56    0.88
  11  -7   6    5.11    1.16
  11   7   6    6.81    1.17
  11  -8  -6   15.47    1.76
  11   8  -6   16.54    1.33
  10  -8  -6    1.28    0.85
  10   8  -6    0.23    0.53
   9  -8  -6   26.01    1.93
   9   8  -6   24.03    1.37
   8  -8  -6    3.65    0.95
   8   8  -6    5.66    0.68
   7  -8  -6   57.63    2.66
  -7   8   6   54.35    2.56
   7   8  -6   53.31    1.94
  -6  -8   6   10.51    0.74
   6  -8  -6   11.95    1.24
  -6   8   6   12.26    1.26
   6   8  -6   12.95    0.77
   5  -8  -6   27.54    1.66
  -5  -8   6   27.75    1.04
  -5  -8   6   27.11    1.04
  -5   8   6   26.54    1.66
   5   8  -6   26.90    1.02
  -4  -8   6   13.30    0.57
  -4  -8   6   13.60    0.58
   4  -8  -6   12.73    1.19
  -4   8   6   13.51    1.13
  -4   8   6   11.84    1.14
   3  -8  -6   64.71    2.54
  -3   8   6   63.51    2.51
  -3   8   6   66.52    2.56
   2  -8  -6    5.10    0.76
  -2   8   6    6.10    0.81
  -2   8   6    6.22    0.81
  -1  -8   6  193.39    4.94
   1  -8  -6  184.85    5.58
  -1   8   6  181.80    5.55
  -1   8   6  180.54    5.58
   0  -8   6    3.20    0.35
   0  -8   6    2.50    0.34
   0  -8  -6    1.74    0.51
   0   8   6    3.10    0.63
   0   8   6    2.44    0.59
   0   8  -6    2.75    0.33
  -1  -8  -6   32.65    1.59
   1  -8   6   31.95    1.23
   1  -8   6   32.28    1.22
  -1   8  -6   30.81    1.16
   1   8   6   33.04    1.60
   2  -8   6    8.27    0.71
   2  -8   6    8.01    0.68
  -2  -8  -6    8.06    0.86
   2   8   6    8.43    0.88
  -2   8  -6    7.96    0.61
  -3  -8  -6   98.92    3.38
   3  -8   6  102.12    3.27
   3  -8   6   99.01    3.18
  -3   8  -6  100.08    3.13
   3   8   6   98.26    3.40
  -4  -8  -6    9.90    1.03
   4  -8   6   11.53    1.00
  -4   8  -6    9.43    0.80
   4   8   6   10.29    1.01
   5  -8   6   65.15    2.44
  -5  -8  -6   62.79    2.52
   5   8   6   60.26    2.46
  -5   8  -6   50.23    2.19
   6  -8   6    6.10    0.88
  -6   8  -6    4.25    0.71
   6   8   6    6.22    0.95
   7  -8   6   36.04    1.97
   7   8   6   34.23    1.94
  -7   8  -6   37.60    1.90
   8  -8   6   -0.17    0.59
   8   8   6    0.69    0.64
   9  -8   6   10.83    1.35
   9   8   6   12.22    1.37
  10  -8   6    6.71    1.14
  10   8   6    4.13    1.01
  11  -8   6   11.05    1.54
  11   8   6   10.81    1.46
  11  -9  -6    7.77    1.42
  11   9  -6    6.08    0.92
  10  -9  -6   29.65    2.18
  10   9  -6   26.21    1.52
   9  -9  -6    1.42    0.83
   9   9  -6    2.26    0.59
   8  -9  -6    3.50    0.96
   8   9  -6    4.32    0.64
   7  -9  -6    4.61    0.98
   7   9  -6    4.29    0.57
  -7   9   6    4.20    0.93
   6  -9  -6   14.36    1.44
  -6  -9   6   13.30    0.83
   6   9  -6   14.15    0.80
  -6   9   6   15.12    1.44
  -5  -9   6    0.97    0.29
   5  -9  -6    0.79    0.63
  -5  -9   6    0.19    0.24
   5   9  -6    0.56    0.27
  -5   9   6    0.60    0.59
   4  -9  -6   16.60    1.38
  -4   9   6   16.17    1.32
  -4   9   6   21.22    1.37
   3  -9  -6   -0.15    0.52
  -3   9   6    0.01    0.45
  -3   9   6    1.00    0.50
   2  -9  -6    0.21    0.51
  -2   9   6    1.16    0.53
  -2   9   6    0.17    0.42
   1  -9  -6    0.72    0.52
  -1  -9   6    1.01    0.25
  -1  -9   6    0.67    0.24
  -1   9   6    1.28    0.52
  -1   9   6    1.44    0.50
   0  -9   6    1.25    0.28
   0  -9   6    0.63    0.29
   0  -9  -6    1.22    0.55
   0   9  -6    1.14    0.28
   0   9   6    1.31    0.53
   0   9   6    1.50    0.54
   1  -9   6    3.28    0.47
  -1  -9  -6    3.06    0.66
   1  -9   6    3.05    0.44
   1   9   6    2.46    0.61
  -1   9  -6    2.73    0.40
   2  -9   6    3.69    0.53
  -2  -9  -6    2.29    0.60
   2  -9   6    2.69    0.46
  -2   9  -6    2.84    0.46
   2   9   6    3.48    0.66
   3  -9   6    6.70    0.75
  -3  -9  -6    6.14    0.85
   3   9   6    5.25    0.83
  -3   9  -6    6.32    0.67
   4  -9   6    6.93    0.81
  -4  -9  -6    5.79    0.85
   4   9   6    6.47    0.89
  -4   9  -6    6.96    0.76
  -5  -9  -6   -0.59    0.51
   5  -9   6    0.64    0.52
   5   9   6    0.28    0.53
  -5   9  -6    0.67    0.42
   6  -9   6    1.03    0.63
  -6  -9  -6    1.64    0.75
   6   9   6    0.93    0.58
  -6   9  -6    0.77    0.50
   7  -9   6   -0.83    0.54
  -7  -9  -6   -0.65    0.85
   7   9   6   -0.10    0.52
  -7   9  -6   -0.05    0.48
   8  -9   6   11.72    1.35
   8   9   6   11.37    1.33
   9  -9   6    6.32    1.15
   9   9   6    8.43    1.21
  10  -9   6    2.79    0.97
  10   9   6    2.84    0.91
  10 -10  -6   13.07    1.64
  10  10  -6   14.36    1.17
   9 -10  -6    2.05    0.92
   9  10  -6    2.35    0.57
   8 -10  -6   22.67    1.93
   8  10  -6   23.52    1.23
   7 -10  -6    3.76    0.97
  -7  10   6    3.74    0.88
   7  10  -6    2.55    0.48
   6 -10  -6   34.40    2.08
  -6  10   6   35.36    2.04
   6  10  -6   35.10    1.32
  -5 -10   6    9.08    0.60
  -5 -10   6    9.62    0.61
   5 -10  -6   10.02    1.22
  -5  10   6    7.82    1.11
   5  10  -6   10.06    0.59
   4 -10  -6   62.98    2.71
  -4  10   6   62.68    2.70
   3 -10  -6    5.69    0.89
  -3  10   6    7.99    1.01
  -3  10   6    6.88    0.96
  -2 -10   6   75.27    2.12
  -2 -10   6   72.21    2.09
   2 -10  -6   72.08    2.85
  -2  10   6   74.09    2.83
  -2  10   6   71.98    2.89
   1 -10  -6    0.72    0.54
  -1 -10   6    0.76    0.27
  -1 -10   6    0.21    0.24
  -1  10   6    0.39    0.51
  -1  10   6    0.16    0.50
   0 -10   6   88.35    2.67
   0 -10  -6   87.95    3.20
   0 -10   6   90.26    2.67
   0  10   6   85.43    3.21
   0  10  -6   88.22    2.63
   0  10   6   89.21    3.23
  -1 -10  -6    1.83    0.61
   1 -10   6    1.22    0.39
   1 -10   6    1.37    0.38
  -1  10  -6    1.58    0.36
   1  10   6    1.07    0.54
   2 -10   6   76.48    2.56
  -2 -10  -6   73.20    2.86
  -2  10  -6   77.30    2.51
   2  10   6   76.45    2.91
  -3 -10  -6    7.89    0.98
   3 -10   6    5.65    0.73
   3  10   6    5.36    0.85
  -3  10  -6    6.75    0.71
   4 -10   6   21.01    1.32
  -4 -10  -6   22.23    1.48
  -4  10  -6   22.40    1.24
   4  10   6   22.38    1.50
  -5 -10  -6    5.66    0.90
   5 -10   6    6.26    0.88
  -5  10  -6    5.67    0.79
   5  10   6    6.41    0.96
   6 -10   6   89.85    3.43
  -6 -10  -6   97.61    3.54
   6  10   6   87.89    3.45
  -7 -10  -6    3.30    0.87
   7 -10   6    4.55    0.90
   7  10   6    5.59    1.02
   8 -10   6   23.66    1.80
  -8 -10  -6   23.66    1.91
   8  10   6   22.49    1.72
   9 -10   6    1.82    0.85
   9  10   6    0.03    0.65
  10 -10   6   12.44    1.58
  10  10   6   14.23    1.64
   9 -11  -6    6.13    1.27
   9  11  -6    4.25    0.69
   8 -11  -6    4.12    1.14
   8  11  -6    3.77    0.60
   7 -11  -6   16.54    1.74
   7  11  -6   20.51    1.03
  -7  11   6   22.56    1.75
   6 -11  -6    2.57    0.83
   6  11  -6    1.58    0.35
  -6  11   6    3.15    0.86
  -5 -11   6    4.33    0.44
   5 -11  -6    4.85    0.98
  -5  11   6    3.84    0.88
   4 -11  -6    5.08    1.00
  -4  11   6    4.91    0.93
   3 -11  -6    5.04    0.94
  -3  11   6    4.86    0.91
  -2 -11   6    2.65    0.34
  -2 -11   6    2.99    0.36
   2 -11  -6    2.63    0.72
  -2  11   6    1.38    0.54
  -2  11   6    2.89    0.75
  -1 -11   6    5.09    0.49
  -1 -11   6    5.19    0.50
   1 -11  -6    6.15    0.93
  -1  11   6    5.07    0.87
  -1  11   6    3.66    0.77
   0 -11   6    3.40    0.47
   0 -11  -6    4.82    0.84
   0  11   6    2.71    0.70
   0  11  -6    3.18    0.44
   1 -11   6    1.73    0.44
  -1 -11  -6    1.06    0.64
   1  11   6    3.84    0.79
  -1  11  -6    2.13    0.43
   2 -11   6    2.35    0.55
  -2 -11  -6    3.22    0.80
  -2  11  -6    2.91    0.53
   2  11   6    3.20    0.73
   3 -11   6    0.66    0.44
  -3 -11  -6    0.32    0.55
   3  11   6   -0.21    0.52
  -3  11  -6   -0.16    0.31
  -4 -11  -6    1.41    0.68
   4 -11   6    1.21    0.56
   4  11   6    0.84    0.63
  -5 -11  -6    0.91    0.63
   5 -11   6    0.51    0.58
   5  11   6    0.32    0.59
  -6 -11  -6    7.28    1.11
   6 -11   6    8.06    1.09
   6  11   6    7.30    1.10
   7 -11   6    0.34    0.69
  -7 -11  -6    1.53    0.80
   7  11   6    2.68    0.83
   8 -11   6    2.17    0.91
   8  11   6    3.11    0.87
   9  11   6    6.09    1.14
   9 -12  -6    6.13    1.33
   9  12  -6    6.43    0.77
   8 -12  -6    0.62    0.79
   8  12  -6    1.93    0.48
   7 -12  -6   32.19    2.25
   7  12  -6   30.36    1.24
  -7  12   6   27.99    2.07
   6 -12  -6    2.17    0.87
  -6  12   6   -0.01    0.64
   6  12  -6    0.77    0.30
   5 -12  -6   24.72    1.88
  -5  12   6   24.31    1.79
   4 -12  -6    4.20    0.96
  -4  12   6    4.53    0.95
   3 -12  -6   19.44    1.58
  -3  12   6   18.48    1.49
  -2 -12   6    3.19    0.40
   2 -12  -6    2.49    0.78
  -2  12   6    2.70    0.77
   1 -12  -6   26.31    1.69
  -1  12   6   25.62    1.65
  -1  12   6   24.61    1.69
   0 -12  -6   10.20    1.20
   0  12   6   10.88    1.23
   0  12   6    9.90    1.33
  -1 -12  -6   35.49    1.95
   1 -12   6   36.53    1.60
   1  12   6   39.43    2.02
   2 -12   6    1.17    0.51
  -2 -12  -6    2.14    0.73
   2  12   6    0.98    0.65
  -3 -12  -6   12.84    1.31
   3  12   6   13.69    1.36
  -4 -12  -6    0.42    0.58
   4  12   6   -0.04    0.58
  -5 -12  -6   37.44    2.08
   5  12   6   35.55    2.04
  -6 -12  -6    6.24    1.06
   6  12   6    8.76    1.20
   7  12   6    4.46    1.01
   8  12   6    0.53    0.74
   7 -13  -6    7.28    1.34
   6 -13  -6    7.06    1.29
  -6  13   6    8.43    1.33
   5 -13  -6    3.16    0.99
  -5  13   6    3.82    0.99
   4 -13  -6    0.10    0.67
  -4  13   6    0.11    0.61
   3 -13  -6   -0.07    0.69
  -3  13   6    0.88    0.62
   2 -13  -6   -0.32    0.62
  -2  13   6    0.24    0.59
   1 -13  -6    1.24    0.69
  -1  13   6    0.72    0.63
   0 -13  -6    0.44    0.67
   0  13   6    1.07    0.68
  -1 -13  -6    1.58    0.71
   1  13   6    1.05    0.66
  -2 -13  -6    0.01    0.66
   2  13   6    0.24    0.58
  -3 -13  -6   19.60    1.55
   3  13   6   18.44    1.56
  -4 -13  -6    1.78    0.78
   4  13   6    2.81    0.82
   5  13   6    7.75    1.20
   6  13   6    0.81    0.69
   7  13   6    3.19    0.97
   6 -14  -6    6.32    1.24
  -6  14   6    8.04    1.33
   5 -14  -6    2.96    1.03
  -5  14   6    2.21    0.87
   4 -14  -6   13.71    1.51
  -4  14   6   14.61    1.56
   3 -14  -6    6.05    1.09
  -3  14   6    5.35    1.06
   2 -14  -6    4.30    0.96
  -2  14   6    4.84    0.96
   1 -14  -6    6.37    1.08
  -1  14   6    8.33    1.18
   0 -14  -6   37.03    2.11
   0  14   6   36.54    2.13
  -1 -14  -6   15.62    1.52
   1  14   6   14.04    1.45
   2  14   6   15.80    1.54
   3  14   6    5.72    1.02
   4  14   6    7.10    1.17
   5  14   6    8.41    1.23
   6  14   6    5.34    1.13
  -4  15   6    5.85    1.14
  -3  15   6   -0.42    0.61
  -2  15   6    0.18    0.67
  -1  15   6   -0.44    0.60
   0  15   6    0.68    0.62
   1  15   6    1.60    0.78
   2  15   6    0.67    0.66
   3  15   6   -0.26    0.63
   4  15   6    4.32    1.04
  13   0  -7   16.09    1.73
  12   0  -7   -0.09    0.68
  11   0  -7   10.90    1.29
  10   0  -7    0.71    0.61
  10   0  -7   -0.47    0.47
   9   0  -7    8.93    1.04
   9   0  -7    9.73    1.03
   8   0  -7    0.42    0.41
   8   0  -7   -0.21    0.43
   7   0  -7    1.68    0.52
   7   0  -7    2.67    0.54
   6   0  -7    0.65    0.42
  -6   0   7    0.52    0.35
   6   0  -7    0.60    0.33
   5   0  -7    7.03    0.67
  -5   0   7    7.30    0.69
   5   0  -7    6.91    0.69
   4   0  -7   -0.60    0.26
  -4   0   7   -0.35    0.28
   4   0  -7   -0.55    0.28
  -4   0   7   -0.51    0.26
   3   0  -7    8.98    0.63
  -3   0   7    8.43    0.61
   3   0  -7    8.60    0.63
  -3   0   7    9.19    0.65
   2   0  -7    0.20    0.25
   2   0  -7   -0.04    0.25
  -2   0   7   -0.04    0.24
  -2   0   7   -0.10    0.22
   1   0  -7   48.39    1.62
  -1   0   7   50.61    1.62
  -1   0   7   47.27    1.62
   1   0  -7   51.57    1.63
   0   0  -7   -0.10    0.27
   0   0  -7    0.09    0.25
   0   0   7   -0.35    0.23
  -1   0  -7  320.65    8.57
   1   0   7  321.18    8.58
  -2   0  -7    0.33    0.29
   2   0   7    0.29    0.32
  -3   0  -7   98.21    3.06
   3   0   7   98.48    3.09
   4   0   7   -0.25    0.35
  -4   0  -7    0.02    0.33
  -5   0  -7   87.33    2.95
   5   0   7   85.26    2.95
  -6   0  -7    0.41    0.37
   6   0   7   -0.28    0.41
   7   0   7   66.73    2.67
   8   0   7   -0.32    0.49
   9   0   7   26.20    1.74
  10   0   7   -0.03    0.64
  11   0   7   40.06    2.43
  12   0   7   -0.73    0.67
  13   0   7   28.61    2.31
  13  -1  -7   14.87    1.71
  13   1  -7   13.69    1.61
  12  -1  -7    5.75    1.09
  12   1  -7    4.59    1.03
  11  -1  -7   46.95    2.43
  11   1  -7   42.81    2.28
  10  -1  -7   26.05    1.75
  10   1  -7   28.07    1.70
  10   1  -7   27.15    1.72
   9  -1  -7    7.06    0.94
   9  -1  -7    7.42    1.00
   9   1  -7    6.60    0.91
   9   1  -7    7.64    0.92
   8  -1  -7    5.84    0.79
   8  -1  -7    5.08    0.81
   8   1  -7    4.29    0.71
   8   1  -7    4.46    0.68
   7  -1  -7   45.61    1.93
   7  -1  -7   44.72    1.96
   7   1  -7   48.64    1.92
  -6  -1   7  106.50    3.33
   6  -1  -7  105.83    3.43
   6  -1  -7  105.63    3.45
   6   1  -7  106.79    3.33
   6   1  -7  106.19    3.37
  -6   1   7  108.20    3.42
   5  -1  -7   71.00    2.51
  -5  -1   7   76.87    2.45
   5  -1  -7   76.79    2.57
   5   1  -7   76.10    2.44
  -5   1   7   79.53    2.55
   5   1  -7   74.86    2.45
  -5   1   7   72.59    2.53
  -4  -1   7  202.78    5.72
   4  -1  -7  203.97    5.83
  -4  -1   7  208.91    5.72
   4  -1  -7  210.25    5.87
  -4   1   7  203.20    5.84
   4   1  -7  212.66    5.73
  -4   1   7  214.49    5.85
   4   1  -7  204.15    5.72
  -3  -1   7   72.92    2.20
   3  -1  -7   73.19    2.34
   3  -1  -7   70.30    2.31
  -3  -1   7   71.43    2.20
  -3   1   7   72.53    2.33
  -3   1   7   71.67    2.30
   3   1  -7   73.28    2.20
   3   1  -7   73.53    2.21
   2  -1  -7   84.31    2.58
  -2  -1   7   81.45    2.42
  -2  -1   7   80.75    2.42
   2  -1  -7   86.17    2.58
   2   1  -7   81.49    2.42
   2   1  -7   83.84    2.43
  -2   1   7   86.03    2.56
  -2   1   7   82.86    2.57
  -1  -1   7   71.92    2.20
  -1  -1   7   78.37    2.20
   1  -1  -7   75.64    2.33
   1  -1  -7   76.15    2.35
  -1   1   7   73.77    2.34
   1   1  -7   75.90    2.21
   1   1  -7   73.13    2.19
   0  -1  -7    0.51    0.31
   0  -1  -7    0.46    0.32
   0  -1   7    0.60    0.25
   0   1  -7    0.43    0.25
   0   1  -7    0.72    0.29
   0   1   7    0.10    0.28
   1  -1   7   80.83    2.46
  -1  -1  -7   82.97    2.54
  -1   1  -7   82.88    2.46
   1   1   7   81.22    2.54
  -2  -1  -7   19.97    0.99
   2  -1   7   19.09    0.95
  -2   1  -7   18.80    0.94
   2   1   7   20.68    1.01
   3  -1   7   18.10    1.00
   3   1   7   19.30    1.05
  -3   1  -7   20.08    1.00
  -4  -1  -7   22.91    1.19
   4  -1   7   22.61    1.22
   4   1   7   22.36    1.22
   5  -1   7   16.66    1.15
  -5  -1  -7   19.12    1.14
   5   1   7   18.81    1.17
  -5   1  -7   19.84    1.13
  -6  -1  -7   31.35    1.55
   6  -1   7   29.62    1.57
  -6   1  -7   29.40    1.54
   6   1   7   29.77    1.55
   7  -1   7   28.35    1.62
  -7   1  -7   30.09    1.61
   7   1   7   31.71    1.69
   8  -1   7    0.51    0.56
   8   1   7   -0.53    0.50
   9  -1   7    2.13    0.76
   9   1   7    1.53    0.72
  10  -1   7    4.14    0.94
  10   1   7    5.63    1.04
  11  -1   7   -0.15    0.69
  11   1   7   -0.22    0.76
  12  -1   7    0.93    0.84
  12   1   7    1.37    0.83
  13  -1   7    0.40    0.88
  13   1   7    1.14    0.91
  13  -2  -7   -0.67    0.69
  13   2  -7    0.92    0.76
  12  -2  -7    7.51    1.30
  12   2  -7    6.35    1.09
  11  -2  -7    0.19    0.65
  11   2  -7    0.52    0.63
  10  -2  -7    2.15    0.78
  10   2  -7    2.36    0.69
  10   2  -7    1.74    0.63
   9  -2  -7    1.22    0.63
   9  -2  -7    0.61    0.57
   9   2  -7    1.62    0.58
   9   2  -7   -0.20    0.41
   8  -2  -7    4.88    0.74
   8  -2  -7    3.42    0.75
   8   2  -7    4.00    0.68
   7  -2  -7    1.54    0.56
   7  -2  -7    1.58    0.52
   7   2  -7    1.66    0.43
   7   2  -7    0.85    0.43
   6  -2  -7    1.43    0.47
   6  -2  -7    1.38    0.49
  -6  -2   7    1.28    0.39
  -6   2   7    0.37    0.26
   6   2  -7    0.99    0.40
   6   2  -7    1.32    0.38
  -5  -2   7   46.01    1.63
   5  -2  -7   44.37    1.83
   5  -2  -7   46.65    1.83
  -5   2   7   45.12    1.82
   5   2  -7   45.32    1.63
   5   2  -7   45.04    1.64
   4  -2  -7    3.68    0.56
  -4  -2   7    4.73    0.47
   4   2  -7    4.88    0.48
  -4   2   7    4.30    0.58
   4   2  -7    5.20    0.49
  -3  -2   7   28.43    1.02
  -3  -2   7   28.26    1.01
   3  -2  -7   27.06    1.25
   3  -2  -7   28.00    1.23
   3   2  -7   27.87    1.02
  -3   2   7   28.82    1.26
   3   2  -7   27.42    1.01
  -2  -2   7   15.97    0.65
   2  -2  -7   16.42    0.89
   2  -2  -7   15.24    0.88
  -2  -2   7   15.42    0.64
   2   2  -7   15.21    0.64
   2   2  -7   15.98    0.65
  -2   2   7   15.61    0.91
   1  -2  -7   30.62    1.23
   1  -2  -7   30.38    1.23
  -1  -2   7   28.50    0.97
  -1   2   7   28.71    1.21
   1   2  -7   28.23    0.97
   1   2  -7   27.71    0.95
   0  -2   7   10.29    0.56
   0  -2  -7   10.26    0.73
   0  -2  -7   12.92    0.80
   0   2   7   11.02    0.77
   0   2  -7   11.24    0.56
   1  -2   7    0.25    0.25
  -1  -2  -7    0.19    0.29
  -1  -2  -7    0.37    0.33
  -1   2  -7    0.17    0.23
   1   2   7   -0.37    0.27
   2  -2   7   55.26    1.88
  -2   2  -7   59.43    1.91
   2   2   7   56.19    2.00
  -3  -2  -7   43.10    1.69
   3  -2   7   44.48    1.65
   3   2   7   41.25    1.69
  -3   2  -7   43.71    1.63
  -4  -2  -7   10.23    0.84
   4  -2   7    9.32    0.81
   4   2   7    9.17    0.89
   5  -2   7   22.78    1.28
  -5  -2  -7   23.95    1.30
  -5   2  -7   22.77    1.24
   5   2   7   25.43    1.37
  -6  -2  -7   88.90    3.09
   6  -2   7   83.83    3.02
  -6   2  -7   84.22    3.01
   6   2   7   83.95    3.05
   7  -2   7    1.62    0.60
   7   2   7    2.79    0.68
  -7   2  -7    2.55    0.60
   8  -2   7   73.54    2.96
   8   2   7   73.49    2.97
   9  -2   7    0.29    0.58
   9   2   7   -0.28    0.59
  10  -2   7   35.76    2.14
  10   2   7   33.19    2.09
  11  -2   7    3.69    1.02
  11   2   7    2.82    0.94
  12  -2   7   24.46    2.09
  12   2   7   24.77    2.04
  13  -2   7    1.10    0.89
  13   2   7    5.43    1.20
  13  -3  -7    8.73    1.40
  13   3  -7    9.60    1.32
  12  -3  -7   21.48    1.83
  12   3  -7   22.18    1.67
  11  -3  -7    2.26    0.83
  11   3  -7    0.82    0.63
  10  -3  -7   22.46    1.70
  10   3  -7   21.84    1.47
   9  -3  -7   11.46    1.28
   9   3  -7   12.06    1.03
   9   3  -7   10.08    1.04
   8  -3  -7   47.33    2.23
   8  -3  -7   48.98    2.22
   8   3  -7   48.67    1.99
   8   3  -7   49.41    1.97
   7  -3  -7    3.72    0.67
   7  -3  -7    3.33    0.69
   7   3  -7    3.43    0.56
   7   3  -7    3.52    0.56
  -6  -3   7  109.98    3.35
   6  -3  -7  107.94    3.64
   6  -3  -7  110.62    3.65
  -6   3   7  109.21    3.64
   6   3  -7  111.42    3.35
  -6   3   7  111.17    3.72
   6   3  -7  109.44    3.35
   5  -3  -7   11.14    0.90
  -5  -3   7    9.88    0.68
   5  -3  -7   10.48    0.92
  -5   3   7   10.30    0.90
  -5   3   7   10.84    0.89
   5   3  -7    9.76    0.68
   5   3  -7   10.91    0.67
   4  -3  -7  175.59    5.16
   4  -3  -7  178.10    5.15
  -4  -3   7  175.01    4.78
   4   3  -7  173.50    4.78
  -4   3   7  173.62    5.16
   4   3  -7  174.94    4.78
  -4   3   7  174.88    5.12
  -3  -3   7  104.15    2.88
   3  -3  -7  102.09    3.26
  -3   3   7  103.14    3.29
  -3   3   7  105.72    3.26
   3   3  -7  104.16    2.87
   3   3  -7  104.48    2.88
   2  -3  -7  135.32    4.04
  -2  -3   7  139.41    3.61
  -2  -3   7  134.51    3.60
   2   3  -7  137.58    3.60
  -2   3   7  132.53    4.04
   2   3  -7  131.42    3.58
  -2   3   7  138.57    4.03
  -1  -3   7    0.12    0.13
   1  -3  -7    0.52    0.32
   1  -3  -7   -0.02    0.27
  -1   3   7   -0.09    0.27
   1   3  -7    0.33    0.15
  -1   3   7    0.29    0.33
   1   3  -7    0.27    0.14
   0  -3  -7  154.60    4.39
   0  -3   7  144.60    4.00
   0   3  -7  154.34    4.02
   0   3   7  143.42    4.34
  -1  -3  -7   28.08    1.28
   1  -3   7   29.25    1.06
  -1   3  -7   30.29    1.06
   1   3   7   26.25    1.23
   2  -3   7  116.54    3.45
  -2  -3  -7  121.35    3.64
   2   3   7  118.29    3.63
  -2   3  -7  118.77    3.45
   3  -3   7   44.02    1.69
  -3  -3  -7   47.86    1.82
   3   3   7   43.90    1.78
  -3   3  -7   46.86    1.70
  -4  -3  -7   50.67    1.98
   4  -3   7   50.47    1.92
   4   3   7   48.22    1.96
  -4   3  -7   48.71    1.87
   5  -3   7    0.04    0.41
  -5  -3  -7   -0.10    0.34
   5   3   7   -0.13    0.39
  -5   3  -7   -0.23    0.28
   6  -3   7   37.00    1.78
   6   3   7   36.03    1.75
  -6   3  -7   36.71    1.72
   7  -3   7    8.87    1.04
  -7   3  -7    7.57    0.93
   7   3   7    8.44    1.02
   8  -3   7    9.47    1.12
   8   3   7    8.84    1.12
   9  -3   7   16.81    1.57
   9   3   7   12.83    1.41
  10  -3   7    7.06    1.16
  10   3   7    8.50    1.23
  11  -3   7    1.10    0.75
  11   3   7    0.55    0.77
  12  -3   7    1.12    0.91
  12   3   7    1.62    0.86
  13  -4  -7   15.43    1.83
  13   4  -7   15.15    1.59
  12  -4  -7    2.21    0.94
  12   4  -7    3.86    0.90
  11  -4  -7   -0.30    0.67
  11   4  -7   -0.11    0.53
  10  -4  -7    0.02    0.65
  10   4  -7   -0.03    0.52
   9  -4  -7   14.59    1.42
   9   4  -7   15.72    1.15
   8  -4  -7    7.40    1.04
   8   4  -7    8.13    0.81
   8   4  -7    7.21    0.79
   7  -4  -7    1.21    0.59
   7  -4  -7    0.87    0.53
   7   4  -7    1.64    0.47
   7   4  -7    1.37    0.39
   6  -4  -7   12.43    1.05
   6  -4  -7   11.47    1.09
  -6  -4   7   11.15    0.76
  -6   4   7   13.20    1.18
   6   4  -7   11.80    0.79
   6   4  -7   11.22    0.75
   5  -4  -7    2.36    0.57
   5  -4  -7    1.92    0.54
  -5  -4   7    2.44    0.38
  -5   4   7    2.85    0.59
  -5   4   7    2.61    0.56
   5   4  -7    2.78    0.39
   5   4  -7    2.12    0.34
   4  -4  -7    1.87    0.48
  -4  -4   7    1.54    0.27
   4  -4  -7    0.86    0.47
  -4   4   7    1.05    0.47
   4   4  -7    1.11    0.24
   4   4  -7    0.92    0.26
  -4   4   7    1.49    0.46
  -3  -4   7    0.26    0.15
   3  -4  -7    0.08    0.39
   3  -4  -7    0.12    0.38
  -3   4   7    0.67    0.38
   3   4  -7    0.19    0.16
  -3   4   7    0.22    0.39
   2  -4  -7    0.17    0.41
   2  -4  -7    0.83    0.38
  -2   4   7    0.35    0.36
  -2   4   7    0.60    0.38
   1  -4  -7   93.99    3.00
   1  -4  -7   93.38    3.01
  -1   4   7   93.29    2.97
  -1   4   7   93.03    3.01
   0  -4  -7    5.38    0.64
   0  -4  -7    4.61    0.62
   0  -4   7    4.99    0.35
   0   4  -7    4.45    0.33
   0   4   7    5.76    0.67
   0   4   7    3.74    0.55
   1  -4   7   49.54    1.57
  -1  -4  -7   48.35    1.85
  -1  -4  -7   48.52    1.85
   1   4   7   47.75    1.85
  -1   4  -7   50.30    1.56
   2  -4   7   48.58    1.67
  -2  -4  -7   48.87    1.89
  -2  -4  -7   47.11    1.86
   2   4   7   47.08    1.85
  -2   4  -7   49.61    1.65
   3  -4   7   16.58    0.95
  -3  -4  -7   19.55    1.12
  -3   4  -7   17.71    0.96
   3   4   7   18.59    1.10
  -4  -4  -7   29.70    1.48
   4  -4   7   30.40    1.41
   4   4   7   31.37    1.52
  -4   4  -7   33.47    1.41
   5  -4   7   52.64    2.10
  -5  -4  -7   53.93    2.14
   5   4   7   51.50    2.15
  -5   4  -7   52.28    2.06
   6  -4   7   36.40    1.75
   6   4   7   30.55    1.70
  -6   4  -7   39.19    1.73
   7  -4   7   22.56    1.46
  -7   4  -7   22.84    1.44
   7   4   7   21.64    1.50
   8  -4   7   27.21    1.72
   8   4   7   24.82    1.62
   9  -4   7   32.38    1.98
   9   4   7   28.10    1.86
  10  -4   7    9.72    1.29
  10   4   7   11.53    1.37
  11  -4   7   25.06    1.96
  11   4   7   24.50    1.93
  12  -4   7   11.11    1.58
  12   4   7   10.64    1.53
  12  -5  -7    0.97    0.82
  12   5  -7   -0.03    0.59
  11  -5  -7   22.47    1.90
  11   5  -7   21.70    1.51
  10  -5  -7    0.44    0.67
  10   5  -7   -0.65    0.44
   9  -5  -7   63.83    2.90
   9   5  -7   62.33    2.41
   8  -5  -7    8.71    1.15
   8   5  -7    9.25    0.86
   8   5  -7   10.32    0.91
   7  -5  -7   49.28    2.26
   7   5  -7   46.65    1.80
   7   5  -7   50.66    1.82
   6  -5  -7   19.04    1.25
  -6  -5   7   17.82    0.91
   6  -5  -7   17.79    1.32
  -6   5   7   15.49    1.21
   6   5  -7   17.23    0.90
   6   5  -7   16.10    0.85
   5  -5  -7   70.73    2.60
   5  -5  -7   70.81    2.64
  -5  -5   7   68.16    2.09
   5   5  -7   64.60    2.06
   5   5  -7   67.08    2.08
  -5   5   7   66.52    2.54
  -5   5   7   69.48    2.60
  -4  -5   7    0.02    0.18
   4  -5  -7   -0.03    0.40
   4  -5  -7    0.38    0.40
   4   5  -7   -0.07    0.15
  -4   5   7    0.08    0.37
   4   5  -7    0.12    0.18
  -4   5   7    0.47    0.42
   3  -5  -7   92.08    3.16
   3  -5  -7   95.28    3.17
  -3   5   7   97.16    3.18
  -3   5   7   95.85    3.20
   2  -5  -7   25.62    1.32
   2  -5  -7   26.80    1.37
  -2   5   7   28.14    1.34
  -2   5   7   25.97    1.34
   1  -5  -7   96.65    3.09
   1  -5  -7   94.88    3.08
  -1   5   7   95.60    3.10
  -1   5   7   88.30    3.02
   0  -5  -7    3.06    0.54
   0  -5   7    2.14    0.26
   0  -5   7    2.31    0.26
   0  -5  -7    2.76    0.54
   0   5  -7    2.95    0.26
   0   5   7    2.40    0.50
   0   5   7    2.60    0.54
  -1  -5  -7  169.00    4.92
   1  -5   7  163.07    4.54
  -1  -5  -7  167.51    4.93
   1   5   7  168.26    4.94
  -1   5  -7  162.87    4.52
  -2  -5  -7    1.81    0.53
   2  -5   7    1.74    0.38
  -2  -5  -7    2.04    0.53
  -2   5  -7    1.90    0.35
   2   5   7    1.73    0.48
  -3  -5  -7   31.85    1.52
   3  -5   7   22.40    1.13
  -3  -5  -7   24.24    1.30
   3   5   7   23.52    1.28
  -3   5  -7   23.14    1.11
   4  -5   7    5.91    0.70
  -4  -5  -7    6.18    0.82
   4   5   7    6.20    0.78
  -4   5  -7    5.31    0.62
   5  -5   7   13.49    1.05
  -5   5  -7    9.76    0.94
   5   5   7   12.17    1.04
   6  -5   7    5.67    0.83
   6   5   7    5.54    0.83
  -6   5  -7    5.31    0.76
   7  -5   7    0.07    0.53
   7   5   7    1.95    0.66
  -7   5  -7    0.97    0.52
   8  -5   7   -0.31    0.55
   8   5   7   -0.51    0.53
   9  -5   7   10.07    1.25
   9   5   7   10.24    1.29
  10  -5   7   -0.39    0.63
  10   5   7    0.31    0.67
  11  -5   7    1.06    0.83
  11   5   7    0.45    0.74
  12  -5   7   -0.48    0.74
  12   5   7    0.21    0.75
  12  -6  -7    8.18    1.35
  12   6  -7    8.36    1.13
  11  -6  -7    0.63    0.81
  11   6  -7   -0.06    0.54
  10  -6  -7    0.42    0.72
  10   6  -7   -0.01    0.48
   9  -6  -7    2.91    0.88
   9   6  -7    2.90    0.64
   8  -6  -7    7.75    1.09
   8   6  -7    6.23    0.69
   8   6  -7    5.86    0.72
   7  -6  -7    0.36    0.56
  -7   6   7    1.42    0.59
   7   6  -7    0.56    0.28
   7   6  -7    0.72    0.37
  -6  -6   7    1.92    0.38
   6  -6  -7    2.12    0.66
   6   6  -7    1.84    0.34
  -6   6   7    1.64    0.63
   6   6  -7    1.29    0.36
   5  -6  -7    1.67    0.57
  -5  -6   7    1.79    0.32
  -5   6   7    1.52    0.53
   5   6  -7    1.50    0.30
   5   6  -7    1.83    0.28
   4  -6  -7    9.87    0.98
   4  -6  -7    9.63    0.97
  -4   6   7   11.49    0.99
  -4   6   7   11.68    1.08
   3  -6  -7    5.07    0.70
   3  -6  -7    5.66    0.77
  -3   6   7    5.62    0.74
  -3   6   7    5.31    0.74
   2  -6  -7   16.31    1.13
   2  -6  -7   14.91    1.03
  -2   6   7   16.25    1.07
  -2   6   7   15.70    1.07
   1  -6  -7   26.26    1.38
   1  -6  -7   28.73    1.39
  -1   6   7   29.84    1.44
  -1   6   7   26.21    1.34
   0  -6   7    6.13    0.40
   0  -6  -7    6.35    0.72
   0  -6   7    6.08    0.38
   0  -6  -7    7.27    0.79
   0   6  -7    6.82    0.35
   0   6   7    6.41    0.72
   0   6   7    6.70    0.77
  -1  -6  -7   -0.35    0.37
  -1  -6  -7   -0.35    0.33
   1  -6   7    0.25    0.24
   1  -6   7   -0.12    0.23
  -1   6  -7    0.41    0.21
   1   6   7    0.40    0.38
   2  -6   7    4.39    0.50
   2  -6   7    4.71    0.50
  -2  -6  -7    4.25    0.66
  -2  -6  -7    4.62    0.68
  -2   6  -7    5.09    0.51
   2   6   7    4.67    0.66
  -3  -6  -7   24.20    1.36
   3  -6   7   25.54    1.19
  -3  -6  -7   23.46    1.33
  -3   6  -7   25.37    1.13
   3   6   7   22.42    1.31
   4  -6   7   29.43    1.42
  -4  -6  -7   27.16    1.56
   4   6   7   29.12    1.53
  -4   6  -7   29.21    1.34
   5  -6   7  115.92    3.84
   5   6   7  122.36    3.99
   6  -6   7   31.54    1.68
  -6   6  -7   35.53    1.67
   6   6   7   30.84    1.72
   7  -6   7   34.71    1.87
   7   6   7   31.79    1.83
  -7   6  -7   31.14    1.71
   8  -6   7   13.83    1.37
   8   6   7   14.88    1.43
   9  -6   7   23.81    1.82
   9   6   7   27.22    1.82
  10  -6   7    2.78    0.89
  10   6   7    2.77    0.89
  11  -6   7   14.09    1.64
  11   6   7   10.92    1.45
  12  -6   7    9.33    1.52
  12   6   7    7.61    1.34
  12  -7  -7   15.04    1.84
  12   7  -7   13.45    1.35
  11  -7  -7    2.16    0.95
  11   7  -7    5.48    0.87
  10  -7  -7   33.56    2.23
  10   7  -7   33.95    1.70
   9  -7  -7    1.05    0.72
   9   7  -7    0.33    0.46
   8  -7  -7   49.02    2.50
   8   7  -7   50.38    1.93
   7  -7  -7    6.31    1.04
  -7   7   7    3.72    0.81
   7   7  -7    4.13    0.52
   7   7  -7    4.63    0.57
   6  -7  -7   10.34    1.20
  -6  -7   7    9.80    0.66
   6   7  -7    9.03    0.65
  -6   7   7    9.46    1.10
   6   7  -7    8.73    0.59
   5  -7  -7   13.11    1.25
  -5  -7   7   14.84    0.68
  -5   7   7   15.05    1.26
   5   7  -7   14.52    0.63
   5   7  -7   15.21    0.67
   4  -7  -7   66.48    2.60
  -4   7   7   69.93    2.62
  -4   7   7   62.97    2.58
   3  -7  -7   10.19    1.00
  -3   7   7    9.24    1.01
  -3   7   7    8.24    0.88
   2  -7  -7   42.28    1.78
   2  -7  -7   33.63    1.67
  -2   7   7   33.54    1.68
  -2   7   7   36.74    1.68
   1  -7  -7   18.84    1.21
   1  -7  -7   22.81    1.29
  -1   7   7   21.17    1.25
  -1   7   7   19.76    1.19
   0  -7   7   20.10    0.74
   0  -7  -7   18.97    1.20
   0  -7   7   16.01    0.71
   0  -7  -7   18.44    1.16
   0   7   7   20.55    1.22
   0   7   7   21.19    1.24
   0   7  -7   18.49    0.68
  -1  -7  -7    5.08    0.70
   1  -7   7    5.23    0.46
  -1  -7  -7    5.30    0.72
   1  -7   7    4.15    0.44
  -1   7  -7    4.63    0.41
   1   7   7    3.36    0.62
   2  -7   7   53.13    1.86
  -2  -7  -7   51.52    2.12
   2  -7   7   57.29    1.88
  -2   7  -7   55.55    1.83
   2   7   7   54.15    2.19
   3  -7   7   15.02    0.94
   3  -7   7   13.19    0.89
  -3  -7  -7   14.06    1.13
   3   7   7   14.50    1.10
  -3   7  -7   14.79    0.88
   4  -7   7   27.20    1.40
  -4  -7  -7   28.55    1.54
  -4   7  -7   28.09    1.32
   4   7   7   25.55    1.47
   5  -7   7   30.61    1.54
   5   7   7   23.12    1.48
   6  -7   7    7.59    0.96
  -6   7  -7    6.35    0.85
   6   7   7    7.71    0.97
   7  -7   7    0.03    0.52
  -7   7  -7    0.34    0.44
   7   7   7   -0.17    0.56
   8  -7   7    0.94    0.70
   8   7   7    1.77    0.76
   9  -7   7    1.93    0.82
   9   7   7    2.12    0.78
  10  -7   7    1.28    0.84
  10   7   7    3.01    0.89
  11  -7   7    1.26    0.87
  11   7   7    0.44    0.82
  11  -8  -7    3.27    1.04
  11   8  -7    3.02    0.74
  10  -8  -7    0.09    0.77
  10   8  -7    0.43    0.53
   9  -8  -7    0.44    0.75
   9   8  -7    1.03    0.49
   8  -8  -7    1.13    0.74
   8   8  -7    0.22    0.40
   7  -8  -7   -0.38    0.56
  -7   8   7    0.08    0.54
   7   8  -7   -0.09    0.31
   7   8  -7    0.28    0.25
   6  -8  -7    8.69    1.11
  -6  -8   7    8.18    0.61
  -6   8   7    7.87    1.09
   6   8  -7    8.13    0.54
   6   8  -7    9.24    0.61
   5  -8  -7    2.02    0.70
  -5  -8   7    4.11    0.36
  -5  -8   7    2.69    0.32
  -5   8   7    2.66    0.71
   4  -8  -7   14.53    1.25
  -4   8   7   13.84    1.22
   3  -8  -7    1.64    0.64
  -3   8   7    1.34    0.57
  -3   8   7    1.03    0.50
   2  -8  -7   28.68    1.57
  -2   8   7   27.86    1.57
  -2   8   7   27.74    1.50
   1  -8  -7   -0.34    0.41
  -1   8   7    0.24    0.42
  -1   8   7   -0.03    0.38
   0  -8   7   33.72    1.13
   0  -8   7   30.94    1.11
   0  -8  -7   33.87    1.65
   0   8   7   34.61    1.67
   0   8  -7   34.15    1.09
   0   8   7   35.99    1.72
   1  -8   7    9.40    0.65
  -1  -8  -7    9.99    1.01
   1  -8   7   10.13    0.61
  -1   8  -7   10.12    0.58
   1   8   7    8.53    0.91
   2  -8   7   21.15    1.05
  -2  -8  -7   20.99    1.36
   2  -8   7   21.61    1.02
  -2   8  -7   21.76    0.98
   2   8   7   22.44    1.37
   3  -8   7    3.44    0.57
  -3  -8  -7    4.22    0.72
  -3   8  -7    4.25    0.55
   3   8   7    3.98    0.69
   4  -8   7   24.01    1.33
  -4  -8  -7   22.64    1.46
   4   8   7   23.85    1.47
  -4   8  -7   26.55    1.27
   5  -8   7    2.53    0.63
  -5  -8  -7    1.53    0.65
   5   8   7    2.00    0.65
   6  -8   7   49.73    2.30
  -6  -8  -7   54.20    2.52
   6   8   7   51.77    2.38
  -6   8  -7   52.26    2.22
   7  -8   7    9.19    1.14
  -7   8  -7   11.32    1.18
   7   8   7   10.99    1.28
   8  -8   7   21.54    1.64
   8   8   7   20.33    1.61
   9  -8   7   13.46    1.54
   9   8   7   12.72    1.42
  10  -8   7   12.99    1.58
  10   8   7   11.03    1.44
  11  -8   7    3.52    1.04
  11   8   7    3.59    1.02
  11  -9  -7   24.17    2.14
  11   9  -7   22.68    1.48
  10  -9  -7    1.66    1.01
  10   9  -7    1.62    0.60
   9  -9  -7   21.46    1.99
   9   9  -7   18.34    1.15
   8  -9  -7    0.83    0.76
   8   9  -7    0.73    0.41
   7  -9  -7   29.38    1.95
   7   9  -7   27.71    1.19
  -7   9   7   25.19    1.82
   6  -9  -7    5.49    1.00
  -6  -9   7    4.55    0.46
  -6  -9   7    4.95    0.48
   6   9  -7    5.16    0.47
  -6   9   7    4.61    0.91
   5  -9  -7   53.65    2.48
  -5   9   7   49.21    2.38
   4  -9  -7   25.06    1.58
  -4   9   7   19.68    1.47
   3  -9  -7   81.69    3.10
  -3   9   7   78.48    3.07
  -3   9   7   79.92    3.02
   2  -9  -7   16.67    1.29
  -2   9   7   15.67    1.16
  -2   9   7   14.83    1.25
   1  -9  -7   46.21    2.07
  -1   9   7   49.10    2.15
  -1   9   7   45.20    2.05
   0  -9   7    4.54    0.42
   0  -9  -7    3.36    0.72
   0  -9   7    4.03    0.39
   0   9  -7    3.72    0.36
   0   9   7    4.04    0.72
   0   9   7    6.07    0.88
   1  -9   7   27.27    1.10
   1  -9   7   26.08    1.10
  -1  -9  -7   21.65    1.42
   1   9   7   26.21    1.52
  -1   9  -7   26.63    1.04
   2  -9   7    0.56    0.38
  -2  -9  -7    0.78    0.52
   2  -9   7    0.24    0.32
   2   9   7    0.36    0.46
  -2   9  -7    0.57    0.30
   3  -9   7   30.85    1.46
  -3  -9  -7   32.69    1.70
  -3   9  -7   30.94    1.36
   3   9   7   31.56    1.73
   4  -9   7   11.95    1.04
  -4  -9  -7   12.00    1.19
   4   9   7   12.01    1.21
  -4   9  -7   12.63    0.90
  -5  -9  -7   -0.87    0.51
   5  -9   7    0.49    0.49
   5   9   7   -0.22    0.51
  -5   9  -7   -0.06    0.28
   6  -9   7    7.40    1.00
  -6  -9  -7    6.56    1.02
  -6   9  -7    6.31    0.88
   6   9   7    7.77    1.05
  -7  -9  -7   19.11    1.70
   7  -9   7   22.48    1.62
   7   9   7   20.82    1.61
   8  -9   7    1.04    0.73
   8   9   7    0.55    0.69
   9  -9   7    0.30    0.71
   9   9   7    0.75    0.75
  10  -9   7    0.37    0.82
  10   9   7    2.57    0.93
  10 -10  -7    0.08    0.80
  10  10  -7    0.38    0.48
   9 -10  -7    0.39    0.83
   9  10  -7    0.23    0.43
   8 -10  -7    0.26    0.72
   8  10  -7    0.53    0.38
   7 -10  -7    1.49    0.79
   7  10  -7    1.94    0.40
  -7  10   7    1.39    0.77
   6 -10  -7    8.47    1.20
  -6  10   7    6.69    1.05
   5 -10  -7    1.20    0.70
  -5  10   7    0.20    0.58
   4 -10  -7   10.22    1.19
  -4  10   7    8.90    1.10
   3 -10  -7    4.47    0.89
  -3  10   7    3.66    0.81
   2 -10  -7    4.85    0.87
  -2  10   7    5.48    0.88
  -2  10   7    4.68    0.80
   1 -10  -7   25.77    1.59
  -1  10   7   25.80    1.54
  -1  10   7   21.25    1.47
   0 -10   7    7.74    0.57
   0 -10  -7    8.25    1.01
   0 -10   7    8.44    0.56
   0  10  -7    7.04    0.52
   0  10   7    6.84    0.94
   0  10   7    6.75    0.94
  -1 -10  -7   35.55    1.83
   1 -10   7   33.62    1.34
   1 -10   7   35.67    1.37
  -1  10  -7   35.37    1.32
   1  10   7   33.59    1.82
   2 -10   7   -0.07    0.35
  -2 -10  -7    0.33    0.53
   2  10   7    0.20    0.50
  -2  10  -7    0.10    0.27
   3 -10   7    9.71    0.90
  -3 -10  -7    8.43    1.01
  -3  10  -7    9.32    0.77
   3  10   7   10.62    1.12
  -4 -10  -7   10.15    1.11
   4 -10   7   11.48    1.05
   4  10   7    9.69    1.11
  -4  10  -7   11.20    0.90
  -5 -10  -7   27.98    1.74
   5 -10   7   23.59    1.52
   5  10   7   25.33    1.63
  -6 -10  -7    0.56    0.71
   6 -10   7    0.90    0.61
   6  10   7    0.59    0.65
   7 -10   7   19.46    1.57
  -7 -10  -7   17.01    1.59
   7  10   7   20.29    1.62
  -8 -10  -7    0.23    0.87
   8 -10   7   -0.18    0.60
   8  10   7    2.05    0.81
  -9 -10  -7   18.68    2.01
   9 -10   7   22.75    1.86
   9  10   7   25.17    1.88
  10  10   7   -0.15    0.68
   9 -11  -7    7.58    1.39
   9  11  -7    8.74    0.81
   8 -11  -7   18.89    1.94
   8  11  -7   21.55    1.06
   7 -11  -7   22.33    1.97
  -7  11   7   25.06    1.92
   7  11  -7   22.15    0.96
   6 -11  -7   26.58    1.95
  -6  11   7   23.05    1.79
   5 -11  -7   31.73    2.05
  -5  11   7   29.94    1.96
   4 -11  -7   27.56    1.84
  -4  11   7   22.37    1.68
   3 -11  -7   40.20    2.15
  -3  11   7   35.58    2.02
   2 -11  -7    6.86    1.00
  -2  11   7    5.17    0.92
  -1 -11   7    9.16    0.53
   1 -11  -7    8.00    1.05
  -1 -11   7    8.82    0.53
  -1  11   7    9.41    1.11
  -1  11   7    8.41    1.08
   0 -11   7   10.48    0.68
   0 -11  -7    9.02    1.05
   0 -11   7   10.06    0.66
   0  11   7    9.34    1.18
   0  11  -7    9.99    0.65
   0  11   7    7.69    1.04
  -1 -11  -7    2.42    0.74
   1 -11   7    2.66    0.47
   1  11   7    2.56    0.72
  -1  11  -7    2.28    0.41
  -2 -11  -7   26.44    1.68
   2 -11   7   26.87    1.31
  -2  11  -7   25.87    1.21
   2  11   7   27.75    1.68
   3 -11   7    5.16    0.73
  -3 -11  -7    6.85    1.02
   3  11   7    5.54    0.95
  -4 -11  -7    4.13    0.87
   4 -11   7    3.21    0.68
   4  11   7    3.89    0.84
  -5 -11  -7    4.02    0.84
   5 -11   7    4.20    0.82
   5  11   7    3.50    0.88
  -6 -11  -7   13.98    1.41
   6 -11   7   17.51    1.44
   6  11   7   14.75    1.47
  -7 -11  -7    6.77    1.18
   7  11   7    6.99    1.13
  -8 -11  -7   -0.37    0.71
   8  11   7   -0.42    0.63
   9  11   7    0.60    0.72
   8 -12  -7   -0.54    0.81
   7 -12  -7    0.73    0.82
  -7  12   7   -0.11    0.67
   6 -12  -7    0.29    0.76
  -6  12   7    0.20    0.66
   5 -12  -7    1.62    0.83
  -5  12   7    0.44    0.69
   4 -12  -7   10.06    1.32
  -4  12   7    9.13    1.23
   3 -12  -7    9.47    1.22
  -3  12   7   10.31    1.28
   2 -12  -7    1.68    0.72
  -2  12   7    2.37    0.76
  -1 -12   7    0.28    0.26
   1 -12  -7    0.70    0.58
  -1  12   7    0.42    0.57
   0 -12  -7   24.13    1.66
   0  12   7   21.34    1.59
   0  12   7   25.64    2.14
  -1 -12  -7    6.39    1.02
   1  12   7    5.39    0.96
  -2 -12  -7   41.00    2.18
   2  12   7   43.23    2.20
  -3 -12  -7   12.13    1.31
   3  12   7   11.88    1.29
  -4 -12  -7   19.32    1.53
   4  12   7   14.46    1.46
  -5 -12  -7    4.20    0.91
   5  12   7    2.71    0.84
  -6 -12  -7   11.81    1.37
   6  12   7   14.52    1.49
   7  12   7    3.04    0.90
   8  12   7   20.53    1.82
   7 -13  -7   12.89    1.66
  -7  13   7   15.02    1.73
   6 -13  -7   15.98    1.71
  -6  13   7   10.72    1.41
   5 -13  -7    1.12    0.88
  -5  13   7    2.15    0.81
   4 -13  -7   20.78    1.79
  -4  13   7   16.10    1.63
   3 -13  -7    5.34    1.05
  -3  13   7    5.68    1.02
   2 -13  -7   18.73    1.70
  -2  13   7   18.96    1.58
   1 -13  -7    3.14    0.84
  -1  13   7    1.18    0.75
   0 -13  -7   25.35    1.78
   0  13   7   23.68    1.72
  -1 -13  -7    8.17    1.15
   1  13   7    7.61    1.16
  -2 -13  -7    8.27    1.19
   2  13   7    5.95    1.03
  -3 -13  -7    1.63    0.72
   3  13   7    2.16    0.79
  -4 -13  -7    2.38    0.82
   4  13   7    2.39    0.83
   5  13   7    0.44    0.68
   6  13   7    7.33    1.21
   7  13   7    2.68    0.88
   6 -14  -7    1.43    0.95
  -6  14   7    0.78    0.74
   5 -14  -7    2.22    0.97
  -5  14   7    3.59    0.99
   4 -14  -7   -0.38    0.69
  -4  14   7   -0.17    0.63
   3 -14  -7    0.32    0.77
  -3  14   7    1.15    0.69
   2 -14  -7    1.15    0.77
  -2  14   7   -0.44    0.57
   1 -14  -7    4.56    1.01
  -1  14   7    5.94    1.04
   0 -14  -7    4.70    0.95
   0  14   7    3.29    0.89
  -1 -14  -7    5.10    1.02
   1  14   7    3.54    0.93
  -2 -14  -7    4.49    0.97
   2  14   7    6.32    1.08
   3  14   7    8.25    1.21
   4  14   7    4.62    1.01
   5  14   7    4.08    0.98
  -4  15   7    0.71    0.80
  -3  15   7    7.72    1.22
  -2  15   7    2.21    0.83
  -1  15   7   16.93    1.70
   0  15   7    3.04    0.92
   1  15   7   21.48    1.78
   2  15   7    0.37    0.70
   3  15   7    7.07    1.17
  13   0  -8    0.28    0.78
  12   0  -8   25.70    1.87
  11   0  -8   -0.75    0.57
  10   0  -8   43.84    2.22
  10   0  -8   47.40    2.23
   9   0  -8   -0.39    0.48
   9   0  -8   -0.23    0.39
   8   0  -8   11.63    1.11
   8   0  -8   13.99    1.05
   7   0  -8   -0.29    0.38
   7   0  -8    0.11    0.33
  -6   0   8  116.06    3.59
   6   0  -8  113.87    3.61
   6   0  -8  112.02    3.58
   5   0  -8   -0.12    0.30
  -5   0   8   -0.10    0.28
   5   0  -8   -0.15    0.27
  -5   0   8    0.09    0.31
  -4   0   8   28.24    1.22
   4   0  -8   27.99    1.20
   4   0  -8   26.59    1.21
  -4   0   8   27.59    1.19
   3   0  -8    0.08    0.27
   3   0  -8   -0.19    0.27
  -3   0   8   -0.17    0.24
  -3   0   8   -0.23    0.25
  -2   0   8  220.59    5.96
  -2   0   8  216.44    5.97
   2   0  -8  215.09    5.96
   2   0  -8  219.98    5.98
  -1   0   8    0.00    0.25
  -1   0   8   -0.05    0.25
   1   0  -8    0.18    0.25
   1   0  -8   -0.01    0.25
   0   0  -8  228.12    6.21
   0   0   8  225.82    6.22
   0   0  -8  230.22    6.23
   1   0   8    0.31    0.30
  -1   0  -8   -0.15    0.26
  -2   0  -8   12.12    0.75
   2   0   8   10.77    0.78
  -3   0  -8   -0.04    0.25
   3   0   8    0.02    0.33
  -4   0  -8   10.70    0.87
   4   0   8   11.60    0.90
   5   0   8   -0.54    0.38
  -5   0  -8    0.00    0.36
   6   0   8    5.44    0.82
  -6   0  -8    4.74    0.76
   7   0   8   -0.28    0.45
   8   0   8    1.20    0.62
   9   0   8    0.52    0.65
  10   0   8    0.00    0.65
  11   0   8    0.39    0.73
  12   0   8   16.25    1.79
  13  -1  -8    0.58    0.76
  13   1  -8    1.32    0.84
  12  -1  -8    1.48    0.82
  12   1  -8    1.58    0.78
  11  -1  -8    3.60    0.94
  11   1  -8    2.99    0.82
  10  -1  -8    0.78    0.62
  10   1  -8    1.18    0.58
  10   1  -8    1.03    0.63
   9  -1  -8    0.12    0.54
   9  -1  -8    1.44    0.59
   9   1  -8    1.79    0.57
   9   1  -8    0.72    0.57
   8  -1  -8   11.72    1.03
   8  -1  -8    9.91    1.07
   8   1  -8   11.30    1.05
   8   1  -8   11.49    0.95
   7  -1  -8   26.66    1.41
   7  -1  -8   27.43    1.41
   7   1  -8   24.96    1.31
   7   1  -8   18.41    1.13
  -6  -1   8    3.14    0.51
   6  -1  -8    1.97    0.54
   6  -1  -8    2.75    0.54
   6   1  -8    3.06    0.50
   6   1  -8    2.08    0.49
  -6   1   8    2.45    0.50
  -5  -1   8   50.18    1.78
   5  -1  -8   50.02    1.92
   5   1  -8   49.01    1.80
  -5   1   8   48.53    1.90
  -5   1   8   50.85    1.89
   5   1  -8   49.77    1.79
   4  -1  -8  109.64    3.39
  -4  -1   8  111.33    3.27
  -4  -1   8  104.79    3.25
   4  -1  -8  112.04    3.41
   4   1  -8  112.06    3.28
   4   1  -8  110.47    3.29
  -4   1   8  112.97    3.39
  -4   1   8  110.14    3.40
  -3  -1   8  109.82    3.19
   3  -1  -8  109.44    3.33
   3  -1  -8  111.90    3.33
  -3  -1   8  110.89    3.19
   3   1  -8  109.88    3.19
  -3   1   8  112.21    3.33
  -3   1   8  108.38    3.34
   3   1  -8  108.58    3.19
  -2  -1   8   40.25    1.38
   2  -1  -8   40.78    1.52
  -2  -1   8   41.59    1.38
   2  -1  -8   40.73    1.51
   2   1  -8   39.39    1.37
   2   1  -8   40.90    1.39
  -2   1   8   40.36    1.52
  -2   1   8   40.69    1.50
  -1  -1   8   31.81    1.14
  -1  -1   8   30.79    1.14
   1  -1  -8   31.43    1.26
   1  -1  -8   30.83    1.27
  -1   1   8   30.35    1.23
   1   1  -8   33.26    1.14
  -1   1   8   30.83    1.26
   1   1  -8   29.93    1.14
   0  -1  -8   96.83    2.87
   0  -1  -8   94.22    2.88
   0  -1   8   91.94    2.75
   0   1   8   92.08    2.86
   0   1  -8   96.42    2.77
   0   1  -8   92.92    2.74
  -1  -1  -8   10.61    0.70
   1  -1   8    9.62    0.67
  -1   1  -8   10.93    0.67
   1   1   8   10.32    0.72
  -2  -1  -8  103.46    3.18
   2  -1   8  103.19    3.13
  -2   1  -8  101.85    3.11
   2   1   8  104.17    3.20
   3  -1   8  110.90    3.29
  -3  -1  -8   88.55    3.23
  -3   1  -8  111.03    3.29
   3   1   8  111.21    3.34
   4  -1   8   26.48    1.31
  -4  -1  -8   26.35    1.29
  -4   1  -8   19.14    1.14
   4   1   8   26.53    1.30
   5  -1   8   45.03    1.92
  -5  -1  -8   48.76    1.97
   5   1   8   46.50    1.97
  -5   1  -8   44.25    1.89
  -6  -1  -8   23.09    1.39
   6  -1   8   23.06    1.38
   6   1   8   21.33    1.36
  -6   1  -8   21.64    1.31
   7  -1   8   42.85    2.02
  -7   1  -8   40.73    1.99
   7   1   8   41.25    2.03
   8  -1   8   10.16    1.17
   8   1   8   12.55    1.26
   9  -1   8    5.64    1.00
   9   1   8    2.68    0.79
  10  -1   8    7.01    1.14
  10   1   8    7.20    1.11
  11  -1   8    8.89    1.37
  11   1   8    9.81    1.41
  12  -1   8   19.18    1.93
  12   1   8   22.27    1.97
  13  -2  -8   21.02    1.99
  13   2  -8   17.54    1.75
  12  -2  -8    5.32    1.13
  12   2  -8    3.86    0.94
  11  -2  -8   17.49    1.56
  11   2  -8   17.85    1.45
  10  -2  -8    8.35    1.15
  10   2  -8    9.49    1.11
   9  -2  -8   90.63    3.63
   9  -2  -8   81.44    3.29
   9   2  -8   86.28    3.15
   9   2  -8   90.86    3.17
   8  -2  -8   -0.38    0.40
   8  -2  -8    0.18    0.53
   8   2  -8    0.98    0.49
   8   2  -8   -0.06    0.26
   7  -2  -8   56.78    2.38
   7  -2  -8   61.98    2.40
   7   2  -8   61.44    2.24
   7   2  -8   59.45    2.18
   6  -2  -8    0.86    0.42
  -6  -2   8    1.93    0.43
   6  -2  -8    1.77    0.53
   6   2  -8    1.43    0.38
  -6   2   8    1.56    0.47
   6   2  -8    0.70    0.38
   5  -2  -8   30.41    1.44
   5  -2  -8   30.85    1.43
  -5  -2   8   29.58    1.22
   5   2  -8   29.34    1.25
  -5   2   8   27.86    1.42
   5   2  -8   31.78    1.25
  -4  -2   8    3.13    0.40
   4  -2  -8    2.53    0.52
   4   2  -8    2.54    0.38
  -4   2   8    2.37    0.48
   4   2  -8    3.07    0.41
   3  -2  -8   38.83    1.56
   3  -2  -8   38.41    1.55
  -3  -2   8   39.05    1.32
  -3  -2   8   38.28    1.32
   3   2  -8   41.15    1.33
   3   2  -8   39.51    1.32
  -3   2   8   38.77    1.58
  -2  -2   8   13.79    0.63
   2  -2  -8   15.02    0.85
   2  -2  -8   14.75    0.90
  -2  -2   8   13.83    0.65
   2   2  -8   14.45    0.64
  -2   2   8   13.22    0.86
   2   2  -8   15.11    0.65
   1  -2  -8   52.39    1.89
   1  -2  -8   55.40    1.89
  -1  -2   8   52.63    1.64
  -1   2   8   53.12    1.91
   1   2  -8   55.59    1.63
   1   2  -8   52.74    1.65
   0  -2  -8    0.41    0.38
   0  -2   8    1.13    0.29
   0  -2  -8    0.29    0.30
   0   2  -8    1.33    0.31
   0   2  -8    0.72    0.25
   0   2   8    0.75    0.33
   0   2   8    1.01    0.36
  -1  -2  -8   54.79    1.96
   1  -2   8   55.89    1.79
  -1  -2  -8   55.12    1.94
  -1   2  -8   55.76    1.79
   1   2   8   55.48    1.97
  -2  -2  -8    0.41    0.29
   2  -2   8    1.40    0.37
  -2   2  -8    0.90    0.34
   2   2   8    0.86    0.41
  -3  -2  -8   24.88    1.24
   3  -2   8   26.89    1.23
   3   2   8   25.48    1.28
  -3   2  -8   26.13    1.19
   4  -2   8    8.82    0.83
  -4  -2  -8    9.82    0.93
   4   2   8    8.52    0.84
  -5  -2  -8    5.87    0.74
   5  -2   8    6.92    0.81
  -5   2  -8    6.34    0.74
   5   2   8    7.34    0.87
   6  -2   8   24.25    1.44
  -6  -2  -8   25.67    1.47
  -6   2  -8   21.88    1.33
   6   2   8   24.96    1.47
   7  -2   8    5.16    0.82
   7   2   8    5.04    0.82
  -7   2  -8    6.61    0.86
   8  -2   8    1.06    0.64
   8   2   8    1.04    0.60
   9  -2   8    1.30    0.73
   9   2   8    1.10    0.69
  10  -2   8   18.98    1.78
  10   2   8   22.01    1.77
  11  -2   8    1.28    0.83
  11   2   8    2.05    0.90
  12  -2   8    0.42    0.81
  12   2   8    0.39    0.82
  13  -3  -8   -0.47    0.78
  13   3  -8   -0.86    0.61
  12  -3  -8   -1.02    0.64
  12   3  -8    1.12    0.70
  11  -3  -8    2.51    0.85
  11   3  -8    3.91    0.88
  10  -3  -8    2.90    0.84
  10   3  -8    2.61    0.71
   9  -3  -8    5.68    0.98
   9   3  -8    6.92    0.87
   8  -3  -8   -0.20    0.40
   8  -3  -8    0.24    0.52
   8   3  -8   -0.31    0.30
   8   3  -8   -0.60    0.36
   7  -3  -8   26.30    1.51
   7  -3  -8   25.82    1.46
   7   3  -8   26.07    1.24
   7   3  -8   24.90    1.25
   6  -3  -8    0.86    0.48
  -6  -3   8    0.99    0.35
   6  -3  -8    0.89    0.48
   6   3  -8    1.02    0.39
   6   3  -8    1.29    0.36
  -6   3   8    1.41    0.51
   5  -3  -8  100.57    3.30
  -5  -3   8   96.98    2.92
   5  -3  -8   93.73    3.24
  -5   3   8   97.01    3.24
   5   3  -8  100.30    2.95
   5   3  -8   98.16    2.93
  -5   3   8   98.47    3.29
   4  -3  -8   11.69    0.96
   4  -3  -8   12.67    0.91
  -4  -3   8   11.74    0.64
  -4   3   8   12.19    0.95
   4   3  -8   12.24    0.64
  -4   3   8   11.94    0.87
   4   3  -8   12.06    0.66
  -3  -3   8   72.35    2.08
   3  -3  -8   69.62    2.46
   3  -3  -8   71.45    2.46
  -3   3   8   70.73    2.48
  -3   3   8   71.44    2.46
   3   3  -8   72.53    2.07
   3   3  -8   70.84    2.07
  -2  -3   8   99.50    2.70
  -2  -3   8   99.68    2.71
   2  -3  -8   96.29    3.12
   2   3  -8   97.64    2.69
   2   3  -8  101.77    2.71
  -2   3   8   97.02    3.14
  -2   3   8   99.22    3.12
  -1  -3   8   85.05    2.41
   1  -3  -8   84.66    2.81
  -1   3   8   87.14    2.82
  -1   3   8   87.71    2.79
   1   3  -8   87.03    2.40
   1   3  -8   89.41    2.42
   0  -3   8    2.94    0.33
   0  -3  -8    2.61    0.52
   0   3   8    2.91    0.50
   0   3  -8    3.20    0.33
   0   3   8    3.43    0.54
  -1  -3  -8  139.90    4.11
   1  -3   8  133.17    3.82
  -1  -3  -8  136.51    4.09
  -1   3  -8  140.01    3.85
   1   3   8  133.20    4.08
  -2  -3  -8    0.38    0.35
  -2  -3  -8    1.05    0.48
   2  -3   8   -0.38    0.27
   2   3   8   -0.16    0.35
  -2   3  -8   -0.05    0.25
   3  -3   8  184.69    5.34
  -3  -3  -8  192.02    5.51
   3   3   8  183.13    5.47
  -3   3  -8  189.11    5.35
   4  -3   8    2.49    0.52
  -4  -3  -8    3.96    0.65
  -4   3  -8    2.83    0.50
   4   3   8    2.32    0.53
   5  -3   8   22.43    1.28
  -5  -3  -8   21.97    1.29
  -5   3  -8   23.17    1.25
   5   3   8   21.24    1.33
   6  -3   8    7.25    0.91
   6   3   8    8.71    0.99
  -6   3  -8    7.42    0.87
   7  -3   8   69.73    2.82
   7   3   8   75.04    2.87
  -7   3  -8   70.47    2.79
   8  -3   8    3.31    0.82
   8   3   8    3.78    0.84
   9  -3   8   51.99    2.54
   9   3   8   52.53    2.58
  10  -3   8    7.45    1.23
  10   3   8    7.68    1.26
  11  -3   8    8.83    1.37
  11   3   8    8.62    1.28
  12  -3   8    0.97    0.82
  12   3   8    0.86    0.86
  12  -4  -8   18.19    1.88
  12   4  -8   17.13    1.50
  11  -4  -8    9.48    1.38
  11   4  -8   12.30    1.27
  10  -4  -8   33.20    2.10
  10   4  -8   31.98    1.71
   9  -4  -8   39.16    2.18
   9   4  -8   38.18    1.80
   9   4  -8   39.21    1.78
   8  -4  -8   74.85    3.03
   8   4  -8   74.37    2.63
   8   4  -8   73.02    2.60
   7  -4  -8   15.84    1.30
   7  -4  -8   15.86    1.25
   7   4  -8   15.63    0.93
  -7   4   8   15.97    1.30
   7   4  -8   15.98    0.98
   6  -4  -8   55.30    2.23
   6  -4  -8   51.15    2.23
  -6  -4   8   54.99    1.84
   6   4  -8   51.54    1.81
  -6   4   8   50.80    2.21
   6   4  -8   52.05    1.82
  -5  -4   8   15.87    0.77
   5  -4  -8   13.71    1.05
   5  -4  -8   14.83    1.14
  -5   4   8   16.20    1.07
   5   4  -8   14.42    0.75
  -5   4   8   15.50    1.14
   5   4  -8   12.69    0.71
   4  -4  -8   11.48    0.95
   4  -4  -8   12.47    0.96
  -4  -4   8   12.69    0.60
  -4   4   8   13.60    0.97
  -4   4   8   10.69    0.94
   4   4  -8   12.63    0.59
   4   4  -8   11.44    0.57
  -3  -4   8   15.00    0.57
   3  -4  -8   14.25    0.99
   3  -4  -8   13.97    1.01
  -3   4   8   15.92    1.00
   3   4  -8   14.91    0.55
  -3   4   8   16.90    1.06
   2  -4  -8   38.60    1.61
   2  -4  -8   35.05    1.58
  -2   4   8   37.78    1.57
  -2   4   8   37.41    1.61
   1  -4  -8   56.70    2.05
   1  -4  -8   53.93    2.04
  -1   4   8   51.53    2.01
  -1   4   8   55.62    2.02
   0  -4  -8  111.63    3.53
   0  -4  -8  115.60    3.55
   0  -4   8  110.32    3.09
   0   4   8  114.97    3.55
   0   4   8  111.77    3.54
   0   4  -8  111.98    3.08
  -1  -4  -8    3.66    0.59
   1  -4   8    3.64    0.39
  -1  -4  -8    3.62    0.60
  -1   4  -8    3.49    0.40
   1   4   8    2.71    0.53
   2  -4   8    9.60    0.68
  -2  -4  -8   10.03    0.85
  -2  -4  -8   11.48    0.99
   2   4   8    9.95    0.85
  -2   4  -8    9.31    0.65
   3  -4   8    6.18    0.64
  -3  -4  -8    6.27    0.74
   3   4   8    5.73    0.72
  -3   4  -8    6.55    0.65
   4  -4   8   34.65    1.54
  -4  -4  -8   36.95    1.68
  -4   4  -8   34.59    1.51
   4   4   8   33.63    1.61
   5  -4   8    0.64    0.45
   5   4   8    0.02    0.43
  -5   4  -8    0.22    0.36
   6  -4   8    1.89    0.60
  -6   4  -8    1.50    0.53
   6   4   8    1.58    0.58
   7  -4   8    1.77    0.66
   7   4   8    2.26    0.69
  -7   4  -8    1.65    0.55
   8  -4   8    0.17    0.57
   8   4   8   -0.16    0.55
   9  -4   8    9.19    1.20
   9   4   8    8.85    1.19
  10  -4   8    3.80    0.94
  10   4   8    5.55    1.10
  11  -4   8    1.96    0.88
  11   4   8    1.39    0.80
  12  -4   8    8.78    1.39
  12   4   8   12.62    1.66
  12  -5  -8   -0.84    0.72
  12   5  -8   -0.22    0.56
  11  -5  -8    2.37    0.90
  11   5  -8   -0.12    0.56
  10  -5  -8   13.91    1.58
  10   5  -8   14.85    1.18
   9  -5  -8   -0.55    0.57
   9   5  -8    0.47    0.48
   8  -5  -8   16.62    1.44
   8   5  -8   16.61    1.07
   8   5  -8   17.23    1.04
   7  -5  -8    1.76    0.67
   7   5  -8    2.11    0.41
  -7   5   8    2.39    0.70
   7   5  -8    2.00    0.46
   6  -5  -8   23.76    1.55
   6  -5  -8   29.20    1.78
  -6  -5   8   25.73    1.11
   6   5  -8   26.44    1.12
   6   5  -8   27.53    1.10
  -6   5   8   25.14    1.55
   5  -5  -8    2.02    0.56
   5  -5  -8    2.92    0.65
  -5  -5   8    2.93    0.36
   5   5  -8    2.44    0.34
  -5   5   8    3.31    0.68
   5   5  -8    2.91    0.34
   4  -5  -8    6.11    0.81
  -4  -5   8    8.73    0.44
   4  -5  -8   10.59    0.93
   4   5  -8    8.75    0.44
  -4   5   8    9.70    0.96
   4   5  -8    8.62    0.42
  -4   5   8    9.48    0.96
   3  -5  -8    0.14    0.38
   3  -5  -8   -0.02    0.40
  -3   5   8    0.04    0.39
  -3   5   8    0.12    0.34
   2  -5  -8   55.11    2.11
   2  -5  -8   54.92    2.10
  -2   5   8   52.98    2.10
  -2   5   8   52.83    2.06
   1  -5  -8    0.00    0.40
   1  -5  -8    0.06    0.37
  -1   5   8    0.31    0.36
  -1   5   8    0.54    0.41
   0  -5   8  222.11    6.01
   0  -5  -8  216.65    6.53
   0  -5  -8  243.41    6.61
   0   5   8  224.18    6.55
   0   5   8  231.01    6.60
   0   5  -8  234.81    6.00
  -1  -5  -8    4.43    0.65
  -1  -5  -8    4.49    0.65
   1  -5   8    3.66    0.40
  -1   5  -8    4.30    0.41
   1   5   8    4.13    0.64
  -2  -5  -8   38.74    1.72
  -2  -5  -8   39.36    1.73
   2  -5   8   40.46    1.47
   2   5   8   39.77    1.72
  -2   5  -8   41.33    1.45
   3  -5   8    0.75    0.37
  -3  -5  -8    0.53    0.48
  -3  -5  -8    0.44    0.42
   3   5   8    0.54    0.43
  -3   5  -8    0.28    0.31
  -4  -5  -8  174.11    5.29
   4  -5   8  166.86    5.06
  -4   5  -8  172.07    5.06
   4   5   8  174.93    5.28
   5  -5   8    0.49    0.45
  -5   5  -8    0.23    0.37
   5   5   8    0.09    0.44
   6  -5   8   27.26    1.57
  -6   5  -8   28.71    1.53
   6   5   8   27.54    1.62
   7  -5   8   17.58    1.37
  -7   5  -8   16.75    1.27
   7   5   8   17.32    1.36
   8  -5   8   83.75    3.26
   8   5   8   79.11    3.25
   9  -5   8   -0.73    0.58
   9   5   8   -0.70    0.54
  10  -5   8   53.09    2.75
  10   5   8   51.46    2.66
  11  -5   8    1.00    0.79
  11   5   8    0.74    0.83
  12  -5   8   13.66    1.71
  12   5   8   12.83    1.63
  12  -6  -8   19.90    1.98
  12   6  -8   19.65    1.53
  11  -6  -8   14.22    1.65
  11   6  -8   15.63    1.32
  10  -6  -8   40.71    2.38
  10   6  -8   40.58    1.90
   9  -6  -8   23.26    1.76
   9   6  -8   20.29    1.26
   8  -6  -8   38.56    2.15
   8   6  -8   35.47    1.54
   8   6  -8   36.62    1.58
   7  -6  -8   14.73    1.43
   7   6  -8   14.71    0.89
  -7   6   8   11.69    1.24
   7   6  -8   15.23    0.84
  -6  -6   8   10.64    0.68
   6  -6  -8   12.14    1.21
   6   6  -8    9.66    0.66
  -6   6   8   11.58    1.20
   6   6  -8   10.86    0.63
  -5  -6   8    1.68    0.27
   5  -6  -8    1.81    0.62
   5   6  -8    1.82    0.28
   5   6  -8    1.59    0.26
  -5   6   8    0.85    0.51
   4  -6  -8    4.97    0.72
   4  -6  -8    5.16    0.75
  -4   6   8    5.46    0.75
  -4   6   8    6.12    0.84
   3  -6  -8    8.45    0.89
   3  -6  -8   10.44    1.03
  -3   6   8    9.04    0.95
  -3   6   8   10.58    1.04
   2  -6  -8   -0.36    0.39
   2  -6  -8   -0.49    0.35
  -2   6   8   -0.08    0.35
  -2   6   8    0.29    0.41
   1  -6  -8   51.23    2.06
   1  -6  -8   51.08    2.07
  -1   6   8   51.11    2.10
  -1   6   8   52.07    2.05
   0  -6   8   52.28    1.54
   0  -6  -8   53.74    2.11
   0  -6  -8   52.51    2.10
   0  -6   8   52.64    1.55
   0   6   8   53.60    2.12
   0   6   8   55.14    2.12
   1  -6   8   34.18    1.22
  -1  -6  -8   33.86    1.62
  -1  -6  -8   33.62    1.62
   1  -6   8   36.31    1.23
   1   6   8   35.80    1.65
  -1   6  -8   35.00    1.20
   2  -6   8    0.89    0.31
  -2  -6  -8    0.64    0.43
  -2  -6  -8    1.14    0.50
  -2   6  -8    0.85    0.30
   2   6   8    0.57    0.44
   3  -6   8    4.95    0.61
  -3  -6  -8    5.99    0.92
  -3  -6  -8    5.60    0.79
   3   6   8    4.59    0.69
  -3   6  -8    5.64    0.60
   4  -6   8    0.06    0.37
  -4  -6  -8   -0.94    0.48
  -4   6  -8    0.18    0.31
   4   6   8   -0.30    0.39
   5  -6   8    4.71    0.74
   5   6   8    4.30    0.75
   6  -6   8   28.75    1.62
   6   6   8   28.24    1.67
  -6   6  -8   29.98    1.56
   7  -6   8    1.76    0.66
   7   6   8    0.80    0.63
  -7   6  -8    1.02    0.53
   8  -6   8    0.61    0.63
   8   6   8   -0.03    0.56
   9  -6   8    0.31    0.63
   9   6   8    0.23    0.67
  10  -6   8    2.97    0.98
  10   6   8    3.04    0.95
  11  -6   8   -0.55    0.72
  11   6   8    0.75    0.73
  12   7  -8    0.96    0.68
  11  -7  -8    0.87    0.83
  11   7  -8    0.84    0.59
  10  -7  -8    2.31    0.91
  10   7  -8    1.81    0.61
   9  -7  -8    6.07    1.14
   9   7  -8    6.15    0.75
   8  -7  -8    3.63    0.89
   8   7  -8    2.43    0.52
   7  -7  -8   15.85    1.46
  -7   7   8   16.01    1.53
   7   7  -8   16.02    0.88
   7   7  -8   15.34    0.84
  -6  -7   8    1.52    0.33
   6  -7  -8    0.55    0.59
   6   7  -8    1.96    0.30
  -6   7   8    1.83    0.66
   6   7  -8    1.73    0.34
   5  -7  -8   -0.60    0.47
  -5   7   8   -0.40    0.45
   4  -7  -8    4.00    0.78
  -4   7   8    5.55    0.83
   3  -7  -8   19.64    1.33
  -3   7   8   17.12    1.27
  -3   7   8   18.44    1.24
   2  -7  -8   12.60    1.08
  -2   7   8   12.79    1.05
  -2   7   8   12.48    1.02
   1  -7  -8    6.14    0.83
   1  -7  -8    7.34    0.84
  -1   7   8    6.25    0.83
  -1   7   8    5.93    0.76
   0  -7  -8   17.85    1.17
   0  -7   8   14.85    0.61
   0  -7  -8   18.40    1.22
   0  -7   8   14.92    0.61
   0   7   8   17.47    1.19
   0   7   8   15.39    1.11
  -1  -7  -8   25.58    1.43
   1  -7   8   26.02    1.00
   1  -7   8   25.09    1.01
   1   7   8   23.77    1.39
  -1   7  -8   25.95    0.96
  -2  -7  -8    6.39    0.84
   2  -7   8    6.86    0.60
   2  -7   8    5.05    0.57
   2   7   8    5.85    0.80
  -2   7  -8    6.69    0.60
  -3  -7  -8  108.02    3.68
   3  -7   8  113.32    3.42
   3  -7   8  109.60    3.42
   3   7   8  105.91    3.67
  -3   7  -8  109.39    3.36
   4  -7   8    1.96    0.52
  -4  -7  -8    0.94    0.57
  -4   7  -8    1.62    0.44
   4   7   8    1.93    0.61
   5  -7   8   32.60    1.65
  -5  -7  -8   36.94    1.97
   5   7   8   30.49    1.71
   6  -7   8    5.49    0.85
   6   7   8    5.19    0.92
  -6   7  -8    6.13    0.83
   7  -7   8   39.49    2.04
   7   7   8   40.92    2.12
  -7   7  -8   35.86    1.90
   8  -7   8   -0.25    0.55
   8   7   8    0.05    0.63
   9  -7   8   42.49    2.36
   9   7   8   42.93    2.38
  10  -7   8    1.88    0.88
  10   7   8    2.65    0.89
  11  -7   8   13.92    1.68
  11   7   8   15.64    1.74
  11  -8  -8   25.74    2.24
  11   8  -8   28.26    1.57
  10  -8  -8    0.78    0.79
  10   8  -8   -0.13    0.46
   9  -8  -8   25.45    1.98
   9   8  -8   22.98    1.26
   8  -8  -8    0.98    0.73
   8   8  -8   -0.02    0.36
   7  -8  -8   23.11    1.80
  -7   8   8   23.75    1.71
   7   8  -8   24.79    1.04
   7   8  -8   24.38    1.07
  -6  -8   8   15.22    0.74
   6  -8  -8   16.03    1.51
   6   8  -8   16.32    0.73
   6   8  -8   16.27    0.69
  -6   8   8   18.93    1.51
   5  -8  -8   19.77    1.52
  -5   8   8   17.45    1.39
   4  -8  -8   18.24    1.37
  -4   8   8   19.34    1.40
   3  -8  -8   17.82    1.35
  -3   8   8   19.83    1.32
  -3   8   8   17.67    1.31
   2  -8  -8   23.22    1.45
  -2   8   8   23.57    1.46
  -2   8   8   27.96    1.49
   1  -8  -8    3.70    0.74
  -1   8   8    6.17    0.84
  -1   8   8    4.59    0.76
   0  -8   8    1.26    0.24
   0  -8   8    1.13    0.23
   0  -8  -8    1.23    0.55
   0   8   8    1.31    0.56
   0   8   8    1.65    0.55
   1  -8   8   26.47    1.05
  -1  -8  -8   23.08    1.44
   1  -8   8   25.08    1.01
  -1   8  -8   25.52    0.97
   1   8   8   27.73    1.53
  -2  -8  -8    0.68    0.52
   2  -8   8   -0.13    0.26
   2  -8   8   -0.20    0.31
   2   8   8   -0.30    0.42
  -2   8  -8    0.31    0.26
   3  -8   8    2.49    0.51
  -3  -8  -8    2.49    0.66
  -3   8  -8    2.39    0.44
   3   8   8    1.99    0.64
  -4  -8  -8    0.92    0.57
   4  -8   8    1.38    0.49
  -4   8  -8    0.65    0.37
   4   8   8    1.03    0.55
   5  -8   8    3.85    0.69
  -5  -8  -8    4.72    0.85
   5   8   8    5.78    0.92
   6  -8   8   37.14    1.89
  -6  -8  -8   34.80    2.10
  -6   8  -8   38.10    1.82
   6   8   8   37.62    1.99
   7  -8   8    6.19    0.99
  -7   8  -8    5.98    0.91
   7   8   8    5.06    1.00
   8  -8   8    0.26    0.66
   8   8   8    0.82    0.66
   9  -8   8    0.34    0.68
   9   8   8    0.42    0.66
  10  -8   8    3.21    0.94
  10   8   8    1.12    0.83
  11  -8   8    5.09    1.18
  11   8   8    7.07    1.30
  10  -9  -8    0.28    0.82
  10   9  -8    0.00    0.44
   9  -9  -8    8.40    1.33
   9   9  -8    7.15    0.75
   8  -9  -8    2.31    0.87
   8   9  -8    1.56    0.44
   7  -9  -8    0.73    0.77
   7   9  -8    1.05    0.32
  -7   9   8    1.20    0.67
   6  -9  -8    1.11    0.74
  -6   9   8    3.50    0.86
   5  -9  -8   -0.57    0.58
  -5   9   8   -0.94    0.43
   4  -9  -8   13.13    1.31
  -4   9   8   10.13    1.14
   3  -9  -8    1.97    0.70
  -3   9   8    1.84    0.65
   2  -9  -8   52.66    2.34
  -2   9   8   53.23    2.31
  -2   9   8   54.06    2.37
   1  -9  -8   14.15    1.19
  -1   9   8   13.14    1.16
  -1   9   8   12.91    1.15
   0  -9   8   11.84    0.56
   0  -9  -8   11.02    1.13
   0  -9   8   10.94    0.57
   0   9   8   10.88    1.12
   0   9   8    9.17    1.01
   1  -9   8    1.78    0.34
   1  -9   8    2.05    0.37
  -1  -9  -8    1.20    0.58
  -1   9  -8    2.15    0.33
   1   9   8    1.69    0.60
  -2  -9  -8   36.09    1.85
   2  -9   8   35.40    1.46
   2  -9   8   37.52    1.48
  -2   9  -8   36.13    1.38
   2   9   8   38.88    1.92
  -3  -9  -8   11.49    1.18
   3  -9   8   12.15    0.93
   3   9   8   11.68    1.18
  -3   9  -8   11.45    0.81
  -4  -9  -8   24.12    1.56
   4  -9   8   21.26    1.30
  -4   9  -8   21.99    1.19
   4   9   8   19.89    1.46
  -5  -9  -8    4.69    0.89
   5  -9   8    3.72    0.72
   5   9   8    5.27    0.90
  -6  -9  -8   81.33    3.29
   6  -9   8   78.41    3.10
   6   9   8   85.34    3.32
   7  -9   8    1.72    0.72
  -7  -9  -8    0.59    0.81
   7   9   8    1.00    0.69
   8  -9   8   12.24    1.36
   8   9   8   12.37    1.42
   9  -9   8    7.58    1.20
   9   9   8    8.42    1.29
  10  -9   8   31.72    2.28
  10   9   8   31.90    2.22
  10 -10  -8   17.25    1.86
  10  10  -8   18.56    1.18
   9 -10  -8    2.08    0.93
   9  10  -8    1.15    0.45
   8 -10  -8    5.80    1.16
   8  10  -8    5.36    0.55
   7 -10  -8    1.21    0.83
  -7  10   8    3.49    0.92
   6 -10  -8   60.83    2.88
  -6  10   8   60.04    2.82
   5 -10  -8   -0.45    0.62
  -5  10   8    1.09    0.71
   4 -10  -8    8.53    1.10
  -4  10   8    8.02    1.04
   3 -10  -8    0.39    0.61
  -3  10   8    0.33    0.57
   2 -10  -8    3.81    0.79
  -2  10   8    6.05    0.93
   1 -10  -8   -0.13    0.51
  -1  10   8    0.38    0.55
  -1  10   8    0.47    0.52
   0 -10  -8    5.37    0.88
   0 -10   8    4.97    0.43
   0 -10   8    3.63    0.38
   0  10   8    3.96    0.82
   0  10   8    4.01    0.87
  -1 -10  -8    2.63    0.73
   1 -10   8    4.47    0.50
   1 -10   8    3.92    0.49
   1  10   8    4.31    0.82
  -1  10  -8    3.18    0.40
   2 -10   8    0.21    0.34
  -2 -10  -8    0.35    0.60
  -2  10  -8    0.38    0.27
   2  10   8   -0.38    0.52
  -3 -10  -8    0.15    0.57
   3 -10   8    1.90    0.50
  -3  10  -8    1.68    0.43
   3  10   8    1.45    0.60
   4 -10   8    0.29    0.44
  -4 -10  -8    0.03    0.56
   4  10   8    0.00    0.52
  -4  10  -8    0.29    0.37
  -5 -10  -8   22.15    1.62
   5 -10   8   19.75    1.41
   5  10   8   21.26    1.59
   6 -10   8    0.78    0.57
  -6 -10  -8    0.31    0.68
   6  10   8    1.62    0.72
   7 -10   8   -1.27    0.49
  -7 -10  -8    0.30    0.71
   7  10   8    1.00    0.72
   8 -10   8    5.42    1.01
  -8 -10  -8    4.03    1.04
   8  10   8    6.52    1.13
  -9 -10  -8   -2.98    0.96
   9  10   8    0.73    0.75
   9 -11  -8    0.54    0.91
   8 -11  -8    2.93    1.03
   7 -11  -8    0.86    0.82
  -7  11   8    2.86    0.89
   6 -11  -8    7.71    1.22
  -6  11   8    6.48    1.10
   5 -11  -8    2.02    0.85
  -5  11   8    1.04    0.70
   4 -11  -8   21.26    1.71
  -4  11   8   19.49    1.61
   3 -11  -8   11.51    1.32
  -3  11   8   10.57    1.23
   2 -11  -8    3.46    0.85
  -2  11   8    2.24    0.73
   1 -11  -8    8.90    1.12
  -1  11   8    7.43    1.04
   0 -11   8    8.85    0.58
   0 -11   8    8.46    0.58
   0 -11  -8    7.43    1.01
   0  11   8    9.54    1.15
   1 -11   8    6.60    0.62
  -1 -11  -8    6.38    0.99
  -1  11  -8    5.55    0.53
   1  11   8    6.95    1.04
   2 -11   8   28.26    1.31
  -2 -11  -8   28.11    1.76
   2  11   8   27.06    1.73
  -2  11  -8   25.70    1.19
   3 -11   8   31.09    1.50
  -3 -11  -8   29.95    1.84
   3  11   8   30.17    1.88
   4 -11   8   49.33    2.12
  -4 -11  -8   52.32    2.48
   4  11   8   48.48    2.41
  -5 -11  -8   18.76    1.56
   5  11   8   16.19    1.58
  -6 -11  -8   25.29    1.83
   6  11   8   23.04    1.75
  -7 -11  -8   15.00    1.62
   7  11   8   15.47    1.59
  -8 -11  -8   10.82    1.44
   8  11   8   13.84    1.58
   9  11   8    3.49    0.98
   8 -12  -8    4.64    1.17
   7 -12  -8   20.39    1.98
  -7  12   8   18.62    1.83
   6 -12  -8    3.36    1.01
  -6  12   8    4.12    1.01
   5 -12  -8   10.94    1.40
  -5  12   8   10.24    1.30
   4 -12  -8    2.83    0.93
  -4  12   8    2.96    0.83
   3 -12  -8   23.47    1.78
  -3  12   8   19.92    1.60
   2 -12  -8    1.44    0.74
  -2  12   8    0.91    0.70
   1 -12  -8    3.21    0.88
  -1  12   8    4.52    0.93
   0 -12  -8    5.45    0.92
   0  12   8    3.00    0.81
  -1 -12  -8    7.09    1.06
   1  12   8    5.79    0.99
  -2 -12  -8    4.24    0.94
   2  12   8    3.28    0.84
  -3 -12  -8    0.01    0.65
   3  12   8    0.03    0.60
  -4 -12  -8    0.36    0.66
   4  12   8   -0.03    0.65
  -5 -12  -8    0.27    0.71
   5  12   8    0.44    0.71
  -6 -12  -8    0.06    0.72
   6  12   8    0.69    0.73
   7  12   8    0.54    0.72
   8  12   8    0.44    0.72
   7 -13  -8    2.78    1.06
  -7  13   8    4.00    1.10
   6 -13  -8    1.18    0.88
  -6  13   8   -0.83    0.64
   5 -13  -8   13.65    1.60
  -5  13   8   12.28    1.50
   4 -13  -8    0.52    0.77
  -4  13   8    0.91    0.72
   3 -13  -8    3.57    0.95
  -3  13   8    5.01    0.96
   2 -13  -8    2.74    0.87
  -2  13   8    4.86    1.01
   1 -13  -8   20.45    1.67
  -1  13   8   19.92    1.67
   0 -13  -8    6.02    1.07
   0  13   8    6.30    1.05
  -1 -13  -8   27.22    1.86
   1  13   8   26.87    1.84
  -2 -13  -8    3.26    0.88
   2  13   8    3.12    0.87
  -3 -13  -8   22.65    1.78
   3  13   8   22.79    1.71
  -4 -13  -8    5.28    1.06
   4  13   8    6.38    1.13
  -5 -13  -8   17.65    1.73
   5  13   8   23.89    1.83
   6  13   8    2.99    0.95
   7  13   8   24.52    1.95
   6 -14  -8   10.89    1.59
  -6  14   8   13.53    1.62
   5 -14  -8    2.36    1.01
  -5  14   8    2.94    0.97
   4 -14  -8    3.08    0.98
  -4  14   8    3.23    1.00
   3 -14  -8    6.28    1.17
  -3  14   8    5.73    1.08
   2 -14  -8   16.66    1.68
  -2  14   8   14.54    1.57
   1 -14  -8   -0.23    0.66
  -1  14   8    0.85    0.71
   0 -14  -8    5.34    1.07
   0  14   8    6.98    1.15
  -1 -14  -8    1.24    0.84
   1  14   8    2.67    0.85
  -2 -14  -8    1.56    0.83
   2  14   8    1.32    0.71
   3  14   8   -0.97    0.57
   4  14   8   -0.33    0.65
   5  14   8    4.63    1.07
   3 -15  -8   -0.61    0.79
  -3  15   8    0.50    0.70
  -2  15   8    8.82    1.33
  -1  15   8   -0.45    0.63
   0  15   8   16.80    1.72
   1  15   8    0.73    0.76
   2  15   8    5.85    1.14
   3  15   8    0.35    0.69
  13   0  -9    1.50    0.91
  12   0  -9   -0.67    0.63
  11   0  -9    1.70    0.76
  10   0  -9   -0.38    0.53
  10   0  -9   -0.03    0.47
   9   0  -9   18.88    1.41
   9   0  -9   21.75    1.38
   8   0  -9   -0.62    0.32
   8   0  -9    0.17    0.48
   7   0  -9   26.31    1.43
   7   0  -9   28.19    1.41
   6   0  -9   -0.05    0.30
  -6   0   9    0.67    0.35
   6   0  -9    0.08    0.38
  -5   0   9    8.16    0.72
  -5   0   9    7.05    0.70
   5   0  -9    7.56    0.74
   5   0  -9    7.78    0.74
  -4   0   9   -0.29    0.26
   4   0  -9   -0.38    0.28
   4   0  -9   -0.15    0.27
  -4   0   9    0.26    0.30
   3   0  -9  166.24    4.74
  -3   0   9  167.42    4.73
   3   0  -9  165.30    4.73
  -3   0   9  166.48    4.74
   2   0  -9    0.13    0.29
  -2   0   9   -0.11    0.27
   2   0  -9   -0.10    0.27
  -2   0   9   -0.29    0.23
  -1   0   9   68.47    2.12
  -1   0   9   63.39    2.13
   1   0  -9   64.90    2.14
   1   0  -9   65.51    2.11
   0   0  -9    0.01    0.29
   0   0  -9    0.40    0.29
   0   0   9    0.01    0.26
  -1   0  -9   -0.25    0.29
   1   0   9    0.38    0.30
   2   0   9    0.15    0.32
  -2   0  -9   -0.11    0.26
  -4   0  -9    0.06    0.35
   4   0   9   -0.36    0.36
  -5   0  -9  112.68    3.67
   5   0   9  107.96    3.64
   6   0   9    0.09    0.45
  -6   0  -9    0.04    0.40
   7   0   9   53.71    2.38
   8   0   9   -0.14    0.56
   9   0   9   10.21    1.29
  10   0   9    0.00    0.68
  11   0   9   48.33    2.65
  12   0   9   -0.02    0.75
  13  -1  -9    5.52    1.18
  13   1  -9    8.66    1.30
  12  -1  -9    8.86    1.30
  12   1  -9   11.26    1.38
  11  -1  -9   17.17    1.63
  11   1  -9   19.40    1.52
  10  -1  -9    4.32    0.92
  10   1  -9    4.13    0.86
   9  -1  -9   17.89    1.35
   9  -1  -9   17.22    1.39
   9   1  -9   19.59    1.28
   9   1  -9   17.14    1.30
   8  -1  -9   14.43    1.22
   8  -1  -9   16.57    1.20
   8   1  -9   14.25    1.05
   8   1  -9   14.78    1.13
   7  -1  -9   16.04    1.16
   7  -1  -9   16.66    1.11
   7   1  -9   16.53    1.09
   7   1  -9   15.49    1.00
   6  -1  -9    2.10    0.52
   6  -1  -9    3.36    0.58
  -6  -1   9    2.66    0.49
   6   1  -9    3.79    0.55
   6   1  -9    3.12    0.53
  -6   1   9    3.06    0.58
   5  -1  -9   16.04    1.04
  -5  -1   9   14.85    0.89
   5   1  -9   16.43    0.92
  -5   1   9   15.75    0.99
  -5   1   9   15.96    1.03
   5   1  -9   18.40    0.97
   4  -1  -9   14.83    0.90
  -4  -1   9   13.98    0.80
  -4  -1   9   13.92    0.81
   4  -1  -9   13.81    0.92
  -4   1   9   14.71    0.93
  -4   1   9   12.87    0.88
   4   1  -9   14.20    0.83
   4   1  -9   14.15    0.81
  -3  -1   9    1.48    0.34
   3  -1  -9    1.83    0.44
  -3  -1   9    1.40    0.33
   3  -1  -9    1.41    0.39
   3   1  -9    1.67    0.37
   3   1  -9    1.97    0.39
  -3   1   9    1.58    0.42
  -3   1   9    2.59    0.46
   2  -1  -9   31.89    1.34
  -2  -1   9   31.86    1.22
   2  -1  -9   33.94    1.37
  -2  -1   9   32.92    1.22
  -2   1   9   32.06    1.34
   2   1  -9   33.91    1.23
   2   1  -9   33.63    1.25
  -2   1   9   33.92    1.35
   1  -1  -9    1.85    0.40
  -1  -1   9    1.72    0.34
   1  -1  -9    1.51    0.41
  -1   1   9    2.40    0.44
  -1   1   9    2.02    0.42
   1   1  -9    1.94    0.37
   1   1  -9    1.78    0.34
   0  -1  -9    7.50    0.64
   0  -1   9    6.15    0.54
   0  -1  -9    7.87    0.70
   0   1  -9    7.03    0.61
   0   1  -9    6.12    0.55
   0   1   9    6.10    0.63
   1  -1   9    3.27    0.45
  -1  -1  -9    3.07    0.47
  -1  -1  -9    3.61    0.52
  -1   1  -9    2.89    0.44
   1   1   9    3.30    0.52
   2  -1   9   22.05    1.06
   2   1   9   21.76    1.12
  -2   1  -9   22.41    1.06
   3  -1   9   28.13    1.30
  -3  -1  -9   27.05    1.32
  -3   1  -9   24.79    1.23
   3   1   9   27.17    1.31
   4  -1   9   12.12    0.95
  -4  -1  -9   11.21    0.89
   4   1   9   12.66    0.97
  -4   1  -9   11.93    0.88
   5  -1   9    7.41    0.86
  -5  -1  -9    6.07    0.75
   5   1   9    5.37    0.73
  -5   1  -9    5.81    0.75
  -6  -1  -9   14.92    1.16
   6  -1   9   13.98    1.15
   6   1   9   15.48    1.23
  -6   1  -9   13.40    1.06
   7  -1   9   10.95    1.15
   7   1   9   12.14    1.23
   8  -1   9    8.28    1.12
   8   1   9    7.50    1.05
   9  -1   9   44.88    2.40
   9   1   9   46.68    2.38
  10  -1   9    6.19    1.12
  10   1   9    4.27    1.03
  11  -1   9    8.66    1.37
  11   1   9    8.36    1.37
  12  -1   9    9.22    1.43
  12   1   9   10.62    1.51
  13  -2  -9    3.73    1.07
  13   2  -9    4.39    1.06
  12  -2  -9    0.46    0.74
  12   2  -9   -0.17    0.62
  11  -2  -9    4.35    0.97
  11   2  -9    2.99    0.80
  10  -2  -9   50.86    2.48
  10   2  -9   49.00    2.28
   9  -2  -9   20.45    1.63
   9  -2  -9   20.86    1.53
   9   2  -9   16.99    1.23
   9   2  -9   19.99    1.36
   8  -2  -9   24.78    1.48
   8  -2  -9   21.72    1.49
   8   2  -9   23.38    1.34
   7  -2  -9    4.08    0.68
   7  -2  -9    3.23    0.67
   7   2  -9    4.66    0.64
   7   2  -9    4.62    0.66
   6  -2  -9   71.26    2.60
   6  -2  -9   68.37    2.61
  -6  -2   9   74.08    2.39
   6   2  -9   70.23    2.39
   6   2  -9   70.59    2.41
  -6   2   9   69.49    2.61
   5  -2  -9    4.41    0.65
  -5  -2   9    4.24    0.53
   5  -2  -9    4.74    0.69
   5   2  -9    4.82    0.55
   5   2  -9    5.02    0.54
  -5   2   9    5.02    0.60
  -5   2   9    5.00    0.70
  -4  -2   9   40.99    1.45
  -4  -2   9   41.49    1.45
   4  -2  -9   42.46    1.71
  -4   2   9   35.47    1.57
   4   2  -9   43.95    1.47
  -4   2   9   38.79    1.68
   4   2  -9   40.79    1.45
  -3  -2   9    3.71    0.42
   3  -2  -9    4.01    0.60
   3  -2  -9    3.41    0.54
  -3  -2   9    4.53    0.44
  -3   2   9    4.26    0.58
   3   2  -9    3.54    0.42
   3   2  -9    3.90    0.44
   2  -2  -9   45.02    1.78
   2  -2  -9   48.21    1.78
  -2  -2   9   47.12    1.52
  -2  -2   9   47.83    1.52
   2   2  -9   46.99    1.51
  -2   2   9   45.69    1.78
   2   2  -9   48.44    1.52
  -1  -2   9   11.30    0.61
   1  -2  -9   11.39    0.81
   1  -2  -9   10.64    0.77
   1   2  -9   10.77    0.59
   1   2  -9   11.58    0.63
  -1   2   9   10.72    0.80
   0  -2  -9   38.41    1.54
   0  -2   9   40.59    1.37
   0  -2  -9   41.32    1.61
   0   2  -9   39.49    1.38
   0   2   9   39.21    1.59
   0   2  -9   38.66    1.35
  -1  -2  -9    8.16    0.76
   1  -2   9    8.27    0.61
  -1   2  -9    7.51    0.60
   1   2   9    7.93    0.71
  -2  -2  -9  126.00    3.85
   2  -2   9  123.58    3.70
  -2   2  -9  129.27    3.72
   2   2   9  123.90    3.84
  -3  -2  -9   -0.18    0.33
   3  -2   9    0.06    0.33
   3   2   9   -0.31    0.36
  -3   2  -9    0.24    0.30
   4  -2   9   95.51    3.20
  -4  -2  -9   96.33    3.26
   4   2   9  101.62    3.32
  -5  -2  -9   22.33    1.30
   5  -2   9   17.47    1.22
   5   2   9   21.86    1.32
  -5   2  -9   20.23    1.21
   6  -2   9   72.90    2.83
  -6   2  -9   79.09    2.84
   6   2   9   74.25    2.86
   7  -2   9    7.62    0.99
   7   2   9   11.41    1.18
  -7   2  -9    8.04    1.00
   8  -2   9   23.39    1.63
   8   2   9   28.11    1.78
   9  -2   9    4.92    0.99
   9   2   9    4.95    1.01
  10  -2   9   24.02    1.90
  10   2   9   24.41    1.84
  11  -2   9    2.21    0.94
  11   2   9    1.84    0.91
  12  -2   9   10.82    1.60
  12   2   9   11.82    1.57
  12  -3  -9   14.54    1.64
  12   3  -9   13.17    1.39
  11  -3  -9    0.16    0.67
  11   3  -9    0.51    0.63
  10  -3  -9   37.12    2.16
  10   3  -9   35.04    1.82
   9  -3  -9   16.09    1.40
   9   3  -9   14.46    1.17
   8  -3  -9   27.70    1.65
   8  -3  -9   26.60    1.59
   8   3  -9   26.22    1.38
   8   3  -9   26.31    1.34
   7  -3  -9   12.34    1.17
   7  -3  -9   12.03    1.08
  -7   3   9   13.03    1.15
   7   3  -9   14.02    0.89
   7   3  -9   12.69    0.92
   6  -3  -9    3.64    0.65
   6  -3  -9    4.21    0.72
  -6  -3   9    4.09    0.53
  -6   3   9    3.52    0.66
   6   3  -9    2.51    0.46
   6   3  -9    3.19    0.48
  -5  -3   9    5.72    0.55
   5  -3  -9    6.28    0.78
   5  -3  -9    3.83    0.62
  -5   3   9    5.42    0.69
   5   3  -9    5.30    0.53
  -5   3   9    4.58    0.69
   5   3  -9    5.79    0.55
   4  -3  -9    0.08    0.35
   4  -3  -9    0.13    0.38
  -4  -3   9    0.29    0.23
  -4   3   9   -0.33    0.27
   4   3  -9   -0.05    0.21
   4   3  -9    0.10    0.23
  -4   3   9    0.22    0.38
   3  -3  -9    1.89    0.48
   3  -3  -9    1.60    0.47
  -3  -3   9    1.75    0.27
  -3  -3   9    1.75    0.29
  -3   3   9    1.46    0.41
   3   3  -9    1.86    0.29
  -3   3   9    1.67    0.47
   3   3  -9    1.70    0.28
   2  -3  -9    7.82    0.79
  -2  -3   9    5.93    0.41
   2  -3  -9    7.14    0.77
   2   3  -9    6.31    0.41
  -2   3   9    6.31    0.71
  -2   3   9    6.48    0.67
   2   3  -9    6.81    0.43
   1  -3  -9   26.00    1.24
   1  -3  -9   26.85    1.29
  -1  -3   9   25.54    0.93
   1   3  -9   26.01    0.92
   1   3  -9   26.75    0.94
  -1   3   9   26.90    1.32
  -1   3   9   26.71    1.28
   0  -3   9   20.62    0.86
   0  -3  -9   21.13    1.18
   0  -3  -9   20.27    1.11
   0   3  -9   23.21    0.88
   0   3   9   23.16    1.22
   0   3  -9   22.41    0.91
   0   3   9   22.33    1.19
   1  -3   9    0.38    0.26
  -1  -3  -9   -0.21    0.37
  -1  -3  -9    0.36    0.36
   1   3   9   -0.11    0.33
  -1   3  -9    0.47    0.27
  -2  -3  -9    0.64    0.49
   2  -3   9    0.34    0.30
  -2  -3  -9    0.04    0.35
  -2   3  -9    0.47    0.29
   2   3   9    0.41    0.41
  -3  -3  -9    5.12    0.71
   3  -3   9    4.56    0.60
  -3   3  -9    5.89    0.63
   3   3   9    5.10    0.69
  -4  -3  -9   19.37    1.20
   4  -3   9   18.88    1.13
   4   3   9   18.45    1.19
   5  -3   9    0.26    0.41
  -5  -3  -9    0.47    0.44
   5   3   9    0.97    0.52
  -5   3  -9    0.31    0.35
   6  -3   9    7.11    0.89
   6   3   9    6.84    0.89
  -6   3  -9    8.53    0.93
   7  -3   9    3.84    0.77
  -7   3  -9    5.02    0.81
   7   3   9    3.59    0.79
   8  -3   9   63.04    2.72
   8   3   9   61.12    2.71
   9  -3   9   13.27    1.44
   9   3   9   11.88    1.42
  10  -3   9   28.71    1.97
  10   3   9   29.36    2.02
  11  -3   9    5.37    1.18
  11   3   9    5.94    1.15
  12  -3   9   20.30    2.04
  12   3   9   15.12    1.81
  12  -4  -9    0.62    0.75
  12   4  -9    1.75    0.73
  11  -4  -9    9.44    1.34
  11   4  -9    9.08    1.10
  10  -4  -9    8.49    1.19
  10   4  -9    9.21    1.06
   9  -4  -9   41.24    2.21
   9   4  -9   41.25    1.87
   8  -4  -9   36.94    1.99
   8   4  -9   36.28    1.59
   8   4  -9   36.00    1.62
   7  -4  -9   16.11    1.22
   7  -4  -9   13.50    1.28
   7   4  -9   12.60    0.85
  -7   4   9   14.40    1.31
   7   4  -9   12.66    0.90
  -6  -4   9   59.15    2.02
   6  -4  -9   65.22    2.49
   6  -4  -9   60.90    2.50
   6   4  -9   59.17    2.02
   6   4  -9   60.44    2.04
  -6   4   9   61.27    2.49
  -5  -4   9   54.83    1.80
   5  -4  -9   57.50    2.32
   5  -4  -9   53.63    2.22
   5   4  -9   58.34    1.81
  -5   4   9   57.73    2.31
   5   4  -9   55.58    1.81
  -4  -4   9    2.79    0.33
   4  -4  -9    1.92    0.53
   4  -4  -9    1.77    0.53
  -4   4   9    2.01    0.52
  -4   4   9    2.03    0.48
   4   4  -9    1.76    0.29
   4   4  -9    2.50    0.30
   3  -4  -9  115.67    3.63
  -3  -4   9  109.79    3.02
   3  -4  -9  111.38    3.61
  -3   4   9  111.11    3.63
   3   4  -9  112.46    3.01
   3   4  -9  106.69    2.99
  -3   4   9  114.81    3.60
   2  -4  -9   24.81    1.30
   2  -4  -9   25.10    1.31
  -2   4   9   23.57    1.29
  -2   4   9   26.84    1.30
  -1  -4   9  129.06    3.51
   1  -4  -9  133.03    4.06
   1  -4  -9  136.48    4.10
  -1   4   9  125.91    4.05
   1   4  -9  130.10    3.50
   1   4  -9  132.61    3.50
  -1   4   9  131.20    4.05
   0  -4   9   15.95    0.69
   0  -4  -9   17.11    1.05
   0  -4  -9   16.29    1.07
   0   4   9   19.44    1.15
   0   4   9   14.00    1.01
   0   4  -9   15.97    0.68
  -1  -4  -9  143.31    4.25
   1  -4   9  132.96    3.84
  -1  -4  -9  136.32    4.21
  -1   4  -9  138.57    3.86
   1   4   9  134.68    4.21
  -2  -4  -9    3.62    0.63
   2  -4   9    3.39    0.46
  -2  -4  -9    2.67    0.60
   2   4   9    3.52    0.60
  -2   4  -9    3.55    0.45
   3  -4   9   48.79    1.82
  -3  -4  -9   48.49    2.01
  -3   4  -9   49.42    1.81
   3   4   9   47.98    1.99
   4  -4   9   79.85    2.74
  -4  -4  -9   77.52    2.86
   4   4   9   76.84    2.86
  -4   4  -9   85.33    2.75
   5  -4   9   85.72    2.99
   5   4   9   84.39    3.08
  -5   4  -9   82.85    2.94
   6  -4   9   32.63    1.70
  -6   4  -9   35.68    1.72
   6   4   9   32.80    1.77
   7  -4   9   23.31    1.57
   7   4   9   27.53    1.69
  -7   4  -9   23.53    1.49
   8  -4   9   24.01    1.65
   8   4   9   26.62    1.79
   9  -4   9   39.63    2.23
   9   4   9   43.89    2.35
  10  -4   9    6.32    1.17
  10   4   9    5.40    1.10
  11  -4   9    5.17    1.09
  11   4   9    4.70    1.08
  12  -4   9    0.66    0.83
  12   4   9   -0.64    0.71
  12  -5  -9   -0.17    0.78
  12   5  -9    0.83    0.67
  11  -5  -9    8.16    1.31
  11   5  -9    8.56    1.05
  10  -5  -9    1.11    0.75
  10   5  -9    1.29    0.58
   9  -5  -9   21.16    1.74
   9   5  -9   22.47    1.33
   8  -5  -9   13.17    1.39
   8   5  -9   11.64    0.86
   8   5  -9   13.25    0.96
   7  -5  -9    7.20    1.04
  -7   5   9    5.06    0.88
   7   5  -9    5.59    0.59
   7   5  -9    4.45    0.56
  -6  -5   9    0.18    0.26
   6  -5  -9   -0.09    0.46
  -6   5   9    0.49    0.51
   6   5  -9    0.00    0.27
   6   5  -9    0.22    0.24
   5  -5  -9    1.47    0.59
   5  -5  -9    0.95    0.51
  -5  -5   9    1.71    0.30
   5   5  -9    1.65    0.28
  -5   5   9    1.77    0.57
   5   5  -9    1.65    0.30
  -4  -5   9    0.14    0.17
   4  -5  -9   -0.27    0.35
   4  -5  -9    0.45    0.46
  -4   5   9    0.43    0.46
  -4   5   9   -0.29    0.38
   3  -5  -9    2.09    0.54
   3  -5  -9    1.95    0.53
  -3   5   9    1.72    0.50
  -3   5   9    2.32    0.59
   2  -5  -9    6.52    0.81
   2  -5  -9    6.42    0.78
  -2   5   9    6.87    0.80
  -2   5   9    6.88    0.76
   1  -5  -9    6.15    0.77
   1  -5  -9    6.16    0.78
  -1   5   9    5.43    0.75
  -1   5   9    5.80    0.74
   0  -5  -9    4.97    0.68
   0  -5  -9    4.12    0.64
   0  -5   9    4.35    0.36
   0   5  -9    4.59    0.35
   0   5   9    4.84    0.72
   0   5   9    5.89    0.81
   1  -5   9   15.10    0.74
  -1  -5  -9   15.26    1.06
  -1  -5  -9   16.70    1.10
   1   5   9   14.75    1.08
  -1   5  -9   16.42    0.74
  -2  -5  -9    5.63    0.78
  -2  -5  -9    4.79    0.71
   2  -5   9    5.03    0.55
  -2   5  -9    5.05    0.53
   2   5   9    4.28    0.66
  -3  -5  -9    5.54    0.80
  -3  -5  -9    4.98    0.76
   3  -5   9    5.30    0.64
  -3   5  -9    6.42    0.66
   3   5   9    4.86    0.73
   4  -5   9    9.70    0.91
   4   5   9    7.59    0.89
  -4   5  -9    9.26    0.86
   5  -5   9    7.54    0.85
  -5   5  -9    6.41    0.77
   5   5   9    7.96    0.97
   6  -5   9    0.54    0.52
   6   5   9    0.46    0.53
  -6   5  -9    0.49    0.43
   7  -5   9   19.90    1.46
  -7   5  -9   20.53    1.38
   7   5   9   19.42    1.54
   8  -5   9    4.93    0.91
   8   5   9    6.61    1.06
   9  -5   9   33.61    2.07
   9   5   9   33.79    2.10
  10  -5   9    3.78    0.99
  10   5   9    3.82    0.94
  11  -5   9   31.40    2.23
  11   5   9   25.86    2.02
  12  -5   9    0.84    0.88
  12   5   9   -0.59    0.74
  12  -6  -9    2.18    1.01
  12   6  -9    3.68    0.83
  11  -6  -9   12.74    1.64
  11   6  -9   14.06    1.27
  10  -6  -9   11.53    1.50
  10   6  -9   10.54    1.03
   9  -6  -9   24.88    1.88
   9   6  -9   28.50    1.44
   8  -6  -9   13.92    1.44
   8   6  -9   11.30    0.88
   8   6  -9   11.39    0.83
   7  -6  -9   27.13    1.83
  -7   6   9   30.74    1.80
   7   6  -9   29.29    1.20
   7   6  -9   28.32    1.24
   6  -6  -9    1.16    0.65
  -6  -6   9    1.65    0.33
   6   6  -9    1.26    0.30
  -6   6   9    1.43    0.60
   6   6  -9    1.39    0.33
   5  -6  -9   32.81    1.81
  -5  -6   9   33.60    1.11
  -5   6   9   33.07    1.77
   5   6  -9   35.07    1.09
   4  -6  -9   53.71    2.28
   4  -6  -9   52.22    2.25
  -4   6   9   51.64    2.24
   3  -6  -9   41.41    1.90
   3  -6  -9   41.92    1.89
  -3   6   9   40.57    1.83
  -3   6   9   40.22    1.88
   2  -6  -9    7.90    0.89
   2  -6  -9    8.72    0.89
  -2   6   9   10.40    1.01
  -2   6   9   10.44    0.92
   1  -6  -9   31.15    1.59
   1  -6  -9   34.27    1.63
  -1   6   9   32.60    1.60
  -1   6   9   33.48    1.63
   0  -6  -9  114.46    3.70
   0  -6  -9  114.41    3.70
   0  -6   9  110.81    3.04
   0  -6   9  106.19    3.02
   0   6  -9  110.02    3.00
   0   6   9  113.40    3.67
   0   6   9  112.28    3.69
  -1  -6  -9   24.21    1.36
   1  -6   9   21.63    0.92
  -1  -6  -9   23.74    1.35
  -1   6  -9   23.21    0.90
   1   6   9   22.02    1.32
  -2  -6  -9   45.54    1.97
  -2  -6  -9   46.90    1.95
   2  -6   9   43.53    1.59
   2   6   9   41.87    1.90
  -2   6  -9   43.34    1.56
   3  -6   9   30.96    1.39
  -3  -6  -9   34.21    1.69
  -3   6  -9   32.78    1.37
   3   6   9   33.37    1.67
  -4  -6  -9   34.83    1.78
   4  -6   9   28.70    1.44
   4   6   9   29.58    1.62
  -4   6  -9   28.17    1.36
   5  -6   9   36.17    1.73
   5   6   9   38.47    1.91
   6  -6   9    0.85    0.56
   6   6   9    2.07    0.70
  -6   6  -9    1.06    0.49
   7  -6   9   18.04    1.43
  -7   6  -9   19.30    1.35
   7   6   9   17.61    1.49
   8  -6   9   21.08    1.59
   8   6   9   23.23    1.68
   9  -6   9    9.08    1.26
   9   6   9    8.62    1.31
  10  -6   9    8.50    1.32
  10   6   9   11.28    1.46
  11  -6   9    3.01    1.04
  11   6   9    4.18    1.08
  11  -7  -9    1.30    0.85
  11   7  -9    1.54    0.66
  10  -7  -9    6.85    1.28
  10   7  -9    8.71    0.92
   9  -7  -9    2.70    0.92
   9   7  -9    2.55    0.56
   8  -7  -9   13.99    1.48
   8   7  -9   14.13    0.91
  -8   7   9   13.40    1.48
   7  -7  -9    1.90    0.83
   7   7  -9    2.23    0.37
   7   7  -9    2.45    0.41
  -7   7   9    2.16    0.76
   6  -7  -9   -0.09    0.58
  -6  -7   9   -0.01    0.22
   6   7  -9    0.04    0.18
   6   7  -9   -0.03    0.23
  -6   7   9   -0.14    0.52
   5  -7  -9   15.95    1.33
  -5   7   9   16.60    1.36
   4  -7  -9   15.25    1.30
  -4   7   9   13.27    1.27
   3  -7  -9    3.23    0.70
  -3   7   9    2.48    0.66
   2  -7  -9   14.63    1.20
  -2   7   9   13.91    1.06
  -2   7   9   13.77    1.13
   1  -7  -9    1.96    0.60
  -1   7   9    1.77    0.59
  -1   7   9    2.40    0.63
   0  -7  -9    2.45    0.60
   0   7   9    1.20    0.53
   0   7   9    1.64    0.53
   1  -7   9    9.31    0.59
  -1  -7  -9    9.42    0.97
   1  -7   9    8.82    0.58
  -1   7  -9    8.63    0.52
   1   7   9    7.98    0.94
   2  -7   9    2.45    0.42
  -2  -7  -9    2.39    0.60
   2  -7   9    2.25    0.41
  -2   7  -9    2.58    0.40
   2   7   9    2.06    0.61
   3  -7   9   -0.09    0.30
  -3  -7  -9    0.43    0.51
   3  -7   9   -0.24    0.32
   3   7   9    0.35    0.49
  -3   7  -9    0.37    0.28
  -4  -7  -9    8.53    1.02
   4  -7   9    7.92    0.83
   4   7   9    7.52    0.93
  -4   7  -9    8.84    0.77
  -5  -7  -9    8.61    1.10
   5  -7   9   11.23    1.04
   5   7   9    9.53    1.08
   6  -7   9    4.71    0.83
   6   7   9    3.93    0.84
  -6   7  -9    4.85    0.75
   7  -7   9    5.52    0.95
  -7   7  -9    5.24    0.85
   7   7   9    5.07    0.97
   8  -7   9    0.15    0.59
   8   7   9    0.10    0.65
   9  -7   9    0.56    0.74
   9   7   9    0.57    0.68
  10  -7   9   18.58    1.86
  10   7   9   16.13    1.76
  11  -7   9    9.85    1.51
  11   7   9    9.25    1.44
  11  -8  -9    0.50    0.87
  11   8  -9    0.75    0.52
  10  -8  -9   16.28    1.77
  10   8  -9   20.97    1.26
   9  -8  -9    2.67    0.99
   9   8  -9    3.16    0.58
   8  -8  -9    4.45    0.98
   8   8  -9    5.30    0.59
  -8   8   9    4.66    1.04
   7  -8  -9    0.53    0.67
   7   8  -9    0.38    0.22
  -7   8   9   -0.02    0.63
   7   8  -9    0.00    0.27
   6  -8  -9   66.44    2.97
  -6   8   9   66.99    2.93
   5  -8  -9   24.20    1.70
  -5   8   9   26.52    1.69
   4  -8  -9   45.44    2.21
  -4   8   9   43.26    2.13
   3  -8  -9   53.48    2.37
  -3   8   9   56.19    2.45
   2  -8  -9   76.70    2.97
  -2   8   9   74.17    2.96
  -2   8   9   83.44    3.16
   1  -8  -9    2.55    0.66
  -1   8   9    4.21    0.75
  -1   8   9    3.17    0.70
   0  -8  -9   52.50    2.25
   0   8   9   50.83    2.23
   0   8   9   47.89    2.18
   1  -8   9    9.86    0.62
  -1  -8  -9   11.44    1.10
   1   8   9   11.04    1.10
  -1   8  -9    8.26    0.53
  -2  -8  -9   70.65    2.77
   2  -8   9   70.40    2.31
   2  -8   9   72.48    2.32
  -2   8  -9   70.15    2.25
   2   8   9   71.57    2.81
  -3  -8  -9    9.56    1.07
   3  -8   9   10.18    0.85
  -3   8  -9    9.05    0.72
   3   8   9    8.85    1.01
   4  -8   9   28.75    1.44
  -4  -8  -9   28.83    1.70
  -4   8  -9   26.83    1.32
   4   8   9   24.40    1.56
   5  -8   9   26.25    1.50
  -5  -8  -9   22.49    1.71
   5   8   9   27.86    1.70
   6  -8   9   32.06    1.82
  -6  -8  -9   34.01    2.06
  -6   8  -9   32.80    1.71
   6   8   9   33.22    1.91
   7  -8   9   16.71    1.40
   7   8   9   13.65    1.47
   8  -8   9    6.97    1.07
   8   8   9    9.22    1.27
   9  -8   9    1.00    0.77
   9   8   9    0.16    0.68
  10  -8   9    1.98    0.92
  10   8   9    2.21    0.94
  10  -9  -9    1.84    0.95
  10   9  -9    2.16    0.56
   9  -9  -9   20.73    2.05
   9   9  -9   21.76    1.12
   8  -9  -9    6.41    1.23
  -8   9   9    4.83    1.05
   8   9  -9    5.37    0.54
   7  -9  -9   23.73    1.84
  -7   9   9   24.66    1.86
   6  -9  -9   16.28    1.60
  -6   9   9   13.35    1.45
   5  -9  -9    7.00    1.10
  -5   9   9    5.49    0.96
   4  -9  -9   16.32    1.50
  -4   9   9   17.98    1.46
   3  -9  -9    6.05    0.96
  -3   9   9    4.52    0.87
   2  -9  -9    0.00    0.53
  -2   9   9    0.27    0.53
   1  -9  -9   -0.22    0.49
  -1   9   9   -0.64    0.41
   0  -9  -9   -0.47    0.53
   0   9   9    0.22    0.50
   0   9   9   -0.09    0.59
   1  -9   9    3.55    0.42
   1  -9   9    3.53    0.42
  -1  -9  -9    3.51    0.73
  -1   9  -9    3.49    0.38
   1   9   9    2.84    0.73
   2  -9   9    0.09    0.33
  -2  -9  -9    0.11    0.55
  -2   9  -9   -0.06    0.23
   2   9   9   -0.34    0.45
  -3  -9  -9   -0.75    0.48
   3  -9   9   -0.02    0.39
  -3   9  -9    0.02    0.27
   3   9   9   -0.11    0.52
  -4  -9  -9    2.68    0.78
   4  -9   9    3.56    0.65
   4   9   9    3.06    0.75
  -4   9  -9    3.80    0.59
   5  -9   9    1.13    0.58
  -5  -9  -9    0.25    0.71
  -5   9  -9   -0.17    0.27
   5   9   9    1.58    0.71
  -6  -9  -9    2.78    0.86
   6  -9   9    2.04    0.71
   6   9   9    1.67    0.73
   7  -9   9    3.57    0.83
  -7  -9  -9    1.54    0.85
   7   9   9    2.93    0.85
   8  -9   9    1.78    0.80
  -8  -9  -9   -1.67    0.91
   8   9   9    1.80    0.80
   9  -9   9   14.75    1.54
   9   9   9   12.48    1.53
  10   9   9   10.78    1.53
  10 -10  -9    1.24    0.95
  10  10  -9   -0.43    0.45
   9 -10  -9   16.82    1.82
   9  10  -9   21.42    1.04
   8 -10  -9    1.63    0.91
  -8  10   9    2.90    0.93
   7 -10  -9   45.40    2.57
  -7  10   9   47.68    2.56
   6 -10  -9   -1.31    0.64
  -6  10   9    0.17    0.62
   5 -10  -9   39.25    2.27
  -5  10   9   40.12    2.23
   4 -10  -9   10.80    1.29
  -4  10   9    6.61    1.03
   3 -10  -9   86.14    3.42
  -3  10   9   89.08    3.47
   2 -10  -9    3.91    0.85
  -2  10   9    3.95    0.85
   1 -10  -9   25.55    1.64
  -1  10   9   27.19    1.72
   0 -10  -9    3.30    0.80
   0  10   9    1.42    0.67
  -1 -10  -9   58.72    2.63
   1 -10   9   61.33    2.01
   1 -10   9   62.89    2.01
  -1  10  -9   62.95    1.95
   1  10   9   65.02    2.70
   2 -10   9    5.09    0.61
  -2 -10  -9    3.24    0.82
   2  10   9    5.74    0.95
  -2  10  -9    5.19    0.54
  -3 -10  -9   43.46    2.20
   3 -10   9   47.16    1.86
  -3  10  -9   43.43    1.73
   3  10   9   48.55    2.31
   4 -10   9    3.88    0.70
  -4 -10  -9    6.45    1.01
   4  10   9    5.69    0.99
   5 -10   9   24.59    1.51
  -5 -10  -9   21.80    1.69
   5  10   9   23.29    1.69
   6 -10   9    1.25    0.65
  -6 -10  -9    1.20    0.78
   6  10   9    0.84    0.70
   7 -10   9   21.10    1.74
  -7 -10  -9   22.32    1.84
   7  10   9   24.36    1.77
  -8 -10  -9    5.62    1.17
   8  10   9    5.47    1.10
  -9 -10  -9   -2.24    0.91
   9  10   9   -0.52    0.69
   9 -11  -9    7.78    1.37
   8 -11  -9    7.94    1.42
  -8  11   9    8.33    1.29
   7 -11  -9    1.38    0.87
  -7  11   9    2.43    0.86
   6 -11  -9    3.63    1.04
  -6  11   9    2.16    0.84
   5 -11  -9    6.51    1.16
  -5  11   9    9.17    1.27
   4 -11  -9   -0.27    0.66
  -4  11   9    1.31    0.72
   3 -11  -9    0.35    0.70
  -3  11   9    0.37    0.64
   2 -11  -9    3.50    0.85
  -2  11   9    2.45    0.82
   1 -11  -9    0.72    0.67
  -1  11   9    0.81    0.60
   0 -11  -9    0.01    0.61
   0  11   9    0.08    0.57
  -1 -11  -9    0.40    0.62
   1 -11   9    0.67    0.35
   1  11   9    1.04    0.67
  -1  11  -9    1.03    0.28
  -2 -11  -9    0.06    0.67
   2  11   9   -0.19    0.55
  -3 -11  -9    1.64    0.71
   3  11   9    0.64    0.70
  -4 -11  -9    1.59    0.70
   4  11   9    0.61    0.66
  -5 -11  -9   10.73    1.25
   5  11   9   12.08    1.37
  -6 -11  -9   13.15    1.43
   6  11   9    9.16    1.28
  -7 -11  -9    4.37    1.12
   7  11   9    5.12    1.06
  -8 -11  -9    0.64    0.84
   8  11   9    1.30    0.87
   8 -12  -9   15.68    1.86
  -8  12   9   11.88    1.60
   7 -12  -9    5.53    1.23
  -7  12   9    7.19    1.29
   6 -12  -9   12.59    1.58
  -6  12   9   12.93    1.58
   5 -12  -9    8.70    1.37
  -5  12   9    9.64    1.33
   4 -12  -9   47.44    2.50
  -4  12   9   43.02    2.40
   3 -12  -9   -0.60    0.65
  -3  12   9    0.27    0.60
   2 -12  -9   13.86    1.43
  -2  12   9   14.54    1.53
   1 -12  -9   -0.32    0.65
  -1  12   9    0.57    0.64
   0 -12  -9   84.22    3.39
   0  12   9   82.81    3.40
  -1 -12  -9   11.72    1.39
   1  12   9    8.98    1.20
  -2 -12  -9   29.79    1.95
   2  12   9   32.05    1.98
  -3 -12  -9    0.43    0.70
   3  12   9    1.33    0.71
  -4 -12  -9   12.71    1.39
   4  12   9    7.66    1.18
  -5 -12  -9    6.43    1.17
   5  12   9    4.62    1.03
  -6 -12  -9    9.12    1.31
   6  12   9    9.65    1.32
  -7 -12  -9    2.10    0.98
   7  12   9    1.52    0.88
   7 -13  -9   -0.50    0.86
  -7  13   9    0.80    0.76
   6 -13  -9    1.76    0.89
  -6  13   9    2.79    0.95
   5 -13  -9    1.58    0.88
  -5  13   9    4.19    1.05
   4 -13  -9    0.87    0.85
  -4  13   9    0.24    0.63
   3 -13  -9    3.36    1.02
  -3  13   9    3.10    0.89
   2 -13  -9    0.90    0.76
  -2  13   9    0.42    0.69
   1 -13  -9   -0.12    0.67
  -1  13   9    1.68    0.72
   0 -13  -9    5.75    1.06
   0  13   9    7.26    1.13
  -1 -13  -9   -0.57    0.62
   1  13   9    0.53    0.68
  -2 -13  -9    0.55    0.74
   2  13   9   -0.11    0.63
  -3 -13  -9   -0.60    0.77
   3  13   9    0.07    0.61
  -4 -13  -9    3.04    0.95
   4  13   9    4.63    1.05
  -5 -13  -9    2.28    0.87
   5  13   9    1.46    0.82
   6  13   9   11.97    1.54
   5 -14  -9    5.83    1.25
  -5  14   9    6.07    1.19
   4 -14  -9    8.51    1.38
  -4  14   9    3.32    0.99
   3 -14  -9   12.41    1.49
  -3  14   9    8.39    1.31
   2 -14  -9    7.20    1.24
  -2  14   9    8.24    1.26
   1 -14  -9   26.54    2.01
  -1  14   9   28.19    2.04
   0 -14  -9    0.94    0.82
   0  14   9    0.97    0.78
  -1 -14  -9   14.82    1.56
   1  14   9   14.58    1.61
  -2 -14  -9    5.37    1.05
   2  14   9    5.96    1.09
   3  14   9    4.02    1.01
   4  14   9    4.36    1.07
   5  14   9    8.18    1.31
   3 -15  -9    1.68    0.96
  -3  15   9    0.65    0.75
   2 -15  -9   -0.04    0.84
  -2  15   9    1.19    0.74
  -1  15   9   -0.75    0.62
   0  15   9   -0.61    0.60
   1  15   9    0.67    0.75
   2  15   9   -0.31    0.66
  13   0 -10   -0.01    0.73
  12   0 -10   14.90    1.61
  11   0 -10    0.20    0.62
  10   0 -10    0.03    0.54
   9   0 -10   -0.55    0.38
   9   0 -10    0.56    0.56
   8   0 -10    0.46    0.47
   8   0 -10    1.09    0.56
   7   0 -10   -0.34    0.31
   7   0 -10    0.49    0.45
   6   0 -10   11.61    0.86
   6   0 -10   11.48    0.93
  -5   0  10    0.05    0.32
   5   0 -10   -0.37    0.33
  -5   0  10    0.71    0.39
   5   0 -10    0.50    0.31
  -4   0  10   11.95    0.81
   4   0 -10   12.74    0.84
  -4   0  10   11.28    0.80
   4   0 -10   10.82    0.77
   3   0 -10   -0.11    0.28
  -3   0  10    0.30    0.30
   3   0 -10   -0.35    0.27
  -3   0  10   -0.14    0.27
   2   0 -10   20.56    1.00
  -2   0  10   19.42    0.99
   2   0 -10   20.48    1.01
  -2   0  10   21.13    0.99
  -1   0  10   -0.06    0.27
   1   0 -10    0.06    0.30
   1   0 -10    0.12    0.28
   0   0 -10  191.76    5.31
   0   0  10  185.68    5.29
   0   0 -10  184.39    5.27
   1   0  10    0.02    0.30
  -1   0 -10    0.13    0.28
   2   0  10   81.90    2.65
  -2   0 -10   77.55    2.61
  -3   0 -10   -0.41    0.24
   3   0  10    0.94    0.39
  -4   0 -10   67.17    2.45
   4   0  10   66.04    2.45
  -5   0 -10    0.03    0.38
   5   0  10   -0.29    0.40
   6   0  10   35.57    1.84
  -6   0 -10   39.43    1.87
   7   0  10   -0.45    0.47
   8   0  10   46.48    2.33
   9   0  10   -0.61    0.57
  10   0  10   70.37    3.20
  11   0  10    0.73    0.74
  12   0  10   12.39    1.61
  13  -1 -10   13.15    1.55
  13   1 -10   11.56    1.49
  12  -1 -10   13.94    1.58
  12   1 -10   11.92    1.41
  11  -1 -10   17.92    1.58
  11   1 -10   17.51    1.49
  10  -1 -10   11.68    1.27
  10   1 -10   12.06    1.25
   9  -1 -10    5.80    0.93
   9  -1 -10    4.66    0.81
   9   1 -10    6.08    0.84
   9   1 -10    7.02    0.97
   8  -1 -10   21.60    1.36
   8  -1 -10   20.60    1.40
   8   1 -10   19.69    1.31
   8   1 -10   20.37    1.24
   7  -1 -10   22.79    1.32
   7  -1 -10   21.81    1.33
   7   1 -10   23.34    1.23
   7   1 -10   21.66    1.28
   6  -1 -10   32.26    1.54
   6  -1 -10   34.17    1.61
  -6   1  10   32.67    1.58
   6   1 -10   33.87    1.47
   6   1 -10   33.37    1.48
  -5  -1  10   55.33    1.95
  -5  -1  10   53.74    1.97
   5  -1 -10   58.34    2.14
  -5   1  10   55.15    2.11
   5   1 -10   52.02    1.96
   5   1 -10   56.03    1.97
  -5   1  10   55.42    2.07
  -4  -1  10  157.45    4.55
  -4  -1  10  162.73    4.56
   4  -1 -10  157.85    4.69
   4  -1 -10  155.11    4.67
   4   1 -10  157.80    4.56
   4   1 -10  158.13    4.56
  -4   1  10  162.50    4.69
  -4   1  10  156.25    4.70
   3  -1 -10  146.33    4.33
   3  -1 -10  144.69    4.32
  -3  -1  10  144.99    4.17
  -3  -1  10  144.86    4.18
   3   1 -10  144.82    4.18
   3   1 -10  145.25    4.18
  -3   1  10  146.93    4.31
  -3   1  10  150.68    4.35
  -2  -1  10   58.17    1.93
   2  -1 -10   60.50    2.10
   2  -1 -10   56.77    2.05
  -2  -1  10   60.55    1.96
  -2   1  10   60.05    2.09
   2   1 -10   58.00    1.92
  -2   1  10   61.11    2.07
   2   1 -10   60.53    1.96
  -1  -1  10   35.25    1.35
   1  -1 -10   36.33    1.45
   1  -1 -10   36.16    1.49
   1   1 -10   37.08    1.34
  -1   1  10   37.56    1.48
   1   1 -10   33.42    1.35
  -1   1  10   37.39    1.49
   0  -1 -10   47.39    1.74
   0  -1 -10   46.27    1.78
   0  -1  10   47.52    1.65
   0   1 -10   48.61    1.68
   0   1 -10   46.94    1.64
   0   1  10   45.71    1.75
   1  -1  10   16.95    0.92
  -1  -1 -10   19.72    1.01
  -1  -1 -10   17.73    1.05
   1   1  10   17.56    1.02
  -1   1 -10   19.45    0.96
   2  -1  10   39.21    1.57
   2   1  10   38.98    1.64
  -2   1 -10   41.99    1.59
   3  -1  10   33.58    1.50
  -3  -1 -10   34.56    1.53
   3   1  10   35.00    1.57
   4  -1  10   70.74    2.60
  -4  -1 -10   75.21    2.65
   4   1  10   73.07    2.64
  -4   1 -10   71.92    2.58
   5  -1  10    2.96    0.62
  -5  -1 -10    3.09    0.62
   5   1  10    2.65    0.64
  -5   1 -10    2.08    0.54
   6  -1  10    8.27    0.98
  -6  -1 -10    9.75    1.06
   6   1  10    8.76    1.02
  -6   1 -10    8.36    0.96
   7  -1  10    7.73    0.99
   7   1  10    7.24    1.02
   8  -1  10    3.42    0.82
   8   1  10    2.76    0.77
   9  -1  10    9.87    1.31
   9   1  10   11.44    1.37
  10  -1  10    6.45    1.19
  10   1  10    4.91    1.04
  11  -1  10    1.79    0.84
  11   1  10    0.63    0.77
  12  -1  10    1.17    0.84
  12   1  10   -0.12    0.78
  12  -2 -10    6.63    1.19
  12   2 -10    4.28    0.96
  11  -2 -10    7.85    1.18
  11   2 -10    6.32    1.04
  10  -2 -10   27.96    1.83
  10   2 -10   25.66    1.59
   9  -2 -10    2.19    0.73
   9  -2 -10    1.71    0.69
   9   2 -10    1.67    0.62
   9   2 -10    0.73    0.47
   8  -2 -10    3.61    0.78
   8  -2 -10    3.40    0.71
   8   2 -10    4.66    0.68
   8   2 -10    3.40    0.64
   7  -2 -10    1.09    0.46
   7  -2 -10    0.80    0.52
   7   2 -10    0.73    0.43
   7   2 -10    0.71    0.39
  -6  -2  10    6.91    0.69
   6  -2 -10    6.58    0.83
   6  -2 -10    5.99    0.78
   6   2 -10    6.63    0.67
  -6   2  10    7.65    0.84
   6   2 -10    6.31    0.67
   5  -2 -10    1.49    0.45
   5  -2 -10    0.99    0.46
  -5  -2  10    1.35    0.36
  -5   2  10    1.14    0.47
   5   2 -10    1.15    0.37
   5   2 -10    1.81    0.39
  -4  -2  10    0.31    0.26
   4  -2 -10    0.35    0.40
  -4  -2  10    0.18    0.26
   4  -2 -10    0.30    0.31
  -4   2  10    0.54    0.32
   4   2 -10    0.05    0.25
  -4   2  10    0.07    0.36
   4   2 -10    0.26    0.27
  -3  -2  10   15.04    0.77
   3  -2 -10   16.74    1.04
  -3  -2  10   15.45    0.77
   3   2 -10   17.15    0.80
  -3   2  10   15.92    1.02
   3   2 -10   17.08    0.79
  -3   2  10   15.51    0.92
   2  -2 -10    0.05    0.28
   2  -2 -10   -0.31    0.34
  -2  -2  10   -0.34    0.26
  -2  -2  10    0.05    0.24
   2   2 -10    0.12    0.24
  -2   2  10    0.24    0.34
  -2   2  10   -0.18    0.18
   2   2 -10   -0.36    0.22
  -1  -2  10   53.66    1.75
   1  -2 -10   54.52    2.00
   1   2 -10   54.95    1.73
   1   2 -10   54.08    1.76
  -1   2  10   51.69    1.99
   0  -2  10    0.26    0.24
   0  -2 -10    0.07    0.24
   0  -2 -10   -0.14    0.38
   0   2 -10    0.28    0.29
   0   2  10    0.15    0.34
   0   2 -10    0.19    0.25
  -1  -2 -10  102.80    3.21
  -1  -2 -10   89.47    3.12
   1  -2  10  102.96    3.01
   1   2  10   98.90    3.18
  -1   2 -10  102.38    3.01
   2  -2  10   10.35    0.75
  -2  -2 -10    9.16    0.80
   2   2  10    9.69    0.84
  -2   2 -10   11.98    0.79
  -3  -2 -10  131.55    4.04
   3  -2  10  124.99    3.91
  -3   2 -10  131.34    3.93
   3   2  10  125.84    4.02
   4  -2  10    0.83    0.42
  -4  -2 -10    0.21    0.39
   4   2  10    0.46    0.43
  -4   2 -10    0.43    0.35
   5  -2  10   38.06    1.75
  -5  -2 -10   38.64    1.82
  -5   2 -10   39.97    1.77
   5   2  10   37.58    1.81
   6  -2  10   -0.15    0.46
  -6   2 -10   -0.10    0.38
   6   2  10    0.25    0.49
   7  -2  10   62.45    2.62
   7   2  10   57.46    2.55
  -7   2 -10   58.78    2.54
   8  -2  10    5.12    0.97
   8   2  10    5.15    0.95
   9  -2  10   30.98    1.96
   9   2  10   25.79    1.86
  10  -2  10    2.74    0.92
  10   2  10    1.21    0.79
  11  -2  10   22.29    1.95
  11   2  10   19.10    1.94
  12  -2  10    4.53    1.15
  12   2  10    3.77    1.13
  12  -3 -10   11.12    1.48
  12   3 -10   11.96    1.33
  11  -3 -10   22.74    1.75
  11   3 -10   20.80    1.54
  10  -3 -10    0.82    0.70
  10   3 -10    1.06    0.63
   9  -3 -10   51.80    2.49
   9   3 -10   53.47    2.22
   8  -3 -10    0.41    0.60
   8  -3 -10    0.48    0.51
   8   3 -10    1.35    0.53
   8   3 -10    1.54    0.46
   7  -3 -10   30.01    1.68
   7  -3 -10   32.96    1.69
   7   3 -10   29.35    1.36
  -7   3  10   31.75    1.72
   7   3 -10   28.37    1.37
   6  -3 -10   42.41    1.89
   6  -3 -10   41.05    1.91
  -6  -3  10   41.42    1.57
  -6   3  10   40.73    1.89
   6   3 -10   40.65    1.59
   6   3 -10   41.31    1.58
  -5  -3  10   57.54    1.93
   5  -3 -10   59.37    2.30
   5  -3 -10   59.05    2.33
   5   3 -10   58.47    1.95
  -5   3  10   55.38    2.29
   5   3 -10   61.05    1.95
   4  -3 -10    1.70    0.54
  -4  -3  10    0.94    0.29
   4  -3 -10    1.17    0.43
   4   3 -10    1.26    0.30
   4   3 -10    1.38    0.30
  -4   3  10    1.30    0.43
  -4   3  10    0.90    0.45
   3  -3 -10   53.16    2.06
  -3  -3  10   51.34    1.64
  -3  -3  10   52.48    1.65
   3  -3 -10   51.18    2.03
   3   3 -10   52.13    1.64
  -3   3  10   53.99    2.02
  -3   3  10   55.63    2.10
   3   3 -10   51.32    1.63
   2  -3 -10   43.76    1.81
   2  -3 -10   47.15    1.82
  -2  -3  10   43.41    1.40
   2   3 -10   44.35    1.40
  -2   3  10   44.78    1.76
   2   3 -10   43.82    1.40
  -2   3  10   43.39    1.81
   1  -3 -10   35.41    1.51
  -1  -3  10   34.34    1.18
   1  -3 -10   32.29    1.52
  -1   3  10   34.77    1.56
  -1   3  10   35.61    1.54
   1   3 -10   34.07    1.16
   1   3 -10   33.64    1.18
   0  -3  10    0.00    0.21
   0  -3 -10    0.22    0.41
   0  -3 -10    0.23    0.34
   0   3 -10   -0.29    0.25
   0   3  10    0.09    0.36
   0   3 -10   -0.08    0.21
  -1  -3 -10   93.79    3.04
  -1  -3 -10   87.64    3.00
   1  -3  10   91.15    2.75
   1   3  10   89.50    3.01
  -1   3 -10   92.29    2.75
  -2  -3 -10    4.37    0.69
   2  -3  10    4.13    0.53
  -2  -3 -10    4.08    0.64
   2   3  10    4.01    0.64
  -2   3 -10    3.76    0.50
  -3  -3 -10   13.97    1.02
   3  -3  10   12.87    0.88
  -3   3 -10   12.68    0.85
   3   3  10   11.27    0.95
   4  -3  10   33.07    1.55
  -4  -3 -10   36.73    1.70
   4   3  10   32.64    1.65
   5  -3  10   50.48    2.10
   5   3  10   50.63    2.18
  -5   3 -10   48.46    2.04
   6  -3  10    1.43    0.60
  -6   3 -10    1.20    0.51
   6   3  10    1.66    0.65
   7  -3  10    7.55    1.00
   7   3  10    5.62    0.94
  -7   3 -10    6.81    0.95
   8  -3  10    1.13    0.68
   8   3  10    1.08    0.65
   9  -3  10    0.51    0.68
   9   3  10    0.82    0.72
  10  -3  10    1.23    0.81
  10   3  10    1.95    0.78
  11  -3  10    0.23    0.72
  11   3  10    0.56    0.73
  12  -3  10    1.11    0.91
  12   3  10    0.06    0.74
  12  -4 -10    3.65    1.01
  12   4 -10    3.71    0.89
  11  -4 -10    4.10    1.01
  11   4 -10    4.31    0.85
  10  -4 -10    9.85    1.29
  10   4 -10   10.91    1.12
   9  -4 -10    8.44    1.19
   9   4 -10    6.72    0.86
   8  -4 -10   22.15    1.61
   8   4 -10   22.69    1.24
   8   4 -10   20.11    1.17
   7  -4 -10    1.85    0.65
   7   4 -10    2.00    0.48
   7   4 -10    2.05    0.44
  -7   4  10    1.81    0.67
   6  -4 -10    0.55    0.50
  -6  -4  10    0.20    0.28
   6  -4 -10    0.18    0.42
   6   4 -10    0.32    0.32
  -6   4  10    0.36    0.50
   6   4 -10    0.59    0.29
   5  -4 -10    3.88    0.69
  -5  -4  10    2.87    0.38
   5  -4 -10    2.51    0.61
  -5   4  10    2.82    0.64
   5   4 -10    2.49    0.38
   5   4 -10    2.09    0.35
   4  -4 -10   35.26    1.68
  -4  -4  10   35.17    1.20
   4  -4 -10   35.06    1.69
   4   4 -10   35.02    1.19
  -4   4  10   37.29    1.74
   4   4 -10   34.77    1.18
  -4   4  10   36.37    1.71
  -3  -4  10    0.07    0.19
   3  -4 -10   -0.52    0.34
   3  -4 -10    0.41    0.44
  -3   4  10   -0.26    0.34
   3   4 -10   -0.18    0.16
  -3   4  10   -0.20    0.39
   3   4 -10   -0.12    0.17
   2  -4 -10   15.29    1.02
   2  -4 -10   13.55    1.03
  -2  -4  10   14.49    0.55
  -2   4  10   13.56    1.02
  -2   4  10   13.35    0.95
  -1  -4  10    9.80    0.50
   1  -4 -10    8.05    0.87
   1  -4 -10   11.49    0.90
  -1   4  10   10.58    0.95
  -1   4  10   10.12    0.97
   1   4 -10   10.39    0.50
   1   4 -10   11.99    0.53
   0  -4 -10    2.69    0.56
   0  -4  10    2.75    0.35
   0  -4 -10    2.33    0.53
   0   4  10    2.87    0.67
   0   4 -10    3.44    0.39
   0   4  10    2.43    0.53
   0   4 -10    3.06    0.35
   1  -4  10    2.51    0.38
  -1  -4 -10    1.95    0.57
  -1  -4 -10    1.57    0.48
  -1   4 -10    2.80    0.39
   1   4  10    2.44    0.53
  -2  -4 -10   15.00    1.11
  -2  -4 -10   16.70    1.11
   2  -4  10   14.86    0.86
   2   4  10   13.91    1.01
  -2   4 -10   15.36    0.84
  -3  -4 -10   12.22    1.00
  -3  -4 -10    9.00    0.96
   3  -4  10   11.06    0.83
  -3   4 -10   10.24    0.77
   3   4  10   11.03    0.96
   4  -4  10   18.90    1.14
  -4  -4 -10   19.71    1.25
  -4   4 -10   16.50    1.04
   4   4  10   18.27    1.25
   5  -4  10   84.70    3.03
   5   4  10   87.46    3.19
  -5   4 -10   85.30    3.00
   6  -4  10   41.77    1.96
  -6   4 -10   39.93    1.89
   6   4  10   40.17    2.05
   7  -4  10   17.61    1.37
   7   4  10   15.87    1.38
  -7   4 -10   16.00    1.28
   8  -4  10   40.45    2.16
   8   4  10   42.66    2.27
   9  -4  10    7.87    1.17
   9   4  10    8.50    1.25
  10  -4  10   20.21    1.78
  10   4  10   19.65    1.90
  11  -4  10    6.57    1.20
  11   4  10    8.95    1.45
  12  -4  10    6.89    1.31
  12   4  10    7.37    1.39
  12  -5 -10   29.58    2.22
  12   5 -10   30.26    1.84
  11  -5 -10    0.18    0.78
  11   5 -10    0.98    0.61
  10  -5 -10   18.93    1.83
  10   5 -10   16.95    1.25
   9  -5 -10    1.32    0.80
   9   5 -10    1.19    0.52
   8  -5 -10   76.51    3.16
   8   5 -10   74.38    2.54
   8   5 -10   72.16    2.52
   7  -5 -10    1.09    0.66
   7   5 -10    1.73    0.43
   7   5 -10    1.16    0.34
  -7   5  10    1.35    0.61
  -6  -5  10   38.75    1.42
   6  -5 -10   39.36    2.02
   6   5 -10   40.72    1.42
  -6   5  10   37.34    1.99
   6   5 -10   39.80    1.43
   5  -5 -10    5.87    0.86
  -5  -5  10    6.36    0.49
   5  -5 -10    7.08    0.90
  -5   5  10    7.06    0.92
   5   5 -10    7.15    0.47
   5   5 -10    6.52    0.48
   4  -5 -10   73.17    2.76
   4  -5 -10   72.49    2.74
  -4  -5  10   71.21    2.04
  -4   5  10   74.58    2.79
   3  -5 -10    0.78    0.49
   3  -5 -10    1.44    0.52
  -3   5  10    0.84    0.49
  -3   5  10    1.34    0.49
   2  -5 -10   89.35    3.16
   2  -5 -10   96.09    3.22
  -2   5  10   89.67    3.18
  -2   5  10   93.08    3.14
   1  -5 -10   16.42    1.14
   1  -5 -10   16.51    1.16
  -1   5  10   17.44    1.15
  -1   5  10   17.52    1.18
   0  -5 -10   25.90    1.40
   0  -5 -10   24.60    1.39
   0  -5  10   27.04    0.94
   0   5 -10   26.76    0.92
   0   5  10   27.49    1.49
   0   5  10   25.09    1.42
   1  -5  10    2.88    0.37
  -1  -5 -10    3.17    0.63
  -1  -5 -10    2.55    0.59
   1   5  10    1.80    0.52
  -1   5 -10    2.59    0.36
   2  -5  10   10.76    0.73
  -2  -5 -10   10.58    1.01
  -2  -5 -10   11.89    1.03
   2   5  10   10.89    0.96
  -2   5 -10   11.35    0.72
  -3  -5 -10   -0.14    0.40
   3  -5  10   -0.04    0.30
  -3  -5 -10    0.23    0.48
   3   5  10    0.15    0.41
  -3   5 -10    0.35    0.32
   4  -5  10   56.15    2.14
  -4   5 -10   56.86    2.13
   4   5  10   56.09    2.34
   5  -5  10    0.19    0.46
   5   5  10    0.92    0.55
  -5   5 -10    0.35    0.38
   6  -5  10    3.61    0.73
  -6   5 -10    4.11    0.71
   6   5  10    4.80    0.88
   7  -5  10    1.93    0.69
  -7   5 -10    2.13    0.64
   7   5  10    1.62    0.69
   8  -5  10    6.09    1.04
   8   5  10    9.43    1.26
   9  -5  10    2.10    0.80
   9   5  10    2.43    0.87
  10  -5  10    0.56    0.73
  10   5  10    1.28    0.76
  11  -5  10    1.64    0.87
  11   5  10    0.22    0.76
  12   6 -10    1.11    0.68
  11  -6 -10    5.41    1.18
  11   6 -10    5.25    0.86
  10  -6 -10    0.41    0.67
  10   6 -10   -0.22    0.45
   9  -6 -10    0.62    0.71
   9   6 -10    0.14    0.43
   8  -6 -10    8.03    1.18
   8   6 -10    8.40    0.77
  -8   6  10    9.24    1.20
   7  -6 -10    0.31    0.65
   7   6 -10    0.11    0.32
  -7   6  10   -0.29    0.52
   7   6 -10    0.05    0.25
  -6  -6  10    7.83    0.56
   6  -6 -10    9.44    1.16
   6   6 -10    8.36    0.53
  -6   6  10    7.49    1.01
   6   6 -10    7.97    0.55
   5  -6 -10    0.89    0.61
  -5   6  10    1.03    0.57
   4  -6 -10   21.02    1.41
  -4   6  10   21.52    1.44
   3  -6 -10    5.26    0.81
   3  -6 -10    6.23    0.87
  -3   6  10    4.56    0.74
   2  -6 -10   33.15    1.69
   2  -6 -10   35.81    1.74
  -2   6  10   34.22    1.74
  -2   6  10   36.58    1.70
   1  -6 -10    2.43    0.63
   1  -6 -10    2.76    0.62
  -1   6  10    2.59    0.63
  -1   6  10    3.64    0.70
   0  -6  10    8.71    0.46
   0  -6 -10    8.76    0.94
   0  -6 -10    8.75    0.96
   0   6  10    8.41    0.94
   0   6 -10    9.25    0.43
   0   6  10    7.38    0.89
   1  -6  10   26.04    1.05
  -1  -6 -10   26.21    1.49
  -1  -6 -10   28.50    1.54
   1   6  10   29.48    1.56
  -1   6 -10   27.43    1.03
   2  -6  10   23.47    1.10
  -2  -6 -10   24.63    1.46
  -2   6 -10   25.03    1.07
   2   6  10   25.10    1.43
  -3  -6 -10   19.48    1.37
   3  -6  10   19.74    1.09
  -3   6 -10   19.59    1.03
   3   6  10   21.71    1.38
  -4  -6 -10   27.90    1.64
   4  -6  10   29.00    1.44
   4   6  10   28.33    1.61
  -4   6 -10   29.23    1.36
   5  -6  10    3.76    0.69
   5   6  10    3.36    0.75
   6  -6  10   59.74    2.51
  -6   6 -10   62.75    2.49
   6   6  10   62.34    2.71
   7  -6  10   14.06    1.34
  -7   6 -10   14.98    1.23
   7   6  10   15.31    1.51
   8  -6  10   23.92    1.67
   8   6  10   18.78    1.60
   9  -6  10   19.88    1.68
   9   6  10   21.42    1.96
  10  -6  10   15.75    1.65
  10   6  10   14.19    1.67
  11  -6  10   14.85    1.72
  11   6  10   21.70    2.13
  11  -7 -10   35.00    2.45
  11   7 -10   32.39    1.71
  10  -7 -10    2.74    0.94
  10   7 -10    2.05    0.61
   9  -7 -10   11.97    1.47
   9   7 -10   13.09    0.97
   8  -7 -10    7.25    1.17
  -8   7  10    7.87    1.19
   8   7 -10    6.82    0.66
   7  -7 -10   54.61    2.65
   7   7 -10   55.40    1.82
  -7   7  10   59.20    2.71
   7   7 -10   57.05    1.83
   6  -7 -10   11.80    1.31
  -6  -7  10   10.66    0.57
  -6   7  10   10.75    1.24
   5  -7 -10   63.34    2.72
  -5   7  10   64.38    2.73
   4  -7 -10   23.57    1.54
  -4   7  10   23.41    1.53
   3  -7 -10   28.96    1.66
  -3   7  10   28.05    1.63
   2  -7 -10   11.91    1.15
  -2   7  10   10.23    1.07
   1  -7 -10   53.34    2.33
  -1   7  10   60.58    2.38
  -1   7  10   55.02    2.37
   0  -7 -10   27.13    1.55
   0   7  10   25.93    1.51
   0   7  10   26.13    1.56
  -1  -7 -10   35.71    1.78
   1  -7  10   33.71    1.22
   1  -7  10   32.62    1.21
   1   7  10   34.29    1.77
  -1   7 -10   33.65    1.18
   2  -7  10   -0.45    0.24
  -2  -7 -10   -0.64    0.43
   2  -7  10    0.17    0.30
  -2   7 -10   -0.11    0.22
   2   7  10    0.56    0.49
  -3  -7 -10   13.45    1.24
   3  -7  10   12.02    0.89
  -3   7 -10   12.21    0.81
   3   7  10   12.12    1.18
   4  -7  10    6.68    0.78
  -4  -7 -10    8.39    1.04
  -4   7 -10    8.98    0.85
   4   7  10    5.68    0.87
  -5  -7 -10    8.69    1.10
   5  -7  10   10.90    1.06
   5   7  10   10.81    1.20
   6  -7  10   -0.70    0.46
   6   7  10    1.16    0.68
  -6   7 -10   -0.26    0.37
   7  -7  10    4.28    0.85
   7   7  10    5.78    1.03
  -7   7 -10    5.63    0.91
   8  -7  10    3.98    0.89
   8   7  10    3.78    0.95
   9  -7  10   10.51    1.34
   9   7  10    9.86    1.34
  10  -7  10   -0.07    0.66
  10   7  10   -0.86    0.65
  11  -7  10    5.07    1.15
  11   7  10    6.13    1.27
  11  -8 -10    0.89    0.85
  11   8 -10    0.60    0.51
  10  -8 -10    0.65    0.86
  10   8 -10    0.67    0.48
   9  -8 -10    3.14    1.01
   9   8 -10    4.71    0.62
   8  -8 -10    4.39    1.02
  -8   8  10    4.53    1.05
   8   8 -10    6.54    0.60
   7  -8 -10    4.11    0.99
  -7  -8  10    4.47    0.45
  -7   8  10    4.71    1.00
   6  -8 -10    0.69    0.72
  -6   8  10    1.59    0.70
   5  -8 -10    0.30    0.65
  -5   8  10    1.13    0.67
   4  -8 -10   11.05    1.25
  -4   8  10    7.75    1.03
   3  -8 -10    6.38    0.94
  -3   8  10    5.22    0.87
   2  -8 -10    0.28    0.57
  -2   8  10   -0.54    0.45
   1  -8 -10    9.65    1.09
  -1   8  10    9.27    1.07
   0  -8 -10    0.04    0.48
   0   8  10    0.36    0.48
   1  -8  10    0.36    0.25
  -1  -8 -10    0.75    0.53
   1  -8  10    0.28    0.24
  -1   8 -10    0.11    0.19
   1   8  10    0.35    0.50
  -2  -8 -10    9.87    1.11
   2  -8  10    9.69    0.71
   2  -8  10    9.46    0.73
  -2   8 -10    9.79    0.65
   2   8  10    7.69    1.01
   3  -8  10   12.91    0.92
  -3  -8 -10   13.37    1.27
   3   8  10   12.99    1.28
  -3   8 -10   12.70    0.84
   4  -8  10    9.06    0.89
  -4  -8 -10    6.97    1.03
   4   8  10    9.94    1.15
  -4   8 -10    9.00    0.79
   5  -8  10    9.50    0.99
  -5  -8 -10    8.54    1.17
   5   8  10    6.61    0.99
   6  -8  10   -0.54    0.44
  -6  -8 -10   -1.31    0.71
   6   8  10   -0.75    0.51
  -7  -8 -10   32.10    2.28
   7  -8  10   33.82    1.91
   7   8  10   35.49    2.08
   8  -8  10   32.44    2.01
   8   8  10   36.56    2.22
   9  -8  10   16.78    1.67
   9   8  10   20.46    1.94
  10  -8  10    1.41    0.89
  10   8  10    1.35    0.91
  10  -9 -10   11.41    1.65
  10   9 -10   14.42    0.98
   9  -9 -10    0.05    0.78
   9   9 -10   -0.16    0.34
   8  -9 -10   36.82    2.38
  -8   9  10   38.26    2.33
   7  -9 -10    6.17    1.12
  -7   9  10    7.85    1.24
   6  -9 -10   68.35    3.15
  -6   9  10   76.63    3.25
   5  -9 -10   27.64    1.91
  -5   9  10   28.58    1.84
   4  -9 -10    6.17    1.00
  -4   9  10    4.18    0.88
   3  -9 -10   62.99    2.73
  -3   9  10   62.82    2.77
   2  -9 -10   27.88    1.75
  -2   9  10   31.97    1.84
   1  -9 -10   19.19    1.44
  -1   9  10   13.37    1.35
   0  -9 -10    3.68    0.82
   0   9  10    2.31    0.68
   1  -9  10    7.49    0.55
   1  -9  10    8.85    0.59
  -1  -9 -10    8.56    1.05
  -1   9 -10    8.71    0.51
   1   9  10    7.27    0.96
   2  -9  10   55.99    1.94
  -2  -9 -10   55.17    2.45
   2   9  10   56.90    2.49
  -2   9 -10   53.84    1.85
  -3  -9 -10   -0.55    0.59
   3  -9  10   -0.24    0.35
  -3   9 -10    0.36    0.32
   3   9  10    0.98    0.62
  -4  -9 -10   34.39    1.95
   4  -9  10   29.82    1.55
  -4   9 -10   33.17    1.51
   4   9  10   32.69    1.88
  -5  -9 -10    7.36    1.08
   5  -9  10    9.05    0.99
   5   9  10    8.92    1.19
   6  -9  10    0.51    0.52
  -6  -9 -10    0.29    0.70
   6   9  10    0.00    0.60
  -7  -9 -10   15.46    1.58
   7  -9  10   15.21    1.43
   7   9  10   15.10    1.52
  -8  -9 -10   -2.58    0.79
   8  -9  10    0.81    0.68
   8   9  10   -0.44    0.67
   9   9  10    0.63    0.80
   9 -10 -10   -0.53    0.79
   8 -10 -10    1.31    0.87
  -8  10  10    1.97    0.85
   7 -10 -10    1.33    0.84
  -7  10  10    0.03    0.60
   6 -10 -10    1.18    0.82
  -6  10  10    1.94    0.85
   5 -10 -10    2.78    0.90
  -5  10  10    1.69    0.76
   4 -10 -10    3.48    0.89
  -4  10  10    4.14    0.92
   3 -10 -10    1.93    0.77
  -3  10  10    0.71    0.62
   2 -10 -10    3.90    0.89
  -2  10  10    3.94    0.85
   1 -10 -10    2.83    0.78
  -1  10  10    2.26    0.74
   0 -10 -10   19.73    1.55
   0  10  10   17.14    1.47
   1 -10  10    0.45    0.30
  -1 -10 -10    0.59    0.68
   1 -10  10    0.71    0.29
   1  10  10    1.27    0.63
  -1  10 -10    0.95    0.26
  -2 -10 -10   23.35    1.62
   2 -10  10   21.12    1.08
  -2  10 -10   20.78    0.98
   2  10  10   23.32    1.65
  -3 -10 -10    1.17    0.66
   3 -10  10    0.10    0.36
   3  10  10    0.24    0.56
   4 -10  10   24.40    1.39
  -4 -10 -10   24.34    1.72
   4  10  10   22.94    1.67
   5 -10  10    3.45    0.70
  -5 -10 -10    2.10    0.81
   5  10  10    1.50    0.72
  -6 -10 -10   15.24    1.59
   6  10  10   12.82    1.46
  -7 -10 -10   -0.18    0.77
   7  10  10    0.19    0.67
  -8 -10 -10   20.68    1.96
   8  10  10   21.56    1.85
  -9 -10 -10    2.81    1.12
   9  10  10    0.58    0.88
   9 -11 -10   18.75    2.04
   8 -11 -10   12.60    1.63
  -8  11  10   14.17    1.68
   7 -11 -10    9.99    1.45
  -7  11  10   10.15    1.43
   6 -11 -10   14.68    1.66
  -6  11  10   13.98    1.64
   5 -11 -10   10.50    1.40
  -5  11  10    9.99    1.31
   4 -11 -10   34.75    2.17
  -4  11  10   34.47    2.12
   3 -11 -10   13.96    1.46
  -3  11  10   16.70    1.63
   2 -11 -10   19.88    1.64
  -2  11  10   18.68    1.60
   1 -11 -10   19.15    1.56
  -1  11  10   19.27    1.53
   0 -11 -10   20.76    1.63
   0  11  10   22.56    1.65
  -1 -11 -10    8.76    1.15
   1  11  10    8.14    1.16
  -1  11 -10    8.53    0.54
  -2 -11 -10    1.09    0.72
   2  11  10    2.65    0.81
  -3 -11 -10   10.65    1.27
   3  11  10    9.31    1.24
  -4 -11 -10    0.77    0.71
   4  11  10   -0.36    0.63
  -5 -11 -10    0.10    0.65
   5  11  10    0.69    0.71
  -6 -11 -10    5.49    1.10
   6  11  10    6.77    1.12
  -7 -11 -10    0.40    0.79
   7  11  10    1.35    0.79
  -8 -11 -10    1.46    1.00
   8  11  10    1.41    0.82
   8 -12 -10    4.32    1.18
  -8  12  10    4.32    1.18
   7 -12 -10    3.91    1.20
  -7  12  10    2.56    0.94
   6 -12 -10    0.45    0.89
  -6  12  10    1.77    0.86
   5 -12 -10    2.20    0.96
  -5  12  10    0.48    0.68
   4 -12 -10    2.57    0.89
  -4  12  10    3.98    0.96
   3 -12 -10    0.99    0.77
  -3  12  10    1.02    0.69
   2 -12 -10    0.02    0.62
  -2  12  10    0.34    0.66
   1 -12 -10    2.03    0.80
  -1  12  10    1.76    0.81
   0 -12 -10    2.01    0.79
   0  12  10    1.27    0.74
  -1 -12 -10   20.03    1.79
   1  12  10   21.57    1.70
  -2 -12 -10    0.00    0.65
   2  12  10    0.74    0.66
  -3 -12 -10   19.63    1.69
   3  12  10   19.93    1.70
  -4 -12 -10    4.10    0.98
   4  12  10    4.88    1.02
  -5 -12 -10    5.56    1.12
   5  12  10    4.77    1.05
  -6 -12 -10    0.90    0.81
   6  12  10    0.53    0.71
  -7 -12 -10   11.06    1.52
   7  12  10   15.00    1.70
   6 -13 -10    2.81    1.07
  -6  13  10    3.98    1.02
   5 -13 -10   26.20    2.14
  -5  13  10   23.20    1.96
   4 -13 -10    4.77    1.17
  -4  13  10    6.01    1.13
   3 -13 -10   10.52    1.40
  -3  13  10   12.42    1.48
   2 -13 -10   23.09    1.85
  -2  13  10   26.95    1.95
   1 -13 -10   16.00    1.66
  -1  13  10   15.63    1.63
   0 -13 -10    2.67    0.88
   0  13  10    2.60    0.82
  -1 -13 -10    5.33    1.04
   1  13  10    6.09    1.08
  -2 -13 -10    1.29    0.81
   2  13  10    0.67    0.68
  -3 -13 -10    2.85    1.03
   3  13  10    3.48    0.93
  -4 -13 -10    3.92    1.01
   4  13  10    2.22    0.88
  -5 -13 -10   -0.41    0.70
   5  13  10    2.14    0.90
   6  13  10    3.25    1.04
   5 -14 -10    1.04    0.90
  -5  14  10    1.76    0.86
   4 -14 -10    0.63    0.90
  -4  14  10    0.73    0.77
   3 -14 -10    3.35    1.06
  -3  14  10    2.62    0.92
   2 -14 -10   -0.56    0.70
  -2  14  10    0.56    0.73
   1 -14 -10    4.73    1.08
  -1  14  10    2.45    0.92
   0 -14 -10    7.32    1.24
   0  14  10    7.46    1.25
  -1 -14 -10   -0.39    0.71
   1  14  10   -0.33    0.72
  -2 -14 -10    2.84    0.94
   2  14  10    1.21    0.76
  -3 -14 -10    0.87    0.87
   3  14  10    0.47    0.79
   4  14  10    9.28    1.38
   1 -15 -10    0.00    0.83
  -1  15  10    0.84    0.72
   0  15  10    4.30    1.07
   1  15  10    0.41    0.74
  12   0 -11   -0.61    0.61
  11   0 -11    5.49    0.99
  10   0 -11   -0.56    0.49
   9   0 -11  109.55    3.89
   9   0 -11  114.49    3.94
   8   0 -11    0.17    0.47
   8   0 -11    0.15    0.42
   7   0 -11   28.54    1.46
   7   0 -11   26.28    1.46
   6   0 -11    0.43    0.32
   6   0 -11    0.13    0.38
  -6   0  11   -0.33    0.34
  -5   0  11  192.41    5.60
  -5   0  11  194.19    5.59
   5   0 -11  189.19    5.59
   5   0 -11  194.10    5.60
   4   0 -11    0.37    0.31
  -4   0  11    0.62    0.36
  -4   0  11    0.14    0.29
   4   0 -11    0.19    0.35
   3   0 -11   58.49    2.04
  -3   0  11   56.23    2.04
   3   0 -11   57.51    2.05
  -3   0  11   60.57    2.05
   2   0 -11   -0.41    0.26
   2   0 -11    0.21    0.31
  -2   0  11    0.50    0.32
  -2   0  11   -0.24    0.28
   1   0 -11  103.99    3.19
   1   0 -11  104.44    3.23
  -1   0  11  103.50    3.23
   0   0 -11   -0.18    0.33
   0   0  11    0.25    0.31
   0   0 -11    0.10    0.29
  -1   0 -11  146.99    4.35
   1   0  11  150.41    4.38
  -1   0 -11  145.10    4.36
  -2   0 -11   -0.07    0.23
   2   0  11   -0.02    0.34
   3   0  11    8.22    0.84
  -3   0 -11    8.91    0.79
   4   0  11    0.04    0.39
  -4   0 -11   -0.20    0.34
  -5   0 -11    6.66    0.85
   5   0  11    5.94    0.82
   6   0  11   -1.23    0.38
  -6   0 -11   -0.33    0.39
   7   0  11    6.74    0.94
   8   0  11    0.60    0.62
   9   0  11   -0.24    0.59
  10   0  11    0.36    0.69
  11   0  11    2.67    0.95
  12   0  11    0.71    0.80
  12  -1 -11    3.61    0.95
  12   1 -11    3.98    0.95
  11  -1 -11    1.32    0.72
  11   1 -11    1.03    0.72
  10  -1 -11   13.48    1.40
  10   1 -11   13.37    1.32
   9  -1 -11   25.03    1.63
   9  -1 -11   22.19    1.52
   9   1 -11   26.59    1.58
   9   1 -11   24.76    1.46
   8  -1 -11    4.87    0.76
   8  -1 -11    5.73    0.88
   8   1 -11    6.06    0.79
   8   1 -11    6.25    0.83
   7  -1 -11    0.82    0.49
   7  -1 -11    0.53    0.42
   7   1 -11    0.84    0.40
   7   1 -11    1.11    0.47
   6  -1 -11    3.45    0.60
   6  -1 -11    3.37    0.64
   6   1 -11    3.73    0.56
   6   1 -11    3.84    0.59
  -6   1  11    3.67    0.66
  -5  -1  11   38.07    1.56
   5  -1 -11   38.47    1.69
  -5  -1  11   38.39    1.57
  -5   1  11   37.70    1.68
   5   1 -11   37.61    1.56
   5   1 -11   40.16    1.60
   4  -1 -11    2.46    0.49
   4  -1 -11    3.31    0.59
  -4  -1  11    2.69    0.46
  -4  -1  11    3.31    0.51
   4   1 -11    2.46    0.46
  -4   1  11    3.41    0.55
  -4   1  11    2.45    0.48
   4   1 -11    2.66    0.48
  -3  -1  11   64.68    2.18
  -3  -1  11   66.37    2.17
   3  -1 -11   65.66    2.32
   3  -1 -11   66.74    2.32
   3   1 -11   69.20    2.20
  -3   1  11   65.29    2.29
  -3   1  11   64.05    2.32
   3   1 -11   67.32    2.19
   2  -1 -11   32.11    1.45
   2  -1 -11   33.36    1.41
  -2  -1  11   33.70    1.32
  -2  -1  11   33.45    1.32
  -2   1  11   34.27    1.47
   2   1 -11   32.40    1.32
   2   1 -11   33.06    1.30
  -2   1  11   33.93    1.42
  -1  -1  11   13.54    0.82
   1  -1 -11   14.18    0.88
   1  -1 -11   12.72    0.93
   1   1 -11   15.15    0.82
  -1   1  11   15.36    0.98
   1   1 -11   14.70    0.85
  -1   1  11   15.30    0.95
   0  -1 -11   21.71    1.10
   0  -1 -11   21.81    1.17
   0  -1  11   21.96    1.04
   0   1 -11   22.54    1.04
   0   1 -11   22.04    1.08
   0   1  11   22.64    1.14
  -1  -1 -11   64.51    2.33
   1  -1  11   68.07    2.25
  -1   1 -11   68.05    2.24
   1   1  11   62.75    2.29
  -1   1 -11   68.01    2.28
  -2  -1 -11   27.28    1.32
   2  -1  11   26.56    1.26
  -2   1 -11   29.60    1.29
   2   1  11   24.95    1.31
  -3  -1 -11   32.00    1.50
   3  -1  11   30.74    1.44
   3   1  11   31.70    1.53
  -4  -1 -11   86.72    3.05
   4  -1  11   88.04    3.04
   4   1  11   90.49    3.10
  -4   1 -11   87.12    3.02
   5  -1  11   17.63    1.25
  -5  -1 -11   18.45    1.25
   5   1  11   18.35    1.26
  -5   1 -11   18.53    1.22
   6  -1  11   14.54    1.18
   6   1  11   12.05    1.19
  -6   1 -11   15.46    1.16
   7  -1  11    2.39    0.72
   7   1  11    2.46    0.72
   8  -1  11    8.93    1.18
   8   1  11    9.86    1.23
   9  -1  11   35.68    2.18
   9   1  11   36.70    2.16
  10  -1  11   18.75    1.80
  10   1  11   20.02    1.75
  11  -1  11   20.53    1.99
  11   1  11   23.13    1.94
  12  -1  11    9.88    1.53
  12   1  11    9.66    1.47
  12  -2 -11   42.60    2.47
  12   2 -11   38.92    2.20
  11  -2 -11    0.59    0.73
  11   2 -11    0.42    0.60
  10  -2 -11   25.32    1.78
  10   2 -11   24.16    1.60
   9  -2 -11   -0.34    0.57
   9  -2 -11    0.27    0.54
   9   2 -11    0.09    0.49
   8  -2 -11   67.54    2.68
   8  -2 -11   63.49    2.67
   8   2 -11   65.21    2.48
   8   2 -11   64.20    2.44
   7  -2 -11    1.09    0.54
   7  -2 -11    0.33    0.43
   7   2 -11    0.17    0.39
   7   2 -11    0.86    0.39
  -7   2  11    0.79    0.49
   6  -2 -11   45.84    1.94
   6  -2 -11   41.76    1.92
  -6   2  11   44.58    1.97
   6   2 -11   45.29    1.75
   6   2 -11   43.95    1.72
  -5  -2  11   20.97    1.03
   5  -2 -11   20.77    1.24
   5  -2 -11   20.30    1.21
   5   2 -11   22.42    1.06
   5   2 -11   19.36    1.01
  -5   2  11   20.08    1.25
  -4  -2  11   13.03    0.78
  -4  -2  11   13.04    0.79
   4  -2 -11   15.19    1.01
   4  -2 -11   12.83    1.01
   4   2 -11   13.71    0.79
  -4   2  11   15.59    0.99
  -4   2  11   14.00    1.02
   4   2 -11   13.95    0.80
  -3  -2  11   21.62    0.97
  -3  -2  11   22.58    0.98
   3  -2 -11   21.38    1.22
   3   2 -11   22.09    0.97
  -3   2  11   22.47    1.23
  -3   2  11   23.39    1.17
   3   2 -11   24.54    1.01
   2  -2 -11   49.53    1.96
  -2  -2  11   50.28    1.69
  -2   2  11   50.81    1.90
   2   2 -11   51.75    1.69
   2   2 -11   49.80    1.67
  -2   2  11   49.20    1.95
   1  -2 -11   -0.39    0.20
  -1  -2  11    0.21    0.24
   1  -2 -11    0.13    0.38
  -1   2  11    0.56    0.38
   1   2 -11    0.11    0.24
  -1   2  11   -0.34    0.19
   1   2 -11    0.77    0.31
   0  -2 -11   70.86    2.51
   0  -2  11   71.99    2.27
   0   2 -11   73.45    2.29
   0   2 -11   68.59    2.24
   0   2  11   70.10    2.48
  -1  -2 -11    1.58    0.45
   1  -2  11    1.94    0.40
  -1  -2 -11    1.82    0.51
   1   2  11    2.11    0.48
  -1   2 -11    1.50    0.37
  -2  -2 -11   16.18    1.05
  -2  -2 -11   17.77    1.17
   2  -2  11   15.17    0.91
  -2   2 -11   16.89    0.95
   2   2  11   14.28    1.04
   3  -2  11   37.67    1.60
  -3  -2 -11   39.38    1.70
  -3   2 -11   37.88    1.58
   3   2  11   34.01    1.68
  -4  -2 -11   10.81    0.94
   4  -2  11   11.39    0.97
   4   2  11   10.09    1.05
  -4   2 -11    9.94    0.87
   5  -2  11   15.80    1.15
  -5  -2 -11   16.18    1.18
  -5   2 -11   16.82    1.16
   5   2  11   17.17    1.24
   6  -2  11   10.68    1.10
   6   2  11    8.62    1.08
  -6   2 -11   10.28    1.08
   7  -2  11    3.16    0.74
   7   2  11    3.73    0.84
   8  -2  11    5.82    1.00
   8   2  11    6.63    1.06
   9  -2  11   21.87    1.76
   9   2  11   19.48    1.64
  10  -2  11    2.75    0.94
  10   2  11    4.99    1.04
  11  -2  11    0.44    0.77
  11   2  11    0.66    0.73
  12  -2  11    7.41    1.35
  12   2  11    8.37    1.43
  12  -3 -11    0.66    0.77
  12   3 -11    0.23    0.63
  11  -3 -11    2.88    0.96
  11   3 -11    3.55    0.83
  10  -3 -11    5.99    1.08
  10   3 -11    6.37    0.91
   9  -3 -11    2.99    0.86
   9   3 -11    3.52    0.69
   8  -3 -11   24.75    1.63
   8   3 -11   22.28    1.27
   8   3 -11   25.07    1.36
   7  -3 -11    1.25    0.52
   7  -3 -11    3.03    0.71
  -7   3  11    1.21    0.57
   7   3 -11    1.45    0.45
   7   3 -11    1.12    0.38
   6  -3 -11   11.31    1.12
  -6  -3  11   10.08    0.76
   6  -3 -11   11.60    1.12
   6   3 -11   10.06    0.74
  -6   3  11    8.77    0.98
   6   3 -11   10.77    0.79
  -5  -3  11   10.20    0.72
   5  -3 -11   11.45    1.05
   5  -3 -11   11.33    0.97
  -5   3  11   10.73    1.03
   5   3 -11    9.03    0.70
   5   3 -11   10.47    0.69
   4  -3 -11   14.74    1.11
  -4  -3  11   15.27    0.77
   4  -3 -11   15.51    1.09
  -4  -3  11   15.04    0.77
  -4   3  11   16.63    1.14
   4   3 -11   15.37    0.76
   4   3 -11   15.29    0.77
  -3  -3  11    3.30    0.41
  -3  -3  11    3.00    0.36
   3  -3 -11    2.59    0.55
   3  -3 -11    3.19    0.60
  -3   3  11    3.02    0.52
   3   3 -11    3.21    0.39
  -3   3  11    3.44    0.64
   3   3 -11    3.52    0.39
  -2  -3  11   37.03    1.28
   2  -3 -11   37.10    1.64
   2  -3 -11   40.82    1.73
  -2   3  11   36.35    1.68
   2   3 -11   39.04    1.29
   2   3 -11   37.37    1.28
  -2   3  11   39.38    1.63
   1  -3 -11   -0.28    0.31
   1  -3 -11    0.24    0.40
  -1  -3  11   -0.13    0.19
   1   3 -11    0.10    0.22
  -1   3  11   -0.15    0.36
  -1   3  11   -0.22    0.31
   1   3 -11   -0.25    0.20
   0  -3 -11   98.74    3.33
   0  -3 -11  102.41    3.39
   0  -3  11  104.90    3.03
   0   3 -11  102.07    3.03
   0   3  11  102.29    3.37
   0   3 -11  104.70    3.02
  -1  -3 -11    5.87    0.76
  -1  -3 -11    5.95    0.73
   1  -3  11    7.08    0.59
  -1   3 -11    7.46    0.61
   1   3  11    6.59    0.79
  -2  -3 -11   28.00    1.40
  -2  -3 -11   24.55    1.38
   2  -3  11   28.12    1.22
   2   3  11   24.82    1.35
  -2   3 -11   26.48    1.20
  -3  -3 -11   18.03    1.18
   3  -3  11   16.94    1.03
  -3   3 -11   17.59    1.00
   3   3  11   17.89    1.17
  -4  -3 -11   39.42    1.78
   4  -3  11   34.54    1.60
   4   3  11   32.43    1.70
   5  -3  11   37.18    1.79
  -5   3 -11   36.20    1.74
   5   3  11   41.75    1.97
   6  -3  11    0.25    0.50
  -6   3 -11    0.11    0.39
   6   3  11    0.44    0.53
   7  -3  11   12.84    1.28
  -7   3 -11   10.38    1.15
   7   3  11   10.38    1.25
   8  -3  11   35.01    2.00
   8   3  11   32.30    1.99
   9  -3  11    3.07    0.90
   9   3  11    1.69    0.82
  10  -3  11   20.01    1.76
  10   3  11   18.70    1.85
  11  -3  11    3.33    1.04
  11   3  11    2.96    1.04
  12  -4 -11   11.60    1.56
  12   4 -11    9.67    1.18
  11  -4 -11   21.28    1.86
  11   4 -11   19.68    1.46
  10  -4 -11    7.11    1.20
  10   4 -11   10.26    1.09
   9  -4 -11   36.57    2.14
   9   4 -11   41.85    1.83
   8  -4 -11   18.70    1.52
   8   4 -11   15.61    1.02
  -8   4  11   16.23    1.41
   8   4 -11   17.69    1.10
   7  -4 -11   47.79    2.24
  -7   4  11   46.31    2.20
   7   4 -11   43.89    1.72
   7   4 -11   46.24    1.76
   6  -4 -11    3.06    0.69
  -6  -4  11    5.18    0.53
   6  -4 -11    5.39    0.87
   6   4 -11    5.82    0.56
   6   4 -11    4.51    0.54
  -6   4  11    5.43    0.87
  -5  -4  11    1.59    0.33
   5  -4 -11    1.97    0.54
   5  -4 -11    1.24    0.58
   5   4 -11    1.45    0.33
   5   4 -11    1.57    0.32
  -5   4  11    0.96    0.52
  -4  -4  11   31.58    1.12
   4  -4 -11   32.08    1.61
   4  -4 -11   28.98    1.60
   4   4 -11   31.82    1.09
  -4   4  11   31.23    1.61
   4   4 -11   30.73    1.10
   3  -4 -11    3.26    0.64
  -3  -4  11    4.57    0.37
   3  -4 -11    4.62    0.70
  -3   4  11    5.68    0.77
   3   4 -11    4.69    0.36
   3   4 -11    4.80    0.38
  -3   4  11    4.66    0.73
   2  -4 -11   12.57    1.01
   2  -4 -11   12.47    1.12
  -2  -4  11   13.13    0.56
   2   4 -11   12.11    0.55
  -2   4  11   13.28    0.96
   2   4 -11   12.72    0.55
  -2   4  11   12.22    1.03
   1  -4 -11   32.31    1.52
  -1  -4  11   30.43    1.07
   1  -4 -11   32.43    1.60
   1   4 -11   31.35    1.08
  -1   4  11   29.74    1.54
  -1   4  11   31.29    1.54
   1   4 -11   31.84    1.06
   0  -4 -11    3.03    0.62
   0  -4  11    3.68    0.40
   0  -4 -11    2.79    0.57
   0   4  11    3.58    0.63
   0   4 -11    3.01    0.37
   0   4 -11    3.09    0.39
   1  -4  11   19.99    0.92
  -1  -4 -11   19.94    1.22
  -1  -4 -11   19.42    1.20
   1   4  11   18.54    1.19
  -1   4 -11   18.80    0.90
  -2  -4 -11   17.22    1.19
  -2  -4 -11   18.17    1.17
   2  -4  11   16.46    0.91
   2   4  11   16.05    1.13
  -2   4 -11   18.76    0.95
   3  -4  11    2.22    0.49
  -3  -4 -11    2.40    0.59
  -3  -4 -11    1.74    0.59
   3   4  11    1.64    0.54
  -3   4 -11    2.34    0.48
   4  -4  11    1.26    0.48
  -4   4 -11    1.43    0.42
   4   4  11    1.20    0.54
   5  -4  11   -0.03    0.43
   5   4  11    0.07    0.48
  -5   4 -11    0.11    0.37
   6  -4  11   19.86    1.43
   6   4  11   23.18    1.59
  -6   4 -11   22.97    1.40
   7  -4  11   15.16    1.34
   7   4  11   14.71    1.48
  -7   4 -11   15.73    1.27
   8  -4  11    4.55    0.93
   8   4  11    3.84    0.92
   9  -4  11    5.23    1.05
   9   4  11    5.95    1.07
  10  -4  11    6.13    1.18
  10   4  11    4.77    1.06
  11  -4  11    0.15    0.80
  11   4  11    1.89    0.90
  12  -5 -11    0.53    0.87
  12   5 -11    0.86    0.62
  11  -5 -11    0.95    0.76
  11   5 -11    1.12    0.62
  10  -5 -11    4.40    1.02
  10   5 -11    4.07    0.74
   9  -5 -11    6.08    1.12
   9   5 -11    6.87    0.80
   8  -5 -11    8.78    1.22
   8   5 -11    8.80    0.83
  -8   5  11    8.48    1.13
   7  -5 -11    8.80    1.16
   7   5 -11    9.21    0.68
   7   5 -11    8.76    0.74
  -7   5  11    8.85    1.12
   6  -5 -11    1.11    0.63
  -6  -5  11    0.62    0.29
  -6   5  11    1.63    0.62
   6   5 -11    0.79    0.28
   6   5 -11    0.41    0.30
  -5  -5  11   47.49    1.54
   5  -5 -11   49.25    2.18
   5  -5 -11   48.40    2.21
   5   5 -11   47.70    1.52
  -5   5  11   49.63    2.23
   5   5 -11   46.41    1.50
   4  -5 -11   19.23    1.29
  -4  -5  11   16.25    0.66
   4  -5 -11   17.88    1.28
  -4   5  11   18.42    1.30
   3  -5 -11   27.23    1.51
   3  -5 -11   23.77    1.44
  -3   5  11   26.94    1.51
   2  -5 -11    4.03    0.70
   2  -5 -11    2.63    0.58
  -2   5  11    2.61    0.61
  -2   5  11    3.56    0.63
  -1  -5  11   73.90    2.03
   1  -5 -11   71.56    2.67
   1  -5 -11   70.37    2.68
  -1   5  11   71.41    2.70
  -1   5  11   73.94    2.68
   0  -5 -11   11.90    1.02
   0  -5 -11   12.26    1.06
   0  -5  11   10.59    0.57
   0   5  11   11.23    1.06
   0   5 -11   10.25    0.55
   0   5 -11   10.78    0.59
   1  -5  11   82.76    2.53
  -1  -5 -11   83.49    2.99
  -1  -5 -11   84.85    3.01
   1   5  11   83.48    3.00
  -1   5 -11   83.49    2.53
   2  -5  11    7.76    0.69
  -2  -5 -11    6.65    0.87
  -2  -5 -11    7.25    0.88
  -2   5 -11    7.71    0.63
   2   5  11    8.60    0.97
   3  -5  11   31.67    1.42
  -3  -5 -11   33.02    1.74
  -3   5 -11   33.60    1.42
   3   5  11   30.24    1.63
   4  -5  11    6.13    0.74
  -4  -5 -11    7.00    0.99
   4   5  11    6.56    0.88
  -4   5 -11    7.47    0.80
   5  -5  11   49.37    2.14
   5   5  11   51.50    2.32
  -5   5 -11   51.82    2.12
   6  -5  11    3.39    0.72
  -6   5 -11    2.88    0.67
   6   5  11    3.56    0.81
   7  -5  11   46.64    2.26
   7   5  11   47.04    2.41
  -7   5 -11   48.76    2.24
   8  -5  11    0.92    0.65
   8   5  11    0.44    0.67
   9  -5  11   49.84    2.53
   9   5  11   45.58    2.57
  10  -5  11    1.99    0.84
  10   5  11    1.76    0.90
  11  -5  11   27.60    2.18
  11   5  11   27.38    2.15
  11  -6 -11   13.88    1.67
  11   6 -11   10.21    1.11
  10  -6 -11   11.39    1.52
  10   6 -11   10.87    1.02
   9  -6 -11   28.89    2.01
   9   6 -11   26.42    1.37
   8  -6 -11   23.14    1.81
  -8   6  11   22.89    1.76
   8   6 -11   23.41    1.17
   7  -6 -11   26.23    1.81
   7   6 -11   24.71    1.09
  -7   6  11   22.83    1.68
   7   6 -11   24.51    1.06
   6  -6 -11   33.70    1.93
  -6  -6  11   33.51    1.20
   6   6 -11   31.67    1.14
   6   6 -11   34.08    1.17
  -6   6  11   32.02    1.92
   5  -6 -11   14.75    1.30
  -5   6  11   15.97    1.31
   4  -6 -11   74.94    2.94
  -4   6  11   75.05    2.94
   3  -6 -11    2.79    0.67
  -3   6  11    2.43    0.64
   2  -6 -11   28.22    1.58
   2  -6 -11   28.89    1.56
  -2   6  11   26.20    1.53
   1  -6 -11   51.70    2.22
   1  -6 -11   52.65    2.21
  -1   6  11   50.36    2.21
   0  -6 -11   -0.32    0.40
   0  -6 -11    0.24    0.49
   0  -6  11    0.21    0.19
   0   6 -11    0.35    0.18
   0   6  11   -0.67    0.54
   0   6 -11    0.05    0.19
   0   6  11    0.76    0.48
  -1  -6 -11    1.93    0.61
   1  -6  11    2.33    0.36
   1   6  11    3.17    0.68
  -1   6 -11    3.13    0.38
  -2  -6 -11    0.07    0.46
   2  -6  11    0.24    0.30
   2   6  11   -0.41    0.43
  -2   6 -11    0.24    0.27
  -3  -6 -11    0.28    0.52
   3  -6  11    0.12    0.32
   3   6  11    0.32    0.46
  -3   6 -11    0.09    0.29
  -4  -6 -11    0.42    0.64
   4  -6  11    0.15    0.39
  -4   6 -11    0.50    0.35
   4   6  11    0.18    0.50
   5  -6  11    0.12    0.41
  -5  -6 -11    0.23    0.69
  -5   6 -11   -0.02    0.34
   5   6  11    0.12    0.52
   6  -6  11   39.04    1.97
   6   6  11   44.34    2.21
  -6   6 -11   37.60    1.88
   7  -6  11    4.47    0.85
   7   6  11    3.74    0.96
  -7   6 -11    3.81    0.78
   8  -6  11    0.17    0.60
   8   6  11   -0.76    0.52
   9  -6  11    2.83    0.87
   9   6  11    4.62    1.09
  10  -6  11    7.15    1.23
  10   6  11    8.56    1.42
  11  -6  11    4.24    1.10
  11   6  11    4.20    1.19
  11  -7 -11    0.27    0.81
  11   7 -11    1.20    0.58
  10  -7 -11    1.09    0.91
  10   7 -11    1.89    0.55
   9  -7 -11    1.79    0.89
   9   7 -11    2.24    0.53
   8  -7 -11    0.58    0.74
  -8   7  11   -1.50    0.51
   8   7 -11   -0.12    0.33
   7  -7 -11    0.78    0.73
   7   7 -11    0.33    0.21
   7   7 -11   -0.31    0.26
  -7   7  11    0.62    0.68
   6  -7 -11   19.67    1.62
  -6   7  11   17.40    1.50
   5  -7 -11    5.04    0.91
  -5   7  11    4.33    0.86
   4  -7 -11    6.55    1.00
  -4   7  11    6.71    0.99
   3  -7 -11    9.44    1.10
  -3   7  11   10.50    1.19
   2  -7 -11   70.80    2.81
  -2   7  11   70.41    2.81
   1  -7 -11    0.60    0.56
  -1   7  11    0.49    0.49
   0  -7 -11  102.89    3.58
   0   7  11   95.77    3.53
   1  -7  11    3.88    0.41
  -1  -7 -11    3.80    0.77
   1  -7  11    3.36    0.40
  -1   7 -11    4.53    0.42
   1   7  11    3.43    0.74
   2  -7  11   53.09    1.85
  -2  -7 -11   53.32    2.31
  -2   7 -11   50.64    1.78
   2   7  11   52.22    2.31
   3  -7  11    0.32    0.35
  -3  -7 -11    0.05    0.52
  -3   7 -11    0.36    0.32
   3   7  11    1.06    0.55
   4  -7  11   31.01    1.53
  -4  -7 -11   32.14    1.83
   4   7  11   30.49    1.78
  -4   7 -11   33.71    1.50
   5  -7  11    2.14    0.61
  -5  -7 -11    2.88    0.84
   5   7  11    1.65    0.70
   6  -7  11   99.28    3.64
  -6  -7 -11  104.20    3.99
  -6   7 -11  104.86    3.63
   6   7  11  106.97    3.96
   7  -7  11    0.90    0.61
   7   7  11    0.78    0.67
   8  -7  11   52.85    2.59
   8   7  11   54.59    2.75
   9  -7  11    0.31    0.63
   9   7  11    0.18    0.72
  10  -7  11   38.38    2.45
  10   7  11   42.43    2.51
  10  -8 -11    8.72    1.41
  10   8 -11   11.31    0.94
   9  -8 -11    4.04    1.06
   9   8 -11    2.88    0.50
   8  -8 -11   24.67    1.97
   8   8 -11   26.47    1.06
  -8   8  11   24.35    1.91
   7  -8 -11   17.16    1.68
  -7   8  11   16.26    1.60
   6  -8 -11   10.79    1.33
  -6   8  11   14.44    1.49
   5  -8 -11   18.18    1.52
  -5   8  11   16.04    1.53
   4  -8 -11    1.32    0.72
  -4   8  11   -0.08    0.57
   3  -8 -11    8.06    1.08
  -3   8  11    6.61    1.00
   2  -8 -11    4.08    0.83
  -2   8  11    5.22    0.90
   1  -8 -11    1.31    0.65
  -1   8  11    0.79    0.58
   0  -8 -11   27.85    1.68
   0   8  11   27.58    1.65
  -1  -8 -11    0.05    0.54
   1  -8  11    0.06    0.23
   1  -8  11    0.34    0.25
  -1   8 -11   -0.04    0.18
   1   8  11    0.00    0.49
   2  -8  11    5.23    0.58
   2  -8  11    5.57    0.58
  -2  -8 -11    4.76    0.85
  -2   8 -11    5.54    0.55
   2   8  11    3.82    0.78
  -3  -8 -11    0.53    0.59
   3  -8  11   -0.12    0.36
  -3   8 -11    0.85    0.34
   3   8  11   -0.48    0.51
  -4  -8 -11    1.05    0.70
   4  -8  11    0.13    0.42
   4   8  11   -0.20    0.49
  -4   8 -11    0.81    0.36
   5  -8  11   12.81    1.18
  -5  -8 -11   15.22    1.47
   5   8  11   12.42    1.36
  -6  -8 -11    2.31    0.91
   6  -8  11    3.73    0.75
   6   8  11    2.91    0.83
  -7  -8 -11    2.84    1.05
   7  -8  11    2.76    0.75
   7   8  11    2.95    0.86
   8  -8  11   -0.11    0.61
   8   8  11    1.12    0.81
   9  -8  11    0.93    0.74
   9   8  11    1.66    0.89
  10   8  11    0.51    0.82
  10  -9 -11   -0.31    0.79
   9  -9 -11    1.97    0.98
   8  -9 -11    4.53    1.09
  -8   9  11    4.24    1.07
   7  -9 -11    2.34    0.86
  -7   9  11    3.77    0.90
   6  -9 -11   13.20    1.51
  -6   9  11   12.33    1.38
   5  -9 -11    2.03    0.82
  -5   9  11    1.78    0.73
   4  -9 -11    1.07    0.68
  -4   9  11    1.05    0.67
   3  -9 -11    8.70    1.16
  -3   9  11    7.38    1.11
   2  -9 -11    7.48    1.03
  -2   9  11    8.17    1.10
   1  -9 -11    5.30    0.95
  -1   9  11    6.24    0.98
   0  -9 -11   10.53    1.20
   0   9  11    9.36    1.16
  -1  -9 -11   41.34    2.07
   1  -9  11   37.37    1.31
   1  -9  11   35.63    1.30
   1   9  11   37.88    2.01
  -1   9 -11   37.23    1.24
   2  -9  11   26.63    1.21
  -2  -9 -11   28.62    1.76
   2   9  11   31.08    1.85
  -2   9 -11   28.54    1.16
  -3  -9 -11   39.67    2.15
   3  -9  11   41.04    1.68
  -3   9 -11   38.61    1.57
   3   9  11   39.17    2.11
  -4  -9 -11   26.44    1.79
   4  -9  11   24.76    1.38
   4   9  11   23.89    1.70
  -5  -9 -11   48.83    2.53
   5  -9  11   49.39    2.19
   5   9  11   54.81    2.55
   6  -9  11    8.64    1.05
  -6  -9 -11    7.28    1.18
   6   9  11    6.34    1.13
   7  -9  11   22.10    1.73
  -7  -9 -11   23.91    1.84
   7   9  11   23.57    1.87
  -8  -9 -11    1.79    1.05
   8   9  11    2.44    0.96
  -9  -9 -11    9.82    1.71
   9   9  11   12.54    1.58
   9 -10 -11   16.30    1.86
   8 -10 -11    1.28    0.95
  -8  10  11    1.33    0.86
   7 -10 -11    2.21    0.91
  -7  10  11    1.88    0.87
   6 -10 -11   -0.06    0.75
  -6  10  11    0.57    0.67
   5 -10 -11   15.33    1.59
  -5  10  11   12.25    1.42
   4 -10 -11    2.45    0.87
  -4  10  11    3.95    0.97
   3 -10 -11    5.74    1.01
  -3  10  11    5.80    1.01
   2 -10 -11    4.78    0.96
  -2  10  11    3.62    0.86
   1 -10 -11    1.28    0.69
  -1  10  11    1.12    0.67
   0 -10 -11   -0.83    0.59
   0  10  11   -0.41    0.52
   1 -10  11   16.79    0.80
   1 -10  11   17.42    0.82
  -1 -10 -11   14.36    1.45
  -1  10 -11   16.98    0.71
   1  10  11   17.37    1.53
   2 -10  11    0.04    0.31
  -2 -10 -11    0.06    0.62
  -2  10 -11    0.19    0.25
   2  10  11   -0.39    0.60
  -3 -10 -11    0.04    0.64
   3  10  11    0.19    0.60
  -4 -10 -11    1.66    0.79
   4  10  11    0.65    0.63
  -5 -10 -11    0.35    0.73
   5  10  11    1.21    0.73
  -6 -10 -11   -0.81    0.66
   6  10  11    0.13    0.66
  -7 -10 -11    1.04    0.88
   7  10  11    1.00    0.79
  -8 -10 -11    1.00    0.93
   8  10  11    2.05    0.91
   8 -11 -11    0.52    0.89
  -8  11  11    1.58    0.94
   7 -11 -11    3.25    1.05
  -7  11  11    4.06    1.05
   6 -11 -11    2.74    1.01
  -6  11  11    3.82    1.01
   5 -11 -11    7.93    1.23
  -5  11  11    8.09    1.24
   4 -11 -11    1.44    0.85
  -4  11  11    2.41    0.83
   3 -11 -11    0.97    0.74
  -3  11  11    1.73    0.73
   2 -11 -11   14.24    1.48
  -2  11  11   14.46    1.54
   1 -11 -11   14.89    1.55
  -1  11  11   16.32    1.62
   0 -11 -11   23.96    1.77
   0  11  11   22.91    1.72
  -1 -11 -11   88.37    3.52
   1  11  11   84.01    3.48
  -2 -11 -11   13.91    1.47
   2  11  11   15.89    1.57
  -3 -11 -11   46.45    2.45
   3  11  11   46.48    2.49
  -4 -11 -11   24.88    1.83
   4  11  11   26.22    1.90
  -5 -11 -11   22.12    1.78
   5  11  11   20.91    1.78
  -6 -11 -11   13.24    1.48
   6  11  11   12.06    1.49
  -7 -11 -11   14.47    1.68
   7  11  11   13.69    1.62
  -8 -11 -11    5.31    1.29
   8  11  11    4.18    1.14
   7 -12 -11    0.74    0.90
  -7  12  11    1.01    0.81
   6 -12 -11   17.83    1.88
  -6  12  11   17.81    1.86
   5 -12 -11   -0.34    0.80
  -5  12  11    0.23    0.67
   4 -12 -11   23.88    1.93
  -4  12  11   25.71    1.91
   3 -12 -11    3.17    0.93
  -3  12  11    2.23    0.84
   2 -12 -11   20.34    1.74
  -2  12  11   18.27    1.75
   1 -12 -11   -0.38    0.64
  -1  12  11    0.16    0.61
   0 -12 -11    2.83    0.88
   0  12  11    2.67    0.89
  -1 -12 -11    1.25    0.79
   1  12  11   -0.64    0.57
  -2 -12 -11    6.30    1.10
   2  12  11    7.36    1.15
  -3 -12 -11    0.88    0.83
   3  12  11    0.31    0.72
  -4 -12 -11   -0.28    0.71
   4  12  11    0.64    0.72
  -5 -12 -11   -0.13    0.81
   5  12  11    0.02    0.74
  -6 -12 -11    1.38    0.86
   6  12  11    0.03    0.71
   7  12  11   -0.82    0.75
   6 -13 -11    1.49    1.03
  -6  13  11    3.31    0.98
   5 -13 -11    3.85    1.16
  -5  13  11    2.78    0.97
   4 -13 -11    4.06    1.08
  -4  13  11    3.38    1.00
   3 -13 -11    3.26    1.03
  -3  13  11    1.83    0.84
   2 -13 -11   13.61    1.57
  -2  13  11   14.94    1.67
   1 -13 -11    1.51    0.86
  -1  13  11    2.30    0.89
   0 -13 -11   14.01    1.52
   0  13  11   17.56    1.75
  -1 -13 -11    2.03    0.88
   1  13  11    1.34    0.81
  -2 -13 -11   24.18    1.94
   2  13  11   24.69    1.95
  -3 -13 -11    6.43    1.33
   3  13  11   12.43    1.53
  -4 -13 -11   28.59    2.09
   4  13  11   24.51    1.98
  -5 -13 -11    9.48    1.38
   5  13  11   10.28    1.44
   4 -14 -11    9.30    1.50
  -4  14  11    7.58    1.35
   3 -14 -11   13.59    1.65
  -3  14  11   12.02    1.53
   2 -14 -11    0.48    0.82
  -2  14  11    1.18    0.80
   1 -14 -11    5.96    1.18
  -1  14  11    7.54    1.24
   0 -14 -11   -0.28    0.76
   0  14  11    1.09    0.81
  -1 -14 -11    8.18    1.28
   1  14  11    4.05    1.03
  -2 -14 -11    0.73    0.86
   2  14  11   -0.10    0.66
  -3 -14 -11    5.57    1.17
   3  14  11    5.52    1.18
  12   0 -12    4.09    0.99
  11   0 -12    0.44    0.65
  10   0 -12    8.33    1.12
   9   0 -12   -0.11    0.55
   8   0 -12   56.28    2.33
   8   0 -12   55.69    2.36
   7   0 -12    0.21    0.35
   7   0 -12   -0.26    0.41
   6   0 -12   35.94    1.67
  -6   0  12   37.53    1.67
   5   0 -12    0.99    0.38
   5   0 -12    0.21    0.38
  -5   0  12    1.17    0.44
  -4   0  12  104.56    3.31
  -4   0  12  103.94    3.28
   4   0 -12  102.57    3.30
   4   0 -12  105.57    3.31
  -3   0  12    0.12    0.28
   3   0 -12    0.32    0.31
  -3   0  12   -0.16    0.28
   3   0 -12    0.27    0.33
  -2   0  12   24.99    1.23
  -2   0  12   28.40    1.26
   2   0 -12   28.33    1.25
   2   0 -12   26.28    1.25
   1   0 -12    0.09    0.32
  -1   0  12    0.12    0.29
   1   0 -12   -0.18    0.27
   0   0 -12    0.01    0.26
   0   0  12    0.28    0.32
   0   0 -12    0.44    0.38
   1   0  12    0.43    0.33
  -1   0 -12    0.49    0.33
  -1   0 -12   -0.34    0.33
   3   0  12    0.06    0.35
  -3   0 -12   -0.03    0.33
   4   0  12  187.55    5.74
  -4   0 -12  193.91    5.75
   5   0  12   -0.27    0.42
[truncated: 191,867 more chars]
