# Supplementary material for: Synthesis, Crystal Structure, and Luminescence of Cadmium(II) and Silver(I) Coordination Polymers Based on 1,3-Bis(1,2,4-triazol-1-yl)adamantane
Source: Molecules. 2021 Sep 5;26(17):5400. doi: 10.3390/molecules26175400 (PMC8434004; doi:10.3390/molecules26175400)
Supplement: Supplementary file 1 [file molecules-26-05400-s001.zip › Compound3.cif]

data_pot_cd008_1
_audit_creation_date               2021-07-26
_audit_creation_method
;
Olex2 1.2
(compiled 2018.05.29 svn.r3508 for OlexSys, GUI svn.r5506)
;
_shelx_SHELXL_version_number       '2017/1'
_audit_contact_author_address      ?
_audit_contact_author_email        ?
_audit_contact_author_name         ''
_audit_contact_author_phone        ?
_publ_contact_author_id_orcid      ?
_publ_section_references
;
Dolomanov, O.V., Bourhis, L.J., Gildea, R.J, Howard, J.A.K. & Puschmann, H.
 (2009), J. Appl. Cryst. 42, 339-341.

Sheldrick, G.M. (2015). Acta Cryst. A71, 3-8.

Sheldrick, G.M. (2015). Acta Cryst. C71, 3-8.
;
_chemical_name_common              ?
_chemical_name_systematic          ?
_chemical_formula_moiety           'C15 H22 Cd N8 O7, 0.5(C H4 O)'
_chemical_formula_sum              'C15.50 H24 Cd N8 O7.50'
_chemical_formula_weight           554.83
_chemical_melting_point            ?
loop_
  _atom_type_symbol
  _atom_type_description
  _atom_type_scat_dispersion_real
  _atom_type_scat_dispersion_imag
  _atom_type_scat_source
 'C' 'C' 0.0033 0.0016 'International Tables Vol C Tables 4.2.6.8 and 6.1.1.4'
 'H' 'H' 0.0000 0.0000 'International Tables Vol C Tables 4.2.6.8 and 6.1.1.4'
 'Cd' 'Cd' -0.8075 1.2024
 'International Tables Vol C Tables 4.2.6.8 and 6.1.1.4'
 'N' 'N' 0.0061 0.0033 'International Tables Vol C Tables 4.2.6.8 and 6.1.1.4'
 'O' 'O' 0.0106 0.0060 'International Tables Vol C Tables 4.2.6.8 and 6.1.1.4'

_shelx_space_group_comment
;
The symmetry employed for this shelxl refinement is uniquely defined
by the following loop, which should always be used as a source of
symmetry information in preference to the above space-group names.
They are only intended as comments.
;
_space_group_crystal_system        'monoclinic'
_space_group_IT_number             14
_space_group_name_H-M_alt          'P 1 21/c 1'
_space_group_name_Hall             '-P 2ybc'
loop_
  _space_group_symop_operation_xyz
 'x, y, z'
 '-x, y+1/2, -z+1/2'
 '-x, -y, -z'
 'x, -y-1/2, z-1/2'

_cell_length_a                     14.4331(6)
_cell_length_b                     12.1592(6)
_cell_length_c                     25.3803(12)
_cell_angle_alpha                  90
_cell_angle_beta                   104.848(2)
_cell_angle_gamma                  90
_cell_volume                       4305.4(3)
_cell_formula_units_Z              8
_cell_measurement_reflns_used      9879
_cell_measurement_temperature      298(2)
_cell_measurement_theta_max        25.78
_cell_measurement_theta_min        2.36
_shelx_estimated_absorpt_T_max     0.929
_shelx_estimated_absorpt_T_min     0.775
_exptl_absorpt_coefficient_mu      1.073
_exptl_absorpt_correction_T_max    0.7453
_exptl_absorpt_correction_T_min    0.6481
_exptl_absorpt_correction_type     multi-scan
_exptl_absorpt_process_details    
 'SADABS-2012/1 (Bruker,2012) was used for absorption correction. wR2(int) was 0.0680 before and 0.0522 after correction. The Ratio of minimum to maximum transmission is 0.8696. The \l/2 correction factor is 0.0015.'
_exptl_absorpt_special_details     ?
_exptl_crystal_colour              colourless
_exptl_crystal_colour_primary      colourless
_exptl_crystal_density_diffrn      1.712
_exptl_crystal_density_meas        .
_exptl_crystal_density_method      ?
_exptl_crystal_description         plate
_exptl_crystal_F_000               2248
_exptl_crystal_size_max            0.25
_exptl_crystal_size_mid            0.18
_exptl_crystal_size_min            0.07
_exptl_transmission_factor_max     ?
_exptl_transmission_factor_min     ?
_diffrn_reflns_av_R_equivalents    0.0458
_diffrn_reflns_av_unetI/netI       0.0310
_diffrn_reflns_Laue_measured_fraction_full  0.999
_diffrn_reflns_Laue_measured_fraction_max  0.999
_diffrn_reflns_limit_h_max         17
_diffrn_reflns_limit_h_min         -16
_diffrn_reflns_limit_k_max         14
_diffrn_reflns_limit_k_min         -14
_diffrn_reflns_limit_l_max         30
_diffrn_reflns_limit_l_min         -29
_diffrn_reflns_number              53132
_diffrn_reflns_point_group_measured_fraction_full  0.999
_diffrn_reflns_point_group_measured_fraction_max  0.999
_diffrn_reflns_theta_full          25.026
_diffrn_reflns_theta_max           25.026
_diffrn_reflns_theta_min           1.460
_diffrn_ambient_temperature        298(2)
_diffrn_detector                   CCD
_diffrn_detector_area_resol_mean   8.33
_diffrn_detector_type              'Bruker APEXII CCD area detector'
_diffrn_measured_fraction_theta_full  0.999
_diffrn_measured_fraction_theta_max  0.999
_diffrn_measurement_device         '\k-geometry diffractometer'
_diffrn_measurement_device_type    'Bruker APEX diffractometer'
_diffrn_measurement_method         '\w and \f scans'
_diffrn_radiation_monochromator    'graphite'
_diffrn_radiation_type             MoK\a
_diffrn_radiation_wavelength       0.71073
_diffrn_source                     'sealed tube'
_diffrn_special_details            ?
_diffrn_standards_interval_count   .
_diffrn_standards_interval_time    .
_diffrn_standards_number           .
_reflns_Friedel_coverage           0.000
_reflns_Friedel_fraction_full      .
_reflns_Friedel_fraction_max       .
_reflns_number_gt                  5278
_reflns_number_total               7600
_reflns_special_details
;
 Reflections were merged by SHELXL according to the crystal
 class for the calculation of statistics and refinement.
 
 _reflns_Friedel_fraction is defined as the number of unique
 Friedel pairs measured divided by the number that would be
 possible theoretically, ignoring centric projections and
 systematic absences.
;
_reflns_threshold_expression       'I > 2\s(I)'
_computing_cell_refinement         'Bruker SAINT'
_computing_data_collection         'Bruker APEX2'
_computing_data_reduction          'Bruker SAINT'
_computing_molecular_graphics      'Olex2 (Dolomanov et al., 2009)'
_computing_publication_material    'Olex2 (Dolomanov et al., 2009)'
_computing_structure_refinement    'ShelXL (Sheldrick, 2015)'
_computing_structure_solution      'ShelXT (Sheldrick, 2015)'
_refine_diff_density_max           1.368
_refine_diff_density_min           -1.045
_refine_diff_density_rms           0.115
_refine_ls_extinction_coef         .
_refine_ls_extinction_method       none
_refine_ls_goodness_of_fit_ref     1.168
_refine_ls_hydrogen_treatment      mixed
_refine_ls_matrix_type             full
_refine_ls_number_parameters       587
_refine_ls_number_reflns           7600
_refine_ls_number_restraints       33
_refine_ls_R_factor_all            0.0980
_refine_ls_R_factor_gt             0.0724
_refine_ls_restrained_S_all        1.176
_refine_ls_shift/su_max            0.005
_refine_ls_shift/su_mean           0.000
_refine_ls_structure_factor_coef   Fsqd
_refine_ls_weighting_details      
 'w=1/[\s^2^(Fo^2^)+(0.0193P)^2^+47.3428P] where P=(Fo^2^+2Fc^2^)/3'
_refine_ls_weighting_scheme        calc
_refine_ls_wR_factor_gt            0.1530
_refine_ls_wR_factor_ref           0.1631
_refine_special_details            ?
_olex2_refinement_description
;
1. Fixed Uiso
 At 1.2 times of:
  All C(H) groups, All C(H,H) groups
 At 1.5 times of:
  All C(H,H,H) groups, All O(H) groups
2. Restrained distances
 O7-H7
 0.85 with sigma of 0.01
 O8-H8
 0.85 with sigma of 0.01
 C7-H7
 1.901483 with sigma of 0.02
 Cd1-H7
 2.90692 with sigma of 0.02
 C8-H8
 1.854477 with sigma of 0.02
 Cd2-H8
 2.820711 with sigma of 0.02
3. Uiso/Uaniso restraints and constraints
Uanis(O8) \\sim Ueq: with sigma of 0.01 and sigma for terminal atoms of 0.02
4. Rigid body (RIGU) restrains
 O8, C8
 with sigma for 1-2 distances of 0.004 and sigma for 1-3 distances of 0.004
 O51, N5, O52, O53
 with sigma for 1-2 distances of 0.001 and sigma for 1-3 distances of 0.001
5.a Ternary CH refined with riding coordinates:
 C120(H120), C121(H121), C220(H220), C221(H221)
5.b Secondary CH2 refined with riding coordinates:
 C114(H11A,H11B), C115(H11C,H11D), C116(H11E,H11F), C118(H11G,H11H), C119(H11I,
 H11J), C122(H12A,H12B), C214(H21A,H21B), C215(H21C,H21D), C216(H21E,H21F),
 C218(H21G,H21H), C219(H21I,H21J), C222(H22A,H22B)
5.c Aromatic/amide H refined with riding coordinates:
 C111(H111), C112(H112), C123(H123), C124(H124), C211(H211), C212(H212),
 C223(H223), C224(H224)
5.d Idealised Me refined as rotating group:
 C7(H7A,H7B,H7C), C8(H8A,H8B,H8C), C1S(H1SA,H1SB,H1SC)
5.e Idealised tetrahedral OH refined as rotating group:
 O1S(H1S)
;
_atom_sites_solution_hydrogens     mixed
_atom_sites_solution_primary       dual
_atom_sites_solution_secondary     ?
loop_
  _atom_site_label
  _atom_site_type_symbol
  _atom_site_fract_x
  _atom_site_fract_y
  _atom_site_fract_z
  _atom_site_U_iso_or_equiv
  _atom_site_adp_type
  _atom_site_occupancy
  _atom_site_site_symmetry_order
  _atom_site_calc_flag
  _atom_site_refinement_flags_posn
  _atom_site_refinement_flags_adp
  _atom_site_refinement_flags_occupancy
  _atom_site_disorder_assembly
  _atom_site_disorder_group
 Cd1 Cd 0.62478(4) 0.75098(6) 0.65547(3) 0.03841(18) Uani 1 1 d D . . . .
 O7 O 0.5839(5) 0.8770(6) 0.7144(3) 0.0606(19) Uani 1 1 d D . . . .
 H7 H 0.537(5) 0.868(3) 0.729(3) 0.091 Uiso 1 1 d DR . . . .
 O31 O 0.7408(5) 0.6727(6) 0.7304(3) 0.063(2) Uani 1 1 d . . . . .
 O32 O 0.7964(5) 0.8171(6) 0.7053(3) 0.068(2) Uani 1 1 d . . . . .
 O33 O 0.8817(6) 0.7262(7) 0.7732(3) 0.077(2) Uani 1 1 d . . . . .
 O41 O 0.4822(6) 0.6748(6) 0.6773(4) 0.069(2) Uani 1 1 d . . . . .
 O42 O 0.4537(5) 0.7619(7) 0.6019(3) 0.068(2) Uani 1 1 d . . . . .
 O43 O 0.3369(6) 0.6939(10) 0.6274(5) 0.122(4) Uani 1 1 d . . . . .
 N3 N 0.8077(6) 0.7376(7) 0.7374(3) 0.0470(19) Uani 1 1 d . . . . .
 N4 N 0.4239(7) 0.7076(8) 0.6349(4) 0.061(2) Uani 1 1 d . . . . .
 N11 N 0.6314(5) 0.5905(6) 0.6120(3) 0.0385(17) Uani 1 1 d . . . . .
 N12 N 0.6871(5) 0.4423(6) 0.5814(3) 0.0357(17) Uani 1 1 d . . . . .
 N13 N 0.5990(6) 0.4614(6) 0.5472(4) 0.051(2) Uani 1 1 d . . . . .
 N14 N 0.6442(5) -0.1103(6) 0.6002(3) 0.0386(17) Uani 1 1 d . . . . .
 N15 N 0.6946(5) 0.0416(5) 0.5732(3) 0.0329(16) Uani 1 1 d . . . . .
 N16 N 0.6028(6) 0.0284(7) 0.5423(3) 0.053(2) Uani 1 1 d . . . . .
 C7 C 0.6070(9) 0.9904(9) 0.7155(5) 0.075(3) Uani 1 1 d D . . . .
 H7A H 0.576331 1.022986 0.680942 0.112 Uiso 1 1 calc GR . . . .
 H7B H 0.675183 0.998850 0.722347 0.112 Uiso 1 1 calc GR . . . .
 H7C H 0.585134 1.026118 0.743784 0.112 Uiso 1 1 calc GR . . . .
 C111 C 0.5701(7) 0.5512(8) 0.5671(4) 0.047(2) Uani 1 1 d . . . . .
 H111 H 0.511778 0.584820 0.551166 0.056 Uiso 1 1 calc R . . . .
 C112 C 0.7038(6) 0.5203(7) 0.6193(4) 0.040(2) Uani 1 1 d . . . . .
 H112 H 0.759366 0.524990 0.647538 0.048 Uiso 1 1 calc R . . . .
 C113 C 0.7456(6) 0.3472(7) 0.5728(4) 0.037(2) Uani 1 1 d . . . . .
 C114 C 0.6896(5) 0.2422(7) 0.5770(3) 0.0321(17) Uani 1 1 d . . . . .
 H11A H 0.628236 0.243471 0.550141 0.039 Uiso 1 1 calc R . . . .
 H11B H 0.678008 0.237056 0.612924 0.039 Uiso 1 1 calc R . . . .
 C115 C 0.8415(6) 0.3454(7) 0.6145(4) 0.042(2) Uani 1 1 d . . . . .
 H11C H 0.875004 0.414022 0.613005 0.051 Uiso 1 1 calc R . . . .
 H11D H 0.831786 0.337943 0.650739 0.051 Uiso 1 1 calc R . . . .
 C116 C 0.7594(7) 0.3546(7) 0.5145(4) 0.042(2) Uani 1 1 d . . . . .
 H11E H 0.697563 0.355755 0.488026 0.051 Uiso 1 1 calc R . . . .
 H11F H 0.793349 0.421667 0.510456 0.051 Uiso 1 1 calc R . . . .
 C117 C 0.7487(6) 0.1433(6) 0.5670(3) 0.0319(19) Uani 1 1 d . . . . .
 C118 C 0.8467(6) 0.1392(7) 0.6088(4) 0.038(2) Uani 1 1 d . . . . .
 H11G H 0.883791 0.077242 0.601451 0.046 Uiso 1 1 calc R . . . .
 H11H H 0.838506 0.131464 0.645414 0.046 Uiso 1 1 calc R . . . .
 C119 C 0.7628(6) 0.1481(7) 0.5096(4) 0.036(2) Uani 1 1 d . . . . .
 H11I H 0.701204 0.148009 0.482969 0.043 Uiso 1 1 calc R . . . .
 H11J H 0.798888 0.084480 0.503074 0.043 Uiso 1 1 calc R . . . .
 C120 C 0.9003(6) 0.2519(8) 0.6034(4) 0.046(2) Uani 1 1 d . . . . .
 H120 H 0.962982 0.252811 0.629958 0.056 Uiso 1 1 calc R . . . .
 C121 C 0.8176(6) 0.2536(8) 0.5046(4) 0.044(2) Uani 1 1 d . . . . .
 H121 H 0.827794 0.257997 0.467908 0.053 Uiso 1 1 calc R . . . .
 C122 C 0.9141(6) 0.2569(8) 0.5467(4) 0.055(3) Uani 1 1 d . . . . .
 H12A H 0.952907 0.195074 0.540989 0.066 Uiso 1 1 calc R . . . .
 H12B H 0.947603 0.324022 0.542330 0.066 Uiso 1 1 calc R . . . .
 C123 C 0.5758(7) -0.0641(7) 0.5599(4) 0.045(2) Uani 1 1 d . . . . .
 H123 H 0.515503 -0.094930 0.546037 0.054 Uiso 1 1 calc R . . . .
 C124 C 0.7175(6) -0.0405(7) 0.6067(4) 0.037(2) Uani 1 1 d . . . . .
 H124 H 0.776641 -0.049365 0.631677 0.045 Uiso 1 1 calc R . . . .
 Cd2 Cd 0.07551(5) 0.75300(6) 0.65676(3) 0.0451(2) Uani 1 1 d D . . . .
 O8 O 0.0140(7) 0.8572(8) 0.7164(5) 0.110(3) Uani 1 1 d D U . . .
 H8 H -0.039(5) 0.835(5) 0.722(4) 0.165 Uiso 1 1 d DR . . . .
 O51 O 0.1526(8) 0.6546(9) 0.7441(4) 0.104(3) Uani 1 1 d . U . . .
 O52 O 0.2262(6) 0.7805(7) 0.7161(3) 0.083(2) Uani 1 1 d . U . . .
 O53 O 0.2925(8) 0.7046(8) 0.7918(4) 0.103(3) Uani 1 1 d . U . . .
 O61 O -0.0786(5) 0.6630(6) 0.6473(3) 0.0620(19) Uani 1 1 d . . . . .
 O62 O -0.0701(5) 0.7791(7) 0.5867(4) 0.084(3) Uani 1 1 d . . . . .
 O63 O -0.2053(6) 0.7083(8) 0.5842(4) 0.085(3) Uani 1 1 d . . . . .
 N5 N 0.2240(8) 0.7110(8) 0.7515(4) 0.065(2) Uani 1 1 d . U . . .
 N6 N -0.1199(6) 0.7138(7) 0.6061(4) 0.055(2) Uani 1 1 d . . . . .
 N21 N 0.1140(5) 0.6001(6) 0.6156(3) 0.0431(19) Uani 1 1 d . . . . .
 N22 N 0.1840(5) 0.4507(6) 0.5962(3) 0.0374(17) Uani 1 1 d . . . . .
 N23 N 0.1041(6) 0.4655(6) 0.5546(3) 0.0453(19) Uani 1 1 d . . . . .
 N24 N 0.1192(5) -0.0986(6) 0.6129(3) 0.0434(19) Uani 1 1 d . . . . .
 N25 N 0.1862(5) 0.0502(6) 0.5941(3) 0.0354(17) Uani 1 1 d . . . . .
 N26 N 0.1019(5) 0.0407(6) 0.5542(3) 0.0437(19) Uani 1 1 d . . . . .
 C8 C 0.0276(10) 0.9648(11) 0.7339(6) 0.097(5) Uani 1 1 d D U . . .
 H8A H 0.003499 1.013427 0.703708 0.145 Uiso 1 1 calc GR . . . .
 H8B H 0.094741 0.978167 0.748854 0.145 Uiso 1 1 calc GR . . . .
 H8C H -0.006083 0.977733 0.761431 0.145 Uiso 1 1 calc GR . . . .
 C211 C 0.0662(7) 0.5553(7) 0.5678(4) 0.042(2) Uani 1 1 d . . . . .
 H211 H 0.010464 0.586103 0.546009 0.051 Uiso 1 1 calc R . . . .
 C212 C 0.1873(7) 0.5309(8) 0.6319(4) 0.043(2) Uani 1 1 d . . . . .
 H212 H 0.234782 0.538099 0.664299 0.052 Uiso 1 1 calc R . . . .
 C213 C 0.2480(6) 0.3530(7) 0.5975(4) 0.037(2) Uani 1 1 d . . . . .
 C214 C 0.1859(6) 0.2494(7) 0.5953(3) 0.0372(18) Uani 1 1 d . . . . .
 H21A H 0.159179 0.247601 0.626648 0.045 Uiso 1 1 calc R . . . .
 H21B H 0.133264 0.250707 0.562605 0.045 Uiso 1 1 calc R . . . .
 C215 C 0.3283(6) 0.3525(8) 0.6497(4) 0.047(2) Uani 1 1 d . . . . .
 H21C H 0.301760 0.349501 0.681099 0.056 Uiso 1 1 calc R . . . .
 H21D H 0.366283 0.419020 0.652065 0.056 Uiso 1 1 calc R . . . .
 C216 C 0.2878(8) 0.3567(8) 0.5472(4) 0.055(3) Uani 1 1 d . . . . .
 H21E H 0.235638 0.357459 0.514398 0.066 Uiso 1 1 calc R . . . .
 H21F H 0.325578 0.422959 0.547822 0.066 Uiso 1 1 calc R . . . .
 C217 C 0.2476(6) 0.1474(6) 0.5950(4) 0.034(2) Uani 1 1 d . . . . .
 C218 C 0.3304(6) 0.1462(7) 0.6470(4) 0.045(2) Uani 1 1 d . . . . .
 H21G H 0.370113 0.081804 0.647115 0.054 Uiso 1 1 calc R . . . .
 H21H H 0.305070 0.143095 0.678846 0.054 Uiso 1 1 calc R . . . .
 C219 C 0.2878(7) 0.1497(7) 0.5448(4) 0.043(2) Uani 1 1 d . . . . .
 H21I H 0.235812 0.149471 0.511872 0.051 Uiso 1 1 calc R . . . .
 H21J H 0.327437 0.085482 0.544456 0.051 Uiso 1 1 calc R . . . .
 C220 C 0.3909(6) 0.2516(8) 0.6486(4) 0.052(2) Uani 1 1 d . . . . .
 H220 H 0.443950 0.250916 0.681652 0.062 Uiso 1 1 calc R . . . .
 C221 C 0.3491(7) 0.2574(8) 0.5477(4) 0.052(2) Uani 1 1 d . . . . .
 H221 H 0.375915 0.260000 0.515967 0.063 Uiso 1 1 calc R . . . .
 C222 C 0.4309(7) 0.2558(9) 0.5993(5) 0.063(3) Uani 1 1 d . . . . .
 H22A H 0.471137 0.192039 0.598937 0.076 Uiso 1 1 calc R . . . .
 H22B H 0.469929 0.321216 0.600732 0.076 Uiso 1 1 calc R . . . .
 C223 C 0.0646(6) -0.0505(7) 0.5673(4) 0.037(2) Uani 1 1 d . . . . .
 H223 H 0.006524 -0.079330 0.547275 0.044 Uiso 1 1 calc R . . . .
 C224 C 0.1953(7) -0.0335(7) 0.6279(4) 0.043(2) Uani 1 1 d . . . . .
 H224 H 0.247253 -0.045378 0.657710 0.052 Uiso 1 1 calc R . . . .
 O1S O 0.4074(6) 0.8817(8) 0.7296(4) 0.086(3) Uani 1 1 d . . . . .
 H1S H 0.365225 0.834712 0.723251 0.128 Uiso 1 1 calc GR . . . .
 C1S C 0.3999(10) 0.9447(11) 0.7747(5) 0.091(5) Uani 1 1 d . . . . .
 H1SA H 0.338338 0.979836 0.766812 0.136 Uiso 1 1 calc GR . . . .
 H1SB H 0.449372 0.999584 0.782216 0.136 Uiso 1 1 calc GR . . . .
 H1SC H 0.406965 0.897713 0.805868 0.136 Uiso 1 1 calc GR . . . .

loop_
  _atom_site_aniso_label
  _atom_site_aniso_U_11
  _atom_site_aniso_U_22
  _atom_site_aniso_U_33
  _atom_site_aniso_U_23
  _atom_site_aniso_U_13
  _atom_site_aniso_U_12
 Cd1 0.0420(3) 0.0286(3) 0.0466(4) 0.0043(3) 0.0148(3) -0.0063(3)
 O7 0.064(5) 0.048(4) 0.073(5) -0.016(4) 0.024(4) 0.000(4)
 O31 0.053(4) 0.064(5) 0.074(5) 0.001(4) 0.020(4) -0.015(4)
 O32 0.059(5) 0.063(5) 0.086(6) 0.029(4) 0.026(4) 0.010(4)
 O33 0.069(5) 0.084(6) 0.062(5) 0.004(4) -0.009(4) 0.011(4)
 O41 0.079(6) 0.059(5) 0.082(6) 0.017(4) 0.046(5) 0.005(4)
 O42 0.050(4) 0.074(5) 0.084(5) 0.004(5) 0.025(4) -0.018(4)
 O43 0.058(6) 0.162(11) 0.155(10) -0.008(8) 0.043(6) -0.050(6)
 N3 0.047(4) 0.050(5) 0.044(4) -0.011(4) 0.010(4) 0.010(4)
 N4 0.051(6) 0.058(6) 0.082(7) -0.008(5) 0.035(5) -0.017(4)
 N11 0.034(4) 0.036(4) 0.048(5) -0.001(3) 0.015(4) -0.004(3)
 N12 0.029(4) 0.031(4) 0.045(4) 0.003(3) 0.005(3) -0.005(3)
 N13 0.037(4) 0.039(5) 0.069(6) -0.003(4) -0.001(4) 0.003(4)
 N14 0.041(4) 0.031(4) 0.049(5) 0.009(3) 0.018(4) 0.000(3)
 N15 0.034(4) 0.029(4) 0.038(4) 0.008(3) 0.012(3) -0.004(3)
 N16 0.043(5) 0.054(5) 0.053(5) 0.021(4) -0.001(4) -0.021(4)
 C7 0.084(9) 0.055(7) 0.085(9) -0.016(6) 0.022(7) 0.004(6)
 C111 0.034(5) 0.046(6) 0.056(6) 0.000(5) 0.005(5) 0.003(4)
 C112 0.038(5) 0.038(5) 0.043(5) -0.003(4) 0.012(4) -0.008(4)
 C113 0.034(5) 0.035(5) 0.043(5) 0.005(4) 0.010(4) -0.009(4)
 C114 0.029(4) 0.031(4) 0.038(4) 0.003(4) 0.011(3) -0.004(4)
 C115 0.035(5) 0.031(5) 0.060(6) 0.005(4) 0.012(4) -0.010(4)
 C116 0.043(5) 0.041(5) 0.049(6) 0.014(4) 0.023(4) -0.002(4)
 C117 0.035(5) 0.019(4) 0.042(5) 0.002(3) 0.011(4) -0.012(3)
 C118 0.029(4) 0.029(4) 0.054(6) 0.005(4) 0.008(4) -0.001(4)
 C119 0.042(5) 0.027(4) 0.047(5) 0.006(4) 0.025(4) 0.000(4)
 C120 0.025(4) 0.041(5) 0.070(6) -0.006(5) 0.007(4) -0.004(4)
 C121 0.043(5) 0.045(5) 0.052(5) 0.029(5) 0.025(4) 0.002(5)
 C122 0.044(5) 0.034(5) 0.096(8) 0.014(6) 0.034(5) -0.005(5)
 C123 0.044(6) 0.040(5) 0.049(6) 0.012(4) 0.006(5) -0.021(4)
 C124 0.027(4) 0.037(5) 0.049(5) 0.005(4) 0.011(4) -0.004(4)
 Cd2 0.0502(4) 0.0309(3) 0.0588(4) 0.0037(3) 0.0221(3) -0.0081(3)
 O8 0.110(6) 0.091(6) 0.159(7) -0.046(5) 0.089(6) -0.032(5)
 O51 0.133(6) 0.107(7) 0.070(5) 0.008(5) 0.021(4) -0.033(5)
 O52 0.076(5) 0.097(6) 0.072(4) 0.028(4) 0.012(4) 0.000(4)
 O53 0.138(6) 0.083(6) 0.068(4) 0.002(4) -0.011(4) 0.012(5)
 O61 0.058(5) 0.058(5) 0.072(5) 0.003(4) 0.020(4) -0.008(4)
 O62 0.051(4) 0.074(6) 0.128(7) 0.044(5) 0.025(5) -0.011(4)
 O63 0.045(5) 0.108(7) 0.100(7) 0.015(5) 0.013(4) -0.017(4)
 N5 0.102(5) 0.055(5) 0.041(4) -0.006(3) 0.020(3) 0.007(3)
 N6 0.042(5) 0.058(6) 0.072(6) -0.001(5) 0.025(5) -0.011(4)
 N21 0.038(4) 0.041(4) 0.051(5) -0.006(4) 0.013(4) -0.010(4)
 N22 0.034(4) 0.033(4) 0.043(4) 0.010(3) 0.006(3) -0.011(3)
 N23 0.047(5) 0.035(4) 0.048(5) 0.008(4) 0.003(4) -0.006(4)
 N24 0.042(4) 0.028(4) 0.059(5) 0.005(4) 0.011(4) -0.017(3)
 N25 0.030(4) 0.030(4) 0.045(4) 0.009(3) 0.008(3) -0.010(3)
 N26 0.036(4) 0.044(5) 0.049(5) 0.013(4) 0.007(4) -0.009(4)
 C8 0.107(11) 0.074(8) 0.105(11) -0.033(8) 0.016(9) 0.010(8)
 C211 0.038(5) 0.037(5) 0.051(6) 0.002(4) 0.009(5) -0.003(4)
 C212 0.042(5) 0.045(6) 0.044(5) -0.007(4) 0.012(4) -0.008(4)
 C213 0.039(5) 0.035(5) 0.040(5) 0.004(4) 0.015(4) -0.011(4)
 C214 0.038(4) 0.037(4) 0.037(4) 0.006(4) 0.010(3) -0.019(4)
 C215 0.038(5) 0.039(5) 0.056(6) 0.003(4) 0.000(5) -0.011(4)
 C216 0.062(7) 0.042(6) 0.068(7) 0.007(5) 0.030(6) -0.017(5)
 C217 0.034(5) 0.025(4) 0.046(5) 0.008(4) 0.012(4) -0.012(4)
 C218 0.034(5) 0.036(5) 0.065(7) 0.012(5) 0.012(5) -0.004(4)
 C219 0.051(6) 0.030(5) 0.055(6) -0.003(4) 0.028(5) -0.009(4)
 C220 0.032(4) 0.042(5) 0.076(7) -0.007(6) 0.004(4) -0.006(5)
 C221 0.060(6) 0.036(5) 0.077(7) 0.007(5) 0.048(5) -0.017(5)
 C222 0.042(5) 0.036(5) 0.118(9) -0.004(6) 0.031(6) -0.017(5)
 C223 0.029(5) 0.033(5) 0.051(6) -0.003(4) 0.014(4) -0.009(4)
 C224 0.038(5) 0.032(5) 0.057(6) 0.008(4) 0.005(4) -0.005(4)
 O1S 0.073(6) 0.085(7) 0.110(7) -0.038(5) 0.043(5) -0.012(5)
 C1S 0.083(9) 0.083(10) 0.094(10) -0.037(8) 0.002(8) 0.031(8)

_geom_special_details
;
 All esds (except the esd in the dihedral angle between two l.s. planes)
 are estimated using the full covariance matrix.  The cell esds are taken
 into account individually in the estimation of esds in distances, angles
 and torsion angles; correlations between esds in cell parameters are only
 used when they are defined by crystal symmetry.  An approximate (isotropic)
 treatment of cell esds is used for estimating esds involving l.s. planes.
;
loop_
  _geom_bond_atom_site_label_1
  _geom_bond_atom_site_label_2
  _geom_bond_distance
  _geom_bond_site_symmetry_2
  _geom_bond_publ_flag
 Cd1 O7 2.321(7) . ?
 Cd1 O31 2.386(8) . ?
 Cd1 O32 2.603(8) . ?
 Cd1 O41 2.447(8) . ?
 Cd1 O42 2.498(7) . ?
 Cd1 N11 2.256(7) . ?
 Cd1 N14 2.256(7) 1_565 ?
 O7 H7 0.859(10) . ?
 O7 C7 1.418(13) . ?
 O31 N3 1.225(10) . ?
 O32 N3 1.247(10) . ?
 O33 N3 1.221(10) . ?
 O41 N4 1.249(11) . ?
 O42 N4 1.228(11) . ?
 O43 N4 1.232(11) . ?
 N11 C111 1.338(11) . ?
 N11 C112 1.326(11) . ?
 N12 N13 1.363(10) . ?
 N12 C112 1.329(11) . ?
 N12 C113 1.480(11) . ?
 N13 C111 1.314(12) . ?
 N14 C123 1.349(11) . ?
 N14 C124 1.334(10) . ?
 N15 N16 1.366(10) . ?
 N15 C117 1.492(9) . ?
 N15 C124 1.297(10) . ?
 N16 C123 1.306(11) . ?
 C7 H7A 0.9600 . ?
 C7 H7B 0.9600 . ?
 C7 H7C 0.9600 . ?
 C111 H111 0.9300 . ?
 C112 H112 0.9300 . ?
 C113 C114 1.529(11) . ?
 C113 C115 1.512(12) . ?
 C113 C116 1.546(12) . ?
 C114 H11A 0.9700 . ?
 C114 H11B 0.9700 . ?
 C114 C117 1.533(11) . ?
 C115 H11C 0.9700 . ?
 C115 H11D 0.9700 . ?
 C115 C120 1.487(12) . ?
 C116 H11E 0.9700 . ?
 C116 H11F 0.9700 . ?
 C116 C121 1.543(13) . ?
 C117 C118 1.537(11) . ?
 C117 C119 1.523(11) . ?
 C118 H11G 0.9700 . ?
 C118 H11H 0.9700 . ?
 C118 C120 1.596(12) . ?
 C119 H11I 0.9700 . ?
 C119 H11J 0.9700 . ?
 C119 C121 1.530(11) . ?
 C120 H120 0.9800 . ?
 C120 C122 1.504(13) . ?
 C121 H121 0.9800 . ?
 C121 C122 1.523(13) . ?
 C122 H12A 0.9700 . ?
 C122 H12B 0.9700 . ?
 C123 H123 0.9300 . ?
 C124 H124 0.9300 . ?
 Cd2 O8 2.318(9) . ?
 Cd2 O51 2.513(10) . ?
 Cd2 O52 2.330(8) . ?
 Cd2 O61 2.435(7) . ?
 Cd2 O62 2.401(8) . ?
 Cd2 N21 2.270(8) . ?
 Cd2 N24 2.292(7) 1_565 ?
 O8 H8 0.857(10) . ?
 O8 C8 1.380(14) . ?
 O51 N5 1.211(13) . ?
 O52 N5 1.241(11) . ?
 O53 N5 1.230(12) . ?
 O61 N6 1.229(11) . ?
 O62 N6 1.253(10) . ?
 O63 N6 1.217(11) . ?
 N21 C211 1.347(11) . ?
 N21 C212 1.331(12) . ?
 N22 N23 1.361(10) . ?
 N22 C212 1.324(11) . ?
 N22 C213 1.500(11) . ?
 N23 C211 1.304(12) . ?
 N24 C223 1.355(11) . ?
 N24 C224 1.327(11) . ?
 N25 N26 1.375(10) . ?
 N25 C217 1.475(9) . ?
 N25 C224 1.315(11) . ?
 N26 C223 1.313(11) . ?
 C8 H8A 0.9600 . ?
 C8 H8B 0.9600 . ?
 C8 H8C 0.9600 . ?
 C211 H211 0.9300 . ?
 C212 H212 0.9300 . ?
 C213 C214 1.539(11) . ?
 C213 C215 1.520(12) . ?
 C213 C216 1.527(13) . ?
 C214 H21A 0.9700 . ?
 C214 H21B 0.9700 . ?
 C214 C217 1.528(12) . ?
 C215 H21C 0.9700 . ?
 C215 H21D 0.9700 . ?
 C215 C220 1.527(13) . ?
 C216 H21E 0.9700 . ?
 C216 H21F 0.9700 . ?
 C216 C221 1.495(14) . ?
 C217 C218 1.535(12) . ?
 C217 C219 1.529(12) . ?
 C218 H21G 0.9700 . ?
 C218 H21H 0.9700 . ?
 C218 C220 1.545(12) . ?
 C219 H21I 0.9700 . ?
 C219 H21J 0.9700 . ?
 C219 C221 1.572(11) . ?
 C220 H220 0.9800 . ?
 C220 C222 1.509(14) . ?
 C221 H221 0.9800 . ?
 C221 C222 1.521(14) . ?
 C222 H22A 0.9700 . ?
 C222 H22B 0.9700 . ?
 C223 H223 0.9300 . ?
 C224 H224 0.9300 . ?
 O1S H1S 0.8200 . ?
 O1S C1S 1.403(13) . ?
 C1S H1SA 0.9600 . ?
 C1S H1SB 0.9600 . ?
 C1S H1SC 0.9600 . ?

loop_
  _geom_angle_atom_site_label_1
  _geom_angle_atom_site_label_2
  _geom_angle_atom_site_label_3
  _geom_angle
  _geom_angle_site_symmetry_1
  _geom_angle_site_symmetry_3
  _geom_angle_publ_flag
 O7 Cd1 O31 89.6(3) . . ?
 O7 Cd1 O32 81.4(3) . . ?
 O7 Cd1 O41 74.7(3) . . ?
 O7 Cd1 O42 86.4(3) . . ?
 O31 Cd1 O32 49.5(2) . . ?
 O31 Cd1 O41 97.3(3) . . ?
 O31 Cd1 O42 148.0(2) . . ?
 O41 Cd1 O32 139.3(3) . . ?
 O41 Cd1 O42 51.1(3) . . ?
 O42 Cd1 O32 158.9(3) . . ?
 N11 Cd1 O7 159.4(3) . . ?
 N11 Cd1 O31 86.3(3) . . ?
 N11 Cd1 O32 110.5(3) . . ?
 N11 Cd1 O41 85.8(3) . . ?
 N11 Cd1 O42 86.5(3) . . ?
 N11 Cd1 N14 108.3(3) . 1_565 ?
 N14 Cd1 O7 90.0(3) 1_565 . ?
 N14 Cd1 O31 128.3(3) 1_565 . ?
 N14 Cd1 O32 79.4(2) 1_565 . ?
 N14 Cd1 O41 132.0(3) 1_565 . ?
 N14 Cd1 O42 83.4(3) 1_565 . ?
 Cd1 O7 H7 123(2) . . ?
 C7 O7 Cd1 123.8(7) . . ?
 C7 O7 H7 109(2) . . ?
 N3 O31 Cd1 102.9(6) . . ?
 N3 O32 Cd1 91.5(5) . . ?
 N4 O41 Cd1 96.0(5) . . ?
 N4 O42 Cd1 94.1(6) . . ?
 O31 N3 O32 116.1(8) . . ?
 O33 N3 O31 122.7(9) . . ?
 O33 N3 O32 121.2(9) . . ?
 O42 N4 O41 118.9(9) . . ?
 O42 N4 O43 119.2(11) . . ?
 O43 N4 O41 121.7(10) . . ?
 C111 N11 Cd1 128.6(6) . . ?
 C112 N11 Cd1 128.2(6) . . ?
 C112 N11 C111 102.4(8) . . ?
 N13 N12 C113 121.0(7) . . ?
 C112 N12 N13 107.8(7) . . ?
 C112 N12 C113 131.3(7) . . ?
 C111 N13 N12 103.5(8) . . ?
 C123 N14 Cd1 126.9(6) . 1_545 ?
 C124 N14 Cd1 128.3(6) . 1_545 ?
 C124 N14 C123 103.4(7) . . ?
 N16 N15 C117 119.5(6) . . ?
 C124 N15 N16 109.4(7) . . ?
 C124 N15 C117 130.9(7) . . ?
 C123 N16 N15 103.6(7) . . ?
 O7 C7 H7A 109.5 . . ?
 O7 C7 H7B 109.5 . . ?
 O7 C7 H7C 109.5 . . ?
 H7A C7 H7B 109.5 . . ?
 H7A C7 H7C 109.5 . . ?
 H7B C7 H7C 109.5 . . ?
 N11 C111 H111 122.7 . . ?
 N13 C111 N11 114.7(8) . . ?
 N13 C111 H111 122.7 . . ?
 N11 C112 N12 111.6(8) . . ?
 N11 C112 H112 124.2 . . ?
 N12 C112 H112 124.2 . . ?
 N12 C113 C114 108.1(7) . . ?
 N12 C113 C115 111.3(7) . . ?
 N12 C113 C116 108.3(7) . . ?
 C114 C113 C116 108.4(7) . . ?
 C115 C113 C114 110.1(7) . . ?
 C115 C113 C116 110.6(7) . . ?
 C113 C114 H11A 110.0 . . ?
 C113 C114 H11B 110.0 . . ?
 C113 C114 C117 108.5(6) . . ?
 H11A C114 H11B 108.4 . . ?
 C117 C114 H11A 110.0 . . ?
 C117 C114 H11B 110.0 . . ?
 C113 C115 H11C 109.6 . . ?
 C113 C115 H11D 109.6 . . ?
 H11C C115 H11D 108.2 . . ?
 C120 C115 C113 110.1(8) . . ?
 C120 C115 H11C 109.6 . . ?
 C120 C115 H11D 109.6 . . ?
 C113 C116 H11E 110.0 . . ?
 C113 C116 H11F 110.0 . . ?
 H11E C116 H11F 108.4 . . ?
 C121 C116 C113 108.6(7) . . ?
 C121 C116 H11E 110.0 . . ?
 C121 C116 H11F 110.0 . . ?
 N15 C117 C114 107.8(6) . . ?
 N15 C117 C118 108.3(6) . . ?
 N15 C117 C119 109.6(6) . . ?
 C114 C117 C118 111.3(7) . . ?
 C119 C117 C114 110.2(7) . . ?
 C119 C117 C118 109.6(7) . . ?
 C117 C118 H11G 110.3 . . ?
 C117 C118 H11H 110.3 . . ?
 C117 C118 C120 107.1(7) . . ?
 H11G C118 H11H 108.6 . . ?
 C120 C118 H11G 110.3 . . ?
 C120 C118 H11H 110.3 . . ?
 C117 C119 H11I 110.1 . . ?
 C117 C119 H11J 110.1 . . ?
 C117 C119 C121 108.1(7) . . ?
 H11I C119 H11J 108.4 . . ?
 C121 C119 H11I 110.1 . . ?
 C121 C119 H11J 110.1 . . ?
 C115 C120 C118 109.1(7) . . ?
 C115 C120 H120 109.4 . . ?
 C115 C120 C122 111.8(8) . . ?
 C118 C120 H120 109.4 . . ?
 C122 C120 C118 107.6(8) . . ?
 C122 C120 H120 109.4 . . ?
 C116 C121 H121 109.4 . . ?
 C119 C121 C116 109.8(6) . . ?
 C119 C121 H121 109.4 . . ?
 C122 C121 C116 107.6(8) . . ?
 C122 C121 C119 111.2(7) . . ?
 C122 C121 H121 109.4 . . ?
 C120 C122 C121 110.4(7) . . ?
 C120 C122 H12A 109.6 . . ?
 C120 C122 H12B 109.6 . . ?
 C121 C122 H12A 109.6 . . ?
 C121 C122 H12B 109.6 . . ?
 H12A C122 H12B 108.1 . . ?
 N14 C123 H123 123.4 . . ?
 N16 C123 N14 113.2(8) . . ?
 N16 C123 H123 123.4 . . ?
 N14 C124 H124 124.8 . . ?
 N15 C124 N14 110.4(8) . . ?
 N15 C124 H124 124.8 . . ?
 O8 Cd2 O51 80.9(4) . . ?
 O8 Cd2 O52 87.2(4) . . ?
 O8 Cd2 O61 79.4(3) . . ?
 O8 Cd2 O62 90.1(4) . . ?
 O52 Cd2 O51 50.9(3) . . ?
 O52 Cd2 O61 143.7(3) . . ?
 O52 Cd2 O62 162.6(3) . . ?
 O61 Cd2 O51 93.4(3) . . ?
 O62 Cd2 O51 145.3(3) . . ?
 O62 Cd2 O61 51.9(3) . . ?
 N21 Cd2 O8 158.1(3) . . ?
 N21 Cd2 O51 84.8(3) . . ?
 N21 Cd2 O52 96.7(3) . . ?
 N21 Cd2 O61 84.9(3) . . ?
 N21 Cd2 O62 92.2(3) . . ?
 N21 Cd2 N24 106.9(3) . 1_565 ?
 N24 Cd2 O8 94.9(3) 1_565 . ?
 N24 Cd2 O51 133.5(3) 1_565 . ?
 N24 Cd2 O52 82.7(3) 1_565 . ?
 N24 Cd2 O61 131.6(3) 1_565 . ?
 N24 Cd2 O62 80.4(3) 1_565 . ?
 Cd2 O8 H8 116.4(19) . . ?
 C8 O8 Cd2 133.1(9) . . ?
 C8 O8 H8 108(2) . . ?
 N5 O51 Cd2 92.0(7) . . ?
 N5 O52 Cd2 100.2(7) . . ?
 N6 O61 Cd2 95.1(6) . . ?
 N6 O62 Cd2 96.1(6) . . ?
 O51 N5 O52 116.8(11) . . ?
 O51 N5 O53 124.4(11) . . ?
 O53 N5 O52 118.8(11) . . ?
 O61 N6 O62 116.8(9) . . ?
 O63 N6 O61 125.0(9) . . ?
 O63 N6 O62 118.1(10) . . ?
 C211 N21 Cd2 128.0(6) . . ?
 C212 N21 Cd2 130.1(6) . . ?
 C212 N21 C211 102.0(8) . . ?
 N23 N22 C213 121.0(7) . . ?
 C212 N22 N23 107.9(8) . . ?
 C212 N22 C213 131.0(8) . . ?
 C211 N23 N22 103.8(8) . . ?
 C223 N24 Cd2 125.6(5) . 1_545 ?
 C224 N24 Cd2 129.9(6) . 1_545 ?
 C224 N24 C223 104.2(7) . . ?
 N26 N25 C217 119.6(7) . . ?
 C224 N25 N26 109.8(7) . . ?
 C224 N25 C217 130.6(7) . . ?
 C223 N26 N25 103.1(7) . . ?
 O8 C8 H8A 109.5 . . ?
 O8 C8 H8B 109.5 . . ?
 O8 C8 H8C 109.5 . . ?
 H8A C8 H8B 109.5 . . ?
 H8A C8 H8C 109.5 . . ?
 H8B C8 H8C 109.5 . . ?
 N21 C211 H211 122.7 . . ?
 N23 C211 N21 114.7(9) . . ?
 N23 C211 H211 122.7 . . ?
 N21 C212 H212 124.2 . . ?
 N22 C212 N21 111.6(8) . . ?
 N22 C212 H212 124.2 . . ?
 N22 C213 C214 107.3(7) . . ?
 N22 C213 C215 110.4(7) . . ?
 N22 C213 C216 108.7(7) . . ?
 C215 C213 C214 109.6(7) . . ?
 C215 C213 C216 111.2(8) . . ?
 C216 C213 C214 109.5(7) . . ?
 C213 C214 H21A 109.8 . . ?
 C213 C214 H21B 109.8 . . ?
 H21A C214 H21B 108.3 . . ?
 C217 C214 C213 109.2(6) . . ?
 C217 C214 H21A 109.8 . . ?
 C217 C214 H21B 109.8 . . ?
 C213 C215 H21C 110.1 . . ?
 C213 C215 H21D 110.1 . . ?
 C213 C215 C220 108.0(8) . . ?
 H21C C215 H21D 108.4 . . ?
 C220 C215 H21C 110.1 . . ?
 C220 C215 H21D 110.1 . . ?
 C213 C216 H21E 110.0 . . ?
 C213 C216 H21F 110.0 . . ?
 H21E C216 H21F 108.4 . . ?
 C221 C216 C213 108.5(8) . . ?
 C221 C216 H21E 110.0 . . ?
 C221 C216 H21F 110.0 . . ?
 N25 C217 C214 107.6(6) . . ?
 N25 C217 C218 109.7(7) . . ?
 N25 C217 C219 110.9(7) . . ?
 C214 C217 C218 109.3(7) . . ?
 C214 C217 C219 109.5(7) . . ?
 C219 C217 C218 109.8(7) . . ?
 C217 C218 H21G 109.9 . . ?
 C217 C218 H21H 109.9 . . ?
 C217 C218 C220 109.0(7) . . ?
 H21G C218 H21H 108.3 . . ?
 C220 C218 H21G 109.9 . . ?
 C220 C218 H21H 109.9 . . ?
 C217 C219 H21I 110.1 . . ?
 C217 C219 H21J 110.1 . . ?
 C217 C219 C221 107.8(7) . . ?
 H21I C219 H21J 108.5 . . ?
 C221 C219 H21I 110.1 . . ?
 C221 C219 H21J 110.1 . . ?
 C215 C220 C218 109.5(7) . . ?
 C215 C220 H220 109.2 . . ?
 C218 C220 H220 109.2 . . ?
 C222 C220 C215 109.9(9) . . ?
 C222 C220 C218 109.8(8) . . ?
 C222 C220 H220 109.2 . . ?
 C216 C221 C219 110.4(7) . . ?
 C216 C221 H221 108.9 . . ?
 C216 C221 C222 110.2(9) . . ?
 C219 C221 H221 108.9 . . ?
 C222 C221 C219 109.5(8) . . ?
 C222 C221 H221 108.9 . . ?
 C220 C222 C221 109.7(7) . . ?
 C220 C222 H22A 109.7 . . ?
 C220 C222 H22B 109.7 . . ?
 C221 C222 H22A 109.7 . . ?
 C221 C222 H22B 109.7 . . ?
 H22A C222 H22B 108.2 . . ?
 N24 C223 H223 123.4 . . ?
 N26 C223 N24 113.3(8) . . ?
 N26 C223 H223 123.4 . . ?
 N24 C224 H224 125.1 . . ?
 N25 C224 N24 109.7(8) . . ?
 N25 C224 H224 125.1 . . ?
 C1S O1S H1S 109.5 . . ?
 O1S C1S H1SA 109.5 . . ?
 O1S C1S H1SB 109.5 . . ?
 O1S C1S H1SC 109.5 . . ?
 H1SA C1S H1SB 109.5 . . ?
 H1SA C1S H1SC 109.5 . . ?
 H1SB C1S H1SC 109.5 . . ?

_shelx_res_file
;
TITL pot_cd008_1_b.res in P2(1)/c
    pot_cd008_1.res
    created by SHELXL-2017/1 at 16:18:42 on 26-Jul-2021
REM Old TITL pot_Cd008_1 in P21/c #14
REM SHELXT solution in P2(1)/c
REM R1 0.194, Rweak 0.005, Alpha 0.117, Orientation as input
REM Formula found by SHELXT: C38 N14 O10 Cd2
CELL 0.71073 14.4331 12.1592 25.3803 90 104.848 90
ZERR 8 0.0006 0.0006 0.0012 0 0.002 0
LATT 1
SYMM -X,0.5+Y,0.5-Z
SFAC C H Cd N O
UNIT 124 192 8 64 60
DFIX 0.85 0.01 O7 H7
DFIX 0.85 0.01 O8 H8
DANG 1.901483 0.02 C7 H7
DANG 2.90692 0.02 Cd1 H7
DANG 1.854477 0.02 C8 H8
DANG 2.820711 0.02 Cd2 H8
RIGU O8 C8
RIGU 0.001 0.001 O51 N5 O52 O53
ISOR 0.01 0.02 O8

L.S. 6
PLAN  20
SIZE 0.25 0.18 0.07
TEMP 25(2)
BOND $H
LIST 6
fmap 2
acta
SHEL 999 0.84
OMIT 2 7 1
OMIT -2 6 5
OMIT -2 6 1
OMIT -4 7 1
REM <olex2.extras>
REM <HklSrc "%.\\pot_Cd008_1.hkl">
REM </olex2.extras>

WGHT    0.019300   47.342800
FVAR       0.13444
CD1   3    0.624784    0.750981    0.655473    11.00000    0.04196    0.02857 =
         0.04659    0.00432    0.01480   -0.00635
O7    5    0.583858    0.876969    0.714407    11.00000    0.06356    0.04841 =
         0.07346   -0.01577    0.02435    0.00001
H7    2    0.537038    0.867609    0.729092    11.00000   -1.50000
O31   5    0.740770    0.672670    0.730398    11.00000    0.05271    0.06373 =
         0.07408    0.00131    0.01992   -0.01541
O32   5    0.796394    0.817121    0.705278    11.00000    0.05926    0.06273 =
         0.08571    0.02891    0.02562    0.01012
O33   5    0.881710    0.726174    0.773234    11.00000    0.06931    0.08440 =
         0.06225    0.00426   -0.00940    0.01066
O41   5    0.482179    0.674836    0.677329    11.00000    0.07870    0.05913 =
         0.08248    0.01690    0.04621    0.00497
O42   5    0.453746    0.761852    0.601909    11.00000    0.04983    0.07428 =
         0.08406    0.00394    0.02537   -0.01846
O43   5    0.336915    0.693861    0.627352    11.00000    0.05828    0.16191 =
         0.15485   -0.00823    0.04295   -0.04953
N3    4    0.807671    0.737621    0.737352    11.00000    0.04655    0.04967 =
         0.04403   -0.01093    0.01015    0.00951
N4    4    0.423895    0.707576    0.634937    11.00000    0.05127    0.05821 =
         0.08175   -0.00813    0.03473   -0.01722
N11   4    0.631364    0.590529    0.611959    11.00000    0.03416    0.03559 =
         0.04827   -0.00058    0.01522   -0.00354
N12   4    0.687113    0.442322    0.581355    11.00000    0.02906    0.03059 =
         0.04494    0.00334    0.00501   -0.00503
N13   4    0.599021    0.461440    0.547228    11.00000    0.03711    0.03931 =
         0.06889   -0.00331   -0.00120    0.00290
N14   4    0.644176   -0.110326    0.600201    11.00000    0.04055    0.03063 =
         0.04854    0.00936    0.01837    0.00038
N15   4    0.694650    0.041576    0.573248    11.00000    0.03378    0.02858 =
         0.03799    0.00849    0.01197   -0.00426
N16   4    0.602807    0.028380    0.542268    11.00000    0.04259    0.05436 =
         0.05318    0.02056   -0.00147   -0.02052
C7    1    0.606993    0.990382    0.715455    11.00000    0.08419    0.05526 =
         0.08522   -0.01610    0.02225    0.00431
AFIX 137
H7A   2    0.576331    1.022986    0.680942    11.00000   -1.50000
H7B   2    0.675183    0.998850    0.722347    11.00000   -1.50000
H7C   2    0.585134    1.026118    0.743784    11.00000   -1.50000
AFIX   0
C111  1    0.570139    0.551234    0.567064    11.00000    0.03369    0.04594 =
         0.05623   -0.00015    0.00465    0.00268
AFIX  43
H111  2    0.511778    0.584820    0.551166    11.00000   -1.20000
AFIX   0
C112  1    0.703800    0.520293    0.619323    11.00000    0.03833    0.03848 =
         0.04280   -0.00329    0.01169   -0.00798
AFIX  43
H112  2    0.759366    0.524990    0.647538    11.00000   -1.20000
AFIX   0
C113  1    0.745621    0.347220    0.572798    11.00000    0.03394    0.03490 =
         0.04316    0.00463    0.01004   -0.00860
C114  1    0.689627    0.242248    0.577018    11.00000    0.02896    0.03112 =
         0.03787    0.00325    0.01149   -0.00444
AFIX  23
H11A  2    0.628236    0.243471    0.550141    11.00000   -1.20000
H11B  2    0.678008    0.237056    0.612924    11.00000   -1.20000
AFIX   0
C115  1    0.841515    0.345382    0.614482    11.00000    0.03505    0.03143 =
         0.06026    0.00467    0.01230   -0.00980
AFIX  23
H11C  2    0.875004    0.414022    0.613005    11.00000   -1.20000
H11D  2    0.831786    0.337943    0.650739    11.00000   -1.20000
AFIX   0
C116  1    0.759435    0.354582    0.514469    11.00000    0.04331    0.04078 =
         0.04916    0.01425    0.02264   -0.00228
AFIX  23
H11E  2    0.697563    0.355755    0.488026    11.00000   -1.20000
H11F  2    0.793349    0.421667    0.510456    11.00000   -1.20000
AFIX   0
C117  1    0.748653    0.143296    0.567011    11.00000    0.03490    0.01925 =
         0.04194    0.00162    0.01060   -0.01182
C118  1    0.846738    0.139236    0.608847    11.00000    0.02918    0.02930 =
         0.05428    0.00483    0.00759   -0.00071
AFIX  23
H11G  2    0.883791    0.077242    0.601451    11.00000   -1.20000
H11H  2    0.838506    0.131464    0.645414    11.00000   -1.20000
AFIX   0
C119  1    0.762841    0.148083    0.509635    11.00000    0.04239    0.02662 =
         0.04658    0.00608    0.02534    0.00032
AFIX  23
H11I  2    0.701204    0.148009    0.482969    11.00000   -1.20000
H11J  2    0.798888    0.084480    0.503074    11.00000   -1.20000
AFIX   0
C120  1    0.900289    0.251911    0.603410    11.00000    0.02499    0.04143 =
         0.06964   -0.00641    0.00711   -0.00359
AFIX  13
H120  2    0.962982    0.252811    0.629958    11.00000   -1.20000
AFIX   0
C121  1    0.817580    0.253632    0.504564    11.00000    0.04298    0.04451 =
         0.05237    0.02937    0.02548    0.00198
AFIX  13
H121  2    0.827794    0.257997    0.467908    11.00000   -1.20000
AFIX   0
C122  1    0.914068    0.256853    0.546682    11.00000    0.04445    0.03380 =
         0.09615    0.01405    0.03367   -0.00467
AFIX  23
H12A  2    0.952907    0.195074    0.540989    11.00000   -1.20000
H12B  2    0.947603    0.324022    0.542330    11.00000   -1.20000
AFIX   0
C123  1    0.575800   -0.064077    0.559887    11.00000    0.04389    0.04046 =
         0.04859    0.01154    0.00605   -0.02078
AFIX  43
H123  2    0.515503   -0.094930    0.546037    11.00000   -1.20000
AFIX   0
C124  1    0.717501   -0.040476    0.606696    11.00000    0.02702    0.03662 =
         0.04929    0.00509    0.01059   -0.00444
AFIX  43
H124  2    0.776641   -0.049365    0.631677    11.00000   -1.20000
AFIX   0

CD2   3    0.075507    0.752998    0.656759    11.00000    0.05018    0.03093 =
         0.05877    0.00374    0.02205   -0.00815
O8    5    0.013979    0.857243    0.716373    11.00000    0.11017    0.09078 =
         0.15899   -0.04592    0.08888   -0.03230
H8    2   -0.038999    0.835007    0.722031    11.00000   -1.50000
O51   5    0.152618    0.654610    0.744074    11.00000    0.13323    0.10669 =
         0.06953    0.00790    0.02103   -0.03298
O52   5    0.226210    0.780490    0.716056    11.00000    0.07577    0.09701 =
         0.07177    0.02783    0.01218    0.00025
O53   5    0.292523    0.704625    0.791818    11.00000    0.13765    0.08280 =
         0.06763    0.00176   -0.01137    0.01210
O61   5   -0.078650    0.663018    0.647314    11.00000    0.05801    0.05778 =
         0.07210    0.00293    0.02009   -0.00795
O62   5   -0.070075    0.779080    0.586696    11.00000    0.05150    0.07379 =
         0.12756    0.04441    0.02517   -0.01054
O63   5   -0.205257    0.708303    0.584224    11.00000    0.04525    0.10765 =
         0.10022    0.01470    0.01253   -0.01674
N5    4    0.224021    0.710959    0.751499    11.00000    0.10155    0.05484 =
         0.04084   -0.00599    0.01978    0.00723
N6    4   -0.119875    0.713833    0.606131    11.00000    0.04228    0.05828 =
         0.07164   -0.00138    0.02548   -0.01136
N21   4    0.114009    0.600086    0.615648    11.00000    0.03782    0.04105 =
         0.05139   -0.00559    0.01323   -0.01031
N22   4    0.184035    0.450685    0.596229    11.00000    0.03400    0.03329 =
         0.04266    0.00985    0.00561   -0.01100
N23   4    0.104147    0.465492    0.554614    11.00000    0.04716    0.03520 =
         0.04842    0.00779    0.00301   -0.00601
N24   4    0.119243   -0.098611    0.612923    11.00000    0.04221    0.02755 =
         0.05939    0.00544    0.01125   -0.01657
N25   4    0.186165    0.050157    0.594134    11.00000    0.02985    0.03045 =
         0.04519    0.00889    0.00843   -0.01024
N26   4    0.101871    0.040710    0.554161    11.00000    0.03602    0.04420 =
         0.04858    0.01284    0.00689   -0.00915
C8    1    0.027567    0.964822    0.733926    11.00000    0.10671    0.07353 =
         0.10460   -0.03321    0.01628    0.00995
AFIX 137
H8A   2    0.003499    1.013427    0.703708    11.00000   -1.50000
H8B   2    0.094741    0.978167    0.748854    11.00000   -1.50000
H8C   2   -0.006083    0.977733    0.761431    11.00000   -1.50000
AFIX   0
C211  1    0.066163    0.555349    0.567844    11.00000    0.03843    0.03656 =
         0.05138    0.00250    0.00947   -0.00335
AFIX  43
H211  2    0.010464    0.586103    0.546009    11.00000   -1.20000
AFIX   0
C212  1    0.187257    0.530937    0.631909    11.00000    0.04196    0.04488 =
         0.04372   -0.00746    0.01169   -0.00823
AFIX  43
H212  2    0.234782    0.538099    0.664299    11.00000   -1.20000
AFIX   0
C213  1    0.248035    0.353004    0.597462    11.00000    0.03859    0.03542 =
         0.03998    0.00424    0.01535   -0.01138
C214  1    0.185865    0.249428    0.595256    11.00000    0.03789    0.03725 =
         0.03687    0.00620    0.01022   -0.01885
AFIX  23
H21A  2    0.159179    0.247601    0.626648    11.00000   -1.20000
H21B  2    0.133264    0.250707    0.562605    11.00000   -1.20000
AFIX   0
C215  1    0.328303    0.352522    0.649673    11.00000    0.03821    0.03920 =
         0.05648    0.00287   -0.00044   -0.01088
AFIX  23
H21C  2    0.301760    0.349501    0.681099    11.00000   -1.20000
H21D  2    0.366283    0.419020    0.652065    11.00000   -1.20000
AFIX   0
C216  1    0.287849    0.356742    0.547243    11.00000    0.06235    0.04203 =
         0.06759    0.00725    0.03032   -0.01656
AFIX  23
H21E  2    0.235638    0.357459    0.514398    11.00000   -1.20000
H21F  2    0.325578    0.422959    0.547822    11.00000   -1.20000
AFIX   0
C217  1    0.247630    0.147435    0.595025    11.00000    0.03396    0.02455 =
         0.04570    0.00765    0.01179   -0.01193
C218  1    0.330377    0.146199    0.646968    11.00000    0.03425    0.03627 =
         0.06494    0.01180    0.01159   -0.00350
AFIX  23
H21G  2    0.370113    0.081804    0.647115    11.00000   -1.20000
H21H  2    0.305070    0.143095    0.678846    11.00000   -1.20000
AFIX   0
C219  1    0.287766    0.149721    0.544842    11.00000    0.05086    0.02994 =
         0.05502   -0.00348    0.02799   -0.00939
AFIX  23
H21I  2    0.235812    0.149471    0.511872    11.00000   -1.20000
H21J  2    0.327437    0.085482    0.544456    11.00000   -1.20000
AFIX   0
C220  1    0.390857    0.251629    0.648635    11.00000    0.03207    0.04230 =
         0.07569   -0.00671    0.00440   -0.00585
AFIX  13
H220  2    0.443950    0.250916    0.681652    11.00000   -1.20000
AFIX   0
C221  1    0.349105    0.257420    0.547728    11.00000    0.06030    0.03595 =
         0.07697    0.00725    0.04806   -0.01655
AFIX  13
H221  2    0.375915    0.260000    0.515967    11.00000   -1.20000
AFIX   0
C222  1    0.430888    0.255793    0.599258    11.00000    0.04164    0.03568 =
         0.11826   -0.00429    0.03142   -0.01723
AFIX  23
H22A  2    0.471137    0.192039    0.598937    11.00000   -1.20000
H22B  2    0.469929    0.321216    0.600732    11.00000   -1.20000
AFIX   0
C223  1    0.064602   -0.050546    0.567287    11.00000    0.02879    0.03341 =
         0.05084   -0.00263    0.01354   -0.00927
AFIX  43
H223  2    0.006524   -0.079330    0.547275    11.00000   -1.20000
AFIX   0
C224  1    0.195325   -0.033545    0.627876    11.00000    0.03758    0.03180 =
         0.05726    0.00766    0.00525   -0.00523
AFIX  43
H224  2    0.247253   -0.045378    0.657710    11.00000   -1.20000
AFIX   0

O1S   5    0.407360    0.881729    0.729623    11.00000    0.07285    0.08490 =
         0.10982   -0.03807    0.04268   -0.01151
AFIX 147
H1S   2    0.365225    0.834712    0.723251    11.00000   -1.50000
AFIX   0
C1S   1    0.399921    0.944686    0.774688    11.00000    0.08332    0.08333 =
         0.09413   -0.03745    0.00205    0.03055
AFIX 137
H1SA  2    0.338338    0.979836    0.766812    11.00000   -1.50000
H1SB  2    0.449372    0.999584    0.782216    11.00000   -1.50000
H1SC  2    0.406965    0.897713    0.805868    11.00000   -1.50000
AFIX   0
HKLF 4


REM  pot_cd008_1_b.res in P2(1)/c
REM R1 =  0.0724 for    5278 Fo > 4sig(Fo)  and  0.0980 for all    7600 data
REM    587 parameters refined using     33 restraints

END

WGHT      0.0194     47.3203

REM Highest difference peak  1.368,  deepest hole -1.045,  1-sigma level  0.115
Q1    1   0.1337  0.7605  0.6861  11.00000  0.05    1.37
Q2    1   0.1390  0.7244  0.6782  11.00000  0.05    1.32
Q3    1   0.6485  0.7830  0.6909  11.00000  0.05    1.21
Q4    1   0.6636  0.6998  0.6824  11.00000  0.05    0.96
Q5    1   0.6341  0.6799  0.6714  11.00000  0.05    0.94
Q6    1  -0.0151  0.8813  0.6840  11.00000  0.05    0.71
Q7    1   0.3523  0.2191  0.4919  11.00000  0.05    0.65
Q8    1   0.5669  0.7753  0.6652  11.00000  0.05    0.60
Q9    1   0.5882  0.7640  0.6761  11.00000  0.05    0.53
Q10   1   0.5005  0.7755  0.6597  11.00000  0.05    0.52
Q11   1   0.0424  0.8484  0.7365  11.00000  0.05    0.51
Q12   1   0.6066  0.7440  0.6079  11.00000  0.05    0.50
Q13   1   0.0661  0.7347  0.6131  11.00000  0.05    0.47
Q14   1   0.3487  0.7451  0.7908  11.00000  0.05    0.47
Q15   1   0.2291  0.8503  0.7433  11.00000  0.05    0.46
Q16   1   0.2042  0.7344  0.6379  11.00000  0.05    0.42
Q17   1   0.8478  0.2561  0.5338  11.00000  0.05    0.40
Q18   1   0.6026  0.6818  0.6216  11.00000  0.05    0.40
Q19   1   0.2349  0.7431  0.7197  11.00000  0.05    0.39
Q20   1   0.2138  0.6675  0.7518  11.00000  0.05    0.39
;
_shelx_res_checksum                43423
_shelx_hkl_file
;
   0  -1   0   -5.40    0.30
   0  -2   0 5564.64  236.98
   0  -2   0 5319.17  264.37
   0  -2   0 5271.17  226.08
   0  -2   0 5363.36  226.18
   0   2   0 5161.68  226.08
   0   2   0 5476.55  236.88
   0   2   0 5451.15  246.58
   0   2   0 5485.15  264.37
   0  -3   0    2.80    1.20
   0  -3   0   -0.10    1.00
   0  -3   0   -0.10    1.00
   0  -3   0    1.70    1.30
   0   3   0    1.20    1.10
   0   3   0    2.00    0.80
   0   3   0    0.60    1.00
   0   3   0    0.60    1.10
   0   3   0    1.10    1.20
   0  -4   0 2685.23  115.99
   0  -4   0 2587.34  129.39
   0  -4   0 2638.64  111.39
   0  -4   0 2667.43  111.39
   0   4   0 2689.63  111.29
   0   4   0 2707.13  116.39
   0   4   0 2484.95  110.69
   0   4   0 2634.44  119.59
   0   4   0 2668.73  129.39
   0  -5   0    0.50    1.20
   0  -5   0   -0.40    1.50
   0  -5   0    0.90    1.10
   0  -5   0    4.40    1.30
   0   5   0   -0.30    1.20
   0   5   0    3.20    0.90
   0   5   0    3.20    1.40
   0   5   0    1.70    1.20
   0   5   0    2.10    1.40
   0  -6   0 1199.78   50.39
   0  -6   0 1170.18   52.79
   0  -6   0 1233.48   50.39
   0   6   0 1232.28   50.39
   0   6   0 1203.48   54.09
   0   6   0 1135.99   50.39
   0   6   0 1176.68   52.79
   0   6   0 1181.68   58.89
   0  -7   0    0.20    1.40
   0  -7   0    0.90    1.40
   0  -7   0    1.50    1.60
   0   7   0    1.80    1.70
   0   7   0    1.40    1.50
   0   7   0   -1.80    1.50
   0   7   0    1.20    1.40
   0   7   0   -0.70    0.90
   0  -8   0  975.60   39.30
   0  -8   0  886.31   41.20
   0  -8   0  925.41   39.30
   0   8   0  939.21   45.90
   0   8   0  903.71   41.80
   0   8   0  927.31   39.30
   0   8   0  878.81   41.10
   0  -9   0   -1.40    1.60
   0  -9   0    1.50    1.80
   0   9   0   -0.60    2.00
   0   9   0   -0.10    2.10
   0   9   0    0.10    1.10
   0 -10   0 1446.56   60.39
   0  10   0 1454.45   60.39
   0  10   0 1394.16   64.29
   0  10   0 1377.06   63.19
   0 -11   0    2.00    2.00
   0  11   0   -0.80    2.20
   0  11   0    1.40    2.60
   0 -12   0  189.08    9.70
   0  12   0  193.98    9.70
   0  12   0  182.88   10.40
   0 -13   0    0.50    2.60
   0  13   0    2.60    2.40
   0  13   0    1.30    2.70
   0 -14   0  161.98    9.10
   0  14   0  165.58    9.90
   0  14   0  171.38    9.20
   1  14   0   -1.30    3.00
   1  14   0   -0.70    2.70
  -1 -14   0    3.50    2.80
   1  13   0    8.70    2.80
   1  13   0    7.40    3.20
  -1 -13   0    7.70    2.90
   1  12   0    1.20    2.70
   1  12   0   -0.70    2.30
  -1 -12   0   -0.80    2.40
   1  11   0   12.30    2.80
   1  11   0    6.60    2.80
   1  11   0   11.70    1.70
  -1 -11   0   13.40    2.90
   1  10   0    9.50    2.60
   1  10   0    8.00    2.70
   1  10   0   10.10    1.60
  -1 -10   0   10.10    2.60
   1   9   0   15.60    2.30
   1   9   0   11.50    1.60
   1   9   0   14.20    2.70
  -1  -9   0   10.50    2.30
   1   8   0   -1.70    1.90
   1   8   0    1.70    1.20
   1   8   0    0.60    1.60
   1   8   0   -0.10    1.80
   1   8   0    0.30    1.60
  -1  -8   0   -0.10    1.40
  -1  -8   0   -0.60    1.60
  -1  -8   0   -2.60    1.60
   1   7   0   16.80    2.30
   1   7   0   15.40    2.10
   1   7   0   13.80    1.60
   1   7   0   11.70    1.90
   1   7   0    8.40    2.10
  -1  -7   0   11.30    2.00
  -1  -7   0   14.60    2.10
  -1  -7   0   10.30    1.80
   1   6   0    3.80    1.60
   1   6   0    7.80    1.60
   1   6   0    3.80    1.70
   1   6   0    4.70    1.60
   1   6   0    5.00    1.20
  -1  -6   0    3.90    1.60
  -1  -6   0    5.60    1.70
  -1  -6   0    5.90    1.60
   1   5   0   10.50    1.60
   1   5   0   12.60    1.70
   1   5   0   12.40    1.30
   1   5   0   11.20    1.60
   1   5   0   12.20    1.70
  -1  -5   0   11.00    1.60
  -1  -5   0   11.60    1.60
  -1  -5   0    8.00    1.30
   1   4   0   35.50    2.60
   1   4   0   35.20    2.30
   1   4   0   37.50    2.70
   1   4   0   37.00    2.40
  -1  -4   0   38.10    2.40
  -1  -4   0   34.40    2.30
  -1  -4   0   37.80    2.60
   1   3   0   51.49    3.00
   1   3   0   50.09    3.10
   1   3   0   47.70    2.70
   1   3   0   48.10    2.60
  -1  -3   0   48.60    2.70
  -1  -3   0   52.79    2.90
  -1  -3   0   47.80    2.70
   1   2   0   70.99    3.80
   1   2   0   70.99    3.30
   1   2   0   70.09    3.30
   1   2   0   66.39    3.50
  -1  -2   0   71.59    3.40
  -1  -2   0   68.59    3.20
   1   1   0   56.29    2.40
   1   1   0   57.89    2.40
   1   1   0   55.59    2.50
  -1  -1   0   55.29    2.40
  -1  -1   0   45.40    2.40
   1   0   0    6.80    0.40
   1  -1   0   56.59    2.50
   1  -1   0   58.99    3.00
   1  -1   0   55.39    2.50
  -1   1   0   56.59    3.00
  -1   1   0   53.89    2.50
  -1   1   0   57.89    2.50
   1  -2   0   70.69    3.30
   1  -2   0   71.69    3.30
   1  -2   0   76.79    4.00
   1  -2   0   71.39    3.50
  -1   2   0   74.09    3.60
  -1   2   0   69.29    3.30
  -1   2   0   69.59    3.30
   1  -3   0   53.89    2.70
   1  -3   0   51.59    3.00
   1  -3   0   49.00    2.70
   1  -3   0   50.29    2.50
   1  -3   0   50.89    3.50
  -1   3   0   49.50    2.70
  -1   3   0   49.10    3.00
   1  -4   0   36.70    2.70
   1  -4   0   33.50    2.30
   1  -4   0   38.40    2.30
   1  -4   0   37.30    2.90
  -1   4   0   30.10    2.60
  -1   4   0   34.80    2.20
  -1   4   0   34.50    2.70
   1  -5   0    9.70    1.40
   1  -5   0    8.80    1.40
   1  -5   0   11.60    1.70
   1  -5   0   11.60    2.00
  -1   5   0   11.60    1.70
  -1   5   0    9.70    0.90
  -1   5   0   13.10    1.60
  -1   5   0   14.30    1.90
   1  -6   0    5.80    1.50
   1  -6   0    5.90    1.60
   1  -6   0    1.20    1.60
   1  -6   0    4.00    1.80
  -1   6   0    1.10    1.70
  -1   6   0    4.70    1.30
  -1   6   0    5.70    1.60
  -1   6   0    2.80    0.80
  -1   6   0    6.50    1.80
   1  -7   0   13.50    2.30
   1  -7   0   14.40    1.90
   1  -7   0   11.80    1.80
   1  -7   0   14.00    2.40
  -1   7   0   12.10    1.80
  -1   7   0   16.50    2.40
  -1   7   0   10.10    2.10
  -1   7   0   18.20    2.10
   1  -8   0   -5.40    1.70
   1  -8   0    0.70    1.70
   1  -8   0   -2.40    1.40
  -1   8   0    1.20    1.70
  -1   8   0    3.00    1.70
  -1   8   0   -3.30    1.90
   1  -9   0   14.00    2.20
   1  -9   0   11.90    2.30
  -1   9   0   11.20    2.20
  -1   9   0    8.70    2.50
   1 -10   0   10.60    2.50
  -1  10   0    9.80    2.50
  -1  10   0    2.50    2.70
   1 -11   0   11.00    2.60
  -1  11   0   13.60    3.00
  -1  11   0   16.00    2.80
   1 -12   0   -2.10    2.30
  -1  12   0   -0.70    2.10
  -1  12   0   -3.50    2.50
   1 -13   0    8.10    2.70
  -1  13   0    6.50    2.70
  -1  13   0    4.40    2.90
   1 -14   0   -4.50    2.40
  -1  14   0    0.30    2.70
  -1  14   0    0.30    2.90
   2  14   0   32.40    4.60
   2  14   0   34.90    4.10
  -2 -14   0   26.60    3.90
   2  13   0  188.18    9.60
   2  13   0  183.08   10.50
  -2 -13   0  185.38    9.80
   2  12   0   19.10    3.40
   2  12   0   16.90    2.10
   2  12   0   30.50    3.70
  -2 -12   0   22.30    3.40
   2  11   0  309.17   14.20
   2  11   0  302.37   14.90
   2  11   0  279.17   14.30
  -2 -11   0  322.37   14.20
   2  10   0    4.20    1.60
   2  10   0    1.10    2.50
   2  10   0    1.00    2.20
  -2 -10   0    2.00    2.00
   2   9   0  446.26   21.10
   2   9   0  463.45   20.10
   2   9   0  444.86   21.10
   2   9   0  452.05   23.30
  -2  -9   0  462.15   20.10
   2   8   0   34.70    3.00
   2   8   0   24.50    3.00
   2   8   0   25.40    2.60
   2   8   0   30.00    2.90
   2   8   0   24.30    3.00
  -2  -8   0   34.60    3.20
  -2  -8   0   26.50    2.70
  -2  -8   0   32.70    3.00
   2   7   0 1279.37   56.69
   2   7   0 1362.76   66.29
   2   7   0 1386.16   56.79
   2   7   0 1336.77   60.99
   2   7   0 1308.57   59.49
  -2  -7   0 1336.47   59.49
  -2  -7   0 1299.27   56.79
  -2  -7   0 1415.86   56.79
   2   6   0  346.47   18.50
   2   6   0  364.16   16.00
   2   6   0  358.16   16.80
   2   6   0  377.26   16.00
  -2  -6   0  360.46   16.70
  -2  -6   0  378.26   16.00
  -2  -6   0  365.36   16.00
   2   5   0  404.96   18.00
   2   5   0  413.86   18.00
   2   5   0  426.76   18.90
   2   5   0  416.06   20.90
  -2  -5   0  412.66   18.80
  -2  -5   0  419.36   18.00
  -2  -5   0  414.16   17.90
   2   4   0  324.07   14.70
   2   4   0  350.56   15.40
   2   4   0  330.57   17.10
   2   4   0  348.07   14.70
  -2  -4   0  332.27   14.70
  -2  -4   0  338.97   14.70
  -2  -4   0  353.96   15.40
   2   3   0  457.75   19.10
   2   3   0  431.46   19.10
   2   3   0  439.16   22.20
   2   3   0  447.76   20.00
  -2  -3   0  431.96   19.10
  -2  -3   0  475.55   20.10
   2   2   0   -1.10    0.80
   2   2   0    0.90    0.90
  -2  -2   0   -0.10    0.80
  -2  -2   0   -1.00    0.90
  -2  -2   0    0.10    0.90
   2   1   0 2427.16  101.29
   2   1   0 2676.03  106.49
   2   1   0 2231.68  101.29
  -2  -1   0 2425.66  101.29
  -2  -1   0 2306.17  101.39
   2   0   0  776.22   30.60
   2   0   0  722.83   30.70
   2   0   0  708.33   35.80
  -2   0   0  720.23   30.60
  -2   0   0  691.03   35.90
  -2   0   0  745.63   30.60
   2  -1   0 2617.34  107.69
   2  -1   0 2483.35  107.69
   2  -1   0 2603.24  126.09
  -2   1   0 2688.13  107.69
  -2   1   0 2478.25  126.09
  -2   1   0 2532.85  107.59
   2  -2   0   -1.50    1.10
   2  -2   0    0.30    0.70
   2  -2   0   -0.40    0.70
  -2   2   0   -0.60    1.00
  -2   2   0    0.40    0.70
   2  -3   0  440.86   19.20
   2  -3   0  463.55   22.60
   2  -3   0  460.25   20.20
   2  -3   0  455.55   19.20
  -2   3   0  454.25   19.20
  -2   3   0  439.16   22.60
  -2   3   0  442.06   19.20
   2  -4   0  337.07   17.40
   2  -4   0  355.16   15.60
   2  -4   0  330.07   14.70
   2  -4   0  345.97   14.70
   2  -4   0  357.46   15.60
  -2   4   0  324.27   14.70
   2  -5   0  407.26   18.70
   2  -5   0  423.76   21.00
   2  -5   0  402.16   17.70
   2  -5   0  421.36   18.70
   2  -5   0  410.76   17.70
  -2   5   0  415.86   18.70
  -2   5   0  398.56   17.70
  -2   5   0  412.36   17.70
   2  -6   0  374.86   17.20
   2  -6   0  385.86   16.30
   2  -6   0  357.86   16.30
   2  -6   0  371.26   19.30
  -2   6   0  364.16   17.10
  -2   6   0  370.46   16.30
  -2   6   0  374.56   19.20
  -2   6   0  390.16   16.30
   2  -7   0 1350.26   56.19
   2  -7   0 1328.77   58.99
   2  -7   0 1294.67   56.19
   2  -7   0 1354.06   65.89
  -2   7   0 1282.57   56.19
  -2   7   0 1313.67   58.89
  -2   7   0 1374.86   65.89
   2  -8   0   30.60    2.80
   2  -8   0   39.90    3.10
   2  -8   0   32.10    3.20
  -2   8   0   27.70    3.10
  -2   8   0   27.40    2.60
   2  -9   0  486.15   20.10
   2  -9   0  428.06   19.90
  -2   9   0  432.46   21.00
  -2   9   0  465.95   20.00
   2 -10   0    0.80    2.10
  -2  10   0   -2.40    1.80
  -2  10   0    0.00    2.50
   2 -11   0  292.27   13.80
  -2  11   0  290.47   14.70
  -2  11   0  306.07   13.80
   2 -12   0   21.30    3.20
  -2  12   0   27.80    3.20
  -2  12   0   17.40    3.30
   2 -13   0  188.58    9.90
  -2  13   0  195.18   10.00
   2 -14   0   33.00    3.90
  -2  14   0   21.50    3.60
   3  14   0   17.10    3.50
   3  14   0   16.70    3.80
  -3 -14   0   11.10    3.20
   3  13   0    5.10    3.00
   3  13   0    5.50    3.10
  -3 -13   0    7.60    3.10
   3  12   0   33.80    3.20
   3  12   0   34.50    4.20
   3  12   0   48.00    4.30
  -3 -12   0   32.30    3.90
   3  11   0    1.70    2.10
   3  11   0    5.10    2.80
   3  11   0    6.40    1.80
  -3 -11   0   -0.70    2.20
   3  10   0   49.80    3.80
   3  10   0   49.70    4.80
   3  10   0   50.09    4.20
  -3 -10   0   50.79    4.20
   3   9   0    6.90    2.40
   3   9   0    5.20    2.00
   3   9   0    3.60    1.70
   3   9   0    3.00    1.90
  -3  -9   0    6.20    2.20
   3   8   0  130.89    7.50
   3   8   0  123.09    6.70
   3   8   0  124.79    7.10
   3   8   0  128.59    6.80
   3   8   0  131.49    6.60
  -3  -8   0  123.19    7.00
  -3  -8   0  135.49    6.70
   3   7   0    1.80    1.40
   3   7   0    2.00    1.80
   3   7   0   -0.10    1.40
   3   7   0   -1.40    1.60
  -3  -7   0    0.30    1.40
  -3  -7   0    1.10    1.70
  -3  -7   0    0.30    1.60
   3   6   0  124.69    6.00
   3   6   0  107.99    6.30
   3   6   0  122.49    6.70
   3   6   0  123.59    5.90
  -3  -6   0  122.99    5.90
  -3  -6   0  118.79    6.30
  -3  -6   0  113.19    5.90
   3   5   0    3.00    1.50
   3   5   0    2.90    1.20
   3   5   0    2.00    1.30
   3   5   0    2.90    1.20
  -3  -5   0    1.90    1.30
  -3  -5   0    1.10    1.30
  -3  -5   0    1.60    1.20
   3   4   0   64.19    3.70
   3   4   0   67.79    3.80
   3   4   0   64.09    3.50
   3   4   0   66.49    3.40
  -3  -4   0   65.29    3.50
  -3  -4   0   64.99    3.70
   3   3   0    9.00    1.30
   3   3   0    9.70    1.20
   3   3   0   14.10    1.40
   3   3   0   10.00    1.10
  -3  -3   0    8.80    1.30
  -3  -3   0   10.90    1.30
   3   2   0   16.50    1.30
   3   2   0   14.30    1.50
   3   2   0   14.90    1.40
  -3  -2   0   14.10    1.30
  -3  -2   0   14.10    1.30
  -3  -2   0   13.50    1.40
   3   1   0   19.20    1.40
   3   1   0   18.50    1.30
   3   1   0   21.20    1.90
  -3  -1   0   22.20    1.40
  -3  -1   0   17.90    1.40
   3   0   0  193.48    8.40
   3   0   0  194.58    9.80
   3   0   0  196.18    8.40
  -3   0   0  194.88    9.80
  -3   0   0  199.28    8.40
  -3   0   0  195.78    8.40
   3  -1   0   17.30    1.40
   3  -1   0   20.70    1.30
   3  -1   0   18.20    1.80
  -3   1   0   21.30    1.30
  -3   1   0   19.20    1.30
  -3   1   0   18.90    1.70
   3  -2   0   15.20    1.20
   3  -2   0   16.90    1.70
  -3   2   0   13.20    1.20
  -3   2   0   15.90    1.70
  -3   2   0   15.10    1.40
   3  -3   0    9.60    1.10
   3  -3   0   11.10    1.80
   3  -3   0   10.60    1.10
  -3   3   0   11.30    1.60
  -3   3   0   12.50    1.10
   3  -4   0   73.99    3.90
   3  -4   0   71.19    3.50
   3  -4   0   64.19    4.50
   3  -4   0   66.19    3.40
  -3   4   0   66.09    3.40
   3  -5   0    0.00    1.10
   3  -5   0    4.00    1.40
   3  -5   0    2.00    1.20
   3  -5   0    5.20    1.80
   3  -5   0    3.20    0.70
  -3   5   0    1.60    1.10
  -3   5   0    0.80    1.10
  -3   5   0    2.60    1.40
   3  -6   0  118.79    6.40
   3  -6   0  127.29    7.40
   3  -6   0  125.79    5.90
   3  -6   0  118.99    5.90
  -3   6   0  123.49    5.90
  -3   6   0  120.69    5.90
   3  -7   0   -0.60    2.10
   3  -7   0    1.70    1.40
   3  -7   0   -0.90    1.60
   3  -7   0    0.90    1.50
  -3   7   0    1.90    1.50
  -3   7   0   -0.40    1.30
  -3   7   0   -0.50    1.40
   3  -8   0  129.49    6.40
   3  -8   0  120.59    6.90
   3  -8   0  133.09    8.00
   3  -8   0  120.29    6.40
  -3   8   0  126.19    6.30
   3  -9   0    4.80    2.00
   3  -9   0    3.70    1.90
  -3   9   0    8.00    2.10
   3 -10   0   57.19    4.20
   3 -10   0   53.89    4.00
  -3  10   0   53.79    4.10
   3 -11   0    3.90    2.30
  -3  11   0    1.90    2.20
   3 -12   0   42.10    4.10
  -3  12   0   41.00    3.90
   3 -13   0    4.40    2.50
  -3  13   0    2.80    2.50
   3 -14   0   14.30    3.20
  -3  14   0   22.00    3.50
   4  14   0  117.99    7.30
   4  14   0  107.09    8.00
  -4 -14   0  102.49    7.20
   4  13   0   23.20    4.00
   4  13   0   15.10    3.30
  -4 -13   0   17.80    3.10
   4  12   0   88.49    5.60
   4  12   0   90.49    6.00
   4  12   0   90.19    6.70
  -4 -12   0   87.19    6.00
   4  11   0  102.79    6.20
   4  11   0   97.09    6.80
   4  11   0   99.09    6.10
  -4 -11   0  108.79    6.30
   4  10   0   71.69    4.80
   4  10   0   72.89    5.60
   4  10   0   75.29    4.80
  -4 -10   0   68.09    5.00
   4   9   0   38.20    3.60
   4   9   0   33.40    3.70
   4   9   0   38.30    3.60
   4   9   0   37.90    3.50
  -4  -9   0   40.40    3.60
   4   8   0  324.47   15.60
   4   8   0  322.97   14.80
   4   8   0  333.47   17.00
   4   8   0  335.27   14.80
  -4  -8   0  325.17   14.80
   4   7   0  190.18    8.80
   4   7   0  177.48   10.00
   4   7   0  196.38    8.90
   4   7   0  181.88    9.40
  -4  -7   0  178.38    9.20
  -4  -7   0  185.08    8.90
  -4  -7   0  196.58    8.90
   4   6   0 1164.28   50.69
   4   6   0 1181.88   53.09
   4   6   0 1207.08   58.99
   4   6   0 1217.18   50.69
  -4  -6   0 1184.28   50.69
  -4  -6   0 1210.68   53.09
  -4  -6   0 1213.48   50.69
   4   5   0  925.81   45.40
   4   5   0  909.11   40.90
   4   5   0  891.21   39.00
   4   5   0  950.40   39.00
  -4  -5   0  925.41   39.00
  -4  -5   0  914.31   40.90
   4   4   0 1062.89   51.29
   4   4   0 1083.19   44.10
   4   4   0  933.81   44.00
   4   4   0 1073.19   46.30
  -4  -4   0 1098.09   46.30
  -4  -4   0 1014.90   44.10
   4   3   0  431.46   18.10
   4   3   0  432.56   19.10
   4   3   0  413.56   18.10
  -4  -3   0  439.26   19.10
  -4  -3   0  405.76   18.10
   4   2   0  321.87   15.10
   4   2   0  380.06   16.00
   4   2   0  345.87   15.10
  -4  -2   0  402.06   16.00
  -4  -2   0  346.77   15.10
  -4  -2   0  325.97   15.10
   4   1   0  290.37   12.70
   4   1   0  301.17   13.50
   4   1   0  303.47   12.80
  -4  -1   0  316.07   12.80
  -4  -1   0  285.27   12.70
   4   0   0 1885.31   91.99
   4   0   0 1895.61   78.59
   4   0   0 1878.41   78.79
  -4   0   0 1927.91   78.49
  -4   0   0 1782.62   78.59
   4  -1   0  309.37   15.80
   4  -1   0  323.07   13.40
   4  -1   0  313.77   13.40
  -4   1   0  318.57   13.40
  -4   1   0  325.67   13.40
  -4   1   0  308.07   15.80
   4  -2   0  376.26   16.00
   4  -2   0  378.66   18.90
   4  -2   0  369.26   15.90
  -4   2   0  368.56   18.80
  -4   2   0  351.76   15.90
  -4   2   0  409.16   16.00
   4  -3   0  424.66   21.00
   4  -3   0  427.96   17.70
   4  -3   0  421.16   17.70
  -4   3   0  381.76   17.70
  -4   3   0  429.16   17.70
   4  -4   0 1129.19   52.59
   4  -4   0  979.40   44.70
   4  -4   0 1024.00   44.70
  -4   4   0 1076.79   52.59
  -4   4   0 1096.79   44.80
  -4   4   0 1068.29   44.70
   4  -5   0  900.71   39.80
   4  -5   0  953.10   41.90
   4  -5   0  954.30   46.90
   4  -5   0  937.51   39.90
  -4   5   0  987.50   39.90
  -4   5   0  921.21   46.80
   4  -6   0 1244.78   53.79
   4  -6   0 1207.88   60.09
   4  -6   0 1241.78   54.89
   4  -6   0 1199.38   51.19
   4  -6   0 1146.09   51.09
  -4   6   0 1178.28   51.09
  -4   6   0 1221.58   60.09
  -4   6   0 1243.48   51.19
   4  -7   0  198.18    8.90
   4  -7   0  194.98    9.60
   4  -7   0  184.68    8.90
   4  -7   0  184.08   10.80
  -4   7   0  179.88   10.60
  -4   7   0  195.58    8.90
  -4   7   0  196.78    8.90
   4  -8   0  314.47   16.90
   4  -8   0  323.07   14.10
   4  -8   0  301.87   14.10
  -4   8   0  316.57   14.00
   4  -9   0   33.20    3.10
   4  -9   0   39.20    3.40
  -4   9   0   37.00    3.40
   4 -10   0   71.19    4.80
   4 -10   0   75.89    5.00
  -4  10   0   78.79    4.80
   4 -11   0  102.29    6.10
  -4  11   0  110.49    6.20
   4 -12   0   95.69    6.10
  -4  12   0   99.69    6.10
   4 -13   0   20.80    3.30
  -4  13   0   23.70    3.40
   4 -14   0  110.79    6.90
   5  14   0   -5.00    3.10
   5  14   0   -2.10    2.80
  -5 -14   0   -1.50    2.90
   5  13   0   50.79    5.40
   5  13   0   59.39    4.90
  -5 -13   0   54.29    5.10
   5  12   0    1.40    2.80
   5  12   0    1.30    2.20
   5  12   0    0.80    2.00
  -5 -12   0    0.90    2.20
   5  11   0  101.59    6.30
   5  11   0  110.09    6.40
   5  11   0   98.09    7.10
  -5 -11   0  105.79    6.40
   5  10   0    0.10    2.20
   5  10   0    0.80    1.80
   5  10   0   -1.30    2.40
  -5 -10   0   -1.10    2.20
   5   9   0  172.98    8.50
   5   9   0  163.38    9.10
   5   9   0  174.08    9.40
  -5  -9   0  158.68    8.40
   5   8   0    3.10    1.70
   5   8   0    3.30    2.20
   5   8   0    1.50    1.90
   5   8   0    2.70    1.80
  -5  -8   0    2.50    2.00
   5   7   0  344.17   15.10
   5   7   0  337.87   15.10
   5   7   0  343.27   17.30
   5   7   0  340.67   16.00
  -5  -7   0  334.07   15.90
  -5  -7   0  331.87   15.10
   5   6   0    6.90    1.90
   5   6   0    7.00    1.50
   5   6   0    9.90    1.80
   5   6   0    5.90    1.60
  -5  -6   0    6.70    1.70
  -5  -6   0    9.50    1.90
   5   5   0  689.53   32.20
   5   5   0  713.83   30.60
   5   5   0  752.02   30.70
   5   5   0  701.93   35.50
  -5  -5   0  745.63   30.60
  -5  -5   0  708.23   32.10
  -5  -5   0  715.33   30.70
   5   4   0   13.30    1.40
   5   4   0   15.50    1.70
   5   4   0   14.50    1.90
   5   4   0   15.20    1.70
  -5  -4   0   19.50    1.80
  -5  -4   0   17.70    2.00
  -5  -4   0   15.60    1.80
   5   3   0  745.53   31.40
   5   3   0  725.63   33.00
   5   3   0  733.63   31.40
  -5  -3   0  748.73   31.40
  -5  -3   0  765.52   31.40
  -5  -3   0  730.33   33.00
   5   2   0   18.60    1.70
   5   2   0   37.00    2.50
   5   2   0   27.20    1.80
  -5  -2   0   23.60    1.90
  -5  -2   0   30.40    2.10
   5   1   0  932.41   41.70
   5   1   0  953.00   39.70
   5   1   0  905.21   46.20
   5   1   0  949.11   39.70
  -5  -1   0  989.60   39.70
  -5  -1   0  929.41   39.70
   5   0   0   24.40    1.90
   5   0   0   29.20    1.70
   5   0   0   26.90    1.70
  -5   0   0   30.70    1.60
  -5   0   0   26.30    1.70
   5  -1   0  964.30   40.10
   5  -1   0  947.01   40.10
   5  -1   0  952.50   47.00
  -5   1   0  970.90   47.00
  -5   1   0  934.51   40.10
  -5   1   0  959.00   40.10
   5  -2   0   31.00    1.90
   5  -2   0   34.10    2.60
   5  -2   0   26.10    1.70
  -5   2   0   23.30    1.70
  -5   2   0   28.90    1.80
  -5   2   0   29.00    2.30
   5  -3   0  752.92   31.60
   5  -3   0  771.92   31.60
   5  -3   0  755.02   37.30
  -5   3   0  716.83   31.60
   5  -4   0   15.40    1.50
   5  -4   0   16.50    2.40
   5  -4   0   16.00    1.50
  -5   4   0   16.20    1.60
  -5   4   0   15.20    1.50
  -5   4   0   17.40    2.20
   5  -5   0  742.53   30.80
   5  -5   0  706.63   30.80
   5  -5   0  738.93   32.50
   5  -5   0  708.33   36.40
  -5   5   0  720.13   30.80
  -5   5   0  719.23   36.30
  -5   5   0  740.93   30.80
   5  -6   0    7.00    2.30
   5  -6   0   10.60    1.60
   5  -6   0   10.70    1.60
   5  -6   0    7.50    1.90
  -5   6   0   11.00    1.70
  -5   6   0   10.40    2.20
  -5   6   0   13.80    1.60
   5  -7   0  337.67   18.20
   5  -7   0  338.47   16.20
   5  -7   0  366.86   15.30
   5  -7   0  341.37   15.20
   5  -7   0  339.27   15.90
   5  -8   0    4.30    1.80
   5  -8   0    1.50    2.60
   5  -8   0    4.60    1.70
   5  -9   0  160.48   10.30
   5  -9   0  159.78    8.30
   5  -9   0  190.38    8.50
   5 -10   0    2.20    2.00
   5 -10   0   -1.10    1.90
   5 -11   0   97.49    5.80
   5 -12   0   -0.60    2.10
   5 -13   0   51.49    4.50
   5 -14   0    0.60    2.50
   6  13   0   46.20    4.70
   6  13   0   43.90    5.10
  -6 -13   0   33.00    4.10
   6  12   0   34.10    3.90
   6  12   0   25.00    4.10
   6  12   0   24.70    3.20
  -6 -12   0   21.80    3.40
   6  11   0   50.09    4.50
   6  11   0   57.39    4.70
   6  11   0   58.49    5.20
  -6 -11   0   52.29    4.70
   6  10   0   73.19    5.80
   6  10   0   71.59    5.00
   6  10   0   65.19    5.00
  -6 -10   0   74.59    5.10
   6   9   0    5.40    2.30
   6   9   0    5.60    1.90
   6   9   0    9.30    2.80
  -6  -9   0    6.90    2.50
   6   8   0   83.39    5.70
   6   8   0   80.29    4.90
   6   8   0   85.29    5.10
   6   8   0   79.39    5.10
  -6  -8   0   79.99    5.00
   6   7   0  260.97   12.90
   6   7   0  295.27   14.60
   6   7   0  281.57   13.70
   6   7   0  305.57   13.00
  -6  -7   0  275.07   12.90
   6   6   0   95.89    5.30
   6   6   0   93.19    5.50
   6   6   0   90.79    5.00
   6   6   0   96.39    5.00
  -6  -6   0   87.89    5.00
  -6  -6   0   86.89    5.30
   6   5   0  116.39    6.10
   6   5   0  127.59    6.30
   6   5   0  117.19    5.70
  -6  -5   0  105.39    5.60
  -6  -5   0  104.39    5.70
  -6  -5   0  116.69    6.10
   6   4   0  191.48    9.90
   6   4   0  188.98    8.80
   6   4   0  203.28    8.80
   6   4   0  195.58    9.50
  -6  -4   0  201.78    8.80
  -6  -4   0  190.58    8.90
  -6  -4   0  201.18    9.40
   6   3   0  237.38   11.70
   6   3   0  283.47   12.50
   6   3   0  275.97   11.70
  -6  -3   0  258.87   11.60
  -6  -3   0  299.87   12.50
  -6  -3   0  250.37   11.70
   6   2   0  230.58    9.80
   6   2   0  217.38   10.60
   6   2   0  216.28    9.80
  -6  -2   0  216.28    9.80
  -6  -2   0  238.78    9.80
   6   1   0  387.76   18.80
   6   1   0  470.15   18.90
   6   1   0  451.95   21.90
   6   1   0  505.45   20.10
  -6  -1   0  405.96   18.80
   6   0   0  968.90   47.70
   6   0   0  961.40   40.80
   6   0   0 1006.60   40.90
  -6   0   0  948.21   40.80
   6  -1   0  506.65   19.90
   6  -1   0  459.85   23.40
   6  -1   0  443.76   19.80
  -6   1   0  449.86   19.80
  -6   1   0  484.75   23.30
   6  -2   0  228.88   11.60
   6  -2   0  227.28    9.70
   6  -2   0  232.68    9.70
  -6   2   0  237.38    9.70
  -6   2   0  186.08   11.40
   6  -3   0  271.17   12.10
   6  -3   0  291.07   14.60
  -6   3   0  253.37   12.10
  -6   3   0  299.87   14.50
  -6   3   0  292.47   12.10
   6  -4   0  197.28    8.70
   6  -4   0  191.48   10.70
   6  -4   0  202.08    8.80
  -6   4   0  189.58   10.50
  -6   4   0  194.88    8.80
  -6   4   0  207.58    8.70
   6  -5   0   92.69    5.30
   6  -5   0  125.59    7.00
   6  -5   0  107.49    5.30
  -6   5   0  125.49    6.80
  -6   5   0  103.89    5.30
  -6   5   0  124.09    5.50
   6  -6   0   98.19    4.90
   6  -6   0   98.99    4.90
   6  -6   0   97.99    5.80
   6  -6   0   96.09    6.40
  -6   6   0   99.69    4.90
  -6   6   0   94.49    6.10
  -6   6   0   92.39    5.00
   6  -7   0  272.07   12.60
   6  -7   0  291.97   15.30
   6  -7   0  270.97   12.50
  -6   7   0  287.17   12.60
   6  -8   0   82.79    4.30
   6  -8   0   87.69    4.80
   6  -8   0   80.39    4.70
   6  -8   0   79.29    6.30
  -6   8   0   82.79    4.90
   6  -9   0    6.60    2.00
   6  -9   0    6.10    3.10
   6  -9   0    3.70    1.90
  -6   9   0    4.30    2.10
   6 -10   0   68.89    4.60
   6 -10   0   68.79    4.50
  -6  10   0   73.19    4.90
   6 -11   0   56.99    4.20
  -6  11   0   43.80    4.10
   6 -12   0   20.00    3.00
  -6  12   0   24.60    3.40
   6 -13   0   40.50    4.10
   7  13   0    2.90    3.40
   7  13   0   13.00    3.40
  -7 -13   0   12.10    3.30
   7  12   0  103.79    7.80
   7  12   0  119.99    7.00
   7  12   0  115.29    7.20
  -7 -12   0  114.09    7.00
   7  11   0    7.50    2.60
   7  11   0   11.20    3.30
   7  11   0   14.50    2.90
  -7 -11   0   14.80    3.10
   7  10   0  112.29    7.50
   7  10   0  111.29    7.00
   7  10   0  122.19    6.80
  -7 -10   0  119.49    6.80
   7   9   0   28.40    2.90
   7   9   0   32.40    3.30
   7   9   0   20.00    3.40
  -7  -9   0   22.20    3.00
   7   8   0  184.08    8.90
   7   8   0  184.18    9.70
   7   8   0  170.98    9.60
   7   8   0  181.18    8.90
  -7  -8   0  182.18    9.00
   7   7   0    3.90    2.20
   7   7   0    2.20    1.40
   7   7   0    2.40    1.80
   7   7   0    2.80    1.70
  -7  -7   0    2.40    1.90
   7   6   0  406.16   20.10
   7   6   0  403.66   17.60
   7   6   0  395.66   18.70
   7   6   0  409.06   17.70
  -7  -6   0  390.56   17.70
   7   5   0   82.49    5.10
   7   5   0   79.39    4.50
   7   5   0   82.39    4.50
   7   5   0   80.29    4.50
  -7  -5   0   89.29    4.50
  -7  -5   0   81.39    4.60
  -7  -5   0   82.79    4.90
   7   4   0  658.73   27.10
   7   4   0  630.54   31.10
   7   4   0  616.14   27.10
   7   4   0  623.14   28.60
  -7  -4   0  629.24   27.10
  -7  -4   0  626.34   28.50
  -7  -4   0  648.64   27.00
   7   3   0  123.79    6.00
   7   3   0  125.69    6.70
   7   3   0  131.69    6.10
  -7  -3   0  128.69    6.10
  -7  -3   0  134.99    6.00
   7   2   0  928.81   45.20
   7   2   0  907.71   39.00
   7   2   0  923.71   39.00
   7   2   0  911.31   41.10
  -7  -2   0  933.11   38.90
  -7  -2   0  930.31   39.00
   7   1   0   97.39    4.80
   7   1   0  105.89    4.80
   7   1   0  101.89    5.50
   7   1   0   97.79    5.30
  -7  -1   0  105.99    4.70
  -7  -1   0   99.19    4.80
   7   0   0  682.63   28.50
   7   0   0  659.33   28.50
   7   0   0  679.63   33.30
  -7   0   0  695.03   28.50
  -7   0   0  653.03   28.50
   7  -1   0   98.19    4.70
   7  -1   0   96.89    5.70
   7  -1   0  109.69    4.70
  -7   1   0   99.59    4.70
  -7   1   0   95.19    5.60
  -7   1   0  106.79    4.70
   7  -2   0  908.91   39.10
   7  -2   0  947.01   39.20
   7  -2   0  920.01   46.00
  -7   2   0  906.51   39.10
  -7   2   0  960.30   39.10
   7  -3   0  126.79    6.00
   7  -3   0  130.59    5.90
   7  -3   0  121.49    7.40
  -7   3   0  124.19    5.90
  -7   3   0  126.99    7.20
  -7   3   0  142.19    5.90
   7  -4   0  619.24   27.00
   7  -4   0  620.54   32.00
   7  -4   0  652.83   27.00
  -7   4   0  653.73   31.90
  -7   4   0  614.44   27.00
  -7   4   0  651.93   27.00
   7  -5   0   89.69    4.40
   7  -5   0   82.59    4.30
   7  -5   0   84.49    5.80
  -7   5   0   84.19    5.60
  -7   5   0   85.99    4.30
  -7   5   0   80.79    4.40
   7  -6   0  400.76   21.10
   7  -6   0  395.56   17.60
   7  -6   0  417.96   17.60
  -7   6   0  403.76   17.60
  -7   6   0  404.66   17.60
   7  -7   0    5.40    1.60
   7  -7   0    3.60    2.70
   7  -7   0    4.00    1.60
  -7   7   0    3.80    1.70
   7  -8   0  179.88    8.50
   7  -8   0  175.08    8.50
   7  -8   0  179.28   10.80
  -7   8   0  176.78    8.60
   7  -9   0   27.20    2.80
   7  -9   0   22.40    2.10
   7  -9   0   32.30    3.10
   7  -9   0   26.90    4.20
  -7   9   0   29.40    3.00
   7 -10   0  104.19    5.90
   7 -10   0  115.19    6.20
  -7  10   0  102.89    6.20
   7 -11   0   12.70    2.50
  -7  11   0   13.70    2.80
   7 -12   0  109.99    6.40
   7 -13   0    9.80    2.80
   8  13   0   11.70    3.10
   8  13   0   13.80    3.20
   8  13   0   10.10    3.80
  -8 -13   0   11.90    3.30
   8  12   0   15.80    3.00
   8  12   0    5.10    2.80
   8  12   0   10.00    3.50
  -8 -12   0   13.00    3.20
   8  11   0   21.60    3.30
   8  11   0   25.60    3.50
   8  11   0   20.00    3.80
  -8 -11   0   29.80    3.80
   8  10   0   10.80    2.80
   8  10   0    8.70    3.00
  -8 -10   0    9.50    2.80
   8   9   0   12.80    2.70
   8   9   0   18.40    3.30
   8   9   0   17.90    2.30
  -8  -9   0   15.10    2.80
   8   8   0   32.60    3.70
   8   8   0   23.70    2.90
   8   8   0   32.80    3.20
   8   8   0   29.50    2.70
  -8  -8   0   28.40    3.00
   8   7   0   79.59    4.60
   8   7   0   74.99    4.70
   8   7   0   71.39    5.20
   8   7   0   71.99    4.30
  -8  -7   0   62.59    4.60
   8   6   0    2.50    2.10
   8   6   0    5.70    1.20
   8   6   0    6.00    1.80
   8   6   0    4.60    1.80
  -8  -6   0    4.10    1.80
   8   5   0   79.99    4.30
   8   5   0   77.69    5.20
   8   5   0   75.29    4.40
   8   5   0   79.59    4.40
  -8  -5   0   78.89    4.50
   8   4   0   91.69    4.70
   8   4   0   86.49    5.40
   8   4   0   92.99    4.80
  -8  -4   0   94.19    4.60
  -8  -4   0   85.49    4.80
   8   3   0  139.69    6.80
   8   3   0  152.88    6.80
   8   3   0  148.99    7.60
  -8  -3   0  141.29    6.80
  -8  -3   0  148.99    6.80
   8   2   0   29.60    1.90
   8   2   0   32.10    2.20
   8   2   0   34.20    3.10
  -8  -2   0   22.00    2.00
  -8  -2   0   29.60    2.20
   8   1   0   37.90    2.20
   8   1   0   32.70    2.30
   8   1   0   29.70    2.20
   8   1   0   40.00    3.20
  -8  -1   0   37.70    2.20
  -8  -1   0   28.30    2.20
   8   0   0   18.20    1.50
   8   0   0   20.70    1.70
   8   0   0   17.40    1.80
  -8   0   0   16.90    1.50
  -8   0   0   14.90    1.40
   8  -1   0   39.20    2.30
   8  -1   0   34.50    2.20
   8  -1   0   39.10    3.00
  -8   1   0   37.00    2.20
  -8   1   0   34.20    2.20
   8  -2   0   28.40    2.10
   8  -2   0   35.60    3.00
   8  -2   0   39.00    2.30
  -8   2   0   30.60    2.10
  -8   2   0   26.10    2.00
  -8   2   0   36.80    2.80
   8  -3   0  145.49    6.70
   8  -3   0  151.28    8.40
   8  -3   0  149.69    6.80
  -8   3   0  141.29    6.70
  -8   3   0  149.29    6.70
  -8   3   0  158.88    8.30
   8  -4   0   89.69    4.50
   8  -4   0   92.39    6.10
   8  -4   0  100.89    4.60
  -8   4   0   89.19    4.50
  -8   4   0   93.99    4.50
  -8   4   0   91.79    5.80
   8  -5   0   78.79    5.60
   8  -5   0   74.99    4.00
   8  -5   0   76.79    4.00
  -8   5   0   79.49    4.10
  -8   5   0   77.89    4.00
  -8   5   0   74.39    5.30
   8  -6   0    5.50    1.50
   8  -6   0    5.70    2.60
   8  -6   0    4.50    1.50
  -8   6   0    4.90    1.60
   8  -7   0   74.09    6.10
   8  -7   0   67.89    4.20
   8  -7   0   69.89    4.20
  -8   7   0   76.39    4.30
   8  -8   0   31.10    4.30
   8  -8   0   28.60    2.80
   8  -8   0   29.50    2.80
  -8   8   0   28.80    2.90
   8  -9   0   15.70    2.40
   8  -9   0   16.60    2.40
   8  -9   0   13.80    3.70
  -8   9   0   15.50    2.50
   8 -10   0    7.40    2.20
  -8  10   0    7.40    2.30
   8 -11   0   20.70    2.90
   8 -12   0   12.60    2.70
   8 -13   0   12.40    2.90
   9  12   0   37.30    4.20
   9  12   0   33.90    4.30
   9  12   0   26.70    4.70
  -9 -12   0   32.50    4.00
   9  11   0   43.50    4.90
   9  11   0   43.70    4.30
  -9 -11   0   46.40    4.40
   9  10   0   79.39    6.50
   9  10   0   84.99    5.60
  -9 -10   0   76.39    5.50
   9   9   0   76.89    6.10
   9   9   0   85.19    5.30
  -9  -9   0   76.19    5.30
   9   8   0   53.49    5.10
   9   8   0   58.69    4.30
   9   8   0   59.19    3.80
  -9  -8   0   62.09    4.40
   9   7   0  220.58   10.50
   9   7   0  224.28   10.50
   9   7   0  223.08   11.30
   9   7   0  213.48   11.40
  -9  -7   0  217.98   10.50
   9   6   0   46.10    3.40
   9   6   0   40.70    3.90
   9   6   0   47.70    3.60
  -9  -6   0   44.50    3.60
   9   5   0  420.16   19.00
   9   5   0  452.85   19.10
   9   5   0  435.96   20.30
  -9  -5   0  430.56   19.10
   9   4   0  122.49    5.80
   9   4   0  110.69    5.70
   9   4   0  110.29    6.50
  -9  -4   0  116.99    5.80
   9   3   0  295.37   13.90
   9   3   0  287.27   12.90
   9   3   0  288.77   12.90
  -9  -3   0  297.27   12.80
  -9  -3   0  289.57   12.90
   9   2   0   32.80    2.40
   9   2   0   36.00    2.40
   9   2   0   29.70    3.00
   9   2   0   31.50    2.10
  -9  -2   0   31.80    2.40
  -9  -2   0   36.70    2.40
   9   1   0  186.98    8.60
   9   1   0  193.18    9.80
   9   1   0  196.38    9.60
   9   1   0  189.38    8.60
  -9  -1   0  198.08    8.50
  -9  -1   0  185.18    8.60
   9   0   0   90.99    4.50
   9   0   0   88.29    5.30
   9   0   0   92.49    4.50
  -9   0   0   94.39    4.50
  -9   0   0   98.29    4.50
   9  -1   0  192.78   10.10
   9  -1   0  194.18    8.50
   9  -1   0  189.18    8.50
  -9   1   0  193.38    8.40
  -9   1   0  185.68    8.50
   9  -2   0   29.10    2.30
   9  -2   0   33.50    2.30
   9  -2   0   30.30    3.20
  -9   2   0   36.70    2.20
  -9   2   0   31.90    2.20
  -9   2   0   31.10    3.00
   9  -3   0  291.07   12.80
   9  -3   0  295.67   12.90
   9  -3   0  292.17   15.50
  -9   3   0  310.87   15.40
  -9   3   0  301.57   12.80
  -9   3   0  283.37   12.80
   9  -4   0  119.39    5.60
   9  -4   0  109.69    7.30
   9  -4   0  127.09    5.70
  -9   4   0  111.99    5.60
  -9   4   0  129.79    5.60
  -9   4   0  111.49    7.10
   9  -5   0  427.26   18.60
   9  -5   0  434.06   22.40
   9  -5   0  436.76   18.60
  -9   5   0  424.46   18.60
   9  -6   0   54.79    3.30
   9  -6   0   48.70    4.80
   9  -6   0   48.20    3.30
  -9   6   0   48.30    3.30
   9  -7   0  211.78    9.90
   9  -7   0  208.48    9.90
   9  -7   0  225.28   12.60
  -9   7   0  219.58   10.00
   9  -8   0   66.79    6.30
   9  -8   0   63.19    4.20
   9  -8   0   74.79    4.30
  -9   8   0   67.19    4.40
   9  -9   0   77.39    6.90
   9  -9   0   75.39    4.70
  -9   9   0   84.19    4.90
   9 -10   0   72.69    4.70
   9 -11   0   44.80    4.00
   9 -12   0   43.20    4.10
  10  12   0    4.20    2.80
  10  12   0    2.50    2.80
  10  12   0   -0.60    3.50
 -10 -12   0    2.10    2.80
  10  11   0   -0.30    2.40
  10  11   0   -2.20    3.00
 -10 -11   0    0.00    2.60
  10  10   0   -3.20    2.30
  10  10   0    1.70    3.00
 -10 -10   0    2.30    2.40
  10   9   0   -1.20    2.70
  10   9   0    1.70    2.20
 -10  -9   0   -0.50    2.20
  10   8   0    0.90    2.60
  10   8   0    2.00    2.10
 -10  -8   0    2.00    2.10
  10   7   0    0.70    1.90
  10   7   0    1.10    1.90
  10   7   0    1.70    2.50
 -10  -7   0   -0.10    1.90
  10   6   0   17.70    3.10
  10   6   0   18.50    2.40
  10   6   0   18.80    2.40
 -10  -6   0   14.50    2.40
  10   5   0    2.70    1.60
  10   5   0    4.00    2.40
  10   5   0    1.40    1.70
 -10  -5   0    1.30    1.70
  10   4   0  119.69    6.60
  10   4   0   91.09    5.40
  10   4   0  108.89    5.50
 -10  -4   0  105.09    5.60
  10   3   0   -0.70    1.30
  10   3   0    1.50    1.40
  10   3   0    2.20    2.10
 -10  -3   0   -0.20    1.40
  10   2   0   20.90    2.70
  10   2   0   24.30    2.20
  10   2   0   25.00    2.30
 -10  -2   0   26.60    2.20
 -10  -2   0   26.40    2.30
  10   1   0   24.60    2.10
  10   1   0   14.20    2.50
  10   1   0   15.10    1.70
  10   1   0   22.40    2.10
 -10  -1   0   14.10    1.70
 -10  -1   0   23.40    1.90
  10   0   0   81.19    4.80
  10   0   0   82.19    4.10
  10   0   0   76.09    4.00
  10   0   0   77.39    5.00
 -10   0   0   83.59    4.00
 -10   0   0   74.29    4.00
  10  -1   0   14.70    1.60
  10  -1   0   25.40    2.10
  10  -1   0   20.30    2.30
 -10   1   0   19.40    1.70
 -10   1   0   15.10    1.60
  10  -2   0   27.40    2.40
  10  -2   0   27.50    2.20
  10  -2   0   33.60    3.00
 -10   2   0   25.00    2.10
 -10   2   0   26.60    2.00
  10  -3   0    0.00    2.00
  10  -3   0   -0.80    1.10
  10  -3   0    0.30    1.30
 -10   3   0    1.70    1.70
 -10   3   0    1.00    1.00
 -10   3   0    0.40    1.20
  10  -4   0  113.39    7.10
  10  -4   0   92.99    5.30
  10  -4   0  108.29    5.30
 -10   4   0  126.49    7.00
 -10   4   0  105.69    5.20
 -10   4   0  117.09    5.30
  10  -5   0    1.60    1.30
  10  -5   0    5.30    1.50
  10  -5   0    1.20    2.50
 -10   5   0    2.90    1.40
  10  -6   0   18.30    2.00
  10  -6   0   20.60    3.50
  10  -6   0   16.10    2.00
 -10   6   0   20.50    2.10
  10  -7   0    2.10    2.90
  10  -7   0   -1.70    1.40
  10  -7   0    2.30    1.60
 -10   7   0   -0.10    1.60
  10  -8   0    2.70    3.10
  10  -8   0    4.20    1.70
  10  -9   0    2.90    1.80
  10 -10   0   -0.20    1.80
  10 -11   0   -0.40    2.00
  10 -12   0   -0.50    2.20
  11  11   0   57.19    6.00
  11  11   0   52.09    4.90
  11  10   0   42.60    4.70
  11  10   0   40.20    4.10
 -11 -10   0   35.40    4.00
  11   9   0   78.99    6.50
  11   9   0   83.69    5.70
 -11  -9   0   84.39    5.80
  11   8   0   65.39    5.70
  11   8   0   61.69    4.70
 -11  -8   0   56.19    4.60
  11   7   0   62.49    4.60
  11   7   0   65.29    5.70
 -11  -7   0   69.59    4.70
  11   6   0  103.49    5.50
  11   6   0   97.19    6.60
  11   6   0   87.49    5.30
 -11  -6   0   93.09    5.50
  11   5   0   96.99    6.80
  11   5   0  107.19    5.60
  11   5   0  103.49    5.60
 -11  -5   0  104.09    5.70
  11   4   0  153.58    8.10
  11   4   0  148.69    6.90
  11   4   0  124.19    6.80
 -11  -4   0  133.79    6.90
  11   3   0  222.98   11.20
  11   3   0  222.98   10.10
  11   3   0  213.18   10.00
 -11  -3   0  217.78   10.10
  11   2   0  121.99    6.90
  11   2   0  119.39    5.60
  11   2   0  101.19    5.50
 -11  -2   0  103.29    5.50
  11   1   0  207.88   10.70
  11   1   0  217.48    9.50
  11   1   0  201.38   10.80
  11   1   0  210.58    9.50
 -11  -1   0  208.78    9.40
  11   0   0  140.19    6.10
  11   0   0  132.19    7.10
  11   0   0  133.79    7.20
  11   0   0  105.19    5.90
 -11   0   0  118.19    5.90
 -11   0   0  129.39    6.00
  11  -1   0  191.98   11.10
  11  -1   0  202.18    9.40
  11  -1   0  212.28    9.30
 -11   1   0  222.68    9.30
 -11   1   0  209.38    9.30
  11  -2   0  126.09    6.90
  11  -2   0  106.09    5.30
  11  -2   0  122.09    5.60
 -11   2   0  101.29    5.30
 -11   2   0  105.99    5.30
  11  -3   0  225.98    9.70
  11  -3   0  212.18   12.00
  11  -3   0  218.78    9.90
 -11   3   0  211.08    9.60
  11  -4   0  138.59    6.60
  11  -4   0  152.18    8.70
  11  -4   0  130.69    6.60
 -11   4   0  142.09    6.60
  11  -5   0   96.89    7.20
  11  -5   0  103.69    5.20
  11  -5   0  107.29    5.20
 -11   5   0  102.99    5.20
  11  -6   0   94.79    5.00
  11  -6   0  103.49    7.20
  11  -6   0   88.99    5.10
 -11   6   0   94.39    5.00
  11  -7   0   64.29    3.90
  11  -7   0   57.19    6.10
  11  -8   0   47.60    3.60
  11  -8   0   58.29    6.00
  11  -9   0   74.99    4.60
  11 -10   0   41.70    3.60
  11 -11   0   45.80    4.10
  12  10   0    7.80    3.50
  12  10   0   14.60    3.10
  12   9   0   25.30    3.40
  12   9   0   22.90    3.90
  12   8   0   -0.30    2.10
  12   8   0    1.50    2.90
 -12  -8   0    0.00    2.20
  12   7   0    1.70    2.00
  12   7   0   -0.80    2.60
 -12  -7   0    0.90    2.00
  12   6   0   20.60    2.70
  12   6   0   19.80    3.40
 -12  -6   0   19.30    2.80
  12   5   0   61.09    5.50
  12   5   0   60.79    4.10
 -12  -5   0   66.29    4.30
  12   4   0   33.80    3.10
  12   4   0   37.10    3.30
  12   4   0   53.79    4.60
 -12  -4   0   39.20    3.40
  12   3   0    3.10    1.50
  12   3   0    2.70    2.30
  12   3   0    1.10    1.50
 -12  -3   0   -0.10    1.50
  12   2   0   -1.60    1.40
  12   2   0    0.60    2.40
  12   2   0    1.70    1.50
 -12  -2   0   -0.50    1.40
  12   1   0   72.09    4.20
  12   1   0   72.69    4.10
  12   1   0   71.09    4.40
  12   1   0   74.49    5.70
 -12  -1   0   81.29    4.10
  12   0   0    0.50    2.40
  12   0   0    1.30    1.30
  12   0   0    1.80    1.50
  12   0   0    1.20    1.50
 -12   0   0    2.10    1.30
  12  -1   0   78.19    4.10
  12  -1   0   72.09    5.10
  12  -1   0   79.39    4.30
 -12   1   0   73.79    4.00
  12  -2   0    0.10    1.30
  12  -2   0   -0.30    2.00
  12  -2   0    2.30    1.50
 -12   2   0   -0.30    1.10
  12  -3   0    1.80    1.50
  12  -3   0    1.30    2.20
  12  -3   0    2.50    1.30
 -12   3   0    0.90    1.20
  12  -4   0   39.80    2.80
  12  -4   0   44.40    4.30
  12  -4   0   38.00    2.80
 -12   4   0   35.90    2.70
  12  -5   0   65.49    5.70
  12  -5   0   63.69    3.80
  12  -6   0   25.80    4.00
  12  -6   0   21.90    2.30
  12  -7   0   -1.00    2.90
  12  -7   0   -0.30    1.60
  12  -8   0   -1.50    1.60
  12  -9   0   21.00    2.60
  12 -10   0    8.70    2.20
  13   9   0   10.80    3.60
  13   9   0   13.00    2.90
  13   8   0   70.29    5.20
  13   8   0   70.99    6.40
  13   7   0   16.50    3.50
  13   7   0   19.00    2.90
  13   6   0   45.70    4.70
  13   6   0   45.80    3.90
  13   5   0   19.80    2.50
  13   5   0   17.40    3.30
  13   4   0   66.19    5.80
  13   4   0   75.59    4.50
  13   3   0   20.20    2.40
  13   3   0   28.50    3.80
 -13  -3   0   21.60    2.50
  13   2   0  107.39    7.20
  13   2   0  111.29    5.60
 -13  -2   0  107.09    5.60
  13   1   0   36.80    2.90
  13   1   0   38.40    4.10
 -13  -1   0   39.70    2.90
  13   0   0   67.49    3.70
  13   0   0   56.49    5.30
  13   0   0   56.59    4.20
 -13   0   0   62.49    3.60
  13  -1   0   55.79    4.20
  13  -1   0   43.10    3.20
  13  -1   0   53.59    4.90
  13  -2   0  108.39    5.20
  13  -2   0   97.39    6.60
  13  -3   0   24.40    3.20
  13  -3   0   18.40    2.00
  13  -4   0   74.19    4.10
  13  -4   0   74.89    5.90
  13  -5   0   27.80    3.90
  13  -5   0   23.80    2.30
  13  -6   0   47.60    5.20
  13  -6   0   45.40    3.20
  13  -7   0   17.90    2.30
  13  -8   0   63.79    4.20
  13  -9   0   12.30    2.30
  14   8   0    1.70    2.30
  14   8   0    5.10    3.40
  14   7   0    5.80    2.40
  14   7   0    2.80    3.10
  14   6   0   18.90    3.80
  14   6   0   16.10    2.70
  14   5   0   13.10    2.30
  14   5   0   11.20    3.30
  14   4   0    8.70    3.20
  14   4   0   12.40    2.20
  14   3   0    0.30    1.60
  14   3   0   -1.10    2.60
  14   2   0   23.50    2.40
  14   2   0   26.50    4.10
  14   1   0   -0.10    2.70
  14   1   0    1.00    1.50
  14   0   0    1.70    2.70
  14   0   0    2.20    1.40
  14  -1   0    6.30    2.80
  14  -1   0    1.70    1.40
  14  -2   0   25.80    2.30
  14  -3   0    1.60    1.30
  14  -4   0   12.50    1.80
  14  -5   0   13.80    1.90
  14  -6   0   16.10    2.10
  14  -7   0    4.30    1.70
  14  -8   0    1.90    1.80
  15   7   0   17.00    2.90
  15   7   0   17.50    4.00
  15   6   0   -0.30    2.00
  15   6   0    0.60    3.10
  15   5   0   27.00    3.10
  15   5   0   32.90    4.60
  15   4   0    3.10    1.80
  15   4   0    3.60    3.00
  15   3   0   59.69    4.00
  15   3   0   62.39    6.00
  15   2   0    3.70    3.20
  15   2   0   -2.30    1.50
  15   1   0   37.50    4.40
  15   1   0   39.00    3.10
  15   0   0    0.20    2.80
  15   0   0   -0.60    1.40
  15  -1   0   42.60    4.60
  15  -1   0   39.40    3.00
  15  -2   0    4.80    3.00
  15  -2   0    1.80    1.40
  15  -3   0   63.89    3.80
  15  -4   0   -1.30    1.30
  15  -5   0   28.50    2.50
  15  -6   0    1.50    1.50
  15  -7   0   26.40    2.60
  16   5   0   25.20    3.00
  16   5   0   31.00    4.60
  16   4   0   30.50    3.10
  16   4   0   28.20    4.50
  16   3   0    1.40    1.70
  16   3   0    1.80    3.00
  16   2   0   22.70    4.30
  16   2   0   25.10    2.70
  16   1   0    6.80    1.70
  16   1   0    4.80    3.30
  16   0   0   65.69    4.00
  16   0   0   66.99    6.40
  16  -1   0    6.10    1.70
  16  -1   0    5.10    3.20
  16  -2   0   29.10    4.40
  16  -2   0   29.60    2.50
  16  -3   0    2.70    1.50
  16  -4   0   31.30    2.70
  16  -5   0   22.40    2.30
  17   1   0   -0.60    1.60
  17   1   0    5.50    3.70
  17   0   0    1.50    3.20
  17   0   0    0.90    1.50
  17  -1   0    1.30    1.50
  17  -1   0    0.30    3.10
  16  -4   1    3.10    1.50
  16  -3   1   -0.50    1.30
  16  -2   1    2.40    3.20
  16  -2   1    0.80    1.30
  16  -1   1    1.30    1.40
  16  -1   1   -1.80    2.90
  16   0   1    1.80    1.40
  16   0   1    2.60    3.10
  16   1   1   -2.80    3.00
  16   1   1    2.20    1.60
  16   2   1    0.90    1.60
  16   2   1    0.50    3.20
  16   3   1    1.30    1.80
  16   3   1    2.40    3.30
  16   4   1    3.00    1.80
  16   4   1    4.60    3.40
  15  -6   1    1.10    1.50
  15  -5   1   -0.60    1.40
  15  -4   1    0.60    1.30
  15  -3   1   -2.00    2.50
  15  -3   1    1.20    1.30
  15  -2   1    2.80    2.90
  15  -2   1    1.30    1.30
  15  -1   1    1.70    1.40
  15  -1   1    0.80    2.90
  15   0   1   -0.20    1.40
  15   0   1    1.50    2.90
  15   1   1   -1.80    2.70
  15   1   1    1.60    1.50
  15   2   1    0.60    1.50
  15   2   1   -2.50    2.90
  15   3   1    0.10    1.60
  15   3   1   -1.70    2.70
  15   4   1    0.20    2.90
  15   4   1    2.60    1.80
  15   5   1   -1.80    1.70
  15   5   1    5.30    3.20
  15   6   1    1.20    3.30
  15   6   1    0.80    2.10
  14  -8   1   -2.10    1.60
  14  -7   1    1.70    1.50
  14  -6   1    1.60    1.40
  14  -6   1   -3.30    2.90
  14  -5   1    3.30    2.90
  14  -5   1    1.10    1.40
  14  -4   1   -1.70    2.40
  14  -4   1   -0.80    1.20
  14  -3   1   -0.50    1.30
  14  -3   1   -0.90    2.30
  14  -2   1   -1.50    2.00
  14  -2   1   -0.10    1.30
  14  -1   1    1.40    2.70
  14  -1   1    0.80    1.30
  14  -1   1    1.00    2.00
  14   0   1    0.70    2.60
  14   0   1    0.00    1.70
  14   0   1    1.10    1.40
  14   1   1    0.80    1.40
  14   1   1    1.70    2.80
  14   2   1    1.00    1.50
  14   2   1    1.10    2.90
  14   3   1    2.10    2.80
  14   3   1    0.30    1.50
  14   4   1    0.10    1.70
  14   4   1   -1.20    2.80
  14   5   1    0.40    3.00
  14   5   1    1.50    1.90
  14   6   1   -0.60    3.00
  14   6   1   -0.70    2.00
  14   7   1    4.50    3.20
  14   7   1   -0.40    2.10
  14   8   1   -0.50    3.10
  14   8   1   -1.00    2.20
  13  -9   1    8.60    2.10
  13  -8   1    2.20    1.70
  13  -7   1    2.30    1.60
  13  -7   1    3.50    3.20
  13  -6   1    2.10    2.90
  13  -6   1   -0.30    1.40
  13  -5   1    8.20    1.60
  13  -5   1   11.30    3.10
  13  -4   1    2.40    2.50
  13  -4   1    3.50    1.40
  13  -3   1    2.00    1.20
  13  -3   1    0.30    2.30
  13  -2   1    1.10    1.30
  13  -2   1    0.10    2.10
  13  -1   1    0.20    1.20
  13  -1   1    1.10    1.90
  13  -1   1    2.60    2.50
  13   0   1    2.30    1.30
  13   0   1    2.80    2.40
  13   0   1   -0.60    1.60
  13   1   1    1.20    1.40
  13   1   1    1.10    2.50
  13   1   1    2.20    1.40
  13   2   1    2.20    2.70
  13   2   1    2.30    1.40
  13   3   1    2.40    2.70
  13   3   1    3.20    1.60
  13   4   1    1.10    1.60
  13   4   1    3.40    2.70
  13   5   1    7.70    3.10
  13   5   1    6.10    2.00
  13   6   1    2.50    1.90
  13   6   1    2.40    2.80
  13   7   1    2.20    2.10
  13   7   1    7.90    3.30
  13   8   1    1.80    2.20
  13   8   1   -0.10    3.00
  13   9   1   12.70    3.60
  13   9   1    9.30    2.70
  12 -10   1   -1.20    1.80
  12  -9   1    1.40    1.80
  12  -8   1    0.40    3.20
  12  -8   1    0.80    1.60
  12  -7   1   -0.10    1.50
  12  -7   1    0.80    2.90
  12  -6   1   -1.40    1.40
  12  -6   1    0.70    2.80
  12  -5   1    4.30    1.40
  12  -5   1    5.50    2.80
  12  -4   1    1.50    1.30
  12  -4   1    1.20    1.10
  12  -4   1    3.30    2.50
 -12   3  -1    0.40    1.10
  12  -3   1    0.20    1.20
  12  -3   1   -0.30    2.20
 -12   2  -1   -0.30    1.10
  12  -2   1    0.10    1.40
  12  -2   1   -0.20    2.00
  12  -2   1   -0.40    1.20
 -12   1  -1    0.60    1.10
  12  -1   1   -0.40    1.30
  12  -1   1   -0.20    1.80
  12  -1   1    0.50    1.20
 -12   0  -1   -0.40    1.10
  12   0   1    0.30    1.20
  12   0   1   -0.70    2.20
  12   0   1    0.80    1.40
  12   0   1    0.00    1.60
 -12  -1  -1    1.40    1.30
  12   1   1   -1.80    2.30
  12   1   1    0.50    1.40
  12   1   1   -0.80    1.20
  12   1   1   -0.70    1.40
 -12  -2  -1    1.10    1.40
  12   2   1    0.60    1.40
  12   2   1   -0.80    1.10
  12   2   1   -1.70    1.40
  12   2   1    0.00    2.40
 -12  -3  -1    1.80    1.60
  12   3   1    0.00    1.50
  12   3   1   -1.50    1.40
  12   3   1   -2.20    2.20
 -12  -4  -1    2.90    1.70
  12   4   1    0.80    2.50
  12   4   1    0.70    1.80
  12   4   1   -0.20    1.60
 -12  -5  -1    2.10    1.80
  12   5   1    3.60    1.80
  12   5   1    3.70    2.60
 -12  -6  -1   -0.50    1.90
  12   6   1    0.20    2.60
  12   6   1   -2.30    1.80
 -12  -7  -1    2.80    2.10
  12   7   1    1.00    2.00
  12   7   1    2.50    3.00
  12   8   1    0.50    2.90
  12   8   1    4.60    2.30
  12   9   1    3.20    2.50
  12   9   1    3.40    3.10
  12  10   1    0.30    3.20
  12  10   1   -0.60    2.40
  11 -11   1   -0.80    1.90
  11 -10   1    3.60    1.90
  11  -9   1    2.40    1.80
  11  -9   1   -2.80    3.20
  11  -8   1    2.70    3.00
  11  -8   1    0.60    1.50
  11  -7   1    4.10    1.60
  11  -7   1    1.30    2.90
  11  -6   1    9.70    3.10
  11  -6   1    3.10    1.50
 -11   5  -1    2.60    1.30
  11  -5   1    9.50    2.90
  11  -5   1    1.00    1.30
  11  -5   1    3.30    1.30
 -11   4  -1    5.90    1.30
  11  -4   1    3.20    1.20
  11  -4   1    7.80    2.60
  11  -4   1    5.60    1.40
 -11   3  -1    2.30    1.10
 -11   3  -1    1.30    1.10
  11  -3   1    0.10    1.20
  11  -3   1    2.50    2.20
 -11   2  -1    3.60    1.10
 -11   2  -1    3.00    1.10
  11  -2   1    1.60    1.40
  11  -2   1    3.20    1.20
  11  -2   1    1.10    2.00
 -11   1  -1    0.10    1.10
 -11   1  -1    1.60    1.10
  11  -1   1    0.30    1.20
  11  -1   1    1.60    1.30
  11  -1   1    0.90    1.80
 -11   0  -1    3.10    1.20
 -11   0  -1    1.50    1.20
  11   0   1   -0.40    1.50
  11   0   1    1.90    1.20
  11   0   1    1.90    1.40
  11   0   1    4.20    2.30
 -11  -1  -1    0.50    1.20
  11   1   1    3.70    1.40
  11   1   1    0.70    2.20
  11   1   1    1.00    1.20
  11   1   1    0.40    1.40
 -11  -2  -1    1.90    1.40
  11   2   1    3.00    1.40
  11   2   1    2.30    1.20
  11   2   1    2.80    1.50
  11   2   1    5.00    2.40
 -11  -3  -1    0.80    1.50
  11   3   1    1.90    1.50
  11   3   1    0.20    2.30
  11   3   1    2.70    1.50
 -11  -4  -1    3.60    1.80
  11   4   1    9.20    2.70
  11   4   1    5.60    1.80
  11   4   1    2.60    1.70
 -11  -5  -1    2.60    1.80
  11   5   1    5.60    1.80
  11   5   1    4.50    2.50
  11   5   1    4.70    1.80
 -11  -6  -1    4.20    2.00
  11   6   1    4.20    1.90
  11   6   1    8.70    2.90
  11   6   1    6.70    2.00
 -11  -7  -1    4.80    2.10
  11   7   1    0.90    1.90
  11   7   1    8.50    2.90
 -11  -8  -1   -0.10    2.10
  11   8   1    2.60    2.80
  11   8   1    2.30    2.10
 -11  -9  -1    3.40    2.40
  11   9   1    4.50    2.50
  11   9   1    4.00    3.00
 -11 -10  -1    3.60    2.80
  11  10   1    0.60    3.10
  11  10   1    1.50    2.40
  11  11   1    2.30    2.60
  11  11   1   -0.50    3.40
  10 -11   1   -1.00    2.00
  10 -10   1    1.50    1.80
  10  -9   1   -2.10    3.10
  10  -9   1    2.70    1.80
  10  -8   1    4.60    3.20
  10  -8   1    3.10    1.60
 -10   7  -1   -0.20    1.50
  10  -7   1    0.50    1.40
  10  -7   1    0.70    1.40
  10  -7   1   -1.80    2.70
 -10   6  -1    0.30    1.40
  10  -6   1    0.40    1.40
  10  -6   1    1.10    2.70
  10  -6   1    0.50    1.40
 -10   5  -1   -0.60    1.30
  10  -5   1   -0.90    1.30
  10  -5   1    0.10    1.20
  10  -5   1   -0.80    2.40
 -10   4  -1    1.80    1.20
 -10   4  -1   -1.70    1.90
 -10   4  -1    1.60    1.10
  10  -4   1    4.10    1.30
  10  -4   1    0.50    1.10
  10  -4   1   -0.20    2.20
 -10   3  -1    1.10    1.00
 -10   3  -1    1.10    1.00
  10  -3   1   -0.60    1.10
  10  -3   1    0.40    2.10
 -10   2  -1    3.80    1.00
 -10   2  -1    3.10    1.10
  10  -2   1    5.80    1.20
  10  -2   1    3.50    1.30
  10  -2   1    3.10    1.90
 -10   1  -1    1.20    1.00
 -10   1  -1   -0.70    1.00
  10  -1   1    1.90    1.20
  10  -1   1    1.10    1.10
  10  -1   1   -0.80    1.60
 -10   0  -1    0.20    1.00
 -10   0  -1    0.60    1.00
  10   0   1    0.00    1.20
  10   0   1   -1.40    1.40
  10   0   1   -0.40    1.10
  10   0   1    1.00    2.00
 -10  -1  -1    0.20    1.10
 -10  -1  -1    1.30    1.10
  10   1   1    2.40    2.10
  10   1   1    0.20    1.10
  10   1   1    0.30    1.10
  10   1   1    1.30    1.20
 -10  -2  -1    4.30    1.30
 -10  -2  -1    3.80    1.30
  10   2   1    6.60    2.30
  10   2   1    5.20    1.10
  10   2   1    3.60    1.40
  10   2   1    3.10    1.30
 -10  -3  -1    0.30    1.30
  10   3   1    1.30    2.10
  10   3   1    0.10    1.30
  10   3   1   -0.20    1.30
 -10  -4  -1    0.90    1.60
  10   4   1    4.60    2.40
  10   4   1    2.00    1.50
  10   4   1   -0.80    1.40
 -10  -5  -1   -0.10    1.70
  10   5   1    1.70    2.30
  10   5   1    3.50    1.70
  10   5   1    1.80    1.70
 -10  -6  -1    2.60    1.80
  10   6   1    3.00    1.80
  10   6   1    0.40    2.40
  10   6   1    0.30    1.70
 -10  -7  -1   -0.70    1.80
  10   7   1   -3.00    1.70
  10   7   1    1.30    1.10
  10   7   1   -1.50    1.70
  10   7   1    0.80    2.50
 -10  -8  -1    6.30    2.30
  10   8   1    6.80    2.30
  10   8   1    3.60    2.10
  10   8   1    2.60    2.70
 -10  -9  -1    2.30    2.20
  10   9   1    1.20    2.20
  10   9   1    3.60    2.90
 -10 -10  -1    1.70    2.40
  10  10   1   -0.90    2.30
  10  10   1   -1.20    2.90
 -10 -11  -1   -0.90    2.50
  10  11   1   -0.90    2.40
  10  11   1   -3.50    3.10
  10  11   1    1.50    2.60
   9 -12   1    2.50    2.20
   9 -11   1    0.20    2.00
   9 -10   1   10.00    3.70
   9 -10   1    5.20    2.10
   9  -9   1    2.20    1.70
   9  -9   1    3.50    3.20
  -9   8  -1    4.30    1.90
   9  -8   1    2.30    1.60
   9  -8   1    3.50    1.70
   9  -8   1    4.30    3.00
  -9   7  -1    7.70    1.80
   9  -7   1    6.00    3.00
   9  -7   1    7.80    1.70
   9  -7   1    6.90    1.70
  -9   6  -1    8.60    1.60
   9  -6   1    7.70    2.80
   9  -6   1    5.60    1.50
   9  -6   1    8.30    1.60
  -9   5  -1   14.10    1.70
  -9   5  -1   15.90    1.60
   9  -5   1   12.30    1.60
   9  -5   1   14.70    2.90
   9  -5   1   14.70    1.70
  -9   4  -1    3.90    2.00
  -9   4  -1    5.10    1.20
  -9   4  -1    5.10    1.10
   9  -4   1    7.30    2.30
   9  -4   1    4.00    1.20
   9  -4   1    4.20    1.20
  -9   3  -1    0.30    1.70
  -9   3  -1    2.80    0.90
  -9   3  -1    2.10    1.00
   9  -3   1    1.40    1.00
   9  -3   1   -0.10    1.90
  -9   2  -1   -0.20    0.80
  -9   2  -1    0.20    0.90
   9  -2   1    1.40    1.10
   9  -2   1    0.40    1.60
   9  -2   1    0.10    0.90
  -9   1  -1    1.30    0.90
  -9   1  -1    1.90    1.00
   9  -1   1    1.60    1.00
   9  -1   1    2.80    1.50
   9  -1   1    2.10    1.10
  -9   0  -1   -0.70    0.90
  -9   0  -1    0.40    0.90
   9   0   1    0.50    1.50
   9   0   1    1.10    1.00
   9   0   1    0.30    1.20
   9   0   1    0.80    1.00
  -9  -1  -1    0.50    1.00
  -9  -1  -1    0.80    1.10
   9   1   1    4.00    1.10
   9   1   1    4.00    1.80
   9   1   1    1.40    1.10
   9   1   1    1.70    1.00
  -9  -2  -1    0.70    1.10
  -9  -2  -1    0.10    1.00
   9   2   1    0.20    1.10
   9   2   1    1.70    1.90
   9   2   1    2.60    1.20
   9   2   1    1.20    0.90
  -9  -3  -1    2.80    1.30
  -9  -3  -1    3.00    1.20
   9   3   1    2.90    1.30
   9   3   1    2.50    1.90
   9   3   1    0.80    1.30
  -9  -4  -1    5.20    1.60
   9   4   1    3.30    1.50
   9   4   1    7.90    2.20
   9   4   1    5.80    1.60
  -9  -5  -1   12.40    2.10
   9   5   1   15.60    1.60
   9   5   1   16.40    2.80
   9   5   1   10.90    2.00
   9   5   1   15.90    2.10
  -9  -6  -1    8.10    2.00
   9   6   1    6.10    1.90
   9   6   1    9.40    1.30
   9   6   1    8.70    2.40
   9   6   1    9.00    2.00
  -9  -7  -1    6.80    2.00
   9   7   1    5.80    1.40
   9   7   1    8.60    2.20
   9   7   1    6.40    2.10
   9   7   1    9.20    2.70
  -9  -8  -1    2.80    2.10
   9   8   1    3.10    2.10
   9   8   1    6.60    2.50
   9   8   1    5.10    1.50
   9   8   1    8.70    2.10
  -9  -9  -1   -0.10    2.10
   9   9   1    5.20    2.30
   9   9   1    0.20    2.60
  -9 -10  -1   14.80    2.90
   9  10   1   12.60    3.40
   9  10   1    7.20    2.60
  -9 -11  -1    1.40    2.40
   9  11   1   -2.10    2.90
   9  11   1    2.00    2.50
   9  11   1    0.60    2.40
  -9 -12  -1    3.10    2.70
   9  12   1   -1.20    3.30
   9  12   1    0.90    2.60
   9  12   1    4.50    2.70
   8 -13   1   -2.60    2.20
   8 -12   1    4.30    2.30
   8 -11   1   -1.70    1.90
  -8  10  -1    1.90    2.00
   8 -10   1    4.30    3.40
   8 -10   1    4.80    2.00
  -8   9  -1   -1.50    1.80
   8  -9   1    2.10    2.00
   8  -9   1    0.70    1.70
   8  -9   1    1.20    3.00
  -8   8  -1    2.90    1.80
   8  -8   1    9.20    3.10
   8  -8   1    3.80    1.70
   8  -8   1    5.90    1.80
  -8   7  -1    1.80    1.50
   8  -7   1    3.00    1.50
   8  -7   1   -2.90    2.50
   8  -7   1   -1.40    1.40
  -8   6  -1    5.80    1.50
   8  -6   1    1.30    2.40
   8  -6   1    3.80    1.40
   8  -6   1    0.70    1.30
  -8   5  -1    0.10    1.80
  -8   5  -1   -0.50    1.20
  -8   5  -1    0.40    1.00
   8  -5   1    2.20    2.20
   8  -5   1    1.00    1.20
   8  -5   1    1.00    1.10
  -8   4  -1    8.50    1.30
  -8   4  -1    7.40    1.90
  -8   4  -1    6.00    1.10
   8  -4   1    5.70    1.30
   8  -4   1    9.20    1.20
   8  -4   1    8.20    2.20
  -8   3  -1    2.60    0.90
  -8   3  -1    1.20    1.50
  -8   3  -1    2.60    1.00
   8  -3   1    3.90    1.00
   8  -3   1    4.70    1.90
  -8   2  -1    5.90    1.00
  -8   2  -1    4.40    0.90
   8  -2   1    6.10    1.00
   8  -2   1    4.20    1.70
   8  -2   1    4.20    1.10
  -8   1  -1    0.00    0.80
  -8   1  -1   -0.10    0.80
   8  -1   1    1.00    0.90
   8  -1   1    0.70    0.90
   8  -1   1    0.50    1.30
  -8   0  -1   -0.60    0.80
  -8   0  -1   -0.50    0.80
   8   0   1    1.10    0.90
   8   0   1    1.10    0.90
   8   0   1    0.10    1.10
  -8  -1  -1   -0.50    0.90
  -8  -1  -1    0.00    0.90
   8   1   1   -0.40    0.90
   8   1   1   -0.30    0.90
   8   1   1    1.20    1.60
   8   1   1    0.80    0.90
  -8  -2  -1    4.30    1.20
  -8  -2  -1    4.70    1.10
   8   2   1    2.50    1.10
   8   2   1    3.70    1.20
   8   2   1    4.50    1.80
   8   2   1    3.40    0.90
  -8  -3  -1    2.00    1.20
  -8  -3  -1    1.10    1.10
   8   3   1    2.40    1.30
   8   3   1    1.80    1.20
   8   3   1    1.80    1.60
  -8  -4  -1    7.60    1.40
  -8  -4  -1    6.70    1.60
   8   4   1    4.60    2.00
   8   4   1    8.30    1.60
   8   4   1    8.50    1.50
  -8  -5  -1    1.90    1.60
   8   5   1    1.70    1.90
   8   5   1   -0.50    1.50
   8   5   1   -0.10    0.90
   8   5   1    0.90    1.40
  -8  -6  -1    5.20    1.80
   8   6   1    3.60    1.70
   8   6   1   -0.40    2.00
   8   6   1    4.80    1.30
   8   6   1    4.90    1.70
  -8  -7  -1    1.20    1.90
   8   7   1    0.30    1.30
   8   7   1    7.10    1.90
   8   7   1    2.70    1.80
   8   7   1    0.80    2.30
  -8  -8  -1    2.70    2.20
   8   8   1    0.20    2.00
   8   8   1   12.30    2.80
   8   8   1    3.90    1.90
   8   8   1    7.50    1.70
  -8  -9  -1    0.30    2.10
   8   9   1    0.20    2.50
   8   9   1    0.00    1.50
   8   9   1   -0.70    2.00
  -8 -10  -1    3.00    2.30
   8  10   1    2.80    2.40
   8  10   1    0.20    2.70
  -8 -11  -1    4.40    2.60
   8  11   1    4.90    2.40
   8  11   1    0.70    3.00
   8  11   1    2.40    2.40
  -8 -12  -1    5.90    2.80
   8  12   1    2.00    2.60
   8  12   1    2.70    2.60
   8  12   1    3.30    3.40
  -8 -13  -1   -1.60    2.70
   8  13   1   -1.40    2.50
   8  13   1   -0.70    3.40
   7 -13   1   -0.10    2.20
   7 -12   1    0.80    2.20
  -7  11  -1    7.40    2.50
   7 -11   1    4.50    2.10
  -7  10  -1    1.70    2.00
   7 -10   1    4.00    3.30
   7 -10   1    0.40    1.80
  -7   9  -1   11.80    2.30
   7  -9   1    9.30    3.30
   7  -9   1   11.50    2.10
   7  -9   1    8.80    2.10
  -7   8  -1    5.00    1.90
   7  -8   1    4.90    2.90
   7  -8   1    2.50    1.70
   7  -8   1    4.30    1.80
  -7   7  -1    3.90    1.60
   7  -7   1    2.40    1.50
   7  -7   1    0.20    1.40
   7  -7   1    3.30    2.60
  -7   6  -1    8.60    1.60
  -7   6  -1    9.10    1.50
   7  -6   1    9.50    1.60
   7  -6   1    9.30    2.60
   7  -6   1   10.30    1.60
  -7   5  -1    4.10    1.10
  -7   5  -1    2.90    1.30
  -7   5  -1    2.90    1.70
   7  -5   1    5.10    1.30
   7  -5   1    3.30    1.20
   7  -5   1    3.60    2.10
  -7   4  -1   13.60    2.20
  -7   4  -1   20.10    1.70
  -7   4  -1   20.20    1.70
   7  -4   1   19.60    1.80
   7  -4   1   16.40    2.60
   7  -4   1   20.20    1.70
  -7   3  -1   36.10    2.20
  -7   3  -1   38.50    3.20
  -7   3  -1   37.50    2.30
   7  -3   1   38.70    3.40
   7  -3   1   40.70    2.30
  -7   2  -1    1.50    0.80
  -7   2  -1   -1.90    1.10
  -7   2  -1    3.30    0.80
   7  -2   1    2.50    1.00
   7  -2   1    3.20    0.90
   7  -2   1    2.80    1.50
  -7   1  -1    7.60    1.00
  -7   1  -1    6.60    0.80
   7  -1   1    8.50    1.10
   7  -1   1    9.10    1.10
   7  -1   1    6.10    1.50
  -7   0  -1   -0.10    0.80
  -7   0  -1    2.50    0.80
   7   0   1    0.20    0.90
   7   0   1    0.20    1.00
   7   0   1    0.40    0.90
  -7  -1  -1   10.10    1.20
  -7  -1  -1    8.60    1.20
   7   1   1    8.60    1.20
   7   1   1   10.70    1.90
   7   1   1    9.20    1.20
   7   1   1    9.80    1.20
  -7  -2  -1    3.20    1.00
  -7  -2  -1    1.60    1.00
   7   2   1    1.80    0.80
   7   2   1    1.20    1.00
   7   2   1    3.10    1.50
   7   2   1    0.80    1.00
  -7  -3  -1   37.70    2.60
  -7  -3  -1   36.20    2.40
   7   3   1   40.20    2.50
   7   3   1   43.10    3.30
   7   3   1   38.20    2.60
  -7  -4  -1   20.30    2.00
  -7  -4  -1   19.80    1.90
  -7  -4  -1   18.90    2.10
   7   4   1   16.40    2.20
   7   4   1   20.90    1.90
   7   4   1   16.80    1.90
  -7  -5  -1    3.10    1.60
  -7  -5  -1    0.30    1.40
  -7  -5  -1    1.40    1.40
   7   5   1    0.10    1.40
   7   5   1    4.90    1.40
   7   5   1    2.50    1.10
   7   5   1    2.60    1.90
  -7  -6  -1    7.80    2.00
   7   6   1   12.60    1.90
   7   6   1   11.10    2.30
   7   6   1    7.00    1.80
   7   6   1    9.40    1.60
  -7  -7  -1    1.70    1.80
   7   7   1    3.00    1.40
   7   7   1    2.40    1.70
   7   7   1    3.90    2.20
   7   7   1    2.40    1.70
  -7  -8  -1    4.80    2.30
   7   8   1    0.90    2.40
   7   8   1    2.80    1.70
   7   8   1    3.50    1.90
   7   8   1    3.90    2.00
  -7  -9  -1   11.20    2.60
   7   9   1   10.20    2.50
   7   9   1   16.30    3.10
   7   9   1   13.40    2.20
  -7 -10  -1    2.20    2.30
   7  10   1    2.40    2.80
   7  10   1    2.70    2.30
   7  10   1    1.30    1.80
   7  10   1    2.70    2.20
  -7 -11  -1    9.40    2.70
   7  11   1    3.90    2.60
   7  11   1    8.40    3.10
   7  11   1    6.90    2.50
  -7 -12  -1    3.90    2.70
   7  12   1    6.70    2.60
   7  12   1    2.00    3.10
   7  12   1    0.90    2.50
  -7 -13  -1    3.10    2.60
   7  13   1   -2.30    3.30
   7  13   1    5.20    2.90
   7  13   1    4.30    2.60
   6 -13   1    3.70    2.50
  -6  12  -1    1.40    2.40
   6 -12   1    0.20    2.20
  -6  11  -1    8.00    2.50
   6 -11   1    4.70    2.20
  -6  10  -1   13.50    2.60
   6 -10   1   15.10    2.40
   6 -10   1   18.80    2.70
   6 -10   1   18.00    3.90
  -6   9  -1    5.60    2.00
   6  -9   1    0.90    1.70
   6  -9   1    4.40    2.90
   6  -9   1   -1.00    1.70
  -6   8  -1    7.50    2.00
   6  -8   1    3.60    1.70
   6  -8   1    7.80    1.80
   6  -8   1   10.90    3.00
   6  -7   1   25.00    3.20
   6  -7   1   10.40    1.90
   6  -7   1   14.40    1.90
  -6   6  -1    5.60    1.50
  -6   6  -1    2.40    1.20
   6  -6   1    8.90    2.40
   6  -6   1    2.70    1.40
   6  -6   1    7.70    2.00
   6  -6   1    1.80    1.30
  -6   5  -1   12.40    2.00
  -6   5  -1    4.40    1.10
   6  -5   1    0.20    1.10
  -6   4  -1    1.30    1.00
  -6   4  -1    1.20    0.90
  -6   4  -1   -0.20    1.40
   6  -4   1    1.00    1.70
   6  -4   1   -0.50    0.80
   6  -4   1    0.80    1.00
  -6   3  -1    2.80    1.00
  -6   3  -1    3.20    1.40
  -6   3  -1    2.70    0.90
   6  -3   1    3.50    0.90
   6  -3   1    6.40    1.70
   6  -3   1    3.80    1.00
  -6   2  -1    6.10    0.90
   6  -2   1    6.50    1.10
   6  -2   1    5.50    0.90
   6  -2   1    5.40    1.50
  -6   1  -1   10.90    1.10
  -6   1  -1   14.20    1.20
   6  -1   1   11.90    1.10
   6  -1   1   12.10    1.10
   6  -1   1   13.80    1.70
  -6   0  -1    0.10    0.70
  -6   0  -1    0.60    0.70
   6   0   1   -1.10    0.70
   6   0   1    1.00    0.70
   6   0   1    0.80    1.00
  -6  -1  -1    9.30    1.10
   6   1   1    9.50    1.10
   6   1   1    9.20    1.70
   6   1   1   10.60    1.20
   6   1   1   10.60    1.20
  -6  -2  -1    4.60    1.00
  -6  -2  -1    3.60    1.10
   6   2   1    5.70    1.10
   6   2   1    3.60    1.10
  -6  -3  -1    4.40    1.10
  -6  -3  -1    1.80    1.20
  -6  -3  -1    5.80    1.40
   6   3   1    6.20    1.60
   6   3   1    1.40    1.10
   6   3   1    2.60    1.20
  -6  -4  -1    1.90    1.10
  -6  -4  -1   -1.00    1.20
  -6  -4  -1    0.50    1.30
   6   4   1    2.10    1.10
   6   4   1    1.60    1.20
   6   4   1   -0.20    1.50
  -6  -5  -1    2.50    1.30
  -6  -5  -1    6.90    1.60
   6   5   1    4.60    1.50
   6   5   1    8.90    1.50
  -6  -6  -1    7.70    1.90
  -6  -6  -1    2.40    1.60
   6   6   1    4.70    1.30
   6   6   1    3.60    1.50
   6   6   1    0.60    1.50
   6   6   1    7.70    2.00
  -6  -7  -1   10.40    2.10
   6   7   1   19.70    2.30
   6   7   1    8.60    1.90
  -6  -8  -1    5.60    2.20
   6   8   1    9.40    2.00
   6   8   1    7.50    2.50
   6   8   1    4.40    2.00
   6   8   1    4.90    2.20
  -6  -9  -1    1.20    2.20
   6   9   1    1.50    2.10
   6   9   1    4.40    2.50
   6   9   1    1.50    1.80
  -6 -10  -1   20.70    3.20
   6  10   1   14.80    3.30
   6  10   1   19.70    2.90
   6  10   1   13.40    2.50
   6  10   1   17.80    3.00
  -6 -11  -1    5.80    2.50
   6  11   1    8.70    3.00
   6  11   1    5.60    2.50
   6  11   1    6.80    2.30
  -6 -12  -1    1.70    2.40
   6  12   1    2.00    2.20
   6  12   1   -0.90    2.50
   6  12   1    3.00    3.10
  -6 -13  -1    5.50    2.90
   6  13   1    0.50    2.90
   6  13   1   -1.30    3.10
   5 -14   1    4.00    2.50
   5 -13   1    1.20    2.40
   5 -12   1    2.30    2.20
   5 -11   1    3.00    2.10
   5 -11   1    9.00    2.30
   5 -10   1    4.60    2.00
   5 -10   1    0.20    1.90
   5 -10   1    5.90    3.10
   5  -9   1    1.30    1.70
   5  -9   1    0.90    2.60
   5  -9   1    1.00    1.80
   5  -8   1    9.30    1.90
   5  -8   1   13.90    3.00
   5  -8   1   11.20    1.90
   5  -7   1    1.10    1.40
   5  -7   1    0.20    1.40
   5  -7   1    3.10    2.30
   5  -7   1   -0.90    1.80
  -5   6  -1    3.20    1.30
  -5   6  -1    5.80    1.80
   5  -6   1    8.80    1.90
   5  -6   1    3.20    1.30
   5  -6   1    1.90    1.30
   5  -6   1    8.50    2.30
  -5   5  -1   11.90    2.20
  -5   5  -1   12.70    1.60
  -5   5  -1   11.30    1.40
   5  -5   1   10.30    1.40
   5  -5   1   13.50    1.50
   5  -5   1    6.50    2.20
  -5   4  -1   35.80    3.10
  -5   4  -1   38.40    2.30
  -5   4  -1   32.80    2.10
   5  -4   1   34.90    2.30
   5  -4   1   34.70    3.40
   5  -4   1   31.20    2.20
  -5   3  -1    2.90    1.20
  -5   3  -1    8.30    1.00
   5  -3   1    6.30    1.00
   5  -3   1    3.70    0.90
   5  -3   1    5.30    1.60
  -5   2  -1  184.48    9.60
  -5   2  -1  188.18    8.00
  -5   2  -1  184.78    8.00
   5  -2   1  187.18    8.00
   5  -2   1  183.48    8.00
   5  -2   1  178.58    9.70
  -5   1  -1    6.00    0.80
  -5   1  -1    7.50    0.80
  -5   1  -1    4.30    1.20
   5  -1   1    6.30    0.80
   5  -1   1    9.70    0.90
   5  -1   1    4.90    1.10
  -5   0  -1   -0.90    0.60
  -5   0  -1   -0.20    0.60
   5   0   1    0.30    0.70
   5   0   1    0.70    0.70
   5   0   1   -0.40    0.80
  -5  -1  -1    5.00    0.80
  -5  -1  -1    4.30    0.80
   5   1   1    6.60    1.30
   5   1   1    3.70    0.80
   5   1   1    7.50    0.90
  -5  -2  -1  175.38    7.90
   5   2   1  181.98    8.60
   5   2   1  178.68    7.90
   5   2   1  183.98    7.90
  -5  -3  -1    4.20    1.20
  -5  -3  -1    3.70    1.00
  -5  -3  -1    9.60    1.40
   5   3   1    5.80    1.10
   5   3   1    2.60    1.10
   5   3   1    5.30    1.40
  -5  -4  -1   33.20    2.30
  -5  -4  -1   41.80    2.90
  -5  -4  -1   33.20    2.60
   5   4   1   37.00    3.10
   5   4   1   28.70    2.40
   5   4   1   29.30    2.40
  -5  -5  -1   11.30    1.60
  -5  -5  -1   11.80    1.80
  -5  -5  -1   14.90    1.90
   5   5   1   11.70    1.70
   5   5   1    8.10    1.50
   5   5   1   11.60    1.90
   5   5   1   13.40    1.60
  -5  -6  -1    3.70    1.60
  -5  -6  -1    7.20    1.80
  -5  -6  -1    1.80    1.20
   5   6   1    1.00    1.40
   5   6   1    5.80    1.60
   5   6   1    5.10    1.40
   5   6   1    7.00    1.90
  -5  -7  -1   -0.50    1.70
   5   7   1    1.30    1.50
   5   7   1   -1.80    1.50
   5   7   1   -1.00    1.90
   5   7   1   -1.80    1.70
  -5  -8  -1   12.40    2.40
   5   8   1   15.60    2.20
   5   8   1   12.20    2.40
   5   8   1   11.30    2.20
   5   8   1   16.20    2.80
  -5  -9  -1   -0.40    2.10
   5   9   1   -2.90    1.70
   5   9   1   -1.20    2.00
   5   9   1    1.10    2.50
   5   9   1   -1.30    1.90
  -5 -10  -1    5.90    2.40
   5  10   1    7.10    2.70
   5  10   1    3.30    2.00
   5  10   1    4.50    2.40
  -5 -11  -1    9.20    2.60
   5  11   1    6.20    2.20
   5  11   1    9.40    3.10
   5  11   1   10.20    2.70
  -5 -12  -1    0.20    2.50
   5  12   1    1.60    2.70
   5  12   1    0.00    2.90
   5  12   1    5.60    2.30
  -5 -13  -1    2.30    2.70
   5  13   1    1.50    2.70
   5  13   1   -1.00    2.90
  -5 -14  -1    1.10    2.90
   5  14   1    0.60    2.90
   5  14   1    2.30    3.40
  -4  14  -1    3.20    2.50
   4 -14   1    1.50    2.40
  -4  13  -1   -3.10    2.40
   4 -13   1    5.80    2.50
  -4  12  -1    2.20    2.30
   4 -12   1    4.10    2.30
  -4  11  -1    3.30    2.20
   4 -11   1   -0.50    2.00
  -4  10  -1   -1.20    1.80
   4 -10   1    1.80    1.90
   4 -10   1    0.80    2.00
   4 -10   1    4.80    3.00
  -4   9  -1    2.20    1.80
   4  -9   1    5.10    1.90
   4  -9   1    2.50    1.90
   4  -9   1   11.70    3.00
  -4   8  -1    0.60    1.60
   4  -8   1   12.20    2.60
   4  -8   1    9.00    1.80
   4  -8   1    3.60    1.70
  -4   7  -1   30.30    2.70
  -4   7  -1   42.40    2.80
   4  -7   1   34.00    2.80
   4  -7   1   38.10    2.80
  -4   6  -1   25.30    2.30
  -4   6  -1   40.80    3.30
  -4   5  -1    0.00    1.50
  -4   5  -1    1.50    1.10
   4  -5   1   -0.20    1.50
   4  -5   1    0.80    1.10
   4  -5   1   -0.80    1.70
   4  -5   1    0.00    1.10
  -4   4  -1   11.60    1.70
   4  -4   1   12.90    1.90
   4  -4   1    3.20    1.00
   4  -4   1    4.40    1.10
  -4   3  -1    7.90    1.10
  -4   3  -1    8.10    1.00
   4  -3   1    6.70    1.00
   4  -3   1    6.50    0.90
   4  -3   1   11.90    1.80
  -4   2  -1    2.20    0.70
  -4   2  -1    3.60    1.00
  -4   2  -1    1.90    0.70
   4  -2   1    5.40    1.30
   4  -2   1    1.50    0.70
  -4   1  -1   10.10    1.00
  -4   1  -1   11.60    0.90
  -4   1  -1   11.00    1.20
   4  -1   1   10.00    1.30
   4  -1   1   11.60    0.90
   4  -1   1   10.20    1.00
  -4   0  -1   -0.50    0.50
  -4   0  -1   -0.20    0.50
   4   0   1    0.70    0.70
   4   0   1   -0.20    0.60
   4   0   1   -0.20    0.60
  -4  -1  -1   12.90    1.10
  -4  -1  -1   11.20    1.00
   4   1   1   10.50    1.00
   4   1   1   13.20    1.50
   4   1   1   11.20    1.00
  -4  -2  -1    0.10    0.30
  -4  -2  -1    1.10    0.80
  -4  -2  -1    2.00    0.90
   4   2   1    1.60    0.90
   4   2   1    2.30    0.80
   4   2   1    3.70    1.20
  -4  -3  -1    8.30    1.30
  -4  -3  -1    7.10    1.20
   4   3   1    7.30    1.20
   4   3   1   11.70    1.60
   4   3   1    7.40    1.10
  -4  -4  -1    4.60    1.20
   4   4   1    9.90    1.60
   4   4   1    4.10    1.20
  -4  -5  -1    2.50    1.40
  -4  -5  -1    1.70    1.50
  -4  -5  -1    0.40    0.70
   4   5   1   -1.90    1.10
   4   5   1    1.70    1.50
   4   5   1    0.90    1.30
   4   5   1   -1.60    1.30
  -4  -6  -1    9.20    1.60
  -4  -7  -1   33.00    3.20
  -4  -7  -1   45.90    3.50
   4   7   1   48.20    3.60
   4   7   1   64.09    4.10
   4   7   1   32.50    3.10
   4   7   1   49.00    3.40
  -4  -8  -1    8.40    2.20
   4   8   1    7.00    2.00
   4   8   1   11.50    2.40
   4   8   1    5.80    1.80
   4   8   1   14.20    2.00
   4   8   1    4.20    2.10
  -4  -9  -1    1.60    2.20
   4   9   1    6.30    2.00
   4   9   1    8.40    1.90
   4   9   1    6.10    2.40
   4   9   1    0.10    1.90
  -4 -10  -1    4.10    2.20
   4  10   1    5.70    2.70
   4  10   1    4.40    2.00
   4  10   1    2.00    2.10
  -4 -11  -1    0.30    2.30
   4  11   1   -0.70    2.60
   4  11   1    2.40    2.00
   4  11   1   -0.30    2.30
  -4 -12  -1    4.50    2.40
   4  12   1    9.30    2.20
   4  12   1    3.50    2.70
   4  12   1    6.20    3.00
  -4 -13  -1    2.40    2.70
   4  13   1   -2.80    2.60
   4  13   1    5.90    3.30
  -4 -14  -1    7.70    3.10
   4  14   1    6.10    3.40
   4  14   1    6.60    3.00
  -3  14  -1   -3.50    2.50
   3 -14   1   -0.90    2.50
  -3  13  -1   -1.80    2.30
   3 -13   1    1.30    2.40
  -3  12  -1    4.90    2.40
   3 -12   1    4.00    2.40
  -3  11  -1   -0.60    2.10
   3 -11   1    2.80    2.10
  -3  10  -1   -1.80    2.00
   3 -10   1    0.40    2.00
   3 -10   1    2.90    2.10
  -3   9  -1    5.40    1.90
   3  -9   1    5.60    2.80
   3  -9   1    5.20    1.90
   3  -9   1    6.70    2.00
  -3   8  -1    1.20    1.60
   3  -8   1    5.40    2.50
   3  -8   1    0.30    1.70
   3  -8   1    3.30    1.90
   3  -8   1    5.50    1.80
  -3   7  -1   13.80    1.80
  -3   7  -1   13.80    2.20
  -3   7  -1   11.10    1.80
   3  -7   1   13.90    1.90
   3  -7   1   11.80    2.00
   3  -7   1   12.90    2.60
   3  -7   1   11.80    1.90
  -3   6  -1   -0.50    0.30
  -3   6  -1    0.30    1.20
  -3   6  -1    2.10    1.30
   3  -6   1    2.40    1.60
   3  -6   1    0.90    2.00
   3  -6   1    0.50    1.30
   3  -6   1    0.00    1.20
  -3   5  -1   19.10    2.30
  -3   5  -1   13.80    1.60
  -3   5  -1   19.00    1.70
   3  -5   1   19.30    2.00
   3  -5   1   18.10    1.70
   3  -5   1   17.30    2.30
   3  -5   1   15.30    1.70
  -3   4  -1    1.10    1.00
  -3   4  -1    1.20    0.90
  -3   4  -1    0.20    0.50
   3  -4   1    2.20    1.20
   3  -4   1    1.30    0.90
   3  -4   1    3.20    1.50
   3  -4   1    0.90    0.90
  -3   3  -1    4.60    1.20
  -3   3  -1    3.60    0.80
   3  -3   1    3.50    0.90
   3  -3   1    4.40    0.90
   3  -3   1    7.00    1.50
  -3   2  -1   38.10    2.60
  -3   2  -1   34.90    1.90
  -3   2  -1   39.80    2.00
   3  -2   1   36.80    1.90
   3  -2   1   38.50    2.00
   3  -2   1   36.40    2.60
  -3   1  -1   -0.30    0.50
  -3   1  -1   -0.90    0.50
  -3   1  -1   -0.70    0.90
   3  -1   1   -0.20    0.60
   3  -1   1   -0.10    0.90
   3  -1   1   -0.50    0.60
  -3   0  -1    0.40    0.50
  -3   0  -1    0.20    0.50
   3   0   1   -0.50    0.60
   3   0   1    0.50    0.60
   3   0   1   -0.40    0.70
  -3  -1  -1   -0.40    0.60
  -3  -1  -1   -1.40    0.60
  -3  -1  -1   -0.50    0.70
   3   1   1   -0.40    0.70
   3   1   1   -0.30    0.90
   3   1   1    0.40    0.70
  -3  -2  -1   35.00    2.10
  -3  -2  -1   37.30    2.10
   3   2   1   38.50    2.10
   3   2   1   40.60    2.40
   3   2   1   32.80    2.10
  -3  -3  -1    5.90    1.10
  -3  -3  -1    4.90    1.10
   3   3   1    3.00    1.00
   3   3   1    3.30    1.00
   3   3   1    4.00    1.20
  -3  -4  -1    3.30    1.20
  -3  -4  -1    4.10    1.30
   3   4   1    2.40    1.10
   3   4   1    1.80    1.10
   3   4   1    3.60    1.20
  -3  -5  -1   19.60    2.00
  -3  -5  -1   16.00    1.80
  -3  -5  -1   15.20    1.80
   3   5   1   20.20    1.90
   3   5   1   12.10    1.70
   3   5   1   15.80    1.70
   3   5   1   17.90    2.10
  -3  -6  -1   -1.10    1.50
  -3  -6  -1    0.90    1.50
  -3  -6  -1    2.60    1.60
   3   6   1    0.20    1.30
   3   6   1    1.50    1.50
   3   6   1    0.70    1.60
   3   6   1   -0.30    1.30
  -3  -7  -1   10.20    2.00
  -3  -7  -1   10.70    2.00
  -3  -7  -1   13.40    2.20
   3   7   1    9.90    2.00
   3   7   1   12.10    2.20
   3   7   1   10.70    1.90
   3   7   1   12.30    1.90
   3   7   1   15.60    2.10
  -3  -8  -1   -0.20    1.90
   3   8   1    3.90    2.10
   3   8   1    1.90    1.60
   3   8   1    1.40    1.60
   3   8   1    3.40    1.90
   3   8   1    1.40    2.00
  -3  -9  -1    4.40    2.00
   3   9   1    4.40    2.10
   3   9   1    6.40    2.50
   3   9   1   10.30    1.90
   3   9   1    6.40    2.20
  -3 -10  -1    1.80    2.20
   3  10   1    2.00    2.50
   3  10   1    2.00    1.80
   3  10   1    0.40    2.00
  -3 -11  -1    3.30    2.40
   3  11   1   -2.40    2.30
   3  11   1   -0.50    2.50
   3  11   1    0.90    1.70
  -3 -12  -1    5.00    2.70
   3  12   1    3.40    1.80
   3  12   1    6.80    2.80
   3  12   1   -1.60    2.80
  -3 -13  -1   -2.20    2.40
   3  13   1    3.10    3.00
   3  13   1    3.20    2.60
  -3 -14  -1    0.10    2.70
   3  14   1    2.10    3.10
   3  14   1    4.40    3.00
  -2  14  -1    4.00    2.60
   2 -14   1    3.50    2.70
  -2  13  -1    2.70    2.40
   2 -13   1    4.80    2.50
  -2  12  -1    4.50    2.40
   2 -12   1   10.60    2.60
  -2  11  -1    7.90    2.40
   2 -11   1   11.70    2.60
  -2  10  -1   20.50    2.90
   2 -10   1   42.40    3.60
   2 -10   1   26.00    2.90
  -2   9  -1    2.40    2.00
  -2   9  -1   13.60    2.50
   2  -9   1   12.90    2.90
   2  -9   1   11.50    2.10
   2  -9   1    9.00    2.10
  -2   8  -1   20.60    2.50
   2  -8   1   23.00    2.50
   2  -8   1   21.00    2.40
   2  -8   1   10.70    1.90
  -2   7  -1   66.89    4.20
   2  -7   1   55.29    3.70
   2  -7   1   59.79    4.10
  -2   6  -1    1.20    1.30
  -2   6  -1    5.90    1.40
  -2   6  -1    9.20    1.70
  -2   6  -1    8.60    1.70
   2  -6   1   10.10    1.80
   2  -6   1    4.60    1.50
   2  -6   1   16.40    2.30
   2  -6   1    1.30    1.30
  -2   5  -1   53.79    3.20
  -2   5  -1   63.49    3.30
  -2   5  -1   49.10    3.70
   2  -5   1   62.09    3.30
   2  -5   1   61.59    3.60
   2  -5   1   59.09    4.10
   2  -5   1   59.69    3.30
  -2   4  -1   19.80    1.70
   2  -4   1   22.70    1.70
   2  -4   1   20.90    1.80
   2  -4   1   21.20    2.20
   2  -4   1   23.00    2.10
  -2   3  -1   23.80    2.00
  -2   3  -1   24.40    1.60
  -2   3  -1   15.60    1.40
   2  -3   1   22.30    2.00
   2  -3   1   19.60    1.60
   2  -3   1   19.40    1.60
   2  -3   1   29.50    2.30
  -2   2  -1  216.88    9.20
  -2   2  -1  217.28   10.90
  -2   2  -1  209.28    9.20
   2  -2   1  212.98    9.20
   2  -2   1  214.68    9.20
   2  -2   1  217.58   11.00
  -2   1  -1    9.00    1.00
  -2   1  -1    8.20    0.70
  -2   1  -1    7.20    0.70
   2  -1   1    7.00    0.60
  -2   0  -1    0.90    0.30
  -2   0  -1    2.00    0.30
   2   0   1    1.70    0.30
   2   0   1    1.10    0.30
  -2  -1  -1   10.60    0.90
   2   1   1   10.00    1.00
   2   1   1    9.80    0.90
   2   1   1   10.10    0.90
  -2  -2  -1  205.68    8.90
  -2  -2  -1  214.78    8.90
   2   2   1  204.78    8.90
   2   2   1  196.08    9.40
   2   2   1  204.28    8.90
  -2  -3  -1   25.90    2.10
  -2  -3  -1   26.40    1.90
   2   3   1   22.80    2.00
   2   3   1   17.80    1.70
   2   3   1   21.40    1.80
  -2  -4  -1   20.10    1.80
  -2  -4  -1   23.40    2.10
  -2  -4  -1   25.70    2.30
   2   4   1   21.90    2.10
   2   4   1   21.60    1.90
   2   4   1   27.10    2.40
   2   4   1   23.40    1.80
  -2  -5  -1   64.09    3.50
  -2  -5  -1   63.49    3.50
  -2  -5  -1   57.99    3.70
   2   5   1   59.29    3.80
   2   5   1   62.09    3.50
   2   5   1   61.59    3.50
   2   5   1   58.19    3.90
  -2  -6  -1    8.40    1.70
  -2  -6  -1    7.60    1.70
  -2  -6  -1    2.00    1.50
   2   6   1    7.90    1.80
   2   6   1    8.80    1.60
   2   6   1    9.00    1.60
   2   6   1    9.90    1.90
   2   6   1    4.70    1.70
   2   7   1   68.29    4.70
   2   7   1   66.19    4.60
   2   7   1   75.19    4.30
  -2  -8  -1   19.80    2.40
  -2  -8  -1   13.00    2.10
   2   8   1   10.30    2.10
   2   8   1   26.10    2.80
   2   8   1   21.60    2.50
  -2  -9  -1   10.30    2.30
   2   9   1   16.10    1.90
   2   9   1    5.90    2.20
   2   9   1   17.00    2.70
   2   9   1   11.60    2.60
  -2 -10  -1   42.70    3.80
   2  10   1   30.60    3.50
   2  10   1   30.40    3.40
  -2 -11  -1   17.50    2.90
   2  11   1   30.20    2.80
   2  11   1    9.00    2.80
   2  11   1   23.90    3.30
  -2 -12  -1    6.60    2.50
   2  12   1    6.20    3.00
   2  12   1    6.00    2.60
   2  12   1    7.80    1.80
  -2 -13  -1   12.50    3.00
   2  13   1    6.30    3.10
   2  13   1    1.40    2.50
  -2 -14  -1    2.70    2.90
   2  14   1    1.50    2.80
   2  14   1    5.50    3.30
  -1  14  -1    4.10    2.80
  -1  14  -1    3.40    3.00
   1 -14   1    1.10    2.70
  -1  13  -1    1.50    2.50
  -1  13  -1   -0.40    2.70
   1 -13   1    2.10    2.40
  -1  12  -1    2.90    2.60
  -1  12  -1   -2.40    2.10
   1 -12   1   -1.40    2.30
  -1  11  -1   -0.20    2.20
  -1  11  -1   -0.70    2.40
   1 -11   1    0.00    2.20
  -1  10  -1    0.60    2.50
  -1  10  -1    3.00    2.10
   1 -10   1    5.10    2.20
  -1   9  -1   -1.10    2.00
  -1   9  -1    0.20    1.80
   1  -9   1    0.10    1.70
   1  -9   1   -0.70    1.60
  -1   8  -1   -2.30    1.80
  -1   8  -1    2.00    1.60
  -1   8  -1    2.70    1.70
   1  -8   1    1.40    2.10
   1  -8   1    2.00    1.50
   1  -8   1    3.40    1.70
   1  -8   1    0.40    1.80
  -1   7  -1   -0.40    0.50
  -1   7  -1    1.50    1.50
  -1   7  -1   -0.40    1.70
  -1   7  -1   -2.40    1.40
   1  -7   1   -2.90    1.40
   1  -7   1   -0.90    1.30
   1  -7   1   -1.70    1.60
   1  -7   1    1.00    1.90
  -1   6  -1   35.20    2.90
  -1   6  -1   34.40    2.60
  -1   6  -1   32.20    3.00
   1  -6   1   29.80    2.90
   1  -6   1   34.10    2.60
   1  -6   1   33.10    2.60
   1  -6   1   33.10    3.30
  -1   5  -1    6.20    1.50
  -1   5  -1    8.00    1.40
  -1   5  -1    6.20    1.50
   1  -5   1    8.30    1.40
   1  -5   1    7.40    1.80
   1  -5   1    5.20    1.40
   1  -5   1    5.00    1.30
  -1   4  -1   26.50    2.30
  -1   4  -1   24.50    1.90
  -1   4  -1   25.30    2.30
   1  -4   1   26.00    2.30
   1  -4   1   29.60    2.70
   1  -4   1   26.60    2.00
   1  -4   1   24.40    1.90
  -1   3  -1    7.00    1.10
  -1   3  -1    7.90    1.30
  -1   3  -1    9.30    1.10
   1  -3   1    7.90    1.10
   1  -3   1    5.60    1.20
   1  -3   1    8.70    1.60
   1  -3   1    9.30    1.20
  -1   2  -1   11.00    1.00
  -1   2  -1   11.30    1.00
   1  -2   1   10.50    1.30
   1  -2   1    8.00    1.00
   1  -2   1    9.50    0.90
   1  -2   1    9.80    1.00
  -1   1  -1    4.20    0.40
  -1   1  -1    2.60    0.50
  -1   1  -1    3.70    0.40
   1  -1   1    3.30    0.30
   1  -1   1    3.40    0.50
   1  -1   1    3.50    0.30
  -1  -1  -1    2.20    0.40
  -1  -1  -1    3.70    0.40
  -1  -1  -1    3.60    0.40
   1   1   1    2.60    0.40
   1   1   1    3.20    0.40
   1   1   1    3.10    0.50
  -1  -2  -1   10.30    1.10
   1   2   1   12.50    1.20
   1   2   1   12.40    1.20
   1   2   1   11.60    1.10
  -1  -3  -1    9.60    1.30
  -1  -3  -1    8.60    1.20
  -1  -3  -1    7.90    1.30
   1   3   1    8.10    1.20
   1   3   1    7.40    1.30
   1   3   1    7.30    1.10
   1   3   1    8.70    1.30
  -1  -4  -1   27.20    2.20
  -1  -4  -1   27.80    2.10
  -1  -4  -1   26.30    2.30
   1   4   1   25.90    2.10
   1   4   1   27.90    2.30
   1   4   1   28.30    2.40
   1   4   1   23.80    2.10
   1   4   1   26.50    2.10
  -1  -5  -1    5.90    1.30
  -1  -5  -1    6.20    1.50
  -1  -5  -1    7.10    1.40
   1   5   1    6.60    1.50
   1   5   1    6.70    1.50
   1   5   1    6.90    1.50
   1   5   1    9.40    1.50
   1   5   1    8.50    1.20
  -1  -6  -1   31.40    3.00
  -1  -6  -1   37.30    2.70
  -1  -6  -1   35.50    2.80
   1   6   1   31.90    3.10
   1   6   1   33.60    2.50
   1   6   1   35.80    2.70
   1   6   1   32.60    2.70
   1   6   1   33.90    3.00
  -1  -7  -1   -0.40    1.50
  -1  -7  -1   -1.50    1.30
  -1  -7  -1   -3.00    1.40
   1   7   1   -1.60    1.50
   1   7   1   -0.80    1.50
   1   7   1   -1.40    1.20
   1   7   1   -1.10    1.80
  -1  -8  -1    3.40    1.80
  -1  -8  -1   -0.80    1.60
  -1  -8  -1    1.80    1.70
   1   8   1    4.10    2.10
   1   8   1    2.70    1.60
   1   8   1    2.10    1.70
   1   8   1    2.20    1.30
   1   8   1    2.40    1.80
  -1  -9  -1   -2.90    1.70
   1   9   1   -2.50    1.20
   1   9   1   -2.50    1.70
   1   9   1   -0.80    2.10
  -1 -10  -1    5.80    2.40
   1  10   1    4.10    2.30
   1  10   1    3.70    1.50
   1  10   1    2.70    2.50
  -1 -11  -1   -1.80    2.20
   1  11   1   -4.20    2.20
   1  11   1   -1.40    2.30
   1  11   1   -1.00    1.40
  -1 -12  -1    0.10    2.40
   1  12   1   -0.20    2.20
   1  12   1    0.40    2.70
   1  12   1   -1.50    1.40
  -1 -13  -1    0.70    2.70
   1  13   1    0.70    2.90
   1  13   1   -0.10    2.50
  -1 -14  -1    7.10    2.90
   1  14   1    3.20    2.70
   1  14   1    0.40    3.20
   0  14  -1    0.70    2.60
   0  14  -1    0.30    2.90
   0 -14   1    1.10    2.70
   0  13  -1   12.80    3.00
   0  13  -1    6.00    2.70
   0 -13   1   11.40    2.90
   0  12  -1   -0.50    2.30
   0  12  -1    2.20    2.60
   0 -12   1    3.80    2.50
   0  11  -1    8.70    2.70
   0  11  -1    6.20    2.50
   0 -11   1    6.80    2.60
   0  10  -1   80.99    5.40
   0 -10   1   56.69    4.70
   0   9  -1    6.60    2.20
   0   9  -1    8.70    1.20
   0   9  -1   12.50    2.50
   0  -9   1    7.30    2.10
   0  -9   1    7.40    2.10
   0   8  -1   16.80    2.40
   0   8  -1   20.20    2.50
   0   8  -1   19.90    1.70
   0  -8   1   19.30    2.40
   0  -8   1    8.80    2.00
   0  -8   1   16.50    2.30
   0   7  -1   20.80    2.50
   0   7  -1   27.80    2.00
   0   7  -1   37.60    2.70
   0  -7   1   34.30    3.10
   0   6  -1   58.99    3.30
   0   6  -1   70.69    4.20
   0   6  -1   57.79    3.90
   0   6  -1   55.79    3.10
   0  -6   1   48.70    3.40
   0  -6   1   57.89    3.80
   0  -6   1   59.49    3.50
   0   5  -1   43.60    3.00
   0   5  -1   44.60    2.60
   0   5  -1   42.50    2.40
   0  -5   1   45.30    3.00
   0  -5   1   37.00    2.70
   0  -5   1   41.60    2.60
   0   4  -1  222.38   11.10
   0   4  -1  231.58   10.60
   0   4  -1  239.18   11.20
   0   4  -1  265.77   12.50
   0  -4   1  271.37   12.60
   0  -4   1  239.88   10.60
   0  -4   1  239.18   10.70
   0  -4   1  240.08   11.20
   0   3  -1   31.00    2.30
   0   3  -1   27.50    2.00
   0  -3   1   36.00    2.10
   0  -3   1   33.90    2.30
   0  -3   1   25.80    2.00
   0   2  -1    1.10    0.70
   0   2  -1    5.00    0.80
   0   2  -1    4.50    0.80
   0  -2   1    1.50    0.70
   0  -2   1    2.20    0.60
   0  -2   1    4.80    0.70
   0  -2   1    7.20    0.90
   0   1  -1    0.60    0.30
   0   1  -1    0.70    0.30
   0   1  -1    0.00    0.30
   0  -1   1    0.00    0.30
   0  -1   1   -0.60    0.20
   0   0  -1   -0.10    0.10
   0   0  -1   -0.20    0.10
   0   0  -1   -0.10    0.10
   0   0   1   -0.10    0.10
   0   0   1   -0.20    0.10
   0   0   1   -0.20    0.10
   0  -1  -1    0.00    0.30
   0  -1  -1    1.80    0.40
   0  -1  -1    1.20    0.40
   0   1   1    3.10    0.50
   0   1   1    0.80    0.40
   0   1   1    2.30    0.40
   0  -2  -1    2.30    0.70
   0  -2  -1    3.30    0.60
   0  -2  -1    2.40    0.60
   0   2   1    2.40    0.70
   0   2   1    6.00    0.70
   0   2   1    3.20    0.70
   0   2   1    3.60    0.80
   0  -3  -1   35.00    2.50
   0  -3  -1   33.60    2.20
   0  -3  -1   24.30    2.10
   0   3   1   38.60    2.20
   0   3   1   33.90    2.50
   0   3   1   35.50    2.10
   0  -4  -1  247.78   11.30
   0  -4  -1  249.08   10.80
   0  -4  -1  225.68   10.70
   0   4   1  241.88   11.40
   0   4   1  225.18   10.70
   0   4   1  254.97   11.40
   0   4   1  256.17   12.60
   0   4   1  262.77   10.80
   0  -5  -1   43.40    3.20
   0   5   1   52.99    2.90
   0   5   1   53.79    3.50
   0  -6  -1   49.90    3.40
   0  -6  -1   72.49    3.70
   0  -6  -1   59.79    3.90
   0   6   1   67.79    3.60
   0   6   1   52.19    3.30
   0   6   1   68.09    4.20
   0   6   1   41.70    3.30
   0   6   1   57.99    4.00
   0  -7  -1   38.30    3.40
   0  -7  -1   34.10    3.00
   0   7   1   43.50    3.40
   0   7   1   35.80    3.40
   0   7   1   33.00    2.50
   0  -8  -1   19.90    2.50
   0  -8  -1    9.80    2.00
   0  -8  -1   14.80    2.20
   0   8   1    5.90    2.10
   0   8   1   13.20    1.60
   0   8   1   15.40    2.30
   0   8   1   18.00    2.60
   0   8   1   19.40    2.50
   0  -9  -1    9.30    2.30
   0   9   1   14.40    2.70
   0   9   1   10.70    1.50
   0   9   1    9.20    2.30
   0 -10  -1   84.99    5.10
   0  10   1   62.39    4.20
   0  10   1   79.29    5.60
   0 -11  -1    9.00    2.60
   0  11   1    6.90    1.40
   0  11   1   11.10    2.90
   0  11   1    6.10    2.40
   0 -12  -1    7.70    2.60
   0  12   1    1.00    2.40
   0  12   1    6.20    2.90
   0 -13  -1    7.90    2.90
   0  13   1    2.70    2.50
   0  13   1   11.40    3.30
   0 -14  -1   12.00    3.20
   0  14   1    5.00    3.00
   0  14   1   -1.00    2.60
   1  14  -1    0.70    2.70
   1  14  -1    1.10    2.90
  -1 -14   1   -3.80    2.60
   1  13  -1    0.00    2.50
   1  13  -1    4.90    2.90
  -1 -13   1   -4.10    2.40
   1  12  -1   -0.20    2.50
   1  12  -1   -2.10    2.50
  -1 -12   1   -1.40    2.30
   1  11  -1   -0.80    2.40
   1  11  -1    0.50    1.20
   1  11  -1    2.40    2.10
  -1 -11   1   -0.50    2.10
   1  10  -1    9.00    1.40
   1  10  -1    4.90    2.50
   1  10  -1    7.90    2.50
  -1 -10   1    4.70    2.40
   1   9  -1    1.40    2.10
   1   9  -1    2.00    1.30
   1   9  -1    2.10    1.80
  -1  -9   1    1.20    1.70
   1   8  -1    1.30    1.90
   1   8  -1    2.10    1.80
   1   8  -1   -0.30    1.70
   1   8  -1    4.60    1.80
   1   8  -1    2.50    1.10
  -1  -8   1   -0.50    1.70
  -1  -8   1   -0.60    1.60
  -1  -8   1    1.40    1.70
   1   7  -1   12.30    2.20
   1   7  -1   14.60    2.00
   1   7  -1   15.90    1.50
   1   7  -1   18.50    2.30
   1   7  -1   18.10    2.10
  -1  -7   1   16.00    2.10
  -1  -7   1   13.90    1.90
  -1  -7   1   12.10    2.00
   1   6  -1   12.50    1.40
   1   6  -1   16.30    2.00
   1   6  -1   12.80    1.90
   1   6  -1   13.90    1.90
   1   6  -1   10.00    1.80
  -1  -6   1   12.20    1.80
  -1  -6   1   11.40    2.10
  -1  -6   1   13.70    2.00
  -1  -6   1   13.10    1.90
   1   5  -1   -0.90    1.00
   1   5  -1    0.20    1.10
   1   5  -1   -0.90    1.00
   1   5  -1   -0.40    1.30
  -1  -5   1   -0.20    1.10
  -1  -5   1   -0.90    1.20
  -1  -5   1    0.40    1.20
  -1  -5   1   -0.30    1.30
   1   4  -1    2.40    1.00
   1   4  -1    4.70    1.20
   1   4  -1    3.00    1.10
   1   4  -1    5.30    1.30
  -1  -4   1    4.30    1.40
  -1  -4   1    1.60    1.20
  -1  -4   1    5.10    1.20
  -1  -4   1    2.90    1.20
   1   3  -1    4.30    1.10
   1   3  -1    3.10    1.20
   1   3  -1    2.90    1.10
   1   3  -1    3.10    1.10
  -1  -3   1    3.20    1.20
  -1  -3   1    2.10    1.20
  -1  -3   1    4.10    1.10
  -1  -3   1    3.00    1.20
   1   2  -1    2.70    0.80
   1   2  -1    2.40    0.80
   1   2  -1    2.50    0.80
   1   2  -1    3.20    0.80
  -1  -2   1    2.80    0.80
  -1  -2   1    3.90    0.80
  -1  -2   1    4.70    0.90
  -1  -2   1    5.30    0.90
   1   1  -1    0.20    0.30
   1   1  -1    0.10    0.30
   1   1  -1    0.30    0.20
   1   1  -1    0.30    0.30
  -1  -1   1   -0.20    0.10
  -1  -1   1    0.50    0.20
  -1  -1   1    0.00    0.30
  -1  -1   1    0.00    0.30
   1   0  -1   -1.10    0.20
   1   0  -1   -1.50    0.10
  -1   0   1   -1.30    0.10
  -1   0   1   -1.00    0.10
   1  -1  -1    0.60    0.30
   1  -1  -1    0.00    0.30
  -1   1   1    0.00    0.30
  -1   1   1    0.40    0.40
  -1   1   1   -0.10    0.20
   1  -2  -1    4.60    0.70
   1  -2  -1    3.80    0.80
   1  -2  -1    3.40    0.80
   1  -2  -1    3.10    1.00
  -1   2   1    4.00    1.00
  -1   2   1    4.30    0.80
   1  -3  -1    2.00    1.10
   1  -3  -1    3.80    1.50
   1  -3  -1    1.90    1.10
   1  -3  -1    3.80    0.80
   1  -3  -1    3.50    1.00
  -1   3   1    2.20    1.30
  -1   3   1    3.70    0.80
  -1   3   1    2.90    1.00
   1  -4  -1    4.00    0.80
   1  -4  -1    6.20    1.50
   1  -4  -1    2.90    1.10
   1  -4  -1    1.90    1.00
   1  -4  -1    2.30    1.10
  -1   4   1    5.00    0.80
  -1   4   1    1.80    1.10
  -1   4   1    4.40    1.30
  -1   4   1    1.00    0.60
  -1   4   1    3.70    1.40
   1  -5  -1   -1.00    1.00
   1  -5  -1   -0.90    1.20
   1  -5  -1   -0.70    1.20
  -1   5   1    1.20    1.20
  -1   5   1   -0.30    1.30
  -1   5   1    1.50    1.30
  -1   5   1    3.10    1.20
  -1   5   1    0.60    0.70
   1  -6  -1   12.00    1.90
   1  -6  -1    7.70    1.70
   1  -6  -1   12.80    1.80
  -1   6   1   12.60    1.30
  -1   6   1   14.50    2.10
  -1   6   1    9.10    1.90
  -1   6   1   13.10    1.90
  -1   6   1   12.90    1.70
   1  -7  -1   19.60    2.20
   1  -7  -1   19.10    2.20
   1  -7  -1   12.60    2.30
  -1   7   1   20.80    2.20
  -1   7   1   15.20    2.40
  -1   7   1   13.90    1.40
  -1   7   1   18.20    2.10
  -1   7   1   16.00    2.30
   1  -8  -1    0.90    1.70
   1  -8  -1    1.00    1.70
   1  -8  -1   -0.40    1.60
  -1   8   1    1.60    1.70
  -1   8   1    3.30    1.80
  -1   8   1    0.30    2.00
   1  -9  -1    1.80    2.00
   1  -9  -1    3.00    1.90
  -1   9   1    0.90    2.20
  -1   9   1    2.70    2.00
   1 -10  -1    3.80    2.10
  -1  10   1    5.10    2.70
  -1  10   1    6.10    2.30
   1 -11  -1    0.20    2.20
  -1  11   1   -0.40    2.10
  -1  11   1    1.30    2.50
   1 -12  -1   -1.40    2.30
  -1  12   1   -1.50    2.60
  -1  12   1   -3.50    2.20
   1 -13  -1    3.40    2.60
  -1  13   1    2.30    2.90
  -1  13   1    6.20    2.60
   1 -14  -1   -3.20    2.40
  -1  14   1    0.00    2.50
  -1  14   1   -0.60    2.90
   2  14  -1   19.30    3.70
   2  14  -1   12.10    3.10
  -2 -14   1   14.80    3.20
   2  13  -1    4.30    2.90
   2  13  -1   11.50    3.20
  -2 -13   1    7.30    3.00
   2  12  -1   10.90    2.80
   2  12  -1    6.30    1.60
   2  12  -1    3.30    2.60
  -2 -12   1    5.80    2.40
   2  11  -1    9.60    1.70
   2  11  -1    4.20    2.30
   2  11  -1   11.00    2.80
  -2 -11   1   10.20    2.60
   2  10  -1   11.80    2.80
   2  10  -1   17.10    2.00
   2  10  -1   12.20    2.60
  -2 -10   1   16.90    2.60
   2   9  -1   37.20    3.10
   2   9  -1   35.30    3.30
   2   9  -1   39.00    3.80
   2   9  -1   48.70    4.30
  -2  -9   1   34.70    3.30
   2   8  -1   14.90    2.30
   2   8  -1   13.90    2.10
   2   8  -1   13.40    2.20
   2   8  -1   23.90    2.20
   2   8  -1    4.50    2.00
  -2  -8   1   15.90    2.10
  -2  -8   1   10.30    2.10
  -2  -8   1    6.60    2.00
   2   7  -1   35.80    3.10
   2   7  -1   39.90    3.40
   2   7  -1   46.40    3.50
  -2  -7   1   41.40    3.30
   2   6  -1  130.09    6.40
  -2  -6   1   90.99    5.70
   2   5  -1   83.99    4.50
   2   5  -1   79.09    4.20
   2   5  -1   85.69    4.80
   2   5  -1   77.89    4.10
  -2  -5   1   77.59    4.20
  -2  -5   1   82.19    4.50
  -2  -5   1   82.39    4.30
   2   4  -1   50.89    3.20
  -2  -4   1   53.09    3.20
   2   3  -1   24.30    2.00
   2   3  -1   29.20    2.20
   2   3  -1   27.40    1.90
  -2  -3   1   38.20    2.20
  -2  -3   1   28.10    2.20
  -2  -3   1   25.90    2.00
  -2  -3   1   31.70    2.10
   2   2  -1    8.40    1.10
   2   2  -1    5.80    1.00
   2   2  -1    6.90    0.90
   2   2  -1    7.70    1.10
  -2  -2   1    6.60    1.00
  -2  -2   1    6.20    0.90
  -2  -2   1    5.70    1.00
   2   1  -1    3.60    0.60
   2   1  -1    3.40    0.60
   2   1  -1    3.50    0.60
  -2  -1   1    3.50    0.60
  -2  -1   1    2.90    0.60
  -2  -1   1    4.20    0.60
   2   0  -1    0.80    0.30
   2   0  -1    2.00    0.40
   2   0  -1    1.30    0.40
  -2   0   1    0.90    0.40
  -2   0   1    1.70    0.40
  -2   0   1    1.00    0.40
   2  -1  -1    3.50    0.60
   2  -1  -1    4.00    0.80
   2  -1  -1    5.00    0.60
  -2   1   1    2.80    0.60
  -2   1   1    3.00    0.70
  -2   1   1    4.40    0.60
   2  -2  -1    6.40    0.90
   2  -2  -1    5.80    0.90
   2  -2  -1    6.80    1.20
  -2   2   1    6.20    1.20
  -2   2   1    7.00    1.00
  -2   2   1    7.50    0.90
   2  -3  -1   26.40    1.80
   2  -3  -1   33.50    2.30
   2  -3  -1   21.70    1.70
  -2   3   1   20.90    1.70
  -2   3   1   29.00    1.80
   2  -4  -1   49.10    2.90
   2  -4  -1   34.60    2.20
   2  -4  -1   35.00    2.40
  -2   4   1   42.40    2.80
   2  -5  -1   80.49    4.50
   2  -5  -1   75.39    3.90
   2  -5  -1   82.39    4.10
   2  -5  -1   88.89    5.10
   2  -5  -1   77.59    4.10
  -2   5   1   80.29    4.50
  -2   5   1   77.59    4.10
   2  -6  -1   95.39    5.20
  -2   6   1  123.89    6.40
   2  -7  -1   32.40    2.90
   2  -7  -1   29.00    2.80
   2  -7  -1   41.50    3.40
  -2   7   1   43.00    3.70
  -2   7   1   38.90    3.50
   2  -8  -1   11.50    2.00
   2  -8  -1    7.20    1.80
   2  -8  -1   15.70    2.40
  -2   8   1    4.20    1.80
  -2   8   1   14.40    2.30
   2  -9  -1   39.80    3.50
   2  -9  -1   44.20    3.70
  -2   9   1   46.60    4.30
  -2   9   1   38.30    3.60
   2 -10  -1   14.00    2.50
  -2  10   1    9.50    2.40
  -2  10   1   10.70    2.80
   2 -11  -1   12.90    2.70
  -2  11   1   10.90    2.80
  -2  11   1    5.80    2.50
   2 -12  -1    4.70    2.40
  -2  12   1    3.90    2.30
  -2  12   1    8.80    2.90
   2 -13  -1   15.60    3.10
  -2  13   1   14.40    3.30
  -2  13   1    9.50    2.90
   2 -14  -1   13.60    3.20
  -2  14   1    7.80    2.90
   3  14  -1    2.90    3.20
   3  14  -1    1.10    2.70
  -3 -14   1    2.40    2.80
   3  13  -1    1.80    2.90
   3  13  -1   -3.40    2.60
  -3 -13   1    0.00    2.50
   3  12  -1   -1.40    2.50
   3  12  -1    5.00    1.80
   3  12  -1    1.40    2.80
  -3 -12   1    0.20    2.30
   3  11  -1    7.50    2.70
   3  11  -1    9.20    2.80
   3  11  -1    6.60    1.80
  -3 -11   1    5.90    2.20
   3  10  -1    9.50    2.70
   3  10  -1    6.90    1.80
   3  10  -1    5.90    2.50
  -3 -10   1    7.70    2.20
   3   9  -1    0.00    1.70
   3   9  -1   -1.20    1.90
   3   9  -1   -0.10    2.20
   3   9  -1   -0.80    1.40
  -3  -9   1    1.20    2.10
   3   8  -1    3.70    1.70
   3   8  -1    3.70    1.80
   3   8  -1    6.90    2.00
   3   8  -1   -2.20    1.60
  -3  -8   1    4.00    1.80
  -3  -8   1    3.90    1.90
   3   7  -1   11.60    2.10
   3   7  -1   12.00    2.10
   3   7  -1   12.00    2.10
   3   7  -1   12.80    1.90
  -3  -7   1   11.90    2.00
  -3  -7   1   10.00    1.90
  -3  -7   1   14.40    2.00
   3   6  -1    4.50    1.40
   3   6  -1    5.10    1.70
   3   6  -1    5.40    1.40
   3   6  -1    1.50    1.30
  -3  -6   1    0.90    1.30
  -3  -6   1    4.80    1.50
  -3  -6   1    8.10    1.60
   3   5  -1    9.70    1.50
   3   5  -1   10.90    1.70
   3   5  -1   11.00    1.60
   3   5  -1   10.00    1.60
  -3  -5   1   12.90    1.70
  -3  -5   1   10.20    1.50
  -3  -5   1    7.70    1.50
   3   4  -1    4.40    1.20
   3   4  -1    3.50    1.20
   3   4  -1    5.70    1.10
   3   4  -1    6.60    1.20
  -3  -4   1    2.70    1.00
  -3  -4   1    4.50    1.20
  -3  -4   1    6.00    1.20
   3   3  -1    5.70    1.00
   3   3  -1    5.20    1.10
   3   3  -1    7.10    0.90
   3   3  -1    5.20    1.20
  -3  -3   1    6.60    1.20
  -3  -3   1    5.60    1.10
   3   2  -1   98.39    4.80
   3   2  -1  101.69    4.50
   3   2  -1   97.89    4.50
   3   2  -1   91.69    5.00
  -3  -2   1  100.19    4.80
  -3  -2   1  100.29    4.50
  -3  -2   1  104.79    4.60
   3   1  -1   19.20    1.70
   3   1  -1   17.60    1.40
   3   1  -1   14.80    1.40
  -3  -1   1   15.90    1.40
  -3  -1   1   16.90    1.40
   3   0  -1    0.00    0.60
   3   0  -1    0.20    0.70
   3   0  -1    1.00    0.70
  -3   0   1    0.50    0.60
  -3   0   1    0.40    0.70
  -3   0   1    0.10    0.70
   3  -1  -1   21.00    1.50
   3  -1  -1   17.00    1.40
   3  -1  -1   16.70    1.80
  -3   1   1   18.80    1.40
  -3   1   1   19.60    1.70
  -3   1   1   21.10    1.40
   3  -2  -1  101.89    4.70
   3  -2  -1  101.09    5.60
   3  -2  -1  105.09    4.60
  -3   2   1   99.29    5.50
  -3   2   1  102.19    4.60
  -3   2   1  101.49    4.60
   3  -3  -1    7.20    1.10
   3  -3  -1    8.00    1.50
   3  -3  -1    5.30    1.00
  -3   3   1    7.00    1.10
  -3   3   1    6.00    1.30
  -3   3   1    6.00    1.00
   3  -4  -1    5.00    1.40
   3  -4  -1    5.80    1.60
   3  -4  -1    3.00    1.10
   3  -4  -1    1.90    1.00
  -3   4   1   -0.10    0.40
  -3   4   1   -0.10    0.60
   3  -5  -1   10.60    1.50
   3  -5  -1    9.40    2.00
   3  -5  -1    7.90    1.60
   3  -5  -1   12.10    1.10
   3  -5  -1    7.50    1.40
  -3   5   1    9.00    1.40
  -3   5   1    6.70    1.50
  -3   5   1   10.10    1.40
   3  -6  -1    6.00    1.70
   3  -6  -1    8.40    2.20
   3  -6  -1    2.70    1.40
   3  -6  -1    6.10    0.90
   3  -6  -1    5.20    1.40
  -3   6   1   -0.20    1.30
  -3   6   1    5.30    1.30
   3  -7  -1   15.00    2.20
   3  -7  -1   13.40    2.00
   3  -7  -1   15.20    2.00
   3  -7  -1   12.50    1.20
  -3   7   1    9.90    2.00
  -3   7   1   11.50    1.80
  -3   7   1   13.70    1.80
   3  -8  -1    1.80    1.60
   3  -8  -1    4.00    1.80
  -3   8   1    2.30    1.70
   3  -9  -1    1.60    1.90
   3  -9  -1   -1.00    1.70
  -3   9   1   -1.50    1.70
   3 -10  -1    6.60    2.20
  -3  10   1    5.80    2.20
   3 -11  -1   11.10    2.60
  -3  11   1    5.90    2.40
   3 -12  -1    5.30    2.50
  -3  12   1    2.10    2.30
   3 -13  -1   -1.10    2.30
  -3  13   1   -0.70    2.50
   3 -14  -1    6.20    2.80
  -3  14   1   -1.60    2.70
   4  14  -1    3.60    3.00
   4  14  -1    6.00    3.40
  -4 -14   1   -0.30    2.90
   4  13  -1    1.40    2.50
   4  13  -1    4.50    3.10
  -4 -13   1    6.00    2.80
   4  12  -1    2.80    1.80
   4  12  -1   -0.90    2.60
   4  12  -1    3.20    2.40
  -4 -12   1    3.00    2.50
   4  11  -1   16.10    2.20
   4  11  -1   13.20    2.90
   4  11  -1    4.90    2.50
  -4 -11   1    9.00    2.60
   4  10  -1   -1.40    1.60
   4  10  -1    1.10    2.40
   4  10  -1   -1.00    2.20
  -4 -10   1    1.20    2.30
   4   9  -1   14.00    2.30
   4   9  -1    6.50    2.30
   4   9  -1    8.30    2.60
  -4  -9   1    5.40    2.20
   4   8  -1    0.80    1.60
   4   8  -1    5.30    1.70
   4   8  -1    5.40    2.20
   4   8  -1    2.10    1.80
  -4  -8   1    3.00    2.00
   4   7  -1   63.19    4.30
   4   6  -1    5.50    1.60
   4   6  -1   10.40    1.60
  -4  -6   1    6.60    1.60
  -4  -6   1   15.60    1.80
  -4  -5   1   47.30    3.00
   4   4  -1    6.10    1.20
   4   4  -1    3.50    1.20
   4   4  -1   11.80    1.50
   4   3  -1   24.60    2.10
   4   3  -1   34.80    2.00
   4   3  -1   29.70    2.10
   4   3  -1   32.80    2.50
  -4  -3   1   32.50    2.40
  -4  -3   1   35.00    2.20
   4   2  -1    0.30    0.80
   4   2  -1    1.50    1.00
   4   2  -1   -0.30    0.80
  -4  -2   1    1.10    0.90
  -4  -2   1    0.70    1.00
  -4  -2   1    0.70    0.80
   4   1  -1   41.20    2.20
   4   1  -1   41.00    2.60
   4   1  -1   40.90    2.20
  -4  -1   1   37.00    2.10
  -4  -1   1   41.10    2.20
   4   0  -1   -0.80    0.70
   4   0  -1   -1.40    0.70
   4   0  -1   -0.30    0.70
  -4   0   1   -1.30    0.70
  -4   0   1    0.20    0.70
  -4   0   1   -0.90    0.70
   4  -1  -1   38.10    2.70
   4  -1  -1   42.30    2.20
   4  -1  -1   41.80    2.10
  -4   1   1   40.80    2.60
  -4   1   1   39.40    2.10
  -4   1   1   38.90    2.10
   4  -2  -1    0.30    0.80
   4  -2  -1   -1.10    1.20
   4  -2  -1    1.10    0.90
  -4   2   1    0.70    0.70
  -4   2   1    0.70    0.80
  -4   2   1   -1.70    1.00
   4  -3  -1   20.90    1.60
   4  -3  -1   25.50    1.80
  -4   3   1   26.90    1.90
   4  -4  -1    4.80    1.20
   4  -4  -1    2.60    1.00
  -4   4   1    9.50    1.30
   4  -5  -1   74.49    4.50
  -4   5   1   81.19    5.00
   4  -6  -1   22.60    2.70
   4  -6  -1    9.80    1.60
  -4   6   1   13.90    1.70
   4  -8  -1    3.00    1.70
   4  -8  -1    2.20    1.70
  -4   8   1    4.30    1.70
   4  -9  -1    9.70    2.10
   4  -9  -1    4.90    1.90
  -4   9   1    4.10    1.80
   4 -10  -1   -3.00    1.80
   4 -10  -1   -0.50    2.00
  -4  10   1    2.80    2.00
   4 -11  -1   11.70    2.40
  -4  11   1    2.00    2.10
   4 -12  -1    2.20    2.30
  -4  12   1    1.60    2.20
   4 -13  -1    5.10    2.60
   4 -14  -1    7.70    2.90
   5  14  -1   -3.30    2.70
   5  14  -1    3.60    3.40
  -5 -14   1    1.60    2.80
   5  13  -1    0.90    2.50
   5  13  -1    3.10    3.10
  -5 -13   1    3.10    2.80
   5  12  -1    4.60    2.90
   5  12  -1    4.10    2.60
   5  12  -1    5.40    2.10
  -5 -12   1    2.30    2.50
   5  11  -1    3.50    2.00
   5  11  -1    4.00    2.60
   5  11  -1    5.90    2.80
  -5 -11   1    2.60    2.50
   5  10  -1    2.80    1.90
   5  10  -1    3.90    2.50
   5  10  -1   -1.70    1.70
   5  10  -1    1.60    2.30
  -5 -10   1    4.40    2.20
   5   9  -1    6.60    2.50
   5   9  -1    2.50    1.80
   5   9  -1    0.60    2.10
  -5  -9   1    1.50    2.10
   5   8  -1    2.40    1.80
   5   8  -1    5.40    2.00
   5   8  -1    5.50    2.20
   5   8  -1    3.30    1.70
  -5  -8   1    4.30    2.00
   5   7  -1   35.90    3.00
   5   7  -1   32.50    3.10
   5   7  -1   33.40    3.10
   5   7  -1   36.90    3.30
  -5  -7   1   38.10    3.30
  -5  -7   1   36.20    3.30
   5   6  -1    1.60    1.30
   5   6  -1    1.30    1.40
   5   6  -1    3.00    1.40
   5   6  -1    6.20    1.80
  -5  -6   1    4.90    1.50
  -5  -6   1    1.60    1.40
  -5  -6   1    0.00    1.30
   5   5  -1    9.30    1.50
   5   5  -1    6.60    1.30
   5   5  -1    3.50    1.40
   5   5  -1   10.90    1.80
  -5  -5   1    7.30    1.60
  -5  -5   1   10.30    1.70
   5   4  -1   15.20    1.70
   5   4  -1   10.70    1.30
   5   4  -1   16.20    1.90
   5   4  -1   14.70    1.60
  -5  -4   1   19.40    1.80
  -5  -4   1   12.90    1.70
  -5  -4   1   13.30    1.70
   5   3  -1   23.10    1.80
   5   3  -1   23.60    1.50
   5   3  -1   14.10    1.60
   5   3  -1   29.50    2.40
  -5  -3   1   14.80    1.60
  -5  -3   1   31.30    2.30
  -5  -3   1   17.80    1.70
   5   2  -1  145.69    7.20
   5   2  -1  152.88    6.70
   5   2  -1  148.69    6.70
  -5  -2   1  149.99    6.70
   5   1  -1   31.20    2.10
   5   1  -1   37.10    2.10
   5   1  -1   38.40    2.50
  -5  -1   1   33.40    2.00
  -5  -1   1   33.80    2.00
   5   0  -1   -0.50    0.80
   5   0  -1   -0.80    0.80
   5   0  -1    0.30    0.80
  -5   0   1    0.10    0.70
  -5   0   1   -1.80    0.80
  -5   0   1    0.40    0.70
   5  -1  -1   43.80    2.20
   5  -1  -1   32.80    2.60
   5  -1  -1   35.10    2.10
  -5   1   1   40.00    2.10
  -5   1   1   37.30    2.10
  -5   1   1   37.70    2.60
   5  -2  -1  146.49    7.90
   5  -2  -1  150.48    6.50
   5  -2  -1  155.28    6.60
  -5   2   1  137.79    6.50
  -5   2   1  150.08    7.80
  -5   2   1  147.59    6.60
   5  -3  -1   19.30    1.70
   5  -3  -1   19.00    2.20
  -5   3   1   16.00    1.40
  -5   3   1   26.00    1.90
   5  -4  -1   13.90    1.50
   5  -4  -1   14.90    2.30
   5  -4  -1   11.00    1.40
  -5   4   1   14.30    1.60
  -5   4   1   13.60    1.90
  -5   4   1   16.30    1.50
   5  -5  -1   14.00    2.30
   5  -5  -1    8.40    1.50
   5  -5  -1    9.90    1.90
   5  -5  -1    2.30    1.20
  -5   5   1    7.40    1.50
  -5   5   1    5.90    1.30
  -5   5   1    9.70    1.90
   5  -6  -1    9.90    2.40
   5  -6  -1    6.90    1.70
   5  -6  -1    4.50    1.40
   5  -6  -1    0.90    1.30
  -5   6   1    5.10    1.50
  -5   6   1    4.30    1.30
  -5   6   1    5.30    1.80
   5  -7  -1   38.60    4.00
   5  -7  -1   37.10    2.40
   5  -7  -1   35.70    3.00
   5  -7  -1   32.80    2.80
  -5   7   1   33.30    2.90
   5  -8  -1    3.30    1.70
   5  -8  -1    4.10    1.80
   5  -8  -1    5.10    1.00
   5  -9  -1    2.50    1.80
   5  -9  -1    3.60    1.90
   5 -10  -1   -2.80    1.90
   5 -10  -1    1.00    2.00
   5 -11  -1    1.80    2.10
   5 -12  -1    3.00    2.30
   5 -13  -1    5.30    2.50
   5 -14  -1    2.70    2.70
   6  13  -1    0.90    3.10
   6  13  -1    4.50    2.90
  -6 -13   1    0.20    2.60
   6  12  -1    3.80    3.10
   6  12  -1    8.40    2.30
   6  12  -1    5.90    2.70
  -6 -12   1    5.60    2.70
   6  11  -1   -0.90    1.90
   6  11  -1   -0.60    2.70
   6  11  -1    2.50    2.50
  -6 -11   1    2.70    2.50
   6  10  -1    3.50    2.30
   6  10  -1    8.00    2.80
   6  10  -1    5.20    1.90
  -6 -10   1    6.10    2.50
   6   9  -1    0.70    1.70
   6   9  -1    1.00    2.40
   6   9  -1    2.80    2.20
  -6  -9   1    1.00    1.90
   6   8  -1   12.90    2.30
   6   8  -1    8.10    2.10
   6   8  -1   19.20    2.80
  -6  -8   1   11.20    2.30
   6   7  -1    2.50    1.50
   6   7  -1    4.90    1.40
   6   7  -1    7.50    2.00
   6   7  -1    9.40    2.20
  -6  -7   1    4.70    1.90
   6   6  -1    2.20    1.40
  -6  -6   1    1.20    0.70
   6   5  -1   12.70    1.80
   6   5  -1    8.50    1.40
   6   5  -1   14.70    2.10
   6   5  -1   14.60    1.70
  -6  -5   1   15.60    1.80
  -6  -5   1   11.40    1.80
  -6  -5   1   14.40    2.00
   6   4  -1    6.60    1.40
   6   4  -1    7.30    1.60
   6   4  -1    4.00    1.40
  -6  -4   1    4.90    1.30
  -6  -4   1    9.50    1.60
   6   3  -1    0.70    1.10
   6   3  -1    2.40    1.30
   6   3  -1    1.10    1.10
  -6  -3   1    1.30    1.10
  -6  -3   1    0.70    1.20
  -6  -3   1    0.80    1.20
   6   2  -1   13.80    1.70
   6   2  -1   11.80    1.30
   6   2  -1    7.50    1.20
  -6  -2   1   10.80    1.30
  -6  -2   1    8.60    1.20
   6   1  -1    2.40    1.30
   6   1  -1    2.50    1.00
   6   1  -1    2.30    1.00
   6   1  -1    1.70    0.70
  -6  -1   1    1.90    0.70
  -6  -1   1    2.30    0.90
   6   0  -1    0.50    0.80
   6   0  -1   -1.40    0.90
   6   0  -1   -0.40    0.80
  -6   0   1   -0.40    0.80
  -6   0   1   -0.60    0.30
   6  -1  -1    4.60    1.00
   6  -1  -1    0.60    1.20
   6  -1  -1    2.30    0.90
  -6   1   1    2.80    1.10
  -6   1   1    3.50    0.90
   6  -2  -1   10.30    1.80
   6  -2  -1   18.10    1.60
   6  -2  -1   11.60    1.30
  -6   2   1   10.70    1.60
  -6   2   1    9.30    1.10
  -6   2   1   11.20    1.20
   6  -3  -1    0.70    1.00
   6  -3  -1    2.40    1.10
   6  -3  -1    0.90    1.60
  -6   3   1    2.10    1.00
  -6   3   1    0.50    1.40
  -6   3   1    1.10    1.00
   6  -4  -1    4.90    1.20
   6  -4  -1    9.40    2.00
   6  -4  -1    3.20    1.10
  -6   4   1    7.70    1.70
  -6   4   1    4.30    1.30
   6  -5  -1   14.70    2.60
   6  -5  -1   12.20    1.60
   6  -5  -1   13.90    1.60
  -6   5   1   13.40    1.70
  -6   5   1   14.10    1.60
  -6   5   1   12.10    2.20
   6  -6  -1   17.80    2.70
   6  -6  -1   14.90    2.30
  -6   6   1   13.60    2.30
  -6   6   1    6.10    1.40
  -6   6   1   12.50    1.80
   6  -7  -1    9.30    2.70
   6  -7  -1    2.30    1.60
   6  -7  -1    6.20    1.60
  -6   7   1    6.40    1.80
   6  -8  -1   18.20    3.30
   6  -8  -1   14.00    2.20
   6  -8  -1   24.40    2.00
  -6   8   1   18.50    2.40
   6  -9  -1    2.20    1.90
   6  -9  -1    2.00    1.90
  -6   9   1   -0.70    2.00
   6 -10  -1    0.50    2.00
   6 -10  -1    4.20    2.00
  -6  10   1    7.60    2.30
   6 -11  -1    2.50    2.20
  -6  11   1    3.40    2.30
   6 -12  -1    4.40    2.40
  -6  12   1    4.00    2.50
   6 -13  -1    2.70    2.40
  -6  13   1    2.40    2.80
   7  13  -1    1.50    3.30
   7  13  -1    2.80    2.80
  -7 -13   1   -1.50    2.60
   7  12  -1    0.60    2.90
   7  12  -1    2.10    2.50
   7  12  -1    2.30    2.30
  -7 -12   1    7.50    2.70
   7  11  -1    3.40    2.80
   7  11  -1    1.50    2.40
  -7 -11   1    1.90    2.60
   7  10  -1    4.60    2.00
   7  10  -1   14.10    3.20
   7  10  -1   12.60    2.80
  -7 -10   1    9.70    2.70
   7   9  -1    2.70    2.10
   7   9  -1    5.20    2.50
   7   9  -1   -0.20    1.60
  -7  -9   1    3.20    2.30
   7   8  -1    8.10    2.50
   7   8  -1    3.50    1.60
   7   8  -1    6.40    2.10
  -7  -8   1    0.80    1.90
   7   7  -1   -1.10    1.70
   7   7  -1    2.50    1.70
   7   7  -1    1.70    1.30
   7   7  -1    3.20    2.10
  -7  -7   1    1.80    1.80
   7   6  -1   26.20    2.60
   7   6  -1   29.30    2.70
   7   6  -1   28.10    2.40
   7   6  -1   39.90    3.60
  -7  -6   1   31.20    2.80
   7   5  -1    5.20    1.00
   7   5  -1    9.50    2.00
   7   5  -1    4.00    1.50
   7   5  -1    4.40    1.50
  -7  -5   1    3.00    1.60
  -7  -5   1    2.80    1.40
  -7  -5   1    8.80    1.80
   7   4  -1   10.00    1.50
   7   4  -1    7.30    1.50
   7   4  -1   13.30    1.90
  -7  -4   1   10.60    1.70
  -7  -4   1    7.20    1.40
  -7  -4   1    6.50    1.50
   7   3  -1   22.50    2.00
   7   3  -1   20.70    2.20
   7   3  -1   19.20    1.90
  -7  -3   1   22.70    2.10
  -7  -3   1   22.40    2.00
   7   2  -1   12.80    1.50
   7   2  -1   16.90    1.60
   7   2  -1   20.60    2.20
  -7  -2   1   16.20    1.70
  -7  -2   1   19.10    1.60
   7   1  -1    1.10    1.00
   7   1  -1    2.60    1.50
   7   1  -1    3.60    1.10
   7   1  -1    0.20    0.80
  -7  -1   1    1.30    1.10
  -7  -1   1    0.70    1.00
   7   0  -1   -3.60    1.00
   7   0  -1    1.30    1.00
   7   0  -1    1.00    1.00
  -7   0   1   -0.50    1.00
  -7   0   1   -0.20    0.90
   7  -1  -1    1.90    1.00
   7  -1  -1    0.90    1.00
   7  -1  -1   -0.20    1.20
  -7   1   1    0.00    1.10
  -7   1   1    2.40    1.00
  -7   1   1   -0.20    1.00
   7  -2  -1   22.30    1.90
   7  -2  -1   11.30    2.10
   7  -2  -1   17.80    1.70
  -7   2   1   17.50    1.50
  -7   2   1   17.50    1.60
   7  -3  -1   22.20    2.60
   7  -3  -1   25.70    2.10
   7  -3  -1   24.90    1.90
  -7   3   1   21.40    1.80
  -7   3   1   21.00    1.90
  -7   3   1   21.80    2.40
   7  -4  -1    8.90    2.10
   7  -4  -1    8.70    1.40
   7  -4  -1    8.50    1.30
  -7   4   1   12.60    1.50
  -7   4   1   10.90    1.40
  -7   4   1    7.90    1.90
   7  -5  -1    6.30    1.40
   7  -5  -1    5.10    1.30
   7  -5  -1    6.80    2.30
  -7   5   1    6.50    1.50
  -7   5   1    6.30    1.30
  -7   5   1    6.70    1.90
   7  -6  -1   29.50    3.50
   7  -6  -1   32.60    2.70
   7  -6  -1   29.00    2.60
  -7   6   1   33.40    2.70
   7  -7  -1    4.40    1.60
   7  -7  -1    3.60    1.60
   7  -7  -1    5.30    2.70
  -7   7   1    4.10    1.70
   7  -8  -1    2.80    2.80
   7  -8  -1    7.40    1.90
   7  -8  -1    6.00    1.80
  -7   8   1    7.90    2.00
   7  -9  -1    3.30    1.10
   7  -9  -1    4.10    1.90
   7  -9  -1    1.70    1.80
  -7   9   1    2.50    2.00
   7 -10  -1    7.20    2.20
   7 -10  -1    7.40    2.20
  -7  10   1    8.50    2.40
   7 -11  -1    2.30    2.10
  -7  11   1    4.40    2.50
   7 -12  -1    3.10    2.20
  -7  12   1    1.50    2.40
   7 -13  -1    1.40    2.50
   8  13  -1    0.70    3.40
   8  13  -1    1.60    2.70
  -8 -13   1    0.50    2.60
   8  12  -1   -1.40    2.50
   8  12  -1   -0.60    3.00
   8  12  -1   -1.10    2.20
  -8 -12   1   -4.60    2.40
   8  11  -1    6.60    2.60
   8  11  -1   10.20    3.40
  -8 -11   1    3.90    2.70
   8  10  -1    3.60    2.90
   8  10  -1    0.40    2.30
  -8 -10   1    0.30    2.20
   8   9  -1    6.30    2.30
   8   9  -1    4.10    1.60
   8   9  -1    8.30    2.80
  -8  -9   1    6.90    2.40
   8   8  -1    1.40    2.00
   8   8  -1    1.80    2.40
   8   8  -1    1.40    1.30
  -8  -8   1   -1.80    2.00
   8   7  -1   19.50    2.00
   8   7  -1    7.30    2.10
   8   7  -1   15.70    2.70
   8   7  -1   12.30    2.20
  -8  -7   1   10.20    2.20
   8   6  -1    1.10    2.00
   8   6  -1   -0.60    1.60
   8   6  -1    2.80    1.70
   8   6  -1    1.40    0.90
  -8  -6   1   -1.60    1.60
   8   5  -1    5.00    2.00
   8   5  -1    4.00    1.50
   8   5  -1    2.00    1.50
  -8  -5   1    2.70    1.60
   8   4  -1    6.20    1.60
   8   4  -1    6.20    1.60
   8   4  -1    9.80    2.00
  -8  -4   1    7.50    1.50
  -8  -4   1    6.30    1.60
   8   3  -1    1.60    1.20
   8   3  -1    7.10    1.70
   8   3  -1    2.80    1.30
  -8  -3   1    1.50    1.20
  -8  -3   1    1.30    1.20
   8   2  -1    3.90    1.70
   8   2  -1    5.00    1.20
   8   2  -1    2.90    1.20
  -8  -2   1    3.60    1.20
  -8  -2   1    4.00    1.20
   8   1  -1    0.70    1.10
   8   1  -1    2.10    0.90
   8   1  -1    1.70    1.00
   8   1  -1    3.70    1.60
  -8  -1   1    1.00    1.10
  -8  -1   1    1.60    1.00
   8   0  -1    1.60    1.00
   8   0  -1    1.20    1.10
   8   0  -1    0.30    1.00
  -8   0   1    3.70    1.00
  -8   0   1   -0.10    1.00
   8  -1  -1    3.00    1.40
   8  -1  -1    1.60    1.00
   8  -1  -1    2.20    1.10
  -8   1   1    2.70    1.00
  -8   1   1    0.80    1.10
  -8   1   1    3.70    1.10
   8  -2  -1    5.90    1.30
   8  -2  -1    4.20    1.10
   8  -2  -1    4.60    1.70
  -8   2   1    4.00    1.10
  -8   2   1    5.00    1.20
  -8   2   1    5.40    1.40
   8  -3  -1    3.90    1.10
   8  -3  -1    5.40    1.80
  -8   3   1    5.00    1.60
  -8   3   1    1.60    1.00
  -8   3   1    2.90    1.10
   8  -4  -1    8.40    2.30
   8  -4  -1    6.80    1.40
  -8   4   1    8.40    1.40
  -8   4   1    5.70    1.20
  -8   4   1    5.60    1.90
   8  -5  -1    9.30    2.40
   8  -5  -1    3.10    1.30
   8  -5  -1    2.10    1.30
  -8   5   1    4.30    1.90
  -8   5   1    2.90    1.40
  -8   5   1    2.90    1.20
   8  -6  -1    0.70    1.30
   8  -6  -1    1.20    2.40
   8  -6  -1    1.70    1.50
  -8   6   1    0.00    1.50
   8  -7  -1   11.10    1.90
   8  -7  -1   16.30    3.20
   8  -7  -1    7.80    1.80
  -8   7   1   13.90    2.00
   8  -8  -1    1.90    1.70
   8  -8  -1    1.10    2.90
   8  -8  -1   -2.20    1.50
  -8   8   1    1.10    1.80
   8  -9  -1    3.40    1.90
   8  -9  -1    4.40    2.00
   8  -9  -1    7.00    1.50
  -8   9   1    3.60    2.10
   8 -10  -1   -0.30    1.90
  -8  10   1    2.70    2.20
   8 -11  -1    5.40    2.20
   8 -12  -1    1.70    2.10
   8 -13  -1    3.50    2.30
   9  12  -1    7.80    2.80
   9  12  -1    7.90    2.80
   9  12  -1    5.50    3.50
  -9 -12   1    7.60    3.10
   9  11  -1    6.10    2.70
   9  11  -1    3.50    3.10
  -9 -11   1    7.10    2.70
   9  10  -1    9.90    3.20
   9  10  -1    3.10    2.40
  -9 -10   1    7.60    2.70
   9   9  -1    2.60    2.60
   9   9  -1    1.60    2.10
  -9  -9   1    5.70    2.40
   9   8  -1   15.50    1.80
   9   8  -1   17.20    3.00
   9   8  -1   15.80    2.60
  -9  -8   1   19.30    2.80
   9   7  -1    6.60    2.50
   9   7  -1    2.10    2.00
   9   7  -1    4.80    1.10
   9   7  -1    7.90    2.10
  -9  -7   1    6.70    2.10
   9   6  -1   13.50    2.20
   9   6  -1   15.70    2.70
   9   6  -1   13.90    2.20
  -9  -6   1   12.20    2.30
   9   5  -1   12.50    2.00
   9   5  -1    6.20    1.80
   9   5  -1   10.60    2.30
  -9  -5   1    5.80    1.90
   9   4  -1    3.40    1.40
   9   4  -1    3.70    1.50
   9   4  -1    4.00    1.90
  -9  -4   1    1.70    1.50
   9   3  -1    1.20    1.30
   9   3  -1    2.50    1.30
   9   3  -1    3.20    1.90
  -9  -3   1    0.90    1.30
  -9  -3   1    1.50    1.20
   9   2  -1    0.60    1.20
   9   2  -1   -0.30    1.60
   9   2  -1    0.40    1.20
  -9  -2   1   -0.20    1.10
  -9  -2   1    0.10    1.20
   9   1  -1    1.10    1.10
   9   1  -1    0.00    1.20
   9   1  -1    1.10    0.90
   9   1  -1    3.20    1.80
  -9  -1   1    0.10    1.10
  -9  -1   1   -1.30    1.10
   9   0  -1    1.50    1.10
   9   0  -1   -0.30    1.20
   9   0  -1    0.70    1.10
  -9   0   1    2.40    1.10
  -9   0   1   -0.30    1.10
   9  -1  -1    0.90    1.10
   9  -1  -1    1.00    1.40
   9  -1  -1    0.20    1.20
  -9   1   1    0.50    1.10
  -9   1   1    0.20    1.10
   9  -2  -1    1.60    1.20
   9  -2  -1    0.50    1.10
   9  -2  -1    1.10    1.60
  -9   2   1   -2.30    1.40
  -9   2   1   -0.20    1.10
  -9   2   1    0.70    1.00
   9  -3  -1    1.70    1.20
   9  -3  -1    0.10    1.80
   9  -3  -1    1.50    1.30
  -9   3   1    1.60    1.60
  -9   3   1    2.10    1.00
  -9   3   1    2.80    1.20
   9  -4  -1    3.50    2.10
   9  -4  -1    4.10    1.30
  -9   4   1    3.80    1.30
  -9   4   1    2.80    1.20
  -9   4   1    1.60    1.80
   9  -5  -1    5.20    1.50
   9  -5  -1    3.00    1.40
   9  -5  -1    5.50    2.50
  -9   5   1    6.40    1.50
   9  -6  -1   12.20    1.80
   9  -6  -1   12.40    1.80
   9  -6  -1   10.90    2.90
  -9   6   1   14.50    2.00
   9  -7  -1    7.80    3.00
   9  -7  -1    5.90    1.70
   9  -7  -1    1.90    1.60
  -9   7   1    3.60    1.80
   9  -8  -1   14.10    2.20
   9  -8  -1   17.60    2.30
  -9   8   1   19.10    2.50
   9  -9  -1    3.50    1.80
  -9   9   1    5.00    2.10
   9 -10  -1    5.50    2.00
   9 -11  -1    4.50    2.20
   9 -12  -1    6.80    2.50
  10  12  -1    1.00    2.80
  10  12  -1   -5.00    3.20
 -10 -12   1    3.70    2.90
  10  11  -1   -5.00    2.40
  10  11  -1   -0.30    3.10
 -10 -11   1    0.80    2.70
  10  10  -1    0.00    2.90
  10  10  -1    3.50    2.60
 -10 -10   1    4.20    2.60
  10   9  -1    1.00    2.20
  10   9  -1    0.60    2.70
 -10  -9   1   -0.80    2.30
  10   8  -1    3.20    2.60
  10   8  -1    1.70    2.10
 -10  -8   1    3.10    2.30
  10   7  -1   -3.20    1.80
  10   7  -1   -1.70    2.20
  10   7  -1   -1.40    1.80
 -10  -7   1    1.30    2.00
  10   6  -1   11.40    2.20
  10   6  -1   11.10    2.60
  10   6  -1    9.20    2.10
 -10  -6   1   10.10    2.30
  10   5  -1   -1.00    1.60
  10   5  -1   -0.40    2.10
  10   5  -1   -1.70    1.60
 -10  -5   1    2.40    1.80
  10   4  -1    8.00    1.80
  10   4  -1    5.30    1.70
  10   4  -1    9.70    2.30
 -10  -4   1    3.40    1.70
  10   3  -1    5.90    2.20
  10   3  -1    9.10    1.70
  10   3  -1    6.90    1.70
 -10  -3   1    8.70    1.70
  10   2  -1    8.80    1.60
  10   2  -1    7.70    2.20
  10   2  -1    7.30    1.50
 -10  -2   1    6.90    1.50
  10   1  -1    0.10    1.20
  10   1  -1    0.80    1.80
  10   1  -1    0.50    1.00
  10   1  -1    0.60    1.20
 -10  -1   1    1.00    1.20
 -10  -1   1   -0.50    1.20
  10   0  -1    1.20    1.30
  10   0  -1    0.50    1.20
  10   0  -1    2.00    1.30
 -10   0   1    1.30    1.10
 -10   0   1   -0.70    1.10
  10  -1  -1    2.40    1.30
  10  -1  -1    0.90    1.50
  10  -1  -1    0.20    1.10
 -10   1   1    1.90    1.20
 -10   1   1   -1.50    1.10
  10  -2  -1    6.60    2.00
  10  -2  -1    6.70    1.40
  10  -2  -1    8.00    1.50
 -10   2   1    7.20    1.40
 -10   2   1    5.90    1.30
 -10   2   1    8.80    1.80
  10  -3  -1    8.30    2.30
  10  -3  -1    6.30    1.60
  10  -3  -1    8.00    1.40
 -10   3   1    9.10    2.10
 -10   3   1    9.70    1.40
 -10   3   1    8.60    1.50
  10  -4  -1    7.40    1.50
  10  -4  -1    9.00    2.50
 -10   4   1    6.50    2.10
 -10   4   1    9.00    1.60
  10  -5  -1   -0.50    1.30
  10  -5  -1    1.10    1.30
  10  -5  -1   -3.10    2.30
 -10   5   1    1.10    1.50
  10  -6  -1   11.10    3.00
  10  -6  -1    8.00    1.80
  10  -6  -1    9.60    1.80
 -10   6   1   10.90    1.80
  10  -7  -1   -0.30    1.50
  10  -7  -1   -3.00    1.50
  10  -7  -1    0.30    2.80
 -10   7   1    0.00    1.60
  10  -8  -1    2.60    1.70
 -10   8   1    2.70    1.90
  10  -9  -1    2.20    1.80
  10 -10  -1    2.40    2.00
  10 -11  -1    0.90    2.10
  10 -12  -1   -1.50    2.20
  11  11  -1    3.50    2.70
  11  11  -1    5.30    3.50
 -11 -11   1    1.40    2.70
  11  10  -1    3.60    3.00
  11  10  -1    1.80    2.40
 -11 -10   1   -1.20    2.40
  11   9  -1    4.40    2.40
  11   9  -1    7.70    3.00
 -11  -9   1    1.40    2.30
  11   8  -1    4.30    2.20
  11   8  -1    4.30    2.80
 -11  -8   1    0.40    2.20
  11   7  -1    7.00    2.70
  11   7  -1    3.80    2.10
  11   7  -1    2.80    2.10
 -11  -7   1    3.30    2.10
  11   6  -1    1.90    1.80
  11   6  -1   -0.50    1.80
  11   6  -1    4.20    2.60
 -11  -6   1    1.50    2.00
  11   5  -1    3.00    1.80
  11   5  -1    5.10    2.50
  11   5  -1    3.40    1.80
 -11  -5   1    1.50    1.80
  11   4  -1    3.50    1.70
  11   4  -1    3.20    2.30
  11   4  -1    2.70    1.60
 -11  -4   1    2.10    1.80
  11   3  -1    0.80    1.50
  11   3  -1    4.30    2.40
  11   3  -1    1.50    1.50
 -11  -3   1    1.60    1.60
  11   2  -1    9.60    1.70
  11   2  -1   11.10    2.50
  11   2  -1   10.10    1.70
 -11  -2   1   11.80    1.80
  11   1  -1    2.60    1.40
  11   1  -1    2.20    1.40
  11   1  -1    4.80    2.20
 -11  -1   1    1.50    1.40
  11   0  -1   -0.40    2.00
  11   0  -1    1.10    1.50
  11   0  -1   -0.40    1.30
  11   0  -1    0.70    1.30
 -11   0   1    0.10    1.30
  11  -1  -1    3.20    1.50
  11  -1  -1    2.00    1.30
  11  -1  -1   -0.80    1.60
 -11   1   1    2.10    1.20
 -11   1   1    3.40    1.30
  11  -2  -1    9.20    2.20
  11  -2  -1    9.80    1.60
  11  -2  -1   10.80    1.80
 -11   2   1    6.90    1.50
  11  -3  -1    3.10    1.40
  11  -3  -1    6.10    1.60
  11  -3  -1    5.20    2.30
 -11   3   1    2.40    1.30
 -11   3   1    0.80    1.90
  11  -4  -1    3.50    2.50
  11  -4  -1    1.80    1.40
 -11   4   1    2.30    1.40
 -11   4   1   -3.60    1.90
  11  -5  -1    2.60    1.50
  11  -5  -1    2.00    1.40
  11  -5  -1   -0.10    2.50
 -11   5   1    3.00    1.50
  11  -6  -1    2.40    1.50
  11  -6  -1    1.00    1.50
  11  -6  -1    3.70    2.90
 -11   6   1    0.40    1.50
  11  -7  -1    4.70    1.70
  11  -8  -1    0.50    1.70
  11  -9  -1    3.20    1.80
  11 -10  -1    0.40    1.80
  11 -11  -1    0.10    2.00
  12  10  -1    3.50    2.50
  12  10  -1    2.30    3.10
  12   9  -1    0.00    2.80
  12   9  -1    1.70    2.30
 -12  -9   1    3.40    2.50
  12   8  -1    5.10    3.00
  12   8  -1   -1.40    2.10
 -12  -8   1   -2.40    2.20
  12   7  -1    0.30    2.00
  12   7  -1    2.10    2.60
 -12  -7   1    1.80    2.20
  12   6  -1   -1.40    2.50
  12   6  -1    1.10    1.90
 -12  -6   1   -0.30    2.00
  12   5  -1    0.50    1.70
  12   5  -1    0.60    2.50
  12   5  -1    0.40    1.80
 -12  -5   1   -0.90    1.80
  12   4  -1    2.40    1.70
  12   4  -1    3.80    1.80
  12   4  -1   -0.30    2.30
 -12  -4   1   -0.70    1.70
  12   3  -1   -1.30    1.40
  12   3  -1    2.70    2.40
  12   3  -1   -1.90    1.50
 -12  -3   1   -0.70    1.60
  12   2  -1   -2.70    2.20
  12   2  -1    0.00    1.60
  12   2  -1    0.60    1.50
 -12  -2   1   -1.00    1.50
  12   1  -1    0.80    2.40
  12   1  -1   -0.40    1.50
  12   1  -1    0.80    1.40
 -12  -1   1    0.20    1.50
  12   0  -1    0.60    2.20
  12   0  -1   -0.20    1.40
  12   0  -1    1.80    1.50
 -12   0   1    0.70    1.40
  12  -1  -1    0.20    1.80
  12  -1  -1    2.90    1.50
  12  -1  -1    2.00    1.40
 -12   1   1    0.40    1.30
  12  -2  -1    1.00    1.30
  12  -2  -1    2.50    1.60
  12  -2  -1   -0.10    2.00
 -12   2   1   -1.10    1.30
  12  -3  -1    1.10    2.20
  12  -3  -1   -0.10    1.30
  12  -3  -1    0.70    1.60
 -12   3   1   -0.70    1.30
  12  -4  -1    1.40    2.40
  12  -4  -1    1.80    1.40
 -12   4   1    0.70    1.40
  12  -5  -1   -0.60    2.50
  12  -5  -1   -0.60    1.40
  12  -6  -1    2.10    1.60
  12  -7  -1    1.20    1.60
  12  -8  -1    0.40    1.70
  12  -9  -1    1.60    1.80
  12 -10  -1    1.50    2.00
  13   9  -1    2.50    2.40
  13   9  -1    2.40    3.20
  13   8  -1    6.90    2.50
  13   8  -1    4.60    3.10
  13   7  -1    3.90    2.90
  13   7  -1   -0.10    2.00
  13   6  -1    8.60    2.30
  13   6  -1   10.50    3.00
  13   5  -1    3.70    2.70
  13   5  -1    4.00    1.90
 -13  -5   1    2.40    2.00
  13   4  -1    5.60    1.90
  13   4  -1    3.70    2.50
 -13  -4   1    2.50    1.90
  13   3  -1    4.20    1.70
  13   3  -1    5.40    2.70
 -13  -3   1    2.00    1.70
  13   2  -1    5.80    1.70
  13   2  -1    4.50    2.60
 -13  -2   1    3.20    1.60
  13   1  -1    0.70    1.40
  13   1  -1    0.70    1.60
  13   1  -1   -0.20    2.50
 -13  -1   1    0.80    1.50
  13   0  -1    0.80    2.40
  13   0  -1    2.10    1.60
  13   0  -1    2.50    1.50
 -13   0   1    0.10    1.40
  13  -1  -1    0.90    1.40
  13  -1  -1    1.20    1.60
 -13   1   1   -0.60    1.40
  13  -2  -1    0.50    1.40
  13  -3  -1    3.90    1.50
  13  -4  -1    4.70    1.50
  13  -5  -1    2.60    1.50
  13  -6  -1   12.50    2.00
  13  -7  -1    1.10    1.60
  13  -8  -1    8.60    2.00
  13  -9  -1    2.60    1.90
  14   8  -1   -2.00    2.30
  14   8  -1    4.40    3.30
  14   7  -1    1.70    3.10
  14   7  -1    0.60    2.20
  14   6  -1    0.30    2.80
  14   6  -1    1.50    2.00
  14   5  -1    4.00    2.90
  14   5  -1   -1.90    1.70
  14   4  -1    0.90    1.70
  14   4  -1    2.00    2.90
  14   3  -1    1.60    2.70
  14   3  -1    0.30    1.60
  14   2  -1    5.10    2.80
  14   2  -1    0.90    1.60
  14   1  -1    1.40    1.50
  14   1  -1   -1.50    2.80
  14   0  -1    2.30    2.60
  14   0  -1    0.40    1.50
  14  -1  -1    1.00    1.50
  14  -1  -1    2.60    2.70
  14  -2  -1   -0.20    1.40
  14  -3  -1    1.80    1.40
  14  -4  -1    1.40    1.50
  14  -5  -1   -1.00    1.40
  14  -6  -1   -0.30    1.50
  14  -7  -1   -3.10    1.50
  14  -8  -1    2.60    1.90
  15   7  -1    2.60    3.20
  15   7  -1    3.60    2.30
  15   6  -1   -0.10    2.00
  15   6  -1    4.30    3.20
  15   5  -1   -1.30    1.80
  15   5  -1    2.80    3.00
  15   4  -1    1.90    3.00
  15   4  -1    1.50    1.90
  15   3  -1    3.80    1.80
  15   3  -1    4.00    3.00
  15   2  -1    2.70    1.70
  15   2  -1    0.40    3.00
  15   1  -1   -0.20    2.60
  15   1  -1    0.80    1.50
  15   0  -1    1.00    1.50
  15   0  -1    0.40    2.70
  15  -1  -1    1.40    1.50
  15  -1  -1    1.90    2.90
  15  -2  -1    1.70    1.50
  15  -3  -1    3.40    1.60
  15  -4  -1    2.40    1.50
  15  -5  -1    0.20    1.50
  15  -6  -1    1.40    1.60
  15  -7  -1   -1.40    1.60
  16   5  -1   -1.80    3.00
  16   5  -1   -4.60    1.90
  16   4  -1    0.70    1.80
  16   4  -1    0.50    3.10
  16   3  -1   -0.30    3.00
  16   3  -1   -1.00    1.70
  16   2  -1    1.70    1.70
  16   2  -1    1.60    3.10
  16   1  -1   -0.90    1.60
  16   1  -1    1.80    3.00
  16   0  -1    1.90    1.60
  16   0  -1    3.70    3.10
  16  -1  -1   -1.20    2.80
  16  -1  -1    0.00    1.50
  16  -2  -1    1.30    1.50
  16  -2  -1    0.20    2.90
  16  -3  -1    1.00    1.60
  16  -4  -1    0.70    1.50
  16  -5  -1    1.40    1.60
  17   2  -1   -2.30    3.20
  17   2  -1    2.80    1.80
  17   1  -1   -2.90    3.30
  17   1  -1   -1.00    1.60
  17   0  -1    1.40    3.30
  17   0  -1    0.60    1.60
  17  -1  -1    1.50    3.10
  17  -1  -1    2.10    1.70
  17  -2  -1    0.80    3.20
  17  -2  -1    0.60    1.60
  16  -3   2    4.30    3.30
  16  -3   2    8.30    1.50
  16  -2   2   19.50    4.00
  16  -2   2   17.20    1.80
  16  -1   2   16.10    3.80
  16  -1   2   17.60    1.90
  16   0   2    9.00    1.70
  16   0   2   11.60    3.60
  16   1   2   18.20    2.10
  16   1   2   18.60    4.10
  16   2   2   18.70    2.20
  16   2   2   16.20    4.00
  16   3   2    6.80    3.30
  16   3   2    5.70    1.90
  16   4   2   27.40    4.50
  16   4   2   24.60    2.80
  15  -6   2   13.90    1.90
  15  -6   2   17.40    4.00
  15  -5   2    5.30    3.20
  15  -5   2    1.30    1.30
  15  -4   2   19.90    3.80
  15  -4   2   23.30    2.20
  15  -3   2    3.20    2.70
  15  -3   2    2.30    1.30
  15  -2   2   38.30    2.70
  15  -2   2   50.49    5.10
  15  -1   2    7.80    1.50
  15  -1   2   13.00    3.40
  15   0   2   11.40    3.50
  15   0   2    9.30    1.60
  15   1   2   13.40    3.50
  15   1   2    9.80    1.70
  15   2   2   39.50    3.10
  15   2   2   45.20    5.00
  15   3   2    3.80    3.10
  15   3   2    2.70    1.70
  15   4   2   21.10    3.90
  15   4   2   21.70    2.60
  15   5   2    1.70    3.20
  15   5   2   -0.40    1.80
  15   6   2    9.40    3.80
  15   6   2   12.00    2.40
  14  -8   2    2.70    1.60
  14  -7   2   10.80    1.80
  14  -7   2    6.60    3.60
  14  -6   2    6.80    1.50
  14  -6   2    5.90    3.30
  14  -5   2   44.40    2.90
  14  -5   2   43.60    5.10
  14  -4   2    1.50    1.20
  14  -4   2    4.90    2.90
  14  -3   2    7.40    2.80
  14  -3   2   16.30    1.70
  14  -2   2   -1.60    2.50
  14  -2   2    0.10    2.10
  14  -2   2    0.90    1.20
  14  -1   2   77.39    5.60
  14  -1   2   79.99    4.10
  14  -1   2   73.19    6.20
  14   0   2   30.70    3.10
  14   0   2   35.80    4.30
  14   0   2   26.10    2.40
  14   1   2   78.89    4.30
  14   1   2   76.09    6.40
  14   2   2    1.70    3.00
  14   2   2    2.30    1.50
  14   3   2   12.00    3.30
  14   3   2   11.20    2.00
  14   4   2    4.30    2.90
  14   4   2    1.50    1.60
  14   5   2   40.10    3.50
  14   5   2   35.40    4.60
  14   6   2   10.20    2.40
  14   6   2   10.00    3.40
  14   7   2   12.00    2.60
  14   7   2    2.90    3.40
  14   8   2    3.60    2.40
  14   8   2    3.70    3.30
  13  -9   2   40.70    3.40
  13  -9   2   35.20    5.60
  13  -8   2   15.90    4.10
  13  -8   2   17.00    2.20
  13  -7   2   43.10    3.10
  13  -7   2   45.70    5.40
  13  -6   2   32.20    4.40
  13  -6   2   34.20    2.60
  13  -5   2   38.80    4.50
  13  -5   2   39.90    2.70
  13  -4   2   42.60    2.80
  13  -4   2   44.20    4.80
  13  -3   2   98.69    6.90
  13  -3   2  105.19    5.00
  13  -2   2   24.10    2.10
  13  -2   2   27.60    3.20
  13  -1   2   53.49    4.60
  13  -1   2   65.89    5.50
  13  -1   2   62.59    3.40
  13   0   2   71.19    5.70
  13   0   2   64.69    3.70
  13   0   2   66.79    4.70
  13   1   2   65.09    5.50
  13   1   2   51.69    4.00
  13   1   2   63.99    3.50
  13   2   2   31.10    2.60
  13   2   2   26.50    2.40
  13   2   2   28.30    3.80
  13   3   2  108.29    7.10
  13   3   2   99.79    5.40
  13   4   2   52.49    4.80
  13   4   2   37.50    3.30
  13   5   2   39.10    4.40
  13   5   2   37.90    3.30
  13   6   2   38.30    4.50
  13   6   2   35.20    3.30
  13   7   2   43.30    4.90
  13   7   2   40.00    3.70
  13   8   2   15.90    3.70
  13   8   2   16.60    3.00
  13   9   2   43.20    4.30
  13   9   2   44.10    5.50
  12 -10   2    3.90    2.00
  12  -9   2   29.10    2.80
  12  -9   2   29.00    5.00
  12  -8   2    8.10    1.80
  12  -8   2    2.80    3.40
  12  -7   2    2.40    1.50
  12  -7   2    3.70    3.10
  12  -6   2   16.60    1.90
  12  -6   2   11.20    3.40
  12  -5   2    6.80    1.40
  12  -5   2   -0.50    2.50
  12  -4   2    7.50    2.70
  12  -4   2    9.40    1.40
 -12   3  -2   25.60    1.80
  12  -3   2   27.40    3.50
  12  -3   2   24.20    2.10
 -12   2  -2   50.89    2.80
 -12   2  -2   51.59    2.70
  12  -2   2   52.79    3.00
  12  -2   2   50.59    4.50
  12  -2   2   48.80    3.20
 -12   1  -2   16.40    1.60
 -12   1  -2   21.70    1.80
  12  -1   2   21.80    2.80
  12  -1   2   21.00    2.00
  12  -1   2   19.30    1.80
  12  -1   2   21.80    3.20
 -12   0  -2    4.30    1.20
  12   0   2    2.20    1.40
  12   0   2    2.80    2.40
  12   0   2    1.00    1.20
  12   0   2    4.40    1.90
 -12  -1  -2   20.40    1.90
  12   1   2   22.50    2.10
  12   1   2   22.10    2.40
  12   1   2   21.20    3.30
  12   1   2   17.40    1.90
 -12  -2  -2   53.69    3.20
  12   2   2   47.00    3.40
  12   2   2   46.20    3.20
  12   2   2   46.90    3.20
  12   2   2   58.69    5.00
 -12  -3  -2   31.50    2.60
  12   3   2   25.60    3.70
  12   3   2   23.30    2.40
  12   3   2   31.20    2.60
 -12  -4  -2    7.70    1.80
  12   4   2   13.90    3.10
  12   4   2   10.20    1.90
 -12  -5  -2    4.90    1.90
  12   5   2    3.30    2.80
  12   5   2    4.50    1.80
  12   6   2   13.70    2.40
  12   6   2   17.70    3.40
  12   7   2    5.30    3.20
  12   7   2    6.40    2.20
  12   8   2    7.70    2.50
  12   8   2    8.70    3.40
  12   9   2   35.10    4.70
  12   9   2   30.60    3.60
  12  10   2   -1.30    3.10
  12  10   2    1.80    2.50
  11 -11   2   37.00    3.50
  11 -10   2   23.10    2.70
  11 -10   2   21.60    4.80
  11  -9   2   65.09    6.70
  11  -9   2   63.79    4.10
  11  -8   2   38.30    3.10
  11  -8   2   39.30    5.10
  11  -7   2  116.19    5.80
  11  -7   2  114.99    8.20
  11  -6   2   59.89    3.50
  11  -6   2   52.09    5.40
 -11   5  -2  163.08    7.60
  11  -5   2  160.18    7.70
  11  -5   2  186.48   10.20
  11  -5   2  167.48    7.70
 -11   4  -2  138.49    6.10
 -11   4  -2  130.79    6.10
  11  -4   2  136.09    6.30
  11  -4   2  131.69    8.40
  11  -4   2  135.99    6.30
 -11   3  -2  155.38    7.10
 -11   3  -2  158.98    7.10
  11  -3   2  172.88    9.50
  11  -3   2  155.78    7.20
 -11   2  -2  111.39    5.10
 -11   2  -2  116.59    5.10
  11  -2   2   97.09    6.80
  11  -2   2  105.39    5.30
  11  -2   2  117.29    5.20
 -11   1  -2  172.28    7.70
 -11   1  -2  174.98    7.70
  11  -1   2  182.68    9.70
  11  -1   2  168.48    7.80
  11  -1   2  176.88    7.90
 -11   0  -2  120.39    5.30
 -11   0  -2  116.39    5.30
  11   0   2  109.59    5.50
  11   0   2  107.59    6.60
  11   0   2  115.79    5.40
  11   0   2  103.79    6.90
 -11  -1  -2  170.08    7.80
 -11  -1  -2  174.88    7.80
  11   1   2  178.58    9.20
  11   1   2  167.38    7.90
  11   1   2  175.78    9.40
  11   1   2  173.18    7.90
 -11  -2  -2  114.89    5.50
  11   2   2  107.59    7.00
  11   2   2  105.69    6.10
  11   2   2  109.09    5.50
  11   2   2  118.09    5.50
 -11  -3  -2  154.78    7.70
  11   3   2  162.78    7.70
  11   3   2  167.48    8.40
  11   3   2  153.78    7.60
  11   3   2  174.28    9.00
 -11  -4  -2  136.69    6.60
  11   4   2  141.49    6.70
  11   4   2  126.19    6.50
  11   4   2  120.39    7.80
 -11  -5  -2  168.78    8.30
  11   5   2  178.08    8.20
  11   5   2  174.88    9.40
  11   5   2  155.28    8.10
 -11  -6  -2   56.19    4.10
  11   6   2   56.09    5.00
  11   6   2   58.59    4.10
 -11  -7  -2  116.29    6.50
  11   7   2  112.99    7.50
  11   7   2  119.29    6.50
 -11  -8  -2   34.80    3.70
  11   8   2   34.20    4.30
  11   8   2   45.90    3.90
 -11  -9  -2   66.19    5.20
  11   9   2   69.49    6.30
  11   9   2   71.19    5.20
  11  10   2   14.30    4.00
  11  10   2   26.50    3.60
  11  11   2   36.80    4.80
  11  11   2   38.60    5.20
  11  11   2   37.90    4.20
  10 -11   2    0.50    2.00
  10 -10   2    4.00    2.00
  10 -10   2    4.80    3.70
  10  -9   2   -0.70    1.60
  10  -9   2    0.80    3.20
  10  -8   2   21.90    4.00
  10  -8   2   19.80    2.20
 -10   7  -2   -2.30    1.50
  10  -7   2   -0.90    2.70
  10  -7   2   -1.70    1.30
 -10   6  -2    1.00    1.30
  10  -6   2    1.70    1.40
  10  -6   2    4.70    1.40
  10  -6   2    0.70    2.60
 -10   5  -2  115.69    5.60
  10  -5   2  117.59    5.60
  10  -5   2  121.79    7.70
  10  -5   2  115.89    5.60
 -10   4  -2   31.60    2.30
 -10   4  -2   39.10    2.30
  10  -4   2   35.10    2.40
  10  -4   2   37.90    4.00
  10  -4   2   40.30    2.50
 -10   3  -2   10.50    1.20
 -10   3  -2   12.80    1.30
  10  -3   2   12.10    1.40
  10  -3   2    8.20    2.50
 -10   2  -2   65.19    3.30
 -10   2  -2   63.49    3.30
  10  -2   2   65.59    3.40
  10  -2   2   73.49    3.60
  10  -2   2   70.09    4.90
 -10   1  -2   -0.50    0.90
 -10   1  -2    0.70    0.90
  10  -1   2   -0.30    1.60
  10  -1   2    0.60    1.10
  10  -1   2   -0.20    1.00
 -10   0  -2   15.30    1.40
 -10   0  -2   13.60    1.40
  10   0   2   15.50    1.60
  10   0   2   17.70    2.70
  10   0   2   15.90    2.00
  10   0   2   10.60    1.40
 -10  -1  -2   -0.20    1.00
 -10  -1  -2   -0.90    1.10
  10   1   2   -0.80    1.10
  10   1   2   -0.90    1.20
  10   1   2    0.90    2.00
  10   1   2   -0.60    1.10
 -10  -2  -2   58.29    3.60
 -10  -2  -2   67.49    3.60
  10   2   2   78.89    5.20
  10   2   2   73.39    4.00
  10   2   2   75.39    3.70
  10   2   2   58.39    3.60
 -10  -3  -2    9.60    1.70
  10   3   2   10.70    1.80
  10   3   2   12.20    1.70
  10   3   2    8.50    2.40
  10   3   2   12.80    1.40
 -10  -4  -2   37.60    2.90
  10   4   2   39.10    2.90
  10   4   2   32.40    2.90
  10   4   2   32.90    2.30
  10   4   2   40.00    3.80
 -10  -5  -2  116.99    6.30
  10   5   2  113.89    6.20
  10   5   2  126.89    6.20
  10   5   2  122.39    7.40
 -10  -6  -2    2.40    1.80
  10   6   2    0.20    2.30
  10   6   2    2.30    1.10
  10   6   2    1.20    1.80
  10   6   2    1.40    1.80
 -10  -7  -2    0.10    1.90
  10   7   2    1.90    2.00
  10   7   2    0.50    2.50
  10   7   2   -0.50    1.80
 -10  -8  -2   21.30    3.00
  10   8   2   20.90    2.90
  10   8   2   18.30    3.60
 -10  -9  -2    1.80    2.20
  10   9   2    3.00    2.80
  10   9   2   -1.30    2.10
 -10 -10  -2    2.50    2.50
  10  10   2    5.80    3.40
  10  10   2    1.60    2.30
 -10 -11  -2    3.40    2.70
  10  11   2    3.80    2.90
  10  11   2   -0.70    3.20
  10  11   2    1.30    2.50
   9 -12   2   55.09    4.50
   9 -11   2   12.70    4.10
   9 -11   2   11.00    2.40
   9 -10   2   98.89    5.60
   9 -10   2   98.09    8.00
   9  -9   2   29.30    2.80
   9  -9   2   24.70    4.40
  -9   8  -2  170.98    8.10
   9  -8   2  168.78    8.00
   9  -8   2  163.88   10.50
  -9   7  -2   12.70    2.00
   9  -7   2   15.40    2.00
   9  -7   2   19.10    2.10
   9  -7   2   10.90    3.40
  -9   6  -2  249.08   11.10
   9  -6   2  253.67   11.20
   9  -6   2  240.88   11.10
   9  -6   2  258.17   14.00
  -9   5  -2   69.19    3.60
  -9   5  -2   65.29    3.60
   9  -5   2   70.59    3.70
   9  -5   2   73.99    3.70
   9  -5   2   59.19    5.40
  -9   4  -2  206.68    9.40
  -9   4  -2  221.38   11.70
  -9   4  -2  218.18    9.40
   9  -4   2  209.18    9.40
   9  -4   2  223.78   11.90
   9  -4   2  209.78    9.40
  -9   3  -2   38.00    2.10
  -9   3  -2   32.80    2.20
   9  -3   2   35.60    3.50
   9  -3   2   35.30    2.20
  -9   2  -2  222.68    9.90
  -9   2  -2  233.38    9.90
   9  -2   2  227.08   10.00
   9  -2   2  236.98   12.30
   9  -2   2  231.38   10.10
  -9   1  -2   12.30    1.20
  -9   1  -2    8.70    1.10
   9  -1   2   12.60    1.90
   9  -1   2    8.30    1.20
   9  -1   2   10.40    1.20
  -9   0  -2  309.77   13.60
  -9   0  -2  333.47   13.60
   9   0   2  310.27   14.90
   9   0   2  309.97   13.60
   9   0   2  307.07   13.60
   9   0   2  324.57   16.10
  -9  -1  -2   10.60    1.30
  -9  -1  -2   11.60    1.30
   9   1   2    9.00    1.30
   9   1   2   10.70    2.20
   9   1   2    9.40    1.30
   9   1   2   10.00    1.50
  -9  -2  -2  227.38   10.10
  -9  -2  -2  228.58   10.10
   9   2   2  224.38   11.60
   9   2   2  226.08   10.10
   9   2   2  235.68   11.30
   9   2   2  230.98   10.10
  -9  -3  -2   30.90    2.50
  -9  -3  -2   38.30    2.50
   9   3   2   35.80    2.50
   9   3   2   35.60    3.40
   9   3   2   31.30    2.30
   9   3   2   33.20    2.50
  -9  -4  -2  210.28    9.90
   9   4   2  217.38    9.90
   9   4   2  219.18    9.90
   9   4   2  220.88   11.00
  -9  -5  -2   62.89    4.10
   9   5   2   68.69    4.00
   9   5   2   67.79    4.00
   9   5   2   60.19    5.10
  -9  -6  -2  259.37   11.90
   9   6   2  256.57   13.10
   9   6   2  250.57   12.90
   9   6   2  258.57   11.80
   9   6   2  259.97   11.90
  -9  -7  -2   11.50    2.40
   9   7   2   13.40    3.10
   9   7   2   15.90    2.40
   9   7   2   14.00    2.40
   9   7   2   14.80    1.90
  -9  -8  -2  181.98    9.10
   9   8   2  178.68   10.00
   9   8   2  178.48    9.00
   9   8   2  182.68   10.00
   9   8   2  190.28    9.10
  -9  -9  -2   31.30    3.50
   9   9   2   31.10    3.40
   9   9   2   31.40    4.10
  -9 -10  -2  101.49    6.50
   9  10   2  101.89    7.30
   9  10   2  101.89    6.30
  -9 -11  -2   12.40    3.10
   9  11   2   11.70    3.10
   9  11   2   15.60    3.00
   9  11   2    8.30    3.50
  -9 -12  -2   64.69    5.70
   9  12   2   61.59    6.20
   9  12   2   59.09    5.90
   9  12   2   77.79    5.50
   8 -12   2    0.40    2.10
   8 -11   2   -2.30    3.40
   8 -11   2    1.30    2.00
   8 -10   2   11.10    3.60
   8 -10   2   13.10    2.30
  -8   9  -2    2.60    1.90
   8  -9   2   -0.70    2.90
   8  -9   2    1.70    1.70
  -8   8  -2   23.90    2.60
   8  -8   2   27.00    4.10
   8  -8   2   26.90    2.60
   8  -8   2   25.50    2.60
  -8   7  -2   53.99    3.50
   8  -7   2   49.40    3.40
   8  -7   2   57.19    5.40
   8  -7   2   48.20    3.40
  -8   6  -2    9.80    1.70
   8  -6   2   11.40    2.80
   8  -6   2   10.90    1.60
   8  -6   2    7.70    1.50
  -8   5  -2   94.89    4.60
  -8   5  -2   96.29    4.60
   8  -5   2   81.49    4.60
   8  -5   2  112.19    6.60
   8  -5   2   93.89    4.60
  -8   4  -2    1.90    1.00
  -8   4  -2    1.50    1.70
  -8   4  -2    1.40    0.90
   8  -4   2    1.30    1.00
   8  -4   2    2.60    2.00
   8  -4   2    2.50    0.90
  -8   3  -2   17.90    1.50
  -8   3  -2   15.90    2.20
  -8   3  -2   12.70    1.20
   8  -3   2   17.50    1.50
   8  -3   2   16.60    2.30
  -8   2  -2    0.90    0.80
  -8   2  -2    1.70    0.70
   8  -2   2    2.30    1.00
   8  -2   2    1.10    0.80
   8  -2   2    1.30    1.50
  -8   1  -2   22.20    1.60
  -8   1  -2   27.80    1.60
   8  -1   2   20.30    1.70
   8  -1   2   29.20    2.60
  -8   0  -2   77.59    3.50
  -8   0  -2   69.19    3.50
   8   0   2   75.09    3.60
   8   0   2   71.79    3.60
   8   0   2   72.99    4.40
   8   0   2   78.09    4.60
  -8  -1  -2   30.80    2.00
   8   1   2   33.10    2.10
   8   1   2   30.20    2.40
   8   1   2   38.80    3.30
  -8  -2  -2    3.40    1.00
  -8  -2  -2    0.40    1.00
   8   2   2    2.00    1.00
   8   2   2    5.20    1.90
   8   2   2    1.20    0.90
   8   2   2    1.00    1.00
  -8  -3  -2   11.90    1.50
  -8  -3  -2   13.80    1.60
   8   3   2   17.50    1.60
   8   3   2   12.00    2.20
   8   3   2    9.10    1.50
  -8  -4  -2    2.50    1.20
  -8  -4  -2    3.10    1.40
   8   4   2   -0.40    1.80
   8   4   2    0.50    1.30
   8   4   2    2.80    1.30
  -8  -5  -2   89.29    5.10
   8   5   2   83.59    5.10
   8   5   2  109.89    6.10
   8   5   2  106.99    5.10
  -8  -6  -2   11.80    2.10
   8   6   2    6.40    2.20
   8   6   2    4.90    1.80
   8   6   2   12.00    1.60
   8   6   2   13.40    2.00
  -8  -7  -2   52.09    4.10
   8   7   2   55.49    5.00
   8   7   2   57.89    3.80
   8   7   2   48.60    4.00
   8   7   2   53.59    3.90
  -8  -8  -2   28.50    3.20
   8   8   2   26.20    2.70
   8   8   2   24.90    2.90
   8   8   2   23.20    3.40
   8   8   2   27.50    3.10
  -8  -9  -2   -1.00    2.10
   8   9   2   -0.10    2.10
   8   9   2   -1.00    2.60
   8   9   2    1.40    1.80
  -8 -10  -2   10.50    2.80
   8  10   2   12.30    3.20
   8  10   2   12.80    2.90
   8  10   2    6.80    2.60
  -8 -11  -2    1.30    2.40
   8  11   2   -0.50    3.10
   8  11   2    1.90    2.30
   8  11   2    0.80    2.30
  -8 -12  -2   -1.00    2.50
   8  12   2    1.20    2.60
   8  12   2    0.30    3.30
   8  12   2    1.40    2.60
   7 -13   2   71.29    5.30
   7 -12   2    0.30    2.10
   7 -11   2  143.39    9.60
   7 -11   2  123.29    7.00
  -7  10  -2    4.60    2.10
   7 -10   2    2.90    1.90
   7 -10   2   -0.10    2.90
  -7   9  -2  210.88   10.20
   7  -9   2  210.58   10.10
   7  -9   2  220.98   12.80
   7  -9   2  220.48   10.20
  -7   8  -2   -0.10    1.70
   7  -8   2    2.30    1.60
   7  -8   2    0.20    1.60
   7  -8   2    2.20    2.80
  -7   7  -2  176.08    8.20
   7  -7   2  188.88    8.30
   7  -7   2  168.08    8.20
   7  -7   2  167.48   10.40
  -7   6  -2    1.40    1.20
  -7   6  -2    3.30    1.40
   7  -6   2    5.10    1.40
   7  -6   2    3.70    2.40
   7  -6   2    4.20    1.40
  -7   5  -2  179.98    7.60
  -7   5  -2  159.98    7.60
  -7   5  -2  164.58    9.50
   7  -5   2  178.88    7.70
   7  -5   2  167.58    9.70
   7  -5   2  162.88    7.60
  -7   4  -2    1.60    1.00
  -7   4  -2    0.70    0.80
  -7   4  -2    2.00    1.60
   7  -4   2    1.50    1.00
   7  -4   2    2.10    1.90
   7  -4   2    2.10    0.90
  -7   3  -2  474.45   23.30
  -7   3  -2  439.66   19.50
  -7   3  -2  473.75   19.50
   7  -3   2  445.96   23.30
   7  -3   2  457.75   19.50
   7  -3   2  466.05   19.50
  -7   2  -2    4.70    0.80
   7  -2   2    4.00    0.90
   7  -2   2    4.50    0.90
   7  -2   2    5.10    1.50
  -7   1  -2 1063.99   45.80
   7  -1   2 1111.89   53.89
   7  -1   2 1085.69   45.80
   7  -1   2 1106.09   45.90
  -7   0  -2   51.89    2.70
   7   0   2   57.89    2.80
   7   0   2   56.09    3.50
   7   0   2   53.69    2.80
  -7  -1  -2 1143.89   45.80
  -7  -1  -2 1076.19   45.80
   7   1   2 1070.49   53.49
   7   1   2 1104.99   48.40
   7   1   2 1076.89   45.80
   7   1   2 1060.49   45.80
  -7  -2  -2    3.70    1.00
  -7  -2  -2    2.60    1.00
   7   2   2    2.80    1.10
   7   2   2    4.10    1.10
   7   2   2    7.20    1.70
  -7  -3  -2  456.65   19.50
  -7  -3  -2  464.85   19.50
   7   3   2  463.55   19.50
   7   3   2  457.15   19.50
   7   3   2  429.36   20.70
  -7  -4  -2   -0.30    1.10
  -7  -4  -2    0.60    1.40
  -7  -4  -2   -0.30    1.20
   7   4   2    1.10    1.70
   7   4   2    1.20    1.20
   7   4   2    0.40    1.10
  -7  -5  -2  180.28    8.00
  -7  -5  -2  168.48    8.00
   7   5   2  162.38    8.70
   7   5   2  169.78    8.00
   7   5   2  171.58    8.00
  -7  -6  -2    3.10    1.70
   7   6   2    4.10    1.40
   7   6   2    4.30    2.00
   7   6   2    3.10    1.60
   7   6   2    6.90    1.70
  -7  -7  -2  186.48    8.80
   7   7   2  171.68    8.60
   7   7   2  175.38    9.50
   7   7   2  164.88    9.30
   7   7   2  192.98    8.70
  -7  -8  -2   -0.40    1.90
   7   8   2    2.10    2.00
   7   8   2    1.20    2.40
   7   8   2   -0.40    1.50
   7   8   2    2.60    1.90
  -7  -9  -2  224.38   10.80
   7   9   2  213.68   11.60
   7   9   2  227.68   10.80
   7   9   2  222.88   12.00
  -7 -10  -2    0.90    2.30
   7  10   2    5.10    2.50
   7  10   2    0.30    2.20
   7  10   2   -0.90    1.80
   7  10   2    3.50    2.80
  -7 -11  -2  129.79    7.50
   7  11   2  134.59    7.40
   7  11   2  122.99    8.30
   7  11   2  120.79    7.70
  -7 -12  -2    4.60    2.80
   7  12   2   -0.10    2.50
   7  12   2   -1.10    3.10
   7  12   2    0.80    2.40
  -7 -13  -2   69.99    5.90
   7  13   2   65.69    5.90
   7  13   2   78.89    6.20
   7  13   2   74.89    6.70
   6 -13   2   -1.50    2.20
   6 -12   2   72.39    5.00
   6 -11   2   27.00    3.10
   6 -11   2   21.80    4.30
   6 -10   2   -2.00    2.90
   6 -10   2    0.40    1.80
   6 -10   2   -1.10    1.70
   6  -9   2    0.90    2.90
   6  -9   2    2.70    1.80
   6  -9   2    4.70    1.90
  -6   8  -2  144.69    7.30
   6  -8   2  149.69    7.30
   6  -8   2  152.88    9.30
   6  -8   2  144.89    7.20
  -6   7  -2   62.49    4.10
   6  -7   2   70.39    4.00
   6  -7   2   77.89    4.00
   6  -7   2   60.69    5.60
  -6   6  -2  270.07   12.00
  -6   6  -2  274.97   12.00
   6  -6   2  254.97   12.00
   6  -6   2  287.57   14.80
   6  -6   2  263.77   12.00
   6  -6   2  286.77   13.10
  -6   5  -2  142.09    8.40
  -6   5  -2  159.88    6.90
  -6   5  -2  146.89    6.90
   6  -5   2  148.29    6.90
   6  -5   2  146.99    8.70
   6  -5   2  157.48    6.90
  -6   4  -2   87.99    3.80
  -6   4  -2   67.49    3.70
  -6   4  -2   87.29    5.00
   6  -4   2   88.49    5.20
   6  -4   2   76.99    3.80
   6  -4   2   61.39    3.70
  -6   3  -2   72.99    3.50
  -6   3  -2   73.29    4.60
  -6   3  -2   73.29    3.40
   6  -3   2   69.99    4.80
   6  -3   2   74.29    3.50
   6  -3   2   77.89    3.50
  -6   2  -2  783.32   31.70
  -6   2  -2  683.03   31.70
   6  -2   2  752.82   31.80
   6  -2   2  801.62   37.50
   6  -2   2  755.72   31.70
  -6   1  -2  193.58    8.10
  -6   1  -2  186.28    8.10
   6  -1   2  181.08    9.80
   6  -1   2  184.38    8.10
   6  -1   2  197.58    8.10
  -6   0  -2  143.09    5.80
  -6   0  -2  115.79    5.80
   6   0   2  112.79    5.80
   6   0   2  141.99    7.00
   6   0   2  155.58    5.90
  -6  -1  -2  193.68    8.30
   6   1   2  187.08    8.30
   6   1   2  195.98    8.30
   6   1   2  182.78    9.10
  -6  -2  -2  728.93   29.80
  -6  -2  -2  682.13   29.80
   6   2   2  730.53   29.80
   6   2   2  676.93   29.80
  -6  -3  -2   68.99    3.80
  -6  -3  -2   78.39    3.70
   6   3   2   74.19    3.70
   6   3   2   77.99    3.80
   6   3   2   64.19    4.40
  -6  -4  -2   63.79    4.00
  -6  -4  -2   71.59    3.90
  -6  -4  -2   88.89    4.50
   6   4   2   63.09    3.90
   6   4   2   81.39    4.00
   6   4   2   86.99    4.70
  -6  -5  -2  149.99    7.20
  -6  -5  -2  145.39    7.60
  -6  -5  -2  153.48    7.00
   6   5   2  139.59    7.70
   6   5   2  152.28    7.10
   6   5   2  152.78    7.10
  -6  -6  -2  251.47   12.20
   6   6   2  278.77   12.20
   6   6   2  286.37   13.90
   6   6   2  281.87   13.10
   6   6   2  255.77   12.20
  -6  -7  -2   71.79    4.40
   6   7   2   74.09    4.40
   6   7   2   60.69    4.40
   6   7   2   65.49    4.90
   6   7   2   70.59    4.20
  -6  -8  -2  151.58    7.80
   6   8   2  154.08    8.60
   6   8   2  157.08    8.50
   6   8   2  157.18    7.80
   6   8   2  151.08    7.80
  -6  -9  -2    4.70    2.30
   6   9   2    2.60    2.60
   6   9   2    6.40    2.00
   6   9   2    4.50    2.30
   6   9   2    2.80    2.20
  -6 -10  -2   -3.90    2.10
   6  10   2    0.20    2.60
   6  10   2   -0.50    2.10
   6  10   2   -0.90    2.00
   6  10   2   -2.50    1.80
  -6 -11  -2   25.60    3.50
   6  11   2   21.20    3.10
   6  11   2   21.40    3.80
   6  11   2   25.60    3.50
  -6 -12  -2   74.19    5.60
   6  12   2   76.59    6.60
   6  12   2   72.59    5.60
   6  12   2   72.59    5.60
  -6 -13  -2    2.40    2.80
   6  13   2    1.70    2.70
   6  13   2    0.50    2.30
   6  13   2   -1.60    3.10
   5 -14   2   30.20    3.80
   5 -13   2   14.70    2.90
   5 -12   2   56.19    4.60
  -5  11  -2    8.40    2.20
   5 -11   2    7.10    2.50
   5 -11   2    7.30    3.50
   5 -11   2    5.20    2.20
  -5  10  -2  126.39    6.40
   5 -10   2  119.19    6.30
   5 -10   2  105.59    8.20
   5 -10   2  110.69    6.40
  -5   9  -2    1.50    1.80
   5  -9   2    4.60    1.90
   5  -9   2    8.00    2.10
   5  -9   2    5.40    2.90
   5  -8   2  276.77   11.80
   5  -8   2  246.68   14.30
   5  -8   2  251.67   11.70
   5  -7   2   49.00    3.80
   5  -7   2   44.90    4.60
   5  -7   2   40.40    3.10
   5  -7   2   44.80    3.00
  -5   6  -2  347.87   14.40
  -5   6  -2  328.37   17.20
   5  -6   2  322.87   17.30
   5  -6   2  310.47   14.30
   5  -6   2  332.37   14.40
   5  -6   2  332.17   15.40
  -5   5  -2  154.48    6.90
  -5   5  -2  155.98    8.50
  -5   5  -2  149.39    7.00
   5  -5   2  152.08    8.60
   5  -5   2  148.99    6.90
   5  -5   2  148.49    6.90
  -5   4  -2  276.07   14.60
  -5   4  -2  291.97   12.20
  -5   4  -2  276.87   12.20
   5  -4   2  287.87   12.20
   5  -4   2  281.67   12.20
   5  -4   2  278.77   14.70
  -5   3  -2  163.08    7.30
  -5   3  -2  180.48    9.00
   5  -3   2  166.78    7.30
   5  -3   2  159.08    7.30
   5  -3   2  170.58    9.10
  -5   2  -2  492.05   19.40
  -5   2  -2  459.75   19.40
  -5   2  -2  390.96   23.00
   5  -2   2  486.45   23.10
   5  -2   2  473.15   19.40
  -5   1  -2   26.60    1.60
  -5   1  -2   29.70    1.60
   5  -1   2   37.80    1.70
   5  -1   2   37.70    2.50
   5  -1   2   28.40    1.60
  -5   0  -2 1209.78   50.79
  -5   0  -2 1227.58   50.79
   5   0   2 1249.97   50.79
   5   0   2 1172.08   50.79
   5   0   2 1209.08   59.59
  -5  -1  -2   34.20    1.80
  -5  -1  -2   25.70    1.80
   5   1   2   24.60    1.80
   5   1   2   43.20    2.60
   5   1   2   36.80    1.80
  -5  -2  -2  476.65   20.10
   5   2   2  480.55   20.10
   5   2   2  465.15   21.30
   5   2   2  472.15   20.10
  -5  -3  -2  151.18    7.30
  -5  -3  -2  168.88    7.30
   5   3   2  159.68    7.30
   5   3   2  166.28    7.30
   5   3   2  163.18    7.90
  -5  -4  -2  269.37   12.90
  -5  -4  -2  275.07   12.20
  -5  -4  -2  297.87   12.20
   5   4   2  290.17   12.20
   5   4   2  262.77   13.00
   5   4   2  273.27   12.20
  -5  -5  -2  151.28    7.30
  -5  -5  -2  164.68    7.20
  -5  -5  -2  156.48    7.70
   5   5   2  137.69    7.20
   5   5   2  156.38    7.20
   5   5   2  155.18    7.80
  -5  -6  -2  319.87   14.40
  -5  -6  -2  335.57   14.30
  -5  -6  -2  311.47   15.10
   5   6   2  314.27   15.20
   5   6   2  339.67   14.40
   5   6   2  320.47   14.40
   5   6   2  320.27   16.40
  -5  -7  -2   49.40    3.60
   5   7   2   49.70    3.60
   5   7   2   47.60    3.50
   5   7   2   43.70    3.50
   5   7   2   47.40    4.20
  -5  -8  -2  254.57   12.00
   5   8   2  277.47   12.10
   5   8   2  235.88   12.80
   5   8   2  265.17   12.00
   5   8   2  261.67   13.70
  -5  -9  -2    4.40    2.20
   5   9   2    7.50    2.20
   5   9   2    2.90    2.10
   5   9   2    5.50    2.30
   5   9   2    6.20    2.70
  -5 -10  -2  109.99    6.40
   5  10   2  109.79    6.60
   5  10   2  110.09    7.20
   5  10   2  109.49    6.40
  -5 -11  -2   10.80    2.80
   5  11   2    9.30    2.70
   5  11   2    9.30    2.40
   5  11   2    4.40    3.00
  -5 -12  -2   56.09    4.90
   5  12   2   51.39    5.10
   5  12   2   53.59    4.90
   5  12   2   46.10    4.50
  -5 -13  -2   17.50    3.60
   5  13   2   10.00    3.60
   5  13   2   19.70    3.50
  -5 -14  -2   41.10    4.80
   5  14   2   40.70    4.60
   5  14   2   32.70    5.00
   4 -14   2    2.90    2.60
  -4  13  -2   97.89    6.20
   4 -13   2   92.69    6.00
  -4  12  -2   -1.50    2.10
   4 -12   2    2.40    2.20
  -4  11  -2   87.59    5.30
   4 -11   2   85.69    7.20
   4 -11   2   89.69    5.40
  -4  10  -2   -0.40    1.90
   4 -10   2    0.20    1.80
   4 -10   2   -1.10    2.80
   4 -10   2   -0.60    1.90
  -4   9  -2  162.48    7.90
   4  -9   2  153.98    9.70
   4  -9   2  153.78    7.90
   4  -9   2  165.18    7.90
  -4   8  -2    1.50    1.60
   4  -8   2    4.70    2.50
   4  -8   2    1.40    1.60
   4  -8   2    2.40    1.70
  -4   7  -2  674.83   28.20
  -4   7  -2  651.83   28.20
   4  -7   2  674.83   29.80
   4  -7   2  659.93   28.30
   4  -7   2  632.74   28.20
   4  -7   2  658.73   33.40
  -4   6  -2    7.80    1.90
  -4   6  -2    2.40    1.30
  -4   6  -2    4.70    1.30
   4  -6   2    4.60    1.40
   4  -6   2    7.20    1.70
   4  -6   2    5.80    2.30
   4  -6   2    4.80    1.40
  -4   5  -2   73.49    4.00
  -4   5  -2   79.09    4.10
  -4   5  -2   89.69    5.20
   4  -5   2   93.89    4.80
   4  -5   2   86.99    5.40
   4  -5   2   75.09    4.10
   4  -5   2   79.09    4.10
  -4   4  -2    7.10    1.50
  -4   4  -2    2.80    1.00
   4  -4   2    4.80    1.70
   4  -4   2    1.40    1.00
   4  -4   2    3.20    1.00
  -4   3  -2  620.34   26.30
  -4   3  -2  648.94   26.30
   4  -3   2  580.94   26.30
   4  -3   2  616.74   26.30
   4  -3   2  656.33   31.20
   4  -2   2   -0.30    0.60
  -4   1  -2 1041.80   46.20
  -4   1  -2 1114.19   46.20
   4  -1   2 1072.29   46.20
   4  -1   2 1131.29   46.20
   4  -1   2 1162.48   54.29
  -4  -1  -2  981.40   44.20
  -4  -1  -2 1051.69   44.10
   4   1   2  998.50   44.20
   4   1   2 1086.99   44.20
   4   1   2 1147.29   46.50
  -4  -2  -2    4.40    0.90
   4   2   2    2.50    0.90
  -4  -3  -2  585.24   25.50
   4   3   2  609.24   25.50
   4   3   2  558.94   25.50
   4   3   2  654.63   26.90
  -4  -4  -2    4.90    1.20
  -4  -4  -2    2.20    1.20
  -4  -4  -2    8.30    1.40
   4   4   2    7.00    1.60
   4   4   2    1.50    1.10
   4   4   2    3.30    1.20
  -4  -5  -2   73.99    4.20
  -4  -5  -2   85.09    4.60
  -4  -5  -2   78.79    4.30
   4   5   2   87.69    4.70
   4   5   2   81.39    4.20
   4   5   2   72.59    4.20
  -4  -6  -2    3.60    1.60
  -4  -6  -2    8.60    1.80
   4   6   2    8.50    1.90
   4   6   2    3.10    1.60
   4   6   2    4.10    1.50
   4   6   2    3.60    1.40
  -4  -7  -2  655.03   28.30
  -4  -7  -2  640.14   29.70
   4   7   2  661.13   32.80
   4   7   2  664.03   28.30
   4   7   2  666.73   28.30
   4   7   2  649.14   29.70
  -4  -8  -2    0.30    1.80
   4   8   2    3.00    1.80
   4   8   2    1.70    2.00
   4   8   2    5.90    2.30
   4   8   2    1.80    1.70
   4   8   2    4.60    1.90
  -4  -9  -2  162.28    8.20
   4   9   2  154.68    8.80
   4   9   2  157.58    8.50
   4   9   2  163.38    9.20
   4   9   2  164.78    8.20
  -4 -10  -2   -2.20    2.10
   4  10   2   -2.80    1.80
   4  10   2    1.70    1.90
   4  10   2    1.70    2.50
  -4 -11  -2  100.39    6.10
   4  11   2   94.79    6.00
   4  11   2   91.29    6.80
   4  11   2  103.19    6.20
  -4 -12  -2    1.70    2.60
   4  12   2    1.30    2.60
   4  12   2    1.00    1.90
   4  12   2    0.90    2.90
  -4 -13  -2  102.09    6.60
   4  13   2   94.69    6.20
   4  13   2   93.39    7.30
  -4 -14  -2   -3.00    2.90
   4  14   2    1.00    2.80
   4  14   2    3.90    3.50
  -3  14  -2   16.90    3.30
   3 -14   2   15.70    3.20
  -3  13  -2   15.30    3.00
   3 -13   2   10.30    2.80
  -3  12  -2   12.30    2.70
   3 -12   2   10.70    2.60
  -3  11  -2   15.00    2.70
   3 -11   2   13.80    2.60
  -3  10  -2   12.60    2.40
   3 -10   2   17.20    3.60
   3 -10   2   18.70    2.60
   3 -10   2    9.90    2.40
  -3   9  -2   50.09    3.80
   3  -9   2   50.79    5.20
   3  -9   2   48.40    3.70
   3  -9   2   58.89    3.80
  -3   8  -2   30.80    2.90
   3  -8   2   42.60    3.60
   3  -8   2   39.80    4.10
   3  -8   2   35.30    2.90
   3  -8   2   36.50    3.20
  -3   7  -2  160.18    7.40
  -3   7  -2  155.38    7.40
  -3   7  -2  153.48    8.80
   3  -7   2  158.08    7.40
   3  -7   2  151.38    7.90
   3  -7   2  153.18    7.40
   3  -7   2  158.78    9.20
  -3   6  -2  114.79    5.40
  -3   6  -2  102.49    5.30
   3  -6   2  110.69    5.90
   3  -6   2  103.79    5.30
   3  -6   2  114.99    5.40
   3  -6   2  108.79    6.70
  -3   5  -2  208.98    9.40
  -3   5  -2  221.38    9.40
  -3   5  -2  198.98   11.20
   3  -5   2  219.18   10.10
   3  -5   2  209.18   11.40
   3  -5   2  204.98    9.40
   3  -5   2  220.98    9.50
  -3   4  -2  197.28   10.00
  -3   4  -2  186.28    8.30
   3  -4   2  178.68    8.30
   3  -4   2  194.98   10.10
   3  -4   2  186.18    8.40
   3  -4   2  195.28    9.00
  -3   3  -2  226.18    9.70
  -3   3  -2  223.68    9.70
   3  -3   2  223.18    9.70
   3  -3   2  219.38   11.70
   3  -3   2  232.58    9.70
  -3   2  -2   53.99    3.20
  -3   2  -2   48.50    2.40
  -3   2  -2   47.70    2.30
   3  -2   2   46.60    2.30
   3  -2   2   55.89    3.30
   3  -2   2   46.00    2.30
  -3   1  -2   47.30    2.20
  -3   1  -2   51.59    2.20
   3  -1   2   51.09    3.10
   3  -1   2   50.49    2.30
   3  -1   2   51.49    2.30
  -3   0  -2  108.99    4.60
  -3   0  -2  106.09    4.60
   3   0   2  104.39    4.60
   3   0   2  106.39    4.60
  -3  -1  -2   56.89    2.50
  -3  -1  -2   51.29    2.50
  -3  -1  -2   47.90    2.90
   3   1   2   49.50    3.00
   3   1   2   54.69    2.50
   3   1   2   49.30    2.50
  -3  -2  -2   48.00    2.50
  -3  -2  -2   48.20    2.60
   3   2   2   46.50    2.50
   3   2   2   51.09    2.90
   3   2   2   48.30    2.50
  -3  -3  -2  217.08    9.60
   3   3   2  219.58    9.50
   3   3   2  209.88   10.10
   3   3   2  224.28    9.50
  -3  -4  -2  178.68    8.30
  -3  -4  -2  189.78    8.80
   3   4   2  189.48    8.30
   3   4   2  182.98    8.30
   3   4   2  181.18    8.80
  -3  -5  -2  211.08    9.50
  -3  -5  -2  207.48   10.00
   3   5   2  209.38    9.50
   3   5   2  213.48    9.50
   3   5   2  210.78   10.10
  -3  -6  -2  110.99    6.00
  -3  -6  -2  112.09    5.50
  -3  -6  -2  105.79    5.50
   3   6   2  112.39    6.00
   3   6   2  112.19    6.30
   3   6   2  109.09    5.60
   3   6   2  108.59    5.50
  -3  -7  -2  153.18    7.30
  -3  -7  -2  148.09    7.20
  -3  -7  -2  146.29    7.70
   3   7   2  144.59    8.20
   3   7   2  162.78    7.40
   3   7   2  145.49    7.80
   3   7   2  150.48    7.30
   3   7   2  140.99    7.70
  -3  -8  -2   31.90    3.00
   3   8   2   33.00    3.30
   3   8   2   32.80    3.40
   3   8   2   38.20    3.20
   3   8   2   37.10    3.50
   3   8   2   37.80    3.30
  -3  -9  -2   50.09    3.80
   3   9   2   49.99    4.30
   3   9   2   51.49    4.40
   3   9   2   49.90    3.90
   3   9   2   45.50    3.90
  -3 -10  -2   13.70    2.70
   3  10   2   12.40    2.60
   3  10   2   13.50    3.00
   3  10   2   15.20    2.30
  -3 -11  -2   17.40    3.10
   3  11   2   14.60    3.10
   3  11   2   16.30    2.90
   3  11   2   16.40    2.60
  -3 -12  -2   13.30    3.00
   3  12   2    8.30    2.10
   3  12   2   10.00    2.70
   3  12   2   11.10    3.10
  -3 -13  -2   16.30    3.40
   3  13   2   15.40    3.20
   3  13   2   14.90    3.50
  -3 -14  -2   14.70    3.30
   3  14   2   16.60    3.50
   3  14   2   16.00    4.00
  -2  14  -2  149.29    8.20
   2 -14   2  139.99    8.20
  -2  13  -2   14.90    3.10
   2 -13   2   14.70    3.00
  -2  12  -2  110.69    6.60
   2 -12   2  112.39    6.50
  -2  11  -2   44.10    3.90
   2 -11   2   44.80    4.00
  -2  10  -2  430.96   19.00
   2 -10   2  402.46   18.90
   2 -10   2  459.85   19.00
   2 -10   2  406.36   22.50
  -2   9  -2   -0.90    1.70
   2  -9   2    2.40    1.90
   2  -9   2   -1.60    2.40
   2  -9   2    0.00    1.70
  -2   8  -2  530.75   22.70
   2  -8   2  554.44   22.80
   2  -8   2  513.45   23.90
   2  -8   2  509.95   26.90
   2  -8   2  506.65   22.70
  -2   7  -2   25.30    2.40
  -2   7  -2   22.40    2.90
  -2   7  -2   28.90    2.60
   2  -7   2   27.50    2.50
   2  -7   2   30.40    2.70
   2  -7   2   24.30    2.30
   2  -7   2   27.60    3.30
  -2   6  -2  985.60   48.00
  -2   6  -2  967.00   40.90
  -2   6  -2  961.50   40.90
   2  -6   2  980.20   42.90
   2  -6   2  984.30   40.90
   2  -6   2  944.31   48.10
   2  -6   2  934.11   40.90
  -2   5  -2  130.69    6.30
  -2   5  -2  133.19    6.30
  -2   5  -2  128.89    7.50
   2  -5   2  129.49    6.30
   2  -5   2  145.09    7.70
   2  -5   2  148.49    6.80
   2  -5   2  139.69    6.30
  -2   4  -2  597.94   26.10
   2  -4   2  584.84   26.10
   2  -4   2  640.94   30.80
   2  -4   2  652.63   27.40
   2  -4   2  601.34   26.10
  -2   3  -2   40.00    2.30
  -2   3  -2   40.90    2.20
   2  -3   2   39.10    2.30
   2  -3   2   41.30    2.30
   2  -3   2   42.50    3.00
  -2   2  -2  128.59    6.80
  -2   2  -2  132.29    5.60
  -2   2  -2  127.39    5.60
   2  -2   2  128.39    6.80
   2  -2   2  128.49    5.60
   2  -2   2  125.09    5.60
  -2   1  -2  730.83   30.20
  -2   1  -2  686.43   30.20
   2  -1   2  733.23   30.20
   2  -1   2  718.63   35.50
   2  -1   2  719.83   30.20
  -2   0  -2 3617.24  148.99
  -2   0  -2 3347.06  149.79
   2   0   2 3582.54  150.28
   2   0   2 3456.75  149.99
   2   0   2 3799.92  156.78
  -2  -1  -2  754.42   30.60
  -2  -1  -2  681.73   30.60
  -2  -1  -2  775.92   32.10
   2   1   2  739.53   32.10
   2   1   2  711.63   30.60
   2   1   2  689.53   30.70
  -2  -2  -2  108.99    5.80
  -2  -2  -2  124.29    5.50
   2   2   2  132.29    5.90
   2   2   2  122.79    5.50
   2   2   2  126.69    5.50
  -2  -3  -2   39.40    2.50
   2   3   2   48.20    2.70
   2   3   2   39.50    2.40
   2   3   2   37.60    2.40
  -2  -4  -2  657.63   27.90
  -2  -4  -2  571.44   26.50
   2   4   2  666.63   27.90
   2   4   2  585.54   26.60
   2   4   2  642.24   26.60
  -2  -5  -2  139.19    6.70
  -2  -5  -2  138.89    6.80
  -2  -5  -2  154.38    7.20
   2   5   2  142.59    7.80
   2   5   2  159.48    7.30
   2   5   2  152.98    7.30
   2   5   2  143.39    6.80
   2   5   2  129.69    6.70
  -2  -6  -2  979.20   43.20
  -2  -6  -2 1010.40   41.20
  -2  -6  -2  959.00   41.20
   2   6   2  964.00   48.10
   2   6   2  945.21   41.20
   2   6   2  954.70   43.20
   2   6   2  978.00   44.40
  -2  -7  -2   25.40    2.30
  -2  -7  -2   20.00    2.40
  -2  -7  -2   22.30    2.30
   2   7   2   24.20    2.40
   2   7   2   23.80    2.70
   2   7   2   23.80    2.40
   2   7   2   24.10    2.30
   2   7   2   24.50    2.80
  -2  -8  -2  546.95   23.00
   2   8   2  511.75   24.10
   2   8   2  534.25   22.90
   2   8   2  516.55   26.60
   2   8   2  523.65   22.90
   2   8   2  515.75   24.40
  -2  -9  -2    0.00    1.70
   2   9   2    1.80    2.20
   2   9   2    1.50    1.60
   2   9   2    4.10    2.10
  -2 -10  -2  435.66   18.90
   2  10   2  384.56   19.80
   2  10   2  444.26   18.90
   2  10   2  408.76   19.70
  -2 -11  -2   38.20    3.70
   2  11   2   41.60    3.90
   2  11   2   34.00    3.30
   2  11   2   43.70    4.30
  -2 -12  -2  110.89    6.60
   2  12   2  106.69    6.20
   2  12   2   98.89    5.90
   2  12   2  102.69    7.20
  -2 -13  -2   16.70    3.30
   2  13   2   17.80    3.60
   2  13   2   20.50    3.50
  -2 -14  -2  141.79    8.50
   2  14   2  151.58    9.40
   2  14   2  155.58    8.70
  -1  14  -2   -4.50    2.50
   1 -14   2    2.80    2.70
  -1  13  -2    7.90    2.90
  -1  13  -2    6.40    2.70
   1 -13   2   13.80    3.00
  -1  12  -2    5.50    2.50
  -1  12  -2   -2.40    2.40
   1 -12   2    1.80    2.50
  -1  11  -2   16.10    3.00
  -1  11  -2   17.60    2.80
   1 -11   2   17.00    2.90
  -1  10  -2   -0.90    2.30
  -1  10  -2    0.50    2.00
   1 -10   2   -0.50    2.00
  -1   9  -2   28.30    3.30
  -1   9  -2   41.90    3.40
   1  -9   2   39.90    3.30
   1  -9   2   31.90    3.10
   1  -9   2   33.50    4.10
  -1   8  -2    1.40    1.80
  -1   8  -2    4.60    2.00
  -1   8  -2    3.60    1.80
   1  -8   2    2.20    1.90
   1  -8   2    4.90    2.30
   1  -8   2    5.10    1.70
   1  -8   2    2.20    1.60
  -1   7  -2    9.70    1.80
  -1   7  -2    5.80    1.20
  -1   7  -2   13.90    2.20
  -1   7  -2   10.20    2.00
   1  -7   2    9.20    2.20
   1  -7   2    6.80    1.90
   1  -7   2   11.00    1.80
   1  -7   2   15.70    2.00
  -1   6  -2    3.40    1.60
  -1   6  -2    2.00    1.40
  -1   6  -2    3.50    1.20
  -1   6  -2    1.20    1.50
   1  -6   2    2.60    1.90
   1  -6   2    1.80    1.30
   1  -6   2    2.00    1.30
   1  -6   2    1.30    1.40
  -1   5  -2    4.50    1.40
  -1   5  -2    3.20    1.30
  -1   5  -2    5.10    1.10
  -1   5  -2    4.60    1.30
   1  -5   2    2.20    1.20
   1  -5   2    4.80    1.20
   1  -5   2    5.50    1.20
   1  -5   2    4.10    1.70
  -1   4  -2    3.40    1.30
  -1   4  -2    4.30    1.10
  -1   4  -2    3.60    1.20
   1  -4   2    4.90    1.50
   1  -4   2    4.10    1.10
   1  -4   2    4.10    1.20
   1  -4   2    4.50    1.10
  -1   3  -2   28.80    1.90
  -1   3  -2   30.40    1.90
   1  -3   2   31.90    1.90
   1  -3   2   28.30    1.90
   1  -3   2   30.90    2.20
   1  -3   2   31.60    2.60
  -1   2  -2    5.10    0.80
  -1   2  -2    5.10    0.80
   1  -2   2    4.70    0.80
   1  -2   2    4.80    0.60
   1  -2   2    5.30    0.80
   1  -2   2    6.10    1.20
  -1   1  -2   90.39    3.90
  -1   1  -2   89.19    3.90
   1  -1   2   88.39    3.90
   1  -1   2   96.39    4.30
   1  -1   2   90.39    3.90
  -1   0  -2   57.29    2.80
   1   0   2   59.39    2.50
   1   0   2   62.99    2.90
   1   0   2   59.79    2.80
  -1  -1  -2   90.19    4.00
  -1  -1  -2   91.69    4.20
  -1  -1  -2   90.19    4.00
   1   1   2   88.89    4.00
   1   1   2   94.89    4.40
   1   1   2   91.39    4.00
   1   1   2   91.59    4.20
  -1  -2  -2    4.90    0.90
  -1  -2  -2    4.80    0.90
  -1  -2  -2    4.50    0.80
   1   2   2    6.00    1.00
   1   2   2    4.50    1.10
   1   2   2    5.90    1.10
   1   2   2    3.60    0.90
  -1  -3  -2   31.40    2.10
   1   3   2   33.80    2.50
   1   3   2   31.70    2.20
   1   3   2   28.00    2.00
   1   3   2   30.40    1.90
  -1  -4  -2    5.30    1.30
  -1  -4  -2    3.60    1.00
  -1  -4  -2    4.00    1.30
   1   4   2    2.70    1.20
   1   4   2    3.30    1.10
   1   4   2    4.40    1.40
   1   4   2    5.80    1.20
  -1  -5  -2    5.70    1.30
  -1  -5  -2    4.60    1.30
  -1  -5  -2    3.90    1.40
   1   5   2    5.30    1.40
   1   5   2    6.20    1.40
   1   5   2    3.60    1.20
   1   5   2    4.30    1.20
   1   5   2    6.50    1.60
  -1  -6  -2    4.70    1.50
  -1  -6  -2    3.60    1.50
  -1  -6  -2    1.90    1.60
   1   6   2    5.90    1.30
   1   6   2    2.60    1.70
   1   6   2    2.60    1.40
   1   6   2    3.90    1.50
   1   6   2    4.50    1.60
  -1  -7  -2   12.40    1.90
  -1  -7  -2    8.70    1.80
  -1  -7  -2   14.40    2.20
   1   7   2    9.40    1.70
   1   7   2   12.90    2.20
   1   7   2   10.20    1.80
   1   7   2   11.80    2.20
   1   7   2   14.30    2.00
  -1  -8  -2    3.90    1.60
  -1  -8  -2    0.80    1.80
  -1  -8  -2    3.10    1.80
   1   8   2    2.50    1.70
   1   8   2    2.80    1.40
   1   8   2    3.10    1.70
   1   8   2    4.20    1.90
   1   8   2    3.90    2.20
  -1  -9  -2   34.50    3.40
   1   9   2   39.60    3.40
   1   9   2   27.00    3.30
   1   9   2   27.90    2.50
  -1 -10  -2    0.90    2.30
   1  10   2   -0.60    1.40
   1  10   2   -0.50    2.20
   1  10   2   -1.10    2.40
  -1 -11  -2   14.20    2.90
   1  11   2   14.60    3.10
   1  11   2   16.70    2.10
   1  11   2   13.00    2.60
  -1 -12  -2    0.60    2.50
   1  12   2    0.20    2.50
   1  12   2   -1.30    1.60
   1  12   2    4.70    2.80
  -1 -13  -2    8.90    3.00
   1  13   2    4.30    3.00
   1  13   2    7.40    2.80
  -1 -14  -2    5.70    2.80
   1  14   2    3.20    3.30
   1  14   2   -3.10    2.70
   0  14  -2   10.20    2.90
   0  14  -2   18.60    3.60
   0 -14   2   13.50    3.40
   0  13  -2  196.88   10.80
   0  13  -2  202.78   10.20
   0 -13   2  195.58   10.30
   0  12  -2   41.80    4.30
   0  12  -2   41.60    4.10
   0 -12   2   44.20    4.20
   0  11  -2   55.79    4.50
   0  11  -2   49.99    4.50
   0 -11   2   48.50    4.20
   0  10  -2    7.30    2.60
   0  10  -2    6.30    2.40
   0 -10   2    7.50    2.30
   0   9  -2   68.89    5.00
   0   9  -2   73.39    4.60
   0  -9   2   71.19    4.60
   0  -9   2   68.69    5.70
   0  -9   2   75.09    4.50
   0   8  -2   85.69    5.30
   0   8  -2   81.19    4.80
   0   8  -2   82.69    5.60
   0  -8   2   81.89    5.90
   0  -8   2   90.99    4.80
   0  -8   2   89.99    4.90
   0  -8   2   77.59    5.10
   0   7  -2  655.93   32.90
   0   7  -2  673.53   28.10
   0   7  -2  623.74   29.70
   0   7  -2  679.53   28.10
   0   7  -2  633.34   29.40
   0  -7   2  637.84   29.40
   0  -7   2  692.33   28.10
   0  -7   2  637.04   32.90
   0  -7   2  652.93   28.10
   0   6  -2    8.60    1.50
   0   6  -2    8.90    1.80
   0   6  -2    8.50    1.70
   0   6  -2    4.60    1.50
   0   6  -2    7.40    0.90
   0  -6   2    7.70    1.60
   0  -6   2    6.70    1.50
   0  -6   2    8.80    1.70
   0  -6   2    9.30    2.20
   0   5  -2 1210.18   52.69
   0   5  -2 1176.48   50.39
   0   5  -2 1198.58   58.89
   0   5  -2 1186.78   53.99
   0  -5   2 1227.38   58.99
   0  -5   2 1214.18   52.79
   0  -5   2 1129.79   50.29
   0  -5   2 1203.98   50.39
   0   4  -2  104.79    5.70
   0   4  -2  107.29    5.10
   0   4  -2   88.79    4.80
   0  -4   2  109.99    5.90
   0  -4   2  112.59    5.20
   0  -4   2   98.69    4.90
   0  -4   2   92.69    4.80
   0   3  -2 1202.68   58.09
   0   3  -2 1198.68   51.99
   0   3  -2 1134.69   49.60
   0  -3   2 1199.38   51.99
   0  -3   2 1211.98   58.09
   0  -3   2 1154.78   49.60
   0  -3   2 1158.18   49.60
   0   2  -2 1206.38   58.29
   0   2  -2 1223.18   52.09
   0   2  -2 1081.39   49.70
   0   2  -2 1166.18   49.99
   0  -2   2 1227.68   51.99
   0  -2   2 1145.89   49.99
   0  -2   2 1250.47   58.39
   0  -2   2 1171.38   49.70
   0   1  -2 1754.82   76.39
   0   1  -2 1939.51   82.49
   0   1  -2 1807.12   76.39
   0  -1   2 1824.72   79.89
   0  -1   2 1861.01   89.49
   0  -1   2 1727.23   76.39
   0  -1   2 1816.92   76.39
   0   0  -2   98.79    4.30
   0   0  -2  100.19    4.50
   0   0  -2   88.29    4.10
   0   0   2   80.29    4.10
   0  -1  -2 1844.42   79.19
   0  -1  -2 2015.40   83.19
   0  -1  -2 1905.61   85.59
   0   1   2 1936.91   83.09
   0   1   2 1891.91   85.69
   0   1   2 1915.71   79.09
   0   1   2 1672.93   79.09
   0  -2  -2 1260.47   55.89
   0  -2  -2 1305.97   54.29
   0  -2  -2 1201.08   51.89
   0   2   2 1225.98   51.79
   0   2   2 1090.59   51.59
   0   2   2 1293.57   55.89
   0  -3  -2 1231.98   54.59
   0  -3  -2 1142.59   50.59
   0  -3  -2 1180.28   50.59
   0   3   2 1175.28   50.59
   0   3   2 1198.98   54.59
   0   3   2 1239.48   53.09
   0   3   2 1249.38   50.59
   0  -4  -2  116.39    5.40
   0  -4  -2   96.49    5.00
   0  -4  -2   98.29    5.00
   0   4   2  107.59    5.00
   0   4   2   93.49    5.00
   0   4   2  106.09    5.90
   0   4   2  115.59    5.50
   0   4   2  111.09    5.20
   0  -5  -2 1253.67   51.59
   0  -5  -2 1200.08   54.09
   0  -5  -2 1205.28   51.59
   0   5   2 1217.18   55.49
   0   5   2 1228.08   51.59
   0   5   2 1235.38   60.29
   0   5   2 1197.18   51.59
   0   5   2 1239.38   54.09
   0  -6  -2    7.90    1.60
   0  -6  -2   12.30    1.90
   0  -6  -2    5.30    1.40
   0   6   2    7.70    1.90
   0   6   2   12.70    2.10
   0   6   2   13.00    1.40
   0   6   2    9.50    1.60
   0   6   2   10.60    1.70
   0  -7  -2  650.03   28.20
   0  -7  -2  657.43   29.60
   0  -7  -2  667.83   28.20
   0   7   2  652.73   28.20
   0   7   2  690.63   28.20
   0   7   2  658.93   32.90
   0   7   2  630.84   29.50
   0   7   2  632.54   30.00
   0  -8  -2   92.89    5.00
   0  -8  -2   92.29    5.00
   0  -8  -2   84.19    5.40
   0   8   2   85.29    4.70
   0   8   2   83.79    4.80
   0   8   2   85.19    4.90
   0   8   2   78.19    5.80
   0   8   2   90.29    5.50
   0  -9  -2   72.99    4.40
   0   9   2   74.09    4.60
   0   9   2   67.19    5.00
   0   9   2   67.29    4.10
   0 -10  -2    7.60    2.60
   0  10   2    5.60    2.40
   0  10   2    2.70    1.50
   0  10   2   10.20    2.70
   0 -11  -2   52.89    4.50
   0  11   2   57.69    4.40
   0  11   2   47.00    3.40
   0  11   2   56.59    4.90
   0 -12  -2   45.20    4.40
   0  12   2   47.80    4.30
   0  12   2   45.00    4.70
   0 -13  -2  193.88   10.50
   0  13   2  202.68   11.30
   0  13   2  218.48   10.60
   0 -14  -2   13.60    3.30
   0  14   2   15.50    3.30
   0  14   2   11.40    3.30
   1  14  -2    3.20    2.80
   1  14  -2    3.80    2.80
  -1 -14   2    3.90    2.90
   1  13  -2    1.90    2.30
   1  13  -2    1.30    2.80
  -1 -13   2   -0.40    2.60
   1  12  -2    7.50    2.90
   1  12  -2    9.90    3.00
  -1 -12   2    7.60    2.50
   1  11  -2    0.40    1.10
   1  11  -2    4.50    2.50
   1  11  -2    3.80    2.60
  -1 -11   2    2.10    2.30
   1  10  -2    4.80    1.20
   1  10  -2    3.10    2.30
   1  10  -2    1.80    2.10
  -1 -10   2    2.90    2.30
   1   9  -2    4.20    1.20
   1   9  -2    2.80    2.20
   1   9  -2    4.50    1.90
  -1  -9   2    6.70    2.20
  -1  -9   2    6.40    2.20
   1   8  -2    3.00    1.90
   1   8  -2    5.10    1.80
   1   8  -2    5.00    2.10
   1   8  -2    4.80    1.10
  -1  -8   2    2.70    1.60
  -1  -8   2    4.60    2.20
  -1  -8   2    2.70    1.80
  -1  -8   2    2.20    1.70
   1   7  -2    0.10    1.60
   1   7  -2   -0.50    1.40
   1   7  -2    0.30    0.90
   1   7  -2    0.60    1.30
   1   7  -2   -0.50    1.30
  -1  -7   2    1.30    1.40
  -1  -7   2   -1.70    1.40
  -1  -7   2   -1.20    1.50
  -1  -7   2    0.60    1.70
   1   6  -2    5.10    1.40
   1   6  -2    2.30    1.70
   1   6  -2    5.10    1.40
   1   6  -2    2.60    1.50
  -1  -6   2    0.60    1.50
  -1  -6   2    3.60    1.60
  -1  -6   2    4.60    1.40
  -1  -6   2    4.00    1.80
   1   5  -2   14.90    1.80
   1   5  -2   21.90    1.90
   1   5  -2   17.10    1.70
   1   5  -2   15.60    1.80
  -1  -5   2   21.60    1.90
  -1  -5   2   17.60    1.80
  -1  -5   2   18.70    1.90
  -1  -5   2   19.10    2.10
   1   4  -2   58.89    3.60
   1   4  -2   68.39    3.40
   1   4  -2   64.89    3.40
   1   4  -2   60.39    3.80
  -1  -4   2   61.69    4.00
  -1  -4   2   64.49    3.30
  -1  -4   2   59.29    3.50
  -1  -4   2   67.19    3.40
   1   3  -2    0.10    0.80
   1   3  -2   -0.30    0.80
   1   3  -2    1.00    1.00
   1   3  -2    1.40    1.00
  -1  -3   2    0.20    1.10
  -1  -3   2    0.50    0.90
  -1  -3   2    0.40    1.00
  -1  -3   2    1.80    1.10
   1   2  -2   75.49    3.60
   1   2  -2   78.39    4.10
   1   2  -2   74.99    3.70
   1   2  -2   76.49    3.60
  -1  -2   2   78.39    4.10
  -1  -2   2   75.09    3.70
  -1  -2   2   77.79    3.60
  -1  -2   2   73.69    3.60
   1   1  -2   -8.50    0.50
   1   1  -2   -8.60    0.50
  -1  -1   2   -7.20    0.50
  -1  -1   2   -8.80    0.50
  -1  -1   2   -7.20    0.60
   1   0  -2   28.50    1.40
  -1   0   2   31.00    1.40
   1  -1  -2   -6.90    0.60
   1  -1  -2   -7.90    0.60
   1  -1  -2   -9.40    0.50
  -1   1   2   -8.70    0.60
  -1   1   2   -9.00    0.60
   1  -2  -2   76.39    3.80
   1  -2  -2   75.09    3.80
   1  -2  -2   78.49    3.60
   1  -2  -2   74.29    3.60
  -1   2   2   75.59    3.80
  -1   2   2   74.19    3.60
  -1   2   2   76.29    3.90
  -1   2   2   75.89    3.60
   1  -3  -2    0.30    1.00
   1  -3  -2   -1.00    0.40
   1  -3  -2   -0.60    1.00
   1  -3  -2    0.00    0.80
  -1   3   2    0.00    0.90
  -1   3   2    1.10    1.10
  -1   3   2    0.40    1.00
  -1   3   2    0.60    0.80
  -1   3   2   -1.00    0.50
   1  -4  -2   65.09    3.40
   1  -4  -2   63.79    3.70
   1  -4  -2   63.29    3.40
   1  -4  -2   61.69    3.30
  -1   4   2   61.39    3.70
  -1   4   2   63.29    4.00
  -1   4   2   61.49    3.30
  -1   4   2   68.09    3.40
  -1   4   2   62.29    3.40
   1  -5  -2   15.70    1.60
   1  -5  -2   23.00    2.00
   1  -5  -2   19.70    1.80
   1  -5  -2   14.50    1.90
  -1   5   2   13.70    1.90
  -1   5   2   22.10    2.20
  -1   5   2   17.30    1.70
  -1   5   2   18.30    1.50
  -1   5   2   24.10    1.90
   1  -6  -2    5.90    1.70
   1  -6  -2    4.30    1.50
   1  -6  -2    3.80    1.60
  -1   6   2    5.70    1.50
  -1   6   2    4.50    1.90
  -1   6   2    4.30    1.40
  -1   6   2    2.00    1.10
  -1   6   2    3.70    1.70
   1  -7  -2   -1.30    1.60
   1  -7  -2   -0.90    1.40
   1  -7  -2   -2.30    1.30
  -1   7   2   -1.20    1.90
  -1   7   2    1.00    1.40
  -1   7   2    0.80    1.50
  -1   7   2   -0.40    1.00
  -1   7   2   -0.50    1.50
   1  -8  -2    6.00    1.90
   1  -8  -2    3.20    1.60
   1  -8  -2    4.30    1.90
  -1   8   2    1.60    2.00
  -1   8   2    1.20    1.20
  -1   8   2    4.90    1.80
  -1   8   2    3.80    1.80
   1  -9  -2    5.50    2.10
   1  -9  -2    8.30    2.10
  -1   9   2    3.70    2.10
  -1   9   2    5.30    2.30
   1 -10  -2    1.80    2.00
  -1  10   2    3.40    2.20
  -1  10   2    2.30    2.50
   1 -11  -2    4.80    2.50
  -1  11   2    4.60    2.20
  -1  11   2    4.00    2.60
   1 -12  -2    6.90    2.60
  -1  12   2    5.10    2.90
  -1  12   2   10.30    2.80
   1 -13  -2   -1.40    2.50
  -1  13   2    3.50    2.90
  -1  13   2    0.40    2.50
   1 -14  -2    2.50    2.80
  -1  14   2    8.90    3.10
  -1  14   2   -1.00    3.00
   2  14  -2  153.38    9.60
   2  14  -2  169.48    9.10
  -2 -14   2  161.98    9.10
   2  13  -2   17.40    3.40
   2  13  -2   12.40    3.40
  -2 -13   2   17.10    3.20
   2  12  -2   51.19    4.70
   2  12  -2   57.59    5.10
  -2 -12   2   50.19    4.60
   2  11  -2  147.59    7.50
   2  11  -2  149.19    8.60
   2  11  -2  158.58    8.00
  -2 -11   2  141.59    7.80
   2  10  -2   70.49    4.10
   2  10  -2   72.29    5.30
   2  10  -2   66.29    4.80
  -2 -10   2   66.69    4.60
   2   9  -2  368.16   18.50
   2   9  -2  343.27   16.70
   2   9  -2  355.76   15.90
   2   9  -2  337.27   16.50
  -2  -9   2  365.56   16.00
   2   8  -2   62.19    4.50
   2   8  -2   64.59    4.50
   2   8  -2   59.99    4.10
   2   8  -2   66.09    3.70
  -2  -8   2   64.19    4.10
  -2  -8   2   58.29    4.20
  -2  -8   2   57.19    4.10
   2   7  -2   86.59    5.10
   2   7  -2   85.29    4.80
   2   7  -2   85.09    5.30
   2   7  -2   81.29    4.80
  -2  -7   2   89.29    4.90
  -2  -7   2   86.69    5.60
  -2  -7   2   86.29    5.00
  -2  -7   2   93.29    4.80
   2   6  -2 1269.17   54.39
   2   6  -2 1227.98   54.39
   2   6  -2 1317.77   63.59
   2   6  -2 1284.97   56.99
  -2  -6   2 1307.57   54.49
  -2  -6   2 1319.77   54.49
  -2  -6   2 1295.07   56.99
  -2  -6   2 1280.67   63.59
   2   5  -2  135.79    7.50
   2   5  -2  131.49    6.50
   2   5  -2  141.39    6.90
   2   5  -2  135.39    6.50
  -2  -5   2  145.19    6.80
  -2  -5   2  143.09    6.60
  -2  -5   2  144.89    6.60
  -2  -5   2  138.39    7.60
   2   4  -2 2026.30   88.29
   2   4  -2 2021.10  103.49
   2   4  -2 2137.69   88.79
   2   4  -2 2170.78   92.49
  -2  -4   2 2121.89  103.19
  -2  -4   2 2177.28   88.29
  -2  -4   2 2141.99   92.49
  -2  -4   2 2044.50   88.29
   2   3  -2   90.99    4.30
   2   3  -2   93.79    4.30
   2   3  -2   94.59    4.60
   2   3  -2   90.19    4.90
  -2  -3   2   87.59    5.00
  -2  -3   2   90.69    4.60
  -2  -3   2  102.09    4.40
  -2  -3   2   91.99    4.40
   2   2  -2   94.39    4.40
   2   2  -2   88.19    4.70
   2   2  -2   90.49    4.20
   2   2  -2   92.69    4.30
  -2  -2   2   97.29    4.30
  -2  -2   2   90.29    4.80
  -2  -2   2   90.39    4.40
  -2  -2   2   93.99    4.20
   2   1  -2 1788.62   79.89
   2   1  -2 1889.51   79.89
   2   1  -2 1986.00   83.79
  -2  -1   2 1939.71   83.59
  -2  -1   2 1900.11   79.89
   2   0  -2 1089.29   43.50
   2   0  -2 1051.39   43.40
  -2   0   2  891.91   43.20
  -2   0   2 1099.79   43.60
   2  -1  -2 2013.70   85.29
   2  -1  -2 2023.80   85.19
  -2   1   2 2019.70   85.29
  -2   1   2 2057.19   85.19
   2  -2  -2   97.19    4.50
   2  -2  -2   94.39    4.30
  -2   2   2   77.89    4.20
  -2   2   2   94.29    4.30
  -2   2   2  100.39    5.10
   2  -3  -2  103.29    4.80
   2  -3  -2   98.69    4.50
   2  -3  -2   95.49    4.50
  -2   3   2   93.59    5.40
  -2   3   2   93.99    4.90
   2  -4  -2 2110.09   92.59
   2  -4  -2 2207.38   95.49
   2  -4  -2 2052.29   88.29
   2  -4  -2 2091.19   88.59
  -2   4   2 1993.70   88.29
  -2   4   2 2176.28   92.59
   2  -5  -2  138.39    6.50
   2  -5  -2  148.29    6.70
   2  -5  -2  132.19    6.50
   2  -5  -2  149.69    7.10
  -2   5   2  134.49    6.50
  -2   5   2  143.69    7.10
   2  -6  -2 1262.57   54.69
   2  -6  -2 1281.97   54.69
   2  -6  -2 1273.57   57.39
   2  -6  -2 1307.77   58.69
  -2   6   2 1284.77   57.29
  -2   6   2 1300.97   54.69
  -2   6   2 1301.87   63.99
  -2   6   2 1336.77   54.69
   2  -7  -2   92.09    4.80
   2  -7  -2   85.09    5.30
   2  -7  -2   85.69    4.50
   2  -7  -2   84.99    4.80
  -2   7   2   88.69    5.30
  -2   7   2   98.49    4.80
  -2   7   2   81.29    5.70
  -2   7   2   91.69    4.80
   2  -8  -2   55.09    3.70
   2  -8  -2   51.29    3.80
  -2   8   2   55.29    3.80
  -2   8   2   61.59    4.40
   2  -9  -2  383.36   16.50
   2  -9  -2  361.76   16.40
  -2   9   2  366.96   16.40
  -2   9   2  349.96   17.30
   2 -10  -2   66.39    4.70
  -2  10   2   79.59    4.80
  -2  10   2   68.39    5.40
   2 -11  -2  156.98    8.40
  -2  11   2  158.78    9.10
  -2  11   2  168.38    8.50
   2 -12  -2   50.59    4.50
  -2  12   2   57.69    5.10
  -2  12   2   51.09    4.50
   2 -13  -2   20.70    3.50
  -2  13   2   16.80    3.20
  -2  13   2   14.80    3.50
   2 -14  -2  161.38    9.20
  -2  14   2  172.68    9.20
   3  14  -2    1.40    3.00
   3  14  -2    4.10    3.20
  -3 -14   2    2.70    2.70
   3  13  -2   38.00    4.20
   3  13  -2   28.40    4.10
  -3 -13   2   28.10    3.90
   3  12  -2   -1.10    2.50
   3  12  -2   -0.30    1.60
   3  12  -2   -0.50    2.50
  -3 -12   2   -0.20    2.40
   3  11  -2   74.09    4.70
   3  11  -2   85.39    5.40
   3  11  -2   66.19    5.70
  -3 -11   2   82.69    5.40
   3  10  -2    4.80    2.50
   3  10  -2    2.30    2.30
   3  10  -2    5.40    1.60
  -3 -10   2    4.40    2.10
   3   9  -2   86.99    5.30
   3   9  -2   85.39    5.00
   3   9  -2   91.89    5.80
   3   9  -2   83.49    5.80
  -3  -9   2   89.19    5.30
   3   8  -2   10.10    2.30
   3   8  -2    8.60    2.10
   3   8  -2    9.20    2.00
  -3  -8   2    9.10    2.10
  -3  -8   2    6.50    2.00
  -3  -8   2   14.90    2.40
   3   7  -2   92.79    5.00
   3   7  -2   91.39    5.10
   3   7  -2   92.69    5.40
   3   7  -2   92.29    5.60
  -3  -7   2  100.19    5.20
  -3  -7   2  101.69    5.00
  -3  -7   2   88.39    5.30
   3   6  -2    4.80    1.70
   3   6  -2    2.20    1.40
   3   6  -2    3.40    1.30
   3   6  -2    1.50    1.40
  -3  -6   2    1.80    1.50
  -3  -6   2    2.60    1.50
  -3  -6   2    2.20    1.40
   3   5  -2   86.99    5.00
   3   5  -2   88.19    4.80
   3   5  -2   84.69    4.50
   3   5  -2   94.39    4.50
  -3  -5   2   88.39    4.60
  -3  -5   2   89.79    4.50
  -3  -5   2   82.19    4.70
   3   4  -2   23.50    1.90
   3   4  -2   24.50    1.90
   3   4  -2   23.00    1.80
   3   4  -2   19.20    1.80
  -3  -4   2   22.90    2.00
  -3  -4   2   21.10    2.00
  -3  -4   2   20.10    1.80
  -3  -4   2   20.80    1.80
   3   3  -2   14.60    1.50
   3   3  -2   17.30    1.40
   3   3  -2   14.60    1.50
   3   3  -2   15.20    1.40
  -3  -3   2   14.80    1.50
  -3  -3   2   13.30    1.40
  -3  -3   2   14.40    1.40
  -3  -3   2   15.00    1.40
   3   2  -2   54.09    2.90
   3   2  -2   54.09    2.80
   3   2  -2   56.89    3.00
   3   2  -2   52.99    2.80
  -3  -2   2   51.79    2.90
  -3  -2   2   57.19    3.00
  -3  -2   2   54.89    2.90
   3   1  -2  190.58    8.10
   3   1  -2  183.68    8.10
   3   1  -2  180.58    8.50
  -3  -1   2  190.18    8.10
  -3  -1   2  185.98    8.10
   3   0  -2   18.50    1.40
   3   0  -2   15.80    1.40
  -3   0   2   16.60    1.40
  -3   0   2   17.60    1.30
  -3   0   2   18.30    1.40
   3  -1  -2  187.98    8.10
   3  -1  -2  184.98    8.20
  -3   1   2  189.88    8.10
  -3   1   2  188.38    9.50
  -3   1   2  183.48    8.10
   3  -2  -2   58.89    3.10
   3  -2  -2   56.89    3.00
  -3   2   2   59.49    3.60
  -3   2   2   62.19    3.00
  -3   2   2   56.19    3.00
   3  -3  -2   14.30    1.40
   3  -3  -2   14.10    1.40
  -3   3   2   15.60    1.50
  -3   3   2   19.00    2.00
   3  -4  -2   22.00    1.80
   3  -4  -2   25.90    2.20
   3  -4  -2   19.80    1.90
   3  -5  -2   91.99    5.00
   3  -5  -2   88.69    4.40
   3  -5  -2   84.19    4.40
   3  -5  -2   85.49    4.40
  -3   5   2   92.99    5.40
  -3   5   2   91.49    4.40
  -3   5   2   80.49    4.40
   3  -6  -2    1.80    1.40
   3  -6  -2    1.30    1.30
   3  -6  -2    2.60    1.60
   3  -6  -2    1.90    0.90
  -3   6   2    2.40    1.20
  -3   6   2    2.00    1.30
   3  -7  -2   96.29    5.00
   3  -7  -2  107.79    5.10
   3  -7  -2   89.39    4.70
   3  -7  -2   98.99    5.60
  -3   7   2   89.39    5.80
  -3   7   2   92.39    5.00
  -3   7   2   92.99    5.50
   3  -8  -2    7.00    2.00
   3  -8  -2    8.20    2.00
   3  -8  -2    9.20    1.20
  -3   8   2   12.70    2.10
  -3   8   2   11.40    2.30
   3  -9  -2   96.89    5.20
   3  -9  -2   91.69    5.20
  -3   9   2   88.39    5.20
  -3   9   2   79.09    5.90
   3 -10  -2    4.50    2.30
  -3  10   2    3.80    2.10
   3 -11  -2   82.99    5.30
  -3  11   2   77.09    5.20
   3 -12  -2    1.80    2.40
  -3  12   2   -3.40    2.20
   3 -13  -2   31.90    3.90
  -3  13   2   31.40    3.80
   3 -14  -2   -0.70    2.50
  -3  14   2    1.30    2.60
   4  14  -2    4.00    3.10
   4  14  -2    1.40    3.10
  -4 -14   2   -4.80    2.60
   4  13  -2   10.60    3.40
   4  13  -2   12.50    3.10
  -4 -13   2    9.20    3.00
   4  12  -2   79.29    5.60
   4  12  -2   77.39    5.10
   4  12  -2   75.79    6.10
  -4 -12   2   84.59    5.70
   4  11  -2   53.59    4.80
   4  11  -2   46.50    4.30
   4  11  -2   41.50    3.70
  -4 -11   2   51.89    4.50
   4  10  -2  129.89    7.30
   4  10  -2  134.99    8.00
   4  10  -2  142.69    7.50
  -4 -10   2  146.19    7.60
   4   9  -2    9.00    2.10
   4   9  -2    6.50    2.30
   4   9  -2    5.80    2.30
  -4  -9   2    7.00    2.30
   4   8  -2  298.17   13.30
   4   8  -2  280.57   13.90
   4   8  -2  295.87   15.20
  -4  -8   2  292.17   13.30
  -4  -8   2  285.67   13.80
   4   7  -2  172.58    8.60
   4   7  -2  153.68    8.00
   4   7  -2  168.58    8.10
   4   7  -2  178.98    9.10
  -4  -7   2  165.78    8.10
  -4  -7   2  170.68    8.40
  -4  -7   2  169.68    8.10
   4   6  -2   81.79    4.20
   4   6  -2   76.69    4.50
   4   6  -2   72.89    4.60
   4   6  -2   67.69    4.10
  -4  -6   2   81.69    4.20
  -4  -6   2   69.89    4.30
  -4  -6   2   68.29    4.20
   4   5  -2   25.80    2.20
   4   5  -2   21.90    2.30
   4   5  -2   39.50    2.80
   4   5  -2   24.30    2.30
  -4  -5   2   25.40    2.30
  -4  -5   2   34.60    2.60
  -4  -5   2   31.10    2.60
   4   4  -2   60.39    3.50
   4   4  -2   65.59    3.60
   4   4  -2   60.69    3.30
   4   4  -2   67.59    3.40
  -4  -4   2   52.49    3.20
  -4  -4   2   58.59    3.30
  -4  -4   2   64.29    3.50
   4   3  -2    6.00    1.20
   4   3  -2    7.90    1.20
   4   3  -2    6.80    0.80
   4   3  -2    7.00    1.10
  -4  -3   2    7.70    1.20
  -4  -3   2    5.60    1.20
   4   2  -2  452.65   19.70
   4   2  -2  442.86   18.80
   4   2  -2  425.76   18.80
  -4  -2   2  449.46   19.70
  -4  -2   2  434.96   18.80
   4   1  -2  407.46   18.10
   4   1  -2  438.16   18.10
   4   1  -2  432.66   19.00
  -4  -1   2  427.86   18.10
  -4  -1   2  426.36   18.10
   4   0  -2  122.99    5.50
   4   0  -2  125.99    5.50
  -4   0   2  128.69    5.50
  -4   0   2  125.39    5.50
  -4   0   2  114.49    6.30
   4  -1  -2  438.86   21.70
   4  -1  -2  452.65   18.60
   4  -1  -2  426.16   18.60
  -4   1   2  420.56   21.70
  -4   1   2  443.26   18.60
  -4   1   2  448.26   18.60
   4  -2  -2  481.25   20.00
   4  -2  -2  469.55   23.40
   4  -2  -2  461.85   19.90
  -4   2   2  474.65   19.90
  -4   2   2  475.55   19.90
  -4   2   2  454.75   23.40
   4  -3  -2    7.80    1.10
   4  -3  -2    5.40    1.50
  -4   3   2    7.50    1.20
  -4   3   2    5.70    1.30
   4  -4  -2   66.19    3.40
   4  -4  -2   73.79    3.90
   4  -4  -2   63.49    3.40
   4  -4  -2   61.49    4.40
  -4   4   2   63.19    4.20
  -4   4   2   66.99    3.40
  -4   4   2   66.29    3.50
   4  -5  -2   19.90    2.00
   4  -5  -2   36.40    2.90
   4  -5  -2   27.10    2.30
   4  -5  -2   27.60    3.00
  -4   5   2   24.40    2.60
  -4   5   2   27.70    2.30
  -4   5   2   30.70    2.40
   4  -6  -2   74.99    4.10
   4  -6  -2   70.09    4.00
   4  -6  -2   75.29    4.70
   4  -6  -2   76.49    3.90
  -4   6   2   70.99    5.00
  -4   6   2   77.99    4.00
   4  -7  -2  169.98    7.90
   4  -7  -2  160.98    7.90
   4  -7  -2  172.68    8.60
   4  -7  -2  154.88    7.90
  -4   7   2  175.58    7.90
  -4   7   2  162.98    9.40
   4  -8  -2  282.57   13.30
   4  -8  -2  308.07   13.40
   4  -8  -2  294.67   13.70
   4  -9  -2    5.70    2.00
   4  -9  -2    5.80    2.10
   4 -10  -2  132.39    7.40
  -4  10   2  155.48    7.50
   4 -11  -2   43.60    4.00
   4 -12  -2   85.29    5.60
   4 -13  -2   10.80    2.70
   4 -14  -2   -1.30    2.40
   5  14  -2   33.60    4.80
   5  14  -2   36.60    4.50
  -5 -14   2   28.50    4.20
   5  13  -2    3.30    2.80
   5  13  -2    1.80    2.90
  -5 -13   2    4.90    2.80
   5  12  -2  102.89    6.20
   5  12  -2   88.19    5.60
   5  12  -2   81.09    6.60
  -5 -12   2   89.39    6.00
   5  11  -2    9.20    2.50
   5  11  -2    7.40    2.90
   5  11  -2   10.40    2.20
  -5 -11   2   13.40    3.00
   5  10  -2   81.29    5.10
   5  10  -2   82.39    5.50
   5  10  -2   82.49    5.90
  -5 -10   2   77.59    5.30
   5   9  -2   40.30    3.90
   5   9  -2   28.70    3.30
   5   9  -2   40.70    3.70
  -5  -9   2   37.60    3.60
   5   8  -2  150.98    8.30
   5   8  -2  147.29    8.00
   5   8  -2  143.69    7.50
  -5  -8   2  158.28    7.70
   5   7  -2   41.00    3.70
   5   7  -2   41.30    3.20
   5   7  -2   35.40    3.00
   5   7  -2   39.00    3.10
  -5  -7   2   36.70    3.20
  -5  -7   2   33.90    3.20
   5   6  -2  312.87   13.70
   5   6  -2  305.07   14.30
   5   6  -2  297.27   13.60
   5   6  -2  310.37   15.60
  -5  -6   2  304.77   13.70
  -5  -6   2  323.17   13.70
  -5  -6   2  294.07   14.20
   5   5  -2  147.09    7.30
   5   5  -2  149.88    6.90
   5   5  -2  151.68    6.90
   5   5  -2  140.89    7.50
  -5  -5   2  125.89    6.70
  -5  -5   2  147.59    7.20
  -5  -5   2  149.59    6.90
   5   4  -2  424.36   19.10
   5   4  -2  409.76   18.10
   5   4  -2  426.36   20.80
   5   4  -2  424.26   18.20
  -5  -4   2  427.56   18.20
  -5  -4   2  413.16   19.00
   5   3  -2  162.68    8.10
   5   3  -2  173.28    7.70
   5   3  -2  185.48    7.70
  -5  -3   2  179.48    7.80
  -5  -3   2  171.68    8.10
  -5  -3   2  155.08    7.60
   5   2  -2  793.32   34.80
   5   2  -2  776.92   33.10
   5   2  -2  781.02   33.10
  -5  -2   2  786.52   33.20
   5   1  -2  156.38    6.60
   5   1  -2  139.99    7.00
   5   1  -2  150.88    6.60
  -5  -1   2  144.59    6.60
  -5  -1   2  150.28    6.60
   5   0  -2   71.79    3.60
   5   0  -2   76.29    3.70
  -5   0   2   79.59    3.60
  -5   0   2   76.79    4.10
  -5   0   2   78.29    3.70
   5  -1  -2  155.38    6.80
   5  -1  -2  153.58    6.80
   5  -1  -2  153.38    8.00
  -5   1   2  157.68    6.80
  -5   1   2  154.78    6.80
  -5   1   2  151.38    8.00
   5  -2  -2  830.52   34.50
   5  -2  -2  821.02   40.40
   5  -2  -2  795.62   34.40
  -5   2   2  824.72   40.40
  -5   2   2  813.42   34.50
   5  -3  -2  165.98    9.50
   5  -3  -2  177.38    8.00
   5  -3  -2  174.18    7.90
  -5   3   2  193.08    7.90
  -5   3   2  178.38    7.90
   5  -4  -2  409.76   18.30
   5  -4  -2  420.06   18.30
   5  -4  -2  427.16   21.70
  -5   4   2  438.16   18.30
  -5   4   2  436.16   21.60
  -5   4   2  423.86   18.30
   5  -5  -2  161.08    7.90
   5  -5  -2  163.18    7.20
   5  -5  -2  147.79    8.80
   5  -5  -2  151.48    7.20
  -5   5   2  166.38    7.20
  -5   5   2  155.28    8.70
  -5   5   2  150.48    7.30
   5  -6  -2  315.87   13.80
   5  -6  -2  318.57   14.80
   5  -6  -2  303.87   13.80
  -5   6   2  322.27   13.80
  -5   6   2  323.97   16.40
  -5   6   2  297.27   13.90
   5  -7  -2   39.20    3.10
   5  -7  -2   40.70    2.70
   5  -7  -2   46.20    3.10
  -5   7   2   39.40    3.20
   5  -8  -2  144.59    7.20
   5  -8  -2  152.68    7.40
   5  -8  -2  141.99    7.20
  -5   8   2  156.18    7.50
   5  -9  -2   38.40    3.30
   5  -9  -2   34.20    2.40
   5  -9  -2   37.80    3.30
   5 -10  -2   79.49    5.30
   5 -10  -2   90.79    5.30
   5 -11  -2    8.90    2.40
   5 -12  -2   81.69    5.40
   5 -13  -2    5.30    2.50
   5 -14  -2   33.40    4.00
  -5  14   2   35.10    4.30
   6  13  -2   17.60    3.50
   6  13  -2   14.60    3.50
  -6 -13   2   16.60    3.40
   6  12  -2   10.30    2.70
   6  12  -2    9.10    2.30
   6  12  -2    9.90    3.30
  -6 -12   2   12.20    2.90
   6  11  -2   76.19    6.20
   6  11  -2   81.59    5.60
  -6 -11   2   81.19    5.70
   6  10  -2    2.90    1.90
   6  10  -2    4.20    2.10
   6  10  -2    2.30    2.50
  -6 -10   2    0.50    2.30
   6   9  -2   91.49    6.30
   6   9  -2  103.49    5.90
   6   9  -2   94.89    6.00
  -6  -9   2  103.39    5.90
   6   8  -2   23.40    2.50
   6   8  -2   25.90    3.10
   6   8  -2   24.70    2.80
  -6  -8   2   22.50    2.80
   6   7  -2   52.79    4.20
   6   7  -2   50.29    3.70
   6   7  -2   53.79    3.60
   6   7  -2   55.09    3.70
  -6  -7   2   44.90    3.80
  -6  -7   2   57.39    4.20
   6   6  -2    2.30    1.60
   6   6  -2    2.00    1.30
   6   6  -2    3.40    1.80
  -6  -6   2    0.80    1.60
  -6  -6   2    2.30    1.60
  -6  -6   2   -0.30    0.90
   6   5  -2  285.47   12.90
   6   5  -2  274.67   13.70
   6   5  -2  288.47   12.20
   6   5  -2  267.57   12.10
  -6  -5   2  236.08   12.00
  -6  -5   2  274.17   12.20
  -6  -5   2  286.17   12.80
   6   4  -2   32.20    2.30
   6   4  -2   46.50    2.70
   6   4  -2   44.10    2.80
   6   4  -2   43.30    3.20
  -6  -4   2   39.80    2.80
  -6  -4   2   44.90    2.70
  -6  -4   2   40.60    3.00
   6   3  -2  131.49    6.00
   6   3  -2  132.59    6.50
   6   3  -2  121.89    6.00
  -6  -3   2  125.79    6.00
  -6  -3   2  126.99    5.90
  -6  -3   2  128.69    6.40
   6   2  -2  137.29    5.90
   6   2  -2  140.69    6.40
  -6  -2   2  116.59    5.80
  -6  -2   2  115.39    5.90
   6   1  -2  576.84   23.70
   6   1  -2  544.45   23.70
   6   1  -2  564.84   24.90
  -6  -1   2  561.54   23.60
  -6  -1   2  539.05   23.70
   6   0  -2  177.38    8.40
   6   0  -2  187.28    9.70
   6   0  -2  206.88    8.40
  -6   0   2  191.78    8.40
  -6   0   2  192.38    9.60
   6  -1  -2  592.04   24.60
   6  -1  -2  562.94   24.50
   6  -1  -2  570.14   28.70
  -6   1   2  585.24   24.50
  -6   1   2  587.04   28.70
   6  -2  -2  139.99    7.50
   6  -2  -2  128.39    6.20
   6  -2  -2  147.99    6.30
  -6   2   2  129.09    6.20
  -6   2   2  143.09    6.20
  -6   2   2  132.49    7.30
   6  -3  -2  138.89    6.30
   6  -3  -2  139.29    6.30
   6  -3  -2  132.49    7.60
  -6   3   2  131.99    7.50
  -6   3   2  138.69    6.20
  -6   3   2  134.79    6.20
   6  -4  -2   43.90    2.80
   6  -4  -2   41.20    3.80
   6  -4  -2   51.49    2.80
  -6   4   2   49.80    2.90
  -6   4   2   35.50    3.50
  -6   4   2   48.40    2.70
   6  -5  -2  272.67   12.60
   6  -5  -2  284.27   15.10
   6  -5  -2  284.57   12.60
  -6   5   2  293.47   12.60
  -6   5   2  293.87   15.10
  -6   5   2  293.77   12.70
   6  -6  -2    1.40    1.30
   6  -6  -2    1.40    1.40
   6  -6  -2    1.60    2.10
   6  -6  -2    5.30    1.90
  -6   6   2    1.40    1.30
  -6   6   2    2.00    1.50
  -6   6   2    1.00    1.80
   6  -7  -2   53.39    3.40
   6  -7  -2   49.99    3.40
  -6   7   2   49.80    3.60
   6  -8  -2   24.70    2.20
   6  -8  -2   23.90    2.60
   6  -8  -2   19.60    2.50
  -6   8   2   26.40    2.80
   6  -9  -2   91.99    5.40
   6  -9  -2   99.89    5.50
   6  -9  -2   89.89    4.80
  -6   9   2   96.79    5.50
   6 -10  -2    3.40    2.10
   6 -10  -2    1.30    2.10
  -6  10   2    1.80    2.20
   6 -11  -2   82.79    5.20
  -6  11   2   73.39    5.30
   6 -12  -2   10.30    2.70
  -6  12   2   12.80    3.00
   6 -13  -2   17.50    3.20
  -6  13   2   13.70    3.30
   7  13  -2   39.70    4.90
   7  13  -2   53.89    5.00
  -7 -13   2   39.70    4.50
   7  12  -2   44.40    4.20
   7  12  -2   47.60    5.10
   7  12  -2   45.60    4.60
  -7 -12   2   57.89    5.10
   7  11  -2   91.99    6.00
   7  11  -2   83.89    6.60
  -7 -11   2   96.59    6.10
   7  10  -2  114.59    7.00
   7  10  -2  127.09    6.90
   7  10  -2  117.59    7.50
  -7 -10   2  114.49    6.80
   7   9  -2   98.29    5.60
   7   9  -2  101.29    6.50
   7   9  -2   88.39    5.90
  -7  -9   2  103.79    5.90
   7   8  -2   62.19    4.90
   7   8  -2   57.09    4.10
   7   8  -2   51.79    3.80
  -7  -8   2   54.29    4.20
   7   7  -2  180.08    8.90
   7   7  -2  181.58    9.40
   7   7  -2  182.88    9.60
   7   7  -2  195.98    8.90
  -7  -7   2  179.68    8.90
   7   6  -2   85.79    4.60
   7   6  -2   83.59    5.20
   7   6  -2   72.39    4.50
   7   6  -2   83.69    4.60
  -7  -6   2   88.69    4.80
  -7  -6   2   80.19    4.90
   7   5  -2  349.27   14.50
   7   5  -2  307.67   14.40
   7   5  -2  328.57   15.30
   7   5  -2  324.77   16.20
  -7  -5   2  314.67   14.40
  -7  -5   2  336.87   14.40
  -7  -5   2  321.87   15.20
   7   4  -2  400.86   17.20
   7   4  -2  376.26   18.10
   7   4  -2  414.96   17.20
  -7  -4   2  409.16   17.10
  -7  -4   2  384.46   17.20
  -7  -4   2  380.06   18.00
   7   3  -2  423.66   17.50
   7   3  -2  386.56   17.40
   7   3  -2  403.36   18.40
  -7  -3   2  409.06   17.40
  -7  -3   2  393.86   17.50
   7   2  -2  309.67   13.20
   7   2  -2  286.47   14.00
   7   2  -2  303.87   13.20
  -7  -2   2  301.37   13.20
  -7  -2   2  314.47   13.20
   7   1  -2  719.03   30.50
   7   1  -2  720.53   30.50
   7   1  -2  727.93   32.20
  -7  -1   2  738.43   30.50
  -7  -1   2  695.83   30.50
   7   0  -2  497.95   20.80
   7   0  -2  483.55   24.20
   7   0  -2  488.65   20.80
  -7   0   2  496.85   20.80
  -7   0   2  478.45   20.80
  -7   0   2  485.25   24.20
   7  -1  -2  719.03   31.70
   7  -1  -2  754.32   37.10
   7  -1  -2  752.02   31.70
  -7   1   2  768.32   37.00
  -7   1   2  750.02   31.70
  -7   1   2  752.22   31.70
   7  -2  -2  311.97   13.40
   7  -2  -2  293.87   15.80
   7  -2  -2  311.57   13.40
  -7   2   2  306.37   13.40
  -7   2   2  322.97   13.40
   7  -3  -2  425.96   18.00
   7  -3  -2  401.46   17.90
   7  -3  -2  414.86   21.20
  -7   3   2  432.96   21.10
  -7   3   2  411.06   17.90
  -7   3   2  414.46   17.90
   7  -4  -2  401.66   17.10
   7  -4  -2  375.46   20.40
  -7   4   2  390.06   20.30
  -7   4   2  384.96   17.10
  -7   4   2  433.16   17.20
   7  -5  -2  332.37   17.20
   7  -5  -2  328.17   14.40
   7  -5  -2  319.47   14.30
  -7   5   2  334.27   14.30
  -7   5   2  321.57   17.00
  -7   5   2  330.67   14.40
   7  -6  -2   81.89    6.20
   7  -6  -2   97.49    4.70
   7  -6  -2   85.59    4.70
  -7   6   2   84.99    4.70
   7  -7  -2  178.78    8.70
   7  -7  -2  192.98    8.80
  -7   7   2  191.88    8.90
   7  -8  -2   60.69    4.00
   7  -8  -2   61.29    3.70
   7  -8  -2   58.99    3.90
  -7   8   2   61.39    4.10
   7  -9  -2   92.19    5.40
   7  -9  -2   97.59    5.60
   7  -9  -2   96.19    5.10
  -7   9   2  101.59    5.70
   7 -10  -2  117.29    6.50
   7 -10  -2  120.59    6.60
  -7  10   2  120.29    6.80
   7 -11  -2   74.59    5.40
  -7  11   2   96.79    5.80
   7 -12  -2   48.60    4.30
  -7  12   2   50.79    4.70
   7 -13  -2   43.80    4.20
   8  13  -2   -2.40    3.20
   8  13  -2    4.30    2.90
  -8 -13   2    1.30    2.80
   8  12  -2    8.20    3.40
   8  12  -2    5.30    2.60
   8  12  -2    4.00    2.70
  -8 -12   2    8.60    3.10
   8  11  -2    9.20    2.80
   8  11  -2   14.70    3.40
  -8 -11   2    8.80    3.00
   8  10  -2   56.49    4.60
   8  10  -2   60.29    5.40
  -8 -10   2   52.59    4.60
   8   9  -2    2.40    2.20
   8   9  -2    4.80    2.60
   8   9  -2    0.50    1.40
  -8  -9   2    3.90    2.40
   8   8  -2    1.20    1.30
   8   8  -2    2.60    2.40
   8   8  -2    0.40    1.90
  -8  -8   2    0.00    2.00
   8   7  -2   33.90    3.20
   8   7  -2   38.70    3.40
   8   7  -2   41.70    3.80
   8   7  -2   40.10    2.70
  -8  -7   2   41.50    3.60
   8   6  -2   54.79    4.30
   8   6  -2   61.39    3.80
   8   6  -2   49.30    3.70
   8   6  -2   53.89    3.10
  -8  -6   2   53.89    3.80
   8   5  -2    5.90    2.00
   8   5  -2    6.50    1.70
   8   5  -2    5.20    1.80
  -8  -5   2    6.50    1.80
   8   4  -2  204.58    9.40
   8   4  -2  169.08    8.60
   8   4  -2  189.88    8.70
  -8  -4   2  188.08    8.80
  -8  -4   2  191.28    8.70
   8   3  -2   20.50    2.40
   8   3  -2   27.20    2.30
   8   3  -2   29.80    2.30
  -8  -3   2   26.20    2.20
  -8  -3   2   27.60    2.30
   8   2  -2    5.00    1.30
   8   2  -2   10.10    1.40
   8   2  -2   10.20    1.70
  -8  -2   2   10.00    1.40
  -8  -2   2    6.70    1.40
   8   1  -2    3.70    1.20
   8   1  -2    2.40    1.20
   8   1  -2    2.20    1.60
  -8  -1   2    1.70    1.10
  -8  -1   2    2.40    1.10
   8   0  -2  556.44   27.70
   8   0  -2  595.24   23.90
   8   0  -2  529.15   23.80
  -8   0   2  565.24   23.80
  -8   0   2  548.95   23.80
   8  -1  -2    3.70    1.20
   8  -1  -2    2.50    1.10
   8  -1  -2    2.80    1.30
  -8   1   2    2.30    1.10
  -8   1   2    0.20    1.00
  -8   1   2    1.50    1.00
   8  -2  -2   14.50    1.50
   8  -2  -2    9.30    1.70
   8  -2  -2    6.40    1.30
  -8   2   2   11.60    1.30
  -8   2   2    6.70    1.20
  -8   2   2    4.20    1.00
   8  -3  -2   24.70    2.30
   8  -3  -2   24.50    2.10
   8  -3  -2   25.80    2.80
  -8   3   2   28.10    2.70
  -8   3   2   24.10    2.20
  -8   3   2   24.20    2.00
   8  -4  -2  212.78   11.20
   8  -4  -2  198.78    9.10
  -8   4   2  210.38   11.00
  -8   4   2  198.68    9.10
  -8   4   2  192.88    9.00
   8  -5  -2    6.90    1.50
   8  -5  -2    7.50    2.40
   8  -5  -2    8.40    1.50
  -8   5   2    7.60    2.20
  -8   5   2    7.80    1.50
  -8   5   2    7.60    1.60
   8  -6  -2   50.99    3.50
   8  -6  -2   65.19    5.20
   8  -6  -2   54.89    3.50
  -8   6   2   61.39    3.80
   8  -7  -2   31.70    3.00
   8  -7  -2   37.70    2.90
  -8   7   2   34.00    3.10
   8  -8  -2    3.10    1.80
   8  -8  -2    2.40    1.80
  -8   8   2    2.90    2.00
   8  -9  -2    5.70    2.10
   8  -9  -2    3.20    2.00
   8  -9  -2    2.30    1.40
  -8   9   2    4.20    2.20
   8 -10  -2   53.49    4.20
  -8  10   2   54.09    4.40
   8 -11  -2    9.70    2.50
  -8  11   2    8.40    2.60
   8 -12  -2    7.70    2.50
   8 -13  -2    3.70    2.50
   9  12  -2   11.90    3.10
   9  12  -2   13.30    3.80
  -9 -12   2   16.60    3.50
   9  11  -2   92.49    6.00
   9  11  -2   77.09    6.80
  -9 -11   2   90.19    6.10
   9  10  -2   43.90    4.30
   9  10  -2   46.80    4.70
  -9 -10   2   48.30    4.50
   9   9  -2  142.89    7.40
   9   9  -2  127.99    8.00
  -9  -9   2  133.69    7.50
   9   8  -2   70.59    5.40
   9   8  -2   60.19    4.50
   9   8  -2   64.69    3.90
  -9  -8   2   68.29    4.70
   9   7  -2  114.89    7.10
   9   7  -2  114.39    6.30
   9   7  -2  121.79    6.40
  -9  -7   2  120.29    6.50
   9   6  -2   88.99    5.80
   9   6  -2   96.09    5.10
   9   6  -2   83.89    5.00
  -9  -6   2   82.79    5.10
   9   5  -2  191.68   10.10
   9   5  -2  204.98    9.30
   9   5  -2  199.08    9.30
  -9  -5   2  197.68    9.30
   9   4  -2   98.99    5.20
   9   4  -2  111.09    5.90
   9   4  -2   95.49    5.20
  -9  -4   2   96.29    5.30
   9   3  -2  219.08   11.10
   9   3  -2  226.48   10.30
   9   3  -2  234.28   10.30
  -9  -3   2  235.18   10.30
  -9  -3   2  225.18   10.30
   9   2  -2  107.69    6.10
   9   2  -2  105.19    5.40
   9   2  -2  116.49    5.30
  -9  -2   2  104.19    5.40
  -9  -2   2  112.29    5.40
   9   1  -2  164.98    8.00
   9   1  -2  184.78    8.00
   9   1  -2  168.18    8.80
  -9  -1   2  187.28    8.00
  -9  -1   2  171.78    8.00
   9   0  -2  126.59    6.20
   9   0  -2  142.59    6.20
  -9   0   2  127.69    6.10
  -9   0   2  129.99    6.10
   9  -1  -2  176.08    7.90
   9  -1  -2  174.38    7.90
   9  -1  -2  171.58    9.30
  -9   1   2  174.68    7.90
  -9   1   2  171.28    9.20
  -9   1   2  182.88    7.90
   9  -2  -2  116.39    5.60
   9  -2  -2  125.39    6.70
   9  -2  -2  103.59    5.40
  -9   2   2  113.49    5.40
  -9   2   2  110.19    5.50
  -9   2   2  119.89    6.50
   9  -3  -2  240.58   10.40
   9  -3  -2  216.58   12.30
   9  -3  -2  231.38   10.30
  -9   3   2  243.28   10.30
  -9   3   2  226.88   10.30
  -9   3   2  227.18   12.20
   9  -4  -2   94.79    5.00
   9  -4  -2  103.79    6.50
  -9   4   2   96.59    5.00
  -9   4   2  112.19    6.40
  -9   4   2   97.19    5.00
   9  -5  -2  197.28    9.10
   9  -5  -2  197.78   11.30
   9  -5  -2  211.78    9.10
  -9   5   2  195.18   11.10
  -9   5   2  193.78    9.10
   9  -6  -2   86.69    4.70
   9  -6  -2   83.69    4.60
  -9   6   2   86.79    4.70
   9  -7  -2  117.79    6.00
   9  -7  -2  114.29    5.90
  -9   7   2  109.09    6.00
   9  -8  -2   58.59    4.00
   9  -8  -2   66.09    4.20
  -9   8   2   67.79    4.30
   9  -9  -2  134.39    6.90
  -9   9   2  130.79    7.00
   9 -10  -2   43.20    3.90
  -9  10   2   43.20    3.80
   9 -11  -2   81.49    5.40
   9 -12  -2   11.20    2.70
  10  12  -2   -0.40    2.80
  10  12  -2   -0.60    3.30
 -10 -12   2    1.90    3.00
  10  11  -2   -1.80    3.00
  10  11  -2   -1.70    2.50
 -10 -11   2    3.50    2.80
  10  10  -2    1.60    2.30
  10  10  -2    3.20    2.90
 -10 -10   2   -1.40    2.40
  10   9  -2   -2.90    2.50
  10   9  -2    0.20    2.10
 -10  -9   2   -2.80    2.20
  10   8  -2    0.80    2.10
  10   8  -2    1.30    2.50
 -10  -8   2    0.00    2.20
  10   7  -2    2.60    1.90
  10   7  -2   -0.90    2.30
  10   7  -2    1.80    2.00
 -10  -7   2    1.60    2.00
  10   6  -2    1.30    2.30
  10   6  -2   -0.20    1.80
  10   6  -2   -1.00    1.80
 -10  -6   2    1.00    2.00
  10   5  -2   23.70    3.10
  10   5  -2   23.90    2.60
  10   5  -2   29.20    2.80
 -10  -5   2   28.90    2.90
  10   4  -2    4.10    2.10
  10   4  -2    1.50    1.60
  10   4  -2   -0.50    1.50
 -10  -4   2   -0.60    1.60
  10   3  -2    3.90    1.50
  10   3  -2    8.50    1.70
  10   3  -2    7.60    2.20
 -10  -3   2    6.70    1.60
  10   2  -2    1.90    1.90
  10   2  -2   -0.30    1.20
  10   2  -2   -0.20    1.30
 -10  -2   2    0.30    1.30
  10   1  -2    9.20    1.50
  10   1  -2    8.70    1.50
  10   1  -2   10.10    2.20
 -10  -1   2    4.60    1.40
 -10  -1   2    7.90    1.50
  10   0  -2   10.10    1.50
  10   0  -2    2.90    1.30
 -10   0   2    2.40    1.20
 -10   0   2    5.00    1.30
  10  -1  -2   10.10    1.50
  10  -1  -2    5.00    1.30
 -10   1   2    6.90    1.30
 -10   1   2    4.30    1.30
  10  -2  -2    1.00    1.40
  10  -2  -2    0.80    1.20
  10  -2  -2    1.00    1.70
 -10   2   2    0.60    1.20
 -10   2   2    0.60    1.20
 -10   2   2    1.90    1.50
  10  -3  -2    8.40    2.20
  10  -3  -2    9.50    1.70
  10  -3  -2    5.70    1.50
 -10   3   2    4.20    1.30
 -10   3   2    7.80    1.50
 -10   3   2    6.20    1.80
  10  -4  -2    2.90    2.30
  10  -4  -2    1.70    1.40
 -10   4   2    0.50    1.30
 -10   4   2   -0.50    1.70
  10  -5  -2   24.70    2.30
  10  -5  -2   25.00    2.40
 -10   5   2   26.00    2.40
  10  -6  -2    0.20    1.50
  10  -6  -2   -0.10    1.50
 -10   6   2    1.20    1.60
  10  -7  -2    1.60    1.60
  10  -7  -2    1.20    1.60
 -10   7   2    1.30    1.70
  10  -8  -2   -1.70    1.60
 -10   8   2    0.90    1.90
  10  -9  -2   -1.30    1.70
  10 -10  -2    3.80    2.10
  10 -11  -2   -1.30    2.00
  10 -12  -2    3.70    2.40
  11  11  -2    9.20    3.10
  11  11  -2    2.10    3.40
 -11 -11   2    4.90    2.90
  11  10  -2   81.59    5.50
  11  10  -2   77.99    6.60
 -11 -10   2   71.49    5.60
  11   9  -2   14.10    2.90
  11   9  -2   17.10    3.50
 -11  -9   2   13.90    2.90
  11   8  -2   74.89    5.10
  11   8  -2   75.29    6.10
 -11  -8   2   77.99    5.30
  11   7  -2    3.00    2.00
  11   7  -2   -1.10    2.40
  11   7  -2    1.20    2.00
 -11  -7   2    0.60    2.00
  11   6  -2  144.69    8.40
  11   6  -2  153.48    7.50
  11   6  -2  146.19    7.50
 -11  -6   2  142.39    7.60
  11   5  -2    6.30    1.90
  11   5  -2    4.40    2.00
  11   5  -2    8.70    2.60
 -11  -5   2    5.00    2.10
  11   4  -2  329.17   15.00
  11   4  -2  344.77   15.00
  11   4  -2  332.87   16.10
 -11  -4   2  334.97   15.00
  11   3  -2    9.10    2.40
  11   3  -2    4.90    1.70
  11   3  -2    3.20    1.70
 -11  -3   2    4.80    1.70
  11   2  -2  247.38   12.50
  11   2  -2  254.87   11.40
  11   2  -2  245.18   11.30
 -11  -2   2  260.67   11.40
  11   1  -2   55.89    4.40
  11   1  -2   49.80    3.20
  11   1  -2   36.50    3.00
 -11  -1   2   45.40    3.10
  11   0  -2  198.88    9.10
  11   0  -2  200.68    9.10
 -11   0   2  195.78    9.00
  11  -1  -2   34.20    2.80
  11  -1  -2   49.60    3.10
 -11   1   2   42.20    2.90
  11  -2  -2  253.37   11.30
  11  -2  -2  254.57   11.20
 -11   2   2  245.38   13.10
 -11   2   2  248.58   11.20
  11  -3  -2    6.20    1.80
  11  -3  -2    4.40    1.50
 -11   3   2    2.80    2.00
 -11   3   2    2.80    1.50
  11  -4  -2  339.27   14.80
 -11   4   2  328.67   14.80
 -11   4   2  346.67   17.80
  11  -5  -2    3.90    1.60
  11  -5  -2    5.70    1.70
 -11   5   2    5.60    1.70
  11  -6  -2  157.98    7.40
  11  -6  -2  146.49    7.30
 -11   6   2  146.59    7.30
  11  -7  -2    0.00    1.60
 -11   7   2    1.00    1.70
  11  -8  -2   69.89    4.40
  11  -9  -2   12.50    2.30
  11 -10  -2   73.49    4.90
  11 -11  -2    6.70    2.40
  12  10  -2   -0.90    2.50
  12  10  -2   -2.70    2.90
  12   9  -2    2.20    3.00
  12   9  -2    7.60    2.60
 -12  -9   2    8.20    2.80
  12   8  -2    7.60    2.50
  12   8  -2    4.10    2.90
 -12  -8   2    8.20    2.60
  12   7  -2   43.50    4.10
  12   7  -2   41.40    4.50
 -12  -7   2   48.70    4.20
  12   6  -2    5.40    2.00
  12   6  -2   -0.10    2.40
 -12  -6   2    3.20    2.20
  12   5  -2    2.40    2.40
  12   5  -2    0.60    1.80
  12   5  -2   -0.10    1.80
 -12  -5   2   -1.30    1.90
  12   4  -2   -0.10    1.60
  12   4  -2   -1.40    2.30
  12   4  -2    1.00    1.70
 -12  -4   2    2.80    1.90
  12   3  -2   40.10    3.20
  12   3  -2   34.60    3.10
  12   3  -2   39.40    4.00
 -12  -3   2   42.30    3.30
  12   2  -2   18.60    3.00
  12   2  -2   21.50    2.40
  12   2  -2   20.30    2.30
 -12  -2   2   20.90    2.40
  12   1  -2   49.00    3.40
  12   1  -2   50.89    3.50
  12   1  -2   54.79    4.50
 -12  -1   2   51.59    3.40
  12   0  -2   17.70    2.80
  12   0  -2   12.10    1.80
  12   0  -2   14.50    2.00
 -12   0   2   10.60    1.80
  12  -1  -2   54.39    3.50
  12  -1  -2   53.59    3.40
 -12   1   2   50.99    3.40
  12  -2  -2   24.90    2.40
  12  -2  -2   22.50    2.20
 -12   2   2   19.00    2.10
  12  -3  -2   37.90    2.90
  12  -3  -2   41.50    3.30
 -12   3   2   41.50    2.90
 -12   3   2   38.70    3.70
  12  -4  -2    0.90    1.40
 -12   4   2   -0.20    1.50
  12  -5  -2    1.10    1.50
 -12   5   2    0.40    1.50
  12  -6  -2    3.70    1.70
  12  -7  -2   40.80    3.40
  12  -8  -2    5.00    1.90
  12  -9  -2    6.50    2.10
  12 -10  -2    1.40    2.00
  13   9  -2   35.70    4.00
  13   9  -2   32.60    4.70
  13   8  -2    5.70    3.00
  13   8  -2    1.70    2.30
  13   7  -2   64.69    6.30
  13   7  -2   76.69    5.10
  13   6  -2    9.40    3.00
  13   6  -2    3.40    2.10
 -13  -6   2    5.00    2.20
  13   5  -2  133.89    7.00
  13   5  -2  134.29    8.20
 -13  -5   2  130.49    7.10
  13   4  -2    3.20    2.60
  13   4  -2    4.30    1.80
 -13  -4   2   -2.70    1.80
  13   3  -2  138.69    8.40
  13   3  -2  144.49    7.00
 -13  -3   2  135.69    7.10
  13   2  -2    2.90    2.40
  13   2  -2    1.10    1.60
  13   2  -2    5.20    1.80
 -13  -2   2    2.30    1.60
  13   1  -2   51.49    4.90
  13   1  -2   45.70    3.40
  13   1  -2   49.00    3.50
 -13  -1   2   40.40    3.30
  13   0  -2   16.90    2.90
  13   0  -2   15.20    2.00
  13   0  -2   15.90    2.20
 -13   0   2   10.60    1.90
  13  -1  -2   45.80    3.50
  13  -1  -2   49.00    3.20
 -13   1   2   43.40    3.10
  13  -2  -2    2.30    1.50
  13  -2  -2    5.60    2.00
 -13   2   2    1.90    1.50
  13  -3  -2  137.79    6.70
  13  -4  -2    1.40    1.50
  13  -5  -2  129.79    6.50
  13  -6  -2    6.00    1.80
  13  -7  -2   68.99    4.30
  13  -8  -2    1.30    1.80
  13  -9  -2   37.20    3.50
  14   8  -2   20.50    4.00
  14   8  -2   25.10    3.40
  14   7  -2   -1.30    2.90
  14   7  -2   -1.60    2.10
  14   6  -2   16.90    2.70
  14   6  -2   17.80    3.60
  14   5  -2   20.60    2.70
  14   5  -2   18.00    3.60
  14   4  -2   30.80    3.10
  14   4  -2   26.70    3.90
  14   3  -2    0.50    2.70
  14   3  -2   -1.80    1.60
  14   2  -2   16.80    3.30
  14   2  -2   20.80    2.40
  14   1  -2   57.69    5.40
  14   1  -2   51.69    3.60
  14   0  -2  123.09    7.70
  14   0  -2  123.59    6.30
  14  -1  -2   49.10    3.40
  14  -2  -2   23.70    2.30
  14  -3  -2   -0.40    1.40
  14  -4  -2   29.10    2.60
  14  -5  -2   20.30    2.30
  14  -6  -2   14.80    2.20
  14  -7  -2   -1.90    1.60
  14  -8  -2   26.30    2.90
  15   7  -2    3.60    2.40
  15   7  -2    4.10    3.20
  15   6  -2   22.30    3.10
  15   6  -2   28.60    4.30
  15   5  -2   10.20    3.40
  15   5  -2   14.20    2.50
  15   4  -2   43.40    4.70
  15   4  -2   38.40    3.60
  15   3  -2   16.10    3.60
  15   3  -2   18.70    2.40
  15   2  -2   51.99    5.10
  15   2  -2   46.70    3.70
  15   1  -2   38.50    3.20
  15   1  -2   38.60    4.50
  15   0  -2    0.20    2.60
  15   0  -2    0.90    1.60
  15  -1  -2   38.00    3.20
  15  -1  -2   48.00    4.80
  15  -2  -2   43.80    3.20
  15  -3  -2   18.50    2.20
  15  -4  -2   47.90    3.40
  15  -5  -2    8.80    2.00
  15  -6  -2   21.60    2.50
  15  -7  -2    2.70    1.90
  16   5  -2   21.00    4.10
  16   5  -2   25.80    3.10
  16   4  -2    2.80    3.00
  16   4  -2   -0.30    1.90
  16   3  -2   34.00    3.20
  16   3  -2   30.10    4.40
  16   2  -2   -3.20    2.90
  16   2  -2    1.30    1.70
  16   1  -2   19.20    3.80
  16   1  -2   26.10    2.70
  16   0  -2    9.20    3.20
  16   0  -2   15.60    2.10
  16  -1  -2   28.80    4.30
  16  -1  -2   26.70    2.60
  16  -2  -2    0.50    1.60
  16  -2  -2   -0.60    2.70
  16  -3  -2   31.70    2.90
  16  -4  -2    0.00    1.60
  16  -5  -2   27.90    2.80
  17   2  -2    1.10    1.80
  17   2  -2   -2.00    3.20
  17   1  -2    3.30    3.20
  17   1  -2    6.10    1.90
  17   0  -2    3.50    1.80
  17   0  -2    6.50    3.50
  17  -1  -2    7.80    3.40
  17  -1  -2    2.10    1.80
  17  -2  -2   -0.30    3.10
  17  -2  -2    1.10    1.60
  16  -3   3    2.10    3.10
  16  -2   3   -5.40    2.70
  16  -1   3   -2.10    3.00
  16  -1   3   -0.80    1.20
  16   0   3    0.90    1.30
  16   0   3   -3.70    3.00
  16   1   3   -0.80    3.10
  16   1   3   -1.00    1.30
  16   2   3   -5.50    2.90
  16   2   3   -0.10    1.50
  16   3   3    2.70    1.70
  16   3   3   -1.30    3.10
  15  -6   3   -2.70    3.10
  15  -5   3   -1.50    2.90
  15  -4   3   -2.40    2.60
  15  -4   3   -1.90    1.10
  15  -3   3    2.60    2.80
  15  -3   3   -0.50    2.50
  15  -3   3    0.80    1.10
  15  -2   3   -1.00    1.00
  15  -2   3    1.90    3.00
  15  -1   3    0.90    1.20
  15  -1   3   -0.60    2.70
  15   0   3    0.80    2.90
  15   0   3    1.90    1.30
  15   1   3    0.80    3.10
  15   1   3    3.30    1.40
  15   2   3   -2.80    2.90
  15   2   3   -0.10    1.40
  15   3   3    1.30    1.60
  15   3   3    2.90    3.10
  15   4   3    0.80    3.10
  15   4   3    0.30    1.70
  15   5   3   -1.60    3.10
  15   5   3    0.10    1.70
  15   6   3   -1.40    1.90
  15   6   3   -2.00    3.30
  14  -7   3   -2.90    3.20
  14  -7   3    0.70    1.40
  14  -6   3    2.80    3.10
  14  -6   3   -0.30    1.20
  14  -5   3   -1.50    1.10
  14  -5   3   -1.90    2.60
  14  -4   3   -2.10    2.50
  14  -4   3    1.50    1.10
  14  -3   3    1.10    1.10
  14  -3   3    1.60    2.40
  14  -2   3    0.50    1.10
  14  -2   3   -2.90    2.50
  14  -2   3   -3.40    2.10
  14  -1   3   -0.10    1.10
  14  -1   3   -0.30    2.00
  14  -1   3   -2.40    2.50
  14   0   3   -0.70    2.70
  14   0   3    0.60    1.20
  14   0   3   -1.10    1.90
  14   1   3    6.00    3.00
  14   1   3    0.60    1.30
  14   2   3    0.40    2.90
  14   2   3   -0.30    1.40
  14   3   3   -0.10    2.70
  14   3   3   -0.70    1.40
  14   4   3   -0.50    2.90
  14   4   3    0.70    1.60
  14   5   3    4.30    3.30
  14   5   3   -0.10    1.70
  14   6   3    0.50    3.00
  14   6   3    1.10    2.00
  14   7   3    2.60    2.20
  14   7   3    0.00    3.40
  13  -9   3    0.80    1.70
  13  -8   3    2.90    1.60
  13  -8   3   -1.70    3.20
  13  -7   3    1.10    1.40
  13  -7   3   -1.90    3.10
  13  -6   3   -0.60    1.20
  13  -6   3   -0.20    2.80
  13  -5   3    1.00    1.20
  13  -5   3    2.30    2.70
  13  -4   3    3.70    2.50
  13  -4   3    2.10    1.20
  13  -3   3   -1.30    2.30
  13  -3   3   -0.70    1.00
  13  -2   3   -0.70    2.20
  13  -2   3    0.10    1.10
  13  -1   3    0.90    2.00
  13  -1   3    1.50    2.60
  13  -1   3    2.00    1.10
  13   0   3    3.80    2.70
  13   0   3    0.20    1.80
  13   0   3   -0.20    1.10
  13   1   3   -0.80    1.60
  13   1   3    2.70    1.30
  13   1   3    2.40    2.60
  13   2   3   -0.10    1.30
  13   2   3    2.00    2.70
  13   2   3   -0.50    1.40
  13   3   3    0.90    1.40
  13   3   3   -3.40    2.50
  13   4   3    1.40    1.70
  13   4   3    4.00    2.90
  13   5   3   -1.00    1.70
  13   5   3    3.80    3.10
  13   6   3    2.90    3.10
  13   6   3   -0.70    1.80
  13   7   3   -1.50    2.00
  13   7   3    0.60    3.00
  13   8   3   -0.40    3.10
  13   8   3    2.40    2.20
  13   9   3   -2.60    3.20
  13   9   3   -1.80    2.30
  12 -10   3   -0.50    1.80
  12 -10   3   -3.00    3.60
  12  -9   3    1.90    3.50
  12  -9   3    1.50    1.60
  12  -8   3    0.30    3.20
  12  -8   3    2.00    1.50
  12  -7   3    0.00    1.40
  12  -7   3    0.60    3.00
  12  -6   3    1.60    1.30
  12  -6   3    1.10    2.70
  12  -5   3    1.70    1.20
  12  -5   3    3.40    2.70
 -12   4  -3    1.20    0.80
  12  -4   3    0.60    2.50
  12  -4   3    0.20    1.10
 -12   3  -3    0.80    0.70
  12  -3   3    1.70    2.30
  12  -3   3    0.70    1.00
  12  -3   3    0.60    1.00
 -12   2  -3    1.00    0.80
 -12   2  -3    1.30    0.70
  12  -2   3   -1.50    2.10
  12  -2   3   -0.90    1.00
  12  -2   3   -0.60    1.10
 -12   1  -3    0.20    0.80
 -12   1  -3    1.30    0.80
  12  -1   3    1.30    2.00
  12  -1   3    2.00    1.10
  12  -1   3    4.50    2.50
  12  -1   3    0.50    1.20
 -12   0  -3   -1.20    0.90
 -12   0  -3    0.10    1.00
  12   0   3    0.00    1.10
  12   0   3    0.00    1.20
  12   0   3   -1.90    2.30
  12   0   3   -1.50    1.70
 -12  -1  -3    0.30    1.10
  12   1   3    3.70    1.30
  12   1   3   -0.30    2.40
  12   1   3    0.40    1.20
  12   1   3    1.30    1.50
 -12  -2  -3    1.20    1.30
  12   2   3    0.70    1.30
  12   2   3   -0.20    1.30
  12   2   3    2.20    2.60
  12   2   3    1.10    1.30
 -12  -3  -3    1.70    1.40
  12   3   3    2.40    2.50
  12   3   3    2.90    1.50
  12   3   3    0.90    1.20
 -12  -4  -3    0.00    1.60
  12   4   3   -1.20    1.50
  12   4   3    0.00    2.60
  12   5   3    2.60    2.70
  12   5   3    2.50    1.70
  12   6   3    1.30    1.80
  12   6   3    1.50    2.90
  12   7   3   -0.10    1.90
  12   7   3    0.50    2.90
  12   8   3   -0.20    3.10
  12   8   3    2.90    2.20
  12   9   3   -4.00    2.90
  12   9   3    1.40    2.30
  12  10   3   -1.50    2.90
  12  10   3   -0.70    2.40
  12  10   3   -1.00    3.30
  11 -10   3    4.80    1.90
  11 -10   3    3.40    3.80
  11  -9   3   -3.10    3.30
  11  -9   3    0.00    1.60
  11  -8   3    2.70    3.10
  11  -8   3    0.30    1.50
  11  -7   3    1.60    2.90
  11  -7   3    1.60    1.40
  11  -6   3    1.10    1.30
  11  -6   3    3.20    2.70
  11  -5   3    6.70    1.30
  11  -5   3    2.60    2.70
  11  -5   3    3.10    1.20
 -11   4  -3    5.30    1.00
 -11   4  -3    3.90    0.90
  11  -4   3    4.60    2.50
  11  -4   3    3.50    1.20
  11  -4   3    4.00    1.10
 -11   3  -3    3.20    0.90
 -11   3  -3    1.70    0.80
  11  -3   3    2.30    2.30
  11  -3   3    2.60    1.00
  11  -3   3    2.60    1.10
 -11   2  -3    3.60    0.90
 -11   2  -3    2.20    0.80
  11  -2   3    4.10    2.20
  11  -2   3    3.10    1.10
  11  -2   3    0.70    1.20
 -11   1  -3   -0.60    0.80
 -11   1  -3   -1.10    0.80
  11  -1   3    0.40    1.10
  11  -1   3    0.30    1.90
  11  -1   3   -1.00    2.20
  11  -1   3    0.90    1.00
 -11   0  -3    1.90    1.00
 -11   0  -3    0.40    1.00
  11   0   3    0.70    1.10
  11   0   3    0.50    1.60
  11   0   3    3.20    2.30
  11   0   3    2.00    1.20
 -11  -1  -3    1.40    1.10
 -11  -1  -3    0.40    1.10
  11   1   3    1.50    1.20
  11   1   3    0.60    1.50
  11   1   3    2.60    2.30
  11   1   3    3.10    1.30
 -11  -2  -3    3.10    1.30
  11   2   3    5.20    2.60
  11   2   3    2.90    1.30
  11   2   3    2.80    1.40
  11   2   3    4.40    1.40
 -11  -3  -3    4.30    1.50
  11   3   3    3.20    1.20
  11   3   3    4.70    2.50
  11   3   3    3.00    1.50
  11   3   3    3.90    1.50
 -11  -4  -3    4.70    1.70
  11   4   3    4.70    2.60
  11   4   3    3.80    1.60
  11   4   3    4.60    1.60
  11   4   3    3.40    1.10
 -11  -5  -3    8.60    2.00
  11   5   3    8.70    2.80
  11   5   3    7.30    1.20
  11   5   3    2.90    1.80
  11   5   3    7.20    1.90
 -11  -6  -3    0.90    1.80
  11   6   3    3.90    2.80
  11   6   3    2.00    1.80
 -11  -7  -3    2.90    2.00
  11   7   3    6.40    2.90
  11   7   3    1.90    1.90
 -11  -8  -3    0.30    2.10
  11   8   3    3.50    2.20
  11   8   3   -0.10    2.80
  11   9   3    0.80    2.30
  11   9   3    0.00    3.00
  11  10   3    4.50    3.30
  11  10   3    9.80    2.80
  11  10   3    5.90    3.10
  10 -11   3    0.50    3.70
  10 -11   3    1.80    2.00
  10 -10   3   -3.90    3.30
  10 -10   3    0.30    1.80
  10  -9   3    1.70    3.30
  10  -9   3    0.70    1.60
  10  -8   3    1.20    2.90
  10  -8   3    2.00    1.50
  10  -7   3    0.90    1.30
  10  -7   3    1.40    2.80
 -10   6  -3    1.60    1.30
  10  -6   3    2.00    2.70
  10  -6   3   -0.50    1.20
  10  -6   3   -1.20    1.20
 -10   5  -3    2.40    1.10
  10  -5   3    8.30    2.70
  10  -5   3    3.00    1.20
  10  -5   3   -0.20    1.10
 -10   4  -3    0.20    0.90
 -10   4  -3    1.80    0.90
  10  -4   3    0.30    1.10
  10  -4   3    2.80    2.40
  10  -4   3    0.80    1.00
 -10   3  -3    1.10    0.80
 -10   3  -3    0.70    0.70
  10  -3   3    0.40    0.90
  10  -3   3   -1.20    2.00
  10  -3   3    0.80    1.00
 -10   2  -3    3.80    0.80
 -10   2  -3    3.80    0.80
  10  -2   3    3.30    1.10
  10  -2   3    4.50    2.00
  10  -2   3    4.00    1.00
 -10   1  -3   -0.40    0.80
 -10   1  -3   -0.50    0.70
  10  -1   3   -1.50    1.00
  10  -1   3    0.30    0.90
  10  -1   3    1.00    1.70
 -10   0  -3    0.50    0.90
 -10   0  -3    1.10    0.90
  10   0   3   -0.30    1.10
  10   0   3    0.40    0.90
  10   0   3    1.10    1.50
  10   0   3    1.50    2.00
 -10  -1  -3    0.00    1.00
 -10  -1  -3   -1.90    0.90
  10   1   3   -0.20    1.10
  10   1   3    0.60    1.10
  10   1   3   -0.40    1.30
  10   1   3    0.90    2.00
 -10  -2  -3    6.20    1.30
 -10  -2  -3    4.50    1.30
  10   2   3    5.40    1.40
  10   2   3    4.90    1.30
  10   2   3    6.00    2.50
  10   2   3    5.90    1.40
 -10  -3  -3   -0.50    1.30
  10   3   3    2.90    2.20
  10   3   3    0.60    1.30
  10   3   3    0.10    1.40
  10   3   3   -0.60    1.10
 -10  -4  -3   -1.30    1.40
  10   4   3    0.40    1.50
  10   4   3    1.10    1.50
  10   4   3    2.30    2.30
 -10  -5  -3    2.80    1.80
  10   5   3    2.80    1.70
  10   5   3   10.00    2.60
  10   5   3    1.60    1.70
 -10  -6  -3    1.30    1.80
  10   6   3   -1.00    2.40
  10   6   3    1.90    1.70
  10   6   3   -1.90    1.60
 -10  -7  -3    1.50    2.00
  10   7   3   -0.40    2.50
  10   7   3   -0.80    1.80
  10   7   3   -2.50    1.80
 -10  -8  -3    1.30    2.10
  10   8   3   -1.00    2.70
  10   8   3    4.40    2.20
 -10  -9  -3    3.10    2.30
  10   9   3    1.50    2.20
  10   9   3   -0.20    2.90
 -10 -10  -3    1.70    2.40
  10  10   3    2.80    3.10
  10  10   3    2.80    2.40
  10  10   3    0.70    2.70
  10  11   3   -2.00    2.50
  10  11   3    1.10    3.30
  10  11   3    0.20    2.50
   9 -12   3   -4.20    2.00
   9 -11   3    7.30    3.70
   9 -11   3    2.60    2.00
   9 -10   3    0.60    1.80
   9 -10   3    0.60    3.30
   9  -9   3    2.30    1.70
   9  -9   3    1.20    3.20
  -9   8  -3    3.00    1.80
   9  -8   3    1.90    3.00
   9  -8   3    0.10    1.40
  -9   7  -3    1.30    1.40
   9  -7   3    1.50    1.50
   9  -7   3    0.80    2.80
   9  -7   3    4.10    1.50
  -9   6  -3    1.20    1.30
   9  -6   3    2.40    1.30
   9  -6   3    2.20    2.70
   9  -6   3    2.40    1.40
  -9   5  -3    1.80    1.00
  -9   5  -3    3.30    1.20
   9  -5   3    2.30    2.50
   9  -5   3    1.30    1.10
   9  -5   3    1.70    1.20
  -9   4  -3    8.10    1.10
  -9   4  -3    5.40    1.00
   9  -4   3    6.50    1.20
   9  -4   3    6.00    1.10
   9  -4   3    5.50    2.40
  -9   3  -3    3.40    0.80
  -9   3  -3    4.00    0.90
   9  -3   3    3.20    0.90
   9  -3   3    3.20    2.00
   9  -3   3    3.70    1.00
  -9   2  -3    1.20    0.70
  -9   2  -3    0.80    0.70
   9  -2   3    1.40    1.70
   9  -2   3    0.50    0.80
   9  -2   3    0.90    1.00
  -9   1  -3    1.50    0.70
  -9   1  -3    2.60    0.70
   9  -1   3    1.30    0.90
   9  -1   3    3.70    1.00
   9  -1   3    1.40    1.50
  -9   0  -3    1.00    0.80
  -9   0  -3    0.10    0.80
   9   0   3   -0.50    0.80
   9   0   3    1.50    1.30
   9   0   3   -0.60    1.80
   9   0   3    0.30    0.90
  -9  -1  -3    1.80    1.00
  -9  -1  -3    0.90    1.00
   9   1   3    0.60    1.70
   9   1   3    3.70    1.30
   9   1   3    2.20    1.00
   9   1   3    2.10    1.00
  -9  -2  -3    0.50    1.00
  -9  -2  -3    0.50    1.10
   9   2   3   -0.30    1.10
   9   2   3    2.80    1.10
   9   2   3    1.60    2.00
   9   2   3   -0.20    1.00
  -9  -3  -3    3.80    1.20
  -9  -3  -3    5.60    1.40
   9   3   3    4.80    2.00
   9   3   3    4.00    1.30
   9   3   3    3.80    1.30
  -9  -4  -3    5.60    1.50
   9   4   3    5.70    1.60
   9   4   3    8.40    1.60
   9   4   3    2.90    2.10
  -9  -5  -3    1.40    1.60
   9   5   3    0.60    1.60
   9   5   3    2.80    1.60
   9   5   3    3.00    2.30
  -9  -6  -3    2.90    1.90
   9   6   3    4.30    1.80
   9   6   3    1.40    1.80
   9   6   3    3.90    2.40
  -9  -7  -3    4.80    2.10
   9   7   3    7.90    2.70
   9   7   3    3.40    1.80
   9   7   3    1.70    2.00
   9   7   3    3.30    1.50
  -9  -8  -3    1.80    2.10
   9   8   3    2.60    2.60
   9   8   3    0.70    1.90
   9   8   3    0.00    1.90
  -9  -9  -3    1.90    2.20
   9   9   3    2.90    2.30
   9   9   3    4.20    2.80
  -9 -10  -3    1.20    2.20
   9  10   3    1.50    2.50
   9  10   3   -1.40    2.90
   9  10   3    3.80    2.30
  -9 -11  -3    3.50    2.50
   9  11   3    1.20    2.40
   9  11   3    1.90    3.10
   9  11   3    1.50    2.60
  -9 -12  -3    1.70    2.80
   9  12   3    1.50    2.60
   9  12   3   -0.20    2.60
   9  12   3   -1.60    3.60
   8 -12   3    0.30    2.10
   8 -12   3   -0.90    3.60
   8 -11   3   -1.70    3.40
   8 -11   3    1.80    1.90
   8 -10   3   -0.10    3.00
   8 -10   3    0.10    1.80
  -8   9  -3    1.00    1.70
   8  -9   3    4.40    1.70
   8  -9   3    2.90    3.00
  -8   8  -3    6.10    1.80
   8  -8   3    2.50    3.00
   8  -8   3    3.20    1.70
   8  -8   3    2.40    1.60
  -8   7  -3   12.70    1.90
   8  -7   3   14.70    3.20
   8  -7   3   11.30    1.80
   8  -7   3   11.10    1.90
  -8   6  -3    0.30    1.20
  -8   6  -3    0.80    1.30
   8  -6   3    2.10    1.30
   8  -6   3   -0.70    1.20
   8  -6   3    4.30    2.50
  -8   5  -3    2.30    1.10
   8  -5   3   13.10    2.60
   8  -5   3    5.60    1.20
   8  -5   3    1.30    1.10
  -8   4  -3    0.60    1.80
  -8   4  -3    1.60    0.90
  -8   4  -3    1.30    0.80
   8  -4   3    0.30    0.90
   8  -4   3    2.90    2.00
   8  -4   3    0.90    0.90
  -8   3  -3    0.50    0.80
  -8   3  -3    1.40    0.70
   8  -3   3    0.40    0.80
   8  -3   3    1.80    0.90
   8  -3   3    0.30    1.70
  -8   2  -3    1.40    0.60
  -8   2  -3   -0.50    0.60
   8  -2   3    1.70    1.60
   8  -2   3    0.60    0.80
   8  -2   3    1.20    0.80
  -8   1  -3    3.60    0.60
  -8   1  -3    3.10    0.70
   8  -1   3    3.70    1.50
   8  -1   3    3.40    0.90
   8  -1   3    2.20    0.80
  -8   0  -3    1.30    0.80
  -8   0  -3    0.70    0.70
   8   0   3    0.20    0.80
   8   0   3    1.20    0.80
   8   0   3   -0.20    1.70
   8   0   3    0.70    1.20
  -8  -1  -3    2.30    0.90
  -8  -1  -3    4.00    0.90
   8   1   3    2.90    1.80
   8   1   3    2.50    1.00
   8   1   3    2.70    0.90
   8   1   3    2.60    1.10
  -8  -2  -3    1.50    1.00
  -8  -2  -3    1.10    0.90
   8   2   3   -0.50    1.00
   8   2   3    0.80    1.00
   8   2   3    1.40    1.80
  -8  -3  -3    2.70    1.00
  -8  -3  -3    1.40    1.10
   8   3   3    2.50    1.70
   8   3   3    2.80    1.20
   8   3   3   -0.50    1.10
  -8  -4  -3    1.00    1.30
  -8  -4  -3    1.60    1.20
   8   4   3    0.50    1.30
   8   4   3    3.00    2.00
   8   4   3    2.60    1.30
  -8  -5  -3    6.10    1.60
   8   5   3    1.60    1.50
  -8  -6  -3    0.20    1.70
   8   6   3    3.00    1.60
   8   6   3    4.60    2.20
   8   6   3    2.30    1.70
  -8  -7  -3    8.70    2.10
   8   7   3   11.90    2.30
   8   7   3   16.40    3.00
   8   7   3   13.50    1.90
   8   7   3    9.00    2.10
  -8  -8  -3    4.50    2.20
   8   8   3    6.80    1.80
   8   8   3    6.00    2.70
   8   8   3    4.20    2.20
   8   8   3    4.10    1.90
  -8  -9  -3    0.40    2.10
   8   9   3    0.20    2.10
   8   9   3   -0.40    2.70
  -8 -10  -3    1.50    2.20
   8  10   3   -3.80    2.20
   8  10   3    1.10    2.30
   8  10   3   -0.60    2.80
  -8 -11  -3   -0.30    2.40
   8  11   3   -2.40    2.40
   8  11   3   -1.80    3.00
   8  11   3    2.60    2.40
  -8 -12  -3    2.10    2.70
   8  12   3    1.10    2.70
   8  12   3    1.90    2.60
   8  12   3   -0.40    3.30
   7 -13   3    3.10    2.40
   7 -12   3    0.00    2.10
   7 -12   3   -4.20    3.50
   7 -11   3    2.40    2.00
   7 -11   3   -3.70    3.10
  -7  10  -3   30.80    3.10
   7 -10   3   27.80    2.90
   7 -10   3   21.20    4.20
  -7   9  -3    4.70    2.00
   7  -9   3    8.40    2.00
   7  -9   3    5.90    1.90
   7  -9   3    4.90    3.00
  -7   8  -3    7.10    1.80
   7  -8   3    5.00    3.00
   7  -8   3    3.70    1.70
   7  -8   3    3.70    1.70
  -7   7  -3    4.00    1.60
   7  -7   3    2.50    2.80
   7  -7   3    6.30    1.60
   7  -7   3    3.90    1.50
  -7   6  -3    1.00    1.10
  -7   6  -3    3.80    1.30
   7  -6   3    3.40    2.40
   7  -6   3   -0.80    1.20
   7  -6   3    1.20    1.20
  -7   5  -3   10.20    1.40
  -7   5  -3   10.70    2.30
  -7   5  -3   10.80    1.40
   7  -5   3   10.00    2.40
   7  -5   3   11.50    1.40
   7  -5   3   11.90    1.40
  -7   4  -3   11.30    1.20
  -7   4  -3   14.10    2.20
  -7   4  -3   10.70    1.20
   7  -4   3   10.70    2.30
   7  -4   3   12.00    1.30
   7  -4   3   12.60    1.30
  -7   3  -3   12.70    1.00
  -7   3  -3   12.60    1.10
   7  -3   3   13.10    2.10
   7  -3   3   10.90    1.10
   7  -3   3   10.00    1.10
  -7   2  -3    7.70    0.80
   7  -2   3    7.90    0.90
   7  -2   3    5.80    1.60
  -7   1  -3    7.70    0.80
  -7   1  -3    9.70    0.80
   7  -1   3    8.80    1.70
   7  -1   3   10.40    1.00
   7  -1   3    8.70    1.00
  -7   0  -3   -0.30    0.30
  -7   0  -3   -1.00    0.60
   7   0   3    0.70    0.70
   7   0   3    0.90    1.10
   7   0   3    0.60    1.50
   7   0   3    1.20    0.70
  -7  -1  -3    9.40    1.00
  -7  -1  -3    8.20    1.00
   7   1   3    6.90    1.00
   7   1   3    9.30    1.30
   7   1   3   10.10    1.10
   7   1   3    7.40    1.90
  -7  -2  -3    6.80    1.10
  -7  -2  -3   11.30    1.20
   7   2   3    7.80    1.20
   7   2   3    6.10    1.70
   7   2   3    7.40    1.20
  -7  -3  -3   14.80    1.50
  -7  -3  -3   12.40    1.50
   7   3   3   12.30    2.00
   7   3   3   13.30    1.50
   7   3   3   12.70    1.50
  -7  -4  -3   13.50    1.60
  -7  -4  -3   10.60    1.70
   7   4   3   14.40    2.40
   7   4   3   11.00    1.60
   7   4   3   11.30    1.60
  -7  -5  -3    7.90    1.70
   7   5   3    9.90    1.70
   7   5   3   11.20    2.20
   7   5   3   11.10    1.70
  -7  -6  -3    1.30    1.70
   7   6   3    1.80    1.50
   7   6   3    4.10    2.00
   7   6   3    0.30    1.60
  -7  -7  -3    7.40    2.10
   7   7   3    3.70    2.40
   7   7   3    7.50    1.70
   7   7   3    5.40    1.80
   7   7   3    6.80    2.00
  -7  -8  -3    3.10    2.10
   7   8   3    6.20    1.80
   7   8   3    7.60    2.20
   7   8   3    3.70    2.60
   7   8   3    2.10    1.80
  -7  -9  -3    5.40    2.30
   7   9   3    8.50    2.90
   7   9   3    5.30    2.30
   7   9   3    1.80    1.80
   7   9   3    4.20    2.40
  -7 -10  -3   24.50    3.20
   7  10   3   28.50    3.90
   7  10   3   30.50    3.40
   7  10   3   22.40    3.30
  -7 -11  -3   -0.80    2.40
   7  11   3    5.40    2.50
   7  11   3    3.90    2.50
   7  11   3   -1.80    3.00
  -7 -12  -3    5.50    2.80
   7  12   3    1.60    3.20
   7  12   3   -2.70    2.40
   7  12   3    4.60    2.60
  -7 -13  -3    6.10    2.90
   7  13   3    0.50    3.50
   7  13   3    0.00    2.60
   7  13   3   -0.70    2.80
   6 -13   3    5.00    2.50
   6 -12   3    2.50    2.10
   6 -12   3   -0.50    3.30
   6 -11   3   -2.60    3.00
   6 -11   3   -0.30    1.90
   6 -10   3   -3.00    2.90
   6 -10   3   -1.00    1.70
   6 -10   3    0.10    1.80
   6  -9   3    6.70    1.90
   6  -9   3    6.20    1.90
   6  -9   3   12.10    3.20
   6  -8   3    9.70    3.00
   6  -8   3    1.70    1.60
   6  -8   3    4.20    1.60
  -6   7  -3    8.30    1.70
   6  -7   3    3.70    1.50
   6  -7   3   14.00    3.00
  -6   6  -3   12.90    1.70
  -6   6  -3   14.00    1.70
   6  -6   3   12.30    1.70
   6  -6   3   12.70    1.60
   6  -6   3   13.70    2.70
  -6   5  -3    1.30    1.10
  -6   5  -3   -1.50    0.90
  -6   5  -3    1.70    1.70
   6  -5   3    3.30    1.90
   6  -5   3    1.60    1.10
   6  -5   3    0.10    1.10
  -6   4  -3    3.30    0.90
  -6   4  -3    3.70    1.00
  -6   4  -3    3.10    1.60
   6  -4   3    4.20    1.80
   6  -4   3    1.40    0.90
   6  -4   3    1.60    0.90
  -6   3  -3    0.40    0.30
  -6   3  -3    0.90    0.70
  -6   3  -3    2.20    1.40
   6  -3   3   -0.70    0.70
   6  -3   3    1.80    0.80
   6  -3   3    1.70    1.60
  -6   2  -3    3.30    0.70
  -6   2  -3    3.60    0.60
   6  -2   3    4.50    0.80
   6  -2   3    4.30    1.60
  -6   1  -3    2.00    0.60
  -6   1  -3    2.90    0.50
   6  -1   3    2.40    0.70
   6  -1   3    2.00    0.70
   6  -1   3    0.40    1.30
  -6   0  -3    0.30    0.60
  -6   0  -3   -0.90    0.60
   6   0   3   -0.70    1.00
   6   0   3   -0.40    0.60
   6   0   3    0.30    0.70
   6   0   3   -1.20    1.30
  -6  -1  -3    2.10    0.80
   6   1   3    3.40    1.50
   6   1   3    1.30    0.90
   6   1   3    3.90    0.90
  -6  -2  -3    3.60    1.00
  -6  -2  -3    4.10    0.90
   6   2   3    5.90    1.50
   6   2   3    3.20    0.90
   6   2   3    2.10    1.00
  -6  -3  -3    1.00    1.00
  -6  -3  -3    1.50    0.80
  -6  -3  -3   -0.20    1.10
   6   3   3    0.80    1.00
   6   3   3    1.30    1.00
   6   3   3    0.60    1.40
  -6  -4  -3    3.00    1.30
  -6  -4  -3    3.70    1.10
  -6  -4  -3    0.60    0.90
   6   4   3    1.40    1.20
   6   4   3    2.70    1.20
   6   4   3    2.40    1.60
  -6  -5  -3   -0.70    1.40
  -6  -5  -3   -0.30    1.20
  -6  -5  -3    1.20    1.50
   6   5   3   -0.60    1.40
   6   5   3    2.50    1.70
   6   5   3    1.30    1.30
  -6  -6  -3   15.90    2.20
   6   6   3   10.30    2.00
   6   6   3   17.40    2.40
   6   6   3   13.70    2.00
  -6  -7  -3    6.20    1.90
   6   7   3    5.90    1.80
   6   7   3    0.40    1.80
  -6  -8  -3    1.40    2.00
   6   8   3    2.50    2.10
   6   8   3    3.50    1.70
   6   8   3    1.40    1.70
   6   8   3    4.90    2.50
  -6  -9  -3    7.00    2.40
   6   9   3    4.40    2.30
   6   9   3   14.00    3.00
   6   9   3   11.80    2.30
   6   9   3    7.30    2.30
  -6 -10  -3   -0.20    2.30
   6  10   3    2.80    2.80
   6  10   3    0.70    2.20
   6  10   3   -0.60    2.10
  -6 -11  -3    0.50    2.40
   6  11   3   -1.40    2.70
   6  11   3    3.20    2.30
   6  11   3    0.20    2.50
  -6 -12  -3    7.50    2.90
   6  12   3    0.60    3.10
   6  12   3    4.90    2.50
   6  12   3    3.70    2.70
  -6 -13  -3    1.60    2.80
   6  13   3    4.90    2.60
   6  13   3   -1.70    2.70
   6  13   3    4.00    3.40
   5 -14   3   -1.50    2.30
   5 -13   3    1.20    2.30
  -5  12  -3   -1.70    2.20
   5 -12   3    0.00    3.40
   5 -12   3   -3.10    2.10
  -5  11  -3    0.80    1.90
   5 -11   3   -0.70    3.10
   5 -11   3    1.70    2.00
  -5  10  -3   -1.00    1.80
   5 -10   3    1.20    3.10
   5 -10   3    1.00    1.90
   5 -10   3    0.00    1.80
  -5   9  -3    0.50    1.70
   5  -9   3    2.40    1.80
   5  -9   3    5.00    1.90
   5  -9   3    4.90    3.00
  -5   8  -3    0.40    1.50
   5  -8   3    1.80    1.60
   5  -8   3    0.40    1.60
   5  -8   3    0.90    2.50
  -5   7  -3    8.30    1.60
   5  -7   3    9.60    2.10
   5  -7   3   15.10    2.80
   5  -7   3   11.70    1.80
   5  -7   3    9.70    1.70
  -5   6  -3    7.10    1.30
  -5   6  -3    3.70    1.80
   5  -6   3    5.80    1.40
   5  -6   3    7.30    2.00
   5  -6   3    8.20    1.50
   5  -6   3    5.40    2.20
  -5   5  -3    4.10    1.20
  -5   5  -3    2.70    1.10
  -5   5  -3    5.40    1.70
   5  -5   3    8.60    2.10
   5  -5   3    2.10    1.10
   5  -5   3    4.40    1.10
  -5   4  -3   24.60    1.80
  -5   4  -3   23.10    1.80
  -5   4  -3   25.30    2.70
   5  -4   3   24.40    1.80
   5  -4   3   29.90    3.00
   5  -4   3   28.70    1.80
  -5   3  -3   18.00    1.40
  -5   3  -3   17.80    2.20
   5  -3   3   17.00    2.20
   5  -3   3   15.80    1.40
   5  -3   3   17.10    1.40
  -5   2  -3  120.29    5.20
  -5   2  -3  122.39    5.20
   5  -2   3  124.19    5.30
   5  -2   3  119.79    6.70
   5  -2   3  116.29    5.20
  -5   1  -3    6.90    0.60
  -5   1  -3    8.40    0.70
   5  -1   3    8.80    1.40
   5  -1   3   10.00    0.80
   5  -1   3    8.60    0.70
  -5   0  -3   -0.40    0.50
  -5   0  -3   -0.10    0.50
   5   0   3   -0.40    1.10
   5   0   3    0.00    0.90
   5   0   3   -0.30    0.50
   5   0   3    0.30    0.50
  -5  -1  -3    9.10    0.90
  -5  -1  -3    7.00    0.90
   5   1   3    9.40    0.90
   5   1   3    6.80    1.40
   5   1   3    9.40    0.90
  -5  -2  -3  130.79    6.20
  -5  -2  -3  112.69    5.60
   5   2   3  130.59    5.60
   5   2   3  123.09    6.20
   5   2   3  119.29    5.60
  -5  -3  -3   18.30    1.50
  -5  -3  -3   19.70    1.70
   5   3   3   17.90    1.60
   5   3   3   16.70    2.10
   5   3   3   16.40    1.60
  -5  -4  -3   27.40    2.20
  -5  -4  -3   28.50    2.20
   5   4   3   23.00    2.20
   5   4   3   29.70    2.30
   5   4   3   22.90    2.30
  -5  -5  -3    1.40    1.30
  -5  -5  -3    1.60    1.40
  -5  -5  -3    3.40    1.40
   5   5   3    2.40    1.40
   5   5   3    4.30    1.70
   5   5   3    3.70    1.40
  -5  -6  -3    4.00    1.70
  -5  -6  -3    6.50    1.60
  -5  -6  -3    9.40    2.00
   5   6   3    4.70    1.70
   5   6   3    6.50    1.60
   5   6   3    7.60    2.00
  -5  -7  -3    8.80    2.00
   5   7   3   13.60    2.50
   5   7   3   14.50    2.10
   5   7   3    7.00    1.90
   5   7   3   11.10    1.90
  -5  -8  -3    1.00    2.00
   5   8   3    0.30    2.20
   5   8   3   -0.80    1.90
   5   8   3   -0.70    1.60
   5   8   3   -1.80    1.80
   5   8   3   -2.00    1.90
  -5  -9  -3   -0.80    2.00
   5   9   3    3.40    2.60
   5   9   3    4.90    2.00
   5   9   3    1.60    2.10
   5   9   3    3.20    2.10
  -5 -10  -3   -0.30    2.30
   5  10   3   -0.40    2.70
   5  10   3    1.10    2.10
   5  10   3   -0.60    2.30
  -5 -11  -3    0.80    2.40
   5  11   3    3.30    2.90
   5  11   3   -2.90    2.20
   5  11   3    2.40    2.20
  -5 -12  -3    2.40    2.60
   5  12   3    3.30    2.70
   5  12   3    0.60    2.30
   5  12   3    1.90    3.10
  -5 -13  -3    3.70    2.80
   5  13   3    3.00    2.40
   5  13   3    3.00    2.80
   5  13   3    2.20    3.10
  -5 -14  -3   -2.80    2.90
   5  14   3   -0.10    3.50
   4 -14   3    5.10    2.70
  -4  13  -3    2.30    2.50
   4 -13   3    0.60    2.30
  -4  12  -3    2.80    2.20
   4 -12   3    6.20    2.30
  -4  11  -3   -0.10    1.90
   4 -11   3    2.50    2.10
   4 -11   3    1.30    2.10
   4 -11   3    1.90    3.20
  -4  10  -3    2.10    1.90
   4 -10   3    9.10    2.10
   4 -10   3   16.70    3.40
   4 -10   3    3.90    2.00
  -4   9  -3    2.30    1.80
   4  -9   3    1.60    2.80
   4  -9   3   -0.90    1.70
   4  -9   3   -0.70    1.70
  -4   7  -3    3.00    1.50
  -4   7  -3    5.10    1.50
   4  -7   3    7.60    1.70
   4  -7   3   12.20    2.50
   4  -7   3   12.70    2.00
   4  -7   3    5.10    1.60
  -4   6  -3    3.90    1.30
  -4   5  -3   13.80    1.40
  -4   5  -3   16.50    1.50
  -4   5  -3   15.30    2.10
   4  -5   3   17.00    2.00
   4  -5   3   12.60    1.50
   4  -5   3   13.10    1.50
   4  -5   3   16.60    2.50
  -4   4  -3   35.90    2.10
   4  -4   3   35.00    2.20
   4  -4   3   35.30    2.20
  -4   3  -3   16.10    1.30
  -4   3  -3   15.70    1.30
  -4   3  -3   13.40    1.80
   4  -3   3   21.60    2.20
   4  -3   3   14.10    1.30
   4  -3   3   13.90    1.30
  -4   2  -3   16.80    1.00
  -4   2  -3   10.10    1.00
   4  -2   3    9.60    1.00
   4  -2   3   14.70    1.10
   4  -1   3   10.00    0.80
   4  -1   3   12.30    1.50
   4  -1   3   14.60    0.90
  -4   0  -3    0.30    0.40
  -4   0  -3    0.90    0.40
   4   0   3   -1.40    1.00
   4   0   3    0.20    0.50
   4   0   3   -1.00    0.50
  -4  -1  -3   11.80    1.00
  -4  -1  -3   12.00    1.10
   4   1   3   13.80    1.60
   4   1   3   11.80    1.10
   4   1   3   11.30    1.00
  -4  -2  -3    9.60    1.00
  -4  -2  -3    8.90    1.20
   4   2   3   16.10    1.40
   4   2   3    6.80    1.10
  -4  -3  -3   12.30    1.40
   4   3   3   18.90    1.90
   4   3   3   19.70    1.60
   4   3   3   10.80    1.30
  -4  -4  -3   35.60    2.50
  -4  -4  -3   40.60    2.70
   4   4   3   34.00    2.60
   4   4   3   47.70    3.20
   4   4   3   40.90    2.70
  -4  -5  -3   16.30    2.00
  -4  -5  -3   15.50    1.90
  -4  -5  -3   13.20    1.70
   4   5   3   12.20    1.70
   4   5   3   10.30    1.70
   4   5   3   15.00    2.00
   4   6   3   11.60    1.90
  -4  -7  -3    7.60    1.90
   4   7   3   10.30    2.20
   4   7   3    7.60    1.80
   4   7   3   12.00    2.10
   4   7   3    7.90    1.90
   4   7   3    3.60    1.90
  -4  -9  -3    3.00    2.20
   4   9   3    1.60    1.90
   4   9   3    3.30    2.60
   4   9   3    0.50    1.90
   4   9   3   -0.20    1.80
  -4 -10  -3    9.90    2.40
   4  10   3   17.50    2.50
   4  10   3   14.40    3.10
   4  10   3    2.30    2.30
  -4 -11  -3    1.90    2.50
   4  11   3    3.60    2.20
   4  11   3    2.70    2.80
   4  11   3    2.30    2.40
  -4 -12  -3    3.50    2.70
   4  12   3   12.60    2.40
   4  12   3    9.60    3.10
   4  12   3    1.50    2.40
  -4 -13  -3    5.40    2.80
   4  13   3   -0.50    3.10
   4  13   3   -0.70    2.50
  -4 -14  -3    3.90    2.90
   4  14   3    7.50    3.70
   4  14   3    6.40    3.00
  -3  14  -3    4.40    2.80
   3 -14   3    4.50    2.70
  -3  13  -3   -2.90    2.40
   3 -13   3    2.70    2.50
  -3  12  -3    0.10    2.10
   3 -12   3    5.10    2.30
  -3  11  -3   -1.30    2.00
   3 -11   3    2.10    2.10
   3 -11   3    0.50    3.00
  -3  10  -3    1.50    1.80
   3 -10   3    0.50    1.90
   3 -10   3   -0.40    2.70
   3 -10   3    1.90    1.90
  -3   9  -3    3.80    1.80
   3  -9   3    4.30    2.80
   3  -9   3    0.70    1.70
   3  -9   3    1.60    1.80
  -3   8  -3    5.10    1.70
   3  -8   3    6.40    1.70
   3  -8   3    6.30    1.70
   3  -8   3   10.90    2.80
   3  -8   3    5.50    2.00
  -3   7  -3   12.60    2.20
  -3   7  -3   13.80    1.90
  -3   7  -3   14.80    1.90
   3  -7   3   12.10    1.90
   3  -7   3   12.40    2.10
   3  -7   3   11.00    2.70
   3  -7   3   16.00    2.00
  -3   6  -3    2.20    1.20
  -3   6  -3    0.40    1.20
   3  -6   3    2.30    1.30
   3  -6   3    3.30    1.90
   3  -6   3    1.50    1.20
   3  -6   3    2.80    1.40
  -3   5  -3    4.70    1.20
  -3   5  -3    3.70    1.50
  -3   5  -3    4.30    1.10
   3  -5   3    5.40    1.90
   3  -5   3    3.80    1.20
   3  -5   3    2.30    1.40
   3  -5   3    2.10    1.20
  -3   4  -3    0.90    0.50
  -3   4  -3    3.60    0.90
  -3   4  -3    3.80    1.20
   3  -4   3    6.20    1.00
   3  -4   3    3.60    1.00
   3  -4   3    4.90    1.60
  -3   3  -3   -0.90    0.50
  -3   3  -3   -0.20    0.70
  -3   3  -3   -0.60    0.70
   3  -3   3   -0.10    1.30
   3  -3   3   -0.60    0.70
   3  -3   3   -0.80    0.70
  -3   2  -3    8.90    1.30
  -3   2  -3    7.20    0.70
   3  -2   3    7.70    0.80
   3  -2   3    7.90    0.80
   3  -2   3    8.60    1.40
   3  -1   3    0.60    1.00
  -3   0  -3    0.20    0.30
  -3   0  -3    0.20    0.30
   3   0   3   -0.30    0.90
   3   0   3   -0.20    0.40
   3   0   3   -0.20    0.40
  -3  -1  -3    1.00    0.90
  -3  -1  -3    0.40    0.60
  -3  -1  -3   -0.10    0.60
   3   1   3    0.10    0.60
   3   1   3    0.30    0.60
   3   1   3    0.50    0.90
  -3  -2  -3    8.50    1.00
  -3  -2  -3    7.70    1.00
  -3  -2  -3    9.30    1.20
   3   2   3    6.70    1.00
   3   2   3    7.60    1.00
   3   2   3    9.40    1.40
  -3  -3  -3   -0.40    0.30
  -3  -3  -3   -0.40    0.90
  -3  -3  -3   -0.40    0.40
   3   3   3    0.80    0.90
   3   3   3   -1.10    1.00
   3   3   3   -1.10    0.90
  -3  -4  -3    3.60    1.10
  -3  -4  -3    3.90    1.20
   3   4   3    2.40    1.30
   3   4   3    4.40    1.30
   3   4   3    5.90    1.20
  -3  -5  -3    2.20    1.00
  -3  -5  -3    1.50    1.30
  -3  -5  -3    4.40    1.50
   3   5   3    2.60    1.50
   3   5   3    3.80    1.30
   3   5   3    5.40    1.60
   3   5   3    3.60    1.60
  -3  -6  -3    1.70    1.00
  -3  -6  -3    3.50    1.60
  -3  -6  -3    0.90    1.40
   3   6   3    4.20    1.50
   3   6   3    2.00    1.40
   3   6   3    1.60    1.50
   3   6   3    2.80    1.50
   3   6   3    2.50    1.80
  -3  -7  -3   11.30    2.10
  -3  -7  -3   11.50    2.00
  -3  -7  -3   13.30    2.20
   3   7   3   10.80    2.00
   3   7   3   12.10    2.00
   3   7   3   14.00    2.50
   3   7   3   12.40    2.20
   3   7   3   11.00    1.90
  -3  -8  -3    8.20    2.20
   3   8   3    8.70    2.00
   3   8   3    4.80    2.00
   3   8   3    8.60    2.00
   3   8   3    5.70    2.20
   3   8   3    9.80    2.00
  -3  -9  -3   -0.40    2.00
   3   9   3    3.20    2.40
   3   9   3    1.60    1.90
   3   9   3   -1.90    2.10
   3   9   3   -1.10    1.90
  -3 -10  -3    0.40    2.20
   3  10   3    0.30    1.90
   3  10   3   -0.50    1.80
   3  10   3    1.80    2.50
  -3 -11  -3    2.20    2.50
   3  11   3    2.30    1.90
   3  11   3    2.40    2.70
   3  11   3   -1.10    2.30
  -3 -12  -3    6.10    2.60
   3  12   3   -0.30    2.80
   3  12   3    1.10    2.50
   3  12   3    2.40    1.90
  -3 -13  -3    1.60    2.80
   3  13   3   -1.30    2.90
   3  13   3    1.70    2.60
  -3 -14  -3   11.50    3.40
   3  14   3    8.90    3.00
   3  14   3    0.90    3.30
  -2  14  -3   -0.70    2.50
   2 -14   3   -2.30    2.50
  -2  13  -3    5.00    2.50
   2 -13   3   15.50    2.80
  -2  12  -3    3.60    2.30
   2 -12   3    3.30    2.40
  -2  11  -3    7.00    2.30
   2 -11   3    8.20    3.40
   2 -11   3    2.40    2.20
  -2  10  -3    7.00    2.20
   2 -10   3    5.10    2.20
   2 -10   3    3.80    2.90
   2 -10   3    6.20    2.20
  -2   9  -3    7.50    2.10
   2  -9   3   10.60    2.10
   2  -9   3   10.00    2.00
   2  -9   3   21.80    3.20
  -2   8  -3   -0.60    1.70
   2  -8   3    4.30    1.70
   2  -8   3    3.50    1.80
   2  -8   3    0.70    1.60
   2  -8   3    2.40    2.40
   2  -7   3   60.39    4.30
   2  -7   3   72.89    5.20
  -2   6  -3   -0.10    1.30
  -2   6  -3    8.00    1.80
   2  -6   3    6.70    1.50
   2  -6   3    1.10    1.30
   2  -6   3    5.50    1.50
   2  -6   3    7.70    2.00
  -2   5  -3   41.50    2.90
   2  -5   3   29.60    2.40
  -2   4  -3    3.30    1.00
   2  -4   3    3.40    1.00
   2  -4   3    6.30    1.60
   2  -4   3    6.10    1.10
   2  -4   3    5.90    1.20
  -2   3  -3   21.20    1.50
  -2   3  -3   15.50    1.30
   2  -3   3   19.40    1.40
   2  -3   3   17.20    1.40
   2  -3   3   16.50    1.50
   2  -3   3   24.00    2.10
  -2   2  -3  190.88    8.10
  -2   2  -3  187.18    8.10
  -2   2  -3  203.78    9.80
   2  -2   3  182.78    8.20
   2  -2   3  198.08    9.80
   2  -2   3  180.38    8.20
   2  -1   3   11.90    0.80
   2  -1   3   13.30    1.50
   2  -1   3   12.80    0.80
  -2   0  -3   -0.80    0.30
   2   0   3   -0.70    0.40
   2   0   3   -1.30    0.30
   2   0   3   -1.80    0.80
  -2  -1  -3   11.40    1.10
  -2  -1  -3   12.10    1.10
  -2  -1  -3   12.20    1.30
   2   1   3   12.20    1.10
   2   1   3   14.00    1.10
   2   1   3   12.50    1.30
  -2  -2  -3  193.18    8.70
  -2  -2  -3  189.08    8.20
  -2  -2  -3  185.18    8.20
   2   2   3  187.58    8.20
   2   2   3  184.38    8.70
   2   2   3  186.98    8.20
  -2  -3  -3   20.80    1.70
  -2  -3  -3   16.40    1.40
   2   3   3   16.90    1.50
   2   3   3   13.20    1.60
   2   3   3   23.10    2.20
   2   3   3   18.40    1.70
  -2  -4  -3    4.80    1.20
   2   4   3    3.90    1.10
   2   4   3    5.50    1.20
   2   4   3    5.60    1.40
   2   4   3    5.80    1.40
  -2  -5  -3   47.40    3.40
   2   5   3   45.80    3.40
  -2  -6  -3    5.50    1.50
  -2  -6  -3    9.70    1.80
  -2  -6  -3    7.90    1.70
   2   6   3    6.00    1.60
   2   6   3    4.20    1.60
   2   6   3    5.10    1.50
   2   6   3    6.10    1.70
   2   6   3    5.00    1.60
  -2  -7  -3   49.20    4.00
   2   7   3   62.29    4.30
   2   7   3   48.70    4.00
   2   7   3   62.39    3.90
  -2  -8  -3    0.60    1.70
   2   8   3   -0.30    1.80
   2   8   3    1.60    1.60
   2   8   3    4.80    2.20
   2   8   3   -0.10    1.70
   2   8   3    0.20    1.90
  -2  -9  -3   11.80    2.40
   2   9   3   18.00    2.70
   2   9   3    4.30    2.00
  -2 -10  -3    9.60    2.60
   2  10   3    7.30    2.70
   2  10   3    8.00    2.10
   2  10   3    7.30    2.50
  -2 -11  -3    4.50    2.50
   2  11   3    1.50    2.60
   2  11   3    5.90    1.90
   2  11   3    7.90    2.50
  -2 -12  -3    5.00    2.60
   2  12   3    6.10    3.00
   2  12   3    3.80    1.90
   2  12   3    2.20    2.50
  -2 -13  -3   14.50    3.10
   2  13   3    8.90    2.90
   2  13   3   12.10    3.20
  -2 -14  -3    4.60    2.80
   2  14   3    1.10    2.80
   2  14   3   -1.50    3.10
  -1  14  -3   -5.40    2.30
   1 -14   3    2.20    2.70
  -1  13  -3    1.80    2.40
   1 -13   3    4.30    2.70
  -1  12  -3    1.70    2.60
  -1  12  -3   -1.80    2.00
   1 -12   3   -1.70    2.30
  -1  11  -3    2.70    2.40
  -1  11  -3   -0.40    2.20
   1 -11   3    2.10    2.20
  -1  10  -3    2.10    2.30
  -1  10  -3    1.40    2.20
   1 -10   3    1.80    2.10
   1 -10   3    3.50    2.90
   1 -10   3    0.60    1.90
  -1   9  -3   -2.50    1.90
  -1   9  -3    0.20    1.90
   1  -9   3    4.90    2.60
   1  -9   3    1.70    1.80
   1  -9   3    0.90    1.80
  -1   8  -3    0.70    1.80
  -1   8  -3    1.40    1.70
   1  -8   3    1.00    1.70
   1  -8   3    3.40    2.20
   1  -8   3    3.10    1.80
   1  -8   3    3.30    1.60
  -1   7  -3    7.40    1.60
  -1   7  -3   10.00    2.00
  -1   7  -3    8.60    1.80
  -1   7  -3    2.50    1.70
   1  -7   3    4.40    1.70
   1  -7   3    8.30    2.20
   1  -7   3    5.60    1.60
   1  -7   3    5.00    1.60
  -1   6  -3    0.90    1.20
  -1   6  -3    0.20    1.50
  -1   6  -3    1.60    1.60
  -1   6  -3    1.30    1.40
   1  -6   3   -0.10    1.80
   1  -6   3   -1.90    1.30
   1  -6   3    0.30    1.30
   1  -6   3    1.70    1.30
  -1   5  -3   38.20    3.10
  -1   5  -3   40.80    2.60
  -1   5  -3   38.90    2.80
  -1   5  -3   38.70    2.50
   1  -5   3   44.10    2.60
   1  -5   3   39.30    3.40
   1  -5   3   37.20    2.80
   1  -5   3   40.10    2.60
  -1   4  -3    1.70    1.20
  -1   4  -3   -0.70    0.40
  -1   4  -3   -0.90    0.90
   1  -4   3   -0.30    1.00
   1  -4   3   -0.60    0.90
   1  -4   3   -0.10    1.00
   1  -4   3    1.30    1.30
  -1   3  -3   27.70    1.80
  -1   3  -3   28.20    1.80
   1  -3   3   29.40    1.80
   1  -3   3   26.20    2.40
   1  -3   3   30.70    1.90
   1  -3   3   27.00    2.00
  -1   2  -3    8.90    0.90
  -1   2  -3    9.30    0.90
  -1   2  -3    8.70    0.90
   1  -2   3    8.30    0.90
   1  -2   3   10.70    0.90
   1  -2   3   11.50    1.00
   1  -2   3    8.80    1.30
  -1   1  -3    7.50    0.90
  -1   1  -3    7.80    0.60
  -1   1  -3    6.10    0.70
   1  -1   3    6.70    0.80
   1  -1   3    7.80    0.70
   1  -1   3    6.00    0.60
  -1   0  -3   -0.20    0.30
  -1   0  -3    0.30    0.40
  -1   0  -3   -0.20    0.30
  -1   0  -3    0.30    0.60
   1   0   3   -1.00    0.40
   1   0   3   -0.40    0.30
   1   0   3   -0.30    0.30
   1   0   3    0.10    0.60
  -1  -1  -3    7.40    0.70
  -1  -1  -3    9.10    0.90
  -1  -1  -3    8.20    0.80
   1   1   3    8.00    0.80
   1   1   3    8.30    0.90
   1   1   3    7.80    1.10
   1   1   3    8.00    0.80
  -1  -2  -3    9.50    1.30
  -1  -2  -3   10.90    1.10
  -1  -2  -3    8.10    1.10
   1   2   3    9.50    1.10
   1   2   3    8.80    1.40
   1   2   3    7.60    1.20
   1   2   3   10.50    1.10
  -1  -3  -3   28.90    2.00
   1   3   3   26.70    1.80
   1   3   3   28.30    2.30
   1   3   3   29.30    2.30
   1   3   3   29.50    2.00
  -1  -4  -3   -0.60    0.90
  -1  -4  -3    1.00    1.10
   1   4   3    0.60    1.10
   1   4   3    1.40    1.20
   1   4   3    1.00    1.10
   1   4   3    1.10    1.30
  -1  -5  -3   42.50    2.80
  -1  -5  -3   38.70    2.90
  -1  -5  -3   42.50    2.70
   1   5   3   37.50    2.80
   1   5   3   42.10    2.60
   1   5   3   36.40    3.20
   1   5   3   43.80    2.60
  -1  -6  -3    1.30    1.40
  -1  -6  -3   -0.50    1.50
  -1  -6  -3   -0.30    1.40
   1   6   3    4.40    1.80
   1   6   3    3.20    1.40
   1   6   3   -0.20    1.30
   1   6   3    3.90    1.60
   1   6   3    2.80    1.50
  -1  -7  -3    6.60    1.70
  -1  -7  -3    4.10    1.70
  -1  -7  -3   10.80    1.90
   1   7   3    5.60    1.90
   1   7   3    4.70    1.70
   1   7   3    8.40    1.60
   1   7   3    9.30    1.90
   1   7   3    4.50    1.50
  -1  -8  -3    1.90    1.60
  -1  -8  -3    2.20    1.70
   1   8   3    4.30    1.80
   1   8   3    2.30    2.10
   1   8   3    3.50    1.60
   1   8   3    3.20    1.80
   1   8   3    2.60    1.80
  -1  -9  -3   -0.50    2.00
   1   9   3   -2.60    2.10
   1   9   3    0.10    1.50
   1   9   3    2.10    2.10
  -1 -10  -3    2.60    2.10
   1  10   3    1.20    2.20
   1  10   3    0.80    2.50
   1  10   3    0.30    1.60
  -1 -11  -3    0.30    2.40
   1  11   3    3.30    2.70
   1  11   3    3.60    2.40
   1  11   3    0.70    1.70
  -1 -12  -3    0.00    2.40
   1  12   3    0.20    2.40
   1  12   3    0.30    1.70
   1  12   3    2.60    2.80
  -1 -13  -3    9.20    2.90
   1  13   3    5.50    2.80
   1  13   3   -0.20    3.00
  -1 -14  -3    0.30    2.60
   1  14   3   -6.80    2.50
   1  14   3    1.60    3.30
   0  14  -3    4.60    2.90
   0  14  -3    6.30    2.70
   0 -14   3    6.10    2.70
   0  13  -3    0.40    2.50
   0  13  -3   -1.10    2.60
   0 -13   3    1.60    2.60
   0  12  -3   13.90    2.90
   0  12  -3    9.40    2.70
   0 -12   3   11.40    2.70
   0  11  -3   10.00    2.70
   0  11  -3   14.80    2.90
   0 -11   3   12.90    2.60
   0  10  -3   18.20    2.80
   0  10  -3    9.80    2.30
   0 -10   3   24.40    3.50
   0 -10   3   12.20    2.30
   0   9  -3   34.50    3.30
   0   9  -3   46.10    4.10
   0  -9   3   46.80    4.60
   0  -9   3   38.70    3.40
   0  -9   3   40.70    3.80
   0  -9   3   31.80    3.20
   0   8  -3   58.89    4.20
   0   8  -3   59.29    4.30
   0  -8   3   45.20    3.90
   0  -8   3   47.20    3.60
   0  -8   3   60.69    4.60
   0   7  -3    1.50    1.60
   0   7  -3    7.10    1.80
   0   7  -3   11.20    1.90
   0   7  -3    1.70    0.80
   0  -7   3    2.60    1.50
   0  -7   3   11.10    2.30
   0  -7   3    4.80    1.60
   0  -7   3    6.70    1.70
   0   6  -3   46.00    3.40
   0  -6   3   50.19    3.40
   0   5  -3    3.20    1.30
   0   5  -3    2.80    1.30
   0   5  -3    2.50    1.20
   0  -5   3    2.60    1.20
   0  -5   3    5.20    1.70
   0  -5   3    1.90    1.20
   0  -5   3    3.00    1.30
   0   4  -3   35.20    2.50
   0   4  -3   26.60    2.20
   0  -4   3   40.70    2.40
   0  -4   3   44.20    2.40
   0  -4   3   37.50    2.60
   0   3  -3    3.00    1.10
   0   3  -3    1.60    0.80
   0   3  -3    1.60    1.00
   0   3  -3    1.50    0.90
   0  -3   3    4.40    1.30
   0  -3   3    1.70    0.90
   0  -3   3    2.90    1.00
   0  -3   3    3.00    1.00
   0   2  -3   73.39    2.90
   0   2  -3   53.89    3.00
   0   2  -3   52.19    2.90
   0   2  -3   49.80    3.00
   0  -2   3   61.69    2.90
   0  -2   3   58.99    3.00
   0  -2   3   70.99    3.00
   0   1  -3   -1.60    0.50
   0   1  -3   -0.80    0.40
   0   1  -3   -1.10    0.40
   0  -1   3   -0.50    0.50
   0  -1   3   -1.60    0.40
   0  -1   3   -0.70    0.40
   0   0  -3   -0.20    0.30
   0   0  -3   -0.20    0.20
   0   0  -3   -0.20    0.40
   0   0  -3   -0.30    0.30
   0   0   3   -0.40    0.30
   0   0   3   -0.30    0.30
   0   0   3   -0.40    0.40
   0   0   3   -0.10    0.30
   0  -1  -3   -2.60    0.30
   0  -1  -3   -1.20    0.50
   0  -1  -3   -0.90    0.50
   0   1   3    0.20    0.50
   0   1   3   -0.70    0.60
   0   1   3   -0.90    0.50
   0   1   3   -1.40    0.40
   0  -2  -3   53.09    2.90
   0  -2  -3   59.19    3.30
   0  -2  -3   64.09    3.20
   0   2   3   61.69    3.00
   0   2   3   49.20    2.80
   0   2   3   66.09    3.30
   0   2   3   61.09    3.30
   0  -3  -3    4.10    1.10
   0  -3  -3    2.90    1.00
   0  -3  -3    4.10    1.10
   0  -3  -3    2.60    1.00
   0   3   3    1.70    1.00
   0   3   3    2.60    1.00
   0   3   3    3.40    1.20
   0   3   3    2.70    1.00
   0  -4  -3   45.30    2.60
   0  -4  -3   29.60    2.50
   0  -4  -3   42.60    2.70
   0   4   3   43.50    2.60
   0   4   3   43.10    3.00
   0   4   3   35.60    2.40
   0  -5  -3    6.40    1.40
   0  -5  -3    4.10    1.30
   0  -5  -3    3.90    1.40
   0   5   3    2.20    1.30
   0   5   3    2.40    1.40
   0   5   3    5.00    1.60
   0   5   3    6.20    1.30
   0   5   3    4.80    1.20
   0   6   3   56.79    3.80
   0   6   3   61.59    4.30
   0   6   3   78.39    4.60
   0  -7  -3    6.40    1.70
   0  -7  -3    9.50    2.10
   0  -7  -3    8.30    1.90
   0   7   3    5.40    1.60
   0   7   3    6.40    2.00
   0   7   3    4.60    1.60
   0   7   3    4.40    1.40
   0   7   3    7.20    2.00
   0  -8  -3   44.70    3.60
   0  -8  -3   33.30    3.40
   0   8   3   51.39    3.50
   0   8   3   49.10    3.30
   0   8   3   50.89    4.10
   0   8   3   58.69    4.30
   0  -9  -3   40.20    3.70
   0   9   3   42.60    3.20
   0   9   3   33.20    3.50
   0   9   3   48.60    4.30
   0 -10  -3   15.10    2.70
   0  10   3    5.40    2.20
   0  10   3   19.80    3.10
   0  10   3   15.80    2.00
   0 -11  -3   10.50    2.70
   0  11   3   17.00    3.30
   0  11   3   15.40    2.00
   0  11   3   14.30    2.90
   0 -12  -3   12.00    2.80
   0  12   3   16.20    3.10
   0  12   3   13.10    1.90
   0  12   3    6.50    2.70
   0 -13  -3    6.70    2.80
   0  13   3   -1.80    2.50
   0  13   3    2.00    3.00
   0 -14  -3    9.20    3.00
   0  14   3   10.70    3.40
   0  14   3    2.10    2.70
   1  14  -3    4.00    2.60
   1  14  -3    5.20    3.00
  -1 -14   3    1.20    2.70
   1  13  -3   -2.20    2.50
   1  13  -3   -0.80    2.60
  -1 -13   3   -1.50    2.40
   1  12  -3   -0.70    2.40
   1  12  -3   -3.40    2.40
  -1 -12   3   -1.20    2.30
   1  11  -3    3.10    2.40
   1  11  -3    2.80    2.60
  -1 -11   3    4.40    2.30
   1  10  -3    1.40    2.30
   1  10  -3   -2.30    2.20
   1  10  -3    5.60    1.00
  -1 -10   3    4.90    2.30
   1   9  -3    8.60    2.20
   1   9  -3    8.10    2.30
   1   9  -3    5.50    1.10
  -1  -9   3    4.90    2.00
  -1  -9   3    6.20    2.50
  -1  -9   3    6.90    2.10
  -1  -9   3    3.20    2.00
   1   8  -3    9.00    2.10
   1   8  -3    3.50    1.90
   1   8  -3    7.60    1.10
   1   8  -3    6.90    1.90
  -1  -8   3    6.60    1.80
  -1  -8   3    5.90    2.20
  -1  -8   3    6.60    1.90
  -1  -8   3    7.00    2.00
   1   7  -3    5.80    1.60
   1   7  -3    5.30    1.80
   1   7  -3    8.90    1.80
   1   7  -3   11.80    2.00
  -1  -7   3    8.40    1.70
  -1  -7   3    9.20    2.20
  -1  -7   3   11.90    1.90
  -1  -7   3    8.40    1.80
   1   6  -3    0.50    1.30
   1   6  -3    0.70    1.40
   1   6  -3    1.00    1.30
   1   6  -3   -1.30    1.50
  -1  -6   3    1.40    1.70
  -1  -6   3    2.80    1.40
  -1  -6   3    1.20    1.30
  -1  -6   3   -1.40    1.40
   1   5  -3    1.30    1.30
   1   5  -3    1.90    1.20
   1   5  -3    1.90    1.20
   1   5  -3    0.30    1.10
  -1  -5   3    2.20    1.20
  -1  -5   3    1.70    1.40
  -1  -5   3    1.10    1.20
  -1  -5   3    0.60    1.30
   1   4  -3    2.80    1.10
   1   4  -3    2.20    1.10
   1   4  -3    1.20    0.80
   1   4  -3    3.50    1.10
  -1  -4   3    3.10    1.30
  -1  -4   3    3.80    1.20
  -1  -4   3    4.10    1.10
  -1  -4   3    2.00    1.00
   1   3  -3    2.30    0.90
   1   3  -3    1.20    0.90
   1   3  -3    0.70    0.60
   1   3  -3    0.90    0.90
  -1  -3   3    1.70    0.90
  -1  -3   3    1.70    1.00
  -1  -3   3    0.90    0.90
  -1  -3   3    2.30    1.00
   1   2  -3    4.60    0.80
   1   2  -3    4.30    0.90
   1   2  -3    3.60    0.80
  -1  -2   3    3.30    1.00
  -1  -2   3    4.30    0.70
  -1  -2   3    4.70    0.90
  -1  -2   3    4.70    0.90
   1   1  -3    4.50    0.50
   1   1  -3    4.40    0.40
  -1  -1   3    4.20    0.60
  -1  -1   3    3.80    0.40
  -1  -1   3    4.50    0.60
   1   0  -3   -0.30    0.40
  -1   0   3   -0.50    0.40
  -1   0   3   -1.30    0.40
   1  -1  -3    4.00    0.60
   1  -1  -3    4.10    0.60
   1  -1  -3    4.00    0.60
   1  -1  -3    3.40    0.60
  -1   1   3    4.30    0.60
  -1   1   3    3.40    0.60
  -1   1   3    4.50    0.70
   1  -2  -3    3.50    1.00
   1  -2  -3    4.40    0.90
   1  -2  -3    3.70    0.90
   1  -2  -3    4.50    1.00
  -1   2   3    3.60    1.00
  -1   2   3    4.80    1.10
  -1   2   3    5.00    1.00
   1  -3  -3    2.30    0.90
   1  -3  -3    1.30    1.00
   1  -3  -3    1.20    1.00
   1  -3  -3    1.10    1.00
  -1   3   3    1.20    1.00
  -1   3   3    2.50    1.00
  -1   3   3    2.50    1.00
  -1   3   3    0.90    1.20
   1  -4  -3    2.50    1.00
   1  -4  -3    3.90    1.00
   1  -4  -3    2.90    1.20
  -1   4   3    3.20    1.20
  -1   4   3    1.60    1.00
  -1   4   3    3.90    1.10
  -1   4   3    5.40    1.10
  -1   4   3    3.90    1.50
   1  -5  -3    2.40    1.00
   1  -5  -3    2.50    1.40
   1  -5  -3    1.00    1.30
   1  -5  -3    1.10    1.20
  -1   5   3    2.90    1.40
  -1   5   3    3.30    1.20
  -1   5   3    2.00    1.00
  -1   5   3    3.30    1.20
  -1   5   3    1.90    1.30
   1  -6  -3    1.60    1.50
   1  -6  -3    1.30    1.00
   1  -6  -3    0.00    1.20
   1  -6  -3   -0.80    1.60
  -1   6   3    1.40    1.30
  -1   6   3    2.40    1.30
  -1   6   3    1.50    1.50
  -1   6   3   -1.90    1.60
  -1   6   3    1.20    1.10
   1  -7  -3    8.90    1.80
   1  -7  -3   11.90    2.10
   1  -7  -3    8.90    1.90
  -1   7   3    9.00    2.00
  -1   7   3    9.60    1.80
  -1   7   3   11.80    1.70
  -1   7   3    5.10    1.90
  -1   7   3    8.10    1.50
   1  -8  -3    7.30    2.00
   1  -8  -3    7.10    1.90
  -1   8   3    9.00    2.00
  -1   8   3    6.30    2.10
  -1   8   3    5.20    1.30
  -1   8   3    6.10    2.30
   1  -9  -3    6.40    2.20
  -1   9   3    4.60    2.10
  -1   9   3    2.80    2.50
  -1   9   3    3.30    1.40
   1 -10  -3    3.80    2.00
  -1  10   3    3.90    2.60
  -1  10   3    3.90    2.20
   1 -11  -3    3.70    2.30
  -1  11   3    8.00    2.40
  -1  11   3    2.30    2.70
   1 -12  -3    1.40    2.40
  -1  12   3   -0.50    2.30
  -1  12   3   -0.10    2.70
   1 -13  -3   -2.50    2.40
  -1  13   3   -0.10    2.80
  -1  13   3    1.20    2.50
   1 -14  -3    6.00    2.90
  -1  14   3    2.10    2.70
  -1  14   3    5.00    3.20
   2  14  -3    2.80    3.00
   2  14  -3    2.50    2.80
  -2 -14   3    5.30    3.00
   2  13  -3    4.30    2.60
   2  13  -3   11.60    3.10
  -2 -13   3    4.60    2.60
   2  12  -3    7.60    2.80
   2  12  -3    4.90    2.60
  -2 -12   3   11.20    2.80
   2  11  -3   23.30    3.10
   2  11  -3    8.80    2.60
  -2 -11   3   21.60    3.00
   2  10  -3   13.00    2.80
   2  10  -3   11.00    2.50
   2  10  -3   12.00    1.70
  -2 -10   3    8.20    2.40
   2   9  -3   82.99    5.30
   2   9  -3   80.39    5.50
   2   9  -3   72.09    4.30
  -2  -9   3   71.49    4.80
   2   8  -3   26.60    2.80
   2   8  -3   20.20    2.50
   2   8  -3   23.10    2.70
  -2  -8   3   24.20    2.70
  -2  -8   3   24.90    3.10
  -2  -8   3   18.60    2.40
  -2  -8   3   35.20    3.10
   2   7  -3   48.20    3.70
   2   7  -3   51.39    3.60
   2   7  -3   49.90    3.30
  -2  -7   3   41.80    3.20
  -2  -7   3   41.90    3.40
  -2  -7   3   56.59    4.10
   2   6  -3   29.50    2.90
   2   6  -3   27.70    2.60
   2   6  -3   26.90    2.30
   2   6  -3   28.20    2.70
  -2  -6   3   28.90    2.70
  -2  -6   3   30.20    2.90
  -2  -6   3   30.90    2.60
  -2  -6   3   29.00    2.60
   2   5  -3   33.50    2.50
   2   5  -3   36.80    2.80
   2   5  -3   35.10    2.40
  -2  -5   3   35.70    2.60
  -2  -5   3   35.80    2.60
   2   4  -3   45.00    2.60
   2   4  -3   46.50    2.90
   2   4  -3   47.30    3.00
   2   4  -3   43.10    2.70
  -2  -4   3   47.60    2.90
  -2  -4   3   52.39    3.30
  -2  -4   3   46.50    2.70
  -2  -4   3   43.50    2.70
   2   3  -3  216.98   11.00
   2   3  -3  225.28    9.60
   2   3  -3  220.88    9.60
   2   3  -3  206.98    9.90
  -2  -3   3  219.98   11.10
  -2  -3   3  218.98    9.50
  -2  -3   3  210.18    9.90
  -2  -3   3  228.78    9.60
   2   2  -3   47.50    2.40
   2   2  -3   40.30    2.50
  -2  -2   3   40.00    2.40
  -2  -2   3   47.90    2.50
   2   1  -3   15.10    1.30
  -2  -1   3   15.20    1.30
   2   0  -3   -0.20    0.60
   2   0  -3   -0.20    0.50
  -2   0   3   -0.10    0.30
  -2   0   3    0.10    0.60
   2  -1  -3    3.00    0.80
  -2   1   3    8.20    1.00
   2  -2  -3   34.80    2.30
   2  -2  -3   42.90    2.40
   2  -2  -3   37.10    2.60
  -2   2   3   34.80    2.20
   2  -3  -3  207.58   10.00
   2  -3  -3  209.88    9.40
   2  -3  -3  221.48    9.40
  -2   3   3  206.48    9.90
  -2   3   3  218.18    9.40
  -2   3   3  223.58   11.10
   2  -4  -3   44.20    2.70
   2  -4  -3   52.59    2.80
   2  -4  -3   48.70    2.80
  -2   4   3   46.10    3.10
  -2   4   3   45.30    2.70
  -2   4   3   44.20    2.60
   2  -5  -3   36.40    2.30
   2  -5  -3   26.70    2.30
   2  -5  -3   29.10    2.40
   2  -5  -3   36.50    2.90
  -2   5   3   42.40    2.40
  -2   5   3   35.20    3.00
  -2   5   3   28.20    2.60
   2  -6  -3   22.40    2.40
   2  -6  -3   29.60    2.60
   2  -6  -3   30.90    2.20
   2  -6  -3   30.80    2.50
  -2   6   3   28.60    3.00
  -2   6   3   33.90    3.20
  -2   6   3   29.90    2.50
  -2   6   3   29.10    2.60
   2  -7  -3   46.40    3.80
   2  -7  -3   51.19    2.90
   2  -7  -3   40.40    3.20
  -2   7   3   39.20    3.80
  -2   7   3   48.90    3.80
  -2   7   3   35.80    3.00
   2  -8  -3   19.60    2.30
   2  -8  -3   23.00    2.50
  -2   8   3   24.70    2.90
  -2   8   3   18.50    2.40
   2  -9  -3   37.80    3.30
  -2   9   3   21.80    2.80
   2 -10  -3   12.70    2.60
  -2  10   3   11.50    2.50
  -2  10   3   15.20    3.00
   2 -11  -3   18.80    2.80
  -2  11   3    7.70    2.50
   2 -12  -3    4.10    2.50
  -2  12   3    6.80    3.00
  -2  12   3    7.40    2.60
   2 -13  -3    3.00    2.60
  -2  13   3    5.50    2.80
  -2  13   3    8.20    3.10
   2 -14  -3   13.50    3.20
  -2  14   3    6.90    2.90
  -2  14   3    8.60    3.40
   3  14  -3   -0.40    2.80
   3  14  -3   -2.90    2.80
  -3 -14   3   -1.10    2.60
   3  13  -3   -0.80    2.40
   3  13  -3   -2.40    2.60
  -3 -13   3    1.20    2.50
   3  12  -3    4.90    2.80
   3  12  -3    4.20    2.60
  -3 -12   3    8.30    2.60
   3  11  -3   -0.10    2.10
   3  11  -3    2.20    1.50
   3  11  -3    1.40    2.60
  -3 -11   3   -0.40    2.30
   3  10  -3    4.30    2.40
   3  10  -3    6.30    1.60
   3  10  -3    1.80    2.20
  -3 -10   3    4.40    2.10
   3   9  -3    5.80    2.20
   3   9  -3    4.50    1.80
   3   9  -3   -0.20    1.80
  -3  -9   3    1.80    1.90
   3   8  -3    5.70    1.80
   3   8  -3    6.50    2.10
   3   8  -3   10.60    2.00
  -3  -8   3    7.30    1.80
  -3  -8   3   11.20    2.20
  -3  -8   3   10.30    2.00
   3   7  -3    3.50    1.60
   3   7  -3    3.30    1.40
   3   7  -3    1.70    1.60
   3   7  -3    4.60    1.80
  -3  -7   3    4.30    1.70
  -3  -7   3    3.40    1.60
  -3  -7   3    3.20    1.60
  -3  -7   3    2.40    1.70
   3   6  -3    0.70    1.40
   3   6  -3    3.80    1.60
   3   6  -3    0.60    1.20
   3   6  -3    2.00    1.30
  -3  -6   3    1.20    1.50
  -3  -6   3    1.10    1.40
  -3  -6   3    0.30    1.50
  -3  -6   3    2.70    1.40
   3   5  -3    6.00    1.30
   3   5  -3    4.90    1.30
   3   5  -3    6.90    1.50
   3   5  -3    7.00    1.30
  -3  -5   3    6.70    1.50
  -3  -5   3    6.30    1.30
  -3  -5   3    7.20    1.60
  -3  -5   3    5.50    1.30
   3   4  -3    1.40    1.00
   3   4  -3    0.90    0.80
   3   4  -3    1.90    1.00
   3   4  -3    0.90    1.10
  -3  -4   3    1.40    1.20
  -3  -4   3    1.50    1.00
  -3  -4   3    1.80    1.10
  -3  -4   3    0.30    1.00
   3   3  -3   19.70    1.80
   3   3  -3   18.20    1.50
   3   3  -3   20.50    1.90
   3   3  -3   21.10    1.60
  -3  -3   3   23.30    1.80
  -3  -3   3   21.70    1.80
  -3  -3   3   22.00    1.80
  -3  -3   3   21.60    1.80
   3   2  -3   25.90    1.80
   3   2  -3   24.50    1.80
   3   2  -3   22.40    1.70
  -3  -2   3   25.60    1.90
  -3  -2   3   24.70    1.60
  -3  -2   3   23.20    1.60
  -3  -2   3   26.20    1.90
   3   1  -3    8.20    1.00
   3   1  -3    9.60    1.10
  -3  -1   3    9.10    1.10
   3   0  -3    0.30    0.90
   3   0  -3   -0.20    0.80
  -3   0   3   -0.10    0.90
  -3   0   3    0.50    0.80
   3  -1  -3    6.60    1.00
   3  -1  -3   10.60    1.20
  -3   1   3    9.40    1.10
  -3   1   3    9.70    1.20
   3  -2  -3   25.90    1.90
   3  -2  -3   26.50    1.90
  -3   2   3   25.80    1.70
  -3   2   3   26.50    1.90
  -3   2   3   24.60    2.20
   3  -3  -3   20.60    1.80
   3  -3  -3   19.60    1.70
  -3   3   3   21.30    1.90
  -3   3   3   22.20    2.10
   3  -4  -3   -0.20    0.20
   3  -4  -3    2.60    0.90
   3  -4  -3    0.40    1.10
   3  -4  -3    0.60    1.00
  -3   4   3    0.00    1.10
  -3   4   3   -0.20    0.20
  -3   4   3    1.20    0.80
   3  -5  -3    8.50    1.60
   3  -5  -3    6.70    1.30
   3  -5  -3    6.30    1.40
   3  -5  -3    9.30    1.20
  -3   5   3    6.40    1.70
   3  -6  -3    1.00    1.30
   3  -6  -3    2.50    1.60
   3  -6  -3    1.40    1.00
   3  -6  -3    1.30    1.30
  -3   6   3   -0.90    1.20
  -3   6   3   -0.60    1.60
  -3   6   3   -0.10    0.60
  -3   6   3    0.20    0.30
   3  -7  -3    2.70    1.60
   3  -7  -3    1.90    1.00
   3  -7  -3    3.50    1.70
   3  -7  -3    1.40    1.40
  -3   7   3    5.30    2.00
  -3   7   3    3.10    1.10
  -3   7   3    4.40    1.60
  -3   7   3    4.40    1.70
   3  -8  -3    7.30    1.80
   3  -8  -3   10.10    1.40
   3  -8  -3    8.40    1.90
  -3   8   3    4.90    1.80
  -3   8   3    8.90    2.20
   3  -9  -3    1.10    1.90
   3  -9  -3    4.40    2.00
  -3   9   3    0.40    1.90
  -3   9   3    2.50    2.40
   3 -10  -3    1.30    2.00
  -3  10   3    3.20    2.10
  -3  10   3    5.20    2.60
   3 -11  -3   -3.00    2.00
  -3  11   3   -1.80    2.10
  -3  11   3   -1.30    2.40
   3 -12  -3    1.30    2.40
  -3  12   3    6.80    2.50
   3 -13  -3   -1.70    2.40
  -3  13   3    1.90    2.50
   3 -14  -3   -3.30    2.50
   4  14  -3    1.30    2.90
   4  14  -3    1.80    3.00
  -4 -14   3    1.90    2.80
   4  13  -3    5.10    2.80
   4  13  -3    2.10    2.80
  -4 -13   3    6.90    2.80
   4  12  -3   11.60    2.00
   4  12  -3   11.50    3.00
   4  12  -3    3.80    2.50
  -4 -12   3    6.50    2.60
   4  11  -3   -1.30    2.20
   4  11  -3    2.90    2.50
   4  11  -3    0.90    1.60
  -4 -11   3    3.60    2.50
   4  10  -3    6.60    2.60
   4  10  -3    4.30    2.10
  -4 -10   3    9.90    2.60
   4   9  -3    8.50    2.40
   4   9  -3    3.10    2.10
   4   9  -3    2.90    1.70
  -4  -9   3    1.90    2.10
   4   8  -3   11.40    2.10
  -4  -8   3   19.50    2.30
   4   7  -3    7.70    1.60
   4   7  -3    5.00    1.70
   4   7  -3    7.20    1.60
   4   7  -3    6.20    1.90
  -4  -7   3    8.60    1.70
  -4  -7   3    9.40    1.90
  -4  -7   3    6.10    1.90
   4   6  -3   13.50    1.80
   4   6  -3   11.10    1.70
   4   6  -3   15.90    2.00
   4   6  -3   22.40    2.10
  -4  -6   3   15.90    1.90
  -4  -6   3   13.80    1.70
  -4  -6   3   14.50    1.90
   4   5  -3   63.49    3.70
   4   5  -3   51.09    3.50
   4   5  -3   55.59    3.40
   4   5  -3   46.10    3.30
  -4  -5   3   45.00    3.30
  -4  -5   3   61.89    3.50
  -4  -5   3   71.39    3.60
   4   4  -3   36.20    2.50
   4   4  -3   36.70    2.30
   4   4  -3   37.20    2.70
   4   4  -3   37.50    2.40
  -4  -4   3   38.70    2.60
  -4  -4   3   37.90    2.40
  -4  -4   3   32.80    2.50
  -4  -4   3   38.40    2.50
   4   3  -3   43.70    2.50
   4   3  -3   40.30    2.60
   4   3  -3   48.60    2.80
   4   3  -3   45.20    2.60
  -4  -3   3   46.50    2.70
  -4  -3   3   43.60    2.60
  -4  -3   3   47.90    2.60
   4   2  -3  124.19    5.70
   4   2  -3  124.19    6.00
   4   2  -3  122.09    5.70
  -4  -2   3  125.89    5.70
   4   1  -3   52.19    2.80
   4   1  -3   53.89    2.80
  -4  -1   3   50.89    2.80
  -4  -1   3   54.89    2.70
   4   0  -3    0.20    0.90
   4   0  -3    1.10    0.90
  -4   0   3   -0.60    0.80
  -4   0   3    0.70    0.70
  -4   0   3    0.70    0.90
   4  -1  -3   53.69    2.80
   4  -1  -3   56.39    2.80
  -4   1   3   51.89    3.20
  -4   1   3   52.99    2.80
  -4   1   3   56.59    2.70
   4  -2  -3  117.49    5.50
   4  -2  -3  121.89    5.60
  -4   2   3  125.99    6.60
  -4   2   3  118.39    5.60
  -4   2   3  126.09    5.50
   4  -3  -3   37.50    2.40
  -4   3   3   35.20    2.80
  -4   3   3   43.80    2.50
   4  -4  -3   36.40    2.40
   4  -4  -3   36.40    2.40
  -4   4   3   31.10    3.00
  -4   4   3   42.20    2.40
  -4   4   3   37.20    2.50
   4  -5  -3   42.60    3.10
   4  -5  -3   62.29    3.70
  -4   5   3   54.69    3.90
  -4   5   3   48.60    3.20
   4  -6  -3   14.20    1.90
   4  -6  -3   17.80    2.20
   4  -6  -3    9.90    1.70
   4  -6  -3   13.30    1.50
  -4   6   3   13.90    2.20
  -4   6   3   14.10    1.90
  -4   6   3   16.50    1.70
   4  -7  -3    9.30    2.10
   4  -7  -3    7.10    1.70
   4  -7  -3    7.60    1.20
   4  -7  -3    5.60    1.70
  -4   7   3    7.80    1.50
  -4   7   3    4.10    1.90
   4  -8  -3    8.60    1.90
   4  -8  -3   14.80    2.10
   4  -9  -3    5.00    1.30
   4  -9  -3    1.20    1.90
   4  -9  -3    4.90    1.90
   4 -10  -3    9.20    2.30
   4 -11  -3    1.50    2.20
   4 -12  -3    5.60    2.50
   4 -13  -3    3.90    2.60
   4 -14  -3    3.50    2.70
   5  14  -3    5.90    3.40
   5  14  -3    7.50    3.10
  -5 -14   3    7.60    3.10
   5  13  -3    2.90    2.90
   5  13  -3    2.50    2.80
  -5 -13   3    5.10    2.70
   5  12  -3    5.00    2.00
   5  12  -3    3.30    2.90
   5  12  -3    6.20    2.80
  -5 -12   3    8.50    2.90
   5  11  -3    7.50    2.10
   5  11  -3    5.70    2.70
   5  11  -3    6.20    2.50
  -5 -11   3    6.00    2.30
   5  10  -3   -0.90    2.20
   5  10  -3    2.30    2.40
   5  10  -3    0.70    1.80
  -5 -10   3    3.10    2.10
   5   9  -3   11.80    2.60
   5   9  -3   10.00    2.10
   5   9  -3    9.60    2.40
  -5  -9   3   13.30    2.60
   5   8  -3    1.10    1.90
   5   8  -3    1.00    1.40
   5   8  -3    5.60    2.10
  -5  -8   3   -0.20    1.90
   5   7  -3   11.40    1.80
   5   7  -3   13.10    2.30
   5   7  -3   12.30    2.00
   5   7  -3    7.80    1.80
  -5  -7   3   11.20    2.10
  -5  -7   3   13.00    2.00
   5   6  -3    1.60    1.10
   5   6  -3    2.20    1.40
   5   6  -3    1.40    1.50
   5   6  -3    3.60    1.70
  -5  -6   3    3.10    1.40
  -5  -6   3    5.10    1.40
  -5  -6   3    2.10    1.70
   5   5  -3   10.00    1.60
   5   5  -3   13.80    1.80
   5   5  -3    7.10    1.60
   5   5  -3   10.30    1.30
  -5  -5   3    6.80    1.40
  -5  -5   3   10.70    1.60
  -5  -5   3   10.30    1.80
   5   4  -3    2.90    1.20
   5   4  -3    0.60    0.70
   5   4  -3    5.90    1.40
   5   4  -3    1.60    1.30
  -5  -4   3    0.40    1.20
  -5  -4   3    3.60    1.20
  -5  -4   3    0.00    0.60
   5   3  -3   43.90    2.70
   5   3  -3   38.60    2.60
   5   3  -3   50.99    3.00
  -5  -3   3   46.30    2.80
  -5  -3   3   48.40    2.90
   5   2  -3   62.99    3.20
   5   2  -3   57.89    3.40
   5   2  -3   60.89    3.20
  -5  -2   3   59.99    3.20
   5   1  -3   77.39    3.80
   5   1  -3   81.39    3.80
  -5  -1   3   78.19    3.90
   5   0  -3   -2.00    0.80
   5   0  -3   -1.00    0.90
  -5   0   3   -1.10    0.70
  -5   0   3    0.00    0.70
  -5   0   3   -0.60    0.90
   5  -1  -3   80.89    3.90
   5  -1  -3   76.39    3.80
  -5   1   3   78.89    4.50
  -5   1   3   86.59    3.90
   5  -2  -3   64.69    3.20
   5  -2  -3   68.19    3.30
  -5   2   3   60.79    3.20
  -5   2   3   54.79    3.80
   5  -3  -3   54.19    2.90
   5  -3  -3   44.80    2.70
  -5   3   3   49.10    2.80
  -5   3   3   43.30    2.60
   5  -4  -3    3.30    1.20
   5  -4  -3    4.50    1.20
  -5   4   3    2.90    1.10
  -5   4   3    5.30    1.30
  -5   4   3    0.30    1.40
   5  -5  -3   13.90    1.90
   5  -5  -3    8.80    1.50
   5  -5  -3    4.70    1.40
  -5   5   3   12.80    1.80
  -5   5   3    9.30    1.50
  -5   5   3   12.80    2.00
   5  -6  -3    1.30    1.30
   5  -6  -3    4.00    1.50
   5  -6  -3    2.60    1.80
  -5   6   3    3.80    1.50
  -5   6   3    5.60    1.40
  -5   6   3    1.50    1.70
   5  -7  -3   10.30    1.90
   5  -7  -3   13.20    1.50
   5  -7  -3    7.40    1.80
  -5   7   3   12.10    2.10
   5  -8  -3    4.00    1.70
   5  -8  -3    4.20    1.20
   5  -8  -3    0.50    1.60
  -5   8   3    4.70    1.90
   5  -9  -3   13.30    1.50
   5  -9  -3    7.70    2.10
   5  -9  -3    9.50    2.20
  -5   9   3    9.60    2.30
   5 -10  -3    2.40    1.10
   5 -10  -3    3.60    2.10
  -5  10   3   -2.40    2.10
   5 -11  -3    7.20    2.40
  -5  11   3   10.60    2.70
   5 -12  -3    6.80    2.50
  -5  12   3    3.70    2.60
   5 -13  -3    3.10    2.60
  -5  13   3    2.30    2.60
   5 -14  -3    9.60    3.00
  -5  14   3    9.30    3.00
   6  13  -3    2.30    2.70
   6  13  -3   -0.90    2.90
  -6 -13   3   -0.80    2.60
   6  12  -3    0.20    2.30
   6  12  -3   -2.20    2.70
   6  12  -3   -0.40    1.90
  -6 -12   3    3.20    2.80
   6  11  -3    5.50    2.50
   6  11  -3    8.10    2.80
  -6 -11   3    6.00    2.60
   6  10  -3    2.40    1.70
   6  10  -3    4.70    2.50
   6  10  -3    1.00    2.30
  -6 -10   3    5.50    2.40
   6   9  -3    5.70    2.20
   6   9  -3    7.90    2.60
   6   9  -3    3.60    1.70
  -6  -9   3    3.80    2.20
   6   8  -3    2.50    2.10
   6   8  -3   -0.60    1.60
   6   8  -3    1.30    1.40
  -6  -8   3   -1.40    1.80
   6   7  -3   14.90    2.30
   6   7  -3    9.90    1.80
   6   7  -3    8.60    2.00
   6   7  -3   11.50    1.60
  -6  -7   3   14.10    2.10
  -6  -7   3   10.30    2.10
   6   6  -3   21.40    2.30
   6   6  -3   41.30    3.40
   6   6  -3   32.30    2.70
   6   6  -3   23.30    2.40
  -6  -6   3   27.30    2.60
  -6  -6   3   35.40    3.00
   6   5  -3   21.80    1.90
  -6  -5   3   32.90    2.70
   6   4  -3   34.30    2.70
  -6  -4   3   49.50    3.00
  -6  -4   3   37.40    2.60
   6   3  -3    8.20    1.50
   6   3  -3    9.00    1.40
   6   3  -3    6.10    1.30
  -6  -3   3    8.00    1.40
  -6  -3   3    5.60    1.30
   6   2  -3    7.30    1.20
   6   2  -3    7.10    1.30
   6   2  -3    6.90    1.30
  -6  -2   3    6.00    1.20
  -6  -2   3    7.10    1.30
   6   1  -3    3.80    1.10
   6   1  -3    4.10    1.10
  -6  -1   3    3.70    1.00
  -6  -1   3    3.10    1.00
   6   0  -3   -0.90    0.90
   6   0  -3    0.50    0.90
  -6   0   3   -0.60    0.90
  -6   0   3    0.70    0.80
  -6   0   3   -1.20    0.80
  -6   1   3    4.20    1.00
  -6   1   3    1.40    1.10
   6  -2  -3    6.60    1.20
   6  -2  -3    6.00    1.30
  -6   2   3    8.30    1.20
  -6   2   3    6.50    1.20
  -6   2   3    5.20    1.40
   6  -3  -3    9.70    1.40
   6  -3  -3    5.20    1.30
  -6   3   3    5.20    1.50
  -6   3   3    6.00    1.20
  -6   3   3    6.10    1.30
   6  -4  -3   42.30    2.70
  -6   4   3   35.60    3.40
  -6   4   3   42.40    2.60
  -6   4   3   41.30    2.70
   6  -5  -3   16.00    1.80
   6  -6  -3   26.90    2.60
   6  -6  -3   40.50    3.40
  -6   6   3   33.00    2.70
  -6   6   3   33.70    3.60
  -6   6   3   33.10    2.80
   6  -7  -3   11.60    1.90
   6  -7  -3    7.10    1.70
  -6   7   3   11.40    1.90
   6  -8  -3    0.40    1.70
   6  -8  -3    1.50    1.20
   6  -8  -3    0.90    1.70
  -6   8   3    2.00    1.90
   6  -9  -3    4.70    2.00
   6  -9  -3    0.90    1.90
   6  -9  -3    6.70    1.30
  -6   9   3    6.50    2.30
   6 -10  -3    4.10    2.20
   6 -10  -3    2.70    1.20
   6 -10  -3    1.90    2.00
  -6  10   3    3.60    2.30
   6 -11  -3    4.80    2.30
  -6  11   3   10.70    2.70
   6 -12  -3    2.80    2.30
  -6  12   3    0.80    2.60
   6 -13  -3    1.60    2.40
  -6  13   3    4.60    2.80
   7  13  -3    2.80    2.90
   7  13  -3    1.80    3.30
  -7 -13   3    4.30    3.00
   7  12  -3    4.20    2.70
   7  12  -3    6.70    3.20
   7  12  -3    4.60    2.30
  -7 -12   3    5.50    2.70
   7  11  -3   -0.10    2.50
   7  11  -3    3.30    2.80
  -7 -11   3    6.40    2.70
   7  10  -3    5.40    1.90
   7  10  -3   15.90    3.10
   7  10  -3    6.50    2.30
  -7 -10   3    6.40    2.40
   7   9  -3   -2.10    1.50
   7   9  -3    0.50    2.00
   7   9  -3    3.30    2.50
  -7  -9   3    3.80    2.40
   7   8  -3    3.30    1.50
   7   8  -3    6.90    2.40
   7   8  -3    2.40    2.00
  -7  -8   3    6.90    2.20
   7   7  -3   16.30    2.30
   7   7  -3   11.30    2.30
   7   7  -3   12.50    2.10
   7   7  -3    8.50    1.60
  -7  -7   3   12.80    2.50
   7   6  -3    2.10    1.70
   7   6  -3    8.40    1.70
   7   6  -3    9.40    2.00
  -7  -6   3    8.10    1.80
  -7  -6   3    7.40    1.90
   7   5  -3    8.20    1.70
   7   5  -3   15.70    1.90
   7   5  -3   13.70    2.10
  -7  -5   3    9.20    1.80
  -7  -5   3   11.30    1.80
  -7  -5   3    9.90    1.80
   7   4  -3   11.70    1.80
   7   4  -3    5.10    1.50
  -7  -4   3   10.00    1.60
  -7  -4   3    5.90    1.40
  -7  -4   3    7.50    1.60
   7   3  -3    4.80    1.50
   7   3  -3    2.10    1.30
   7   3  -3    5.90    1.40
  -7  -3   3    1.10    1.30
  -7  -3   3    2.60    1.30
   7   2  -3    8.40    1.70
   7   2  -3    6.90    1.40
   7   2  -3    8.70    1.40
  -7  -2   3    8.10    1.50
  -7  -2   3    7.20    1.40
   7   1  -3    0.50    1.10
   7   1  -3    3.90    1.20
  -7  -1   3    3.50    1.10
  -7  -1   3    1.50    1.10
   7   0  -3    0.40    1.10
   7   0  -3    2.00    1.10
  -7   0   3    0.40    1.10
  -7   0   3    1.10    1.10
  -7   0   3   -2.70    0.90
   7  -1  -3    2.50    1.20
   7  -1  -3    3.20    1.20
  -7   1   3    1.70    1.10
  -7   1   3    0.30    1.10
  -7   1   3    0.60    1.20
   7  -2  -3    8.70    1.40
   7  -2  -3    7.60    1.30
  -7   2   3    6.70    1.30
  -7   2   3    8.40    1.30
   7  -3  -3    3.90    1.20
   7  -3  -3    5.00    1.30
  -7   3   3    3.80    1.20
  -7   3   3    2.80    1.10
  -7   3   3   -2.20    1.40
   7  -4  -3    7.90    1.40
  -7   4   3    9.20    1.50
  -7   4   3    8.80    1.90
  -7   4   3    6.00    1.30
   7  -5  -3    8.90    1.50
   7  -5  -3   11.60    1.70
  -7   5   3   13.00    1.60
  -7   5   3   12.40    1.70
  -7   5   3    3.80    1.90
   7  -6  -3    6.80    1.60
   7  -6  -3    2.80    1.50
  -7   6   3    9.20    1.80
   7  -7  -3   14.80    2.10
   7  -7  -3    9.00    1.90
  -7   7   3   11.20    2.10
   7  -8  -3    1.40    1.70
   7  -8  -3    5.30    1.50
   7  -8  -3    7.90    2.00
  -7   8   3    6.90    2.10
   7  -9  -3    2.60    1.90
   7  -9  -3    1.20    1.90
   7  -9  -3    2.40    1.40
  -7   9   3    1.60    2.00
   7 -10  -3    5.70    2.30
   7 -10  -3    7.70    2.20
  -7  10   3    7.60    2.50
   7 -11  -3    0.90    2.20
  -7  11   3   -0.40    2.30
   7 -12  -3    6.20    2.40
  -7  12   3    4.60    2.70
   7 -13  -3   -0.10    2.20
   8  13  -3    0.30    2.70
   8  13  -3   -3.00    3.10
  -8 -13   3    4.00    3.10
   8  12  -3    6.20    2.60
   8  12  -3    2.90    3.20
  -8 -12   3    3.70    2.70
   8  11  -3    0.70    2.90
   8  11  -3   -1.60    2.30
  -8 -11   3   -1.00    2.40
   8  10  -3    1.60    2.30
   8  10  -3    5.90    2.80
  -8 -10   3    5.40    2.40
   8   9  -3    2.30    2.20
   8   9  -3    2.20    2.50
   8   9  -3    2.00    1.50
  -8  -9   3    3.70    2.40
   8   8  -3    4.80    2.50
   8   8  -3    8.80    2.30
   8   8  -3   11.80    1.60
  -8  -8   3   11.40    2.60
   8   7  -3   -0.20    1.80
   8   7  -3    1.10    1.80
   8   7  -3    1.00    2.20
   8   7  -3    1.00    1.00
  -8  -7   3    1.00    2.00
   8   6  -3    4.90    1.70
   8   6  -3    4.70    2.00
   8   6  -3    0.80    1.60
  -8  -6   3    4.40    1.80
   8   5  -3    3.40    1.90
   8   5  -3    2.80    1.60
   8   5  -3    4.50    1.60
  -8  -5   3    5.30    1.60
  -8  -5   3    3.40    1.70
   8   4  -3   22.40    2.40
   8   4  -3   17.60    2.10
   8   4  -3   21.60    2.20
  -8  -4   3   18.90    2.20
  -8  -4   3   19.60    2.10
   8   3  -3    5.80    1.40
   8   3  -3    7.20    1.70
   8   3  -3    4.80    1.40
  -8  -3   3    3.30    1.40
  -8  -3   3    6.80    1.40
   8   2  -3    5.00    1.40
   8   2  -3    2.00    1.30
   8   2  -3    4.30    1.70
  -8  -2   3    5.70    1.40
  -8  -2   3    6.50    1.30
   8   1  -3    4.30    1.40
   8   1  -3    5.10    1.30
   8   1  -3    5.50    1.30
  -8  -1   3    5.60    1.30
  -8  -1   3    5.60    1.20
   8   0  -3    2.50    1.20
   8   0  -3    2.50    1.20
  -8   0   3   -0.20    1.10
  -8   0   3   -3.20    0.90
  -8   0   3    0.70    1.10
   8  -1  -3    3.70    1.20
   8  -1  -3    6.30    1.30
  -8   1   3    4.00    1.30
  -8   1   3    4.20    1.20
  -8   1   3    4.00    1.20
   8  -2  -3    3.10    1.20
   8  -2  -3    5.80    1.40
  -8   2   3    6.10    1.30
  -8   2   3    6.30    1.30
   8  -3  -3    5.10    1.30
   8  -3  -3    7.40    1.50
  -8   3   3    7.80    1.40
  -8   3   3    6.50    1.30
  -8   3   3    3.20    1.60
   8  -4  -3   16.80    1.90
  -8   4   3   21.30    1.90
  -8   4   3   17.80    2.50
  -8   4   3   20.00    2.00
   8  -5  -3    1.90    1.30
   8  -5  -3    3.00    1.40
  -8   5   3    4.40    1.80
  -8   5   3    4.40    1.60
   8  -6  -3    1.30    1.50
   8  -6  -3    3.00    1.50
  -8   6   3    6.20    1.80
   8  -7  -3    0.40    1.50
   8  -7  -3    0.10    1.70
  -8   7   3    0.30    1.80
   8  -8  -3   11.00    2.20
   8  -8  -3   11.10    2.10
  -8   8   3    9.90    2.20
   8  -9  -3    3.60    1.50
   8  -9  -3    1.90    2.00
   8  -9  -3    3.40    2.00
  -8   9   3    3.90    2.10
   8 -10  -3    4.00    2.20
  -8  10   3    4.60    2.30
   8 -11  -3   -0.80    2.00
  -8  11   3   -0.40    2.30
   8 -12  -3    7.90    2.60
   8 -13  -3    4.40    2.60
   9  12  -3   -1.40    3.10
   9  12  -3    4.20    2.80
  -9 -12   3    3.60    2.90
   9  11  -3    9.50    3.30
   9  11  -3    5.80    2.80
  -9 -11   3    6.80    2.90
   9  10  -3    2.30    2.30
   9  10  -3    2.70    2.80
  -9 -10   3    3.10    2.50
   9   9  -3   18.10    3.10
   9   9  -3    8.50    2.40
  -9  -9   3   11.00    2.70
   9   8  -3    3.40    2.40
   9   8  -3   -1.60    1.10
   9   8  -3    1.90    2.10
  -9  -8   3    2.80    2.20
   9   7  -3   19.20    2.60
   9   7  -3   17.00    2.90
   9   7  -3   23.00    2.70
  -9  -7   3   21.50    2.80
   9   6  -3    8.70    2.30
   9   6  -3    7.60    2.00
   9   6  -3   10.70    2.10
  -9  -6   3    8.10    2.10
   9   5  -3    4.60    1.80
   9   5  -3    8.80    2.20
   9   5  -3    8.20    1.80
  -9  -5   3    5.60    1.80
   9   4  -3   22.50    2.40
   9   4  -3   23.80    2.40
   9   4  -3   23.20    2.60
  -9  -4   3   24.60    2.40
   9   3  -3    6.50    2.00
   9   3  -3    2.60    1.40
   9   3  -3    3.30    1.40
  -9  -3   3    3.70    1.50
  -9  -3   3    6.20    1.70
   9   2  -3    5.40    1.50
   9   2  -3    2.20    1.80
   9   2  -3    6.00    1.40
  -9  -2   3    5.40    1.40
  -9  -2   3    4.00    1.50
   9   1  -3    8.70    1.60
   9   1  -3   12.30    2.00
   9   1  -3    9.40    1.60
  -9  -1   3    9.20    1.50
  -9  -1   3    9.20    1.50
   9   0  -3    0.70    1.20
   9   0  -3   -0.60    1.20
  -9   0   3    0.40    1.20
  -9   0   3   -0.20    1.10
   9  -1  -3    7.70    1.40
   9  -1  -3    9.00    1.50
  -9   1   3    8.10    1.40
  -9   1   3    7.50    1.40
  -9   1   3   10.10    1.50
   9  -2  -3    6.80    1.50
   9  -2  -3    5.60    1.40
  -9   2   3    5.90    1.40
  -9   2   3    4.70    1.40
  -9   2   3    3.20    1.50
   9  -3  -3    3.20    1.40
   9  -3  -3    2.60    1.50
  -9   3   3    5.70    1.30
  -9   3   3    5.10    1.70
  -9   3   3    4.00    1.40
   9  -4  -3   23.90    2.20
   9  -4  -3   26.00    2.40
  -9   4   3   18.80    2.70
  -9   4   3   28.30    2.40
  -9   4   3   24.60    2.20
   9  -5  -3    0.90    1.40
   9  -5  -3    6.00    1.60
  -9   5   3    4.10    2.10
  -9   5   3    8.40    1.70
   9  -6  -3    8.40    1.80
   9  -6  -3    9.40    1.80
  -9   6   3   10.10    2.00
   9  -7  -3   20.00    2.40
   9  -7  -3   18.40    2.30
  -9   7   3   23.80    2.60
   9  -8  -3    0.10    1.80
   9  -8  -3    4.00    1.80
  -9   8   3    3.10    2.00
   9  -9  -3   14.40    2.40
  -9   9   3   15.80    2.60
   9 -10  -3    3.40    2.10
  -9  10   3    0.90    2.20
   9 -11  -3    6.30    2.30
   9 -12  -3   -0.40    2.20
  10  12  -3   -0.70    3.30
  10  12  -3   -0.80    2.60
 -10 -12   3   -0.60    2.60
  10  11  -3    2.40    3.10
  10  11  -3    4.50    2.70
 -10 -11   3    0.40    2.60
  10  10  -3    2.20    2.90
  10  10  -3    3.90    2.40
 -10 -10   3    5.20    2.60
  10   9  -3    2.80    2.70
  10   9  -3   -1.20    2.10
 -10  -9   3   -1.00    2.30
  10   8  -3   -3.50    2.30
  10   8  -3   -3.30    1.90
 -10  -8   3    0.90    2.20
  10   7  -3   -0.40    2.20
  10   7  -3    0.20    1.90
  10   7  -3   -2.10    2.00
 -10  -7   3    2.40    2.20
  10   6  -3   -0.20    1.90
  10   6  -3    0.40    1.80
  10   6  -3    2.50    2.30
 -10  -6   3    3.60    2.10
  10   5  -3    0.80    1.70
  10   5  -3    0.20    1.70
  10   5  -3    0.30    2.10
 -10  -5   3   -0.40    1.70
  10   4  -3   11.30    1.90
  10   4  -3   11.80    2.00
  10   4  -3   11.60    2.40
 -10  -4   3    7.30    2.00
  10   3  -3    3.60    1.50
  10   3  -3    5.50    2.00
  10   3  -3    5.70    1.70
 -10  -3   3    3.70    1.70
  10   2  -3   26.80    2.50
  10   2  -3   28.60    3.10
  10   2  -3   26.90    2.30
 -10  -2   3   25.80    2.40
  10   1  -3    0.10    1.30
  10   1  -3    1.10    1.70
  10   1  -3    2.60    1.30
 -10  -1   3    0.30    1.30
 -10  -1   3    0.40    1.30
  10   0  -3    2.70    1.30
  10   0  -3    1.30    1.30
 -10   0   3   -1.50    1.20
 -10   0   3    0.60    1.20
  10  -1  -3   -0.10    1.30
  10  -1  -3    1.20    1.40
 -10   1   3    0.70    1.30
 -10   1   3    0.60    0.70
 -10   1   3    0.80    1.20
  10  -2  -3   26.60    2.30
  10  -2  -3   27.70    2.50
 -10   2   3   25.60    2.70
 -10   2   3   25.30    2.30
 -10   2   3   26.00    2.30
  10  -3  -3    5.40    1.50
  10  -3  -3    6.20    1.70
 -10   3   3    6.90    1.90
 -10   3   3    3.30    1.50
  10  -4  -3   11.30    1.80
  10  -4  -3   11.70    1.90
 -10   4   3    6.90    2.20
 -10   4   3   11.30    1.80
  10  -5  -3   -0.40    1.40
  10  -5  -3    1.30    1.50
 -10   5   3    0.10    1.40
  10  -6  -3    0.00    1.60
  10  -6  -3   -0.10    1.50
 -10   6   3   -1.00    1.60
  10  -7  -3    1.70    1.60
  10  -7  -3   -0.20    1.60
 -10   7   3    0.40    1.80
  10  -8  -3   -0.20    1.70
 -10   8   3    0.70    1.90
  10  -9  -3    0.20    1.80
 -10   9   3    1.90    2.20
  10 -10  -3    4.10    2.10
  10 -11  -3   -1.10    2.10
  10 -12  -3    0.70    2.30
  11  11  -3   -2.30    3.10
  11  11  -3    4.40    2.80
 -11 -11   3    4.90    3.00
  11  10  -3    4.50    2.60
  11  10  -3    8.20    3.10
 -11 -10   3    5.50    2.80
  11   9  -3    4.40    2.40
  11   9  -3    1.40    2.70
 -11  -9   3    1.40    2.30
  11   8  -3    2.30    2.70
  11   8  -3    3.50    2.20
 -11  -8   3    4.70    2.40
  11   7  -3    1.60    2.00
  11   7  -3    0.00    2.40
 -11  -7   3    0.50    2.20
  11   6  -3    4.50    2.40
  11   6  -3    4.90    1.90
  11   6  -3    4.50    2.00
 -11  -6   3    3.10    2.00
  11   5  -3    3.50    1.90
  11   5  -3    4.50    1.90
  11   5  -3    1.10    2.30
 -11  -5   3    4.00    2.00
  11   4  -3   12.00    2.60
  11   4  -3    4.90    1.90
  11   4  -3   10.70    2.00
 -11  -4   3    5.20    1.90
  11   3  -3   12.30    2.50
  11   3  -3    7.80    1.80
  11   3  -3   10.70    1.90
 -11  -3   3    9.90    2.00
  11   2  -3    0.80    1.50
  11   2  -3    2.00    2.20
  11   2  -3    3.60    1.60
 -11  -2   3    3.00    1.60
  11   1  -3    3.40    2.20
  11   1  -3    2.40    1.50
  11   1  -3    5.10    1.60
 -11  -1   3    0.90    1.60
  11   0  -3    2.70    1.50
  11   0  -3    0.30    1.50
 -11   0   3    2.00    1.40
  11  -1  -3    3.10    1.60
  11  -1  -3    3.00    1.50
 -11   1   3    2.20    1.50
  11  -2  -3    5.50    1.70
  11  -2  -3    4.00    1.50
 -11   2   3   -1.50    1.60
 -11   2   3    3.00    1.40
  11  -3  -3   11.30    2.00
  11  -3  -3   10.20    1.80
 -11   3   3    8.40    2.20
 -11   3   3   10.40    1.90
  11  -4  -3    5.60    1.80
  11  -4  -3    6.10    1.70
 -11   4   3    4.40    1.60
 -11   4   3    4.70    2.20
  11  -5  -3    4.10    1.60
  11  -5  -3    0.60    1.60
 -11   5   3    5.50    1.80
  11  -6  -3    1.10    1.60
  11  -6  -3    3.60    1.70
 -11   6   3    2.80    1.80
  11  -7  -3    1.60    1.70
 -11   7   3    0.60    1.70
  11  -8  -3    4.50    1.80
  11  -9  -3    0.50    1.80
  11 -10  -3    5.30    2.10
  11 -11  -3    1.60    2.10
  12  10  -3    2.10    3.00
  12  10  -3    5.70    2.90
 -12 -10   3   -1.00    2.60
  12   9  -3    1.20    2.30
  12   9  -3   -4.30    2.60
 -12  -9   3    2.10    2.50
  12   8  -3    1.70    2.70
  12   8  -3    2.50    2.30
 -12  -8   3   -1.70    2.20
  12   7  -3    1.40    2.60
  12   7  -3    0.90    2.00
 -12  -7   3    2.00    2.20
  12   6  -3    3.80    2.20
  12   6  -3    3.60    2.60
  12   6  -3    3.70    2.00
 -12  -6   3    5.60    2.20
  12   5  -3    0.30    1.80
  12   5  -3    2.60    1.90
  12   5  -3    2.70    2.50
 -12  -5   3    3.30    2.00
  12   4  -3   -0.20    1.70
  12   4  -3    0.40    1.70
  12   4  -3    0.90    2.30
 -12  -4   3    3.70    1.90
  12   3  -3    0.70    1.70
  12   3  -3    3.80    2.50
  12   3  -3    2.80    1.70
 -12  -3   3    2.50    1.80
  12   2  -3   -0.20    1.60
  12   2  -3    1.90    2.30
  12   2  -3   -0.40    1.60
 -12  -2   3    0.20    1.60
  12   1  -3   -1.90    1.60
  12   1  -3    0.10    1.50
  12   1  -3    1.80    2.20
 -12  -1   3   -1.50    1.50
  12   0  -3   -1.10    1.50
  12   0  -3   -0.60    1.60
 -12   0   3    1.40    1.50
  12  -1  -3    0.20    1.60
  12  -1  -3    0.20    1.50
 -12   1   3    1.30    1.50
  12  -2  -3    2.30    1.70
  12  -2  -3    0.70    1.50
 -12   2   3   -1.30    1.40
 -12   2   3    1.00    1.70
  12  -3  -3    0.50    1.70
  12  -3  -3    3.30    1.60
 -12   3   3    4.40    1.60
 -12   3   3    1.20    1.80
  12  -4  -3    0.60    1.70
  12  -4  -3   -1.20    1.40
 -12   4   3    1.10    1.50
  12  -5  -3    0.40    1.60
 -12   5   3    2.80    1.60
  12  -6  -3    3.60    1.80
  12  -7  -3    2.10    1.70
  12  -8  -3    0.60    1.80
  12  -9  -3   -2.50    1.70
  12 -10  -3    3.70    2.20
  13   9  -3    3.30    2.60
  13   9  -3    6.00    3.20
  13   8  -3    0.20    2.40
  13   8  -3    2.80    2.90
  13   7  -3    6.30    2.30
  13   7  -3    7.70    3.00
 -13  -7   3    3.80    2.40
  13   6  -3   -1.60    1.90
  13   6  -3    0.40    2.60
 -13  -6   3   -0.20    2.00
  13   5  -3   10.70    3.00
  13   5  -3    7.80    2.20
 -13  -5   3    7.20    2.20
  13   4  -3    0.20    2.40
  13   4  -3    2.90    1.80
 -13  -4   3    2.70    1.90
  13   3  -3    6.70    2.80
  13   3  -3    2.10    1.80
 -13  -3   3    0.00    1.70
  13   2  -3    5.50    2.50
  13   2  -3    2.80    1.80
  13   2  -3    1.40    1.70
 -13  -2   3    1.70    1.70
  13   1  -3   -0.80    1.60
  13   1  -3    1.30    1.70
  13   1  -3   -1.20    2.30
 -13  -1   3   -1.20    1.60
  13   0  -3    4.90    2.50
  13   0  -3    1.30    1.60
  13   0  -3    2.70    1.80
 -13   0   3    2.10    1.70
  13  -1  -3    0.40    1.50
  13  -1  -3    1.10    1.70
 -13   1   3   -0.60    1.40
  13  -2  -3    4.10    1.60
  13  -2  -3    3.00    1.80
 -13   2   3    1.70    1.60
  13  -3  -3    4.70    1.60
 -13   3   3    2.70    2.10
 -13   3   3    4.80    1.70
  13  -4  -3    1.30    1.50
  13  -5  -3    6.90    1.80
  13  -6  -3    0.90    1.70
  13  -7  -3    7.30    2.00
  13  -8  -3    1.70    1.90
  13  -9  -3    2.80    2.00
  14   8  -3   -0.90    2.30
  14   8  -3   -0.80    2.90
  14   7  -3    2.30    2.30
  14   7  -3    0.00    2.90
  14   6  -3   -0.10    1.90
  14   6  -3   -1.40    2.80
  14   5  -3   -1.60    1.90
  14   5  -3    1.60    2.80
  14   4  -3   -1.70    2.50
  14   4  -3    1.60    1.80
  14   3  -3    0.30    1.80
  14   3  -3    1.80    2.70
  14   2  -3    1.50    2.50
  14   2  -3    1.60    1.70
  14   1  -3    1.90    1.70
  14   1  -3    1.60    2.60
  14   0  -3   -0.30    2.60
  14   0  -3    2.20    1.70
  14  -1  -3    2.30    1.60
  14  -2  -3    0.90    1.50
  14  -3  -3    0.80    1.60
  14  -4  -3    2.30    1.60
  14  -5  -3   -3.10    1.50
  14  -6  -3   -1.30    1.60
  14  -7  -3    2.00    1.80
  14  -8  -3   -0.20    1.90
  15   7  -3    1.20    3.10
  15   7  -3   -1.60    2.20
  15   6  -3    3.60    2.10
  15   6  -3   -3.40    2.90
  15   5  -3    1.80    2.90
  15   5  -3    0.60    1.90
  15   4  -3    1.90    1.90
  15   4  -3    0.60    2.80
  15   3  -3    3.20    1.90
  15   3  -3    3.40    3.00
  15   2  -3    2.30    1.80
  15   2  -3   -0.20    2.80
  15   1  -3    6.10    1.90
  15   1  -3    9.60    3.10
  15   0  -3   -1.40    1.60
  15   0  -3   -0.80    2.80
  15  -1  -3    5.90    1.80
  15  -1  -3   10.70    3.10
  15  -2  -3   -0.50    1.50
  15  -3  -3    0.30    1.60
  15  -4  -3    2.90    1.80
  15  -5  -3   -0.70    1.60
  15  -6  -3    3.20    1.80
  15  -7  -3    1.50    1.90
  16   5  -3    0.70    3.10
  16   5  -3    0.50    2.00
  16   4  -3    2.60    3.00
  16   4  -3    5.90    2.20
  16   3  -3    0.30    1.80
  16   3  -3    6.90    3.20
  16   2  -3    1.90    3.10
  16   2  -3   -1.50    1.80
  16   1  -3    1.20    3.00
  16   1  -3   -1.20    1.70
  16   0  -3    1.80    1.70
  16   0  -3   -0.90    2.70
  16  -1  -3   -0.40    1.60
  16  -1  -3    2.50    3.00
  16  -2  -3    0.90    1.80
  16  -3  -3    0.50    1.60
  16  -4  -3    1.00    1.70
  16  -5  -3   -0.40    1.70
  17   3  -3    0.50    1.90
  17   3  -3   -0.60    3.10
  17   2  -3    1.40    3.30
  17   2  -3    4.10    2.00
  17   1  -3    0.20    1.80
  17   1  -3   -0.60    3.00
  17   0  -3   -1.10    1.70
  17   0  -3    0.00    3.10
  17  -1  -3   -2.80    1.60
  17  -1  -3   -0.70    3.00
  17  -2  -3    0.90    3.10
  17  -2  -3    0.70    1.70
  17  -3  -3    0.50    1.80
  16  -2   4   -3.20    2.80
  16  -1   4   23.70    4.40
  16   0   4    6.90    3.60
  16   1   4   25.80    4.50
  16   1   4   25.20    2.40
  16   2   4    0.10    1.40
  16   2   4    4.00    3.30
  15  -5   4   -0.50    3.10
  15  -4   4   20.40    3.80
  15  -3   4   13.40    3.50
  15  -3   4   10.10    3.10
  15  -2   4    8.50    3.20
  15  -1   4    6.60    1.20
  15  -1   4    7.70    3.30
  15   0   4   22.50    2.10
  15   0   4   23.90    3.90
  15   1   4    8.70    1.50
  15   1   4    4.60    3.50
  15   2   4   11.00    3.50
  15   2   4    4.90    1.50
  15   3   4   13.40    3.80
  15   3   4   13.00    2.00
  15   4   4   22.80    2.60
  15   4   4   29.70    4.60
  15   5   4    0.10    3.30
  15   5   4    1.50    1.90
  14  -7   4    0.20    3.40
  14  -7   4    3.50    1.30
  14  -6   4    6.90    1.40
  14  -6   4    4.50    3.20
  14  -5   4    5.50    3.10
  14  -5   4    7.30    1.20
  14  -4   4   13.50    3.30
  14  -4   4   17.30    1.50
  14  -3   4   10.70    1.20
  14  -3   4   12.10    3.00
  14  -2   4   16.00    3.10
  14  -2   4   21.00    3.60
  14  -2   4   18.70    1.70
  14  -1   4    7.30    3.10
  14  -1   4    4.80    1.20
  14  -1   4    5.20    2.40
  14   0   4   13.70    3.40
  14   0   4   13.70    1.50
  14   0   4   12.20    2.50
  14   1   4    7.00    3.30
  14   1   4    4.30    1.30
  14   2   4   23.90    3.80
  14   2   4   21.40    2.10
  14   3   4   11.70    1.90
  14   3   4   11.90    3.30
  14   4   4   16.90    2.20
  14   4   4   19.50    3.80
  14   5   4    4.50    1.90
  14   5   4    9.20    3.40
  14   6   4    9.30    2.30
  14   6   4    2.80    3.50
  14   7   4    4.60    3.60
  14   7   4    3.60    2.30
  13  -8   4   10.10    1.80
  13  -8   4    3.30    3.60
  13  -7   4   49.30    3.10
  13  -7   4   53.59    5.80
  13  -6   4   11.50    3.60
  13  -6   4   17.00    1.70
  13  -5   4   70.59    3.60
  13  -5   4   66.49    6.00
  13  -4   4   21.70    3.70
  13  -4   4   22.70    1.80
  13  -3   4   58.79    3.00
  13  -3   4   49.60    5.20
  13  -2   4   21.60    1.80
  13  -2   4   26.30    3.70
  13  -2   4   23.40    3.40
  13  -1   4   66.79    3.40
  13  -1   4   60.19    5.60
  13  -1   4   66.19    5.10
  13   0   4    8.40    3.00
  13   0   4    4.90    1.20
  13   0   4    7.40    2.10
  13   1   4   64.69    4.60
  13   1   4   63.09    5.70
  13   1   4   63.69    3.60
  13   2   4   29.20    4.10
  13   2   4   24.90    2.60
  13   2   4   26.10    2.30
  13   3   4   62.69    3.90
  13   3   4   70.19    5.90
  13   4   4   23.00    4.00
  13   4   4   24.50    2.60
  13   5   4   73.49    4.60
  13   5   4   75.39    6.50
  13   6   4   13.70    2.40
  13   6   4   14.50    3.60
  13   7   4   48.70    4.10
  13   7   4   52.29    5.50
  13   8   4    6.00    3.50
  13   8   4   12.50    2.70
  12  -9   4   -0.60    1.60
  12  -9   4    1.70    3.60
  12  -8   4   -2.20    3.10
  12  -8   4   -0.50    1.40
  12  -7   4    3.50    1.40
  12  -7   4    3.60    3.10
  12  -6   4    2.80    2.80
  12  -6   4    0.80    1.20
  12  -5   4   16.90    1.60
  12  -5   4   21.10    3.70
  12  -4   4    5.50    2.60
  12  -4   4    4.10    1.10
  12  -3   4    3.20    0.90
  12  -3   4    3.70    2.50
  12  -3   4    4.10    1.00
  12  -2   4   16.50    2.90
  12  -2   4   17.10    1.50
  12  -1   4    3.40    2.00
  12  -1   4    2.50    2.40
  12  -1   4    2.80    1.00
  12  -1   4   -0.40    1.10
 -12   0  -4   28.40    1.70
 -12   0  -4   24.90    1.70
  12   0   4   25.60    2.00
  12   0   4   26.80    2.90
  12   0   4   27.90    3.60
  12   0   4   23.90    2.20
 -12  -1  -4    2.40    1.10
 -12  -1  -4   -0.20    1.10
  12   1   4    3.30    2.50
  12   1   4    1.40    1.20
  12   1   4    0.30    1.60
  12   1   4    2.10    1.20
  12   2   4   15.00    3.20
  12   2   4   16.20    1.80
  12   2   4   19.30    1.90
  12   2   4   16.90    2.10
  12   3   4    6.60    2.60
  12   3   4    3.00    1.40
  12   3   4    4.30    1.50
  12   4   4    3.40    1.30
  12   4   4    2.90    2.90
  12   4   4    4.20    1.60
  12   5   4   16.30    2.30
  12   5   4   18.30    3.30
  12   6   4    0.40    2.80
  12   6   4    1.00    1.90
  12   7   4    6.10    3.10
  12   7   4    2.20    2.00
  12   8   4   -2.50    3.00
  12   8   4    2.80    2.20
  12   9   4    2.80    3.10
  12   9   4   -0.60    2.20
  11 -10   4   59.39    4.10
  11 -10   4   64.39    7.00
  11  -9   4   -1.70    3.30
  11  -9   4    0.70    1.60
  11  -8   4   86.19    4.70
  11  -8   4   88.79    7.30
  11  -7   4    1.60    1.30
  11  -7   4   -2.60    2.80
  11  -6   4   87.99    6.90
  11  -6   4   93.49    4.60
 -11   5  -4    7.30    1.00
  11  -5   4    5.50    2.90
  11  -5   4    7.00    1.30
  11  -5   4    8.40    1.30
  11  -4   4   96.69    6.80
  11  -4   4   97.29    4.60
  11  -4   4   96.69    4.60
  11  -3   4    6.30    1.10
  11  -3   4    6.80    1.00
  11  -3   4    8.00    2.50
  11  -2   4  116.99    7.20
  11  -2   4  110.99    5.10
  11  -1   4    3.20    1.10
  11  -1   4    0.50    0.90
  11  -1   4    2.10    2.30
  11  -1   4    4.90    2.00
 -11   0  -4  298.67   13.50
 -11   0  -4  326.67   13.50
  11   0   4  315.07   13.60
  11   0   4  320.47   15.40
  11   0   4  326.57   16.40
  11   0   4  311.97   13.70
 -11  -1  -4    3.50    1.10
 -11  -1  -4    3.50    1.10
  11   1   4    2.90    1.20
  11   1   4    3.80    1.30
  11   1   4    5.60    2.50
  11   1   4    2.90    1.60
 -11  -2  -4  110.09    5.30
  11   2   4  113.79    5.40
  11   2   4  106.89    5.40
  11   2   4  113.79    6.90
  11   2   4  113.29    6.30
 -11  -3  -4    7.40    1.60
  11   3   4    7.00    1.40
  11   3   4    8.60    1.60
  11   3   4    5.70    2.50
  11   3   4    6.30    1.50
 -11  -4  -4   93.79    5.00
  11   4   4   92.59    5.00
  11   4   4  101.59    6.60
  11   4   4   94.19    5.00
  11   4   4   89.79    5.20
 -11  -5  -4    6.70    1.90
  11   5   4    8.10    1.90
  11   5   4    6.40    2.60
 -11  -6  -4   98.19    5.60
  11   6   4  102.09    5.60
  11   6   4   96.69    7.00
 -11  -7  -4    2.10    2.10
  11   7   4    1.30    2.80
  11   7   4   -2.00    1.80
  11   8   4   92.09    7.00
  11   8   4   85.99    5.60
  11   9   4   -1.70    3.00
  11   9   4   -0.80    2.20
  11  10   4   70.89    5.20
  11  10   4   71.99    6.50
  11  10   4   72.79    6.70
  10 -11   4   -5.60    3.40
  10 -11   4   -1.30    1.80
  10 -10   4   12.10    2.10
  10 -10   4    6.00    3.80
  10  -9   4   -0.40    1.60
  10  -9   4    0.80    3.30
  10  -8   4    0.50    1.40
  10  -8   4   -1.90    2.90
  10  -7   4    0.20    1.30
  10  -7   4    0.10    2.90
 -10   6  -4   -0.20    1.20
  10  -6   4    2.10    2.70
  10  -6   4   -0.30    1.20
  10  -6   4   -0.80    1.20
 -10   5  -4  118.89    5.40
 -10   5  -4  117.19    5.40
  10  -5   4  128.09    7.90
  10  -5   4  117.39    5.50
  10  -5   4  110.29    5.50
 -10   4  -4    2.10    0.80
 -10   4  -4    2.70    0.80
  10  -4   4    1.00    2.40
  10  -4   4    3.90    1.00
  10  -4   4    2.50    1.00
  10  -3   4   12.90    2.70
  10  -3   4   12.60    1.20
  10  -3   4   15.00    1.30
  10  -2   4    2.00    2.00
  10  -2   4    1.40    0.90
  10  -1   4   12.20    2.40
  10  -1   4   13.10    1.30
  10  -1   4   12.50    2.10
  10  -1   4    7.70    1.10
 -10   0  -4   44.70    2.30
 -10   0  -4   39.90    2.30
  10   0   4   42.60    2.50
  10   0   4   45.90    2.60
  10   0   4   43.60    3.50
  10   0   4   45.10    3.90
 -10  -1  -4    7.60    1.20
 -10  -1  -4   12.80    1.30
  10   1   4   10.10    2.40
  10   1   4    8.90    1.30
  10   1   4   14.00    1.40
  10   1   4   10.40    1.80
 -10  -2  -4    1.90    1.10
 -10  -2  -4    2.10    1.10
  10   2   4    0.20    2.20
  10   2   4    1.10    1.20
  10   2   4    3.10    1.30
  10   2   4    0.80    1.20
 -10  -3  -4   15.40    1.80
  10   3   4    8.60    2.60
  10   3   4   12.20    1.70
  10   3   4   13.50    1.70
  10   3   4   11.60    1.70
 -10  -4  -4    0.40    1.50
  10   4   4    2.50    2.40
  10   4   4   -0.40    1.50
  10   4   4    5.80    1.60
 -10  -5  -4  112.39    6.10
  10   5   4  121.79    6.10
  10   5   4  130.19    7.30
  10   5   4  109.89    6.00
 -10  -6  -4   -3.10    1.60
  10   6   4    1.10    2.60
  10   6   4    0.40    1.80
  10   6   4    1.60    1.80
 -10  -7  -4   -0.40    1.80
  10   7   4    0.60    1.90
  10   7   4   -2.30    2.50
 -10  -8  -4    0.20    2.00
  10   8   4    0.70    2.10
  10   8   4    3.80    2.80
 -10  -9  -4    0.30    2.20
  10   9   4   -0.60    2.60
  10   9   4   -1.00    2.90
  10   9   4   -1.10    2.10
  10  10   4   11.60    2.70
  10  10   4    7.30    3.70
  10  10   4    8.00    3.10
  10  11   4    2.30    3.50
  10  11   4   -2.50    2.70
  10  11   4    0.70    2.50
   9 -12   4    2.70    4.10
   9 -12   4    6.70    2.30
   9 -11   4   69.79    4.70
   9 -11   4   66.39    7.10
   9 -10   4   -1.30    1.70
   9 -10   4    2.50    3.30
   9  -9   4  133.49    6.80
   9  -9   4  138.39    9.40
   9  -8   4    7.00    1.70
   9  -8   4    8.10    3.20
  -9   7  -4  168.78    8.00
   9  -7   4  186.58    8.20
   9  -7   4  168.18   10.70
   9  -7   4  172.48    8.00
  -9   6  -4   37.00    2.50
   9  -6   4   28.50    2.50
   9  -6   4   38.10    4.20
   9  -6   4   29.60    2.50
  -9   5  -4  140.19    6.30
  -9   5  -4  132.09    6.30
   9  -5   4  138.29    6.40
   9  -5   4  133.39    8.60
   9  -5   4  148.59    6.40
  -9   4  -4   26.90    1.70
  -9   4  -4   31.00    1.80
   9  -4   4   47.00    4.10
   9  -4   4   29.10    2.00
   9  -4   4   21.30    1.90
  -9   3  -4  233.78    9.80
  -9   3  -4  220.98    9.70
   9  -3   4  233.08    9.90
   9  -3   4  228.08   12.40
   9  -3   4  230.18    9.90
   9  -2   4   20.40    2.50
   9  -2   4   12.10    1.10
   9  -1   4  365.26   18.50
   9  -1   4  357.46   15.40
   9  -1   4  361.76   15.40
  -9   0  -4   10.50    1.10
  -9   0  -4   18.10    1.30
   9   0   4   12.40    1.20
   9   0   4   14.70    2.30
  -9  -1  -4  362.06   14.90
  -9  -1  -4  339.07   15.00
   9   1   4  359.76   15.00
   9   1   4  347.67   15.00
   9   1   4  352.16   16.50
   9   1   4  339.37   17.70
  -9  -2  -4   18.90    1.70
  -9  -2  -4   14.00    1.60
   9   2   4   20.20    2.70
   9   2   4   26.40    2.20
   9   2   4   24.20    1.90
   9   2   4   15.50    1.70
  -9  -3  -4  223.78   10.20
  -9  -3  -4  232.98   10.10
   9   3   4  229.48   10.20
   9   3   4  217.88   11.30
   9   3   4  230.08   10.20
  -9  -4  -4   26.50    2.40
   9   4   4   33.60    2.50
   9   4   4   27.00    3.00
   9   4   4   19.80    2.20
  -9  -5  -4  137.39    6.80
   9   5   4  138.49    6.70
   9   5   4  125.99    7.90
   9   5   4  140.59    6.80
  -9  -6  -4   38.10    3.30
   9   6   4   39.80    3.20
   9   6   4   37.90    4.10
   9   6   4   28.90    3.00
  -9  -7  -4  178.88    9.00
   9   7   4  180.88   10.00
   9   7   4  186.18    8.90
   9   7   4  184.28    9.80
   9   7   4  181.48    9.00
  -9  -8  -4    6.90    2.20
   9   8   4    2.30    2.10
   9   8   4    9.40    2.90
   9   8   4   10.90    2.20
  -9  -9  -4  145.39    7.60
   9   9   4  126.69    8.50
   9   9   4  140.89    7.60
   9   9   4  137.09    8.60
  -9 -10  -4    4.30    2.40
   9  10   4   -4.70    2.80
   9  10   4    0.30    2.50
   9  10   4   -2.20    2.20
  -9 -11  -4   64.89    5.30
   9  11   4   67.59    6.60
   9  11   4   67.99    5.20
   9  11   4   67.19    6.10
  -9 -12  -4    7.50    3.30
   9  12   4    7.60    2.90
   9  12   4    3.50    3.00
   9  12   4    5.70    3.90
   8 -12   4   34.00    3.50
   8 -12   4   24.80    5.10
   8 -11   4    0.30    3.30
   8 -11   4   -0.60    1.80
   8 -10   4   -0.40    1.70
   8 -10   4   -0.90    3.10
   8  -9   4    0.10    2.90
   8  -9   4    0.10    1.50
  -8   8  -4   57.89    3.80
   8  -8   4   59.89    3.70
   8  -8   4   57.69    3.70
   8  -8   4   56.59    3.70
   8  -8   4   60.29    5.80
  -8   7  -4   27.00    2.40
   8  -7   4   30.40    2.60
   8  -7   4   26.50    4.10
   8  -7   4   29.50    2.40
  -8   6  -4   70.89    3.70
  -8   6  -4   72.09    3.80
   8  -6   4   69.39    3.80
   8  -6   4   76.79    5.90
   8  -6   4   68.89    3.90
  -8   5  -4  176.08    7.70
  -8   5  -4  164.18    7.70
   8  -5   4  172.58    7.70
   8  -5   4  178.08    7.80
   8  -5   4  172.88   10.00
  -8   4  -4    4.00    0.90
  -8   4  -4    4.40    0.90
   8  -4   4    4.30    1.00
   8  -4   4    5.60    2.20
   8  -4   4    4.70    1.00
  -8   3  -4   18.60    1.20
  -8   3  -4   20.50    1.30
   8  -3   4   23.30    2.80
   8  -3   4   19.90    1.40
   8  -3   4   19.80    1.50
   8  -2   4  227.28   11.40
   8  -2   4  199.88    9.10
   8  -1   4    0.80    1.50
   8  -1   4    1.90    0.80
   8  -1   4    0.00    0.60
  -8   0  -4    1.40    0.70
  -8   0  -4    1.70    0.60
   8   0   4    0.60    0.70
   8   0   4    2.60    1.30
   8   0   4    2.70    1.80
   8   0   4    2.80    0.80
  -8  -1  -4    0.50    0.80
  -8  -1  -4    0.40    0.80
   8   1   4    0.10    0.90
   8   1   4    1.20    1.60
   8   1   4    2.20    1.20
   8   1   4    0.30    0.90
  -8  -2  -4  188.08    9.30
  -8  -2  -4  222.28    9.30
   8   2   4  232.48   10.60
   8   2   4  196.38    9.40
   8   2   4  229.38    9.40
  -8  -3  -4   21.60    1.80
  -8  -3  -4   21.20    1.90
   8   3   4   21.60    1.90
   8   3   4   20.80    1.80
   8   3   4   16.50    2.60
  -8  -4  -4    5.80    1.50
  -8  -4  -4    5.40    1.30
   8   4   4    5.10    1.40
   8   4   4    5.30    1.40
   8   4   4    7.30    2.20
  -8  -5  -4  170.18    8.10
   8   5   4  180.28    8.20
   8   5   4  176.68    8.10
   8   5   4  153.68    9.00
  -8  -6  -4   73.69    4.50
   8   6   4   68.39    5.40
   8   6   4   73.09    4.30
   8   6   4   69.29    4.40
  -8  -7  -4   27.00    3.10
   8   7   4   30.40    3.70
   8   7   4   29.10    2.90
   8   7   4   30.90    3.10
  -8  -8  -4   65.59    4.50
   8   8   4   58.39    4.40
   8   8   4   67.19    5.60
   8   8   4   64.99    4.50
   8   8   4   64.49    4.50
  -8  -9  -4   -1.10    2.00
   8   9   4   -1.30    2.00
   8   9   4   -1.70    2.30
   8   9   4    2.40    2.70
  -8 -10  -4   -2.70    2.20
   8  10   4    1.10    2.40
   8  10   4   -2.30    2.20
   8  10   4   -2.40    2.70
  -8 -11  -4    0.60    2.50
   8  11   4   -2.50    2.40
   8  11   4   -2.80    3.00
   8  11   4    0.70    2.40
  -8 -12  -4   30.30    4.10
   8  12   4   34.40    4.00
   8  12   4   28.30    4.50
   8  12   4   31.30    4.10
   7 -13   4   25.90    3.40
   7 -12   4   45.30    4.30
   7 -12   4   67.69    7.00
   7 -11   4   17.60    2.70
   7 -11   4   18.30    4.10
  -7  10  -4   79.59    5.20
   7 -10   4   85.89    5.00
   7 -10   4   84.89    7.30
  -7   9  -4    6.80    2.10
   7  -9   4   11.00    3.50
   7  -9   4   10.40    2.00
   7  -9   4    6.60    1.90
  -7   8  -4  100.99    5.50
   7  -8   4  113.39    5.50
   7  -8   4  104.99    5.50
   7  -8   4  104.79    7.50
   7  -8   4  101.69    5.30
  -7   7  -4   45.10    3.10
   7  -7   4   46.70    5.00
   7  -7   4   46.80    3.20
   7  -7   4   46.80    3.10
  -7   6  -4  108.09    4.90
  -7   6  -4   96.29    5.00
   7  -6   4  105.59    5.00
   7  -6   4   98.69    5.00
   7  -6   4   96.49    6.90
  -7   5  -4  108.59    5.00
  -7   5  -4  106.09    5.00
   7  -5   4  104.99    5.00
   7  -5   4  101.79    5.00
   7  -5   4  108.49    6.90
  -7   4  -4   88.79    4.00
  -7   4  -4   81.79    4.00
  -7   4  -4   86.39    5.60
   7  -4   4   79.69    5.60
   7  -4   4   88.29    4.10
   7  -4   4   92.49    4.10
  -7   3  -4  132.49    5.90
   7  -3   4  141.19    7.70
   7  -3   4  134.39    5.90
   7  -3   4  134.49    6.00
   7  -2   4  159.18    6.80
   7  -2   4  147.39    8.60
   7  -2   4  161.98    6.80
   7  -1   4   74.49    4.40
   7  -1   4   68.39    3.20
  -7   0  -4  385.46   16.90
  -7   0  -4  402.76   17.00
   7   0   4  400.36   18.40
   7   0   4  437.36   17.00
   7   0   4  387.66   20.20
   7   0   4  397.76   17.00
  -7  -1  -4   52.89    2.90
  -7  -1  -4   64.19    2.90
   7   1   4   66.19    3.00
   7   1   4   67.89    4.10
   7   1   4   52.69    3.00
  -7  -2  -4  161.28    7.00
  -7  -2  -4  152.08    7.00
   7   2   4  153.78    7.00
   7   2   4  164.88    7.10
   7   2   4  153.08    8.00
  -7  -3  -4  141.29    7.00
  -7  -3  -4  129.39    6.30
  -7  -3  -4  142.59    6.30
   7   3   4  133.89    6.40
   7   3   4  132.39    6.30
   7   3   4  143.79    7.30
  -7  -4  -4   85.19    4.50
  -7  -4  -4   90.29    4.40
   7   4   4   79.29    5.30
   7   4   4   86.59    4.50
   7   4   4   96.19    4.60
  -7  -5  -4  104.09    5.50
   7   5   4  110.69    5.40
   7   5   4  113.69    6.30
   7   5   4  101.59    5.40
  -7  -6  -4  100.09    5.40
   7   6   4  108.39    5.50
   7   6   4   93.89    6.20
   7   6   4   97.89    5.40
  -7  -7  -4   47.20    3.80
   7   7   4   47.90    3.60
   7   7   4   50.49    4.70
   7   7   4   45.90    3.70
  -7  -8  -4  111.89    6.10
   7   8   4  105.39    5.90
   7   8   4  107.29    6.90
   7   8   4  101.19    6.50
   7   8   4  119.49    6.20
   7   8   4  100.69    7.00
  -7  -9  -4    5.50    2.30
   7   9   4    8.10    2.90
   7   9   4    6.80    2.60
   7   9   4   10.50    2.40
   7   9   4   10.70    2.20
  -7 -10  -4   94.99    6.00
   7  10   4   92.39    5.80
   7  10   4   87.49    6.80
   7  10   4   89.99    6.40
  -7 -11  -4   29.20    3.70
   7  11   4   28.90    3.70
   7  11   4   18.70    3.30
   7  11   4   27.10    4.20
  -7 -12  -4   55.49    5.10
   7  12   4   54.79    5.80
   7  12   4   58.59    5.30
   7  12   4   61.89    5.30
  -7 -13  -4   28.90    4.00
   7  13   4   25.20    4.60
   7  13   4   26.80    3.90
   7  13   4   27.80    4.00
   6 -13   4   50.79    4.50
   6 -12   4    8.10    2.40
   6 -12   4    6.90    3.70
   6 -11   4   63.39    4.40
   6 -11   4   51.99    5.70
   6 -10   4    6.90    3.50
   6 -10   4    8.30    2.10
   6  -9   4  127.09    6.80
   6  -9   4  148.29    7.00
   6  -9   4  131.79    8.90
   6  -8   4   22.40    2.40
   6  -8   4   21.00    2.30
   6  -8   4   23.90    3.90
  -6   7  -4  286.07   12.30
   6  -7   4  288.17   12.30
   6  -7   4  265.87   12.20
   6  -7   4  276.67   15.10
   6  -7   4  260.97   12.80
  -6   6  -4   17.60    1.70
  -6   6  -4   15.40    1.70
   6  -6   4   17.00    1.70
   6  -6   4   17.50    1.80
   6  -6   4   13.80    2.80
  -6   5  -4   50.69    4.10
  -6   5  -4   52.39    2.90
  -6   5  -4   49.30    2.80
   6  -5   4   52.19    2.90
   6  -5   4   50.89    2.90
   6  -5   4   53.99    4.40
  -6   4  -4   16.90    1.40
  -6   4  -4   16.40    1.40
  -6   4  -4   14.20    2.20
   6  -4   4   17.90    1.50
   6  -4   4   16.60    1.50
   6  -4   4   15.60    2.30
  -6   3  -4  144.79    6.10
   6  -3   4  147.19    6.20
   6  -3   4  129.79    6.20
   6  -3   4  142.99    7.90
   6  -2   4  108.19    4.40
   6  -2   4   99.09    4.40
   6  -2   4   90.89    5.80
   6  -1   4 1196.58   56.89
   6  -1   4 1079.39   48.30
   6  -1   4 1189.18   48.30
  -6  -1  -4 1047.30   47.90
   6   1   4 1214.98   48.00
   6   1   4 1060.89   48.00
   6   1   4 1254.17   50.69
  -6  -2  -4  106.59    4.60
  -6  -2  -4   96.39    4.70
   6   2   4   91.89    5.50
   6   2   4  106.29    4.70
   6   2   4   98.89    4.60
  -6  -3  -4  137.49    6.70
  -6  -3  -4  156.58    7.40
  -6  -3  -4  151.98    6.60
   6   3   4  146.69    6.60
   6   3   4  132.79    6.60
   6   3   4  152.18    7.50
  -6  -4  -4   21.90    1.80
  -6  -4  -4   19.70    1.90
   6   4   4   18.10    1.80
   6   4   4   20.60    1.90
   6   4   4   15.00    2.30
  -6  -5  -4   55.59    3.30
  -6  -5  -4   53.29    3.40
   6   5   4   48.40    3.40
   6   5   4   50.99    3.30
   6   5   4   53.59    4.00
  -6  -6  -4   16.00    2.20
   6   6   4   12.30    2.40
   6   6   4   15.40    2.00
   6   6   4   15.10    2.20
  -6  -7  -4  273.97   12.80
   6   7   4  292.17   12.80
   6   7   4  274.67   13.70
   6   7   4  283.27   12.90
  -6  -8  -4   23.00    2.80
   6   8   4   18.80    2.60
   6   8   4   18.20    3.10
   6   8   4   28.00    2.90
   6   8   4   23.60    2.80
   6   8   4   17.80    3.00
  -6  -9  -4  137.09    7.30
   6   9   4  126.59    7.10
   6   9   4  137.29    7.90
   6   9   4  139.39    7.90
   6   9   4  127.99    8.10
  -6 -10  -4    7.80    2.60
   6  10   4    8.80    3.10
   6  10   4    9.00    2.70
   6  10   4   13.70    2.70
  -6 -11  -4   66.69    5.30
   6  11   4   64.79    5.20
   6  11   4   64.29    5.90
   6  11   4   65.79    5.40
  -6 -12  -4    2.20    2.70
   6  12   4    6.10    3.30
   6  12   4    3.20    2.50
   6  12   4    5.90    2.90
  -6 -13  -4   53.89    5.00
   6  13   4   52.19    4.90
   6  13   4   37.10    5.10
   6  13   4   43.80    4.60
   5 -13   4   33.30    3.70
  -5  12  -4   45.40    4.00
   5 -12   4   41.10    3.90
   5 -12   4   36.40    5.30
  -5  11  -4   19.70    2.70
   5 -11   4   12.80    2.50
   5 -11   4   14.00    3.70
  -5  10  -4   43.50    3.40
   5 -10   4   37.60    3.40
   5 -10   4   42.60    5.00
   5 -10   4   42.60    3.40
  -5   9  -4   42.30    3.30
   5  -9   4   40.10    4.90
   5  -9   4   44.80    3.40
   5  -9   4   39.10    3.40
  -5   8  -4  107.59    5.40
   5  -8   4   96.89    5.40
   5  -8   4  102.79    7.40
   5  -8   4  110.29    5.60
  -5   7  -4  185.58    8.20
   5  -7   4  176.18   10.40
   5  -7   4  172.58    9.00
   5  -7   4  173.48    8.20
   5  -7   4  175.58    8.20
  -5   6  -4  143.29    6.50
  -5   6  -4  159.08    8.50
   5  -6   4  142.99    7.40
   5  -6   4  137.09    8.30
   5  -6   4  143.29    6.60
   5  -6   4  127.69    6.50
   5  -6   4  132.29    6.80
  -5   5  -4  176.48    7.70
  -5   5  -4  176.18    9.60
   5  -5   4  162.68    9.60
   5  -5   4  177.28    7.80
   5  -5   4  169.48    7.70
  -5   4  -4  218.68   10.80
  -5   4  -4  196.28    8.80
  -5   4  -4  198.78    8.80
   5  -4   4  196.98    8.80
   5  -4   4  203.68   10.90
   5  -4   4  195.58    8.80
  -5   3  -4  211.88    9.10
  -5   3  -4  202.48    9.00
   5  -3   4  225.18    9.10
   5  -3   4  208.68    9.10
   5  -3   4  208.28   11.20
   5  -2   4  260.67   13.00
   5  -2   4  243.28   10.70
   5  -2   4  252.97   10.70
   5  -1   4  173.58    9.10
  -5   0  -4  729.93   30.70
  -5   0  -4  720.03   30.80
   5   0   4  726.83   30.80
   5   0   4  743.83   30.80
   5   0   4  752.92   32.70
  -5  -1  -4  182.08    8.00
  -5  -1  -4  193.58    8.00
   5   1   4  168.58    8.80
   5   1   4  187.78    8.00
   5   1   4  197.98    8.10
  -5  -2  -4  245.18   11.00
  -5  -2  -4  264.47   11.90
   5   2   4  260.47   11.00
   5   2   4  243.48   11.00
   5   2   4  264.37   11.90
  -5  -3  -4  226.98    9.50
  -5  -3  -4  200.58   10.10
  -5  -3  -4  212.88    9.50
   5   3   4  210.38   10.30
   5   3   4  212.88    9.50
   5   3   4  223.08    9.50
  -5  -4  -4  192.08    9.00
  -5  -4  -4  204.98    9.00
   5   4   4  207.88    9.10
   5   4   4  195.38    9.10
   5   4   4  208.38    9.80
  -5  -5  -4  161.38    7.90
  -5  -5  -4  184.28    7.90
   5   5   4  170.88    7.90
   5   5   4  164.78    8.60
   5   5   4  164.88    7.80
  -5  -6  -4  149.49    6.90
  -5  -6  -4  128.59    6.80
   5   6   4  147.69    7.00
   5   6   4  137.59    7.50
   5   6   4  141.19    6.90
  -5  -7  -4  170.88    8.60
   5   7   4  195.08    8.70
   5   7   4  179.88    9.30
   5   7   4  179.78    8.70
   5   7   4  171.88    9.50
  -5  -8  -4  108.69    6.00
   5   8   4  112.49    6.60
   5   8   4  108.79    5.90
   5   8   4  106.79    6.50
   5   8   4  100.89    6.70
   5   8   4  107.69    6.00
  -5  -9  -4   42.10    3.90
   5   9   4   46.10    4.00
   5   9   4   35.90    3.90
   5   9   4   48.10    4.50
   5   9   4   41.20    3.70
  -5 -10  -4   49.90    4.30
   5  10   4   42.80    4.40
   5  10   4   44.20    4.00
   5  10   4   46.10    4.60
  -5 -11  -4   16.80    3.20
   5  11   4   20.60    3.10
   5  11   4   18.70    3.00
   5  11   4   19.20    3.60
  -5 -12  -4   39.60    4.20
   5  12   4   42.50    4.80
   5  12   4   37.90    4.00
   5  12   4   36.60    4.00
  -5 -13  -4   30.40    4.20
   5  13   4   32.10    3.90
   5  13   4   39.60    4.90
   5  13   4   38.60    4.20
   4 -14   4   72.19    5.60
   4 -13   4   12.20    2.80
  -4  12  -4  169.38    8.40
   4 -12   4  160.18   10.90
   4 -12   4  158.08    8.40
  -4  11  -4    4.70    2.20
   4 -11   4    5.90    2.20
   4 -11   4    4.40    2.20
   4 -11   4    8.00    3.30
  -4  10  -4  151.08    7.80
   4 -10   4  159.88    7.80
   4 -10   4  154.88    7.80
   4 -10   4  150.88    9.80
  -4   9  -4   25.00    2.70
   4  -9   4   19.50    2.60
   4  -9   4   27.00    3.90
   4  -9   4   24.40    2.60
  -4   8  -4  405.76   17.40
   4  -8   4  418.36   17.50
   4  -8   4  374.56   20.90
   4  -8   4  402.76   18.60
   4  -8   4  382.86   17.40
  -4   7  -4    2.70    1.40
  -4   7  -4    3.50    1.40
   4  -7   4    1.80    1.40
   4  -7   4    3.80    2.30
   4  -7   4    3.20    1.50
   4  -7   4    5.60    1.80
  -4   6  -4  672.13   34.40
  -4   6  -4  693.33   29.10
  -4   6  -4  698.63   29.10
   4  -6   4  658.93   29.10
   4  -6   4  688.93   29.10
   4  -6   4  676.43   34.50
   4  -6   4  691.43   30.70
  -4   5  -4   75.89    4.60
  -4   5  -4   62.09    3.40
  -4   5  -4   54.29    3.30
   4  -5   4   85.89    4.90
   4  -5   4   53.59    3.40
   4  -5   4   65.69    3.50
   4  -5   4   76.29    3.50
  -4   4  -4  391.06   19.40
  -4   4  -4  384.96   16.20
  -4   4  -4  364.66   16.20
   4  -4   4  373.06   19.40
   4  -4   4  376.76   16.20
   4  -4   4  384.76   16.20
  -4   3  -4   24.20    1.40
   4  -3   4   15.30    1.40
  -4   2  -4 1998.50   81.49
  -4   2  -4 1879.61   81.49
   4  -2   4 1988.00   81.59
   4  -2   4 1996.20   95.59
   4  -2   4 1876.51   81.49
   4  -1   4   34.50    2.50
   4   0   4 2291.07   95.69
   4   0   4 2047.90   91.19
   4   0   4 2196.18   91.09
  -4  -1  -4   41.60    1.90
  -4  -1  -4   35.20    1.90
   4   1   4   37.80    1.90
   4   1   4   35.20    2.60
   4   1   4   37.90    2.00
  -4  -2  -4 1851.61   80.99
  -4  -2  -4 1962.90   80.79
   4   2   4 1747.43   80.89
   4   2   4 2044.50   84.69
   4   2   4 2011.60   80.79
  -4  -3  -4   36.30    2.30
   4   3   4   38.60    2.40
  -4  -4  -4  355.96   16.40
  -4  -4  -4  391.86   16.40
   4   4   4  390.26   16.40
   4   4   4  372.36   16.40
   4   4   4  385.86   17.40
  -4  -5  -4   63.19    3.80
  -4  -5  -4   64.29    3.70
   4   5   4   85.49    4.50
   4   5   4   68.59    3.90
   4   5   4   61.59    3.90
  -4  -6  -4  687.63   31.00
  -4  -6  -4  707.23   29.50
  -4  -6  -4  668.83   29.50
   4   6   4  687.73   31.10
   4   6   4  684.03   32.00
   4   6   4  688.83   29.50
   4   6   4  694.93   29.50
  -4  -7  -4    3.90    1.80
   4   7   4    1.70    1.70
   4   7   4    6.30    2.20
   4   7   4    3.40    1.60
   4   7   4    1.20    1.60
   4   7   4    4.80    2.00
  -4  -8  -4  393.96   17.40
   4   8   4  397.46   20.10
   4   8   4  390.26   18.70
   4   8   4  399.76   17.40
   4   8   4  377.76   17.30
   4   8   4  378.06   18.40
  -4  -9  -4   20.70    3.00
   4   9   4   25.60    3.40
   4   9   4   27.40    3.20
   4   9   4   26.90    3.20
   4   9   4   24.80    3.00
  -4 -10  -4  159.68    8.40
   4  10   4  153.78    9.00
   4  10   4  166.88    8.50
   4  10   4  159.08    8.70
  -4 -11  -4    3.40    2.40
   4  11   4    4.90    3.00
   4  11   4    6.30    2.40
   4  11   4    7.00    2.30
  -4 -12  -4  171.88    9.00
   4  12   4  142.19    8.90
   4  12   4  180.48    8.90
   4  12   4  162.78    9.70
  -4 -13  -4    9.90    3.20
   4  13   4   14.10    3.30
   4  13   4   14.90    3.80
   4  13   4    8.60    2.60
  -4 -14  -4   75.59    6.10
   4  14   4   72.29    6.00
   4  14   4   81.09    7.10
   3 -14   4    3.30    2.60
  -3  13  -4   12.60    2.80
   3 -13   4   10.80    2.70
  -3  12  -4    9.80    2.60
   3 -12   4    8.40    3.70
   3 -12   4    9.10    2.60
  -3  11  -4   25.50    3.10
   3 -11   4   24.10    3.20
   3 -11   4   25.00    4.20
   3 -11   4   27.60    3.10
  -3  10  -4   15.90    2.50
   3 -10   4   14.50    2.50
   3 -10   4   15.10    3.70
   3 -10   4   18.90    2.60
  -3   9  -4   70.29    4.50
   3  -9   4   67.09    4.40
   3  -9   4   66.99    6.00
   3  -9   4   82.29    4.50
  -3   8  -4   43.50    3.10
   3  -8   4   45.10    3.20
   3  -8   4   38.80    3.80
   3  -8   4   39.70    4.40
   3  -8   4   37.50    3.10
  -3   7  -4  195.58    9.00
  -3   7  -4  183.58    8.90
   3  -7   4  203.38    9.10
   3  -7   4  193.88    9.00
   3  -7   4  202.68    9.60
   3  -7   4  199.18   11.10
  -3   6  -4   49.40    3.00
  -3   6  -4   49.00    3.00
   3  -6   4   48.90    3.50
   3  -6   4   49.70    4.20
   3  -6   4   51.89    3.00
   3  -6   4   47.90    3.10
  -3   5  -4  196.98    8.70
  -3   5  -4  186.78   10.40
  -3   5  -4  194.38    8.70
   3  -5   4  193.48   10.60
   3  -5   4  204.38    8.70
   3  -5   4  189.38    9.20
   3  -5   4  193.08    9.00
   3  -5   4  195.98    8.70
  -3   4  -4   19.10    1.50
  -3   4  -4   30.80    1.80
  -3   4  -4   24.00    2.50
   3  -4   4   26.50    2.70
   3  -4   4   25.40    1.80
   3  -4   4   23.90    1.80
   3  -4   4   31.20    1.90
  -3   3  -4  268.47   11.60
  -3   3  -4  276.57   11.60
   3  -3   4  274.07   13.90
   3  -3   4  268.07   11.60
   3  -3   4  267.07   11.60
  -3   2  -4   34.60    1.60
  -3   2  -4   33.10    1.60
   3  -2   4   32.20    1.70
   3  -2   4   31.90    2.50
   3  -2   4   34.80    1.70
   3   0   4    7.80    0.70
   3   0   4   10.10    1.30
   3   0   4    8.60    0.70
  -3  -1  -4  307.57   13.20
  -3  -1  -4  315.97   14.00
  -3  -1  -4  323.97   13.20
   3   1   4  307.57   13.20
   3   1   4  303.17   14.10
   3   1   4  309.47   13.20
  -3  -2  -4   33.50    1.90
  -3  -2  -4   32.40    1.90
  -3  -2  -4   30.80    2.20
   3   2   4   37.70    2.00
   3   2   4   30.70    2.40
   3   2   4   28.00    1.90
  -3  -3  -4  269.87   11.60
   3   3   4  269.57   11.70
   3   3   4  267.87   11.70
   3   3   4  266.07   12.40
  -3  -4  -4   27.20    2.10
  -3  -4  -4   24.60    2.00
   3   4   4   27.30    2.10
   3   4   4   18.00    2.00
   3   4   4   27.60    2.10
   3   4   4   22.80    2.30
  -3  -5  -4  194.58    8.70
  -3  -5  -4  187.18    8.70
   3   5   4  189.28    9.50
   3   5   4  191.18    9.30
   3   5   4  186.68    8.70
   3   5   4  193.98    8.70
  -3  -6  -4   45.30    3.60
  -3  -6  -4   48.70    3.30
   3   6   4   48.30    3.20
   3   6   4   49.99    3.30
   3   6   4   43.00    3.50
   3   6   4   51.19    3.90
  -3  -7  -4  197.28    9.50
  -3  -7  -4  212.58    9.40
  -3  -7  -4  198.58   10.10
   3   7   4  208.98    9.40
   3   7   4  198.38   10.20
   3   7   4  192.68   10.10
   3   7   4  202.78   10.90
   3   7   4  198.88    9.50
  -3  -8  -4   42.30    3.60
   3   8   4   37.30    3.70
   3   8   4   44.10    3.90
   3   8   4   42.90    3.40
   3   8   4   39.50    3.70
   3   8   4   39.80    3.60
  -3  -9  -4   71.19    4.80
   3   9   4   70.49    4.80
   3   9   4   60.99    5.20
   3   9   4   72.79    4.80
  -3 -10  -4   13.00    2.80
   3  10   4   15.70    2.70
   3  10   4   12.00    2.40
   3  10   4   16.50    3.30
  -3 -11  -4   21.40    3.30
   3  11   4   22.40    3.60
   3  11   4   23.00    3.30
   3  11   4   27.40    3.10
  -3 -12  -4    4.70    2.70
   3  12   4    5.30    2.10
   3  12   4    9.00    3.20
   3  12   4   13.70    2.80
  -3 -13  -4   14.20    3.20
   3  13   4   12.90    3.20
   3  13   4    3.50    3.20
  -3 -14  -4    7.10    3.30
   3  14   4    5.10    3.50
   3  14   4    5.10    2.90
  -2  14  -4   10.40    2.90
   2 -14   4    8.30    2.90
  -2  13  -4  221.58   10.90
   2 -13   4  211.88   10.80
  -2  12  -4   44.90    4.00
   2 -12   4   41.50    4.10
   2 -12   4   40.10    5.30
  -2  11  -4   62.59    4.40
   2 -11   4   59.79    6.00
   2 -11   4   56.29    4.40
  -2  10  -4   37.90    3.50
   2 -10   4   37.80    3.60
   2 -10   4   36.50    4.40
   2 -10   4   39.30    3.60
  -2   9  -4  237.38   10.70
   2  -9   4  220.78   13.00
   2  -9   4  223.08   10.70
   2  -9   4  235.98   10.70
  -2   8  -4  253.47   11.40
   2  -8   4  246.28   12.00
   2  -8   4  256.67   11.40
   2  -8   4  256.57   13.70
   2  -8   4  235.78   11.30
  -2   7  -4  747.33   31.60
  -2   7  -4  718.03   37.10
  -2   7  -4  771.02   31.60
   2  -7   4  740.83   33.20
   2  -7   4  725.43   31.60
   2  -7   4  710.93   37.20
   2  -7   4  760.12   31.60
  -2   6  -4  102.39    6.00
  -2   6  -4   89.99    4.90
  -2   6  -4  100.19    4.90
   2  -6   4   89.69    4.90
   2  -6   4   88.09    4.80
   2  -6   4  109.99    5.30
   2  -6   4  101.49    6.10
  -2   5  -4  504.95   21.40
  -2   5  -4  507.15   21.40
  -2   5  -4  488.25   25.20
   2  -5   4  503.75   21.40
   2  -5   4  504.25   21.40
   2  -5   4  513.15   22.50
   2  -5   4  479.65   25.20
  -2   4  -4  241.08   11.40
   2  -4   4  300.77   12.10
   2  -4   4  227.08   11.40
   2  -4   4  286.17   12.00
   2  -4   4  251.87   11.40
   2  -4   4  272.27   13.60
  -2   3  -4  456.75   19.10
  -2   3  -4  444.26   19.00
   2  -3   4  441.86   19.10
   2  -3   4  446.86   22.50
   2  -3   4  442.86   19.10
   2  -3   4  463.35   20.50
  -2   2  -4  202.78    8.90
  -2   2  -4  204.98    8.90
   2  -2   4  216.58    9.00
   2  -2   4  185.28    8.90
   2  -2   4  243.28   10.80
  -2   1  -4  608.74   26.00
   2  -1   4  606.64   26.00
   2  -1   4  660.93   28.40
   2  -1   4  613.04   26.00
  -2   0  -4   36.60    1.70
   2   0   4   36.60    1.80
   2   0   4   34.20    1.70
  -2  -1  -4  624.14   26.60
  -2  -1  -4  605.94   26.60
  -2  -1  -4  672.93   28.00
   2   1   4  636.44   26.60
   2   1   4  597.54   26.60
   2   1   4  644.24   29.00
   2   1   4  648.64   28.00
  -2  -2  -4  209.78    9.80
  -2  -2  -4  262.17   10.40
  -2  -2  -4  200.68    9.80
   2   2   4  245.68   10.90
   2   2   4  256.57   10.40
   2   2   4  219.18    9.80
   2   2   4  199.58    9.80
  -2  -3  -4  449.06   19.40
   2   3   4  467.25   19.40
   2   3   4  458.75   20.40
   2   3   4  439.46   19.40
   2   3   4  457.35   21.10
  -2  -4  -4  244.18   11.80
   2   4   4  235.18   11.80
   2   4   4  306.77   12.60
   2   4   4  271.57   11.90
   2   4   4  302.47   13.00
  -2  -5  -4  495.35   21.70
   2   5   4  514.65   21.70
   2   5   4  503.65   21.70
   2   5   4  514.05   23.50
   2   5   4  492.95   22.80
  -2  -6  -4   91.69    5.20
  -2  -6  -4  123.19    5.90
  -2  -6  -4   84.99    5.20
   2   6   4  126.29    5.90
   2   6   4  106.49    5.40
   2   6   4   95.29    5.40
   2   6   4  112.09    5.90
  -2  -7  -4  792.92   32.30
  -2  -7  -4  743.83   33.90
  -2  -7  -4  758.72   32.30
   2   7   4  755.82   37.70
   2   7   4  730.73   34.70
   2   7   4  774.62   32.40
   2   7   4  752.42   32.30
   2   7   4  714.83   33.90
  -2  -8  -4  259.27   12.20
   2   8   4  271.77   12.90
   2   8   4  275.97   12.20
   2   8   4  258.57   13.00
   2   8   4  256.67   14.10
   2   8   4  269.67   12.30
  -2  -9  -4  232.48   11.00
   2   9   4  220.98   11.70
   2   9   4  227.08   11.50
   2   9   4  245.58   11.10
  -2 -10  -4   44.50    3.90
   2  10   4   35.80    3.60
   2  10   4   44.70    3.90
   2  10   4   40.10    4.20
  -2 -11  -4   57.99    4.40
   2  11   4   58.69    4.70
   2  11   4   54.39    4.20
   2  11   4   52.69    4.80
  -2 -12  -4   40.80    4.20
   2  12   4   41.50    4.70
   2  12   4   46.90    4.30
   2  12   4   37.50    3.80
  -2 -13  -4  200.88   10.60
   2  13   4  207.88   10.60
   2  13   4  201.28   11.40
  -2 -14  -4    8.20    3.00
   2  14   4    7.60    3.60
   2  14   4    5.20    3.10
  -1  14  -4    0.10    2.60
   1 -14   4    7.20    2.90
  -1  13  -4    1.60    2.50
   1 -13   4    0.50    2.40
  -1  12  -4    2.70    2.20
   1 -12   4    2.70    2.50
  -1  11  -4   -4.40    2.10
  -1  11  -4   -2.60    2.20
   1 -11   4   -2.00    1.90
   1 -11   4    1.30    2.90
  -1  10  -4   -0.40    2.10
  -1  10  -4   -3.40    2.10
   1 -10   4    2.10    2.70
   1 -10   4   -0.40    2.00
   1 -10   4   -1.00    1.90
  -1   9  -4   -1.60    2.00
  -1   9  -4    3.40    2.10
   1  -9   4    4.90    1.90
   1  -9   4   -1.30    1.90
   1  -9   4    6.20    2.70
   1  -9   4    1.90    1.90
  -1   8  -4    0.90    1.80
  -1   8  -4    2.90    1.70
   1  -8   4    1.00    1.90
   1  -8   4    5.60    2.40
   1  -8   4    4.50    1.70
   1  -8   4    1.30    1.70
  -1   7  -4    1.30    1.50
  -1   7  -4    0.20    1.40
  -1   7  -4   -0.40    1.40
  -1   7  -4    1.00    1.50
   1  -7   4   -0.90    1.40
   1  -7   4   -0.30    1.30
   1  -7   4    0.60    1.90
   1  -7   4   -1.70    1.40
  -1   6  -4   -0.10    1.20
  -1   6  -4    0.40    1.20
  -1   6  -4   -2.40    1.30
  -1   6  -4    0.60    1.30
   1  -6   4   -0.50    1.20
   1  -6   4   -0.20    1.30
   1  -6   4   -1.10    1.30
   1  -6   4    0.10    1.70
  -1   5  -4   -0.10    1.10
  -1   5  -4    2.10    1.30
  -1   5  -4    0.30    1.10
   1  -5   4    1.20    1.10
   1  -5   4    2.10    1.50
   1  -5   4    1.00    1.20
   1  -5   4    1.00    1.20
  -1   4  -4   12.40    1.40
  -1   4  -4   15.70    1.80
   1  -4   4   14.90    1.50
   1  -4   4   12.30    1.40
   1  -4   4   12.80    1.40
   1  -4   4   15.50    1.80
  -1   3  -4    3.00    0.70
  -1   3  -4    2.50    0.80
  -1   3  -4    2.90    0.80
  -1   3  -4    0.40    0.70
   1  -3   4    3.80    1.40
   1  -3   4    3.70    1.00
   1  -3   4    1.10    0.90
   1  -3   4    3.10    0.60
   1  -3   4    1.80    0.90
  -1   2  -4   63.49    3.00
  -1   2  -4   66.79    3.40
  -1   2  -4   64.99    3.10
   1  -2   4   61.79    3.40
   1  -2   4   65.29    3.10
   1  -2   4   66.79    3.90
   1  -2   4   63.59    3.10
  -1   1  -4  153.28    6.70
  -1   1  -4  161.18    7.50
  -1   1  -4  154.98    6.70
   1  -1   4  152.78    6.70
   1  -1   4  159.98    7.50
   1  -1   4  158.28    6.70
  -1   0  -4    2.10    0.50
  -1   0  -4    1.50    0.70
  -1   0  -4    1.90    0.50
  -1   0  -4    2.00    1.00
   1   0   4    2.10    0.60
   1   0   4    2.20    0.50
   1   0   4    2.00    0.70
   1   0   4    1.70    0.90
  -1  -1  -4  159.18    7.20
  -1  -1  -4  154.68    6.80
  -1  -1  -4  151.08    6.70
   1   1   4  159.78    6.80
   1   1   4  157.58    7.60
   1   1   4  151.48    7.20
  -1  -2  -4   65.89    3.60
  -1  -2  -4   68.79    3.30
  -1  -2  -4   61.69    3.20
  -1  -2  -4   67.39    3.80
   1   2   4   63.29    3.30
   1   2   4   66.79    3.80
   1   2   4   67.89    3.60
   1   2   4   65.49    3.30
  -1  -3  -4    1.60    1.00
  -1  -3  -4    1.60    1.20
  -1  -3  -4    2.50    1.00
   1   3   4    2.70    0.90
   1   3   4    2.30    1.20
   1   3   4    2.70    1.20
   1   3   4    1.90    1.00
  -1  -4  -4   11.70    1.50
   1   4   4   14.00    1.50
   1   4   4   11.20    1.60
   1   4   4   13.10    1.60
   1   4   4   15.10    1.60
  -1  -5  -4   -0.30    0.40
  -1  -5  -4    0.80    1.20
  -1  -5  -4   -0.30    1.30
   1   5   4    1.80    1.30
   1   5   4    0.60    1.40
   1   5   4   -0.70    1.50
   1   5   4    1.20    1.30
  -1  -6  -4   -2.50    1.30
  -1  -6  -4    1.00    1.50
  -1  -6  -4   -0.90    1.30
   1   6   4    0.50    1.40
   1   6   4    0.00    1.40
   1   6   4    1.50    1.70
   1   6   4   -1.20    1.20
  -1  -7  -4    2.00    1.50
  -1  -7  -4   -0.30    1.30
  -1  -7  -4   -2.20    1.50
   1   7   4   -0.30    1.40
   1   7   4    0.40    1.40
   1   7   4   -1.80    1.40
   1   7   4    2.30    2.00
   1   7   4    1.50    1.60
  -1  -8  -4    1.70    1.90
   1   8   4    1.10    1.80
   1   8   4    6.90    2.10
   1   8   4    0.90    2.30
   1   8   4    6.10    1.90
   1   8   4    1.40    1.50
  -1  -9  -4    3.80    2.00
   1   9   4    2.50    2.00
   1   9   4    2.50    2.40
   1   9   4    3.60    1.60
  -1 -10  -4    1.40    2.30
   1  10   4   -0.50    1.60
   1  10   4   -0.90    2.60
   1  10   4    0.80    2.10
  -1 -11  -4    4.20    2.50
   1  11   4   -0.10    2.00
   1  11   4   -1.50    1.60
   1  11   4   -4.60    2.50
  -1 -12  -4    1.60    2.60
   1  12   4    1.00    2.70
   1  12   4    1.50    1.80
   1  12   4    0.30    2.40
  -1 -13  -4   -4.20    2.30
   1  13   4    0.80    3.00
   1  13   4   -4.60    2.40
  -1 -14  -4    5.20    2.80
[truncated: 1,307,524 more chars]
